# Supplementary material
Source: publisher site journal article supplement (https://www.degruyterbrill.com/publication/isbn/9783486989434/downloadAsset/9783486989434_Folien--de.zip)
Supplement: Supplementary file 1 [file Teil_A_ABWL.pdf › Teil_A_ABWL.pdf]

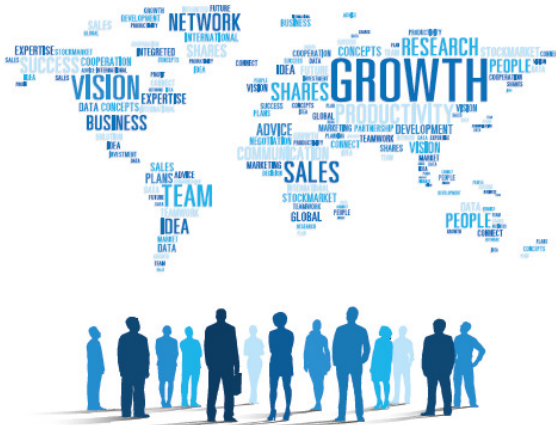

## KAPITEL A: GRUNDLAGEN DER BETRIEBSWIRTSCHAFTSLEHRE

2. WIRTSCHAFTSSYSTEME UND TRÄGER DER WIRTSCHAFT
3. DIE BETRIEBSWIRTSCHAFTSLEHRE ALS WISSENSCHAFT
4. BETRIEBSWIRTSCHAFTLICHE ZIELKONZEPTIONEN
5. METHODEN UND MODELLE DER BETRIEBSWIRTSCHAFTSLEHRE
6. THEORETISCHE ANSATZPUNKTE DER BETRIEBSWIRTSCHAFTSLEHRE

## **2. WIRTSCHAFTSSYSTEME UND TRÄGER DER WIRTSCHAFT**

### 2.1 GRUNDLAGEN DES WIRTSCHAFTENS

### 2.2 TRÄGER DER WIRTSCHAFT

### 2.3 BESTIMMUNGSGRÖßEN VON BETRIEBEN UND WIRTSCHAFTSSYSTEMEN

### 2.4 BETRIEBSTYPOLOGIE

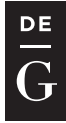

# KAPITEL A: GRUNDLAGEN DER BETRIEBSWIRTSCHAFTSLEHRE

## 2. WIRTSCHAFTSSYSTEME UND TRÄGER DER WIRTSCHAFT

| Bedürfnisart          | Kennzeichnung                     | Einteilungskriterium |
|-----------------------|-----------------------------------|----------------------|
| Existenzbedürfnisse   | Sicherung der physischen Existenz | Dringlichkeit        |
| Grundbedürfnisse      | der jeweiligen Norm angepasst     |                      |
| Luxusbedürfnisse      | verzichtbare Wünsche              |                      |
| Offene Bedürfnisse    | bewusst empfundene Bedürfnisse    | Bewusstheit          |
| Latente Bedürfnisse   | unbewusst empfundene Bedürfnisse  |                      |
| Individualbedürfnisse | Bedürfnisse eines Einzelnen       | Erscheinungsform     |
| Kollektivbedürfnisse  | Bedürfnisse einer Gemeinschaft    |                      |

Seite 5, Abb. 1: Einteilung der Bedürfnisse

# KAPITEL A: GRUNDLAGEN DER BETRIEBSWIRTSCHAFTSLEHRE

## 2. WIRTSCHAFTSSYSTEME UND TRÄGER DER WIRTSCHAFT

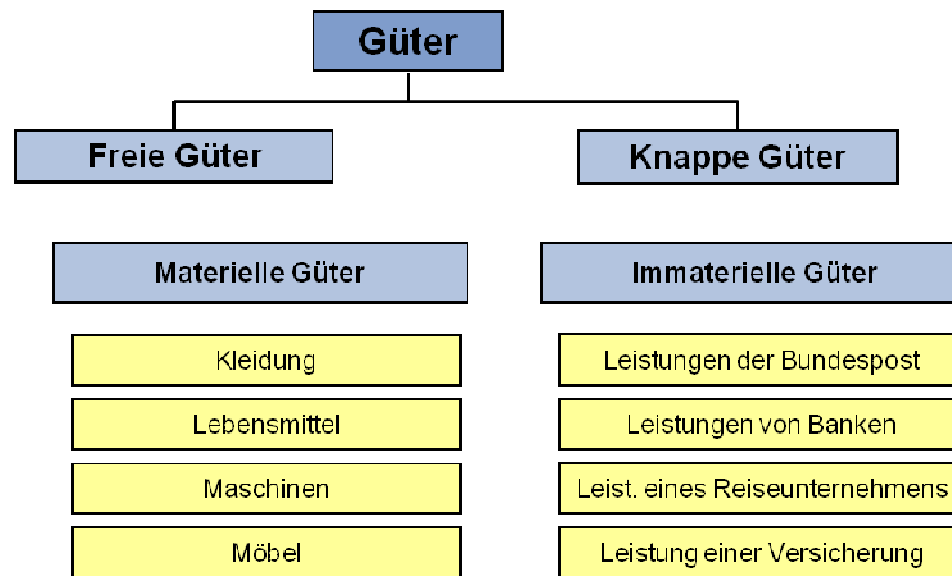

Seite 6, Abb. 2: Unterteilung der Güter

# KAPITEL A: GRUNDLAGEN DER BETRIEBSWIRTSCHAFTSLEHRE

## 2. WIRTSCHAFTSSYSTEME UND TRÄGER DER WIRTSCHAFT

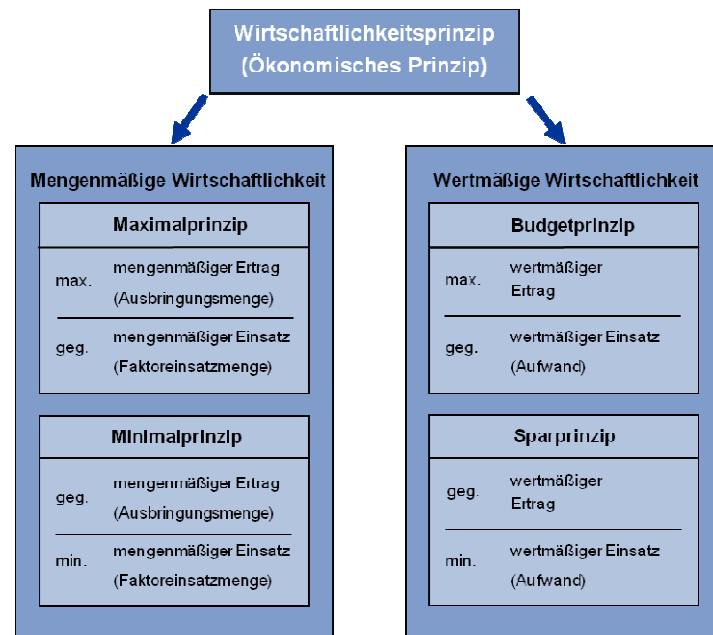

Seite 7, Abb. 3: Ausprägungen des ökonomischen Prinzips

# KAPITEL A: GRUNDLAGEN DER BETRIEBSWIRTSCHAFTSLEHRE

## 2. WIRTSCHAFTSSYSTEME UND TRÄGER DER WIRTSCHAFT

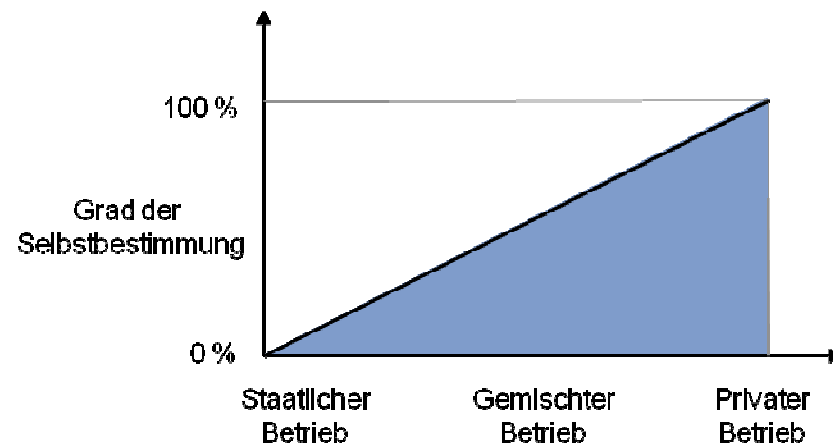

Seite 8, Abb. 4: Selbstbestimmungsgrad von Betrieben  
(in Anlehnung an Thommen, J.-P.: Managementorientierte Betriebswirtschaftslehre, 6.Aufl.,  
Zürich 2000, S. 35)

*Jung: Allgemeine Betriebswirtschaftslehre. De Gruyter Oldenbourg 2016. ISBN 978-3-486-76376-8*

# KAPITEL A: GRUNDLAGEN DER BETRIEBSWIRTSCHAFTSLEHRE

## 2. WIRTSCHAFTSSYSTEME UND TRÄGER DER WIRTSCHAFT

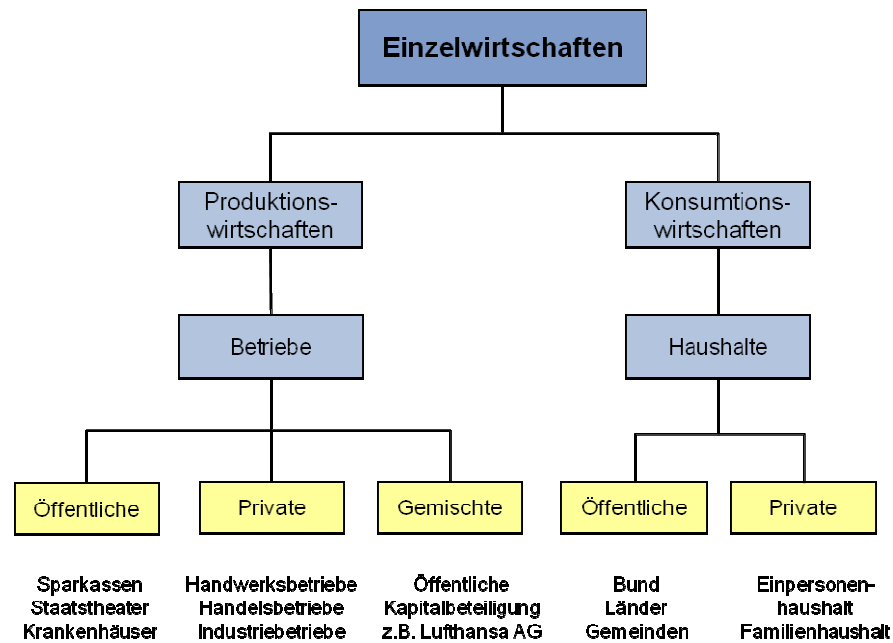

Seite 9, Abb. 5: Übersicht der Einzelwirtschaften



# KAPITEL A: GRUNDLAGEN DER BETRIEBSWIRTSCHAFTSLEHRE

## 2. WIRTSCHAFTSSYSTEME UND TRÄGER DER WIRTSCHAFT

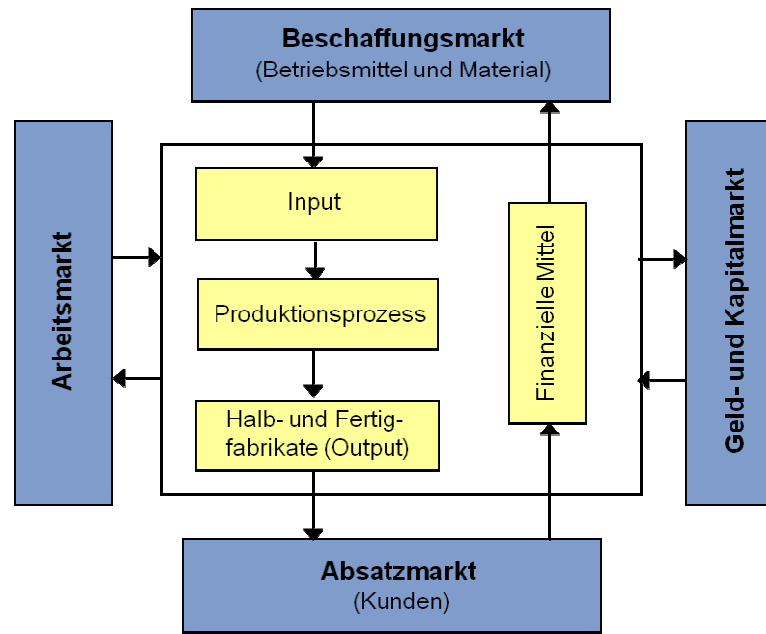

Seite 10, Abb. 6: Betrieblicher Umsatzprozess

# KAPITEL A: GRUNDLAGEN DER BETRIEBSWIRTSCHAFTSLEHRE

## 2. WIRTSCHAFTSSYSTEME UND TRÄGER DER WIRTSCHAFT

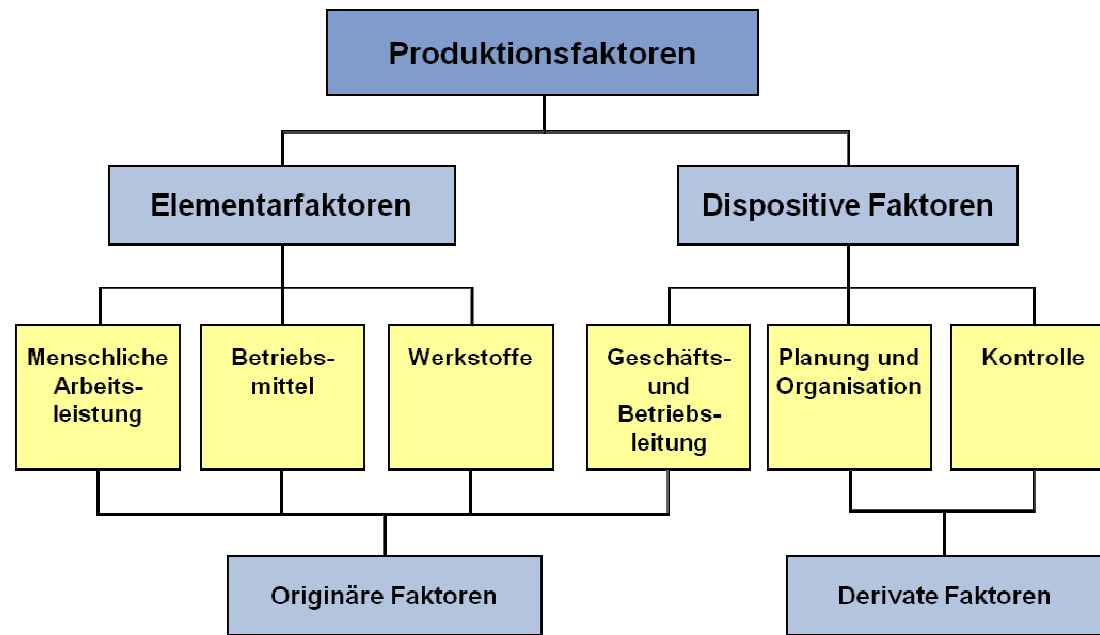

Seite 11, Abb. 7: Das System der betrieblichen Produktionsfaktoren

# KAPITEL A: GRUNDLAGEN DER BETRIEBSWIRTSCHAFTSLEHRE

## 2. WIRTSCHAFTSSYSTEME UND TRÄGER DER WIRTSCHAFT

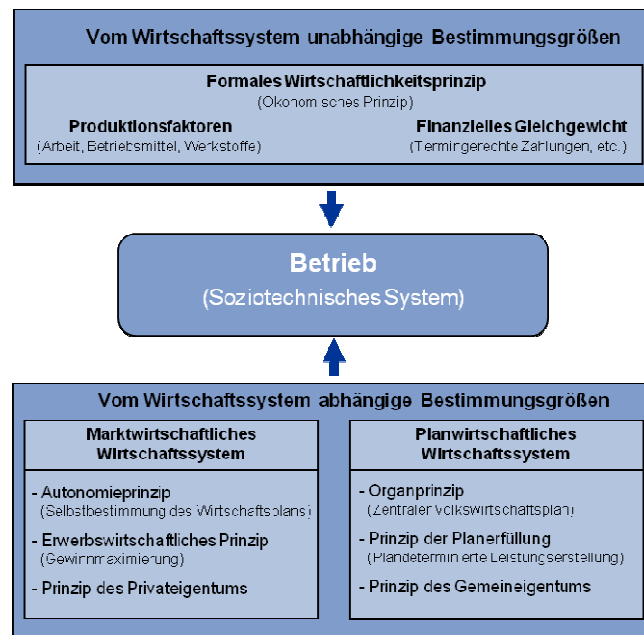

Seite 14, Abb. 8: Bestimmungsgrößen des Betriebes

# KAPITEL A: GRUNDLAGEN DER BETRIEBSWIRTSCHAFTSLEHRE

## 2. WIRTSCHAFTSSYSTEME UND TRÄGER DER WIRTSCHAFT

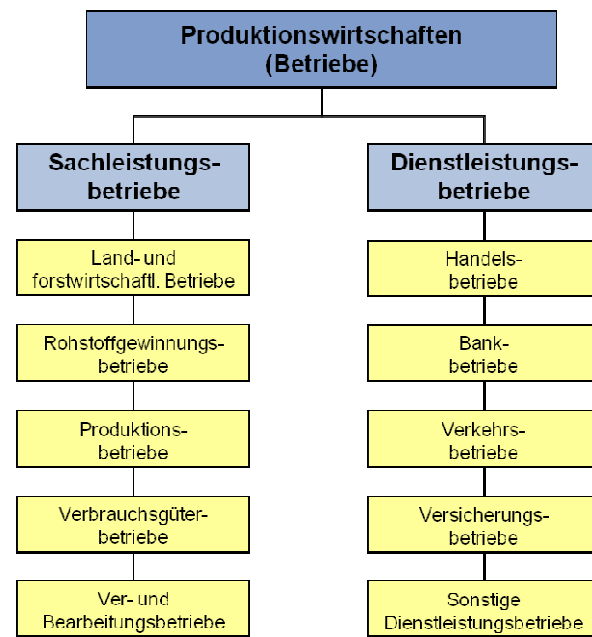

Seite 16, Abb. 9: Gliederung nach Wirtschaftszweigen

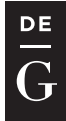

# KAPITEL A: GRUNDLAGEN DER BETRIEBSWIRTSCHAFTSLEHRE

## 2. WIRTSCHAFTSSYSTEME UND TRÄGER DER WIRTSCHAFT

| Anzahl der Unternehmen in Deutschland<br>nach Wirtschaftszweigen und Beschäftigungsgrößenklassen 2012 |                       |                                       |                |               |               |
|-------------------------------------------------------------------------------------------------------|-----------------------|---------------------------------------|----------------|---------------|---------------|
| Wirtschaftszweige                                                                                     | Anzahl<br>Unternehmen | In Betrieben mit...bis...Beschäftigte |                |               |               |
|                                                                                                       |                       | 0-9                                   | 10 - 49        | 50 - 249      | ≥ 250         |
| - Bergbau, Steine und Erden                                                                           | 2.712                 | 1.974                                 | 591            | 114           | 33            |
| - Verarbeitendes Gewerbe                                                                              | 261.528               | 192.927                               | 46.875         | 17.249        | 4.477         |
| - Energie- u. Wasserversorgung                                                                        | 76.212                | 69.995                                | 4.270          | 1.624         | 323           |
| - Baugewerbe                                                                                          | 394.915               | 357.349                               | 34.100         | 3.287         | 179           |
| - Handel und Verwaltung                                                                               | 761.69                | 671.811                               | 75.688         | 12.558        | 1.212         |
| - Verkehr und Lagerei                                                                                 | 133.709               | 108.877                               | 19.626         | 4.509         | 697           |
| - Information und Kommunikation                                                                       | 137.595               | 123.964                               | 10.411         | 2.764         | 456           |
| - Finanz- und Versicherungsdienste                                                                    | 86.022                | 76.905                                | 6.046          | 2.342         | 729           |
| - Grundstücks- und Wohnungswesen                                                                      | 326.308               | 322.320                               | 3.423          | 515           | 50            |
| - Erziehung und Unterricht                                                                            | 90.586                | 70.256                                | 17.140         | 2.775         | 415           |
| - Gesundheits- und Sozialwesen                                                                        | 249.460               | 204.709                               | 31.785         | 10.933        | 2.033         |
| - Sonstige                                                                                            | 1.361.101             | 1.239.204                             | 76.404         | 16.295        | 2.198         |
| <b>Unternehmen gesamt</b>                                                                             | <b>3.881.417</b>      | <b>3.467.291</b>                      | <b>326.359</b> | <b>74.965</b> | <b>12.802</b> |

Seite 17, Abb. 10: Anzahl der Unternehmen nach Wirtschaftszweigen  
(Vgl. Statistisches Bundesamt (Hrsg.): Statistisches Jahrbuch 2015, Wiesbaden 2015, S. 525)



# KAPITEL A: GRUNDLAGEN DER BETRIEBSWIRTSCHAFTSLEHRE

## 2. WIRTSCHAFTSSYSTEME UND TRÄGER DER WIRTSCHAFT

| Anzahl der Beschäftigten in Deutschland<br>nach Wirtschaftszweigen und Beschäftigungsgrößenklassen 2012 |                       |                                       |                  |                  |                  |
|---------------------------------------------------------------------------------------------------------|-----------------------|---------------------------------------|------------------|------------------|------------------|
| Wirtschaftszweige                                                                                       | Anzahl<br>Mitarbeiter | In Betrieben mit...bis...Beschäftigte |                  |                  |                  |
|                                                                                                         |                       | 0-9                                   | 10 - 49          | 50 - 249         | ≥ 250            |
| - Bergbau, Steine und Erden                                                                             | 64.601                | 4.651                                 | 11.963           | 10.552           | 37.435           |
| - Verarbeitendes Gewerbe                                                                                | 6.612.130             | 382.118                               | 1.009.077        | 1.845.002        | 3.375.933        |
| - Energie- u. Wasserversorgung                                                                          | 488.079               | 30.339                                | 95.503           | 161.808          | 200.429          |
| - Baugewerbe                                                                                            | 1.554.623             | 563.610                               | 622.643          | 293.402          | 74.968           |
| - Handel und Verwaltung                                                                                 | 4.311.592             | 1.044.421                             | 1.490.166        | 1.193.465        | 583.540          |
| - Verkehr und Lagerei                                                                                   | 1.510.315             | 180.143                               | 407.425          | 438.659          | 484.088          |
| - Information und Kommunikation                                                                         | 888.434               | 112.813                               | 216.585          | 269.670          | 289.366          |
| - Finanz- und Versicherungsdienste                                                                      | 1.000.492             | 118.668                               | 126.160          | 253.876          | 501.788          |
| - Grundstücks- und Wohnungswesen                                                                        | 235.402               | 99.813                                | 66.096           | 48.156           | 21.337           |
| - Erziehung und Unterricht                                                                              | 1.121.429             | 125.059                               | 335.809          | 264.348          | 396.213          |
| - Gesundheits- und Sozialwesen                                                                          | 3.775.652             | 609.204                               | 651.091          | 1.057.386        | 1.457.971        |
| - Sonstige                                                                                              | 5.632.665             | 1.033.058                             | 1.517.745        | 1.609.616        | 1.143.317        |
| <b>Beschäftigte gesamt</b>                                                                              | <b>27.195.414</b>     | <b>4.632.826</b>                      | <b>6.550.263</b> | <b>7.445.940</b> | <b>8.566.385</b> |

Seite 17, Abb. 11: Beschäftigte in Unternehmen nach Wirtschaftszweigen  
(Vgl. Statistisches Bundesamt (Hrsg.): Statistisches Jahrbuch 2015, Wiesbaden 2015, S. 525)

# KAPITEL A: GRUNDLAGEN DER BETRIEBSWIRTSCHAFTSLEHRE

## 2. WIRTSCHAFTSSYSTEME UND TRÄGER DER WIRTSCHAFT

| Merkmale       |                           | Aufgaben                                                                                                                                                                                                                    | Formen                                                                                                                                                                                                                                                                             |
|----------------|---------------------------|-----------------------------------------------------------------------------------------------------------------------------------------------------------------------------------------------------------------------------|------------------------------------------------------------------------------------------------------------------------------------------------------------------------------------------------------------------------------------------------------------------------------------|
| Arten          |                           |                                                                                                                                                                                                                             |                                                                                                                                                                                                                                                                                    |
| Staatliche NPO | Gemeinwirtschaftliche NPO | <ul style="list-style-type: none"> <li>– Erfüllung demokratisch festgelegter öffentlicher Aufgaben (auf Bundes-, Kantons-, Gemeindeebene)</li> <li>– Erbringung konkreter Leistungen für die Bürger (Mitglieder)</li> </ul> | <ul style="list-style-type: none"> <li>– Öffentliche Verwaltungen</li> <li>– Öffentliche Betriebe: <ul style="list-style-type: none"> <li>- Verkehr, Energie</li> <li>- Spital, Heim, Anstalt</li> <li>- Schule, Uni, Museen</li> <li>- Theater, Bibliothek</li> </ul> </li> </ul> |
|                | Wirtschaftliche NPO       | <ul style="list-style-type: none"> <li>– Förderung der wirtschaftlichen Interessen der Mitglieder</li> </ul>                                                                                                                | <ul style="list-style-type: none"> <li>– Wirtschaftsverband</li> <li>– Arbeitnehmerorganisation</li> <li>– Berufsverband</li> <li>– Konsumentenorganisation</li> <li>– Genossenschaft</li> </ul>                                                                                   |
| Private NPO    | Soziokulturelle NPO       | <ul style="list-style-type: none"> <li>– Gemeinsame Aktivitäten im Rahmen kultureller, gesellschaftlicher Interessen, Bedürfnisse der Mitglieder</li> </ul>                                                                 | <ul style="list-style-type: none"> <li>– Sportvereine</li> <li>– Freizeitvereine</li> <li>– Kirche, Sekte</li> <li>– Spiritistische Zirkel</li> </ul>                                                                                                                              |
|                | Politische NPO            | <ul style="list-style-type: none"> <li>– Gemeinsame Aktivitäten zur Bearbeitung und Durchsetzung politischer (ideeller) Interessen und Wertvorstellungen</li> </ul>                                                         | <ul style="list-style-type: none"> <li>– Politische Partei</li> <li>– Natur-, Heimat-, Umweltschutzorganisationen</li> <li>– Politisch orientierte Vereine</li> <li>– Organisierte Bürgerinitiative</li> </ul>                                                                     |
|                | Karitative NPO            | <ul style="list-style-type: none"> <li>– Erbringung karitativer Unterstützungsleistungen an bedürftige Bevölkerungskreise (Wohltätigkeit, Gemeinnützigkeit)</li> </ul>                                                      | <ul style="list-style-type: none"> <li>– Hilfsorganisationen für Ältere, Behinderte, Geschädigte, Arme, Benachteiligte, Süchtige</li> <li>– Entwicklungshilfe-Organisationen</li> <li>– Selbsthilfegruppen</li> </ul>                                                              |

Seite 18, Abb. 12: Nonprofit-Organisationen



# KAPITEL A: GRUNDLAGEN DER BETRIEBSWIRTSCHAFTSLEHRE

## 2. WIRTSCHAFTSSYSTEME UND TRÄGER DER WIRTSCHAFT

| Unternehmen und Beschäftigte in der Bundesrepublik nach Größenklassen 2012 |                      |                |                        |                |
|----------------------------------------------------------------------------|----------------------|----------------|------------------------|----------------|
| Zahl der Beschäftigten                                                     | Zahl der Unternehmen | Anteil in %    | Beschäftigte insgesamt | Anteil in %    |
| 0 - 9                                                                      | 3.467.291            | 89,4 %         | 4.632.826              | 17,0 %         |
| 10 - 49                                                                    | 326.359              | 8,4 %          | 6.550.263              | 24,1 %         |
| 50 - 249                                                                   | 74.965               | 1,9 %          | 7.445.940              | 27,4 %         |
| 250 und mehr                                                               | 12.802               | 0,3 %          | 8.566.385              | 31,5 %         |
| <b>Insgesamt</b>                                                           | <b>3.881.417</b>     | <b>100,0 %</b> | <b>27.195.414</b>      | <b>100,0 %</b> |

Seite 20, Abb. 13: Unternehmen und Beschäftigte nach Größenklassen  
(Vgl. Statistisches Bundesamt (Hrsg.): Statistisches Jahrbuch 2015, Wiesbaden 2015, S. 525)





# KAPITEL A: GRUNDLAGEN DER BETRIEBSWIRTSCHAFTSLEHRE

## 2. WIRTSCHAFTSSYSTEME UND TRÄGER DER WIRTSCHAFT

| Größeneinteilung von Betrieben (EU-Definition) |              |               |           |
|------------------------------------------------|--------------|---------------|-----------|
| Betriebsgröße                                  | Beschäftigte | Bilanzsumme € | Umsatz €  |
| Kleinstbetriebe                                | < 10         | ≤ 2 Mio.      | ≤ 2 Mio.  |
| Kleine Betriebe                                | < 50         | ≤ 10 Mio.     | ≤ 10 Mio. |
| Mittlere Betriebe                              | < 250        | ≤ 50 Mio.     | ≤ 43 Mio. |

| Größeneinteilung von Betrieben (Statistisches Bundesamt) |              |                 |
|----------------------------------------------------------|--------------|-----------------|
| Größenklasse                                             | Beschäftigte | Jahresumsatz    |
| Kleinstbetriebe                                          | bis 9        | bis 2 Mill. €   |
| Kleine Betriebe                                          | bis 49       | bis 10 Mill. €  |
| Mittlere Betriebe                                        | bis 249      | bis 50 Mill. €  |
| Großbetriebe                                             | über 249     | über 50 Mill. € |

Seite 20, Abb. 14: Unternehmen und Beschäftigte nach Größenklassen

(Vgl. Merkblatt KMU-Definition der EU w1990810-04.03.2015 mit einem Prüfschema für kleine und mittlere Unternehmen (KMU) und Statistisches Jahrbuch 2015, Wiesbaden 2015, S. 528)

# KAPITEL A: GRUNDLAGEN DER BETRIEBSWIRTSCHAFTSLEHRE

## 2. WIRTSCHAFTSSYSTEME UND TRÄGER DER WIRTSCHAFT

| Merkmale                                | Kleine und mittlere Unternehmen                                  | Großunternehmen                                                         |
|-----------------------------------------|------------------------------------------------------------------|-------------------------------------------------------------------------|
| Unternehmensführung                     | Eigentümer-Unternehmer                                           | Manager                                                                 |
| Stellvertreter- und Nachfolgeregelungen | Kaum vorhanden                                                   | In aller Regel geplant                                                  |
| Entscheidungs- und Informationswege     | Schnelle Wege aufgrund flacher Hierarchien; größere Flexibilität | Längere Wege aufgrund vor-geschriebener Abläufe; geringere Flexibilität |
| Informelle Strukturen                   | Große Bedeutung                                                  | Geringe Bedeutung                                                       |
| Mitarbeiterpotenzial                    | Meist breites Fachwissen vorhanden                               | Starke Tendenz zur Spezialisierung                                      |
| Produktionsstruktur                     | Arbeitsintensiv                                                  | Kapitalintensiv                                                         |
| Finanzierungsmöglichkeiten              | Begrenzte finanzielle Ressourcen                                 | Größere finanzielle Ressourcen                                          |
| Zugang zum Kapitalmarkt                 | Schwieriger Zugang, daher begrenzte Finanzierungsmöglichkeiten   | Leichter Zugang, daher vielfältige Finanzierungsmöglichkeiten           |

Seite 21, Abb. 15: Unterscheidung nach Unternehmensmerkmalen von Betriebsgrößen

### **3. DIE BETRIEBSWIRTSCHAFTSLEHRE ALS WISSENSCHAFT**

3.1 EINGLIEDERUNG IN DAS SYSTEM DER WISSENSCHAFTEN

3.2 DAS ERKENNTNIS- UND DAS ERFAHRUNGSOBJEKT DER  
BETRIEBSWIRTSCHAFTSLEHRE

3.3 ERKENNTNISZIELE DER BETRIEBSWIRTSCHAFTSLEHRE

3.4 DIE GLIEDERUNG DER BETRIEBSWIRTSCHAFTSLEHRE

3.5 DIE VERNETZUNG DER BETRIEBSWIRTSCHAFTSLEHRE MIT DEN  
WISSENSCHAFTLICHEN NACHBARDISZIPLINEN

## KAPITEL A: GRUNDLAGEN DER BETRIEBSWIRTSCHAFTSLEHRE

### 3. DIE BETRIEBSWIRTSCHAFTSLEHRE ALS WISSENSCHAFT

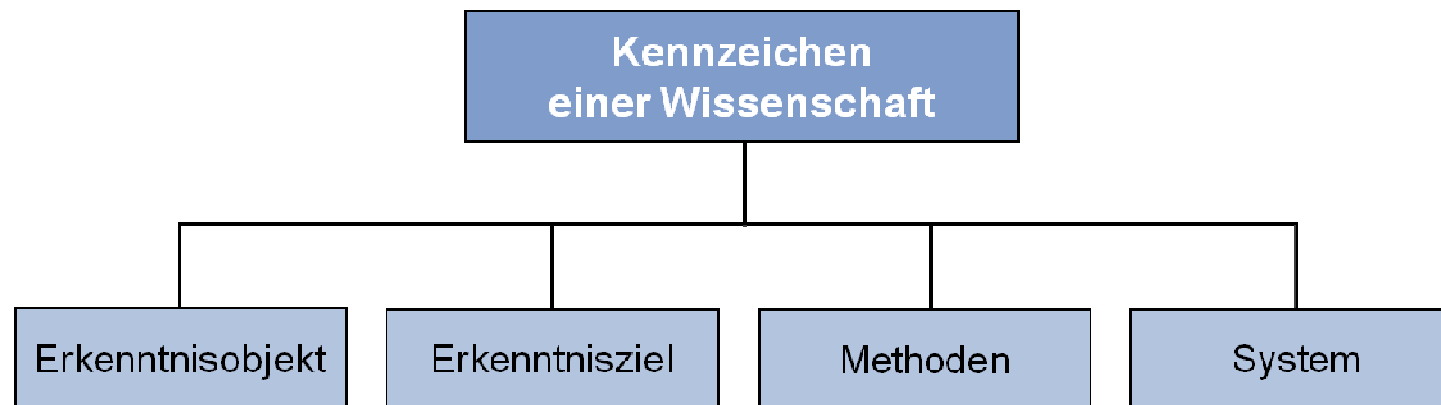

Seite 22, Abb. 16: Kennzeichen einer Wissenschaft

# KAPITEL A: GRUNDLAGEN DER BETRIEBSWIRTSCHAFTSLEHRE

## 3. DIE BETRIEBSWIRTSCHAFTSLEHRE ALS WISSENSCHAFT

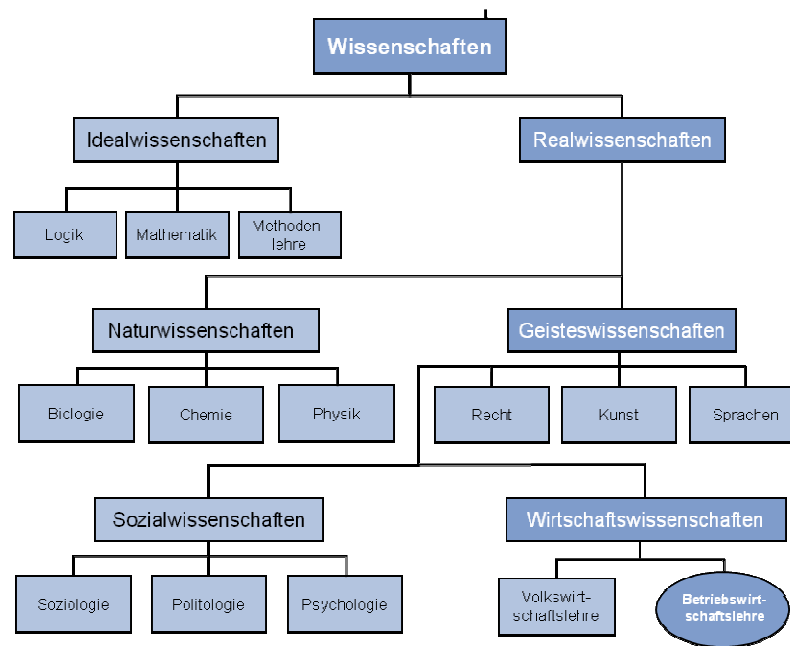

Seite 23, Abb. 17: Die Betriebswirtschaftslehre im System der Wissenschaften

# KAPITEL A: GRUNDLAGEN DER BETRIEBSWIRTSCHAFTSLEHRE

## 3. DIE BETRIEBSWIRTSCHAFTSLEHRE ALS WISSENSCHAFT

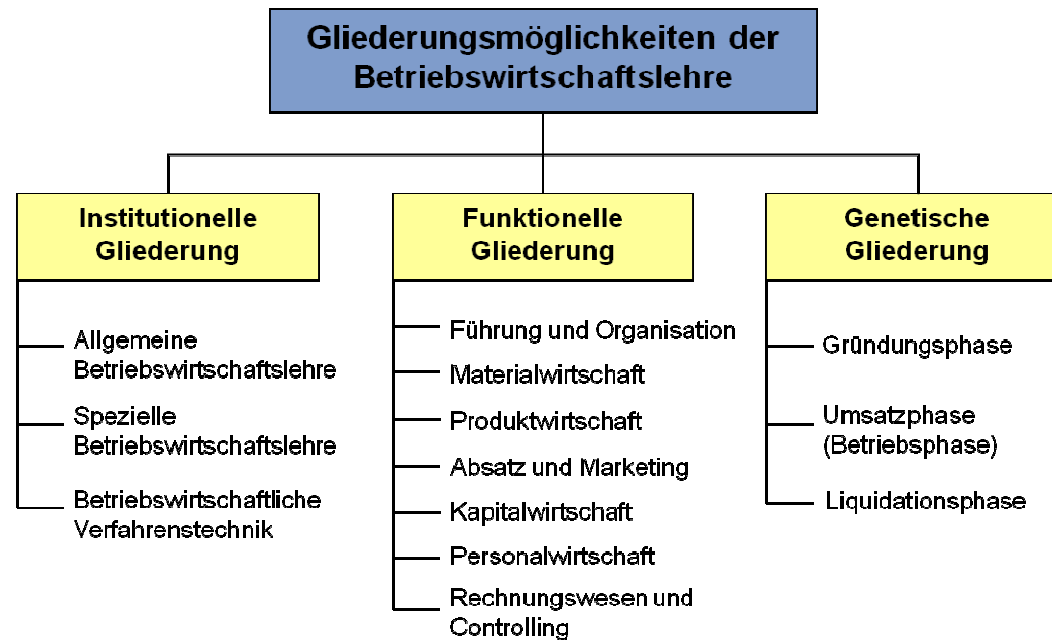

Seite 29, Abb. 18: Gliederung der Betriebswirtschaftslehre

## **4. BETRIEBSWIRTSCHAFTLICHE ZIELKONZEPTIONEN**

4.1 DIE ZIELINHALTE

4.2 DAS ZIELSYSTEM

4.3 ZIELBILDUNG UND ZIELBEZIEHUNGEN

4.4 DAS ERWERBSWIRTSCHAFTLICHE PRINZIP

## KAPITEL A: GRUNDLAGEN DER BETRIEBSWIRTSCHAFTSLEHRE

### 4. BETRIEBSWIRTSCHAFTLICHE ZIELKONZEPTIONEN

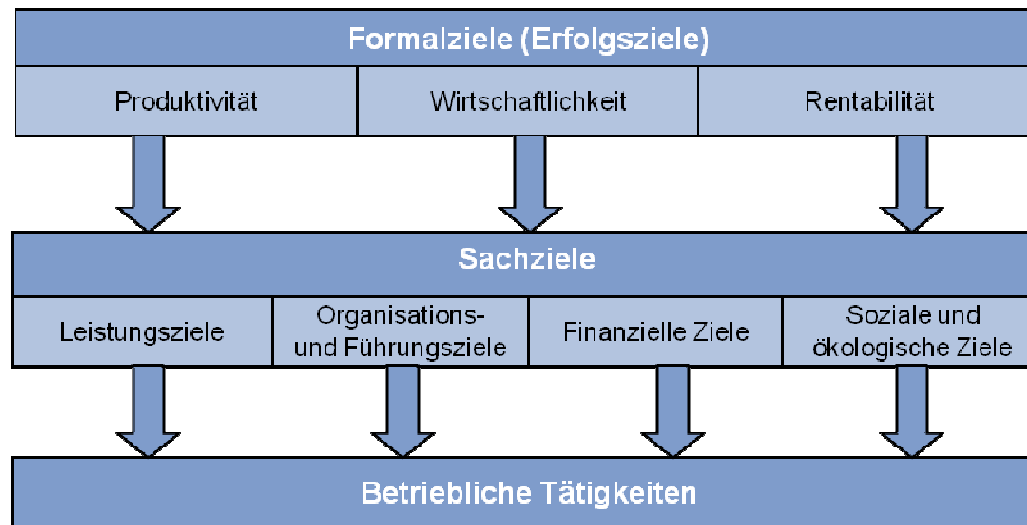

Seite 34, Abb. 19: Betriebswirtschaftliche Zielkategorien  
(in Anlehnung an Thommen, J.- P.: Managementorientierte Betriebswirtschaftslehre, Zürich 2000, S. 96)



# KAPITEL A: GRUNDLAGEN DER BETRIEBSWIRTSCHAFTSLEHRE

## 4. BETRIEBSWIRTSCHAFTLICHE ZIELKONZEPTIONEN

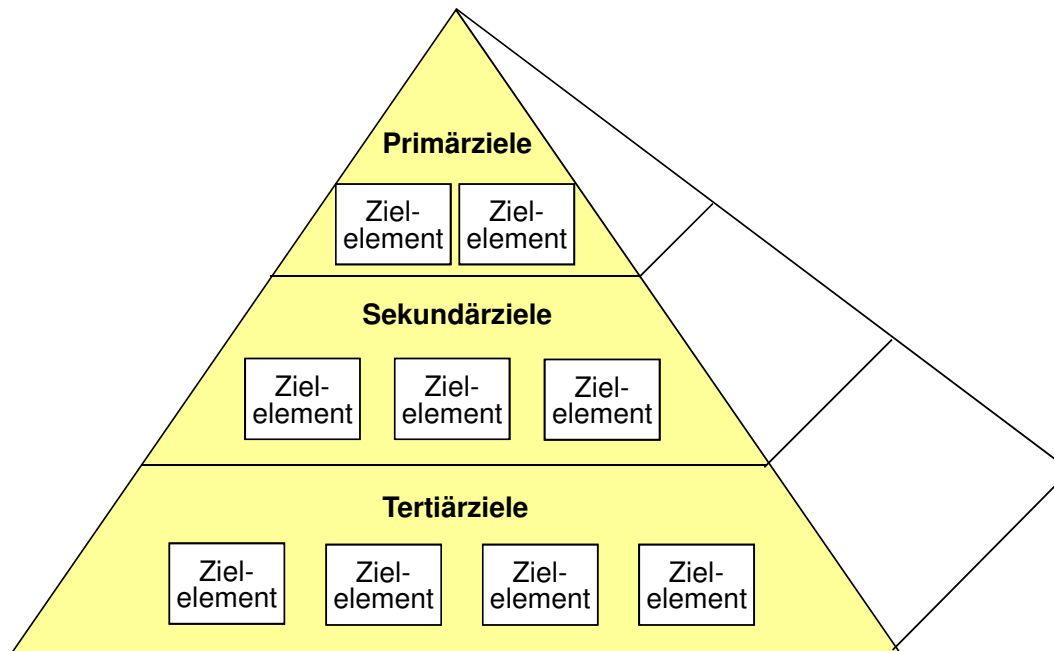

Seite 35, Abb. 20: Struktur des Zielsystems

# KAPITEL A: GRUNDLAGEN DER BETRIEBSWIRTSCHAFTSLEHRE

## 4. BETRIEBSWIRTSCHAFTLICHE ZIELKONZEPTIONEN

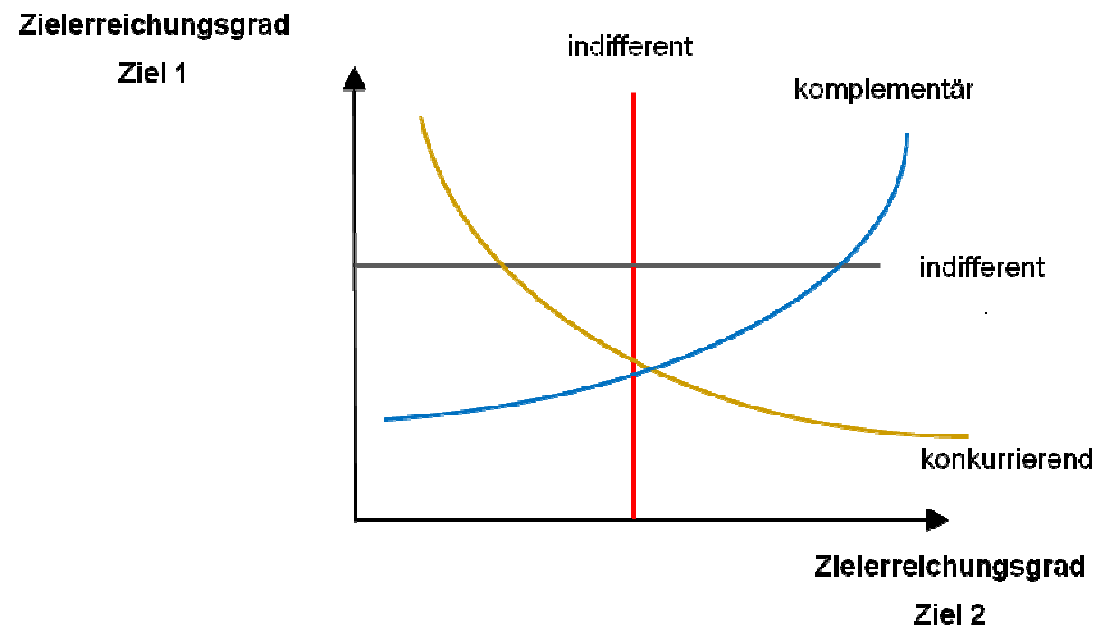

Seite 37, Abb. 21: Betriebswirtschaftliche Zielkategorien

# KAPITEL A: GRUNDLAGEN DER BETRIEBSWIRTSCHAFTSLEHRE

## 4. BETRIEBSWIRTSCHAFTLICHE ZIELKONZEPTIONEN

| Kennzahlen           | Alternative 1   | Alternative 2   |
|----------------------|-----------------|-----------------|
| - Ausbringung        | 1.000.000 Stück | 1.500.000 Stück |
| - Umsatz             | 10.000.000 €    | 15.000.000 €    |
| - Kosten             | 8.000.000 €     | 12.750.000 €    |
| - Gewinn             | 2.000.000 €     | 2.250.000 €     |
| - Umsatzrentabilität | 20,0 %          | 15,0 %          |

Seite 40, Abb. 22: Beispiel Umsatzrentabilität

## **5. METHODEN UND MODELLE DER BETRIEBSWIRTSCHAFTSLEHRE**

### 5.1 METHODEN DER BETRIEBSWIRTSCHAFTSLEHRE

### 5.2 BETRIEBSWIRTSCHAFTLICHE MODELLE

## KAPITEL A: GRUNDLAGEN DER BETRIEBSWIRTSCHAFTSLEHRE

### 5. METHODEN UND MODELLE DER BETRIEBSWIRTSCHAFTSLEHRE

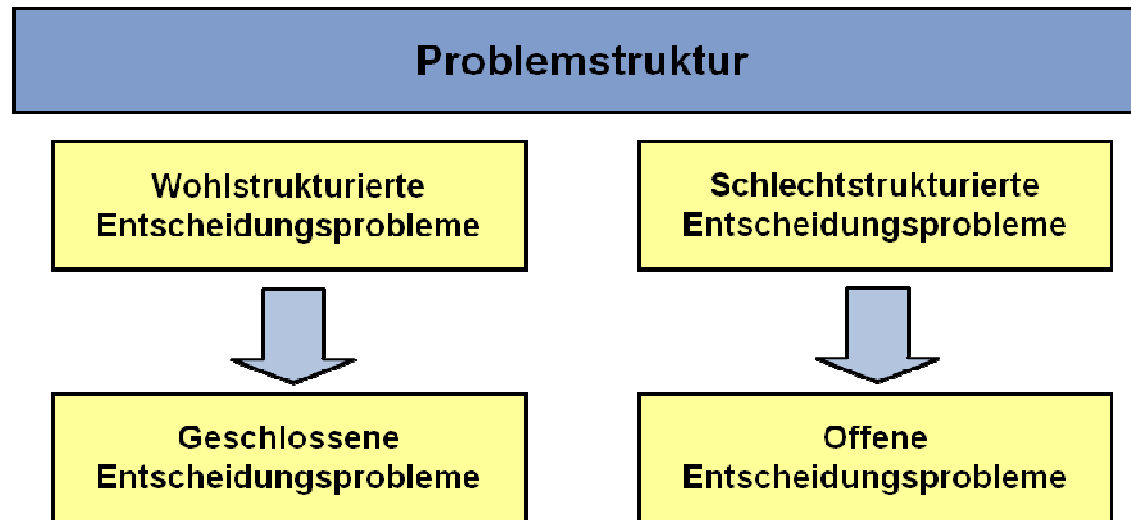

Seite 45, Abb. 23: Entscheidungsmodelle

## 6. THEORETISCHE ANSATZPUNKTE DER BETRIEBSWIRTSCHAFTSLEHRE

6.1 HISTORISCHER RÜCKBLICK

6.2 DER FAKTORTHEORETISCHE ANSATZ NACH ERICH GUTENBERG

6.3 DER ENTSCHEIDUNGSTHEORETISCHE ANSATZ NACH EDMUND HEINEN

6.4 DER SYSTEMORIENTIERTE ANSATZ NACH HANS ULRICH

6.5 DER ÖKOLOGIEORIENTIERTE ANSATZ

6.6 DER INSTITUTIONENÖKONOMISCHE ANSATZ

6.7 WEITERE THEORETISCHE ANSÄTZE

## KAPITEL A: GRUNDLAGEN DER BETRIEBSWIRTSCHAFTSLEHRE

### 6. THEORETISCHE ANSATZPUNKTE DER BETRIEBSWIRTSCHAFTSLEHRE

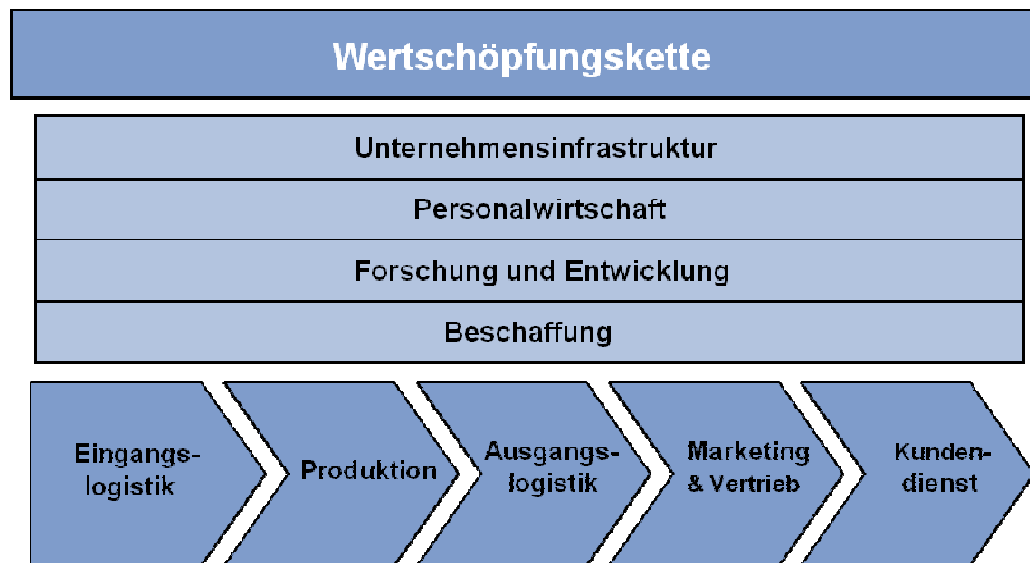

Seite 55, Abb. 24: Die Wertschöpfungskette nach Porter  
(in Anlehnung an Jost, P.-J.: Der Transaktionskostenansatz in der Betriebswirtschaftslehre, Stuttgart 2001, S. 305)

*Jung: Allgemeine Betriebswirtschaftslehre. De Gruyter Oldenbourg 2016. ISBN 978-3-486-76376-8*

# KAPITEL A: GRUNDLAGEN DER BETRIEBSWIRTSCHAFTSLEHRE

## 6. THEORETISCHE ANSATZPUNKTE DER BETRIEBSWIRTSCHAFTSLEHRE

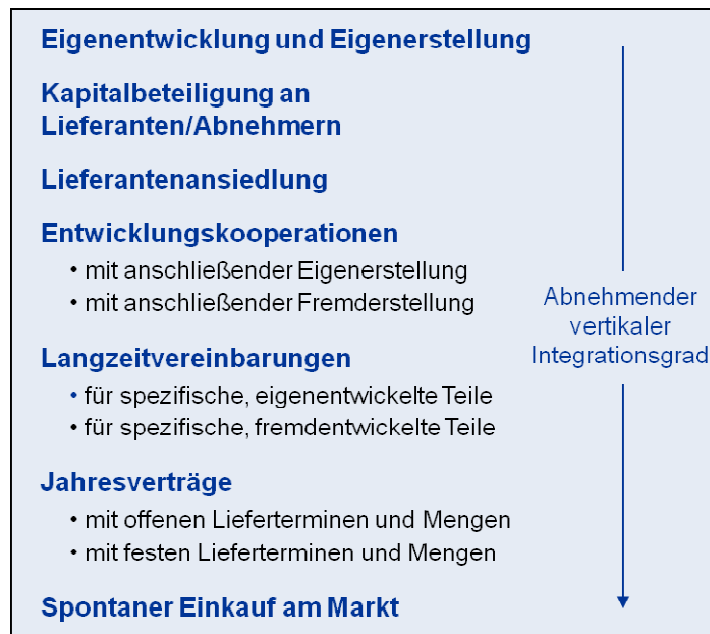

Seite 56, Abb. 25: Beispiele für Entscheidungsalternativen der Fertigungsoptimierung  
(in Anlehnung an Picot, A./Dietl. H./Franck, E.: Organisation. Eine ökonomische Perspektive, 3. Aufl.,  
Stuttgart 2002, S. 82)



## KAPITEL A: GRUNDLAGEN DER BETRIEBSWIRTSCHAFTSLEHRE

### 6. THEORETISCHE ANSATZPUNKTE DER BETRIEBSWIRTSCHAFTSLEHRE

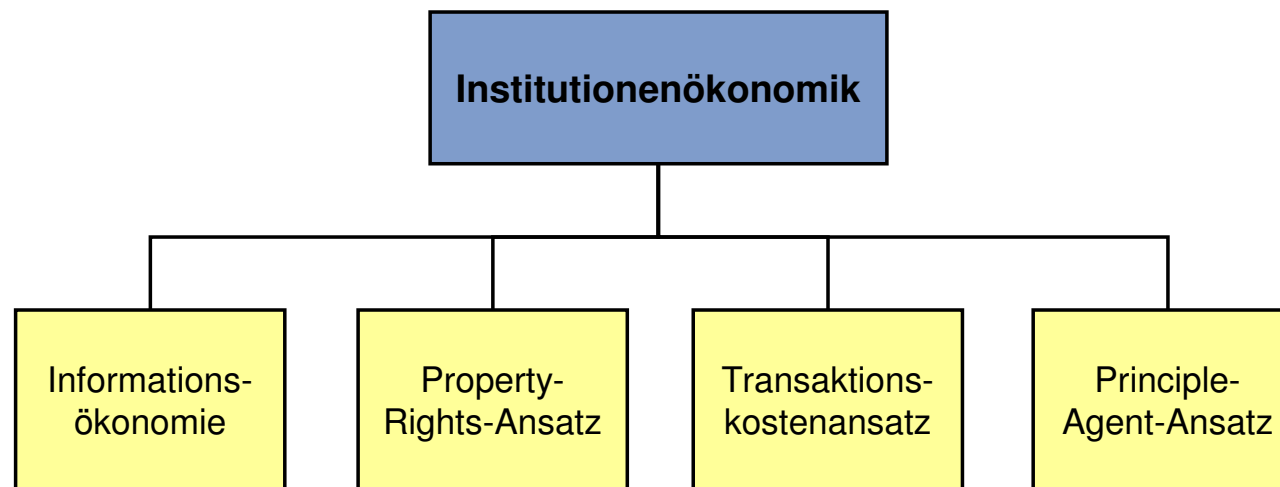

Seite 56, Abb. 26: Teilgebiete der Institutionenökonomik  
(in Anlehnung an Terberger, E.: Neoinstitutionalistische Ansätze. Entstehung und Wandel,  
Anspruch und Wirklichkeit, Wiesbaden 1994, S. 81)

*Jung: Allgemeine Betriebswirtschaftslehre. De Gruyter Oldenbourg 2016. ISBN 978-3-486-76376-8*

## KAPITEL A: GRUNDLAGEN DER BETRIEBSWIRTSCHAFTSLEHRE

### 6. THEORETISCHE ANSATZPUNKTE DER BETRIEBSWIRTSCHAFTSLEHRE

| Theoretischer Ansatz         | Hauptvertreter                        | Leitidee                                                                  |
|------------------------------|---------------------------------------|---------------------------------------------------------------------------|
| Arbeitsorientierter Ansatz   | Gewerkschaften                        | Die Arbeitnehmerinteressen stehen im Mittelpunkt                          |
| Konflikttheoretischer Ansatz | Ralf Dahrendorf                       | Konflikte als Auslöser von Evolutionsprozessen                            |
| Situativer Ansatz            | Alfred Kieser/<br>Herbert Kubicek     | Situationsadäquate Gestaltung von Organisations- und Führungsprinzipien   |
| Marketingansatz              | Heribert Meffert/<br>Robert Nieschlag | Steuerung des Unternehmens durch die Markt- und Kundenorientierung        |
| EDV-orientierter Ansatz      | August-Wilhelm Scheer                 | Einsatz der Informationstechnologien für betriebswirtschaftliche Aufgaben |

Seite 58, Abb. 27: Weitere theoretische Ansätze der Betriebswirtschaftslehre
