# Supplementary material
Source: publisher site journal article supplement (https://www.degruyterbrill.com/publication/isbn/9783486989434/downloadAsset/9783486989434_Folien--de.zip)
Supplement: Supplementary file 2 [file Teil_B_ABWL.pdf › Teil_B_ABWL.pdf]

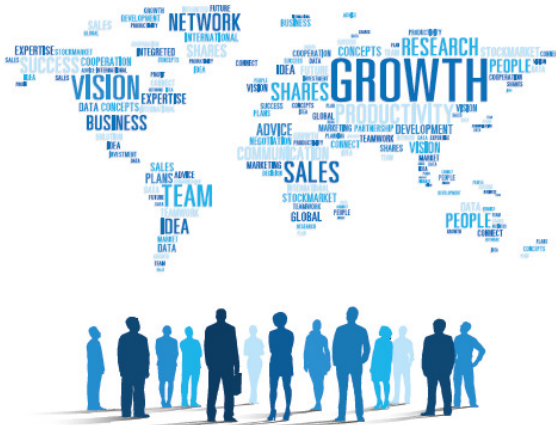

## KAPITEL B: KONSTITUTIVE ENTSCHEIDUNGEN DES BETRIEBES

2. DIE BETRIEBLICHE STANDORTWAHL
3. DER RECHTLICHE AUFBAU DER BETRIEBE
4. DER ZUSAMMENSCHLUSS VON UNTERNEHMEN
5. PERSPEKTIVEN DER WIRTSCHAFT FÜR DEN EUROPÄISCHEN BINNENMARKT

## 2. DIE BETRIEBLICHE STANDORTWAHL

2.1 DIE BEDEUTUNG DES BETRIEBLICHEN STANDORTES

2.2 DIE BETRIEBLICHEN STANDORTFAKTOREN

2.3 ENTSCHEIDUNGSMODELLE ZUR STANDORTWAHL

2.4 INTERNATIONALE STANDORTPOLITIK

## KAPITEL B: KONSTITUTIVE ENTSCHEIDUNGEN DES BETRIEBS

### 2. DIE BETRIEBLICHE STANDORTWAHL

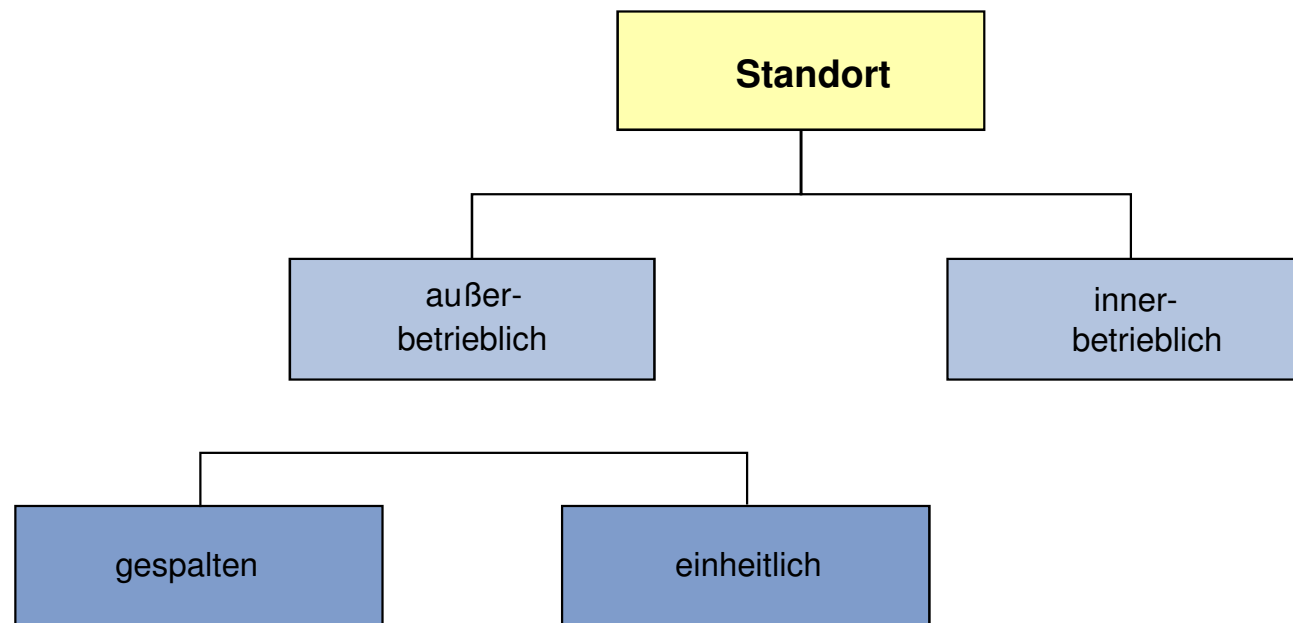

Seite 64, Abb. 1: Formen des Standortes

## KAPITEL B: KONSTITUTIVE ENTSCHEIDUNGEN DES BETRIEBS

### 2. DIE BETRIEBLICHE STANDORTWAHL

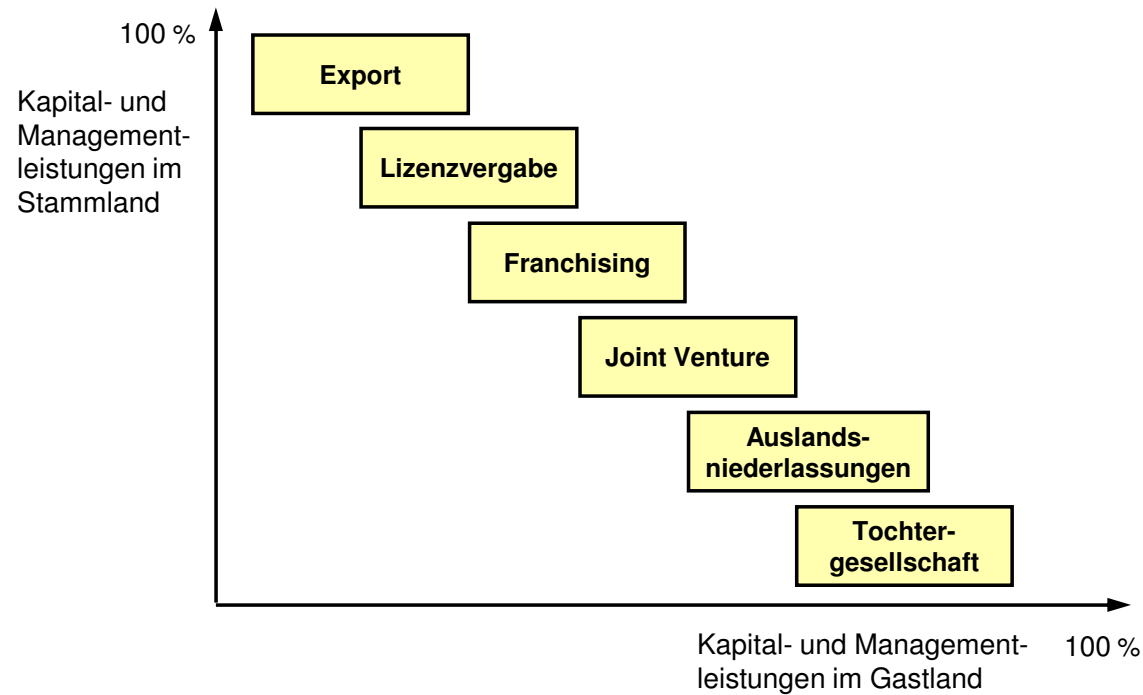

Seite 66, Abb. 2: Internationalisierungsstufen  
(in Anlehnung an Schierenbeck, H.: Grundzüge der Betriebswirtschaftslehre, 16.Aufl.,  
München / Wien 2003, S. 44)

## KAPITEL B: KONSTITUTIVE ENTSCHEIDUNGEN DES BETRIEBS

### 2. DIE BETRIEBLICHE STANDORTWAHL

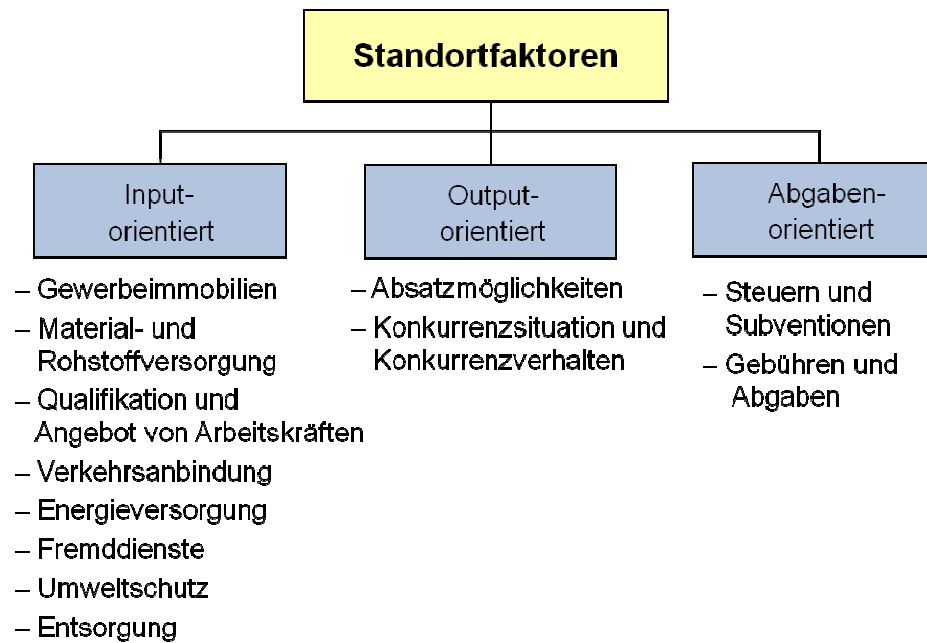

Seite 67, Abb. 3: Modell der betrieblichen Standortfaktoren

## KAPITEL B: KONSTITUTIVE ENTSCHEIDUNGEN DES BETRIEBS

### 2. DIE BETRIEBLICHE STANDORTWAHL

| Standortfaktoren - Rangfolge                                                                                                                                                                                                                            |                                                                                                                                                                                                    |                                                                                                                                                |
|---------------------------------------------------------------------------------------------------------------------------------------------------------------------------------------------------------------------------------------------------------|----------------------------------------------------------------------------------------------------------------------------------------------------------------------------------------------------|------------------------------------------------------------------------------------------------------------------------------------------------|
| Die wichtigsten Faktoren                                                                                                                                                                                                                                | Auch wichtige Faktoren                                                                                                                                                                             | Weniger wichtige Faktoren                                                                                                                      |
| <ul style="list-style-type: none"> <li>- Mitarbeiterqualifikation</li> <li>- Stückkosten</li> <li>- Personalkosten</li> <li>- Arbeitsproduktivität</li> <li>- Direktlohn</li> <li>- Politische Stabilität</li> <li>- Unternehmensbesteuerung</li> </ul> | <ul style="list-style-type: none"> <li>- Infrastruktur</li> <li>- Behördliche Vorschriften</li> <li>- Arbeitszeit</li> <li>- Betriebsnutzungszeit</li> <li>- Energiekosten</li> <li>...</li> </ul> | <ul style="list-style-type: none"> <li>- Wechselkurse</li> <li>- Kapitalbeschaffung</li> <li>- Nähe zum Vorlieferanten</li> <li>...</li> </ul> |

Seite 67, Abb. 4: Rangfolge der Standortfaktoren bei Industriebetrieben

## KAPITEL B: KONSTITUTIVE ENTSCHEIDUNGEN DES BETRIEBS

### 2. DIE BETRIEBLICHE STANDORTWAHL

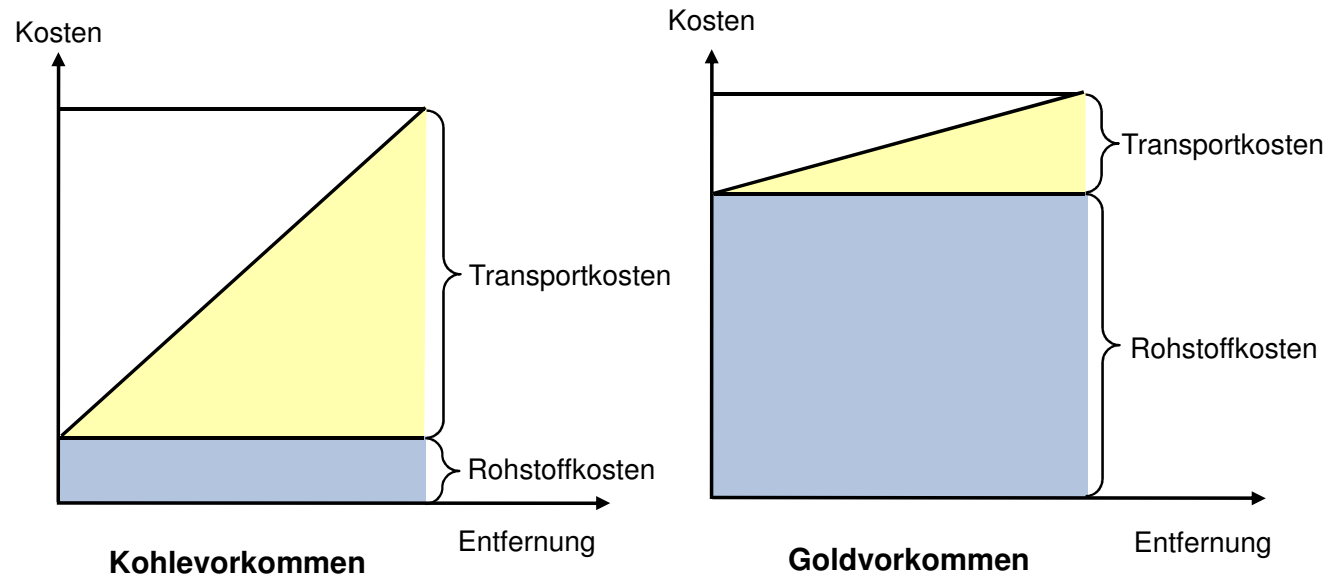

Seite 69, Abb. 5: Beispiel für Gewichtsverlustmaterial Stahlerzeugung (Kohle)/  
Beispiel für Reingewichtsmaterial Halbleiterfertigung (Kontaktmaterial Gold)



## KAPITEL B: KONSTITUTIVE ENTSCHEIDUNGEN DES BETRIEBS

### 2. DIE BETRIEBLICHE STANDORTWAHL

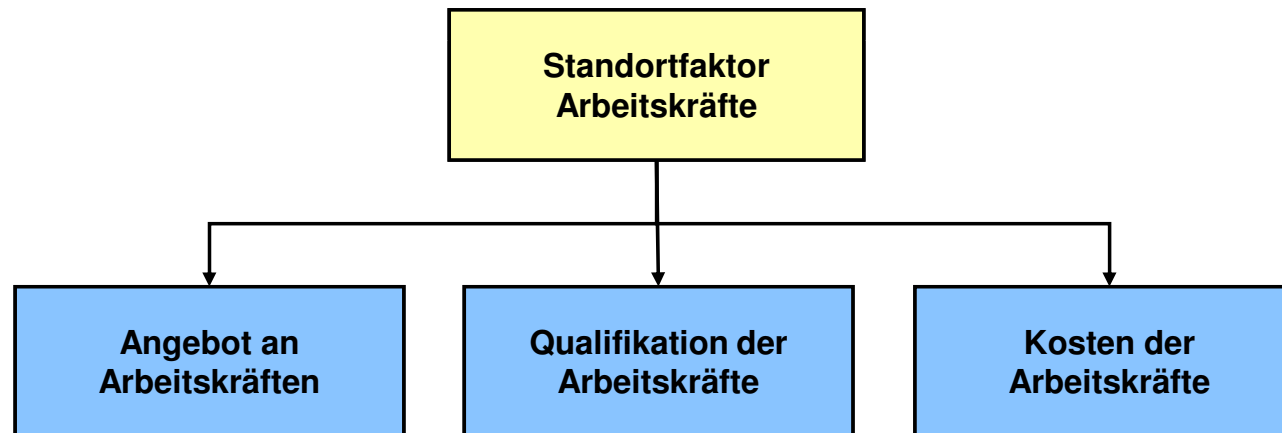

Seite 70, Abb. 6: Kosten des Faktors Arbeit

## KAPITEL B: KONSTITUTIVE ENTSCHEIDUNGEN DES BETRIEBS

### 2. DIE BETRIEBLICHE STANDORTWAHL

| Struktur der industriellen Arbeitskosten im Jahr 2013 |               |               |                      |                          |                    |
|-------------------------------------------------------|---------------|---------------|----------------------|--------------------------|--------------------|
| Länder                                                | Arbeitskosten | Zerlegung 1   |                      | Zerlegung 2              |                    |
|                                                       |               | Direktentgelt | Personalzusatzkosten | Bruttolöhne u. -gehälter | Sozialaufwendungen |
| Norwegen                                              | 56,16         | 36,18         | 19,98                | 43,92                    | 12,24              |
| Schweiz                                               | 48,95         | 29,80         | 19,15                | 38,88                    | 10,07              |
| Belgien                                               | 42,65         | 21,39         | 21,26                | 27,85                    | 14,80              |
| Schweden                                              | 42,19         | 24,27         | 17,19                | 28,74                    | 13,45              |
| Dänemark                                              | 41,29         | 29,98         | 11,31                | 36,02                    | 5,27               |
| Deutschland (West)                                    | 38,77         | 21,99         | 16,77                | 30,32                    | 8,45               |
| Deutschland                                           | 36,77         | 21,00         | 15,78                | 28,79                    | 7,98               |
| Frankreich                                            | 36,09         | 19,14         | 17,28                | 24,39                    | 12,00              |
| Niederlande                                           | 34,45         | 19,46         | 14,99                | 26,24                    | 8,20               |
| Österreich                                            | 34,41         | 17,80         | 16,50                | 25,12                    | 9,29               |
| Irland                                                | 30,91         | 20,28         | 10,63                | 25,57                    | 5,34               |
| Italien                                               | 27,61         | 14,59         | 13,02                | 19,70                    | 7,91               |
| Kanada                                                | 27,39         | 19,06         | 8,32                 | 21,75                    | 5,63               |
| USA                                                   | 25,93         | 17,39         | 8,55                 | 19,92                    | 6,01               |
| Großbritannien                                        | 24,11         | 17,25         | 7,16                 | 20,51                    | 3,90               |
| Deutschland (Ost)                                     | 23,93         | 14,60         | 9,33                 | 18,95                    | 4,98               |
| Japan                                                 | 23,34         | 13,03         | 10,31                | 18,46                    | 4,89               |
| Spanien                                               | 22,68         | 12,16         | 10,53                | 16,66                    | 6,02               |
| Griechenland                                          | 14,02         | 8,12          | 5,91                 | 10,73                    | 3,29               |
| Portugal                                              | 10,03         | 6,43          | 4,41                 | 8,58                     | 2,25               |
| Ungarn                                                | 7,61          | 4,41          | 3,20                 | 5,90                     | 1,71               |
| Polen                                                 | 7,06          | 4,73          | 2,32                 | 5,76                     | 1,30               |
| Rumänien                                              | 3,91          | 2,59          | 1,32                 | 3,02                     | 0,89               |
| Bulgarien                                             | 2,97          | 2,14          | 0,82                 | 2,47                     | 0,50               |

Seite 71, Abb. 7: Stundenlöhne in der verarbeitenden Industrie (Stand: 2013)  
 (Vgl. Institut der deutschen Wirtschaft, Köln: Trends. Industrielle Arbeitskosten im internationalen Vergleich, Heft 4/2014, S. 8)

Jung: Allgemeine Betriebswirtschaftslehre. De Gruyter Oldenbourg 2016. ISBN 978-3-486-76376-8

## KAPITEL B: KONSTITUTIVE ENTSCHEIDUNGEN DES BETRIEBS

### 2. DIE BETRIEBLICHE STANDORTWAHL

| Durchschnittliche Arbeitsstunden pro Jahr und Person in<br>Beschäftigung |         |                      |         |
|--------------------------------------------------------------------------|---------|----------------------|---------|
| Griechenland                                                             | 2.034 h | Vereintes Königreich | 1.654 h |
| Russland                                                                 | 1.982 h | Schweiz              | 1.619 h |
| USA                                                                      | 1.790 h | Österreich           | 1.576 h |
| Italien                                                                  | 1.752 h | Frankreich           | 1.479 h |
| Japan                                                                    | 1.745 h | Deutschland          | 1.393 h |
| Spanien                                                                  | 1.666 h | Niederlande          | 1.384 h |

Seite 72, Abb. 8: Jahresarbeitszeiten wichtiger Industriestaaten weltweit 2012  
 (Quelle OECD, Stand Dezember 2012. Die Jahres-Sollarbeitszeit errechnet sich aus der Wochenarbeitszeit  
unter Abzug der Urlaubs- und Feiertage.)

*Jung: Allgemeine Betriebswirtschaftslehre. De Gruyter Oldenbourg 2016. ISBN 978-3-486-76376-8*

## KAPITEL B: KONSTITUTIVE ENTSCHEIDUNGEN DES BETRIEBS

### 2. DIE BETRIEBLICHE STANDORTWAHL

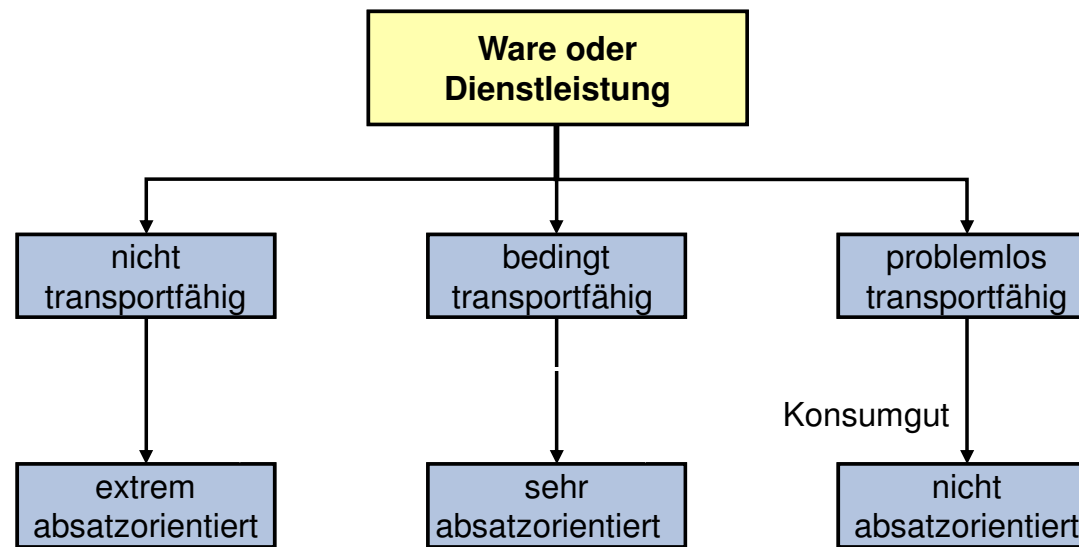

Seite 74, Abb. 9: Absatzorientierung des Standortes

## KAPITEL B: KONSTITUTIVE ENTSCHEIDUNGEN DES BETRIEBS

### 2. DIE BETRIEBLICHE STANDORTWAHL

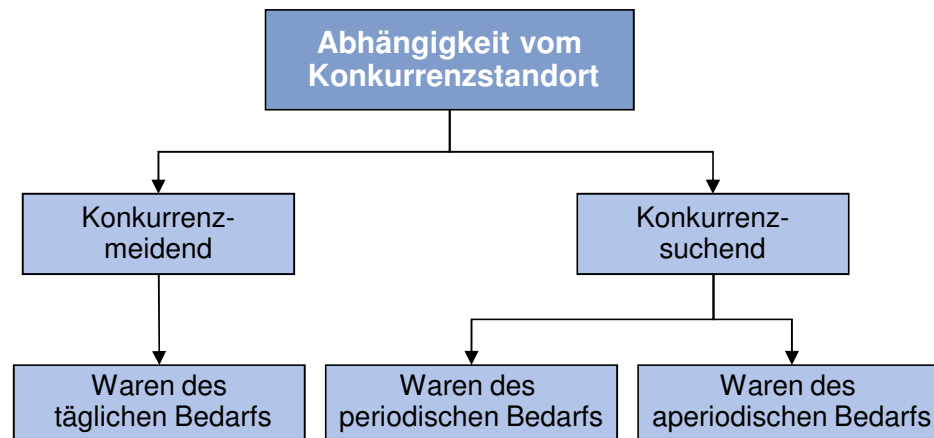

Seite 75, Abb. 10: Konkurrenzabhängigkeit der unterschiedlichen Waren

## KAPITEL B: KONSTITUTIVE ENTSCHEIDUNGEN DES BETRIEBS

### 2. DIE BETRIEBLICHE STANDORTWAHL

| Standortanforderungen<br>(Zielkriterien)                                                               | Gewichtun<br>g | Standortalternativen |      |            |      |            |     |
|--------------------------------------------------------------------------------------------------------|----------------|----------------------|------|------------|------|------------|-----|
|                                                                                                        |                | Standort A           |      | Standort B |      | Standort C |     |
|                                                                                                        | (G)            | B                    | G B  | B          | G B  | B          | G B |
| Expansionsmöglichkeiten                                                                                | 0,05           | 9                    | 0,45 | 6          | 0,30 | 10         | 0,5 |
| Arbeitsmarktpotenzial                                                                                  | 0,30           | 3                    | 0,90 | 9          | 2,70 | 6          | 1,8 |
| Zulieferungen                                                                                          | 0,10           | 4                    | 0,40 | 6          | 0,60 | 2          | 0,2 |
| Verkehrsanbindung                                                                                      | 0,10           | 9                    | 0,90 | 5          | 0,50 | 3          | 0,3 |
| Entsorgung                                                                                             | 0,15           | 5                    | 0,75 | 6          | 0,90 | 8          | 1,2 |
| Absatzmarktnähe                                                                                        | 0,20           | 10                   | 2,00 | 4          | 0,80 | 5          | 1,0 |
| Steuerbelastung                                                                                        | 0,05           | 3                    | 0,15 | 5          | 0,25 | 6          | 0,3 |
| Gesamtwert                                                                                             |                | 5,55                 |      | 6,05       |      | 5,3        |     |
| Bewertungsskala (B):                    10 sehr gut ..... 6 gut ..... 3 befriedigend ..... 0 ungünstig |                |                      |      |            |      |            |     |

Seite 77, Abb. 11: Nutzwertanalyse zur Standortwahl

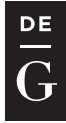

## KAPITEL B: KONSTITUTIVE ENTSCHEIDUNGEN DES BETRIEBS

### 2. DIE BETRIEBLICHE STANDORTWAHL

| Standortfaktor     | Höchstwert<br>(0 - 100) | Standortalternativen |     |     |     |
|--------------------|-------------------------|----------------------|-----|-----|-----|
|                    |                         | A                    | B   | C   | D   |
| Arbeitskräfte      | 100                     | 90                   | 80  | 50  | 75  |
| Materialversorgung | 75                      | 70                   | 75  | 75  | 70  |
| Entsorgung         | 75                      | 25                   | 50  | 75  | 65  |
| Absatzmarktnähe    | 50                      | 25                   | 35  | 40  | 45  |
| Gewerbeimmobilien  | 25                      | 15                   | 25  | 10  | 20  |
| Steuerbelastung    | 25                      | 10                   | 15  | 25  | 15  |
| Gesamtpunktzahl    | 350                     | 235                  | 280 | 275 | 290 |
| Rangfolge          |                         | 4                    | 2   | 3   | 1   |

Seite 79, Abb. 12: Punkte-Bewertungsschema

## KAPITEL B: KONSTITUTIVE ENTSCHEIDUNGEN DES BETRIEBS

### 2. DIE BETRIEBLICHE STANDORTWAHL

| Kunden<br>n = 5 | Koordinaten |            | Mengen       | $x_i \cdot m_i$ | $y_i \cdot m_i$ |
|-----------------|-------------|------------|--------------|-----------------|-----------------|
|                 | $x_i$ (km)  | $y_i$ (km) | $m_i$ (t)    |                 |                 |
| A               | 100         | 50         | 100          | 10.000          | 5.000           |
| B               | 150         | 100        | 150          | 22.500          | 15.000          |
| C               | 200         | 35         | 200          | 40.000          | 7.000           |
| D               | 50          | 200        | 50           | 2.500           | 10.000          |
| E               | 150         | 50         | 100          | 15.000          | 5.000           |
| <b>Gesamt</b>   |             |            | <b>= 600</b> | <b>= 90.000</b> | <b>= 42.000</b> |

Seite 80, Abb. 13: Steiner-Weber-Modell mit  $n = 5$



## KAPITEL B: KONSTITUTIVE ENTSCHEIDUNGEN DES BETRIEBS

### 2. DIE BETRIEBLICHE STANDORTWAHL

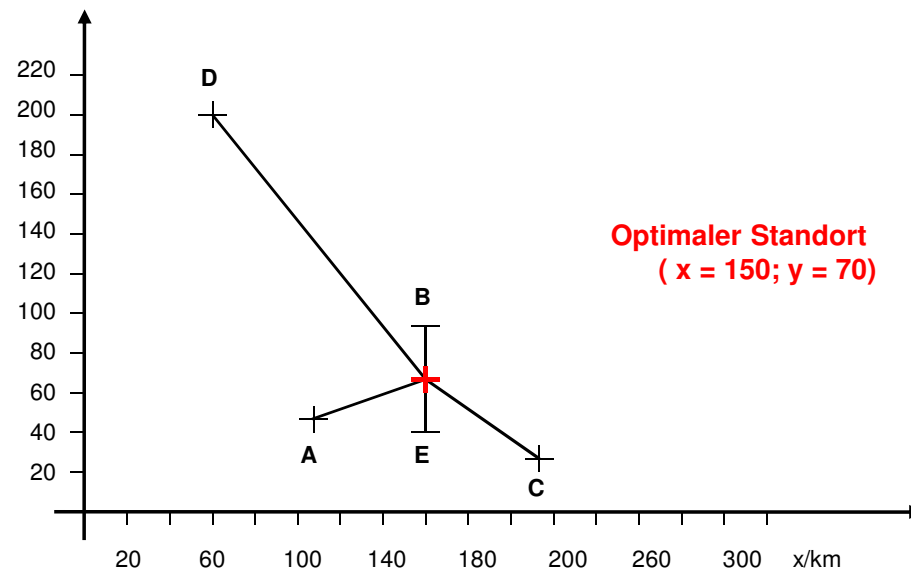

Seite 80, Abb. 14: Grafische Lösung

## KAPITEL B: KONSTITUTIVE ENTSCHEIDUNGEN DES BETRIEBS

### 2. DIE BETRIEBLICHE STANDORTWAHL

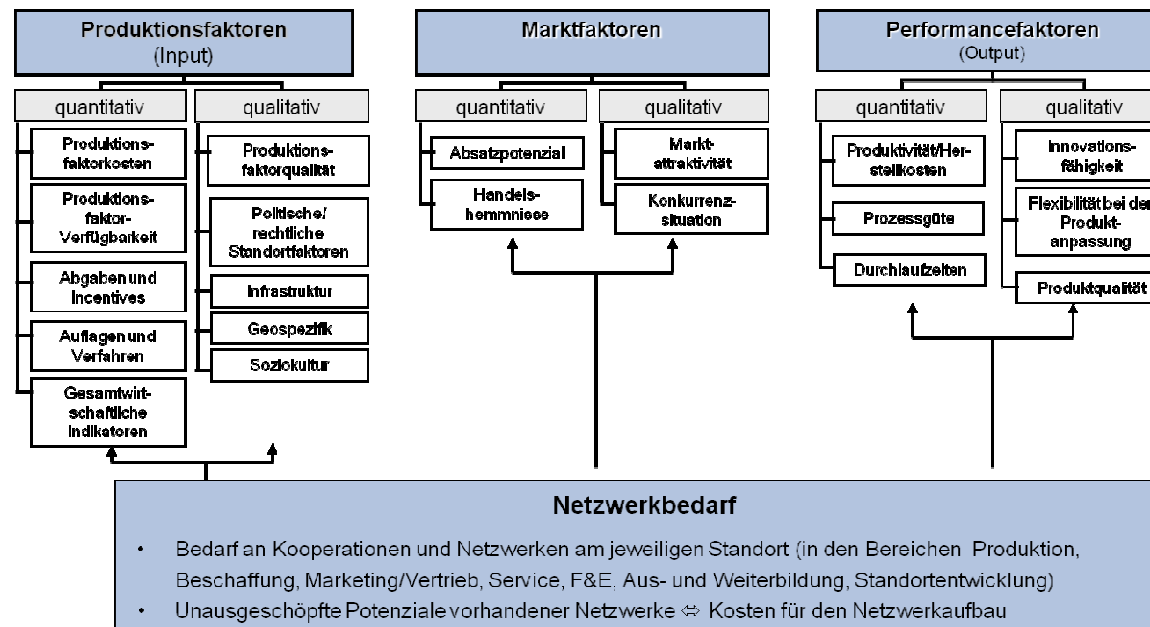

Seite 82, Abb. 15: Erweiterte Standortfaktorensystematik  
(Vgl. Kinkel, S.: Die Strategie im Fokus. Erfolgskritische Standortfaktoren für verschiedene Internationalisierungsstrategien, S. 53)

### **3. DER RECHTLICHE AUFBAU DER BETRIEBE**

3.1 DIE BEDEUTUNG DER RECHTSFORM

3.2 DIE RECHTSFORMEN PRIVATER BETRIEBE

3.3 DIE RECHTSFORMEN ÖFFENTLICHER BETRIEBE

3.4 DER WECHSEL DER RECHTSFORM

## KAPITEL B: KONSTITUTIVE ENTSCHEIDUNGEN DES BETRIEBS

### 3. DER RECHTLICHE AUFBAU DER BETRIEBE

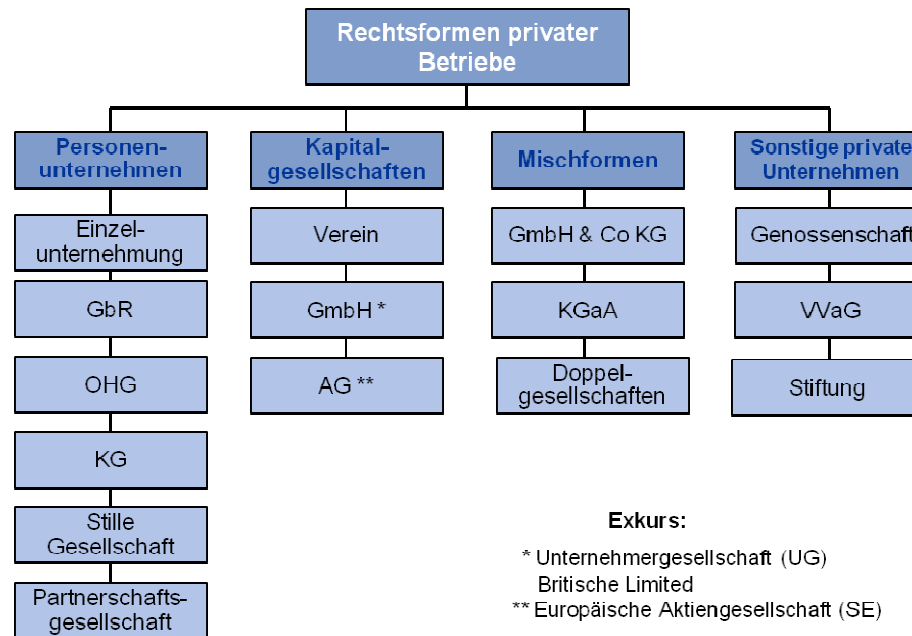

Seite 86, Abb. 16: Rechtsformen privater Betriebe im Überblick

## KAPITEL B: KONSTITUTIVE ENTSCHEIDUNGEN DES BETRIEBS

### 3. DER RECHTLICHE AUFBAU DER BETRIEBE

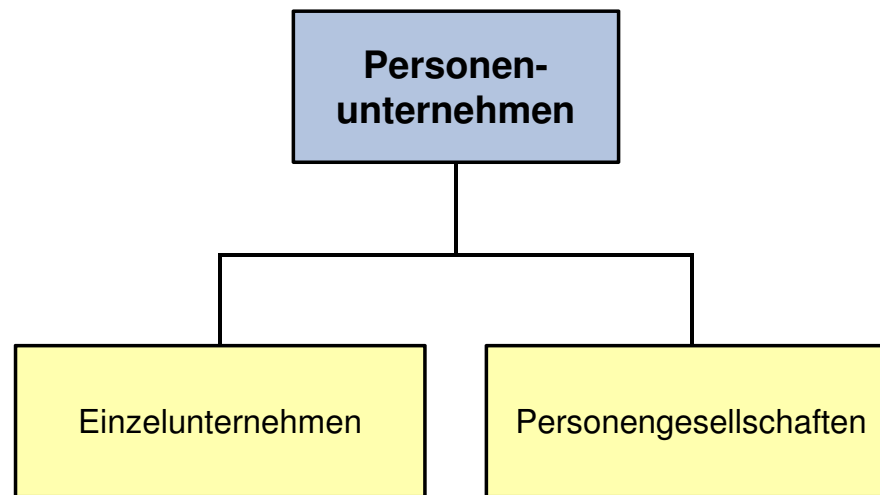

Seite 87, Abb. 17: Personenunternehmen

## KAPITEL B: KONSTITUTIVE ENTSCHEIDUNGEN DES BETRIEBS

### 3. DER RECHTLICHE AUFBAU DER BETRIEBE

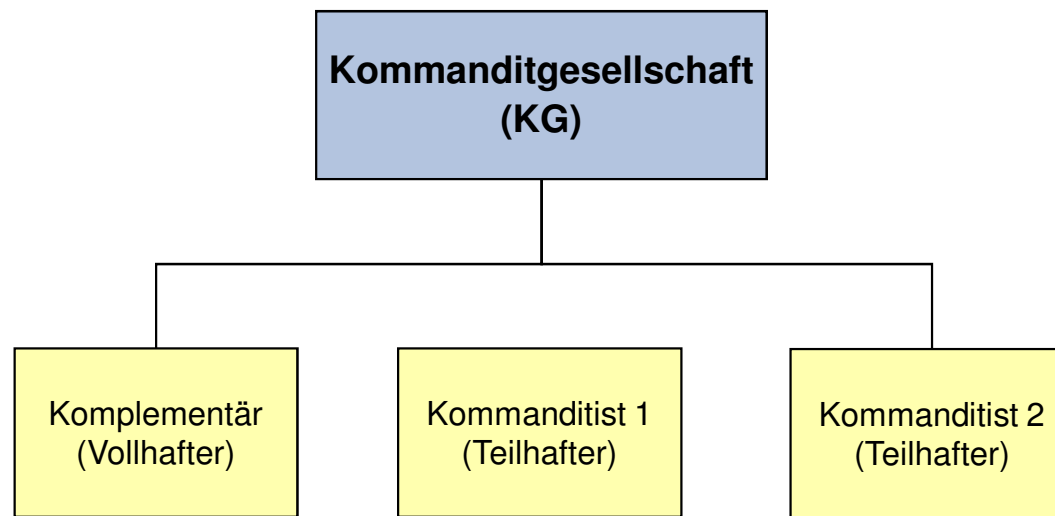

Seite 91, Abb. 18: Aufbau einer Kommanditgesellschaft

## KAPITEL B: KONSTITUTIVE ENTSCHEIDUNGEN DES BETRIEBS

### 3. DER RECHTLICHE AUFBAU DER BETRIEBE

| Merkmale                                                   | Komplementär *    | Kommanditist |
|------------------------------------------------------------|-------------------|--------------|
| Haftungsbasis                                              | gesamtes Vermögen | nur Einlage  |
| Geschäftsführung                                           | ja                | nein         |
| Vertretung                                                 | ja                | nein         |
| Kontrollrechte                                             | ja                | bedingt      |
| Kündigungsmöglichkeit                                      | ja                | ja           |
| Wettbewerbsverbot                                          | ja                | nein         |
| Insolvenz Gesellschafter                                   | Auflösung         | Ausscheiden  |
| Tod Gesellschafter                                         | Fortbestand       | Fortbestand  |
| Name in Firma                                              | ja                | nein         |
| Verluste mindern                                           | Kapital           | Einlage      |
| * gilt auch für Einzelunternehmer und OHG - Gesellschafter |                   |              |

Seite 93, Abb. 19: Gegenüberstellung Komplementär - Kommanditist

## KAPITEL B: KONSTITUTIVE ENTSCHEIDUNGEN DES BETRIEBS

### 3. DER RECHTLICHE AUFBAU DER BETRIEBE

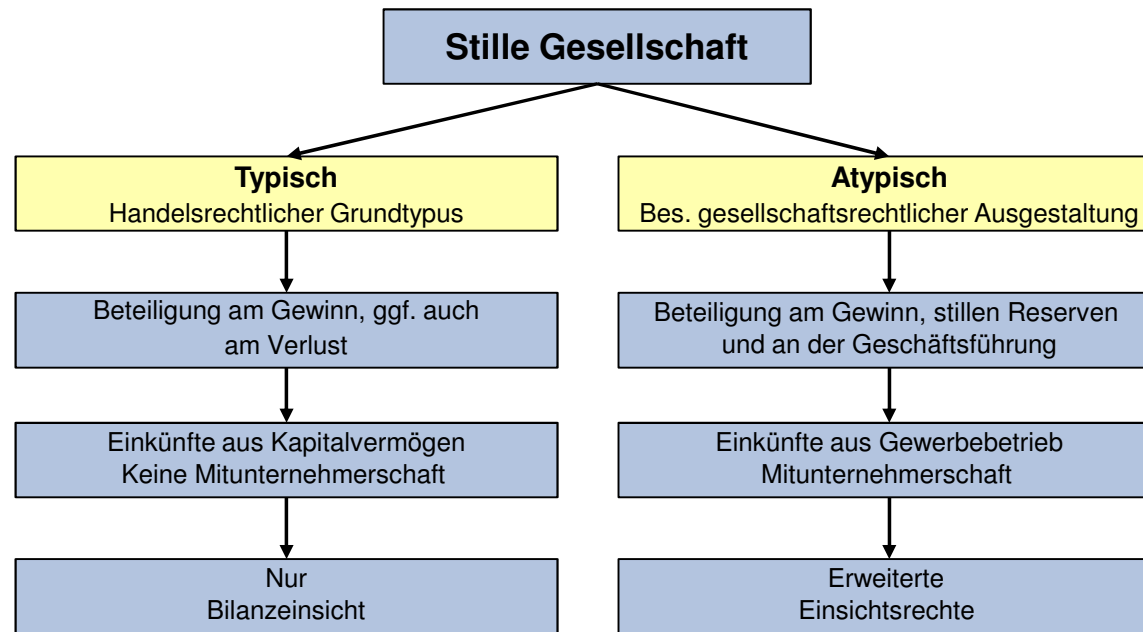

Seite 94, Abb. 20: Die Formen der stillen Gesellschaft



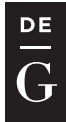

## KAPITEL B: KONSTITUTIVE ENTSCHEIDUNGEN DES BETRIEBS

### 3. DER RECHTLICHE AUFBAU DER BETRIEBE

| Kriterium                   | BGB-Gesellschaft                                  | OHG                                                                                     | KG                                                                                                      | Stille Gesellschaft                                            | Partnerschafts-gesellschaft                       |
|-----------------------------|---------------------------------------------------|-----------------------------------------------------------------------------------------|---------------------------------------------------------------------------------------------------------|----------------------------------------------------------------|---------------------------------------------------|
| Voraussetzung               | Jeder gemeinsame Zweck                            | Handelsgewerbe oder Registereintrag                                                     | Handelsgewerbe oder Registereintrag                                                                     | Kein Handelsgewerbe                                            | Kein Handelsgewerbe                               |
| Vermögen                    | Gesamthand                                        | Gesamthand (nach außen ist OHG Rechtsträger)                                            | Gesamthand (nach außen ist KG Rechtsträger)                                                             | Kein gemeinsames Vermögen                                      | Gesamthand                                        |
| Haftung                     | Gesellschafter haften persönlich und unbeschränkt | Gesellschaft haftet wie jur. Person, daneben Gesellschafter persönlich und unbeschränkt | Wie OHG. Kommanditist haftet nur mit Einlage (zwei Ausnahmen)                                           | Stiller haftet mit Einlage, wenn Verlustbeteiligung vereinbart | Partner sind Gesamtschuldner                      |
| Vertretung der Gesellschaft | Durch alle Gesellschafter gemeinsam               | Jeder Gesellschafter ist allein vertretungs-berechtigt                                  | Wie OHG. Kommanditist nicht vertretungs-berechtigt                                                      | Stiller nicht vertretungs-berechtigt                           | Wie OHG. Grundsatz der Einzelvertretungs-befugnis |
| Innenverhältnis             | Gemeinsame Führung durch alle Gesellschafter      | Jeder Gesellschafter bei gewöhnlichen Handlungen allein geschäftsführungsbefugt         | Wie OHG. Kommanditist wirkt nur mit bei Gesellschaftsbeschlüssen und hat beschränktes Widerspruchsrecht | Nur Bilanzkontrolle usw. durch Stillen                         | Wie OHG.                                          |

Seite 95, Abb. 21: Gegenüberstellung Personengesellschaften

## KAPITEL B: KONSTITUTIVE ENTSCHEIDUNGEN DES BETRIEBS

### 3. DER RECHTLICHE AUFBAU DER BETRIEBE

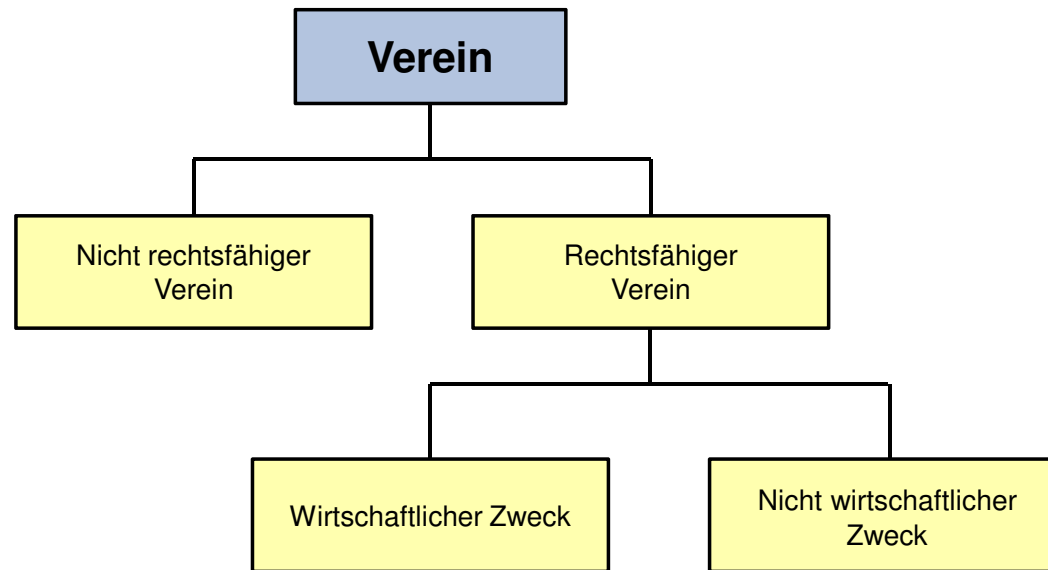

Seite 97, Abb. 22: Die Formen des Vereins

## KAPITEL B: KONSTITUTIVE ENTSCHEIDUNGEN DES BETRIEBS

### 3. DER RECHTLICHE AUFBAU DER BETRIEBE

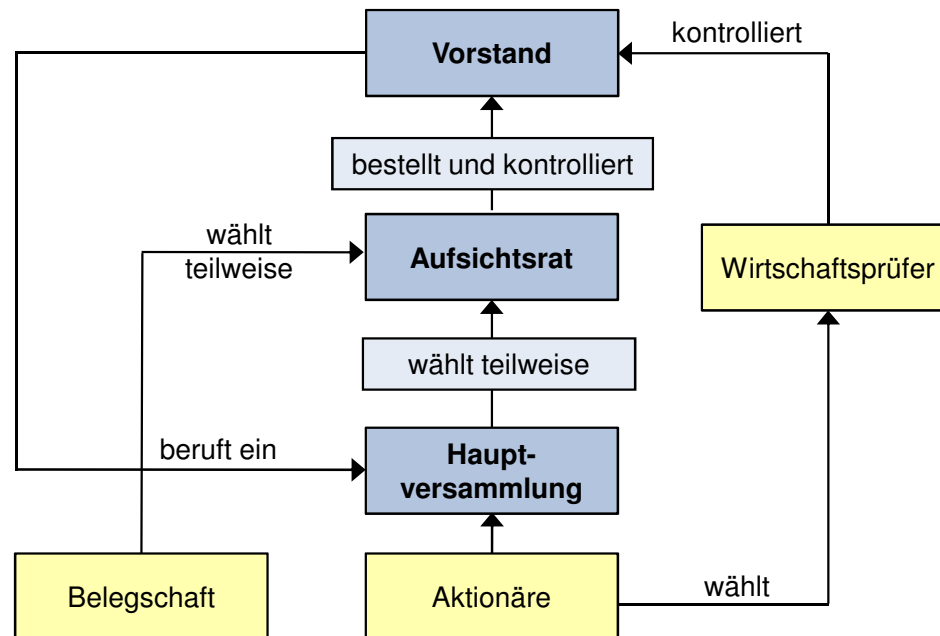

Seite 104, Abb. 23: Vereinfachter Aufbau einer AG

## KAPITEL B: KONSTITUTIVE ENTSCHEIDUNGEN DES BETRIEBS

### 3. DER RECHTLICHE AUFBAU DER BETRIEBE

| Kriterien                     | GmbH                                                                                                                                                                                                                                                                                                                                                                                                                                                                     | AG                                                                                                                                                                                                                                                                                                                                                                                     |
|-------------------------------|--------------------------------------------------------------------------------------------------------------------------------------------------------------------------------------------------------------------------------------------------------------------------------------------------------------------------------------------------------------------------------------------------------------------------------------------------------------------------|----------------------------------------------------------------------------------------------------------------------------------------------------------------------------------------------------------------------------------------------------------------------------------------------------------------------------------------------------------------------------------------|
| Gründung                      | 1. Sachgründungsbericht<br>2. Mindestzahl von Gründern: 1                                                                                                                                                                                                                                                                                                                                                                                                                | 1. Gründungsprüfung<br>2. Mindestzahl von Gründern: 1                                                                                                                                                                                                                                                                                                                                  |
| Firma                         | Personen-, Sach- oder gemischte Firma möglich; Zusatz GmbH                                                                                                                                                                                                                                                                                                                                                                                                               | Bei Neugründung nur noch Sachfirma möglich; Zusatz AG                                                                                                                                                                                                                                                                                                                                  |
| Leitung                       | 1. Geschäftsführer<br>2. Ohne Zeitbeschränkung                                                                                                                                                                                                                                                                                                                                                                                                                           | 1. Vorstand<br>2. Auf 5 Jahre, Wiederwahl möglich                                                                                                                                                                                                                                                                                                                                      |
| Aufsichtsrat                  | 1. Nach dem BetrVG nur, wenn mehr als 500 Arbeitnehmer<br>2. Nach dem MitbestG mehr als 2.000 Arbeitnehmer<br>3. Nach dem Montan-MitbestG wie bei der AG                                                                                                                                                                                                                                                                                                                 | 1. Durch das AktG zwingend vorgeschrieben                                                                                                                                                                                                                                                                                                                                              |
| Gesamtheit der Gesellschafter | 1. Gesellschafterversammlung<br>2. Einberufung durch eingeschriebenen Brief; schriftliche oder fernmündliche Abstimmung möglich<br>3. Stimmrecht nach Geschäftsanteilen                                                                                                                                                                                                                                                                                                  | 1. Hauptversammlung<br>2. Einberufung durch Veröffentlichung in den Gesellschaftsblättern: Firma, Ort, Sitz der AG und Zeit der Hauptversammlung; Einberufungsfrist und Beschlussfassung der Aktionäre<br>3. Stimmrecht nach Aktiennennbeträgen                                                                                                                                        |
| Mindestkapital                | Stammkapital mind. 25.000 Euro                                                                                                                                                                                                                                                                                                                                                                                                                                           | Grundkapital mind. 50.000 Euro                                                                                                                                                                                                                                                                                                                                                         |
| Anteil                        | 1. Stammeinlage (mind. 100 Euro)<br>2. Teilbarkeit des Geschäftsanteils bei höheren Beträgen mit Genehmigung der Gesellschaft möglich<br>3. Nur eine Stammeinlage kann bei Gründung übernommen werden<br>4. Persönliche Bindung an den Anteil; kein börsenmäßiger, nur freihändiger Verkauf; notarielle Beurkundung des Abtretungsvertrages<br>5. Anmeldung der Veräußerung bei der Gesellschaft; Genehmigung ist nur dann notwendig, wenn in der Satzung vorgeschrieben | 1. Aktie (mind. 1 Euro)<br>2. Unteilbarkeit der Aktie<br>3. Mehrere Aktien können bei der Gründung übernommen werden<br>4. Keine persönliche Bindung an den Anteil; börsenmäßiger Handel; formlose Eigentumsübertragung bei Inhaberaktien; durch Indossament bei Namensaktien<br>5. Anmeldung bei Namensaktien<br>Genehmigung nur bei vinkulierten (gebundenen) Namensaktien notwendig |
| Nachschusspflicht             | Kann im Gesellschaftsvertrag vorgesehen werden                                                                                                                                                                                                                                                                                                                                                                                                                           | Nicht möglich                                                                                                                                                                                                                                                                                                                                                                          |

Seite 109, Abb. 24: Vergleich AG und GmbH

## KAPITEL B: KONSTITUTIVE ENTSCHEIDUNGEN DES BETRIEBS

### 3. DER RECHTLICHE AUFBAU DER BETRIEBE

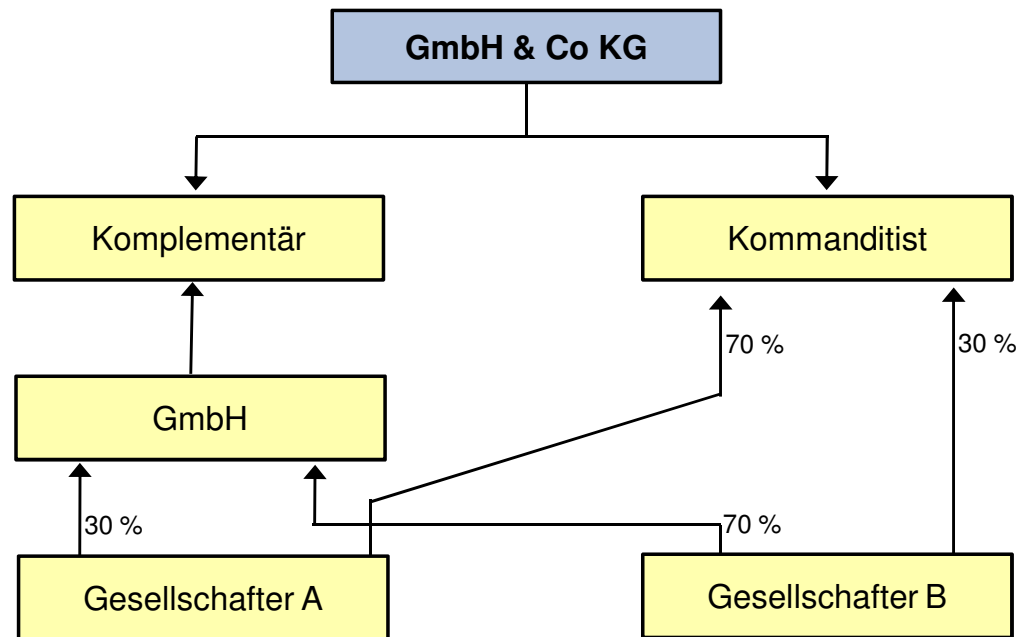

Seite 112, Abb. 25: Beispiel für den möglichen Aufbau einer GmbH & Co KG

## KAPITEL B: KONSTITUTIVE ENTSCHEIDUNGEN DES BETRIEBS

### 3. DER RECHTLICHE AUFBAU DER BETRIEBE

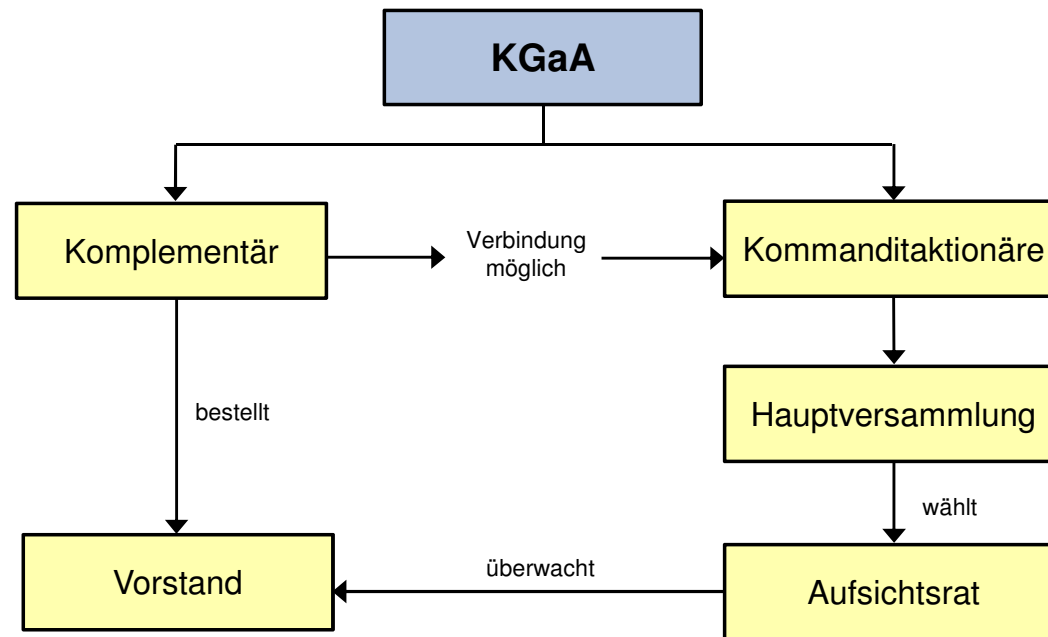

Seite 114, Abb. 26: Aufbau der KGaA

## KAPITEL B: KONSTITUTIVE ENTSCHEIDUNGEN DES BETRIEBS

### 3. DER RECHTLICHE AUFBAU DER BETRIEBE

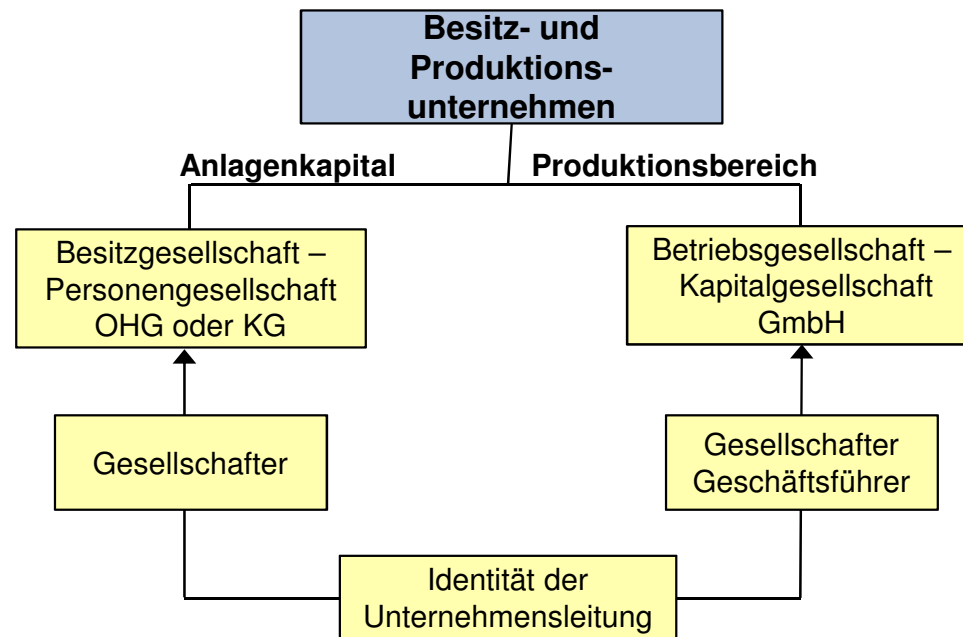

Seite 116, Abb. 27: Modell einer Doppelgesellschaft

## KAPITEL B: KONSTITUTIVE ENTSCHEIDUNGEN DES BETRIEBS

### 3. DER RECHTLICHE AUFBAU DER BETRIEBE

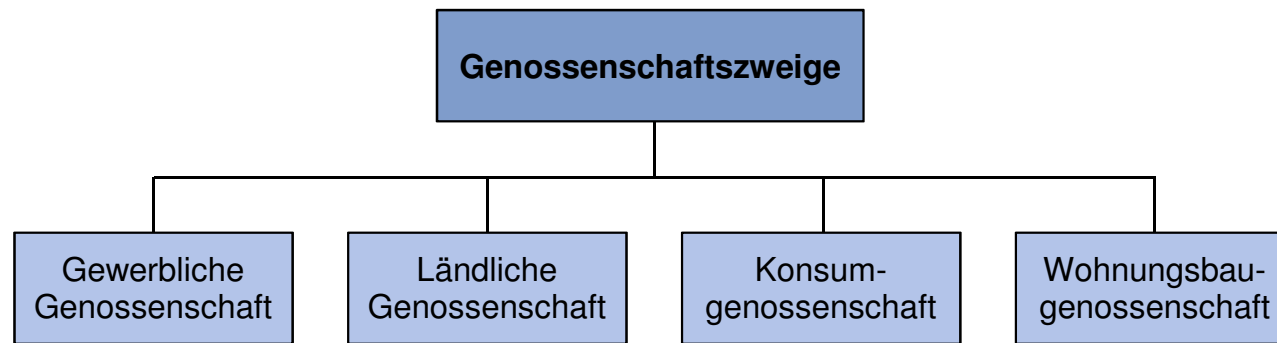

Seite 120, Abb. 28: Genossenschaftszweige



## KAPITEL B: KONSTITUTIVE ENTSCHEIDUNGEN DES BETRIEBS

### 3. DER RECHTLICHE AUFBAU DER BETRIEBE

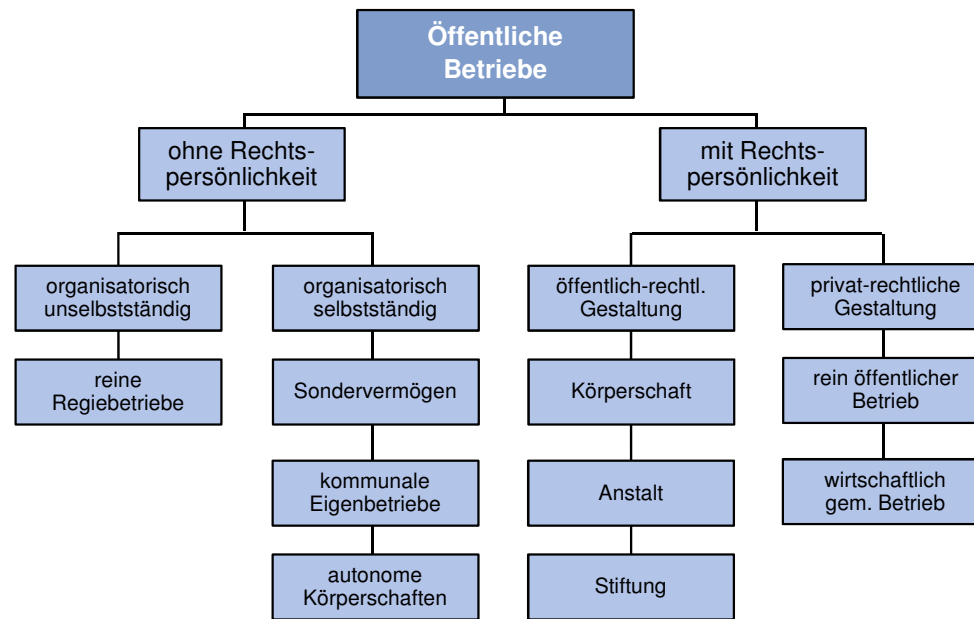

Seite 123, Abb. 29: Rechtsformen öffentlicher Betriebe

## 4. DER ZUSAMMENSCHLUSS VON UNTERNEHMEN

4.1 DIE BEDEUTUNG VON UNTERNEHMENSZUSAMMENSCHLÜSSEN

4.2 DIE ZIELE VON UNTERNEHMENSZUSAMMENSCHLÜSSEN

4.3 EINTEILUNG VON UNTERNEHMENSZUSAMMENSCHLÜSSEN

4.4 KOOPERATIONSFORMEN

4.5 KONZENTRATIONSFORMEN

## KAPITEL B: KONSTITUTIVE ENTSCHEIDUNGEN DES BETRIEBS

### 4. DER ZUSAMMENSCHLUSS VON UNTERNEHMEN

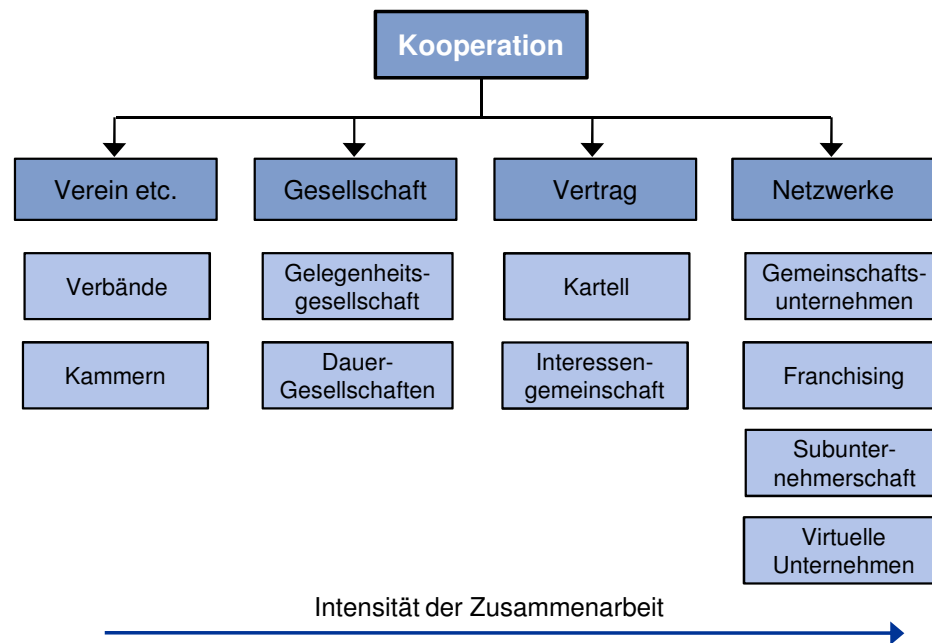

Seite 132, Abb. 30: Kooperationsformen

## KAPITEL B: KONSTITUTIVE ENTSCHEIDUNGEN DES BETRIEBS

### 4. DER ZUSAMMENSCHLUSS VON UNTERNEHMEN

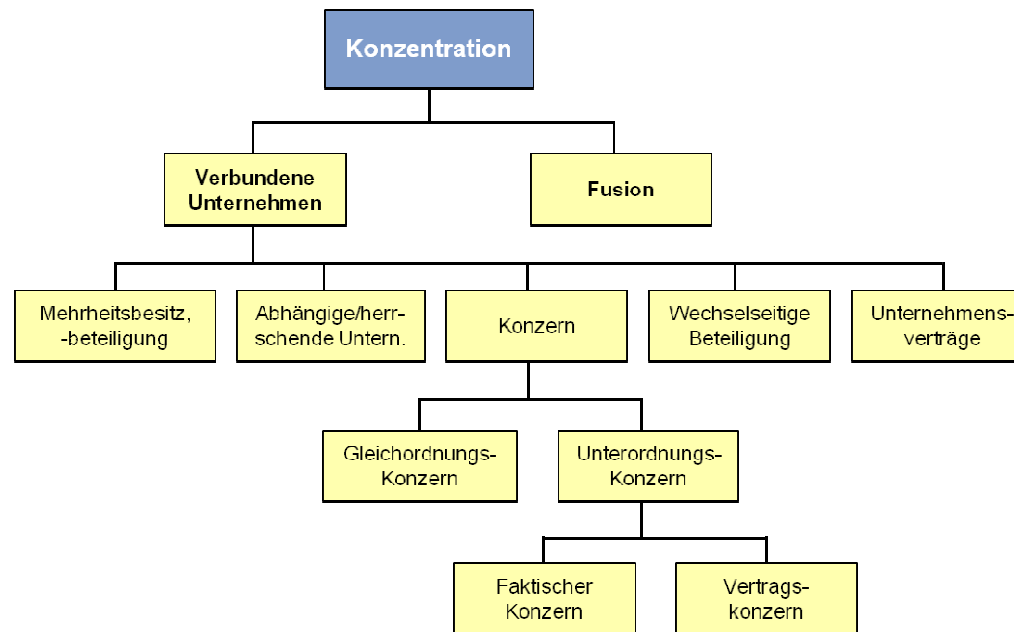

Seite 133, Abb. 31: Die wichtigsten Konzentrationsformen

## KAPITEL B: KONSTITUTIVE ENTSCHEIDUNGEN DES BETRIEBS

### 4. DER ZUSAMMENSCHLUSS VON UNTERNEHMEN

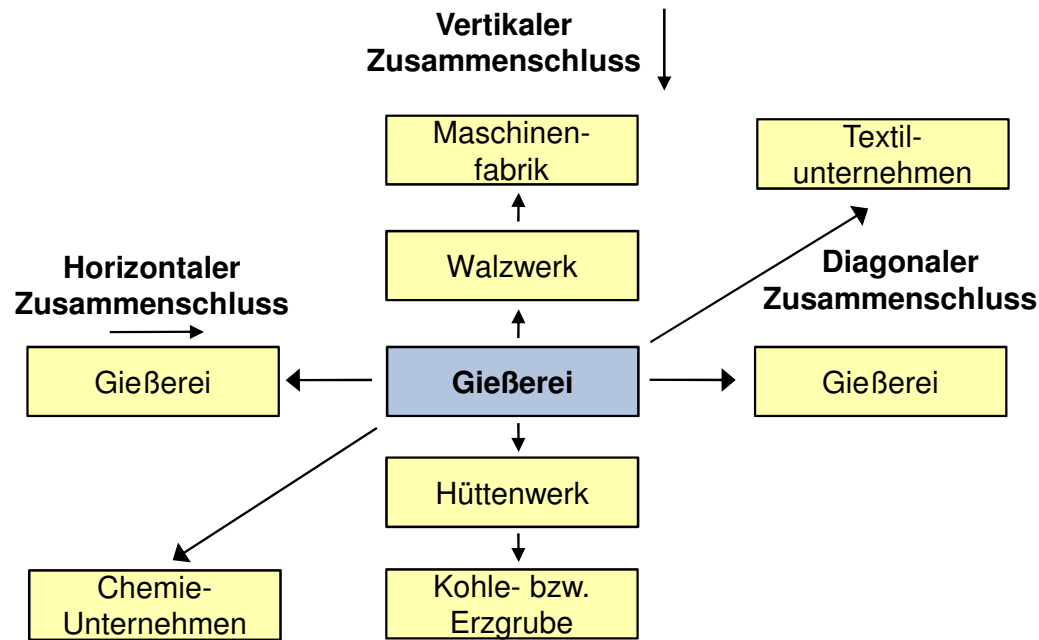

Seite 134, Abb. 32: Arten von Unternehmenszusammenschlüssen

## KAPITEL B: KONSTITUTIVE ENTSCHEIDUNGEN DES BETRIEBS

### 4. DER ZUSAMMENSCHLUSS VON UNTERNEHMEN

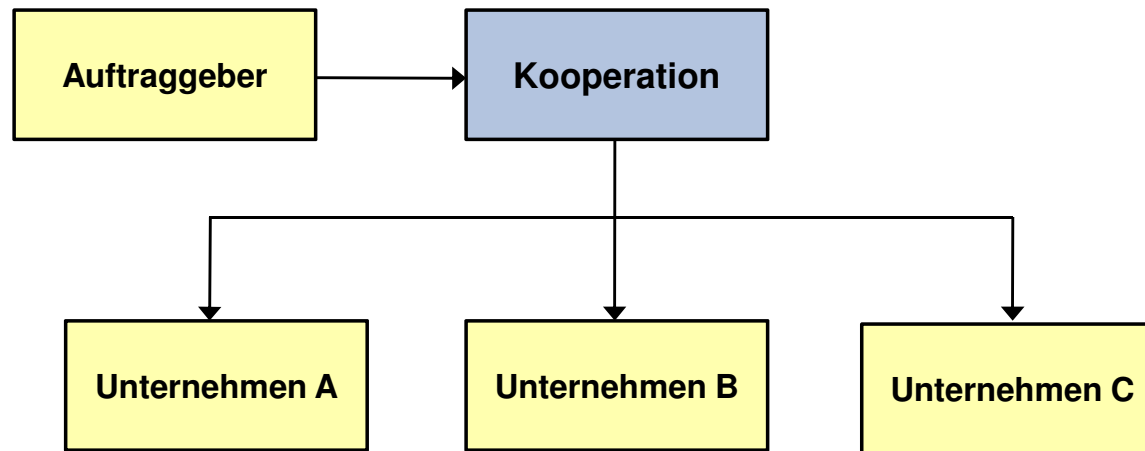

Seite 138, Abb. 33: Aufbau einer echten Arbeitsgemeinschaft

## KAPITEL B: KONSTITUTIVE ENTSCHEIDUNGEN DES BETRIEBS

### 4. DER ZUSAMMENSCHLUSS VON UNTERNEHMEN

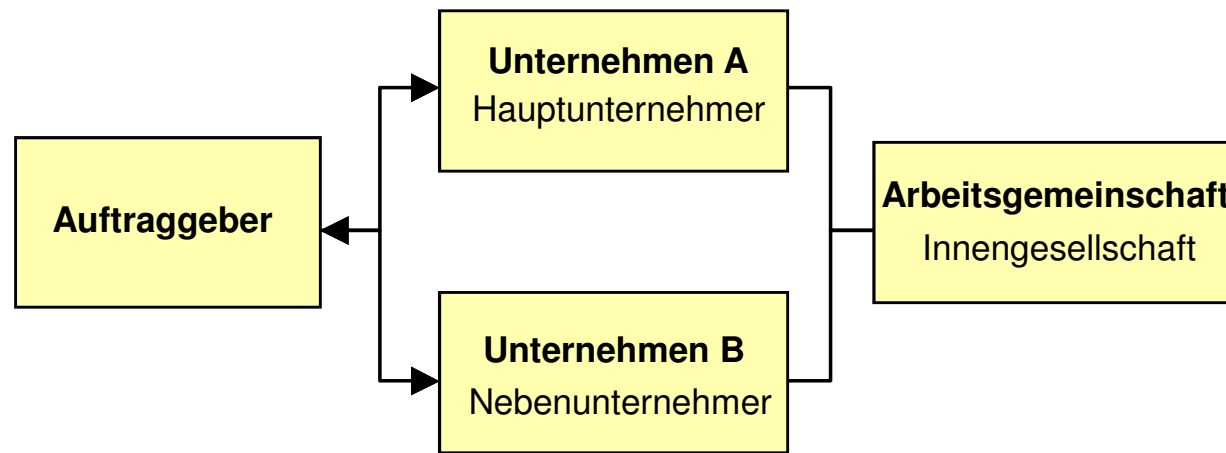

Seite 138, Abb. 34: Unechte Arbeitsgemeinschaft (Haupt- und Nebenunternehmer)

## KAPITEL B: KONSTITUTIVE ENTSCHEIDUNGEN DES BETRIEBS

### 4. DER ZUSAMMENSCHLUSS VON UNTERNEHMEN

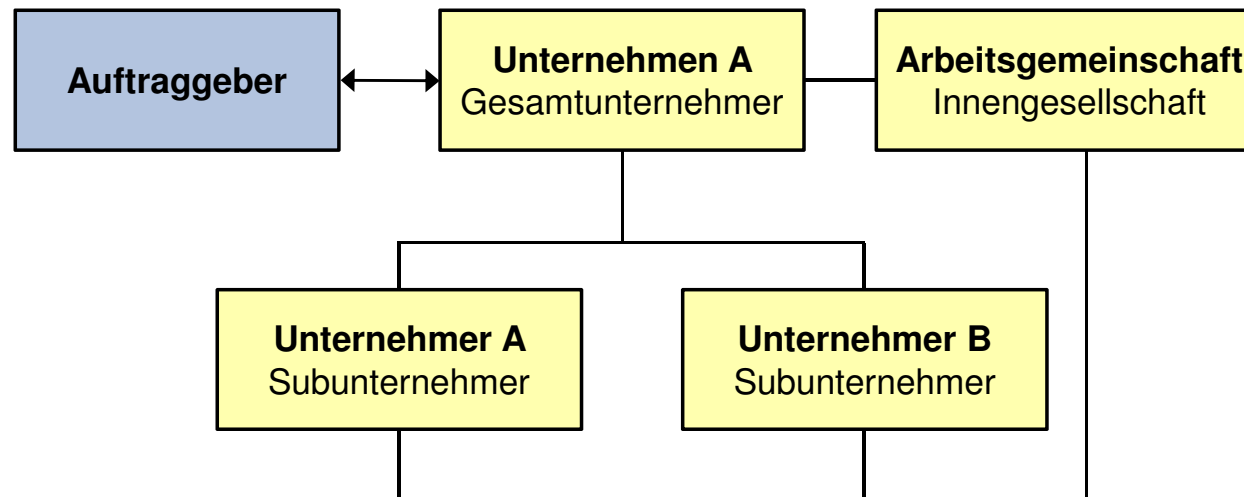

Seite 139, Abb. 35: Unechte Arbeitsgemeinschaft (Gesamt- und Subunternehmer)



## KAPITEL B: KONSTITUTIVE ENTSCHEIDUNGEN DES BETRIEBS

### 4. DER ZUSAMMENSCHLUSS VON UNTERNEHMEN

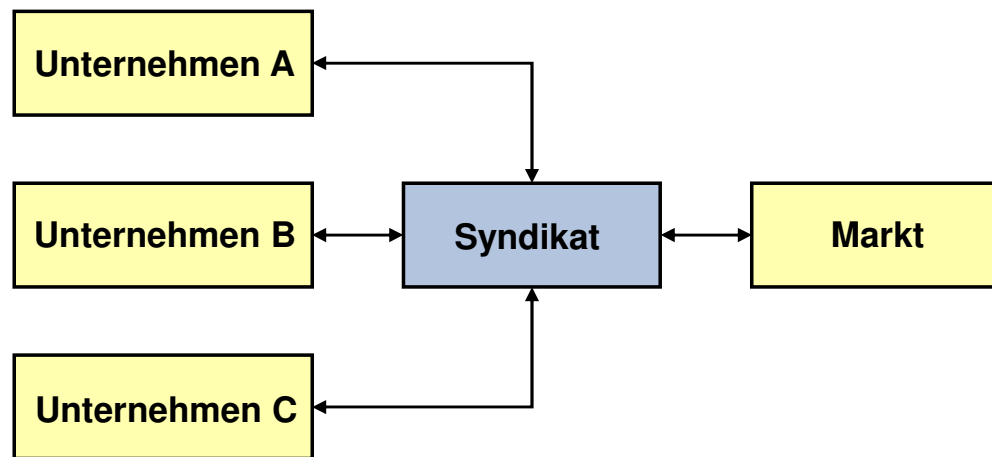

Seite 142, Abb. 36: Syndikat

## KAPITEL B: KONSTITUTIVE ENTSCHEIDUNGEN DES BETRIEBS

### 4. DER ZUSAMMENSCHLUSS VON UNTERNEHMEN

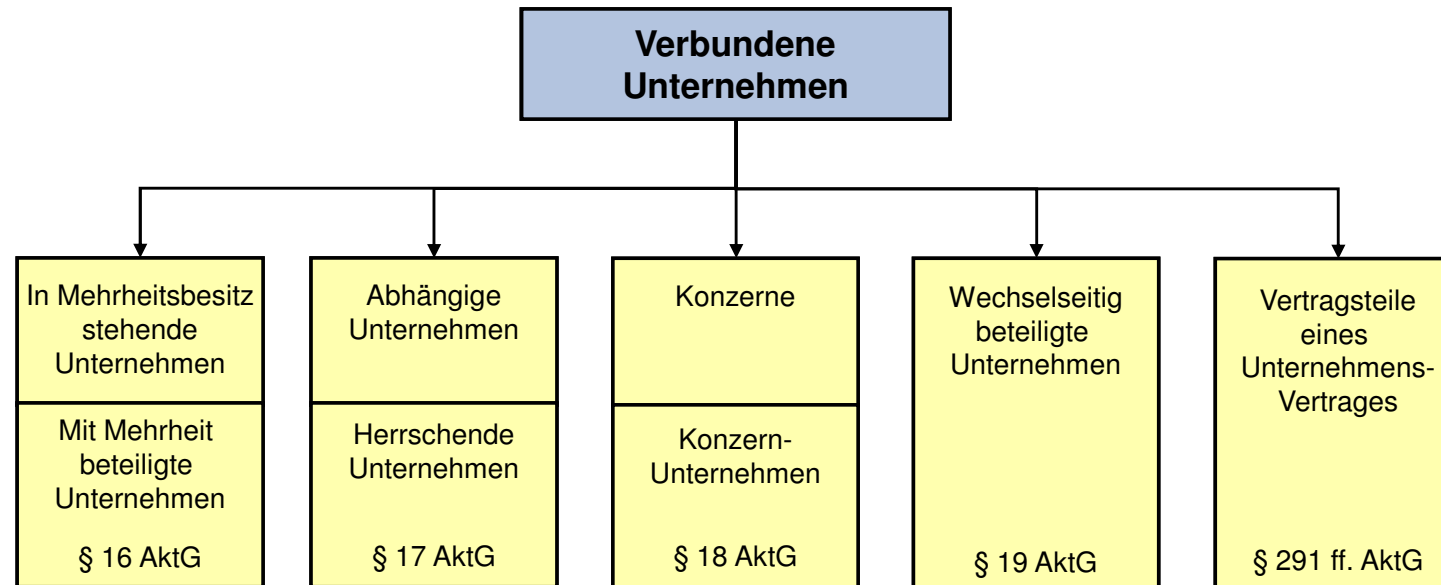

Seite 148, Abb. 37: Verbundene Unternehmen nach §§ 15-19 AktG

## KAPITEL B: KONSTITUTIVE ENTSCHEIDUNGEN DES BETRIEBS

### 4. DER ZUSAMMENSCHLUSS VON UNTERNEHMEN

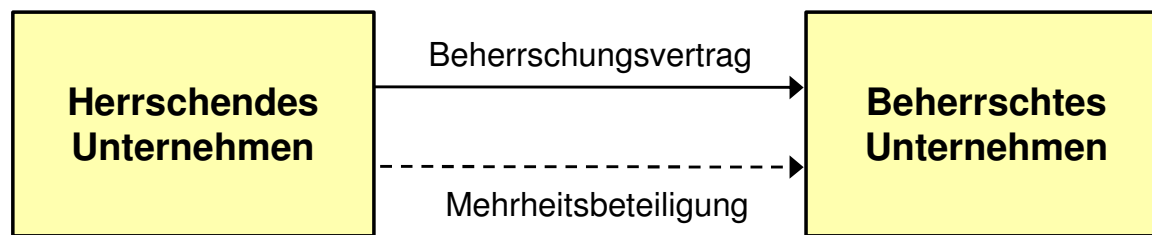

Seite 150, Abb. 38: Vertragskonzern

## KAPITEL B: KONSTITUTIVE ENTSCHEIDUNGEN DES BETRIEBS

### 4. DER ZUSAMMENSCHLUSS VON UNTERNEHMEN

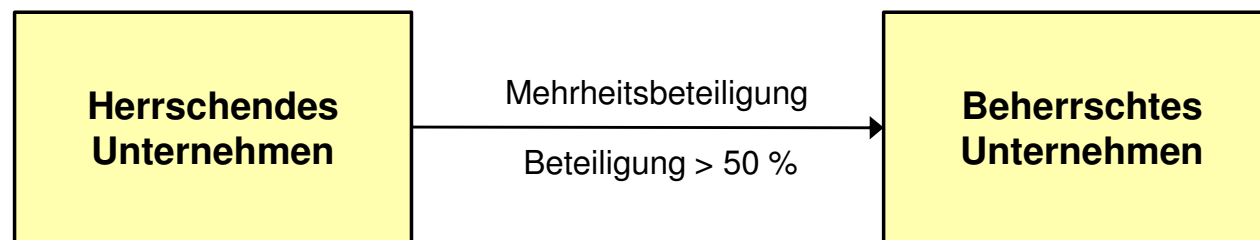

Seite 151, Abb. 39: Faktischer Konzern

## KAPITEL B: KONSTITUTIVE ENTSCHEIDUNGEN DES BETRIEBS

### 4. DER ZUSAMMENSCHLUSS VON UNTERNEHMEN

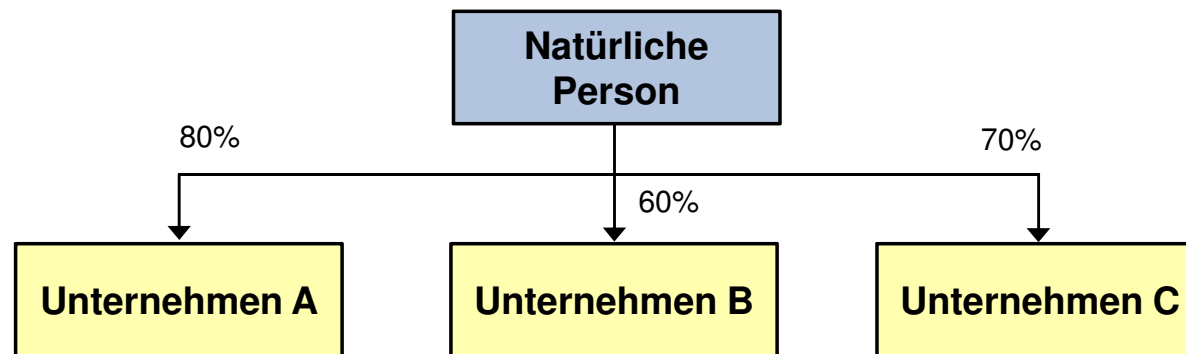

Seite 151, Abb. 40: Bildung eines Gleichordnungskonzerns

## KAPITEL B: KONSTITUTIVE ENTSCHEIDUNGEN DES BETRIEBS

### 4. DER ZUSAMMENSCHLUSS VON UNTERNEHMEN

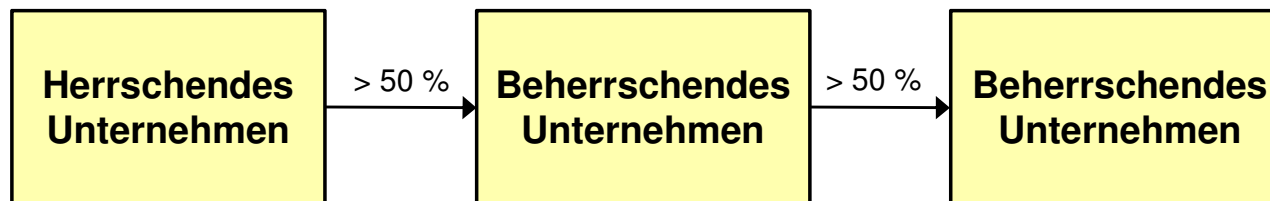

Seite 152, Abb. 41: Konzernaufbau nach dem Verschachtelungsprinzip

## KAPITEL B: KONSTITUTIVE ENTSCHEIDUNGEN DES BETRIEBS

### 4. DER ZUSAMMENSCHLUSS VON UNTERNEHMEN

| Formen                    | Konzernzentrale                                                             | Tochtergesellschaften                                                                                                                                       |
|---------------------------|-----------------------------------------------------------------------------|-------------------------------------------------------------------------------------------------------------------------------------------------------------|
| <b>Operative Holding</b>  | Strategische und operative Leitung                                          | Detaillierte, regelmäßige Berichterstattung über die Erreichung operativer Ziele (z.B. über Absatzmengen, Kostenarten, Bestände)                            |
| <b>Management-holding</b> | Strategische Leitung, nur im Ausnahmefall Eingriff in die operative Leitung | Operative Leitung (regelmäßige Berichterstattung über Ergebnisse wie z.B. über Gewinne, Umsatz, Kosten; Zusatzinformationen nur auf Anforderung)            |
| <b>Finanz-holding</b>     | Leitung über die Vorgabe finanzieller Zielgrößen                            | Operative und strategische Leitung (Berichterstattung über die Erreichung finanzieller Ziele in aggregierter Form wie z.B. Gewinn, Rentabilität, Cash-Flow) |

Seite 153, Abb. 42: Mögliche Aufgabenverteilung in der Holding

## KAPITEL B: KONSTITUTIVE ENTSCHEIDUNGEN DES BETRIEBS

### 4. DER ZUSAMMENSCHLUSS VON UNTERNEHMEN

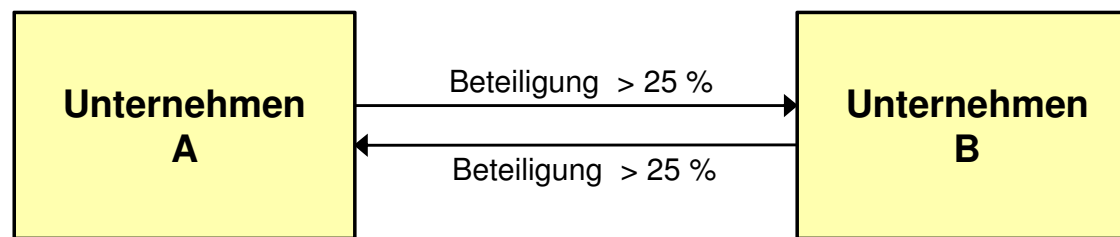

Seite 154, Abb. 43: Wechselseitige Beteiligung



## KAPITEL B: KONSTITUTIVE ENTSCHEIDUNGEN DES BETRIEBS

### 4. DER ZUSAMMENSCHLUSS VON UNTERNEHMEN

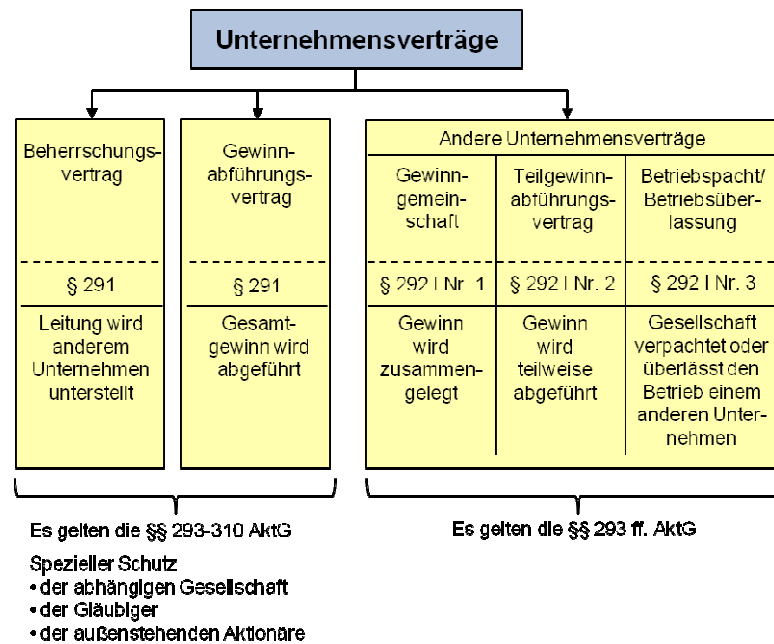

Seite 155, Abb. 44: Unternehmensverträge nach dem Aktiengesetz

## KAPITEL B: KONSTITUTIVE ENTSCHEIDUNGEN DES BETRIEBS

### 4. DER ZUSAMMENSCHLUSS VON UNTERNEHMEN

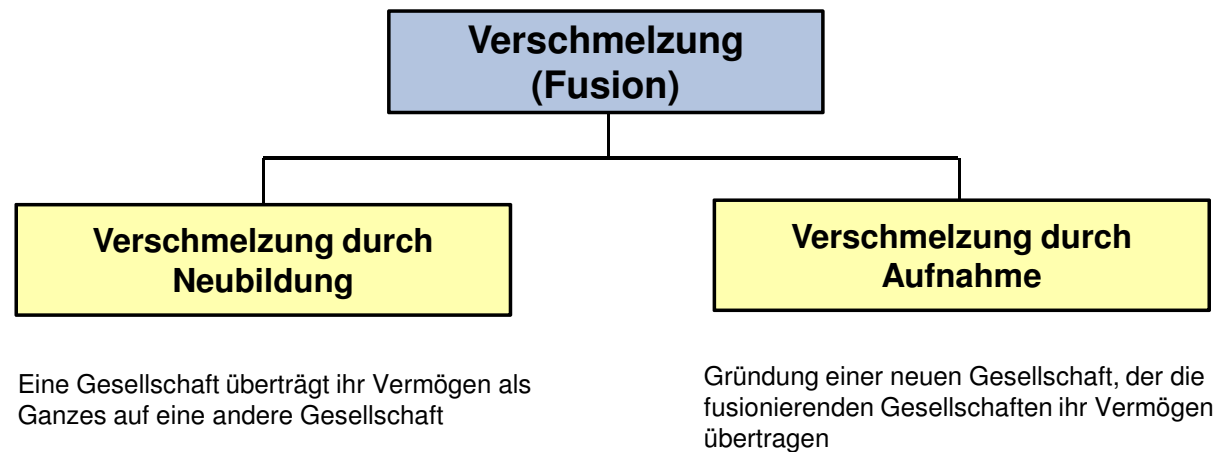

Seite 156, Abb. 45: Die beiden Tatbestände der Fusion

## KAPITEL B: KONSTITUTIVE ENTSCHEIDUNGEN DES BETRIEBS

### 4. DER ZUSAMMENSCHLUSS VON UNTERNEHMEN

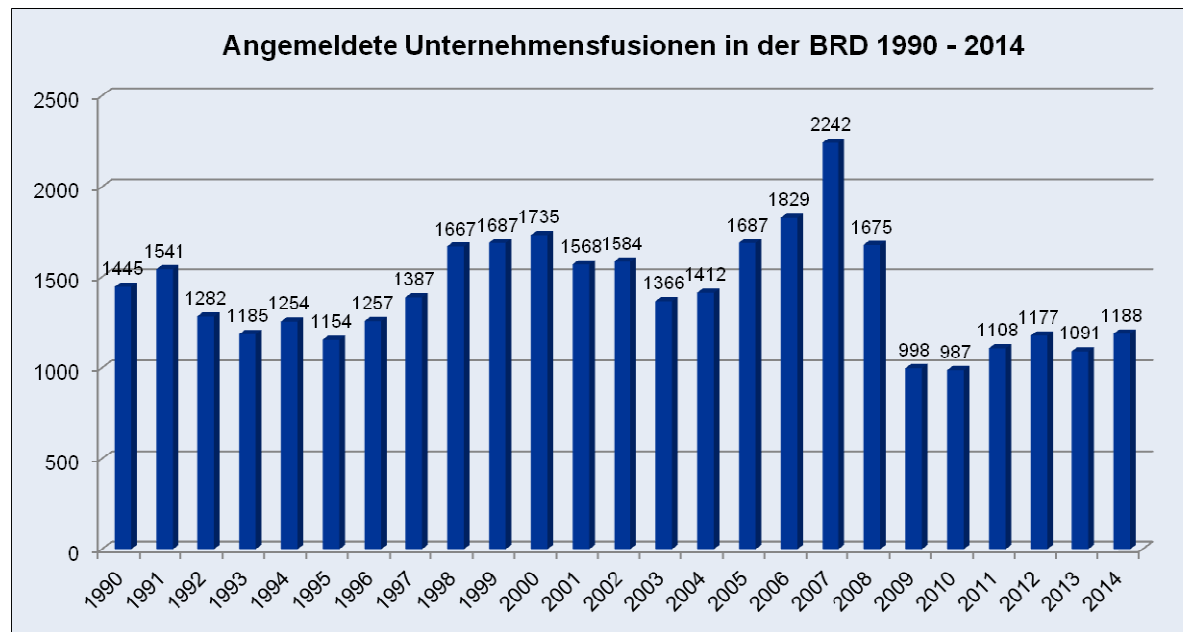

Seite 157, Abb. 46: Unternehmensfusionen in der BRD  
(Vgl. Bundeskartellamt (Hrsg.): Das Bundeskartellamt Jahresbericht 2014, Bonn 2015, S. 31)
