# Supplementary material
Source: publisher site journal article supplement (https://www.degruyterbrill.com/publication/isbn/9783486989434/downloadAsset/9783486989434_Folien--de.zip)
Supplement: Supplementary file 3 [file Teil_C_ABWL.pdf › Teil_C_ABWL.pdf]

# ZUSATZMATERIALIEN

## ALLGEMEINE BETRIEBSWIRTSCHAFTSLEHRE

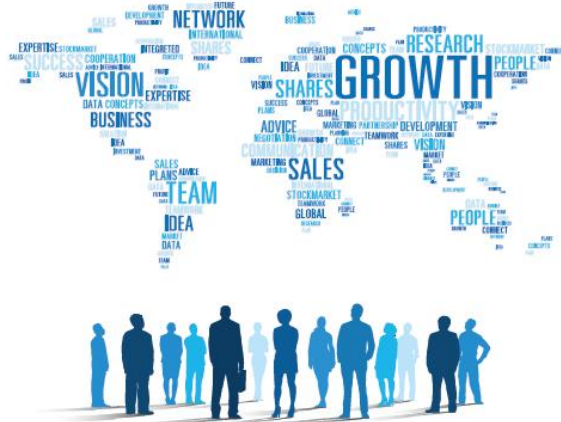

## KAPITEL C: UNTERNEHMENSFÜHRUNG UND ORGANISATION

2. UNTERNEHMENSFÜHRUNG

3. ORGANISATION

4. TRENDS IN DER UNTERNEHMENSFÜHRUNG UND ORGANISATION

## 2. UNTERNEHMENSFÜHRUNG

2.1 ENTWICKLUNG DER UNTERNEHMENSFÜHRUNG

2.2 AUFGABEN UND INHALT DER UNTERNEHMENSFÜHRUNG

2.3 DIE TRÄGER VON FÜHRUNGSENTSCHEIDUNGEN

2.4 DIE FÜHRUNGSFUNKTIONEN

2.5 PERSONAL-(FÜHRUNGS-)SYSTEME

# KAPITEL C: UNTERNEHMENSFÜHRUNG UND ORGANISATION

## 2. UNTERNEHMENSFÜHRUNG

| Führung                                                                                                                                                                                                                                                                   |                                                                                                                                                                                                                                                                                                                                       |                                                                                                                                                                                                                                                                    |
|---------------------------------------------------------------------------------------------------------------------------------------------------------------------------------------------------------------------------------------------------------------------------|---------------------------------------------------------------------------------------------------------------------------------------------------------------------------------------------------------------------------------------------------------------------------------------------------------------------------------------|--------------------------------------------------------------------------------------------------------------------------------------------------------------------------------------------------------------------------------------------------------------------|
| Entwicklung                                                                                                                                                                                                                                                               | Gestaltung                                                                                                                                                                                                                                                                                                                            | Lenkung                                                                                                                                                                                                                                                            |
| <ul style="list-style-type: none"> <li>– Suchen und Realisieren neuer Ziele und Verhaltensweisen</li> <li>– Beeinflussung der Unternehmenskultur</li> <li>– Förderung der Innovationsfähigkeit</li> <li>– Rahmenbedingungen zur Unternehmensevolution schaffen</li> </ul> | <ul style="list-style-type: none"> <li>– Entwerfen von Ordnung</li> <li>– Organisationsgestaltung               <ul style="list-style-type: none"> <li>– Aufbauorganisation</li> <li>– Ablauforganisation</li> </ul> </li> <li>– Regeln schaffen</li> <li>– Das Unternehmen als handlungsfähige Ganzheit aufrecht erhalten</li> </ul> | <ul style="list-style-type: none"> <li>– Festlegen, Auslösen und Kontrollieren von zielgerichteten Aktivitäten</li> <li>– Vollzug von Handlungen</li> <li>– Steuerung der Beschaffung, Produktion und Distribution</li> <li>– Nutzung von Informationen</li> </ul> |

Seite 168, Abb. 1: Hauptfunktion der Führung

# KAPITEL C: UNTERNEHMENSFÜHRUNG UND ORGANISATION

## 2. UNTERNEHMENSFÜHRUNG

| Das Persönlichkeitsprofil der Führungskräfte                                                                                                                                                                                                                                                                                                                                                                                                                                                                                                                                                                                                                                                                                                                                        |
|-------------------------------------------------------------------------------------------------------------------------------------------------------------------------------------------------------------------------------------------------------------------------------------------------------------------------------------------------------------------------------------------------------------------------------------------------------------------------------------------------------------------------------------------------------------------------------------------------------------------------------------------------------------------------------------------------------------------------------------------------------------------------------------|
| <ul style="list-style-type: none"> <li>- <b>Lebensläufe</b><br/>Soziale Herkunft, beruflicher Werdegang, Dienstalter, Verweildauer in einer Funktion etc.</li> <li>- <b>Werte und Mentalitäten</b><br/>Ideale, Sinn für Zukunftsprobleme, Innovationsbereitschaft, Widerstand gegen Veränderungen, Durchsetzungs- und Durchhaltevermögen, Ausdauer, Lernbereitschaft, Risikoeinstellung, Frustrationstoleranz etc.</li> </ul>                                                                                                                                                                                                                                                                                                                                                       |
| Die Rituale und Symbole                                                                                                                                                                                                                                                                                                                                                                                                                                                                                                                                                                                                                                                                                                                                                             |
| <ul style="list-style-type: none"> <li>- <b>Rituelles Verhalten der Führungskräfte</b><br/>Beförderungspraxis, Nachwuchs- und Kaderselektion, Sitzungsverhalten, Entscheidungsverhalten, Beziehungsverhalten, Bezugspersonen, Vorbildfunktion etc.</li> <li>- <b>Rituelles Verhalten der Mitarbeiter</b><br/>Besucherempfang, Begrüßung durch Telefonistin, Umgang mit Reklamationen, Wertschätzung des Kunden etc.</li> <li>- <b>Räumliche und gestalterische Symbole</b><br/>Erscheinungsbild, Zustand und Ausstattung der Gebäude, Anordnung, Gestaltung und Lage des Büros, Berufskleidung, Firmenwagen etc.</li> <li>- <b>Institutionalisierte Rituale und Konventionen</b><br/>Empfangsrituale von Gästen, Kleidungsnormen, Sitzungsrituale, Parkplatzordnung etc.</li> </ul> |
| Die Kommunikation                                                                                                                                                                                                                                                                                                                                                                                                                                                                                                                                                                                                                                                                                                                                                                   |
| <ul style="list-style-type: none"> <li>- <b>Kommunikationsstil</b><br/>Informations- und Kommunikationsverhalten, Konsens- und Kompromissbereitschaft etc.</li> <li>- <b>Kommunikation nach innen und außen</b><br/>Vorschlagswesen, Qualitätszirkel u. übrige Mitwirkungsformen, Dienstwege, Öffentlichkeitsarbeit etc.</li> </ul>                                                                                                                                                                                                                                                                                                                                                                                                                                                 |

Seite 170, Abb. 2: Kernfaktoren der Unternehmenskultur  
(in Anlehnung an Thommen, J.-P.: Managementorientierte Betriebswirtschaftslehre, 6. Aufl.,  
Zürich 2000, S.712)

Jung: Allgemeine Betriebswirtschaftslehre. De Gruyter Oldenbourg 2016. ISBN 978-3-486-76376-8

# KAPITEL C: UNTERNEHMENSFÜHRUNG UND ORGANISATION

## 2. UNTERNEHMENSFÜHRUNG

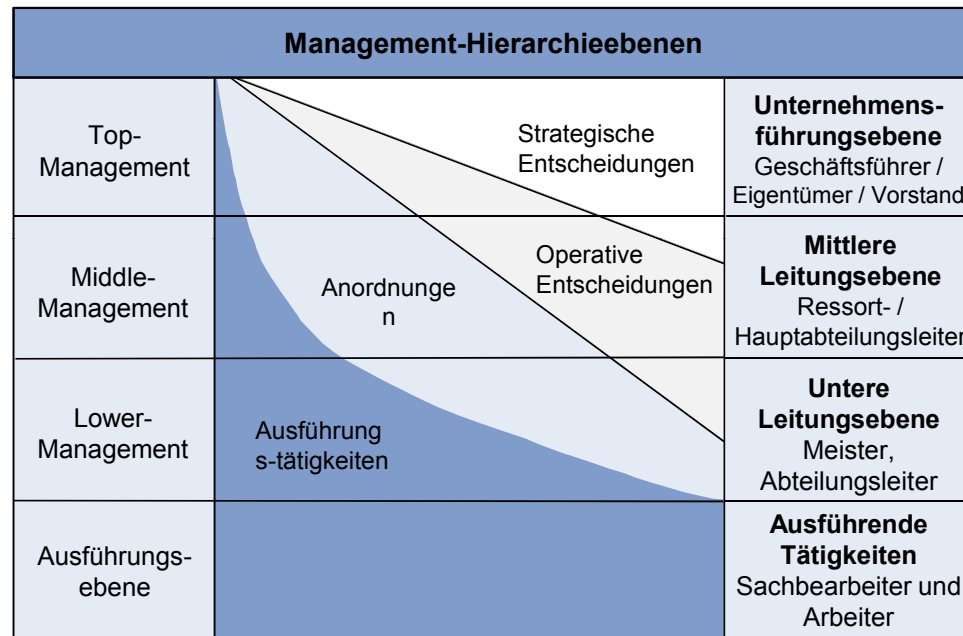

Seite 174, Abb. 3: Management-Ebenen

(in Anlehnung an Schulte-Zurhausen, M.: Organisation, 2.Aufl., München 1999 und  
Schierenbeck, H.: Grundzüge der Betriebswirtschaftslehre, 16. Aufl., München / Wien 2003)

Jung: Allgemeine Betriebswirtschaftslehre. De Gruyter Oldenbourg 2016. ISBN 978-3-486-76376-8

# KAPITEL C: UNTERNEHMENSFÜHRUNG UND ORGANISATION

## 2. UNTERNEHMENSFÜHRUNG

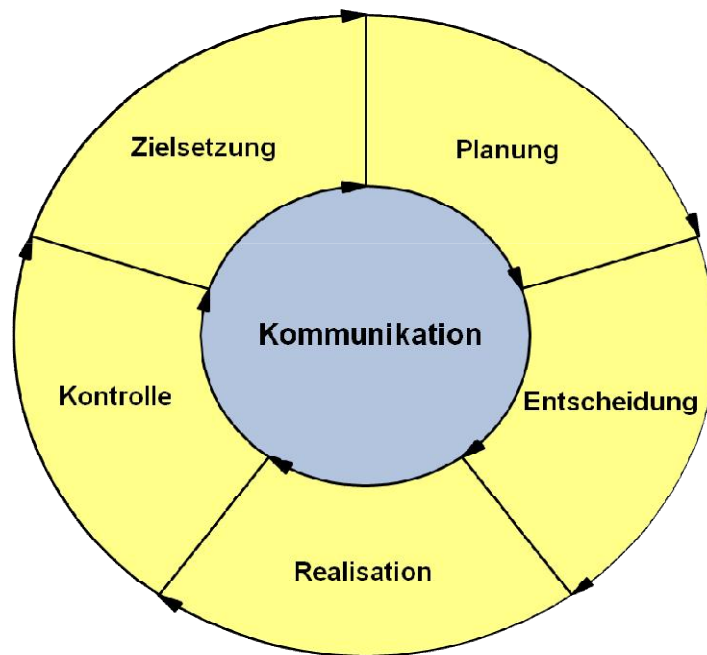

Seite 175, Abb. 4: Management-Kreis

## KAPITEL C: UNTERNEHMENSFÜHRUNG UND ORGANISATION

### 2. UNTERNEHMENSFÜHRUNG

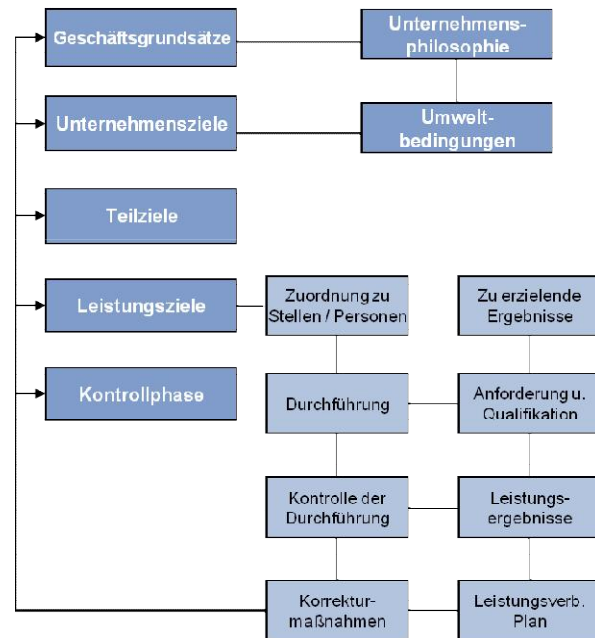

Seite 176, Abb. 5: Zusammenhänge zwischen Geschäftsgrundsätzen, Unternehmenszielen und Leistungszielen (in Anlehnung an Nagel, K.: Die 6 Erfolgsfaktoren des Unternehmens, Landsberg/ Lech 1991)



# KAPITEL C: UNTERNEHMENSFÜHRUNG UND ORGANISATION

## 2. UNTERNEHMENSFÜHRUNG

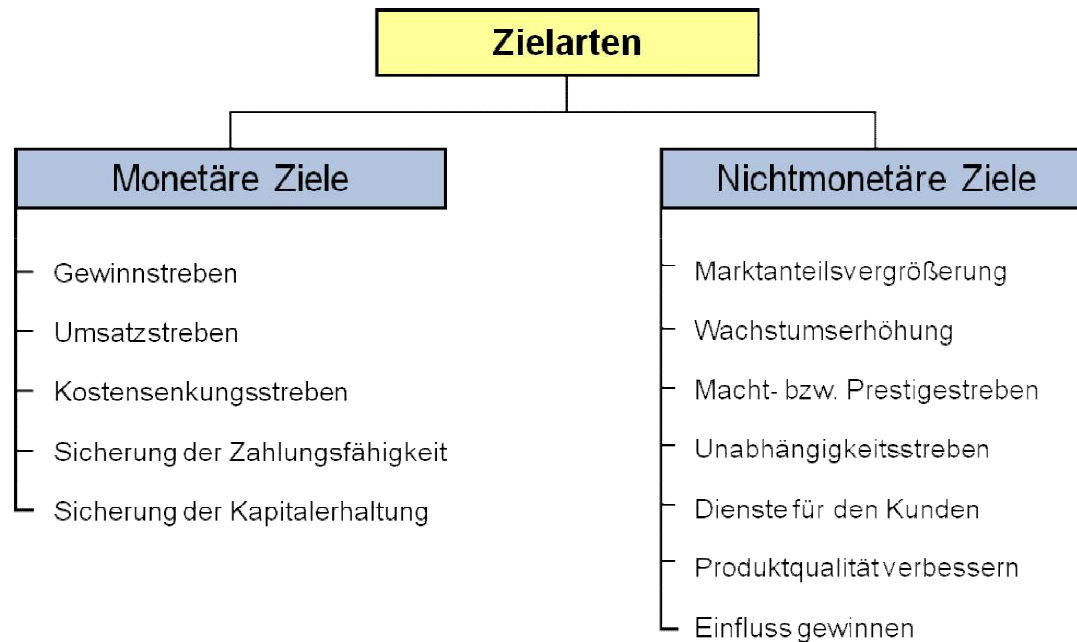

Seite 177, Abb. 6: Beispiele für monetäre und nichtmonetäre Ziele

## KAPITEL C: UNTERNEHMENSFÜHRUNG UND ORGANISATION

### 2. UNTERNEHMENSFÜHRUNG

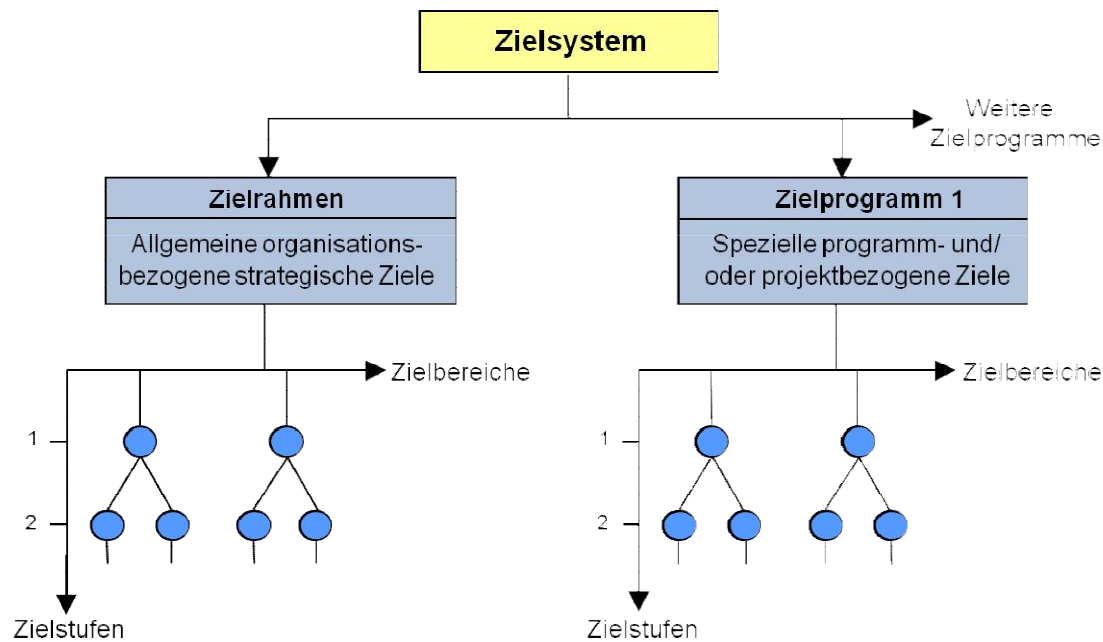

Seite 178, Abb. 7: Strukturmodell eines Zielsystems

## KAPITEL C: UNTERNEHMENSFÜHRUNG UND ORGANISATION

### 2. UNTERNEHMENSFÜHRUNG

| Inhalt                              | Ausmaß                        | Zeit                            |
|-------------------------------------|-------------------------------|---------------------------------|
| Steigerung des Umsatzes...          | ...um 10 %...                 | ... im 1. Quartal 20...         |
| Verringerung der Mitarbeiterzahl... | ...um 5 Schreibkräfte...      | ... ab dem 1.1.20...            |
| Auslastung des Drehautomaten...     | ...mit maximaler Kapazität... | ... vom 1.3.2011 bis 30.4.20... |

Seite 180, Abb. 8: Beispiele für Zielformatierung

## KAPITEL C: UNTERNEHMENSFÜHRUNG UND ORGANISATION

### 2. UNTERNEHMENSFÜHRUNG

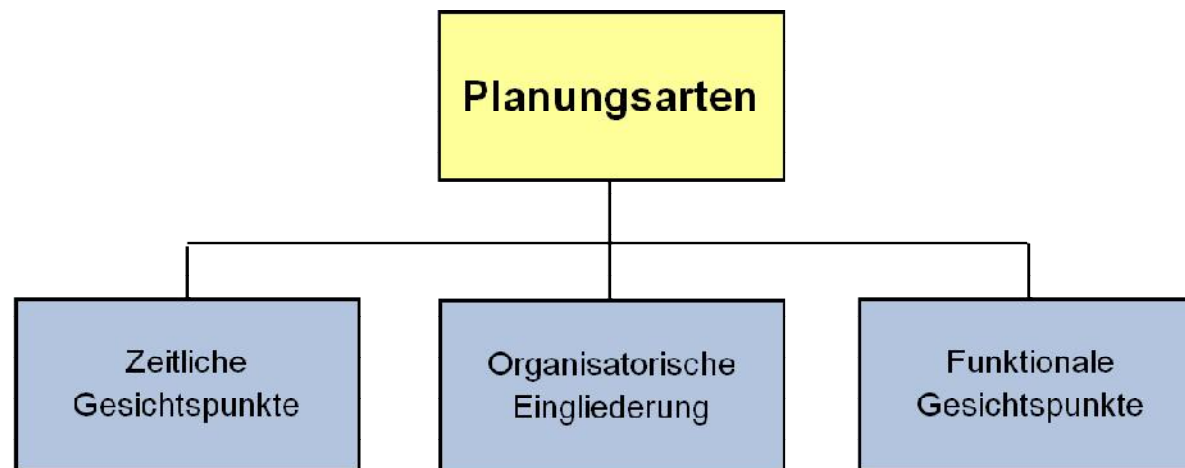

Seite 180, Abb. 8: Planungsarten

# KAPITEL C: UNTERNEHMENSFÜHRUNG UND ORGANISATION

## 2. UNTERNEHMENSFÜHRUNG

|           | Januar | Februar | März | April | Mai | Juni | Juli |
|-----------|--------|---------|------|-------|-----|------|------|
|           |        |         |      |       |     |      |      |
| 1.1.20... |        |         |      |       |     |      |      |
|           |        |         |      |       |     |      |      |
| 1.2.20... |        |         |      |       |     |      |      |
|           |        |         |      |       |     |      |      |
| 1.3.20... |        |         |      |       |     |      |      |
|           |        |         |      |       |     |      |      |

Seite 182, Abb. 10: Rollierende Planung

# KAPITEL C: UNTERNEHMENSFÜHRUNG UND ORGANISATION

## 2. UNTERNEHMENSFÜHRUNG

|            | Jan. | Feb. | März | April | Mai | Juni | Juli | Aug. | Sept. | Okt. |
|------------|------|------|------|-------|-----|------|------|------|-------|------|
|            |      |      |      |       |     |      |      |      |       |      |
| 1.01.20... |      |      |      |       |     |      |      |      |       |      |
|            |      |      |      |       |     |      |      |      |       |      |
| 1.04.20... |      |      |      |       |     |      |      |      |       |      |
|            |      |      |      |       |     |      |      |      |       |      |
| 1.07.20... |      |      |      |       |     |      |      |      |       |      |
|            |      |      |      |       |     |      |      |      |       |      |
| 1.10.20... |      |      |      |       |     |      |      |      |       |      |
|            |      |      |      |       |     |      |      |      |       |      |

Seite 182, Abb. 11: Blockplanung

# KAPITEL C: UNTERNEHMENSFÜHRUNG UND ORGANISATION

## 2. UNTERNEHMENSFÜHRUNG

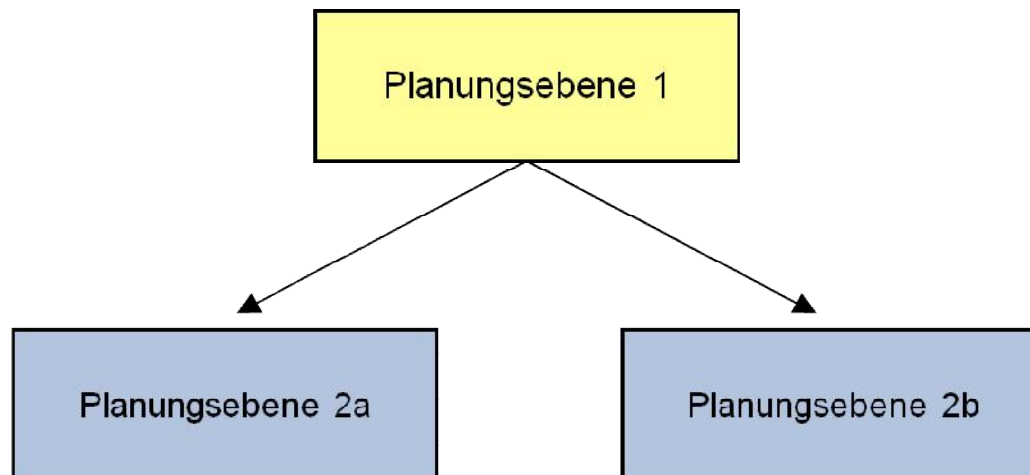

Seite 183, Abb. 12: Retrogrades (top-down) Planung

# KAPITEL C: UNTERNEHMENSFÜHRUNG UND ORGANISATION

## 2. UNTERNEHMENSFÜHRUNG

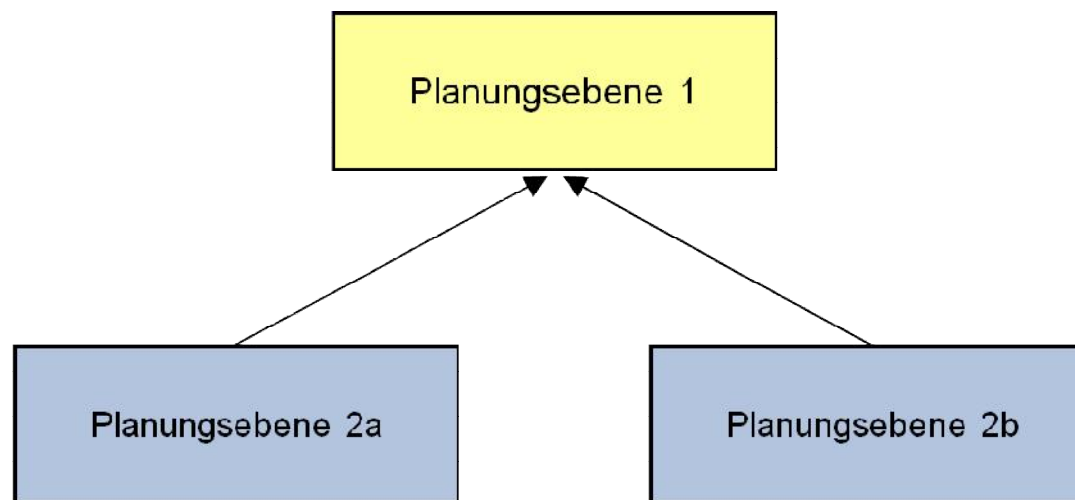

Seite 183, Abb. 13: Progressive (bottom-up) Planung



# KAPITEL C: UNTERNEHMENSFÜHRUNG UND ORGANISATION

## 2. UNTERNEHMENSFÜHRUNG

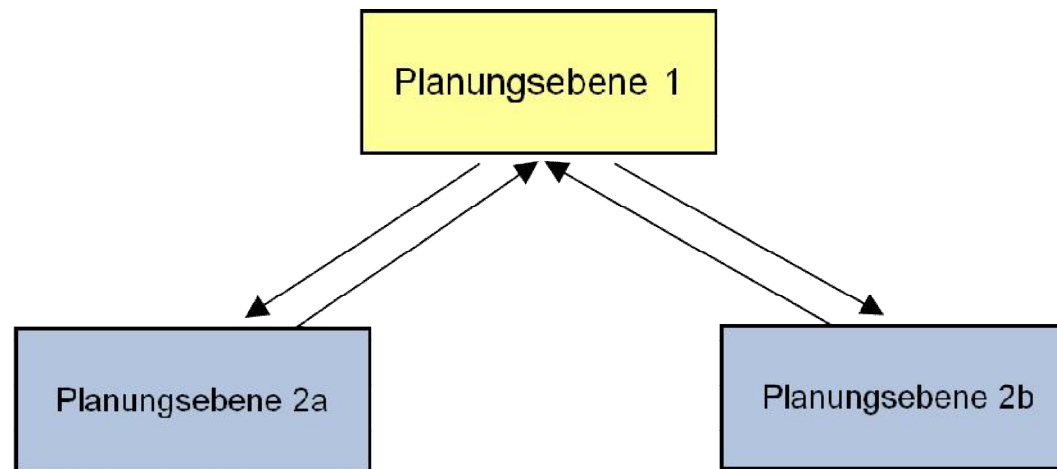

Seite 183, Abb. 14: Gegenstromplanung

## KAPITEL C: UNTERNEHMENSFÜHRUNG UND ORGANISATION

### 2. UNTERNEHMENSFÜHRUNG

| <div>Handlungs-<br/>dimension</div> <div>Handlungs-<br/>möglichkeiten</div> | Gewinn in<br>EUR | Zeit in<br>Jahren |
|-----------------------------------------------------------------------------|------------------|-------------------|
| Marktausweitung                                                             | 450.000          | 7                 |
| Rationalisierung                                                            | 410.000          | 5                 |

Seite 189, Abb. 15: Beispiel für eine Ergebnismatrix

# KAPITEL C: UNTERNEHMENSFÜHRUNG UND ORGANISATION

## 2. UNTERNEHMENSFÜHRUNG

| Handlungsmöglichkeiten | Ergebnisse vor Nutzenermittlung | Ermittelter Nutzen [EUR] |
|------------------------|---------------------------------|--------------------------|
| Marktausweitung        | 450.000                         | 263.000                  |
| Rationalisierung       | 410.000                         | 279.000                  |

Seite 190, Abb. 16: Beispiel für eine Entscheidungsmatrix

## KAPITEL C: UNTERNEHMENSFÜHRUNG UND ORGANISATION

### 2. UNTERNEHMENSFÜHRUNG

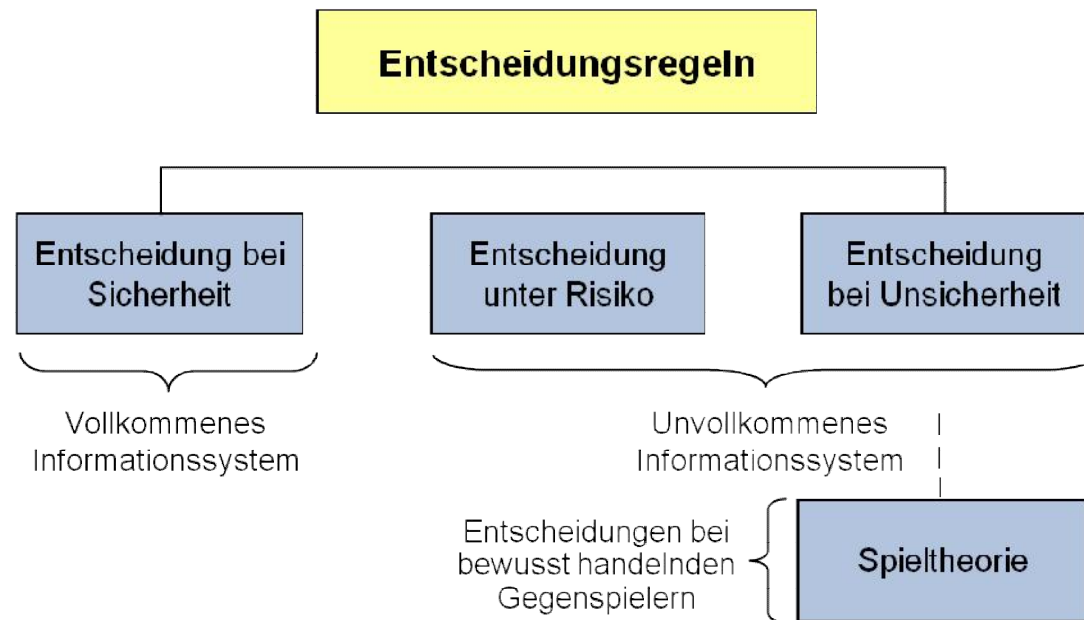

Seite 190, Abb. 17: Entscheidungssituationen

## KAPITEL C: UNTERNEHMENSFÜHRUNG UND ORGANISATION

### 2. UNTERNEHMENSFÜHRUNG

| <div>Umwelt-<br/>bedingungen</div> <div>Handlungs-<br/>möglichkeiten</div> | $Z_1$ | $Z_2$ |
|----------------------------------------------------------------------------|-------|-------|
| $A_1$                                                                      | 120   | 180   |
| $A_2$                                                                      | 80    | 75    |
| $A_3$                                                                      | 100   | 20    |

Seite 191, Abb. 18: Beispiel für eine Entscheidung unter Sicherheit

# KAPITEL C: UNTERNEHMENSFÜHRUNG UND ORGANISATION

## 2. UNTERNEHMENSFÜHRUNG

| Handlungs-<br>möglichkeiten | Umweltzustände     |                |                | Erwartungs-<br>Werte                 |
|-----------------------------|--------------------|----------------|----------------|--------------------------------------|
|                             | Z <sub>1</sub>     | Z <sub>2</sub> | Z <sub>3</sub> |                                      |
|                             | Wahrscheinlichkeit |                |                |                                      |
|                             | 0,3                | 0,6            | 0,1            |                                      |
| A <sub>1</sub>              | 40                 | 80             | 90             | 40 · 0,3 + 80 · 0,6 + 90 · 0,1 = 69  |
| A <sub>2</sub>              | 50                 | 30             | 70             | 50 · 0,3 + 30 · 0,6 + 70 · 0,1 = 40  |
| A <sub>3</sub>              | 90                 | 100            | 10             | 90 · 0,3 + 100 · 0,6 + 10 · 0,1 = 88 |

Seite 192, Abb. 19: Beispiel zur Bayes-Regel

## KAPITEL C: UNTERNEHMENSFÜHRUNG UND ORGANISATION

### 2. UNTERNEHMENSFÜHRUNG

| <div>Umwelt-<br/>bedingungen</div> <div>Handlungs-<br/>möglichkeiten</div> | $Z_1$ | $Z_2$ | $Z_3$ |
|----------------------------------------------------------------------------|-------|-------|-------|
| $A_1$                                                                      | 15    | 30    | 60    |
| $A_2$                                                                      | 20    | 10    | 40    |
| $A_3$                                                                      | 50    | 40    | 25    |

Seite 193, Abb. 20: Beispiel Ergebnismatrix

# KAPITEL C: UNTERNEHMENSFÜHRUNG UND ORGANISATION

## 2. UNTERNEHMENSFÜHRUNG

| Handlungsmöglichkeiten | Zeilenminima |
|------------------------|--------------|
| $A_1$                  | 15           |
| $A_2$                  | 10           |
| $A_3$                  | 25           |

← Maximum

Seite 193, Abb. 21: Entscheidungsmatrix nach der Maximin-Regel



# KAPITEL C: UNTERNEHMENSFÜHRUNG UND ORGANISATION

## 2. UNTERNEHMENSFÜHRUNG

| Handlungsmöglichkeiten | Zeilenmaxima |                                                                                                       |
|------------------------|--------------|-------------------------------------------------------------------------------------------------------|
| $A_1$                  | 60           | <u>Maximum</u><br> |
| $A_2$                  | 40           |                                                                                                       |
| $A_3$                  | 50           |                                                                                                       |

Seite 194, Abb. 22: Entscheidungsmatrix nach der Maximax-Regel

# KAPITEL C: UNTERNEHMENSFÜHRUNG UND ORGANISATION

## 2. UNTERNEHMENSFÜHRUNG

| Handlungsmöglichkeiten | Zeilenmaxima<br>$\times \text{Alpha}$ | Zeilenminima<br>$\times (1-\text{Alpha})$ | Summe             |           |
|------------------------|---------------------------------------|-------------------------------------------|-------------------|-----------|
| $A_1$                  | $60 \cdot 0,7 = 42$                   | $15 \cdot 0,3 = 4,5$                      | $42 + 4,5 = 46,5$ | Maximum ← |
| $A_2$                  | $40 \cdot 0,7 = 28$                   | $10 \cdot 0,3 = 3,0$                      | $28 + 3,0 = 31,0$ |           |
| $A_3$                  | $50 \cdot 0,7 = 35$                   | $25 \cdot 0,3 = 7,5$                      | $35 + 7,5 = 42,5$ |           |

Seite 194, Abb. 23: Entscheidungsmatrix nach der Pessimismus-Optimismus-Regel

## KAPITEL C: UNTERNEHMENSFÜHRUNG UND ORGANISATION

### 2. UNTERNEHMENSFÜHRUNG

| Spaltenmaxima<br>aus Abb. 20                                               | 50                               | 40    | 60    |                     |
|----------------------------------------------------------------------------|----------------------------------|-------|-------|---------------------|
| <div>Umweltbe-<br/>dingungen</div> <div>Handlungs-<br/>möglichkeiten</div> | Differenz Spaltenmaxima – Nutzen |       |       | Maximales<br>Risiko |
|                                                                            | $Z_1$                            | $Z_2$ | $Z_3$ |                     |
| $A_1$                                                                      | 35                               | 10    | 0     | 35                  |
| $A_2$                                                                      | 30                               | 30    | 20    | <b>30</b>           |
| $A_3$                                                                      | 0                                | 0     | 35    | 35                  |

← Minimum

Seite 195, Abb. 24: Entscheidungsmatrix nach der Savage-Niehans-Regel

# KAPITEL C: UNTERNEHMENSFÜHRUNG UND ORGANISATION

## 2. UNTERNEHMENSFÜHRUNG

| Handlungsmöglichkeiten | $Z_1$ | $Z_2$ | $Z_3$ | Erwartungswerte                                     |
|------------------------|-------|-------|-------|-----------------------------------------------------|
|                        | 0,3   | 0,3   | 0,3   |                                                     |
| $A_1$                  | 15    | 30    | 60    | $15 \cdot 0,3 + 30 \cdot 0,3 + 60 \cdot 0,3 = 31,5$ |
| $A_2$                  | 20    | 10    | 40    | $20 \cdot 0,3 + 10 \cdot 0,3 + 40 \cdot 0,3 = 21,0$ |
| $A_3$                  | 50    | 40    | 25    | $50 \cdot 0,3 + 40 \cdot 0,3 + 25 \cdot 0,3 = 34,5$ |

**Maximum** ←

Seite 196, Abb. 25: Entscheidungsmatrix nach der Laplace-Regel

## KAPITEL C: UNTERNEHMENSFÜHRUNG UND ORGANISATION

### 2. UNTERNEHMENSFÜHRUNG

| <div>Umwelt-<br/>bedingungen</div> <div>Handlungs-<br/>möglichkeiten</div> | S1=(3,0) | S2=(2,1) | S3=(1,2) | S4=(0,3) |
|----------------------------------------------------------------------------|----------|----------|----------|----------|
| $A_1 = (4,0)$                                                              | 4        | 2        | 1        | 0        |
| $A_2 = (3,1)$                                                              | 1        | 3        | 0        | -1       |
| $A_3 = (2,2)$                                                              | -2       | 2        | 2        | -2       |
| $A_4 = (1,3)$                                                              | -1       | 0        | 3        | 1        |
| $A_5 = (0,4)$                                                              | 0        | 1        | 2        | 2        |

Seite 197, Abb. 26: Ergebnismatrix

## KAPITEL C: UNTERNEHMENSFÜHRUNG UND ORGANISATION

### 2. UNTERNEHMENSFÜHRUNG

| <div>Umwelt-<br/>bedingungen</div> <div>Handlungs-<br/>möglichkeiten</div> | S1=(3,0) | S2=(2,1) | S3=(1,2) | S4=(0,3) |
|----------------------------------------------------------------------------|----------|----------|----------|----------|
| $A_1 = (4,0)$                                                              | 4        | 2        | 1        | 0        |
| $A_2 = (3,1)$                                                              | 1        | 3        | 0        | -1       |
| $A_3 = (2,2)$                                                              | -2       | 2        | 2        | -2       |
| $A_4 = (1,3)$                                                              | -1       | 0        | 3        | 1        |
| $A_5 = (0,4)$                                                              | 0        | 1        | 2        | 2        |

Seite 197, Abb. 26: Ergebnismatrix

# KAPITEL C: UNTERNEHMENSFÜHRUNG UND ORGANISATION

## 2. UNTERNEHMENSFÜHRUNG

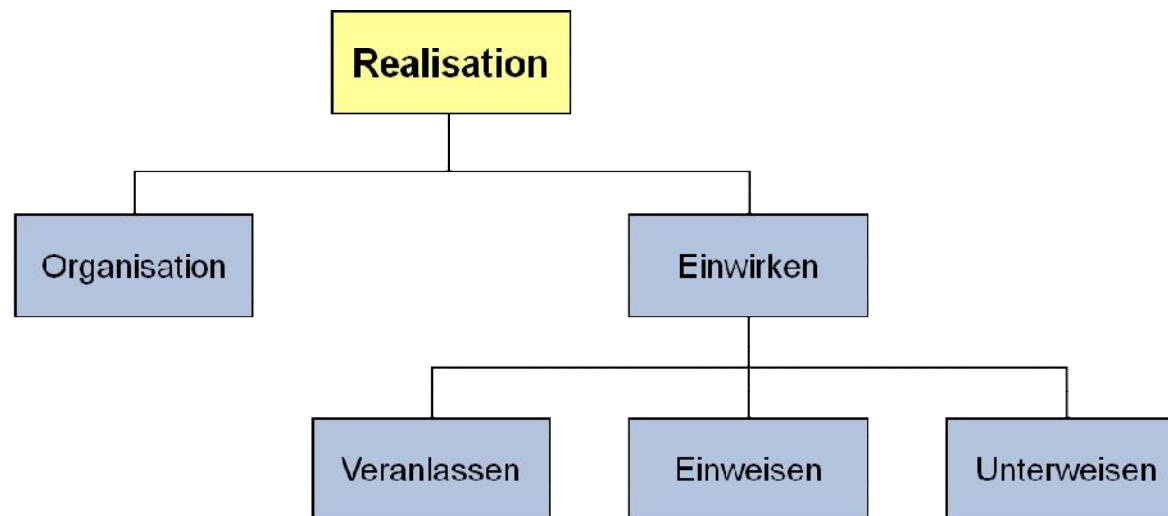

Seite 201, Abb. 27: Teilbereiche der Realisation

## KAPITEL C: UNTERNEHMENSFÜHRUNG UND ORGANISATION

### 2. UNTERNEHMENSFÜHRUNG

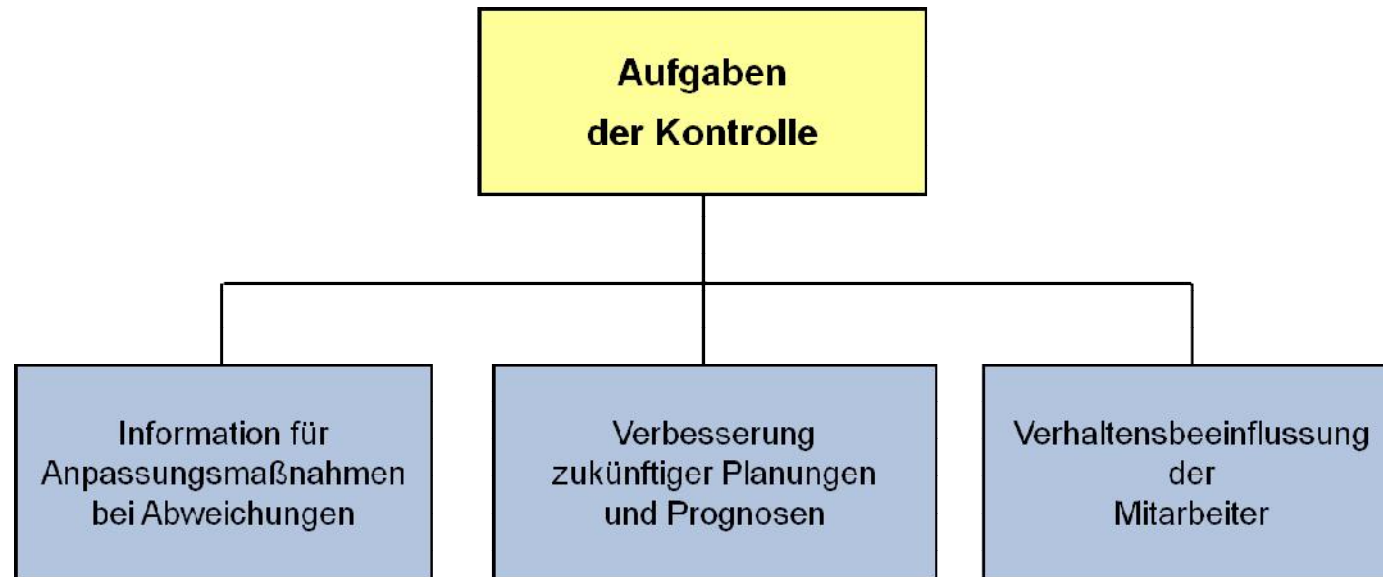

Seite 202, Abb. 28: Aufgaben der Kontrolle



# KAPITEL C: UNTERNEHMENSFÜHRUNG UND ORGANISATION

## 2. UNTERNEHMENSFÜHRUNG

| Kriterien                          | Kontrolle                             | Revision                                |
|------------------------------------|---------------------------------------|-----------------------------------------|
| Zeitbezogenheit                    | Gegenwartsbezogen                     | Vergangenheitsbezogen                   |
| Häufigkeit der Durchführung        | Ständige Einrichtung                  | Einmaliger Vorgang                      |
| Arbeitsweise                       | Durch Menschen oder Automat           | Nur durch Mensch                        |
| Abhängigkeit des Kontrollsubjektes | Vom Kontrollobjekt abhängige Personen | Vom Kontrollobjekt unabhängige Personen |
| Einbau in betriebliche Abläufe     | Eingebaut (systemimmanent)            | Nicht eingebaut (systemfremd)           |

Seite 204, Abb. 29: Revision und Kontrolle  
(in Anlehnung an Thommen J.-P.: Managementorientierte Betriebswirtschaftslehre, Zürich 2000)

# KAPITEL C: UNTERNEHMENSFÜHRUNG UND ORGANISATION

## 2. UNTERNEHMENSFÜHRUNG

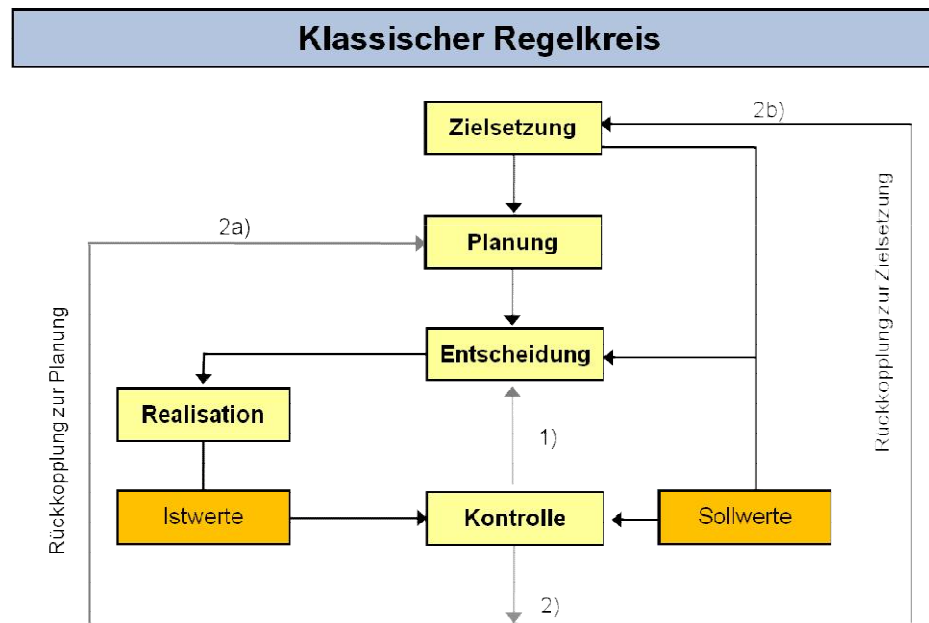

Seite 207, Abb. 30: Klassischer Regelkreis

## KAPITEL C: UNTERNEHMENSFÜHRUNG UND ORGANISATION

### 2. UNTERNEHMENSFÜHRUNG

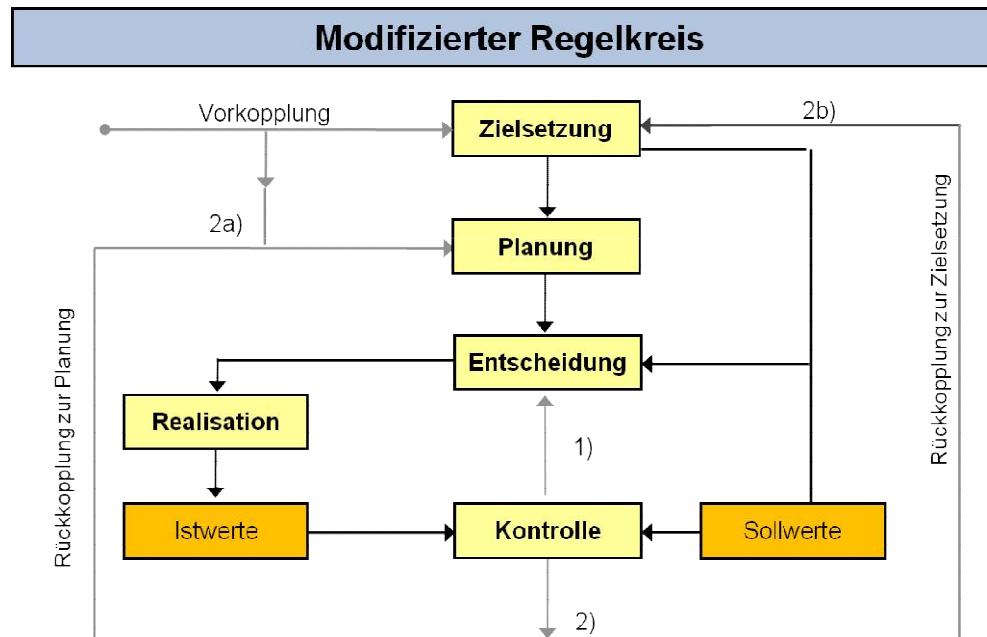

Seite 208, Abb. 31: Modifizierter Regelkreis

## KAPITEL C: UNTERNEHMENSFÜHRUNG UND ORGANISATION

### 2. UNTERNEHMENSFÜHRUNG

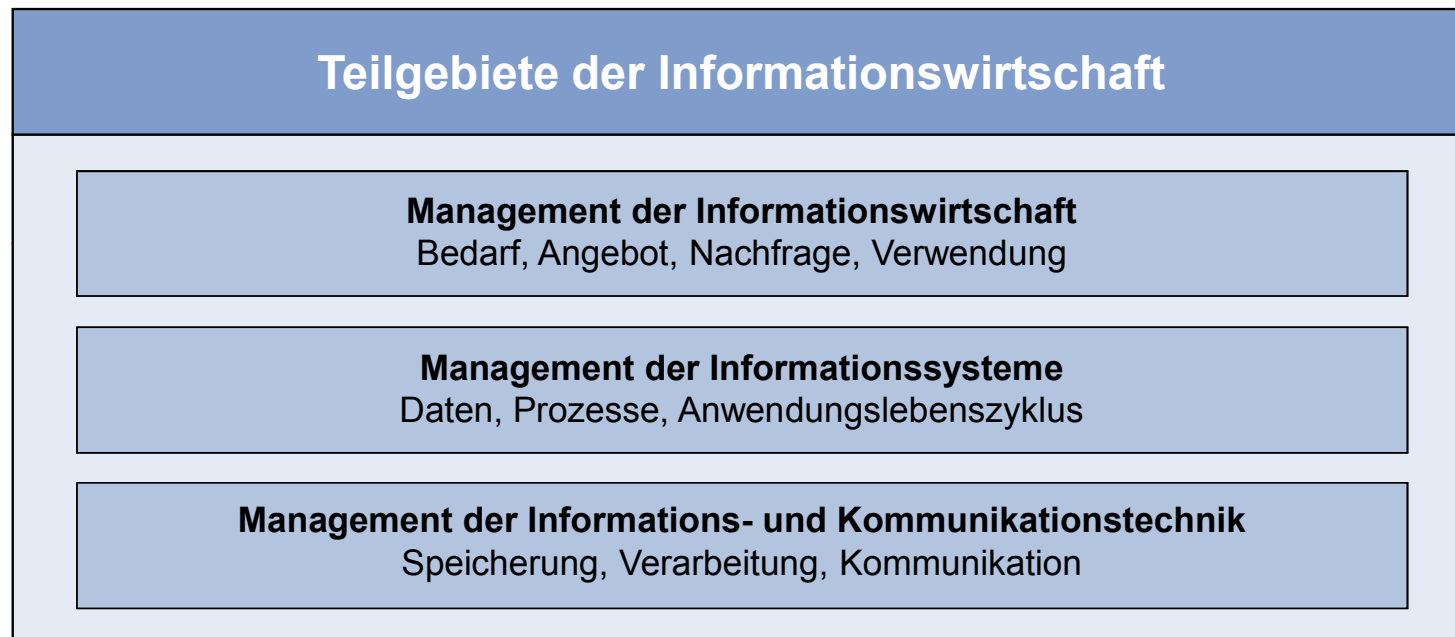

Seite 210, Abb. 32: Teilgebiete der Informationswirtschaft nach Kremar  
(in Anlehnung an Kremar, H.: Informationsmanagement, 3. Aufl., Berlin 2005)

## KAPITEL C: UNTERNEHMENSFÜHRUNG UND ORGANISATION

### 2. UNTERNEHMENSFÜHRUNG

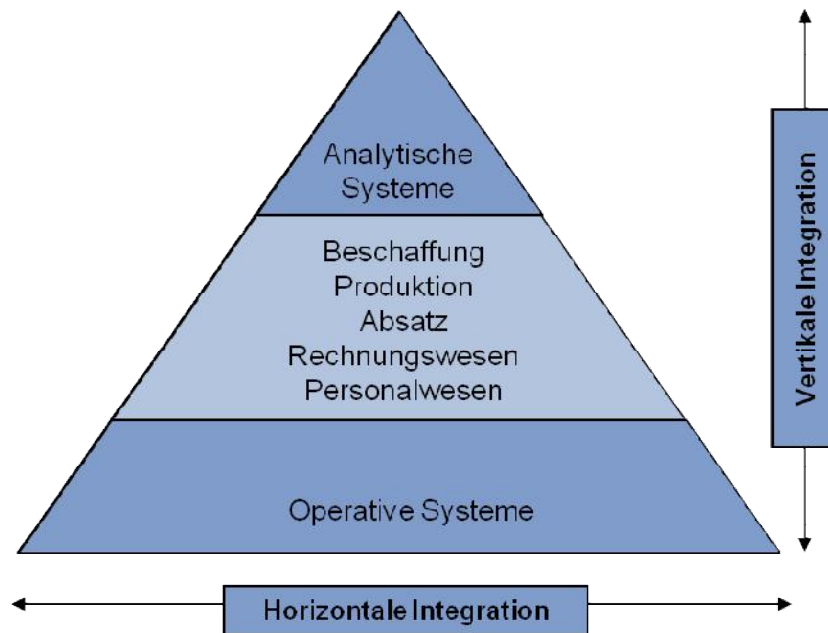

Seite 212, Abb. 33: Horizontale und vertikale Integration  
(Vgl. Hansen, R./Neumann, G.: Wirtschaftsinformatik 1. Grundlagen und Anwendungen, 9. Aufl., Stuttgart 2005, S. 94)

*Jung: Allgemeine Betriebswirtschaftslehre. De Gruyter Oldenbourg 2016. ISBN 978-3-486-76376-8*

## KAPITEL C: UNTERNEHMENSFÜHRUNG UND ORGANISATION

### 2. UNTERNEHMENSFÜHRUNG

#### Verbindung operativer und analytischer Systeme

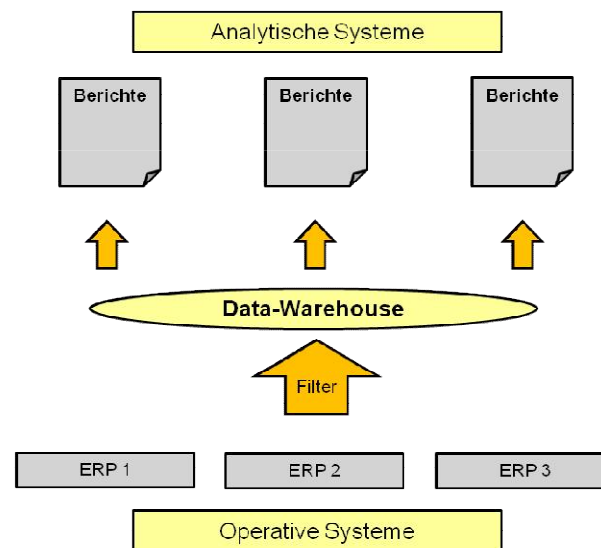

Seite 214, Abb. 34: Verbindungen operativer und analytischer Systeme  
(Vgl. Wöhe, G.: Einführung in die Allgemeine Betriebswirtschaftslehre, 23. Aufl., München 2008, S. 181)

# KAPITEL C: UNTERNEHMENSFÜHRUNG UND ORGANISATION

## 2. UNTERNEHMENSFÜHRUNG

| Merkmale                    | Informationssystem                                    |                                                         |
|-----------------------------|-------------------------------------------------------|---------------------------------------------------------|
|                             | operativ                                              | analytisch                                              |
| <b>Aufgabenstellung</b>     | Erledigung von Routineaufgaben                        | Informationsbereitstellung für Einzelfallentscheidungen |
| <b>Organisationsbereich</b> | Operatives Tagesgeschäft                              | Unternehmensführung                                     |
| <b>Anwendungsbereich</b>    | Computergestützte Prozessabwicklung durch ERP-Systeme | Datenbereitstellung durch Data-Warehouse                |

Seite 214, Abb. 35: Vergleich operativer und analytischer Informationssysteme  
(Vgl. Wöhe, G.: Einführung in die Allgemeine Betriebswirtschaftslehre, 23. Aufl., München 2008, S. 204)

## KAPITEL C: UNTERNEHMENSFÜHRUNG UND ORGANISATION

### 2. UNTERNEHMENSFÜHRUNG

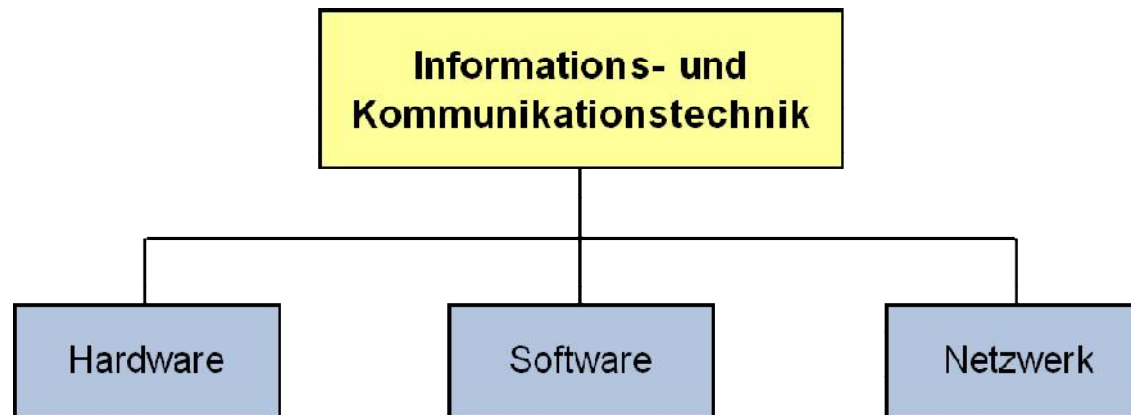

Seite 215, Abb. 36: Bestandteile der Informations- und Kommunikationstechnik



# KAPITEL C: UNTERNEHMENSFÜHRUNG UND ORGANISATION

## 2. UNTERNEHMENSFÜHRUNG

| Vorteile beim Einsatz des Internet                                                        | Anwendungsgebiete                                                               |
|-------------------------------------------------------------------------------------------|---------------------------------------------------------------------------------|
| Direkte Kundenansprache, höhere Kundenbindung, Erschließung zusätzlichen Kundenpotenzials | Direktmarketing über neue Medien wie E-Mail oder Voice over IP                  |
| Rationalisierungspotentiale durch Substitution (Internetportale statt Filialen)           | Online- Banking, Online- Brokerage                                              |
| Senkung der Transaktionskosten bei der Abwicklung von Geschäftsbeziehungen                | Electronic Commerce (z.B. Business to Consumer, Business to Business)           |
| Ständige Erreichbarkeit unabhängig von zeitlichen und örtlichen Restriktionen             | Regionale Anbieter, eingeschränkte Ladenöffnungszeiten                          |
| Wegfall von Fahrtzeiten und Fahrtkosten                                                   | Heim- und Telearbeit                                                            |
| Automatisierung von Prozessen                                                             | Elektronischer Austausch von Geschäftsdaten (Electronic Data Interchange - EDI) |
| Verbesserte Informationsbeschaffung für betriebliche Entscheidungen                       | Informationsbeschaffung (Erlangung von Internetadressen über Suchbegriffe)      |
| Kürzere und kostengünstigere Informationswege                                             | Kommunikation via E-Mail, VoIP, Instant Messenger                               |

Seite 215, Abb. 37: Vorteile und Anwendungsgebiete des Internets  
(in Anlehnung an Wöhe, G., Einführung in die allgemeine Betriebswirtschaftslehre, 23. Auflage, München 2008)

*Jung: Allgemeine Betriebswirtschaftslehre. De Gruyter Oldenbourg 2016. ISBN 978-3-486-76376-8*

# KAPITEL C: UNTERNEHMENSFÜHRUNG UND ORGANISATION

## 2. UNTERNEHMENSFÜHRUNG

|          |                | Nachfrager                                                                                                      |                                                                                                                               |                                                                                                                                         |
|----------|----------------|-----------------------------------------------------------------------------------------------------------------|-------------------------------------------------------------------------------------------------------------------------------|-----------------------------------------------------------------------------------------------------------------------------------------|
|          |                | Consumer                                                                                                        | Business                                                                                                                      | Administration                                                                                                                          |
| Anbieter | Consumer       | <b>C2C</b><br><b>(Consumer-to-Consumer)</b><br>z.B. Internet-Kleinanzeigenmarkt                                 | <b>C2B</b><br><b>(Consumer-to-Business)</b><br>z.B. Jobbörsen mit Prämien, freie Mitarbeiter                                  | <b>C2A</b><br><b>(Consumer-to-Administration)</b><br>z.B. Steuer-rück-zahlungen, Unterstützungsleistungen                               |
|          | Business       | <b>B2C</b><br><b>(Business-to-Consumer)</b><br>z.B. Händler bietet Ware oder Dienstleistung an                  | <b>B2B</b><br><b>(Business-to-Business)</b><br>z.B. Geschäfte zwischen Zulieferern (Unternehmen) und Unternehmen              | <b>B2A</b><br><b>(Business-to-Administration)</b><br>z.B. Beschaffungsmaßnahmen öffentlicher Institutionen im Internet, Ausschreibungen |
|          | Administration | <b>A2C</b><br><b>(Administration-to-Consumer)</b><br>z.B. Steuerabwicklung von Privatpersonen (Einkommensteuer) | <b>A2B</b><br><b>(Administration-to-Business)</b><br>z.B. Steuerabwicklung von Unternehmen (Umsatzsteuer, Körperschaftsteuer) | <b>A2A</b><br><b>(Administration-to-Administration)</b><br>z.B. Transaktionen zwischen öffentlichen Institutionen im In- und Ausland    |

Seite 216, Abb. 38: Typen des E-Commerce

# KAPITEL C: UNTERNEHMENSFÜHRUNG UND ORGANISATION

## 2. UNTERNEHMENSFÜHRUNG

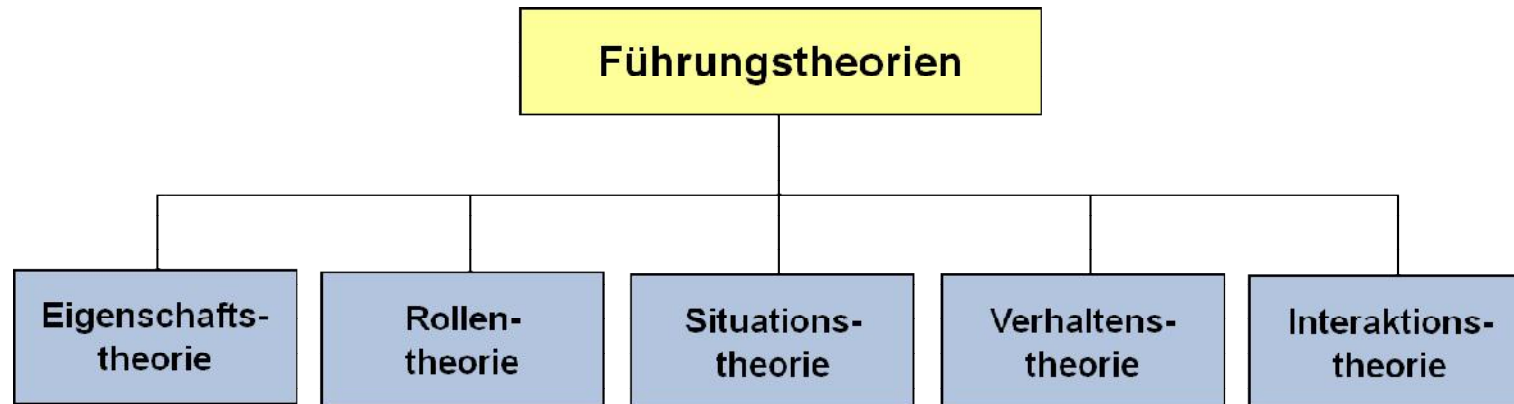

Seite 217, Abb. 39: Führungstheorien

## KAPITEL C: UNTERNEHMENSFÜHRUNG UND ORGANISATION

### 2. UNTERNEHMENSFÜHRUNG

|                                     |                                |
|-------------------------------------|--------------------------------|
| <b>Klassische<br/>Führungsstile</b> | Autoritärer Führungsstil       |
|                                     | Kooperativer Führungsstil      |
|                                     | Laissez-faire-Führungsstil     |
|                                     | Patriarchalischer Führungsstil |
|                                     | Charismatischer Führungsstil   |
|                                     | Autokratischer Führungsstil    |
|                                     | Bürokratischer Führungsstil    |

Seite 220, Abb. 40: Klassische Führungsstiltypologien

# KAPITEL C: UNTERNEHMENSFÜHRUNG UND ORGANISATION

## 2. UNTERNEHMENSFÜHRUNG

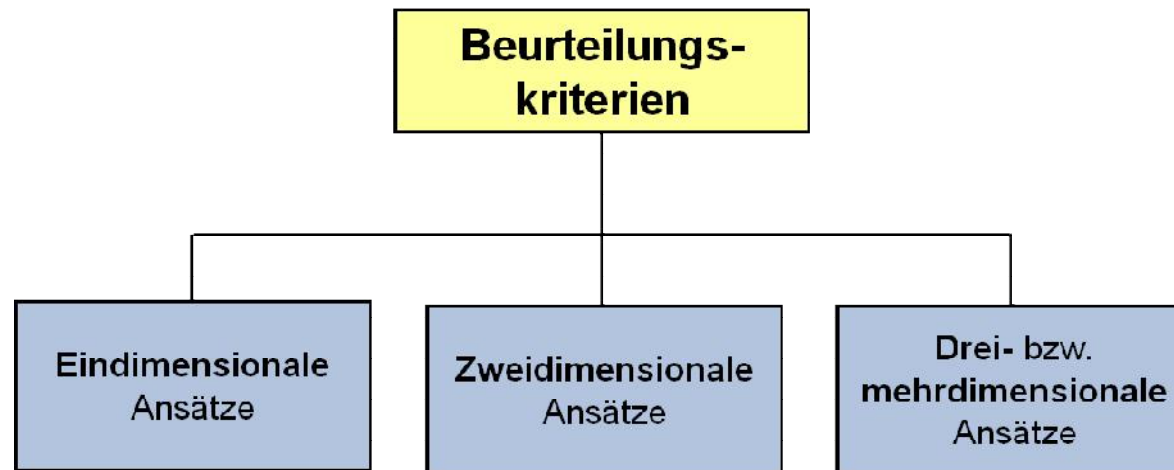

Seite 223, Abb. 41: Beurteilungskriterien von Führungsstilen

## KAPITEL C: UNTERNEHMENSFÜHRUNG UND ORGANISATION

### 2. UNTERNEHMENSFÜHRUNG

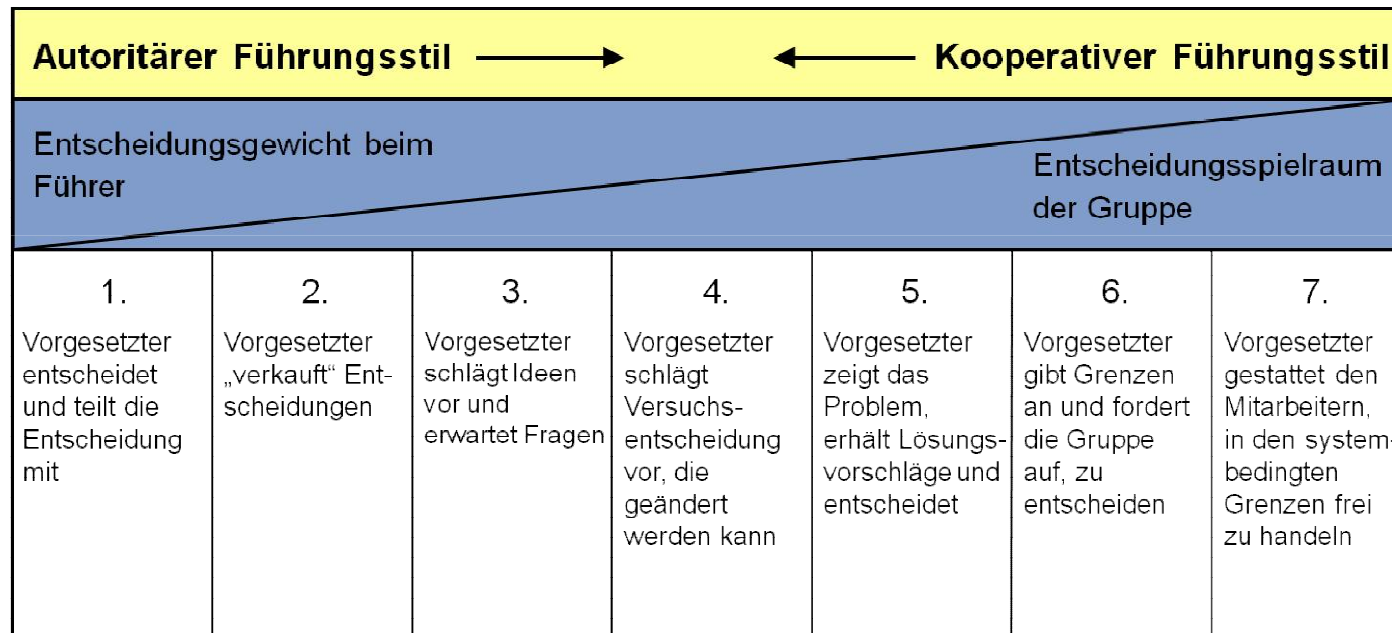

Seite 224, Abb. 42: Kontinuumtheorie von Tannenbaum/Schmidt

## KAPITEL C: UNTERNEHMENSFÜHRUNG UND ORGANISATION

### 2. UNTERNEHMENSFÜHRUNG

| Dimension                | Ohio-Gruppe          | Michigan-Gruppe        |
|--------------------------|----------------------|------------------------|
| Mitarbeiter-orientierung | Consideration        | Employee Orientation   |
| Aufgaben-orientierung    | Initialing Structure | Production Orientation |

Seite 225, Abb. 43: Zweidimensionale Führungsstile

# KAPITEL C: UNTERNEHMENSFÜHRUNG UND ORGANISATION

## 2. UNTERNEHMENSFÜHRUNG

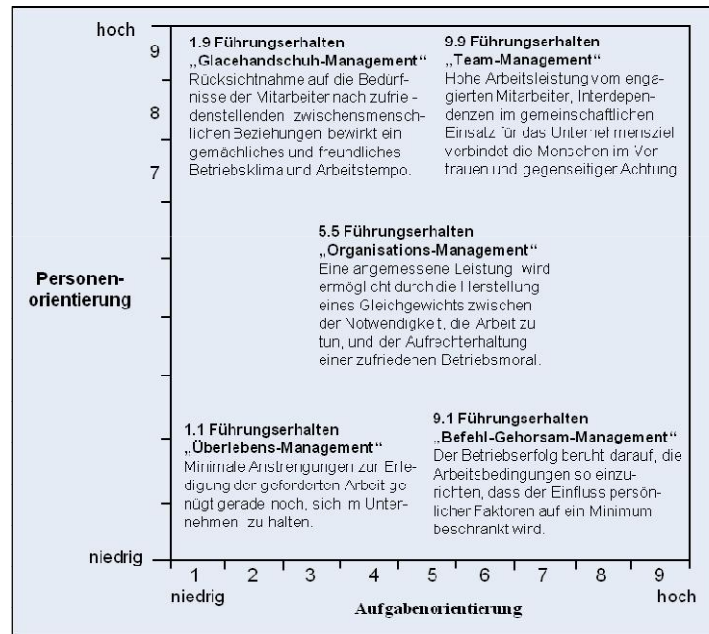

Seite 226, Abb. 44: Verhaltensgitter nach Blake/Mouton



## KAPITEL C: UNTERNEHMENSFÜHRUNG UND ORGANISATION

### 2. UNTERNEHMENSFÜHRUNG

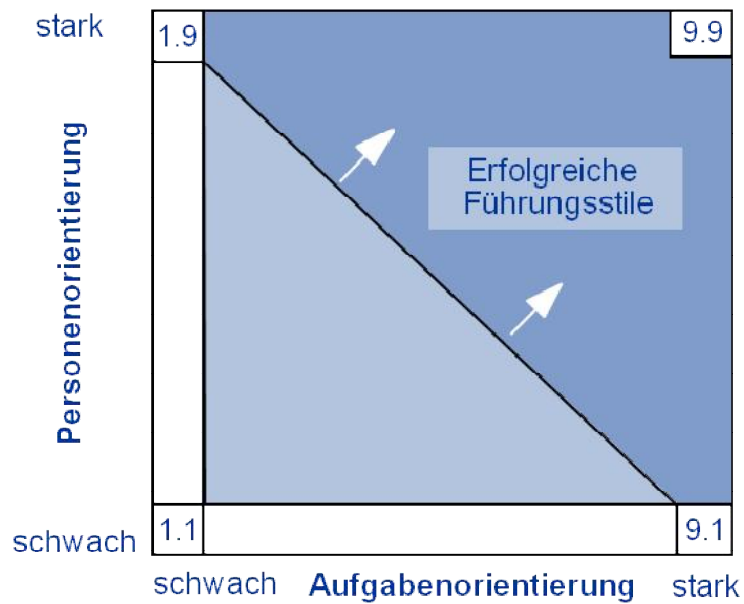

Seite 227, Abb. 45: Darstellung erfolgreicher Führungsstile im Verhaltensgitter

## KAPITEL C: UNTERNEHMENSFÜHRUNG UND ORGANISATION

### 2. UNTERNEHMENSFÜHRUNG

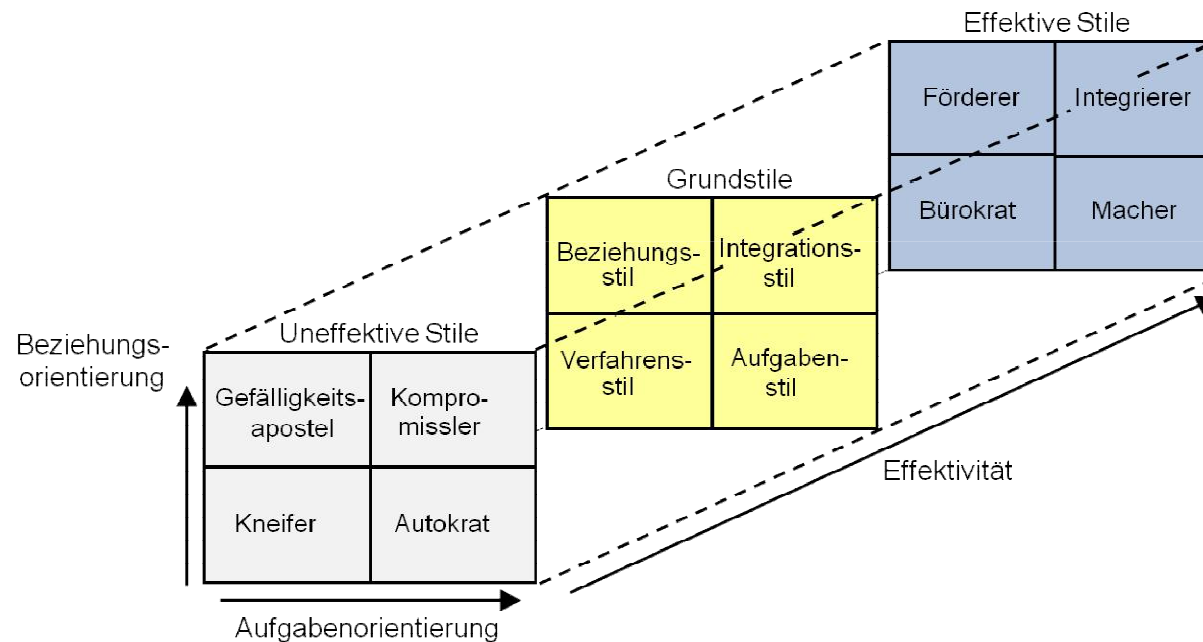

Seite 229, Abb. 46: Die 3-D-Theorie der Führung von Reddin  
(in Anlehnung an Reddin, W. J.: Das 3-D-Programm zur Leistungssteigerung des Managements,  
Landsberg/ Lech 1981)

Jung: Allgemeine Betriebswirtschaftslehre. De Gruyter Oldenbourg 2016. ISBN 978-3-486-76376-8

## KAPITEL C: UNTERNEHMENSFÜHRUNG UND ORGANISATION

### 2. UNTERNEHMENSFÜHRUNG

|                                  | <b>Geringe<br/>Motivation</b> | <b>Hohe<br/>Motivation</b> |
|----------------------------------|-------------------------------|----------------------------|
| <b>Geringe<br/>Qualifikation</b> | M1                            | M2                         |
| <b>Hohe<br/>Qualifikation</b>    | M3                            | M4                         |

Seite 230, Abb. 47: Reifegrad des Mitarbeiters in Abhängigkeit von Motivation und Qualifikation  
(in Anlehnung an Hersey, P./Blanchard, K.H.: Management of organizational behaviour,  
3. Aufl., New York 1977)

*Jung: Allgemeine Betriebswirtschaftslehre. De Gruyter Oldenbourg 2016. ISBN 978-3-486-76376-8*

# KAPITEL C: UNTERNEHMENSFÜHRUNG UND ORGANISATION

## 2. UNTERNEHMENSFÜHRUNG

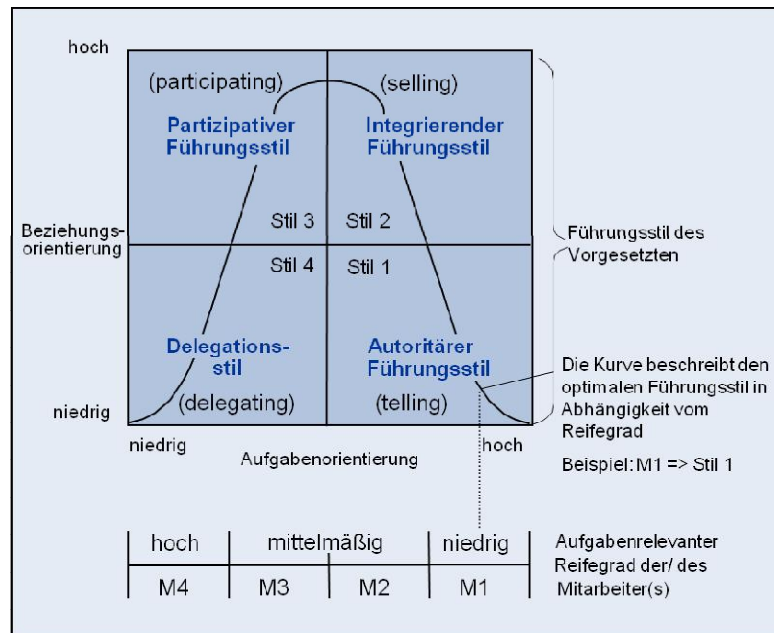

Seite 231, Abb. 48: Reifegrad-Theorie der Führung von Hersey und Blanchard  
(in Anlehnung an Hersey P. / Blanchard, K.H.: Management of organizational behaviour,  
3.Aufl., New York 1977)

Jung: Allgemeine Betriebswirtschaftslehre. De Gruyter Oldenbourg 2016. ISBN 978-3-486-76376-8

# KAPITEL C: UNTERNEHMENSFÜHRUNG UND ORGANISATION

## 2. UNTERNEHMENSFÜHRUNG

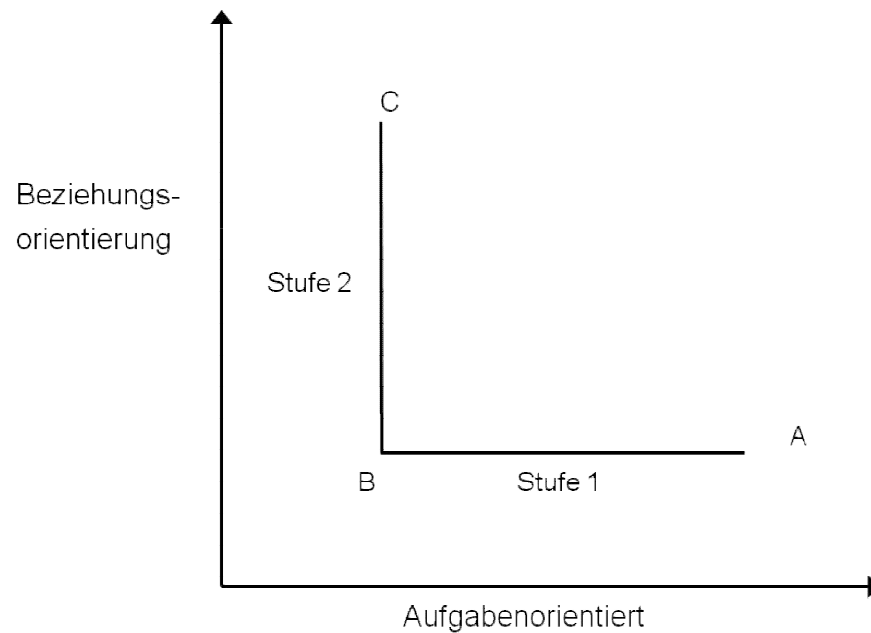

Seite 232, Abb. 49: Zwei-Stufen-Prozess der Mitarbeiterentwicklung

# KAPITEL C: UNTERNEHMENSFÜHRUNG UND ORGANISATION

## 2. UNTERNEHMENSFÜHRUNG

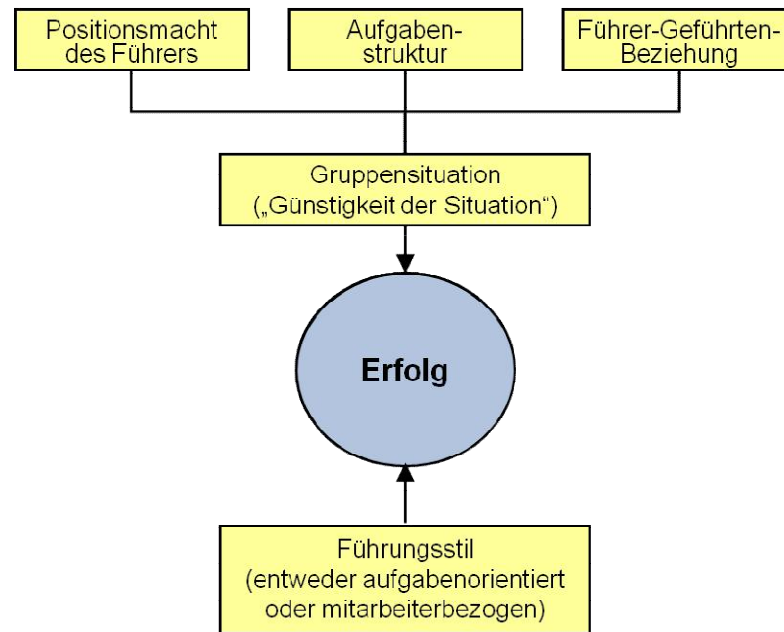

Seite 234, Abb. 50: Einflussgrößen des Führungserfolgs

# KAPITEL C: UNTERNEHMENSFÜHRUNG UND ORGANISATION

## 2. UNTERNEHMENSFÜHRUNG

|           |                               |         |         |         |          |         |         |         |
|-----------|-------------------------------|---------|---------|---------|----------|---------|---------|---------|
| Situation | sehr günstig ←————→ ungünstig |         |         |         |          |         |         |         |
|           | 1                             | 2       | 3       | 4       | 5        | 6       | 7       | 8       |
|           | gut                           |         |         |         | schlecht |         |         |         |
|           | hoch                          |         | niedrig |         | hoch     |         | niedrig |         |
|           | stark                         | schwach | stark   | schwach | stark    | schwach | stark   | schwach |

Seite 232, Abb. 51: Klassifikation der Günstigkeit der Führungssituation

## KAPITEL C: UNTERNEHMENSFÜHRUNG UND ORGANISATION

### 2. UNTERNEHMENSFÜHRUNG

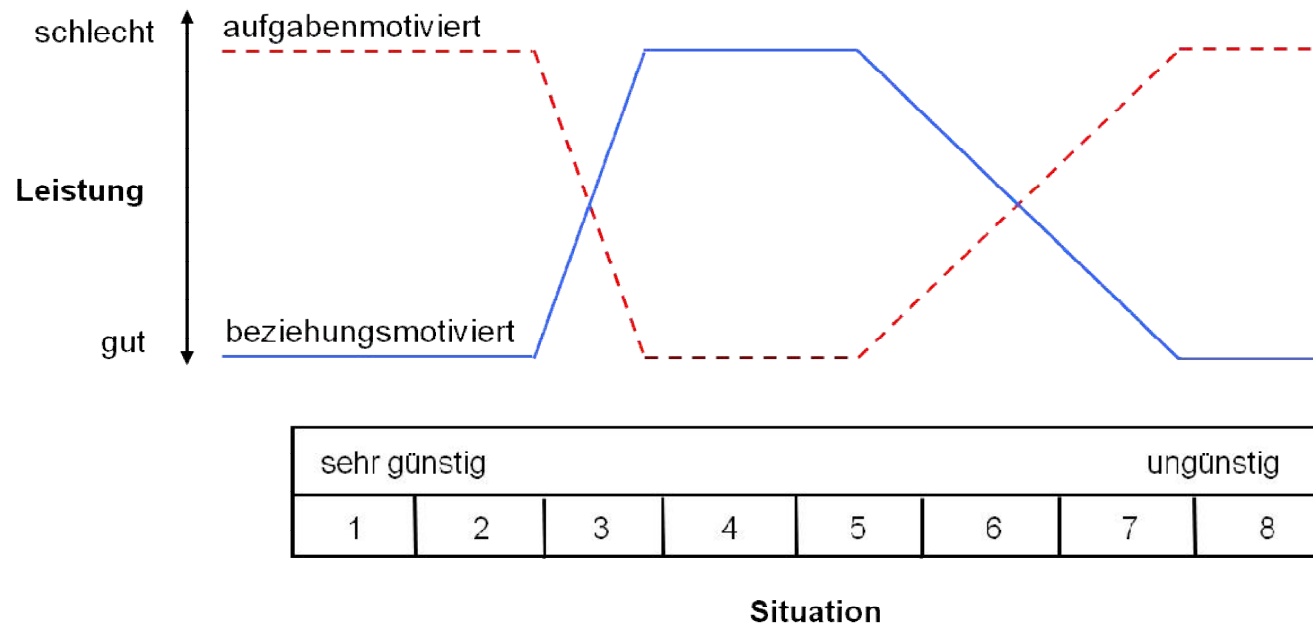

Seite 235, Abb. 52: Kontingenzmodell von Fiedler



## KAPITEL C: UNTERNEHMENSFÜHRUNG UND ORGANISATION

### 2. UNTERNEHMENSFÜHRUNG

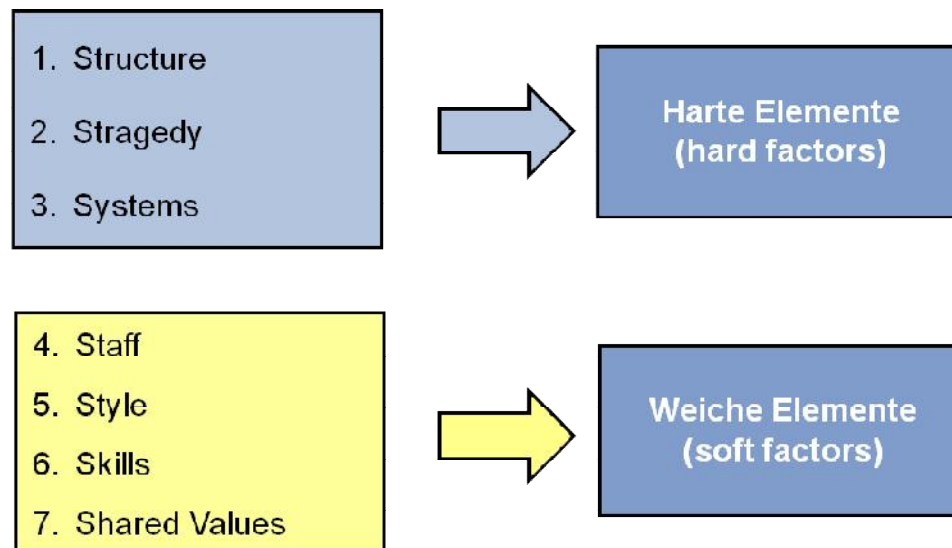

Seite 236, Abb. 53: Die Elemente des 7-S-Modells

# KAPITEL C: UNTERNEHMENSFÜHRUNG UND ORGANISATION

## 2. UNTERNEHMENSFÜHRUNG

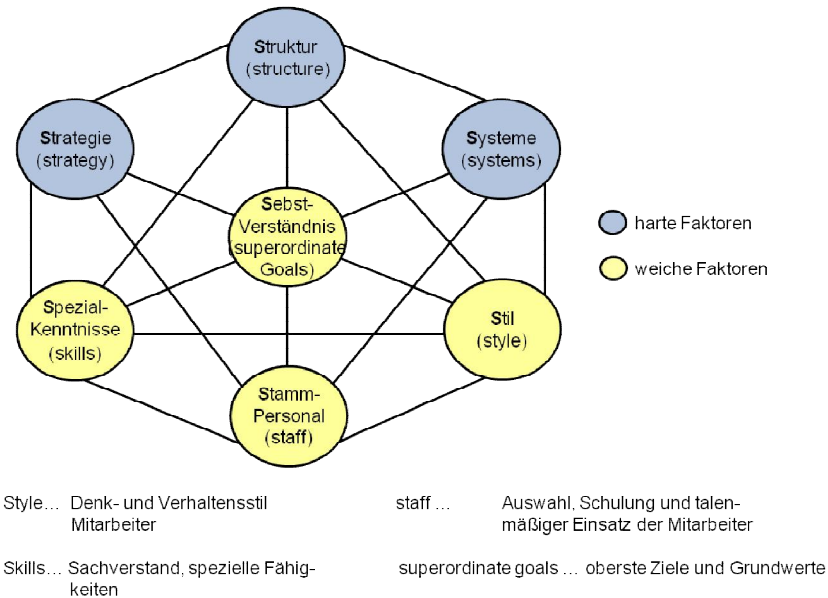

Seite 237, Abb. 54: Das 7-S-Modell

# KAPITEL C: UNTERNEHMENSFÜHRUNG UND ORGANISATION

## 2. UNTERNEHMENSFÜHRUNG

|                                 |                                                                                                                                                                                                                                                               |                                                                                                                                                                                                                                                                                                                |
|---------------------------------|---------------------------------------------------------------------------------------------------------------------------------------------------------------------------------------------------------------------------------------------------------------|----------------------------------------------------------------------------------------------------------------------------------------------------------------------------------------------------------------------------------------------------------------------------------------------------------------|
| <b>Zielbildungs-<br/>phase</b>  | <ul style="list-style-type: none"> <li>- Management <b>by Objectives</b></li> <li>- Management <b>by Participation</b></li> <li>- Management <b>by Decision Rules</b></li> </ul>                                                                              | <ul style="list-style-type: none"> <li>- Führen durch Zielvereinbarungen</li> <li>- Führen durch Partizipation</li> <li>- Führen durch Vorgabe von Entscheidungsregeln</li> </ul>                                                                                                                              |
| <b>Durchsetzungs-<br/>phase</b> | <ul style="list-style-type: none"> <li>- Management <b>by Exception</b></li> <li>- Management <b>by Delegation</b></li> <li>- Management <b>by Systems</b></li> <li>- Management <b>by Breakthrough</b></li> <li>- Management <b>by Motivation</b></li> </ul> | <ul style="list-style-type: none"> <li>- Führen durch Eingreifen im Ausnahmefall</li> <li>- Führen durch Delegation</li> <li>- Führen durch Systemsteuerung</li> <li>- Wandelorientierte Führung</li> <li>- Führen durch systematische Steuerung des Leistungsverhaltens mittels geeigneter Anreize</li> </ul> |
| <b>Kontroll-<br/>phase</b>      | <ul style="list-style-type: none"> <li>- Management <b>by Results</b></li> <li>- Management <b>by Control</b></li> </ul>                                                                                                                                      | <ul style="list-style-type: none"> <li>- Führen durch Ergebniskontrolle</li> <li>- Kontrollorientierte Führung</li> </ul>                                                                                                                                                                                      |

Seite 238, Abb. 55: Managementtechniken in Zusammenhang des Führungsprozesses

# KAPITEL C: UNTERNEHMENSFÜHRUNG UND ORGANISATION

## 2. UNTERNEHMENSFÜHRUNG

| Management by Exception |                                                                                       |
|-------------------------|---------------------------------------------------------------------------------------|
| Fünf-Phasen-Plan        |                                                                                       |
| <b>1. Phase:</b>        | Bestimmung der Messgrößen (als geeignete Indikatoren zur Messung der Zielerreichung)  |
| <b>2. Phase:</b>        | Festlegung der Bewertungsmaßstäbe (als zulässige Abweichungen vom geplanten Ergebnis) |
| <b>3. Phase:</b>        | Ermittlung der Soll-Größen                                                            |
| <b>4. Phase:</b>        | Soll-Ist-Vergleich                                                                    |
| <b>5. Phase:</b>        | Entscheiden (des Vorsetzten bei Überschreiten der Toleranzgrenzen)                    |

Seite 240, Abb. 56: Fünf-Phasen-Plan

## KAPITEL C: UNTERNEHMENSFÜHRUNG UND ORGANISATION

### 2. UNTERNEHMENSFÜHRUNG

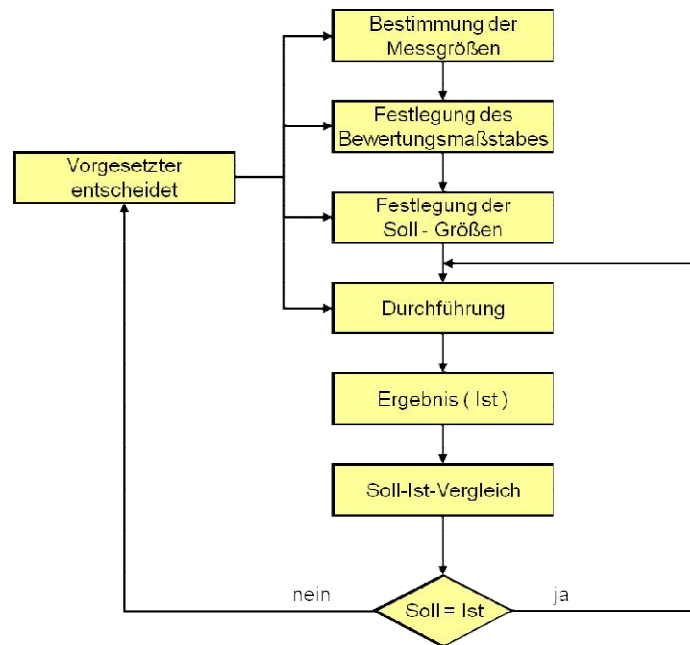

Seite 241, Abb. 57: Ablauf des Management by Exception nach dem 5-Phasen-Plan

## KAPITEL C: UNTERNEHMENSFÜHRUNG UND ORGANISATION

### 2. UNTERNEHMENSFÜHRUNG

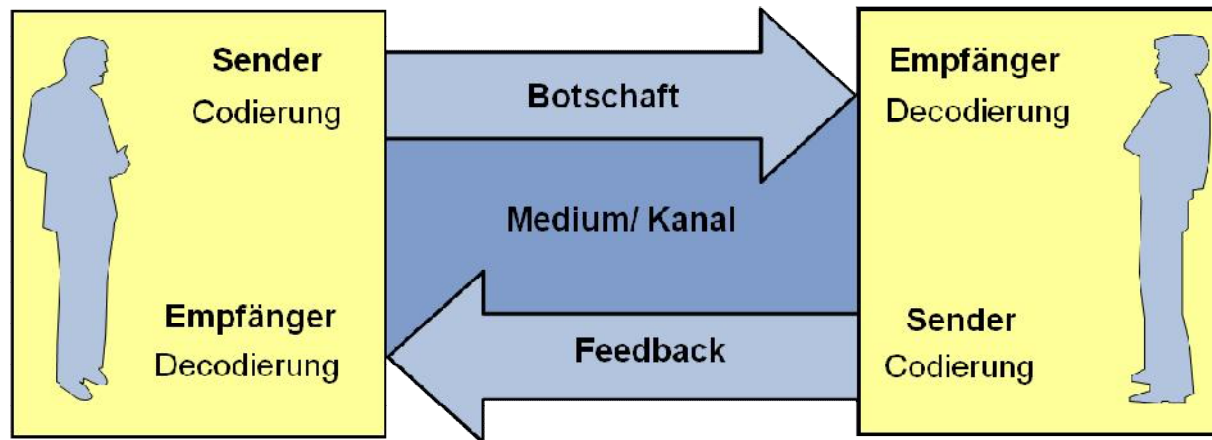

Seite 245, Abb. 58: Kommunikations-Kreislauf

## KAPITEL C: UNTERNEHMENSFÜHRUNG UND ORGANISATION

### 2. UNTERNEHMENSFÜHRUNG

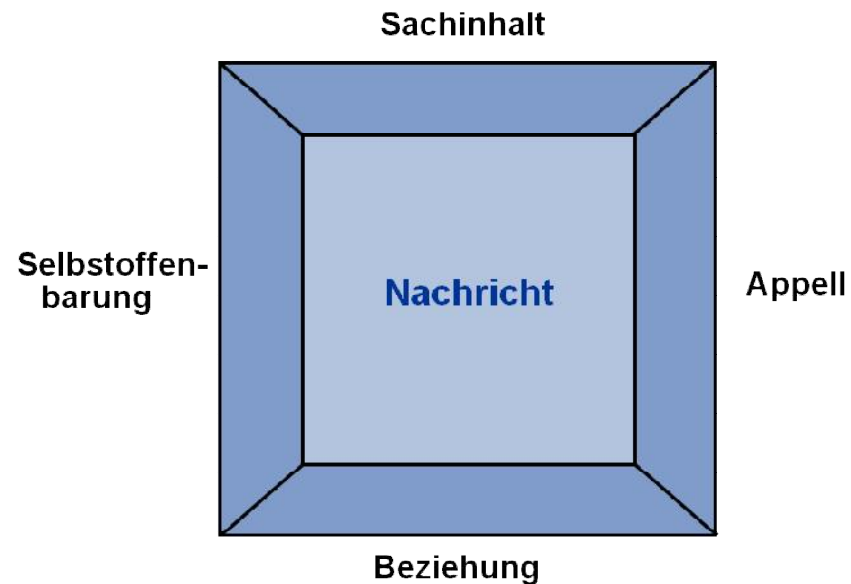

Seite 246, Abb. 59: Die vier Seiten der Nachricht  
(Schulz von Thun, F.: Miteinander reden, Bd. 1: Störungen und Klärungen, Reinbek bei Hamburg 1990, S. 14)

## KAPITEL C: UNTERNEHMENSFÜHRUNG UND ORGANISATION

### 2. UNTERNEHMENSFÜHRUNG

#### Anwendung der Transaktionsanalyse

- sich selbst und die Gesprächspartner besser zu verstehen
- sich in schwierigen Gesprächssituationen richtig zu verhalten

Seite 248, Abb. 60: Anwendung der Transaktionsanalyse



## KAPITEL C: UNTERNEHMENSFÜHRUNG UND ORGANISATION

### 2. UNTERNEHMENSFÜHRUNG

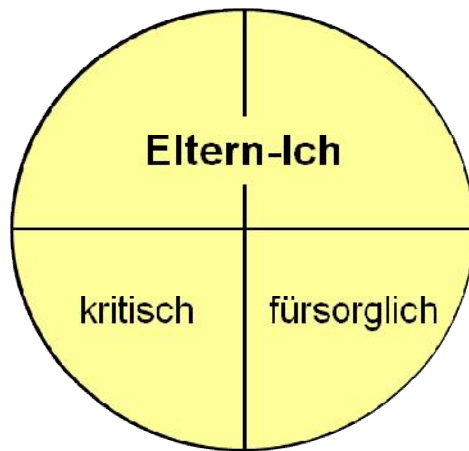

Seite 248, Abb. 61: Zwei Aspekte des Eltern-Ichs

## KAPITEL C: UNTERNEHMENSFÜHRUNG UND ORGANISATION

### 2. UNTERNEHMENSFÜHRUNG

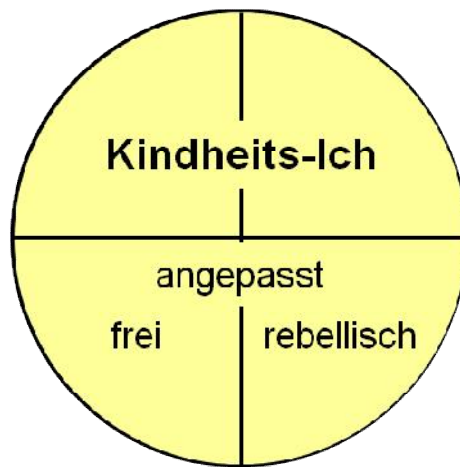

Seite 249, Abb. 62: Drei Aspekte des Kindheits-Ichs

# KAPITEL C: UNTERNEHMENSFÜHRUNG UND ORGANISATION

## 2. UNTERNEHMENSFÜHRUNG

| Transaktionsanalyse: Ich Zustände |               |                                                                                                     |                                                                                                                               |
|-----------------------------------|---------------|-----------------------------------------------------------------------------------------------------|-------------------------------------------------------------------------------------------------------------------------------|
| Ich-Ebene                         |               | Verhalten                                                                                           | Aussagen                                                                                                                      |
| Eltern-Ich                        | Fürsorgliches | tröstet,<br>berechtigt,<br>hilft                                                                    | – Das schaffen wir schon!<br>– Hab keine Angst!<br>– Wenn wir alle zusammen helfen, reicht es.                                |
|                                   | Kritisches    | hebt den Zeigefinger,<br>kritisiert,<br>befiehlt                                                    | – Kommen Sie schon wieder zu spät?<br>– Man hat doch immer seinen Terminplan dabei!                                           |
| Erwachsenen-Ich                   |               | sammelt und gibt<br>Informationen,<br>schätzt Wahrscheinlichkeiten ein<br>und trifft Entscheidungen | – Wie viel Uhr ist es?<br>– Wer könnte den Brief noch haben?<br>– Mit Hilfe der Netzplantechnik werden wir das Problem lösen. |
| Kindheits-Ich                     | Angepasstes   | hilflos, hat Angst<br>passt sich den Normen an,<br>gibt nach                                        | – Ich möchte gern, aber vielleicht bekommen wir Ärger, wenn wir jetzt nicht gehen.<br>– Das darf man nicht!                   |
|                                   | Freies        | spontan,<br>ausgelassen,<br>impulsiv                                                                | – Mensch schau mal!<br>– Ganz prima, wie Sie das gemacht haben!                                                               |
|                                   | Rebellisches  | rebellisch, aggressiv,<br>spitz, listig,<br>egozentrisch                                            | – Wenn Sie alles besser wissen, machen Sie doch Ihren Kram alleine!<br>– Ich habe Ihren verdammten Brief nicht verschluckt!   |

Seite 250, Abb. 63: Typische Verhaltensweisen und Aussagen des Eltern-, Kindheits- und Erwachsenen-Ichs

## KAPITEL C: UNTERNEHMENSFÜHRUNG UND ORGANISATION

### 2. UNTERNEHMENSFÜHRUNG

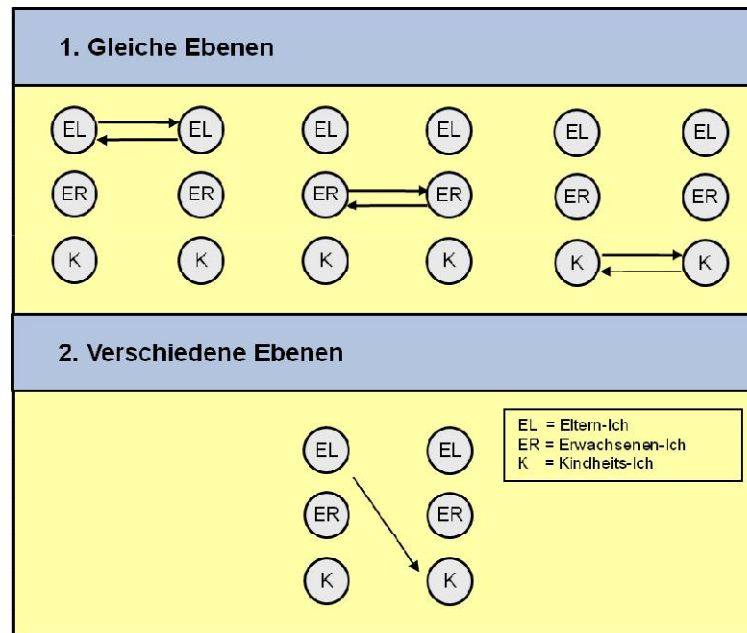

Seite 251, Abb. 64: Parallele Transaktionen

## KAPITEL C: UNTERNEHMENSFÜHRUNG UND ORGANISATION

### 2. UNTERNEHMENSFÜHRUNG

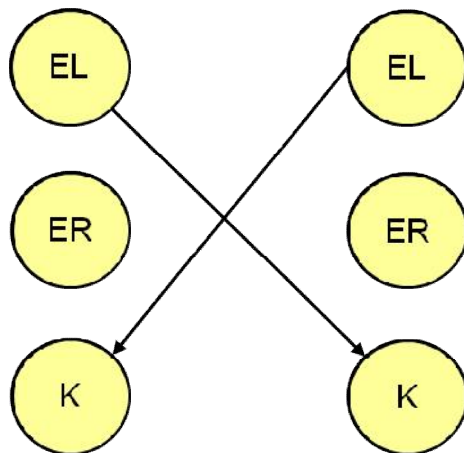

Seite 251, Abb. 65: Gekreuzte Transaktionen

## KAPITEL C: UNTERNEHMENSFÜHRUNG UND ORGANISATION

### 2. UNTERNEHMENSFÜHRUNG

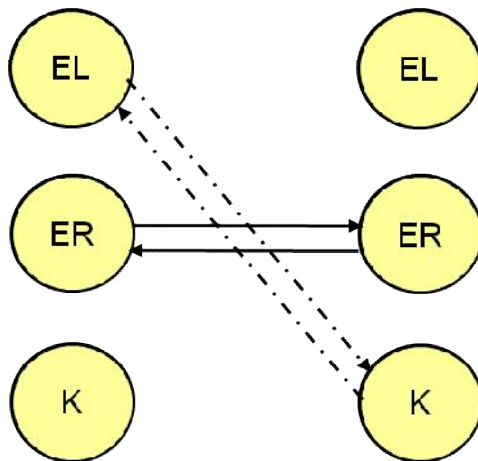

Seite 252, Abb. 66: Verdeckte Transaktionen

# KAPITEL C: UNTERNEHMENSFÜHRUNG UND ORGANISATION

## 2. UNTERNEHMENSFÜHRUNG

| Lebenspositionen   |                                                 |                                               |
|--------------------|-------------------------------------------------|-----------------------------------------------|
| Einstellung        | Ich bin o.k.                                    | Ich bin nicht o.k.                            |
| Du bist o.k.       | konstruktiv umgehen mit dem Problem/dem anderen | sich zurückziehen von dem Problem/dem anderen |
| Du bist nicht o.k. | loswerden das Problem/den anderen               | nichts anfangen, stecken bleiben              |

Seite 253, Abb. 67: Grundeinstellungen in der Transaktionsanalyse

(Vgl. Harris, T. A.: Ich bin o.k. Du bist o.k.: Wie wir uns selbst besser verstehen und unsere Einstellung zu anderen verändern können – Eine Einführung in die Transaktionsanalyse, Reinbek bei Hamburg 1991, S. 40 f)

*Jung: Allgemeine Betriebswirtschaftslehre. De Gruyter Oldenbourg 2016. ISBN 978-3-486-76376-8*

71

## KAPITEL C: UNTERNEHMENSFÜHRUNG UND ORGANISATION

### 2. UNTERNEHMENSFÜHRUNG

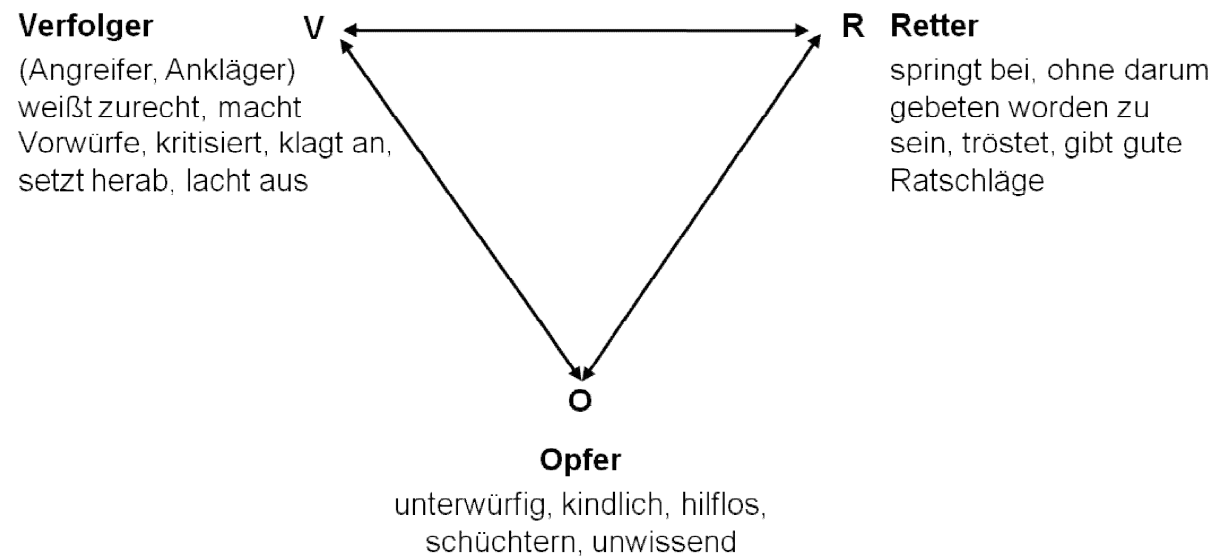

Seite 254, Abb. 68: Manipulative Rollen

(Zu Beispielen und Übungen zur Transaktionsanalyse vgl. ausführlich Jung, H.: Persönlichkeitstypologie, München/Wien 2014, S. 155)

*Jung: Allgemeine Betriebswirtschaftslehre. De Gruyter Oldenbourg 2016. ISBN 978-3-486-76376-8*

72



# KAPITEL C: UNTERNEHMENSFÜHRUNG UND ORGANISATION

## 2. UNTERNEHMENSFÜHRUNG

**Angst vor Selbsthingabe**

(wird als Ich-Verlust und Abhängigkeit empfunden)

**Angst vor Selbstwerdung**

(wird als Einsamkeit und Isolation empfunden)

**Angst vor Wandlung**

(wird als Vergänglichkeit und Unsicherheit empfunden)

**Angst vor Ordnung und Notwendigkeit**

(wird als Endgültigkeit und Unfreiheit empfunden)

Seite 255

(Vgl. hierzu ausführlich Riemann, F.: Grundformen der Angst, 39. Aufl., München 2009, S.17)

## KAPITEL C: UNTERNEHMENSFÜHRUNG UND ORGANISATION

### 2. UNTERNEHMENSFÜHRUNG

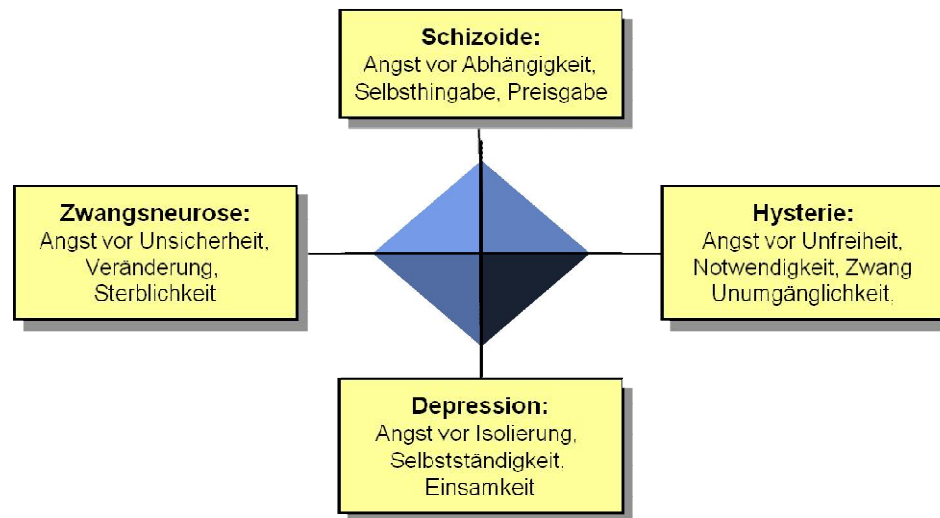

Seite 256, Abb. 69: Neuroseformen und zugehörige Grundformen der Angst

# KAPITEL C: UNTERNEHMENSFÜHRUNG UND ORGANISATION

## 2. UNTERNEHMENSFÜHRUNG

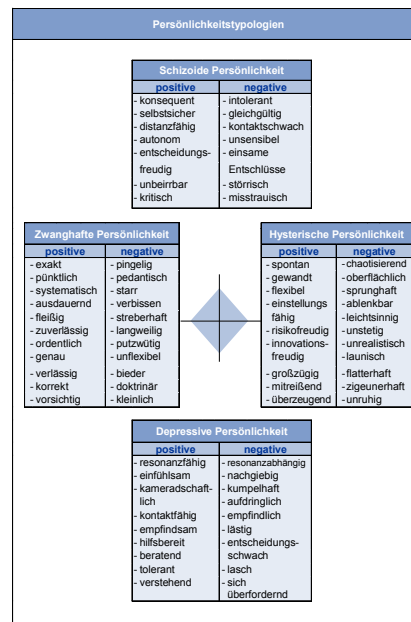

Seite 258, Abb. 70: Eigenschaften der Persönlichkeitstypen  
(Vgl. Jung, H. Persönlichkeitstypologie, Menschenkenntnis als Instrument der Mitarbeiterführung,  
München / Wien 2014, S. 176)

Jung: Allgemeine Betriebswirtschaftslehre. De Gruyter Oldenbourg 2016. ISBN 978-3-486-76376-8

## KAPITEL C: UNTERNEHMENSFÜHRUNG UND ORGANISATION

### 2. UNTERNEHMENSFÜHRUNG

|                           | <b>Schizoide Persönlichkeit<br/>(unabhängig)</b>                                                                                                                                                                                                                                 | <b>Depressive Persönlichkeit<br/>(fürsorglich)</b>                                                                                                                                                                                               |
|---------------------------|----------------------------------------------------------------------------------------------------------------------------------------------------------------------------------------------------------------------------------------------------------------------------------|--------------------------------------------------------------------------------------------------------------------------------------------------------------------------------------------------------------------------------------------------|
| <b>Leistungsfähigkeit</b> | <p>Leistungsminderung durch fehlenden Aufforderungsscharakter der Umwelt</p> <p>Leistungsmangel bei Tätigkeiten mit zwischenmenschlichem Kontakt, wie z.B. Teamarbeit</p> <p>Höchstleistungen werden erbracht, wenn die Persönlichkeitsstruktur noch nicht so ausgeprägt ist</p> | <p>Keine große Leistungsfähigkeit, bedingt durch die fehlende aggressive Auseinandersetzung mit der Ich-Schwäche</p> <p>Ist der Stärkegrad noch nicht so intensiv, dann sind sie leistungsfähig, aber zu angepasst und betont pflichtbewusst</p> |
|                           | <b>Zwanghafte Persönlichkeit<br/>(beherrscht)</b>                                                                                                                                                                                                                                | <b>Hysterische Persönlichkeit<br/>(lebhaft)</b>                                                                                                                                                                                                  |
|                           | <p>Die frühkindliche Überforderung kann zu Arbeitsstörungen führen</p> <p>Leistung nur in eingefahrenen Bahnen</p> <p>Keine schöpferische Leistung, Höchstleistungen bei geringer Intensität möglich</p>                                                                         | <p>Leistungsbereitschaft ist personenabhängig</p> <p>Leistungsstärken liegen im Überzeugen und Begeistern</p> <p>Leistungsschwächen liegen in Verantwortlichkeit, Konsequenz und Ausdauer</p>                                                    |

Seite 259, Abb. 71: Die Leistungsfähigkeit der Persönlichkeitstypen  
 (Zu Anwendungsbeispielen vgl. Jung, H.: Persönlichkeitstypologie, Menschenkenntnis als Instrument der Mitarbeiterführung, München / Wien 2014, S. 85 ff)

Jung: Allgemeine Betriebswirtschaftslehre. De Gruyter Oldenbourg 2016. ISBN 978-3-486-76376-8

## PERSÖNLICHKEITSTEST (UFBL-TEST)

### DER CHARAKTERDIAMANT – EIN INSTRUMENT ZUR SELBSTDIAGNOSE

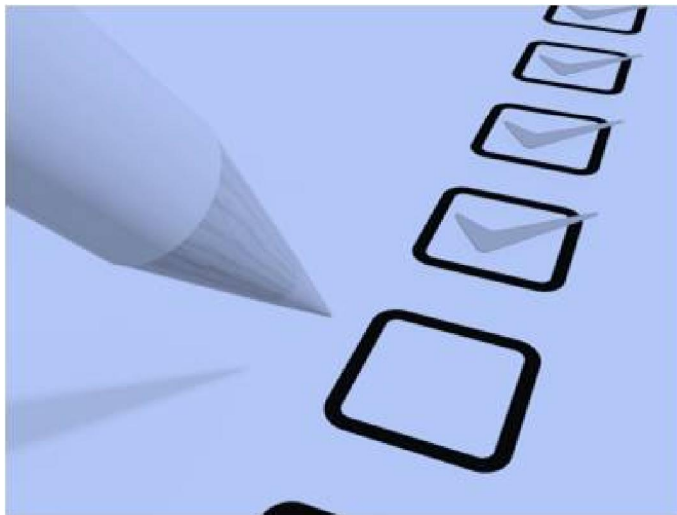

Der Charakterdiamant-Test (UFBL-Test) hilft der Ermittlung und Beurteilung des Charakterbildes und lässt den persönlichen Typ optisch erkennen und besser verstehen.

(Zu Einzelheiten, der Vorgehensweise und Anwendung des Tests vgl. ausführlich Jung, H.: Persönlichkeitstypologie, Menschenkenntnis als Instrument der Mitarbeiterführung, 4. Aufl., München / Wien 2014. S. 167ff)

*Jung: Allgemeine Betriebswirtschaftslehre. De Gruyter Oldenbourg 2016. ISBN 978-3-486-76376-8*

77

## **3. ORGANISATION**

3.1 ZIELE DER ORGANISATION

3.2 BEGRIFF DER ORGANISATION

3.3 REORGANISATION / IMPROVISATION / DISPOSITION

3.4 GRUNDSÄTZE DER ORGANISATION

3.5 ELEMENTE DER ORGANISATION

3.6 AUFBAUORGANISATION

3.7 ABLAUFORGANISATION

## KAPITEL C: UNTERNEHMENSFÜHRUNG UND ORGANISATION

### 3. ORGANISATION

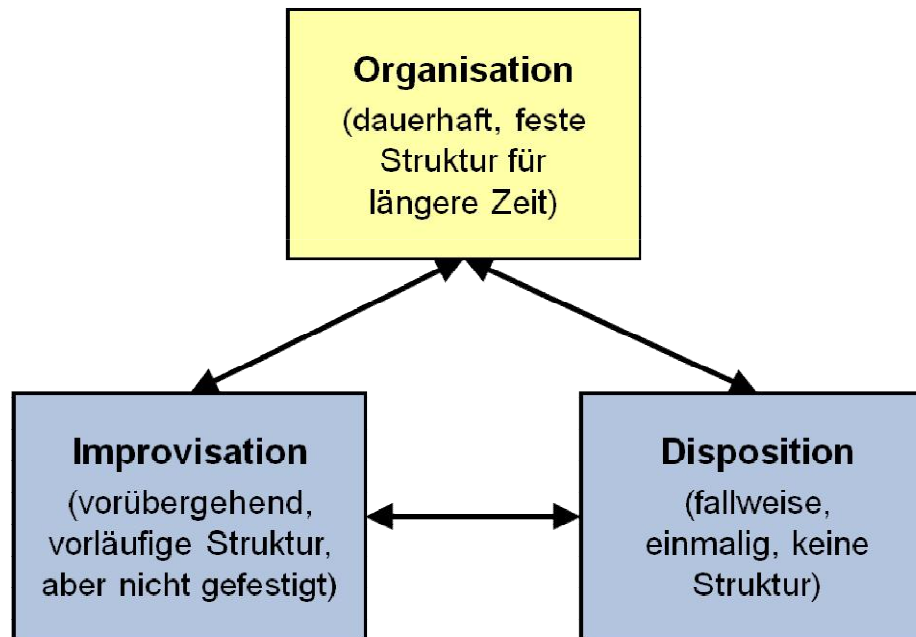

Seite 262, Abb. 72: Zusammenhang Organisation, Improvisation, Disposition

## KAPITEL C: UNTERNEHMENSFÜHRUNG UND ORGANISATION

### 3. ORGANISATION

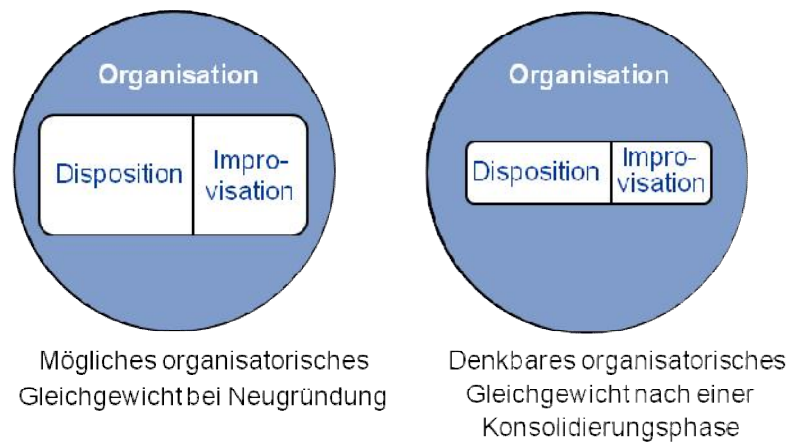

Seite 264, Abb. 73: Verhältnis von Organisation zu Improvisation und Disposition  
(in Anlehnung an Weidner, W.: Organisation in der Unternehmung, 4. Aufl., München 1992)



## KAPITEL C: UNTERNEHMENSFÜHRUNG UND ORGANISATION

### 3. ORGANISATION

| Bestimmungselemente einer Aufgabe |                    |                                                                                     |
|-----------------------------------|--------------------|-------------------------------------------------------------------------------------|
| 1.                                | die Verrichtung    | Durch welche Art von Tätigkeit die Aufgabe gelöst wird<br>[WIE]                     |
| 2.                                | das Objekt         | An welchem Gegenstand die Verrichtung vollzogen werden soll [WORAN] .               |
| 3.                                | der Aufgabenträger | Durch wen die Aufgabe ausgeführt werden soll<br>[WER]                               |
| 4.                                | die Hilfsmittel    | Mit welchen Sach- und Arbeitsmitteln die Aufgabenerledigung erfolgen soll [WOMIT] . |
| 5.                                | der Raum           | An welchem Ort soll die Aufgabenerledigung erfolgen.<br>[WO]                        |
| 6.                                | die Zeit           | Zu welcher Zeit die gestellte Aufgabe erfüllt werden soll<br>[WANN]                 |

Seite 265, Abb. 74: Bestimmungselemente einer Aufgabe

## KAPITEL C: UNTERNEHMENSFÜHRUNG UND ORGANISATION

### 3. ORGANISATION

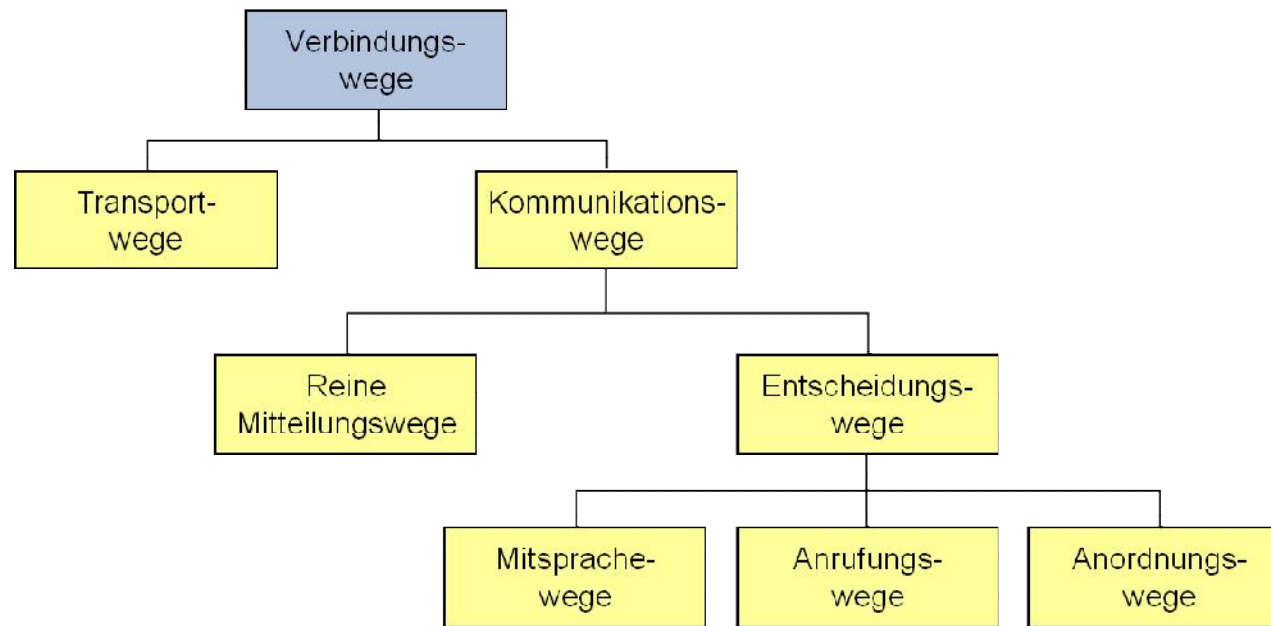

Seite 267, Abb. 75: Verbindungswege zwischen Stellen

## KAPITEL C: UNTERNEHMENSFÜHRUNG UND ORGANISATION

### 3. ORGANISATION

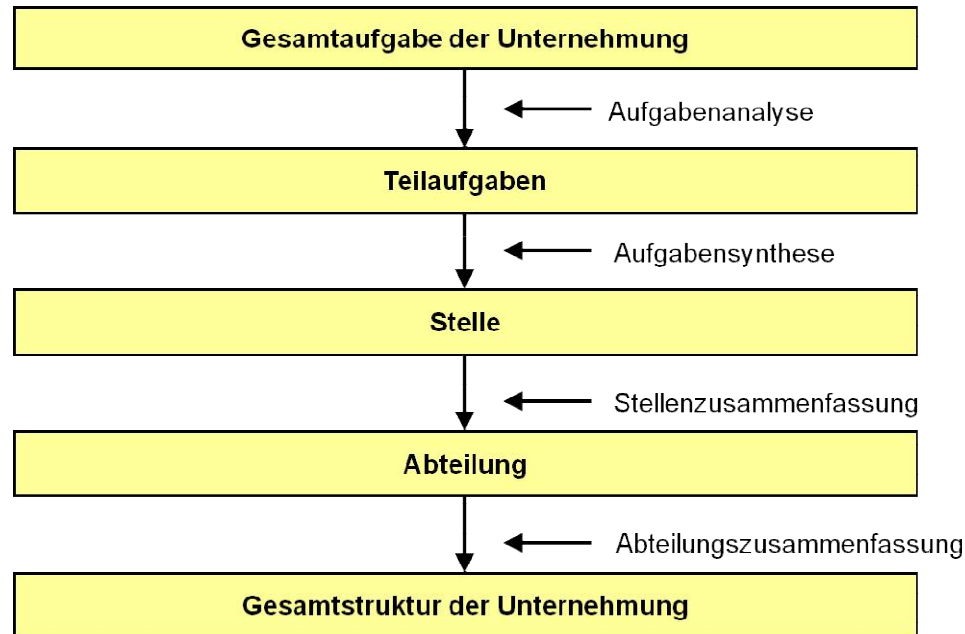

Seite 268, Abb. 76: Vorgehen zur Bildung der Aufbauorganisation

## KAPITEL C: UNTERNEHMENSFÜHRUNG UND ORGANISATION

### 3. ORGANISATION

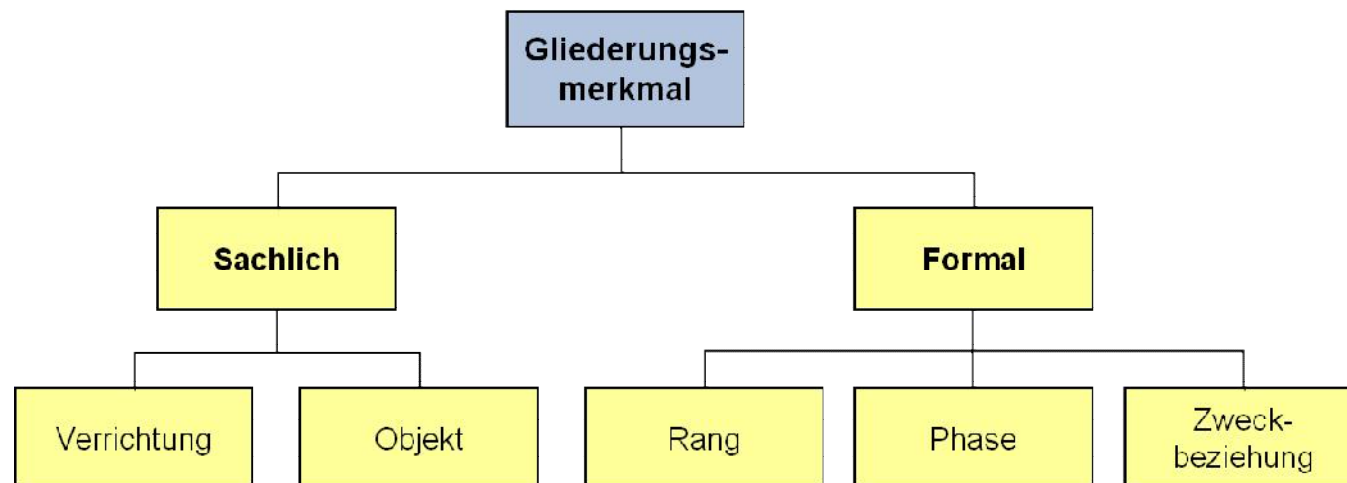

Seite 269, Abb. 77: Gliederungsmerkmale für Teilaufgaben  
( Kosiol, E: Organisation der Unternehmung, 2. Aufl., Wiesbaden 1976)

## KAPITEL C: UNTERNEHMENSFÜHRUNG UND ORGANISATION

### 3. ORGANISATION

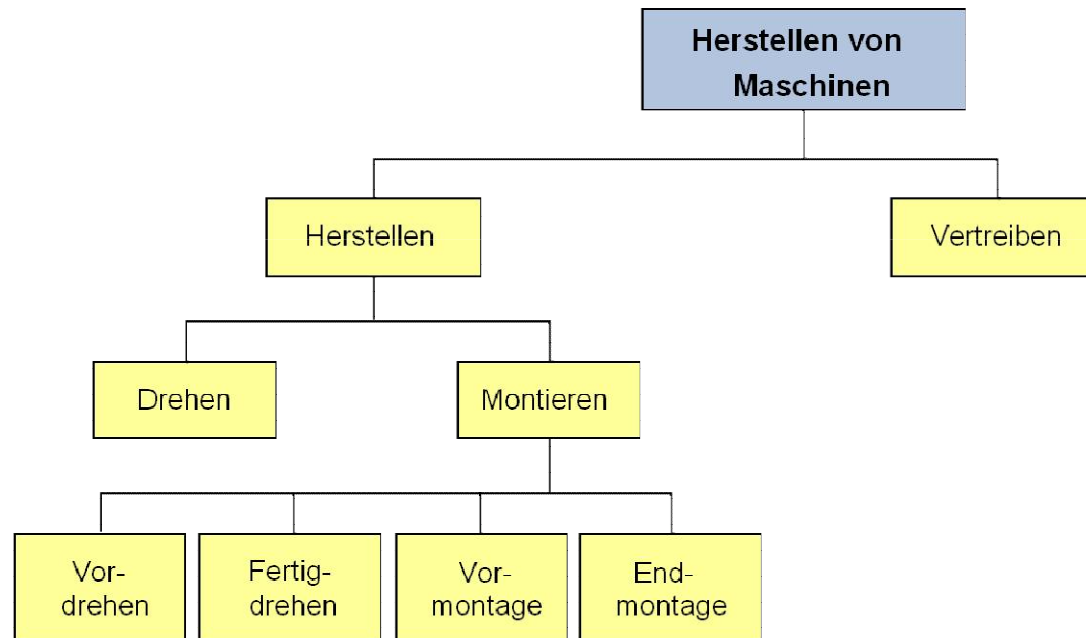

Seite 270, Abb. 78: Beispiel für eine Verrichtungsanalyse

## KAPITEL C: UNTERNEHMENSFÜHRUNG UND ORGANISATION

### 3. ORGANISATION

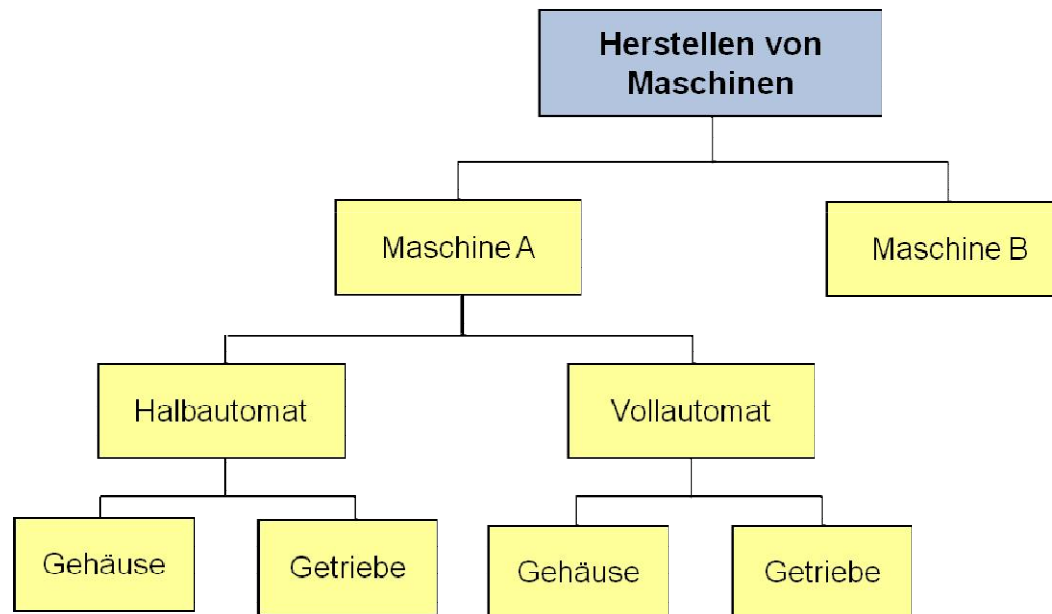

Seite 270, Abb. 79: Beispiel für eine Objektanalyse

## KAPITEL C: UNTERNEHMENSFÜHRUNG UND ORGANISATION

### 3. ORGANISATION

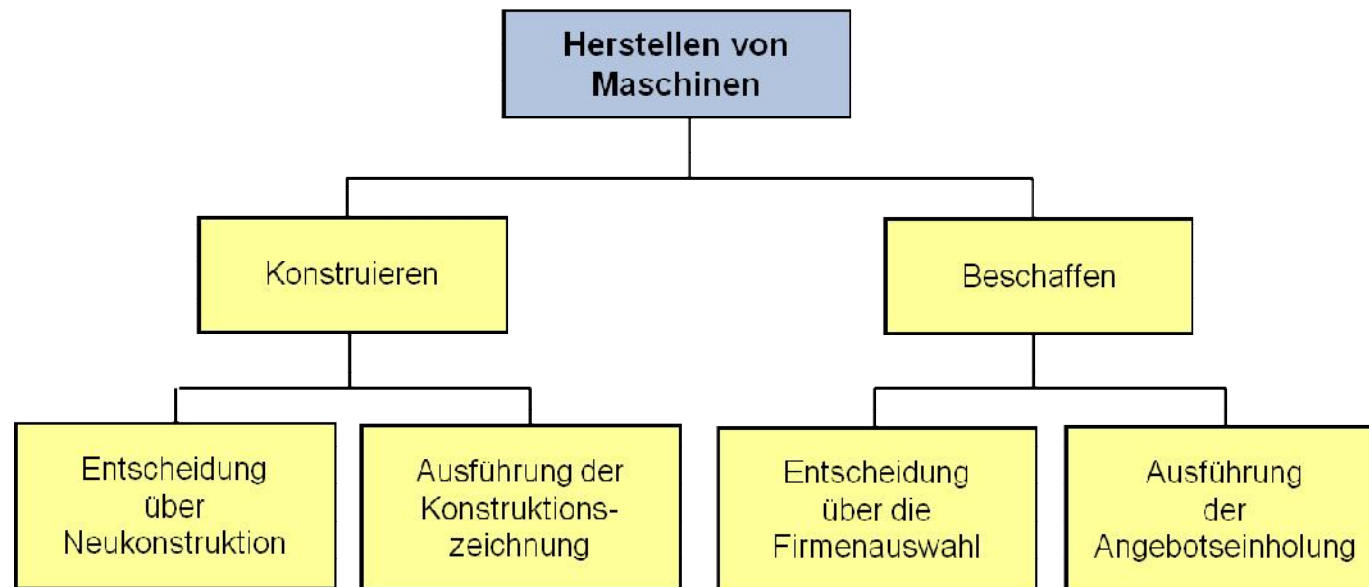

Seite 271, Abb. 80: Beispiel für eine Ranganalyse

## KAPITEL C: UNTERNEHMENSFÜHRUNG UND ORGANISATION

### 3. ORGANISATION

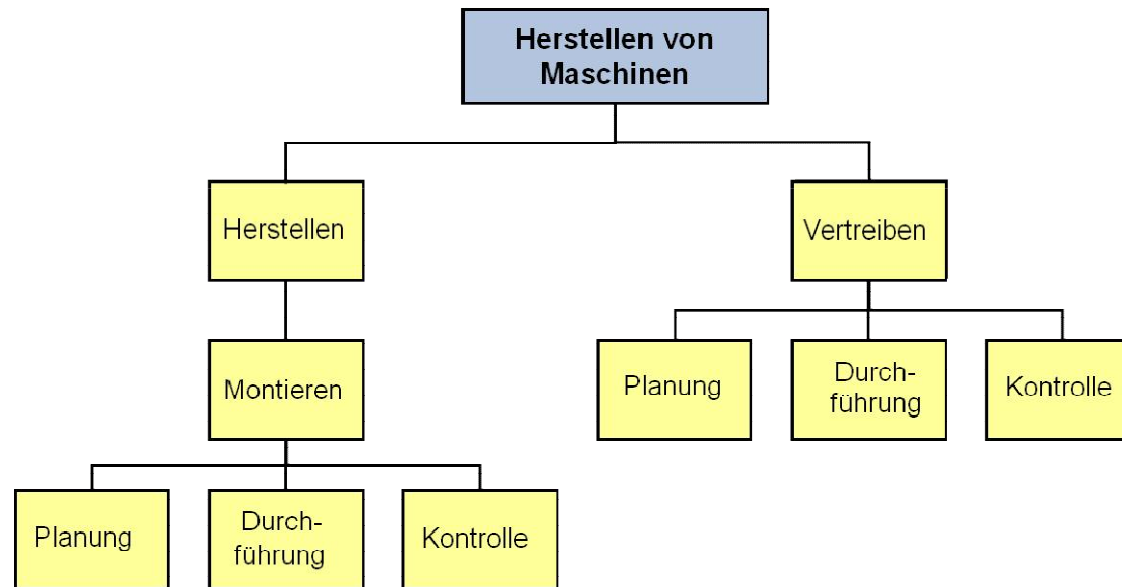

Seite 271, Abb. 81: Beispiel für eine Phasenanalyse



## KAPITEL C: UNTERNEHMENSFÜHRUNG UND ORGANISATION

### 3. ORGANISATION

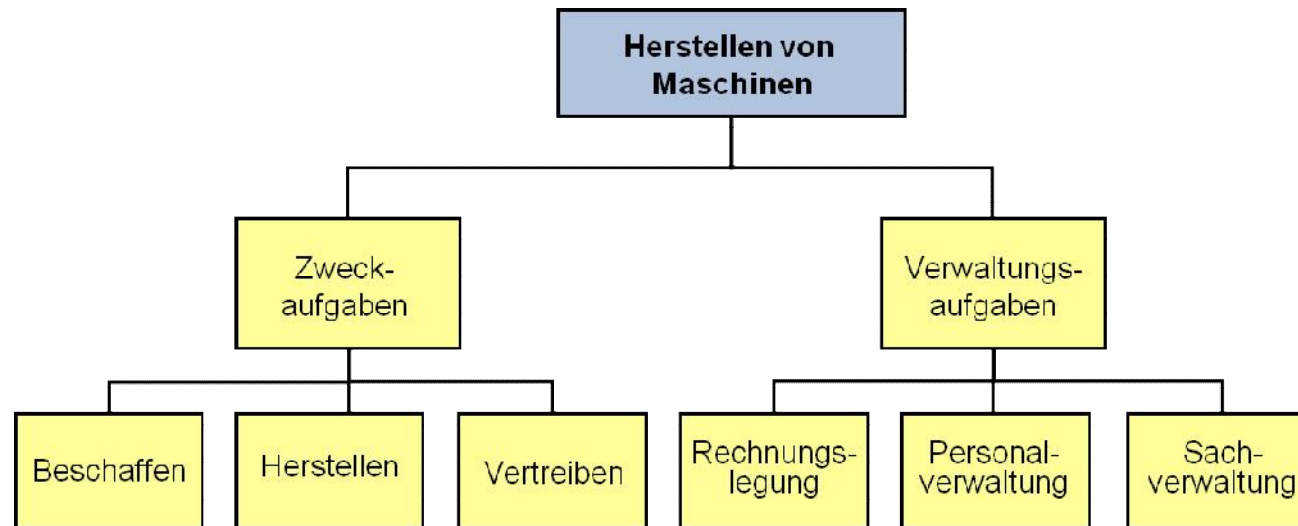

Seite 272, Abb. 82: Beispiel für eine Zweckbeziehungsanalyse

## KAPITEL C: UNTERNEHMENSFÜHRUNG UND ORGANISATION

### 3. ORGANISATION

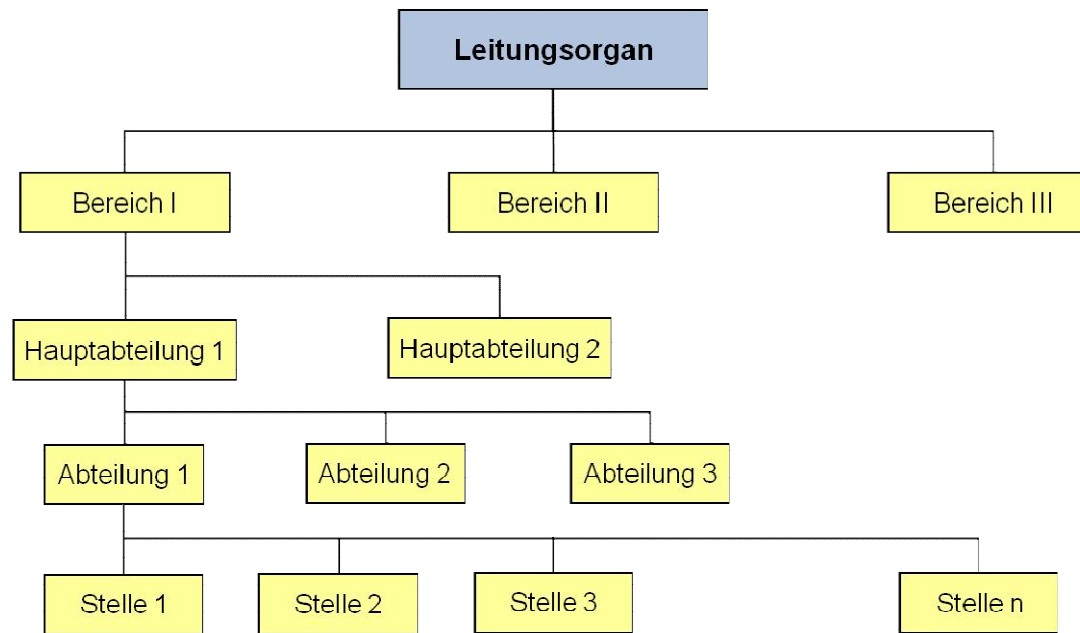

Seite 275, Abb. 83: Hierarchie der Aufbauorganisation

## KAPITEL C: UNTERNEHMENSFÜHRUNG UND ORGANISATION

### 3. ORGANISATION

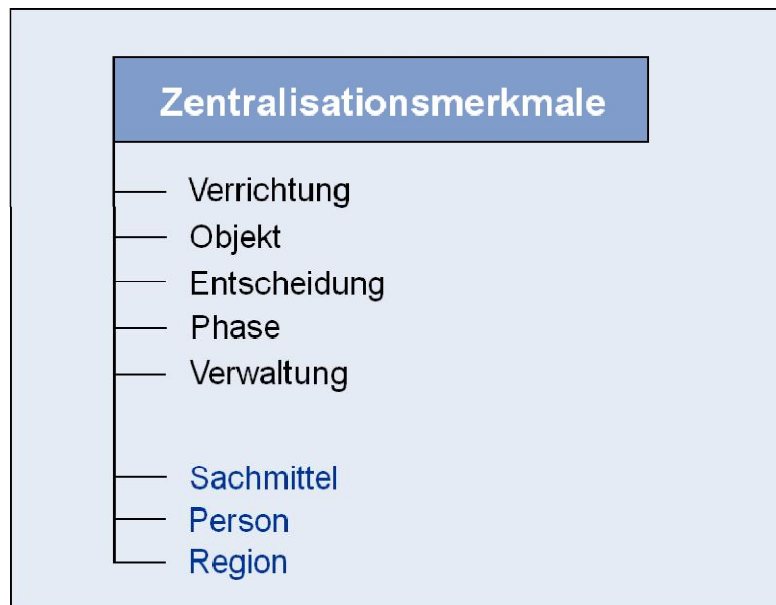

Seite 276, Abb. 84: Zentralisationsmerkmale

## KAPITEL C: UNTERNEHMENSFÜHRUNG UND ORGANISATION

### 3. ORGANISATION

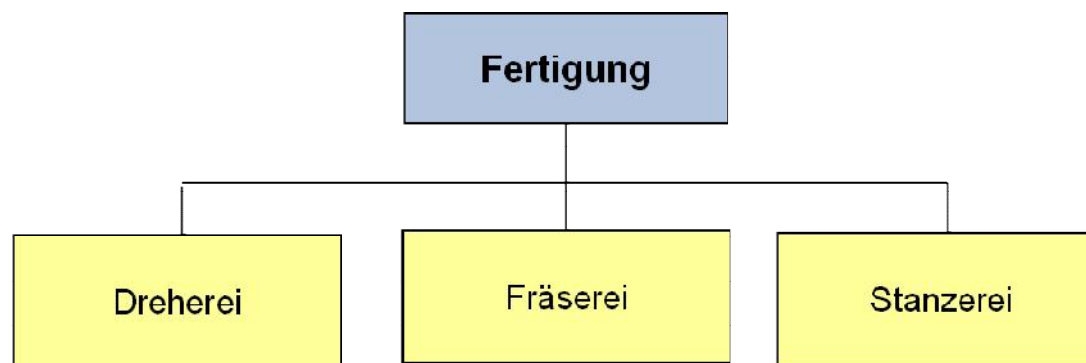

Seite 277, Abb. 85: Beispiel für eine Verrichtungszentralisation

## KAPITEL C: UNTERNEHMENSFÜHRUNG UND ORGANISATION

### 3. ORGANISATION

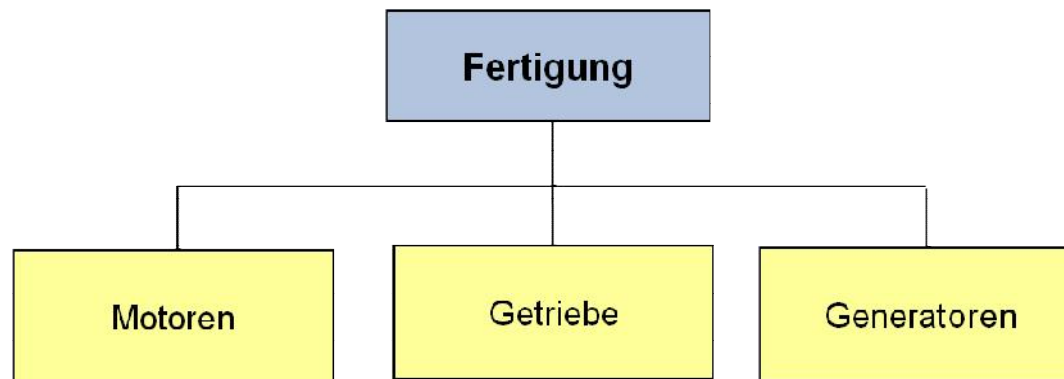

Seite 277, Abb. 86: Beispiel für eine Objektzentralisation

## KAPITEL C: UNTERNEHMENSFÜHRUNG UND ORGANISATION

### 3. ORGANISATION

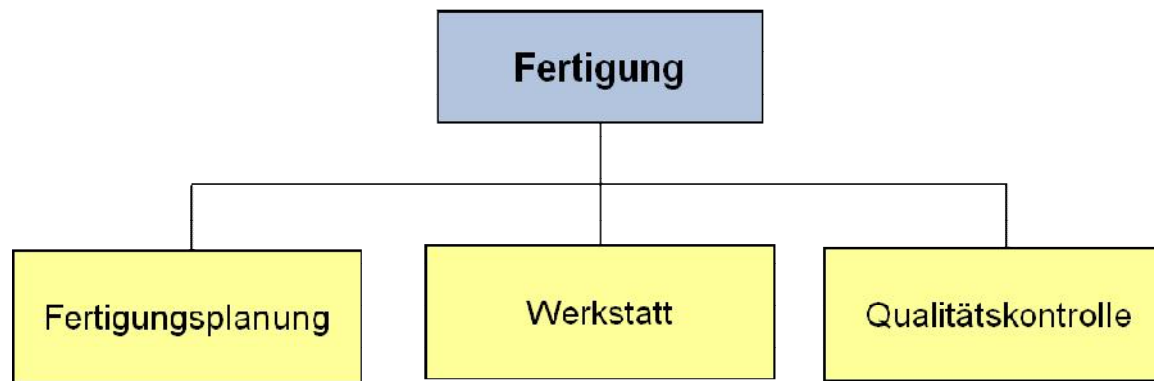

Seite 279, Abb. 87: Beispiel für eine Phasenzentralisation

## KAPITEL C: UNTERNEHMENSFÜHRUNG UND ORGANISATION

### 3. ORGANISATION

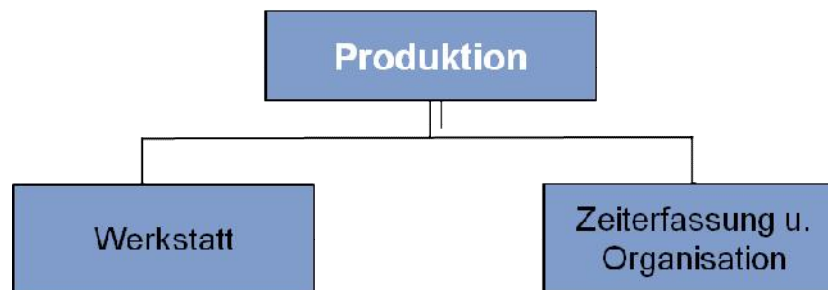

Seite 279, Abb. 88: Beispiel für eine Verwaltungszentralisation

## KAPITEL C: UNTERNEHMENSFÜHRUNG UND ORGANISATION

### 3. ORGANISATION

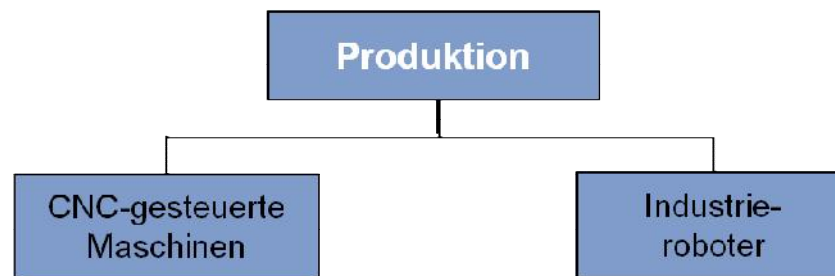

Seite 280, Abb. 89: Beispiel für eine sachmittelorientierte Zentralisation



## KAPITEL C: UNTERNEHMENSFÜHRUNG UND ORGANISATION

### 3. ORGANISATION

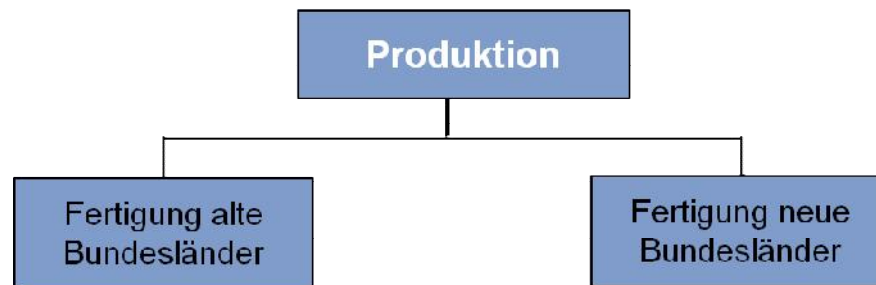

Seite 280, Abb. 90: Beispiel für eine Raumzentralisation

## KAPITEL C: UNTERNEHMENSFÜHRUNG UND ORGANISATION

### 3. ORGANISATION

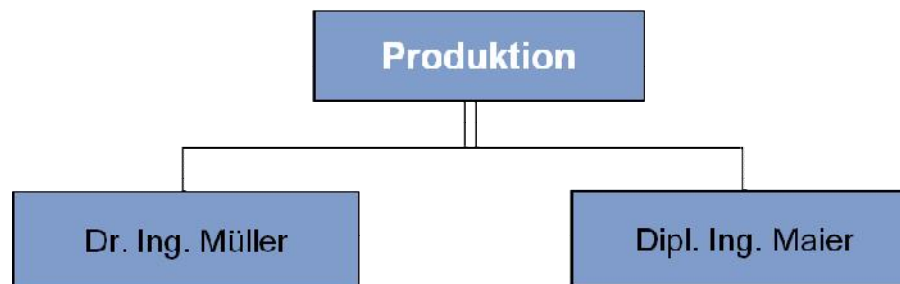

Seite 280, Abb. 91: Beispiel für eine personale Zentralisation

## KAPITEL C: UNTERNEHMENSFÜHRUNG UND ORGANISATION

### 3. ORGANISATION

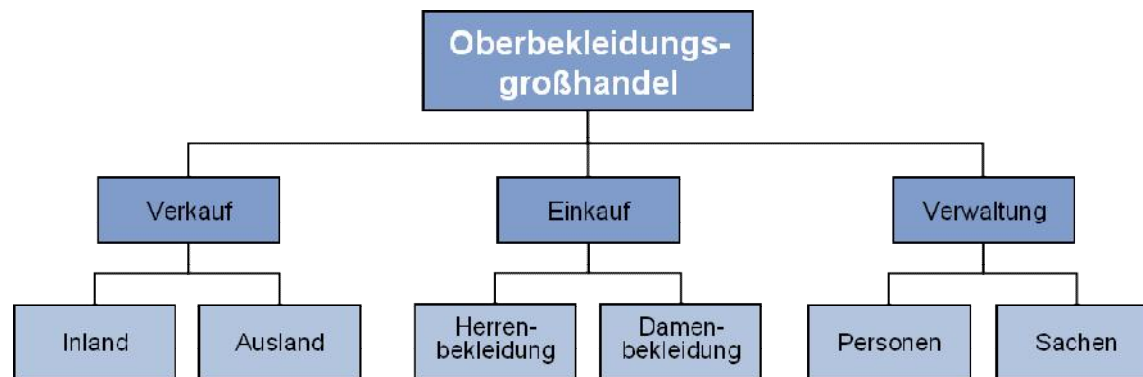

Seite 281, Abb. 92: Beispiel für eine Dezentralisation-Zentralisation

## KAPITEL C: UNTERNEHMENSFÜHRUNG UND ORGANISATION

### 3. ORGANISATION

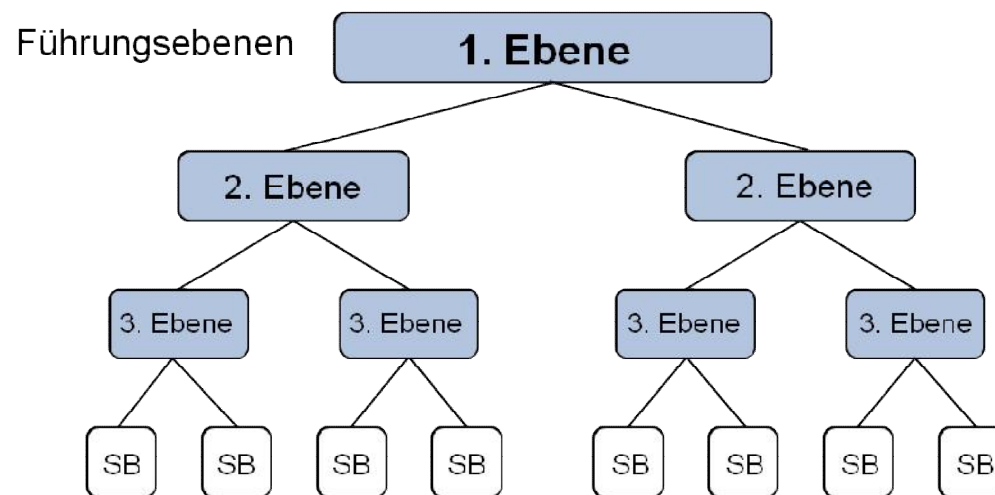

Seite 282, Abb. 93: Einliniensystem

## KAPITEL C: UNTERNEHMENSFÜHRUNG UND ORGANISATION

### 3. ORGANISATION

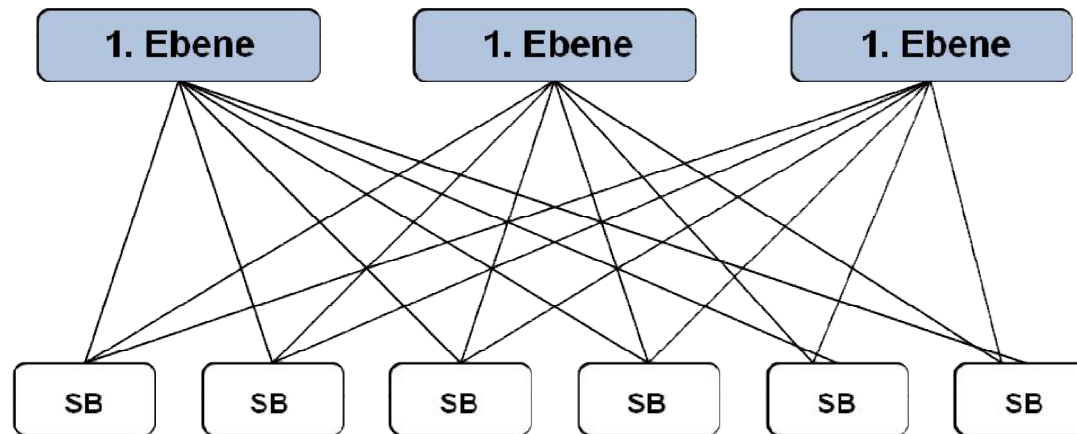

Seite 283, Abb. 94: Mehrliniensystem

## KAPITEL C: UNTERNEHMENSFÜHRUNG UND ORGANISATION

### 3. ORGANISATION

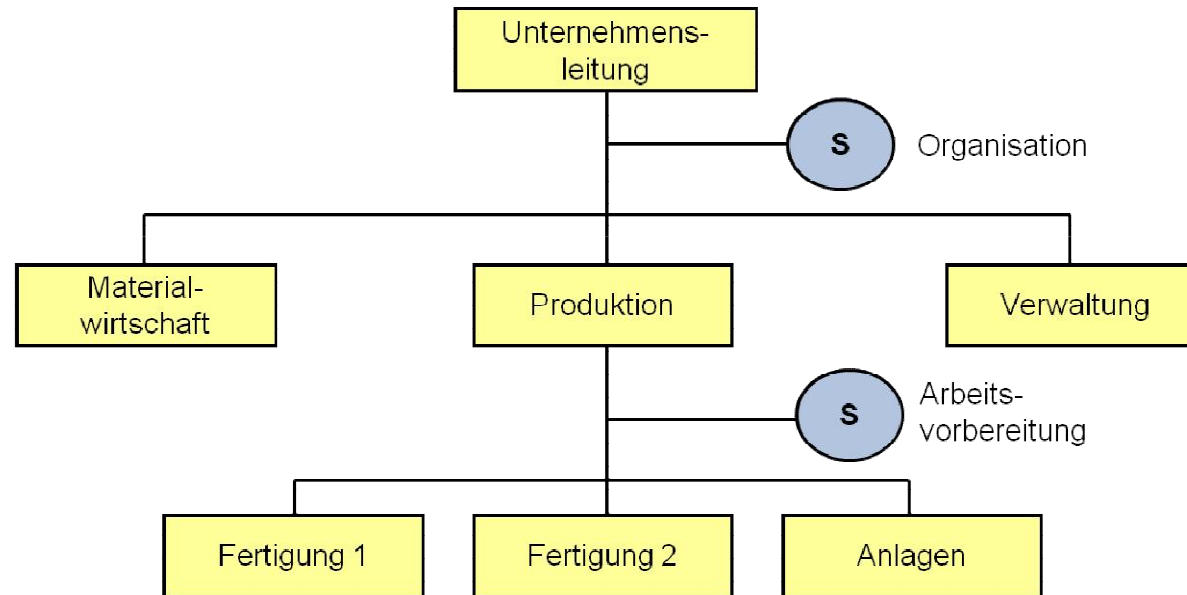

S = Stabstelle

Seite 284, Abb. 95: Beispiel für ein Stabliniensystem

## KAPITEL C: UNTERNEHMENSFÜHRUNG UND ORGANISATION

### 3. ORGANISATION

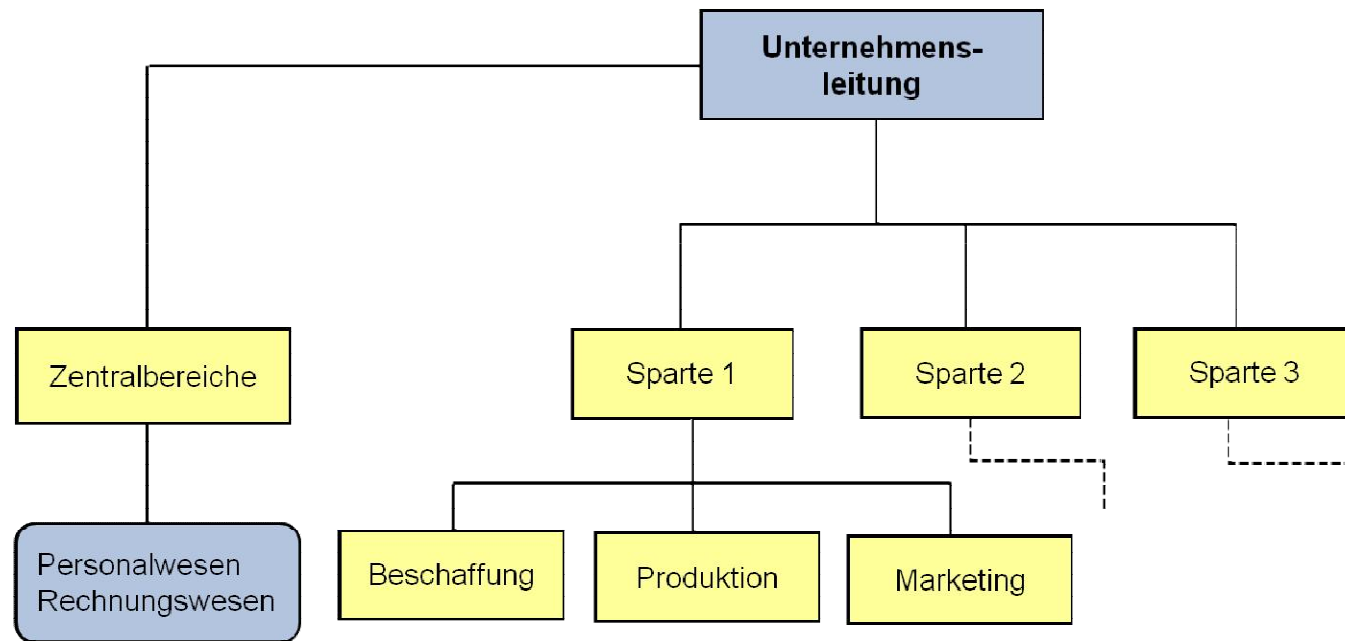

Seite 285, Abb. 96: Beispiel für eine Spartenorganisation

## KAPITEL C: UNTERNEHMENSFÜHRUNG UND ORGANISATION

### 3. ORGANISATION

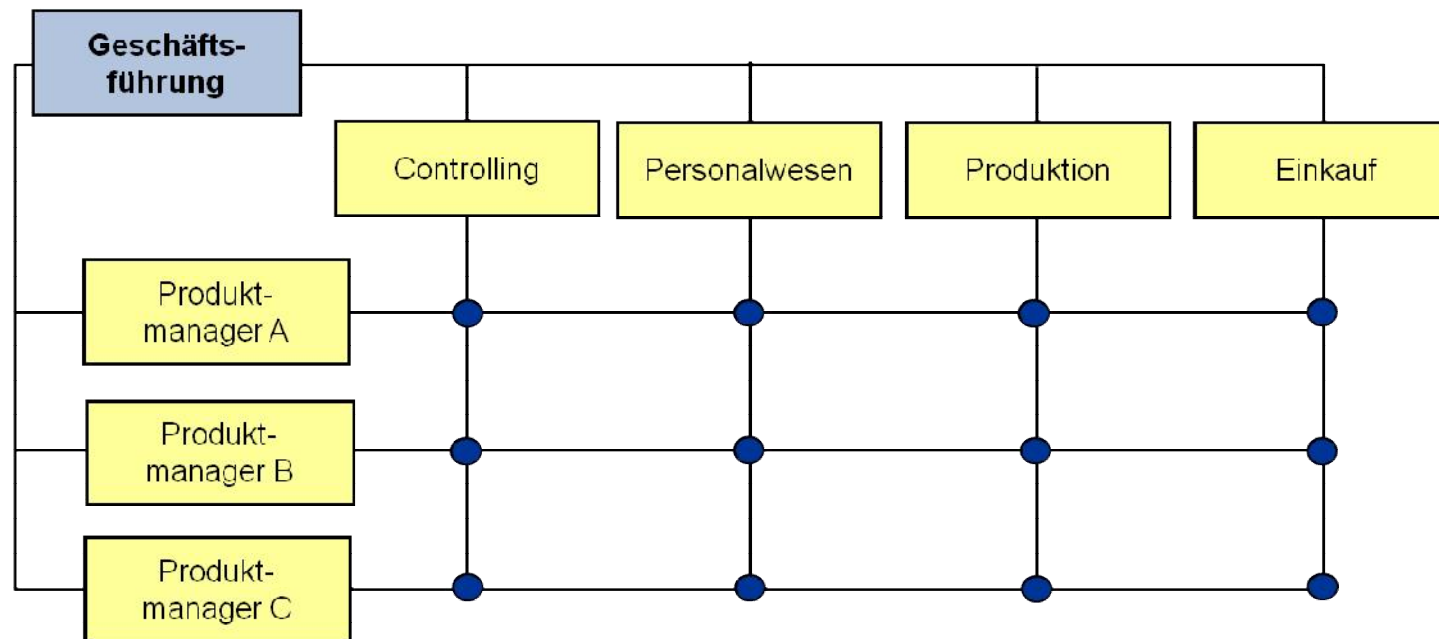

Seite 287, Abb. 97: Beispiel für eine Matrixorganisation



## KAPITEL C: UNTERNEHMENSFÜHRUNG UND ORGANISATION

### 3. ORGANISATION

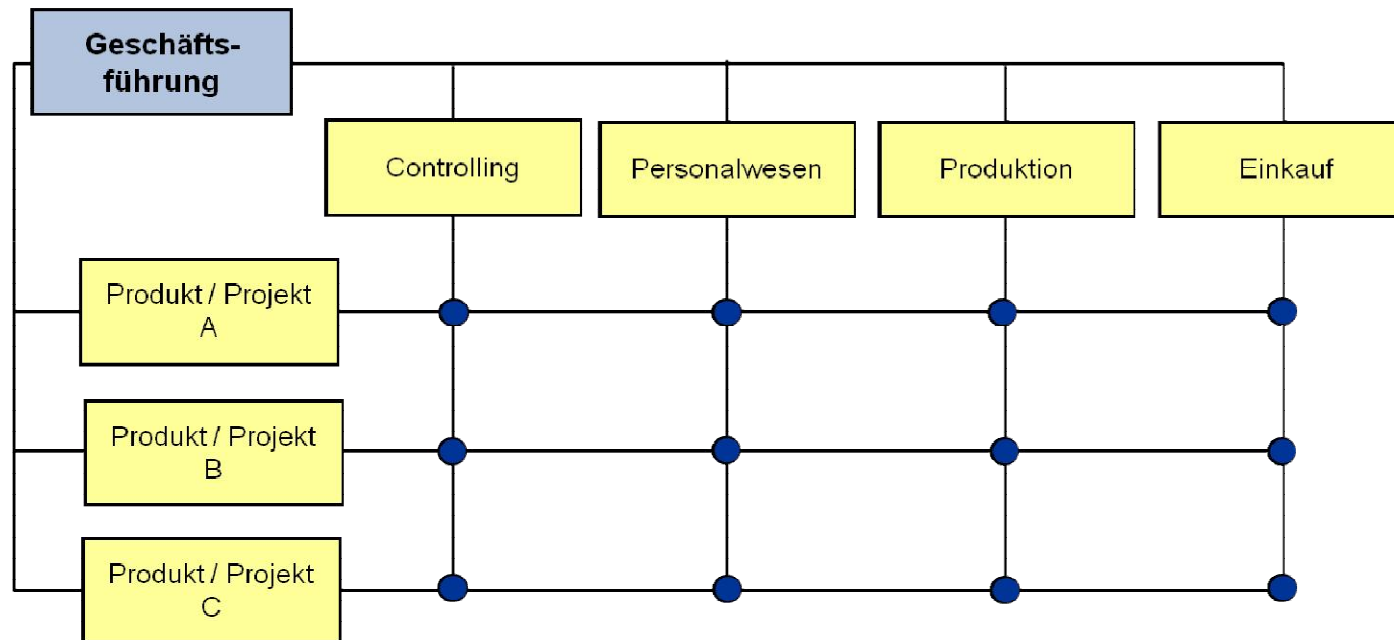

Seite 289, Abb. 98: Produkt-/Projektmanagement

## KAPITEL C: UNTERNEHMENSFÜHRUNG UND ORGANISATION

### 3. ORGANISATION

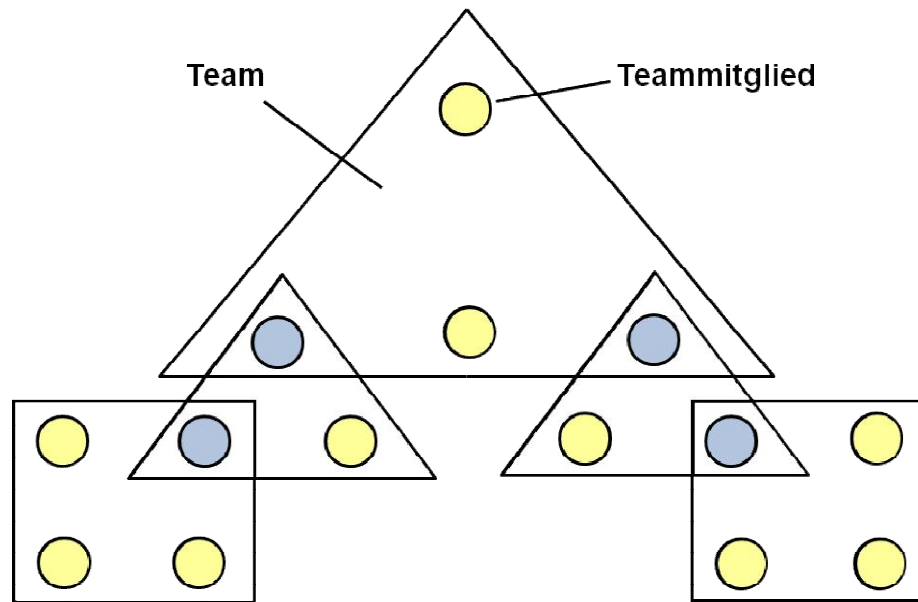

Seite 290, Abb. 99: Teamorganisation  
(in Anlehnung an Schulte-Zurhausen, M.: Organisation, 2. Aufl., München 1999, S. 291)

## KAPITEL C: UNTERNEHMENSFÜHRUNG UND ORGANISATION

### 3. ORGANISATION

| Vorteile:                                                                                                                                                                                                                                                                                                                                                                                                         | Nachteile:                                                                                                                                                                                                                                                                   |
|-------------------------------------------------------------------------------------------------------------------------------------------------------------------------------------------------------------------------------------------------------------------------------------------------------------------------------------------------------------------------------------------------------------------|------------------------------------------------------------------------------------------------------------------------------------------------------------------------------------------------------------------------------------------------------------------------------|
| <ul style="list-style-type: none"> <li>– Verkürzung der Kommunikationswege,</li> <li>– Nutzung der Information, des Wissens und der Kreativität aller Mitarbeiter,</li> <li>– Synergievorteil,</li> <li>– Erhöhung der Flexibilität der Organisation,</li> <li>– Selbstentfaltungsmöglichkeit der Mitarbeiter,</li> <li>– Motivation,</li> <li>– Koordinationsvorteil,</li> <li>– Gutes Betriebsklima.</li> </ul> | <ul style="list-style-type: none"> <li>– Zeitaufwand, Kosten,</li> <li>– Gefahr von Kompromissen,</li> <li>– Lange Diskussionen,</li> <li>– Frustration von Minderheiten, deren Vorschläge nicht berücksichtigt wurden,</li> <li>– Dominanz einzelner Mitglieder.</li> </ul> |

Seite 291, Abb. 100: Vor- und Nachteile von Teamorganisationen

## KAPITEL C: UNTERNEHMENSFÜHRUNG UND ORGANISATION

### 3. ORGANISATION

|                               |                  | Stablinien-<br>organisation | Sparten-<br>organisation | Matrix-<br>organisation | Team-<br>organisation |
|-------------------------------|------------------|-----------------------------|--------------------------|-------------------------|-----------------------|
| Stellen-<br>bildung           | Objekt           | X                           | X                        | X                       | X                     |
|                               | Verrichtung      | X                           |                          | X                       | X                     |
|                               | Region           |                             | X                        | X                       | X                     |
| Leitungs-<br>prinzip          | Einliniensystem  | X                           | X                        |                         | X                     |
|                               | Mehrliniensystem |                             |                          | X                       | X                     |
| Entscheidungs-<br>kompetenzen | Zentralisation   | X                           |                          |                         |                       |
|                               | Dezentralisation |                             | X                        | X                       | X                     |

Seite 291, Abb. 101: Gegenüberstellung der Organisationsformen  
(Vgl. Thommen, J.-P.: Managementorientierte Betriebswirtschaftslehre, 6. Aufl., Zürich 2000, S. 662)

## KAPITEL C: UNTERNEHMENSFÜHRUNG UND ORGANISATION

### 3. ORGANISATION

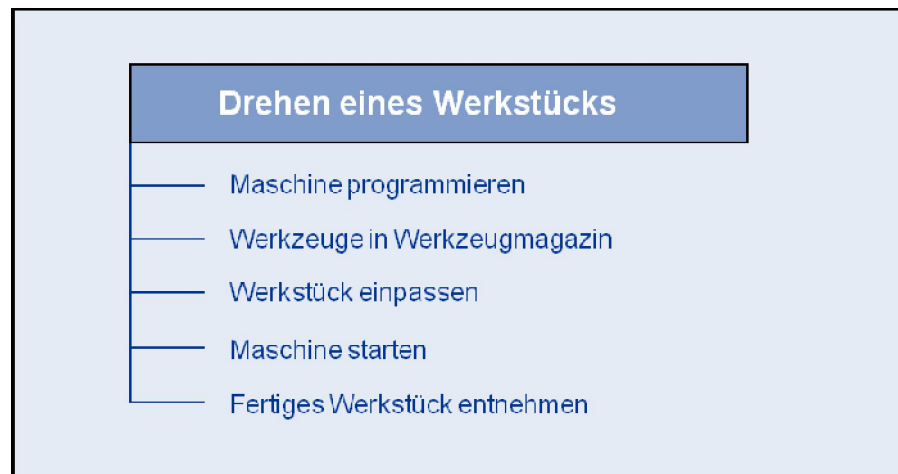

Seite 293, Abb. 102: Beispiel für eine Arbeitsanalyse

## 4. TRENDS IN DER UNTERNEHMENSFÜHRUNG UND ORGANISATION

4.1 LEAN MANAGEMENT

4.2 CHAOS-MANAGEMENT

4.3 VISIONÄRES MANAGEMENT

4.4 QUALITÄTS-MANAGEMENT

4.5 INNOVATIVES MANAGEMENT

4.6 UMWELTORIENTIERTES MANAGEMENT

4.7 INTERNATIONALE UNTERNEHMENSFÜHRUNG

4.8 NEUERE ORGANISATIONSFORMEN

4.9 ZUKÜNFTIGE AUFGABENFELDER DER UNTERNEHMENSLEITUNG

*Jung: Allgemeine Betriebswirtschaftslehre. De Gruyter Oldenbourg 2016. ISBN 978-3-486-76376-8*

## KAPITEL C: UNTERNEHMENSFÜHRUNG UND ORGANISATION

### 4. TRENDS IN DER UNTERNEHMENSFÜHRUNG UND ORGANISATION

| Lean Management verlangt eine neue Denkweise                                                                        |                                                                                                                                             |
|---------------------------------------------------------------------------------------------------------------------|---------------------------------------------------------------------------------------------------------------------------------------------|
| bisherige Denkweise                                                                                                 | neue Denkweise                                                                                                                              |
| Planungen und Leistungsvorgaben kommen von oben                                                                     | Planungen und Vorgaben werden mit Mitarbeitern vor Ort gemeinsam entwickelt                                                                 |
| Verbesserungen, Kostenreduzierungen sind nur mit Kapitalinvestitionen in Mechanisierung und Automatisierung möglich | Verbesserungen sind am kostengünstigsten durch Leistungen der Mitarbeiter (Mitarbeiterproduktivität) zu erreichen                           |
| Fortschritt ist nur durch Suche nach komplexen Gesamtlösungen zu erreichen                                          | Fortschritt wird erzielt durch Suche und Realisierung einer Vielzahl von einfachen Lösungen                                                 |
| Auch fehlerhafte Vormaterialien und Komponenten müssen aus Termingründen verarbeitet werden                         | Fehlerhafte Vormaterialien und Komponenten nicht annehmen, nicht bearbeiten, nicht weitergeben                                              |
| Vom Schreibtisch aus Abläufe planen und organisieren                                                                | Vom Ort des Geschehens aus Abläufe planen und organisieren                                                                                  |
| Fehlerwiederholungen und Reibungsverluste als unabänderlich ansehen                                                 | Fehler sofort beseitigen und auch an der Quelle abstellen. Checklisten gegen Fehlerwiederholungen, Reibungsverluste erkennen und beseitigen |
| Mangelndes Kostenbewusstsein (Vergeudung, Verschwendung) akzeptieren                                                | Alle Vergeudungen und Verschwendungen (unnötige Kostenverursacher) beseitigen                                                               |

Seite 298, Abb. 103: Vergleich alte/neue Denkweise

## KAPITEL C: UNTERNEHMENSFÜHRUNG UND ORGANISATION

### 4. TRENDS IN DER UNTERNEHMENSFÜHRUNG UND ORGANISATION

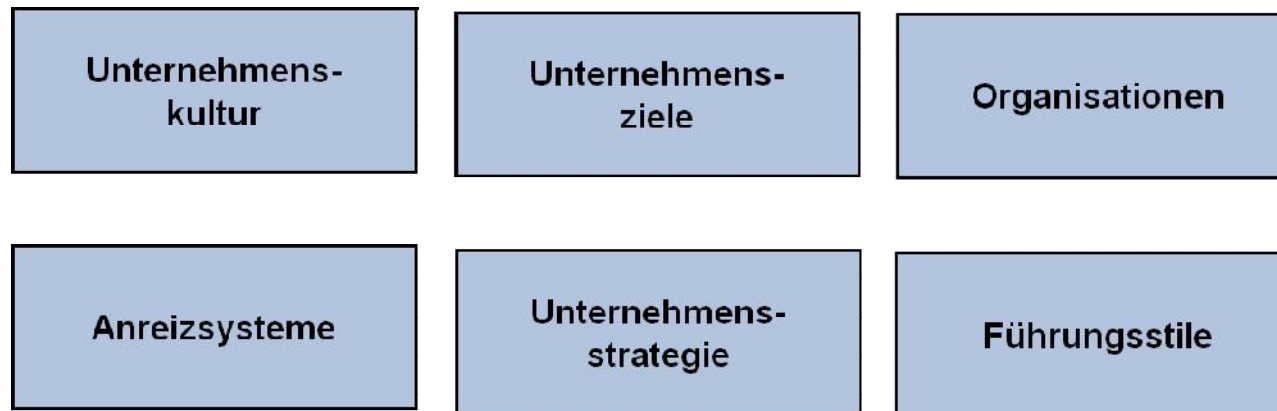

Seite 304, Abb. 104: Elemente für eine Ausrichtung auf Innovationen



## KAPITEL C: UNTERNEHMENSFÜHRUNG UND ORGANISATION

### 4. TRENDS IN DER UNTERNEHMENSFÜHRUNG UND ORGANISATION

|                                | Vorteile                                                                                                                                                                                                                                                                                   | Nachteile                                                                                                                                                                                                                                              |
|--------------------------------|--------------------------------------------------------------------------------------------------------------------------------------------------------------------------------------------------------------------------------------------------------------------------------------------|--------------------------------------------------------------------------------------------------------------------------------------------------------------------------------------------------------------------------------------------------------|
| <b>Ethnozentrischer Ansatz</b> | <ul style="list-style-type: none"> <li>- Einheitliche Unternehmenspolitik</li> <li>- Bessere Kommunikation zwischen den Häusern</li> <li>- Effektivere Kontrolle</li> <li>- Internationale, weltweit einsetzbare Führungsgruppe</li> </ul>                                                 | <ul style="list-style-type: none"> <li>- Hohe Transferkosten für entsandte Führungskräfte</li> <li>- Mangelnde Berücksichtigung lokaler Personalbedürfnisse</li> <li>- Beschränkte Aufstiegsmöglichkeiten für Mitarbeiter des Gastlandes</li> </ul>    |
| <b>Polyzentrischer Ansatz</b>  | <ul style="list-style-type: none"> <li>- Keine Kosten für Entsendungen</li> <li>- Kein Widerstand gegenüber fremden Vorgesetzten</li> <li>- Keine Sprachbarrieren</li> </ul>                                                                                                               | <ul style="list-style-type: none"> <li>- Uneinheitliche Unternehmenspolitik</li> <li>- Wertekonflikte</li> <li>- Aufwendige Personalentwicklung zur Vermittlung notwendiger Fähigkeiten</li> </ul>                                                     |
| <b>Geozentrischer Ansatz</b>   | <ul style="list-style-type: none"> <li>- Optimaler Einsatz des vorhandenen Humankapitals</li> <li>- Hohe Motivation und Identifikation mit dem Stammhaus</li> <li>- Aufbau einer internationalen Führungsmannschaft</li> <li>- Förderung einer einheitlichen Unternehmenskultur</li> </ul> | <ul style="list-style-type: none"> <li>- Hohe Kosten wegen des grenzüberschreitenden Personaleinsatzes</li> <li>- Akzeptanzprobleme in den Gesellschaften</li> <li>- Probleme bei der kulturellen Einbindung internationaler Führungskräfte</li> </ul> |

Seite 307, Abb. 105: Vor- und Nachteile des EPG-Schemas

## KAPITEL C: UNTERNEHMENSFÜHRUNG UND ORGANISATION

### 4. TRENDS IN DER UNTERNEHMENSFÜHRUNG UND ORGANISATION

|                               | Erläuterung                                                                                                                                      | Ziel                                                                                                                                                                             | Erfolgsvoraussetzung                                                                                                                                                                                                            |
|-------------------------------|--------------------------------------------------------------------------------------------------------------------------------------------------|----------------------------------------------------------------------------------------------------------------------------------------------------------------------------------|---------------------------------------------------------------------------------------------------------------------------------------------------------------------------------------------------------------------------------|
| <b>Prozess-Organisation</b>   | Gestaltungskonzept mit Teamstrukturen zur Verwirklichung einer ganzheitlichen Prozessorientierung                                                | Bessere Koordination und Beschleunigung der Geschäftsprozesse<br>Umgehung der klassischen Schnittstellenprobleme<br>Vermeidung von Mehrfachkontrollen innerhalb der Prozesskette | Prozessverantwortlicher auf höherer Leitungsebene zur Steuerung und Überwachung des Leistungsprozesses<br>Für funktionsübergreifende Teilprozesse sind Projektteams aus Mitgliedern der betroffenen Funktionsbereiche zu bilden |
| <b>Modulare Organisation</b>  | Räumliche und zeitliche Entkopplung arbeitsteiliger Prozesse (unternehmensintern)                                                                | Komplexität der Leistungserstellung reduzieren<br>Kundennähe des Unternehmens erhöhen                                                                                            | Aktualität und Verfügbarkeit aller relevanten Daten<br>Einsatz moderner Informations- und Kommunikationstechnologie                                                                                                             |
| <b>Virtuelle Organisation</b> | Räumliche und zeitliche Entkopplung arbeitsteiliger Prozesse (unternehmensübergreifend) durch die Bildung eines virtuellen Unternehmensnetzwerks | Zeitlich und räumlich flexible Kooperation mehrerer Unternehmen<br>Ausnutzung der jeweiligen Kernkompetenzen                                                                     | Hohe Flexibilität<br>Fehlen starrer, institutionalisierender Strukturen<br>Einsatz moderner Informations- und Kommunikationstechnologie                                                                                         |

Seite 308, Abb. 106: Neuere Organisationsformen im Überblick
