# Supplementary material
Source: publisher site journal article supplement (https://www.degruyterbrill.com/publication/isbn/9783486989434/downloadAsset/9783486989434_Folien--de.zip)
Supplement: Supplementary file 4 [file Teil_D_ABWL.pdf › Teil_D_ABWL.pdf]

# ZUSATZMATERIALIEN

## ALLGEMEINE BETRIEBSWIRTSCHAFTSLEHRE

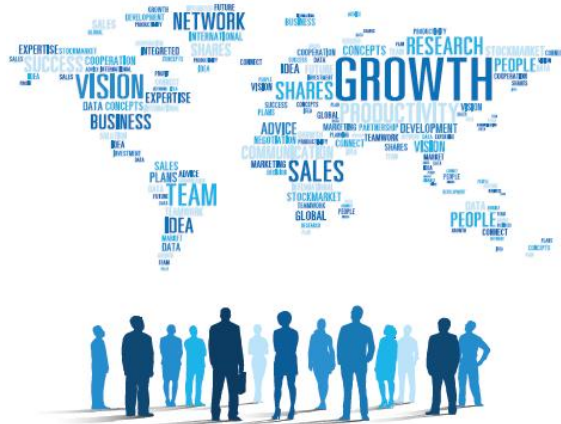

## KAPITEL D: MATERIALWIRTSCHAFT

1. GRUNDLAGEN DER MATERIALWIRTSCHAFT
2. DAS BESCHAFFUNGSPOLITISCHE INSTRUMENTARIUM
3. BESCHAFFUNGSPOLITIK
4. MATERIALDISPOSITION
5. LOGISTISCHE FRAGEN
6. AUSBLICK AUF ZUKÜNFTIGE ENTWICKLUNG DER MATERIALWIRTSCHAFT

# **1. GRUNDLAGEN DER MATERIALWIRTSCHAFT**

1.1 BEGRIFFSBESTIMMUNG UND BEDEUTUNG DER MATERIALWIRTSCHAFT

1.2 AUFGABEN UND ZIELE DER MATERIALWIRTSCHAFT

1.3 STELLUNG DER MATERIALWIRTSCHAFT IM GESAMTUNTERNEHMEN

## KAPITEL D: MATERIALWIRTSCHAFT

### 1. GRUNDLAGEN DER MATERIALWIRTSCHAFT

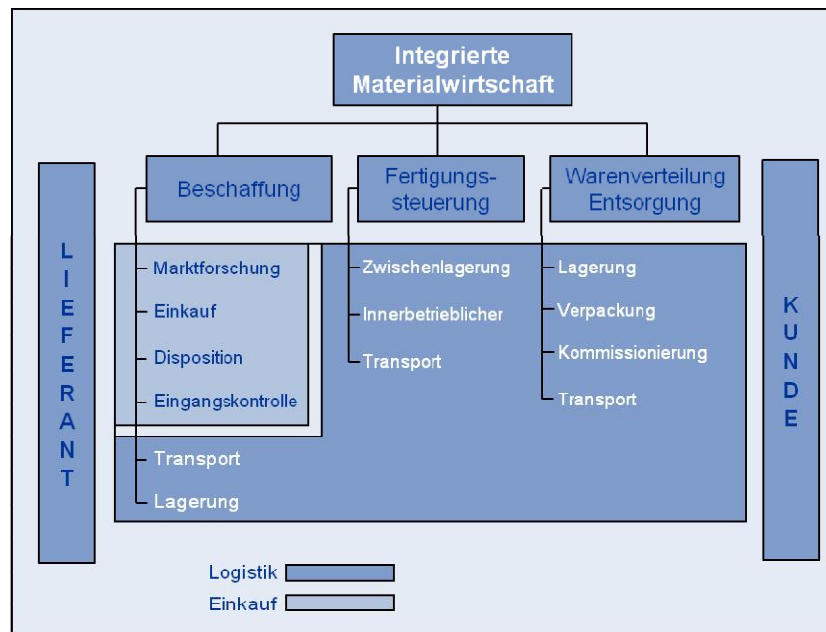

Seite 318, Abb. 1: Integrierte Materialwirtschaft und ihre Teilfunktionen  
(Vgl. Melzer-Ridinger, R.: Materialwirtschaft, München / Wien 1989, S. 10)

## KAPITEL D: MATERIALWIRTSCHAFT

### 1. GRUNDLAGEN DER MATERIALWIRTSCHAFT

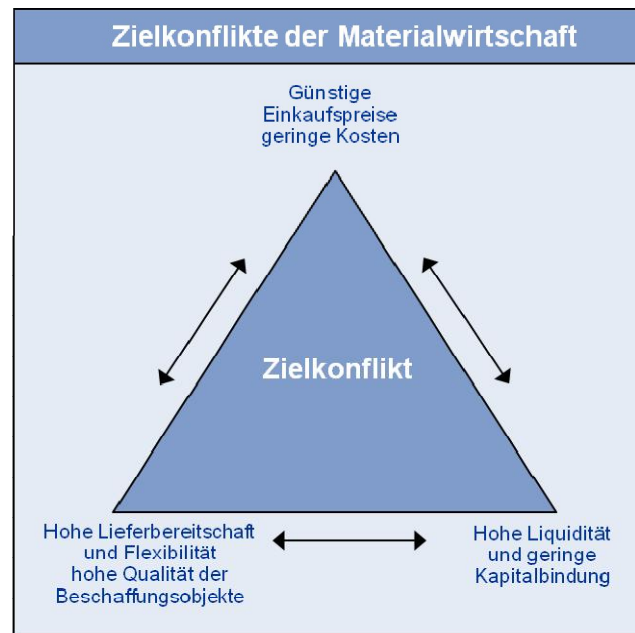

Seite 319, Abb. 2: Zielkonflikt der Materialwirtschaft

## KAPITEL D: MATERIALWIRTSCHAFT

### 1. GRUNDLAGEN DER MATERIALWIRTSCHAFT

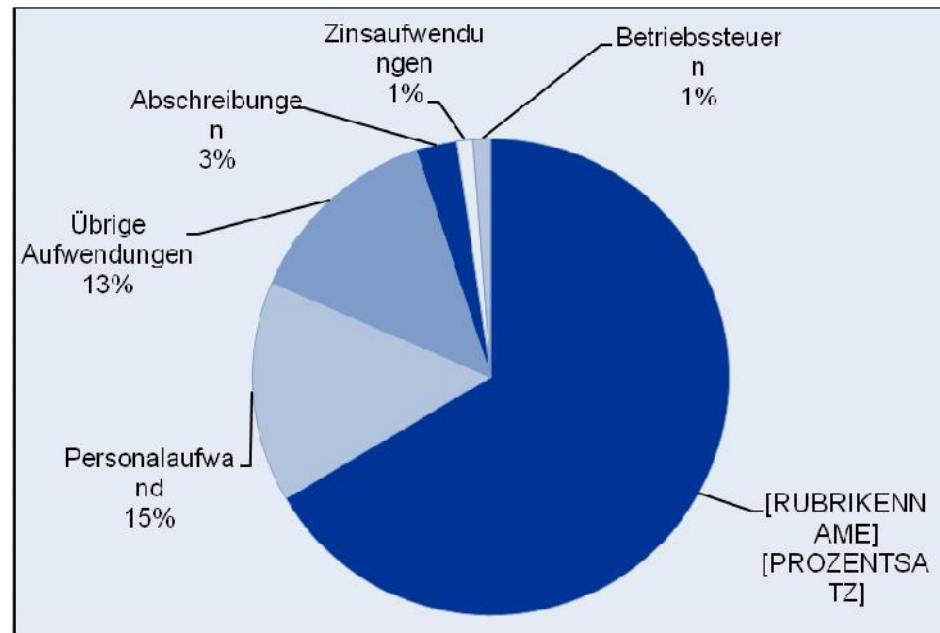

Seite 320, Abb. 3: Aufteilung der Gesamtkosten in einer Unternehmung 2012  
(Vgl. Deutsche Bundesbank: Hochgerechnete Angaben aus Jahresabschlüssen deutscher Unternehmen, Statistische Sonderveröffentlichung 5, Mai 2015. S. 4 ff)

## KAPITEL D: MATERIALWIRTSCHAFT

### 1. GRUNDLAGEN DER MATERIALWIRTSCHAFT

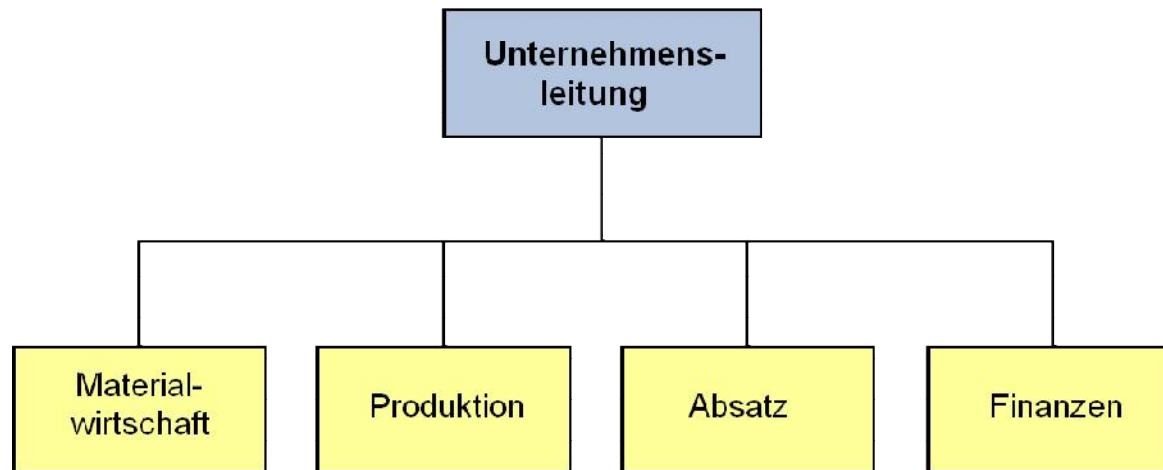

Seite 324, Abb. 4: Zentrale Unterstellung der Materialwirtschaft

## KAPITEL D: MATERIALWIRTSCHAFT

### 1. GRUNDLAGEN DER MATERIALWIRTSCHAFT

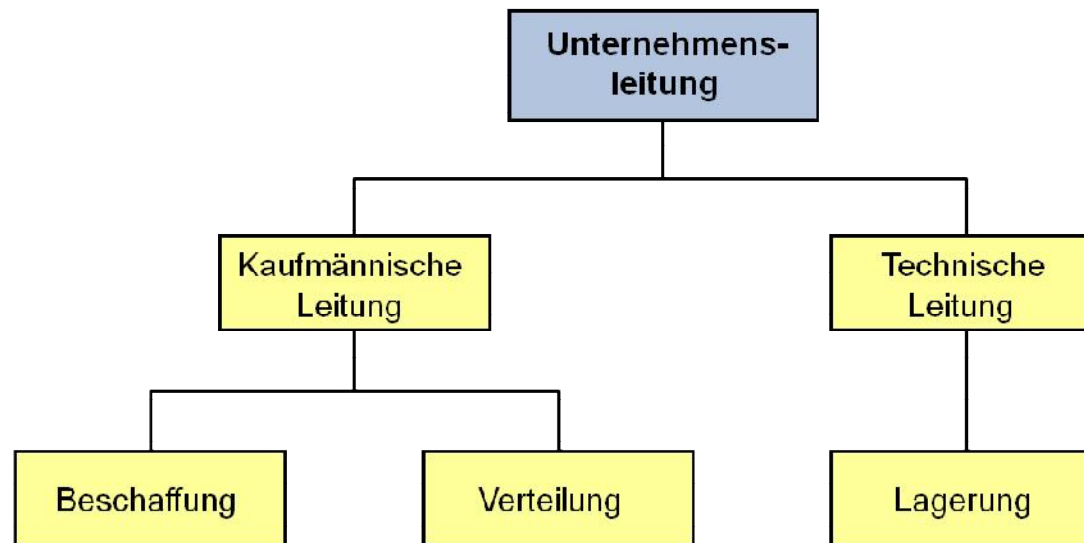

Seite 325, Abb. 5: Dezentrale Unterstellung der Materialwirtschaft  
(Vgl. Eschenbach, R.: Erfolgspotenzial Materialwirtschaft, München/ Wien 1990, S. 62 ff)



## **2. DAS BESCHAFFUNGSPOLITISCHE INSTRUMENTARIUM**

### 2.1 MATERIALANALYSE

### 2.2 MATERIALRATIONALISIERUNG

### 2.3 BESCHAFFUNGSMARKTFORSCHUNG

## KAPITEL D: MATERIALWIRTSCHAFT

### 2. DAS BESCHAFFUNGSPOLITISCHE INSTRUMENTARIUM

| Wertgruppe    | Anzahl der Positionen | Prozentanteil an der Gesamtzahl der Positionen | Jahresverbrauchs-wert in Mio. EUR | Prozentanteil am Gesamtwert |
|---------------|-----------------------|------------------------------------------------|-----------------------------------|-----------------------------|
| A             | 2.000                 | 20                                             | 48                                | 80                          |
| B             | 1.000                 | 10                                             | 9                                 | 15                          |
| C             | 7.000                 | 70                                             | 3                                 | 5                           |
| <b>Gesamt</b> | 10.000                | 100                                            | 60                                | 100                         |

Seite 327, Abb. 6: Beispiel für die Einteilung von 10.000 Materialpositionen mit einem Gesamtjahresverbrauchswert in Höhe von 60 Millionen EUR

(Vgl. Arnolds, H./ Heege, F./ Röh, C./ Tussing, W: Materialwirtschaft und Einkauf, 11. Aufl., Wiesbaden 2010,

Jung: Allgemeine Betriebswirtschaftslehre. De Gruyter Oldenbourg 2016. ISBN 978-3-486-76376-8

10

## KAPITEL D: MATERIALWIRTSCHAFT

### 2. DAS BESCHAFFUNGSPOLITISCHE INSTRUMENTARIUM

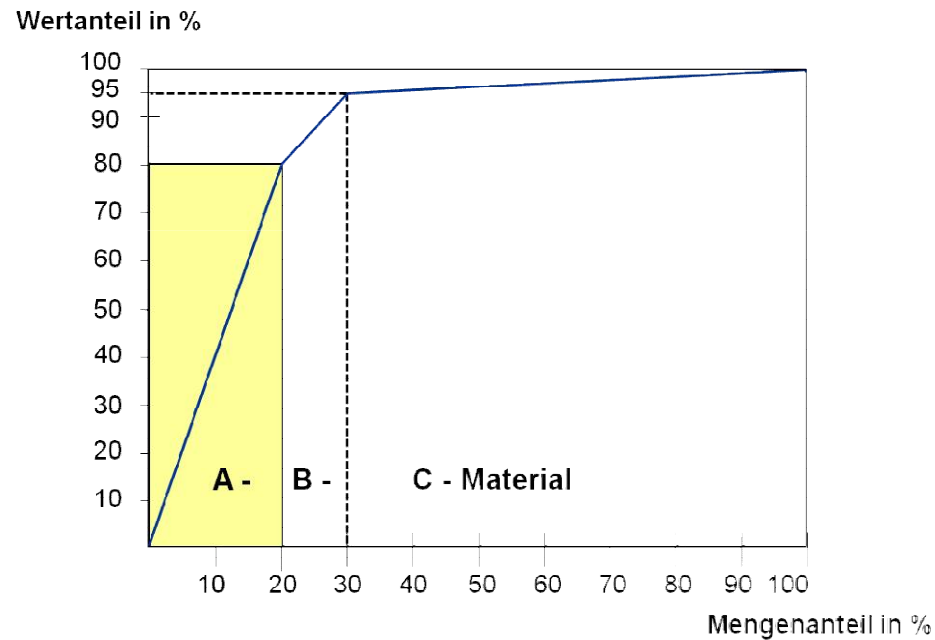

Seite 328, Abb. 7: Konzentrationskurve

## KAPITEL D: MATERIALWIRTSCHAFT

### 2. DAS BESCHAFFUNGSPOLITISCHE INSTRUMENTARIUM

| Vorhersage-<br>genauigkeit   | Wertigkeit                                       |                                                      |                                                      |
|------------------------------|--------------------------------------------------|------------------------------------------------------|------------------------------------------------------|
|                              | A                                                | B                                                    | C                                                    |
| <b>X-Gruppe</b><br>(hoch)    | hoher Verbrauchswert<br>hoher Vorhersagewert     | mittlerer Verbrauchswert<br>hoher Vorhersagewert     | niedriger Verbrauchswert<br>hoher Vorhersagewert     |
| <b>Y-Gruppe</b><br>(mittel)  | hoher Verbrauchswert<br>mittlerer Vorhersagewert | mittlerer Verbrauchswert<br>mittlerer Vorhersagewert | niedriger Verbrauchswert<br>mittlerer Vorhersagewert |
| <b>Z-Gruppe</b><br>(niedrig) | hoher Verbrauchswert<br>niedriger Vorhersagewert | mittlerer Verbrauchswert<br>niedriger Vorhersagewert | niedriger Verbrauchswert<br>niedriger Vorhersagewert |

Seite 329, Abb. 8: XYZ-Analyse

## KAPITEL D: MATERIALWIRTSCHAFT

### 2. DAS BESCHAFFUNGSPOLITISCHE INSTRUMENTARIUM

| Objekt      | Funktion                |
|-------------|-------------------------|
| Kühlschrank | Nahrungsmittel kühlen   |
| Uhr         | Zeit anzeigen           |
| Schraube    | Objekte befestigen      |
| Brille      | Sehfähigkeit verbessern |
| Generator   | Strom erzeugen          |
| Föhn        | Warme Luft erzeugen     |

Seite 331, Abb. 9: Objekt- und Funktionsbeschreibung

## KAPITEL D: MATERIALWIRTSCHAFT

### 2. DAS BESCHAFFUNGSPOLITISCHE INSTRUMENTARIUM

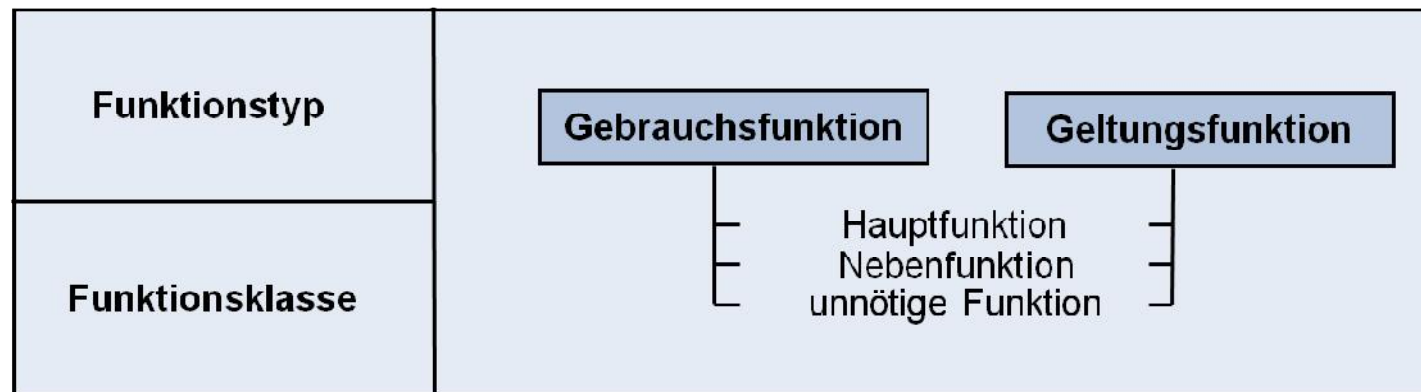

Seite 331, Abb. 10: Funktionen von Produktbestandteilen in der Wertanalyse

## KAPITEL D: MATERIALWIRTSCHAFT

### 2. DAS BESCHAFFUNGSPOLITISCHE INSTRUMENTARIUM

|                      | Gründe für Eigenfertigung                                                                                                                                                                                                                                                                                                           | Gründe für Fremdbezug                                                                                                                                                                                                                                                                              |
|----------------------|-------------------------------------------------------------------------------------------------------------------------------------------------------------------------------------------------------------------------------------------------------------------------------------------------------------------------------------|----------------------------------------------------------------------------------------------------------------------------------------------------------------------------------------------------------------------------------------------------------------------------------------------------|
| <b>Qualität</b>      | <ul style="list-style-type: none"> <li>• Enge Zusammenarbeit zwischen Konstruktion und Fertigung bei Neuentwicklungen und Verbesserungen</li> <li>• Laufende Kontrolle der Qualität</li> <li>• Ausnutzung eigener Schutzrechte und Fertigungs-Know-how</li> <li>• Aneignung spezifischen Produktions-Know-hows</li> </ul>           | <ul style="list-style-type: none"> <li>• Hohe Qualität durch Spezialisierung der Produktionsmittel</li> <li>• Gezielte Problemlösungen durch Spezialisierung im Entwicklungsbereich</li> <li>• Nutzung fremden Know-hows</li> </ul>                                                                |
| <b>Kapazitäten</b>   | <ul style="list-style-type: none"> <li>• Auslasten vorhandener Kapazitäten               <ul style="list-style-type: none"> <li>- Personal</li> <li>- Sachmittel</li> </ul> </li> </ul>                                                                                                                                             | <ul style="list-style-type: none"> <li>• Vermeiden der Unterauslastung von spezialisierten Produktionsmitteln</li> <li>• Abbauen von Kapazitätsengpässen</li> </ul>                                                                                                                                |
| <b>Investitionen</b> | <ul style="list-style-type: none"> <li>• Verminderung steuerpflichtiger Gewinne durch Investitionen</li> <li>• Modernisierung und Spezialisierung des Sachmittelpotenzials</li> </ul>                                                                                                                                               | <ul style="list-style-type: none"> <li>• Keine Kapitalbindung durch zusätzliche Investitionen</li> <li>• Konzentration der Finanzmittel auf wichtiges Fertigungs-Know-how</li> </ul>                                                                                                               |
| <b>Kosten</b>        | <ul style="list-style-type: none"> <li>• Einsparung von               <ul style="list-style-type: none"> <li>- außerbetrieblichen Transport- und Verpackungskosten</li> <li>- Lieferantengewinnen und Handelsgewinnspannen</li> </ul> </li> <li>• Unabhängigkeit von Preiserhöhungen bei Monopolstellung der Lieferanten</li> </ul> | <ul style="list-style-type: none"> <li>• Geringe Stückkosten durch Spezialisierung und hohe Auslastung der Produktionsmittel</li> <li>• Verlagerung von Teilen mit geringem Beitrag zum finanziellen Unternehmenserfolg, Geringe Entwicklungskosten</li> <li>• Geringer Fixkostenanteil</li> </ul> |

Seite 334, Abb. 11 (Teil 1): Gründe für Eigenfertigung und Fremdbezug  
(Vgl. Melzer-Ridinger, R.: Materialwirtschaft, München/ Wien 1989, S. 57)

## KAPITEL D: MATERIALWIRTSCHAFT

### 2. DAS BESCHAFFUNGSPOLITISCHE INSTRUMENTARIUM

|                 |                                                                                                                                                                                                                                                                                                                                                                                                       |                                                                                                                                                                                                                                                                |
|-----------------|-------------------------------------------------------------------------------------------------------------------------------------------------------------------------------------------------------------------------------------------------------------------------------------------------------------------------------------------------------------------------------------------------------|----------------------------------------------------------------------------------------------------------------------------------------------------------------------------------------------------------------------------------------------------------------|
| <b>Termine</b>  | <ul style="list-style-type: none"> <li>• Schnelle Reaktion bei               <ul style="list-style-type: none"> <li>- Innovationen</li> <li>- Modelländerungen</li> <li>- Produktionsschwankungen durch kürzere Informations- und Organisationswege sowie direkte Weisungsbefugnis,</li> </ul> </li> <li>• Verbesserte Kontrolle der Terminhaltung,</li> <li>• Wegfall von Transportzeiten</li> </ul> | <ul style="list-style-type: none"> <li>• Abruf von Lieferungen nach Bedarf</li> <li>• Beseitigung von Terminengpässen in der eigenen Produktion</li> </ul>                                                                                                     |
| <b>Risiko</b>   | <ul style="list-style-type: none"> <li>• Geheimhaltung des vorhandenen Know-hows vor der Konkurrenz</li> <li>• Verhindern der Vorwärtsintegration von Lieferanten</li> <li>• Geheimhaltung von Neuentwicklungen</li> </ul>                                                                                                                                                                            | <ul style="list-style-type: none"> <li>• Risikostreuung durch Verteilung auf mehrere Lieferanten</li> <li>• Geringeres Risiko bei Produktionsrückgang oder bei Entwicklungsfehlschlägen</li> </ul>                                                             |
| <b>Absatz</b>   | <ul style="list-style-type: none"> <li>• Kuppelprodukte können evtl. in das Verkaufsprogramm übernommen werden</li> </ul>                                                                                                                                                                                                                                                                             | <ul style="list-style-type: none"> <li>• Hohes Qualitätsimage des Lieferanten kann zu Kundenpräferenzen führen</li> </ul>                                                                                                                                      |
| <b>Sonstige</b> | <ul style="list-style-type: none"> <li>• Keine geeigneten Zulieferer auf dem Markt vorhanden</li> <li>• Verstärken der Unternehmensautonomie durch Erweitern der Fertigungstiefe</li> <li>• Transportprobleme</li> </ul>                                                                                                                                                                              | <ul style="list-style-type: none"> <li>• Abwicklung von Gegengeschäften</li> <li>• Reklamationsmöglichkeiten</li> <li>• Bezug kleiner Stückzahlen</li> <li>• Spezialisierung des eigenen Unternehmens auf Produkte mit wesentlichen Know-how-Anteil</li> </ul> |

Seite 334, Abb. 11 (Teil 2): Gründe für Eigenfertigung und Fremdbezug  
(Vgl. Melzer-Ridinger, R.: Materialwirtschaft, München/ Wien 1989, S. 57)



## KAPITEL D: MATERIALWIRTSCHAFT

### 2. DAS BESCHAFFUNGSPOLITISCHE INSTRUMENTARIUM

| Einflussfaktoren             | Fragestellungen                                                                                                                              |
|------------------------------|----------------------------------------------------------------------------------------------------------------------------------------------|
| <b>Beschaffbarkeit</b>       | Ist die fragliche Leistung oder Technologie am Beschaffungsmarkt verfügbar bzw. kann sie verfügbar gemacht werden?                           |
| <b>Versorgungssicherheit</b> | Ist die Versorgungssicherheit des Unternehmens auch bei einer Buy-Entscheidung in gleicher Weise gewährleistet wie bei einer Eigenfertigung? |
| <b>Qualität</b>              | Welchen Einfluss hat die Buy-Entscheidung auf die Produktqualität?                                                                           |
| <b>Investitionen</b>         | Sind bei einer Make-Entscheidung Ersatzinvestitionen zur Aufrechterhaltung der erforderlichen Kapazitäten erforderlich?                      |
| <b>Risiken</b>               | Sind die Risiken - gleich welcher Art - bei Buy größer als bei Make?                                                                         |
| <b>Know-how</b>              | Kann bei Fremdbezug ein Know-how Vorsprung verloren gehen?                                                                                   |
| <b>Image</b>                 | Welche Erwartungen stellen die Kunden an uns?<br>Bewirkt ein Fremdbezug eine Imagebeeinträchtigung?                                          |
| <b>Umwelt</b>                | Löst eine Buy-Entscheidung Umweltprobleme für das Unternehmen oder werden neue geschaffen?                                                   |
| <b>Gesamtkosten</b>          | Wie wirkt sich eine Buy-Entscheidung auf die Kostensituation des Unternehmens aus?                                                           |

Seite 335, Abb. 12: Einflussfaktoren auf die Make-or-Buy-Entscheidung

## KAPITEL D: MATERIALWIRTSCHAFT

### 2. DAS BESCHAFFUNGSPOLITISCHE INSTRUMENTARIUM

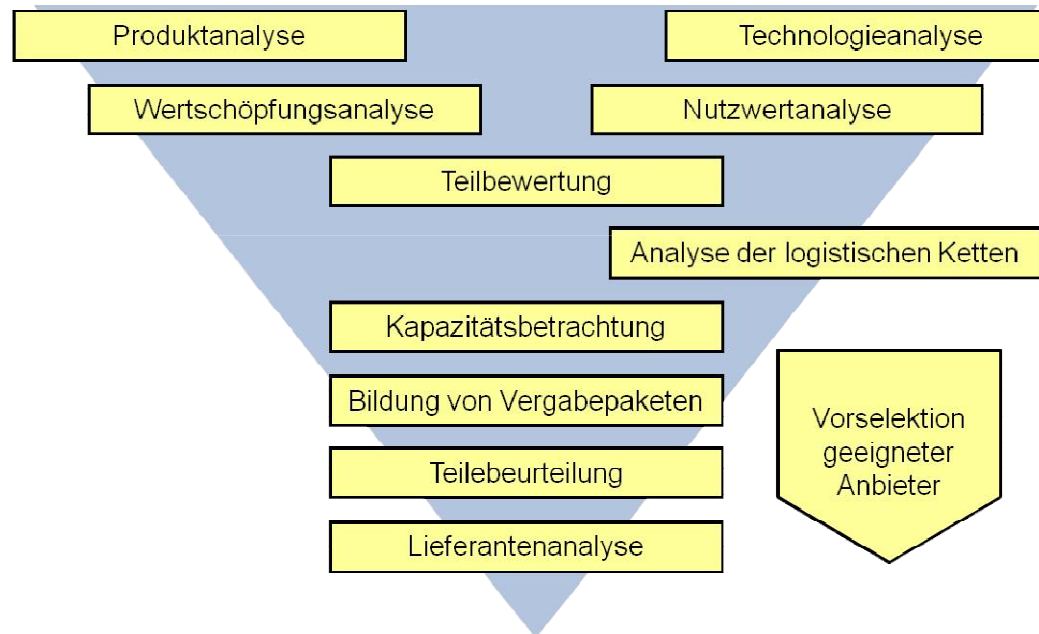

Seite 336, Abb. 13: Einflussfaktoren auf die Make-or-Buy-Entscheidung

## KAPITEL D: MATERIALWIRTSCHAFT

### 2. DAS BESCHAFFUNGSPOLITISCHE INSTRUMENTARIUM

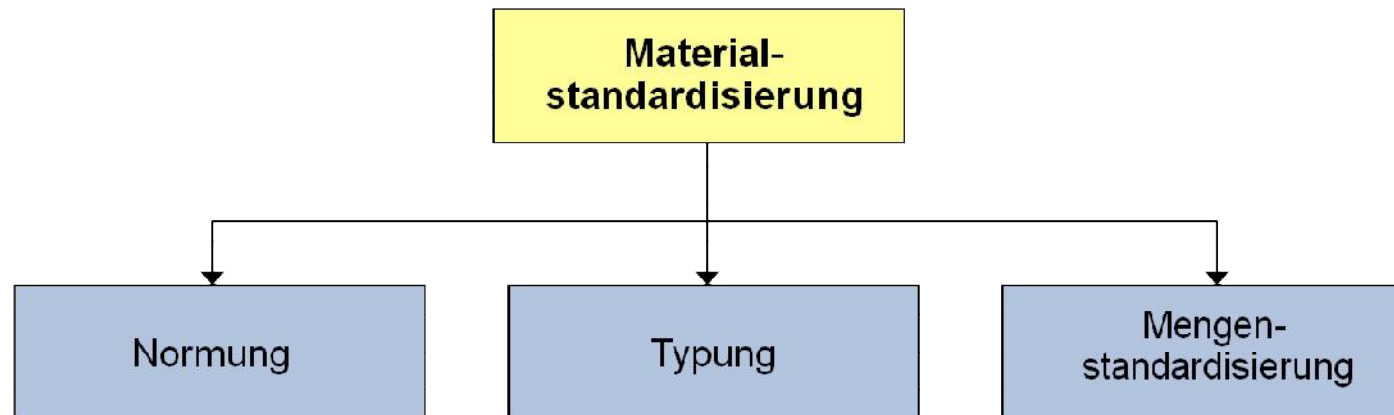

Seite 338, Abb. 14: Arten der Materialstandardisierung

## KAPITEL D: MATERIALWIRTSCHAFT

### 2. DAS BESCHAFFUNGSPOLITISCHE INSTRUMENTARIUM

| Norm                   | Inhalt                                                                                                                                                    |
|------------------------|-----------------------------------------------------------------------------------------------------------------------------------------------------------|
| <b>Sicherheitsnorm</b> | Norm, die Regeln, Verfahren, Einrichtungen festlegt, welche Sicherheit und den Schutz von Leben und Gesundheit sowie von Sachwerten dienen.               |
| <b>Sortierungsnorm</b> | Norm, die Einteilung von Größen und Qualitäten, die in einer nicht beeinflussbaren Vielfalt anfallen, in bestimmte Sorten, Gruppen oder Klassen festlegt. |
| <b>Stoffnorm</b>       | Norm, die physikalische, chemische und technologische Eigenschaften von Stoffen, ihre Einteilung sowie Richtlinien für ihre Verwendung festlegt.          |

Seite 340, Abb. 15 (Teil 2): Inhalt der Normen nach DIN 820

## KAPITEL D: MATERIALWIRTSCHAFT

### 2. DAS BESCHAFFUNGSPOLITISCHE INSTRUMENTARIUM

| Norm                      | Inhalt                                                                                                               |
|---------------------------|----------------------------------------------------------------------------------------------------------------------|
| <b>Teilenorm</b>          | Norm für Einzelteile.                                                                                                |
| <b>Typnorm</b>            | Norm, welche die Stufung bestimmter Erzeugnisse nach Art, Form, Größe oder sonstigen gemeinsamen Merkmalen festlegt. |
| <b>Verfahrensnorm</b>     | Norm, die Arbeitsverfahren zum Fertigen von Erzeugnissen festlegt.                                                   |
| <b>Verständigungsnorm</b> | Norm, die Verständigungsmittel festlegt.                                                                             |
| <b>Terminologienorm</b>   | Norm, die Benennung und Definitionen für Fachbegriffe zu Verständigungszwecken festlegt.                             |

Seite 340, Abb. 15 (Teil 3): Inhalt der Normen nach DIN 820

## KAPITEL D: MATERIALWIRTSCHAFT

### 2. DAS BESCHAFFUNGSPOLITISCHE INSTRUMENTARIUM

|                                |                                                                                          |
|--------------------------------|------------------------------------------------------------------------------------------|
| <b>Technische Fragen</b>       | Roh-, Hilfs- oder Betriebsstoff<br>Abmessungen, Farbe, Bauart<br>Übergeordnete Baugruppe |
| <b>Kaufmännische Fragen</b>    | Preisstellung<br>Maßeinheiten<br>ABC-Klassifizierung                                     |
| <b>Organisatorische Fragen</b> | Zuständiger Einkäufer<br>Lagerplatz<br>Budgetzugehörigkeit                               |
| <b>Dispositive Fragen</b>      | Bestellpunkt- oder<br>Bestellrhythmusdisposition<br>Mehrfach- oder Einmalverwendung      |

Seite 343, Abb. 16: Zusätzliche Informationen bei klassifizierenden Nummernsystemen

## KAPITEL D: MATERIALWIRTSCHAFT

### 2. DAS BESCHAFFUNGSPOLITISCHE INSTRUMENTARIUM

**Artikel-Nr. für Aluminium – Folie, blau, Stärke 0,12 mm 31 AS0812PA**

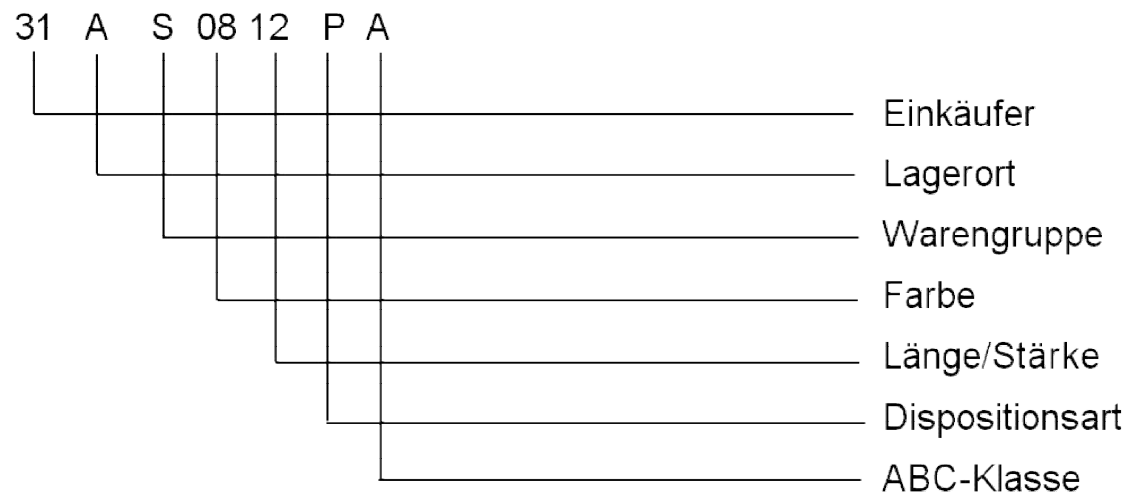

Seite 343, Abb. 17: Beispiel für ein alphanumerisches Nummernsystem

## KAPITEL D: MATERIALWIRTSCHAFT

### 2. DAS BESCHAFFUNGSPOLITISCHE INSTRUMENTARIUM

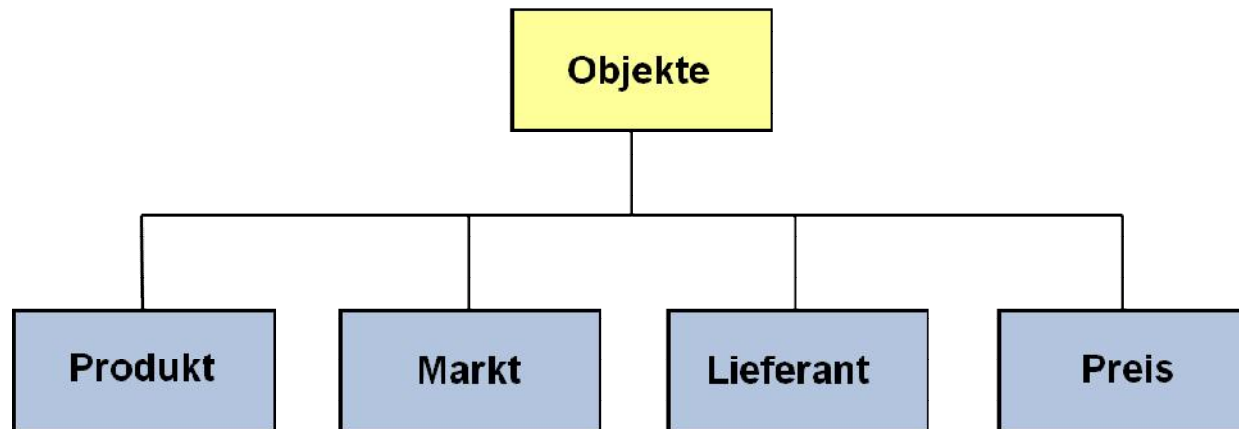

Seite 345, Abb. 18: Untersuchungsobjekte der Beschaffungsmarktforschung



## KAPITEL D: MATERIALWIRTSCHAFT

### 2. DAS BESCHAFFUNGSPOLITISCHE INSTRUMENTARIUM

|                                    | Preisstrukturanalyse                                                              | Preisbeobachtung                                                                                        | Preisvergleich                                                                                                            |
|------------------------------------|-----------------------------------------------------------------------------------|---------------------------------------------------------------------------------------------------------|---------------------------------------------------------------------------------------------------------------------------|
| <b>Untersuchungs-<br/>objekt</b>   | Zusammensetzung des Preises eines Lieferanten aus Kostenbestandteilen und Gewinn. | Veränderung des Preises seines Produktes im Laufe der Zeit.                                             | Preise verschiedener Lieferanten bzw. verschiedener Qualitäten.                                                           |
| <b>Untersuchungs-<br/>ziel</b>     | Überprüfung der Angemessenheit eines Preises als Grundlage der Preisverhandlung.  | Prognose der zukünftigen Entwicklung als Grundlage der Beschaffungsdisposition und der Kontraktpolitik. | Auswahl von Produktqualität und Lieferanten (im Rahmen des Angebotsvergleichs).                                           |
| <b>Hauptanwendungs-<br/>gebiet</b> | Produkte, auf deren Preishöhe der Abnehmer Einfluss ausüben kann.                 | Produkte, die eine hohe Preisvariabilität aufweisen.                                                    | Produkte, die zu unterschiedlichen Preisen und unterschiedlicher Qualität von mehreren Lieferanten bezogen werden können. |

Seite 349, Abb. 19: Die auf den Preis gerichteten Untersuchungen  
(Vgl. Arnolds, H./ Heege, F./ Röh, C./ Tussing, W: Materialwirtschaft und Einkauf, 11. Aufl.,  
Wiesbaden 2010, S.71)

*Jung: Allgemeine Betriebswirtschaftslehre. De Gruyter Oldenbourg 2016. ISBN 978-3-486-76376-8*

## KAPITEL D: MATERIALWIRTSCHAFT

### 2. DAS BESCHAFFUNGSPOLITISCHE INSTRUMENTARIUM

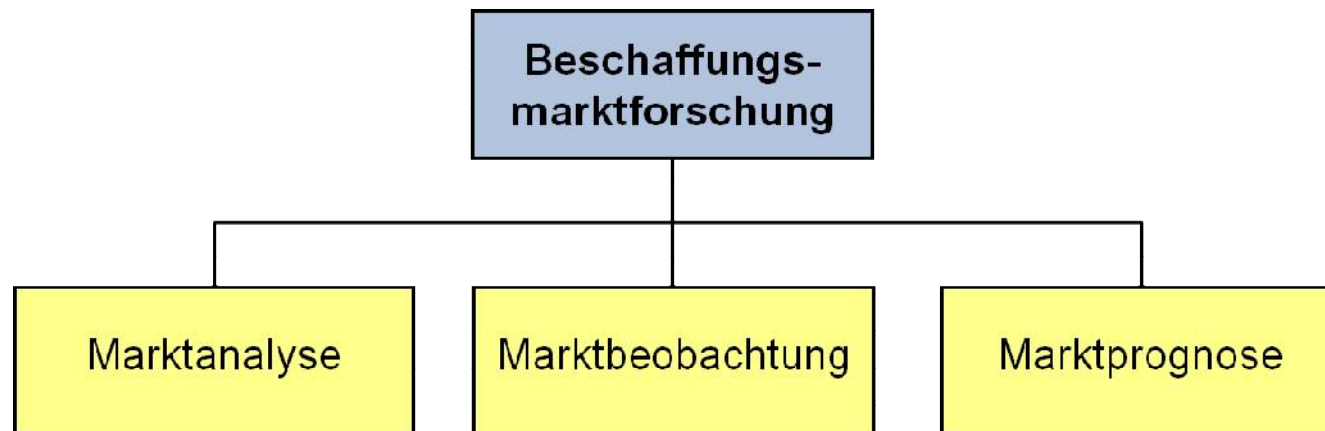

Seite 350, Abb. 20: Beschaffungsmarktforschung

### **3. BESCHAFFUNGSPOLITIK**

#### 3.1 LIEFERANTENPOLITIK

#### 3.2 KONTRAKTPOLITIK

#### 3.3 BESCHAFFUNGSSTRATEGIEN

## KAPITEL D: MATERIALWIRTSCHAFT

### 3. BESCHAFFUNGSPOLITIK

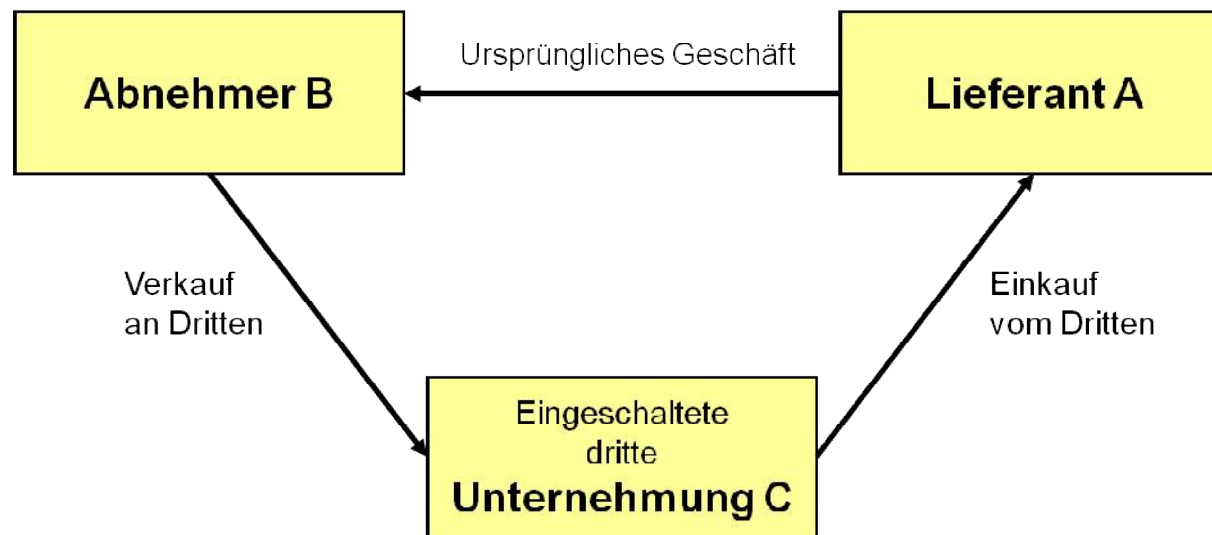

Seite 355, Abb. 21: Indirektes Gegengeschäft (mit drei Parteien)  
(Vgl. Arnolds, H./ Heege, F./ Röh, C./ Tussing, W: Materialwirtschaft und Einkauf, 11. Aufl.,  
Wiesbaden 2010, S. 227)

## KAPITEL D: MATERIALWIRTSCHAFT

### 3. BESCHAFFUNGSPOLITIK

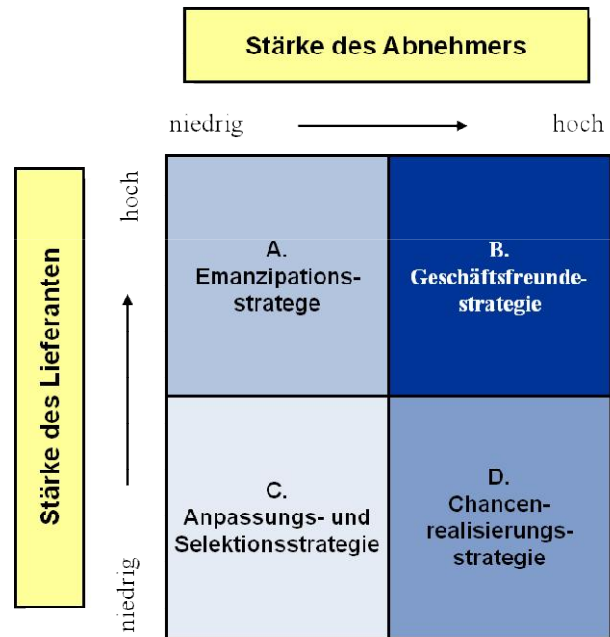

Seite 364, Abb. 22: Marktmacht-Portfolio

## KAPITEL D: MATERIALWIRTSCHAFT

### 3. BESCHAFFUNGSPOLITIK

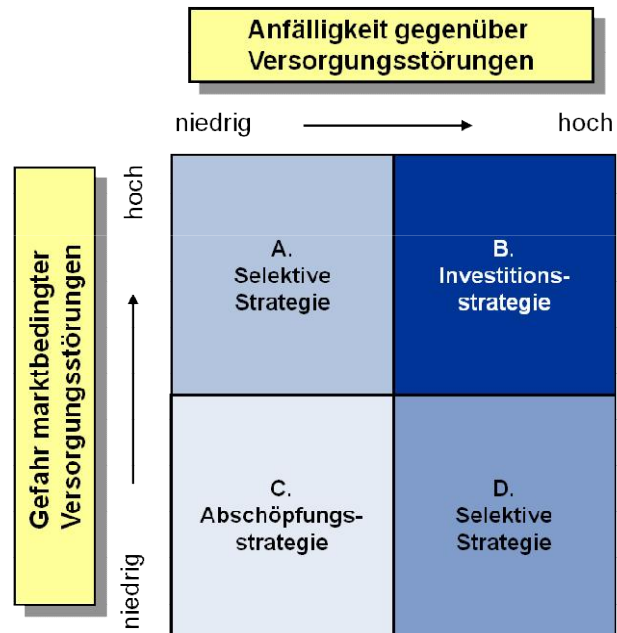

Seite 366, Abb. 23: Risiko-Portfolio

## KAPITEL D: MATERIALWIRTSCHAFT

### 3. BESCHAFFUNGSPOLITIK

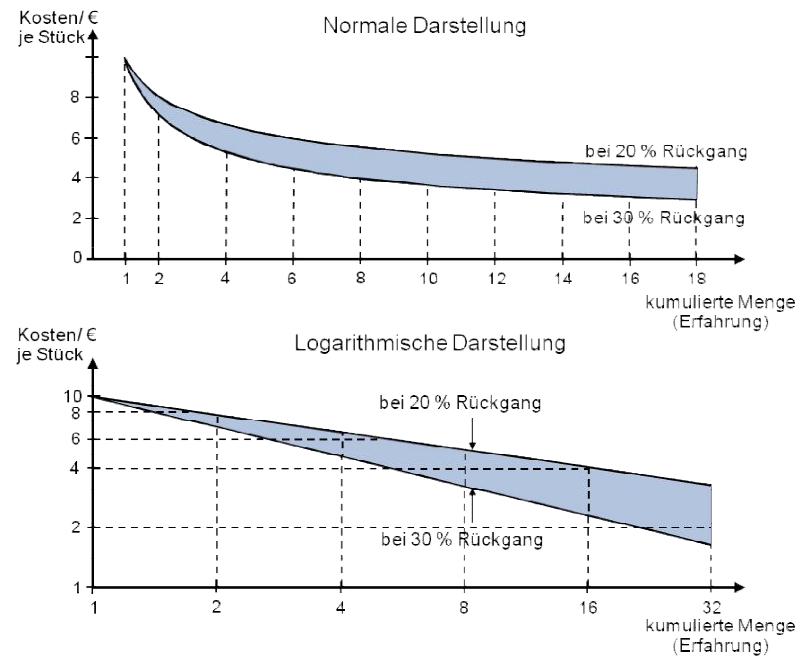

Seite 368, Abb. 24: Kosten-Erfahrungskurve bei linear bzw. logarithmisch eingeteilten Ordinaten

## 4. MATERIALDISPOSITION

4.1 BEDARFSPLANUNG

4.2 BESTANDSPLANUNG

4.3 BESCHAFFUNGSPLANUNG

4.4 BESCHAFFUNGSDURCHFÜHRUNG



## KAPITEL D: MATERIALWIRTSCHAFT

### 4. MATERIALDISPOSITION

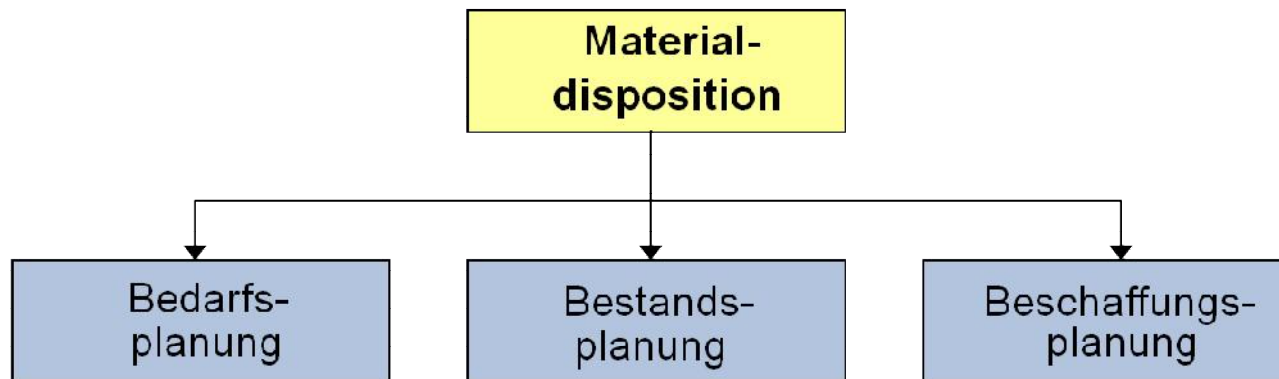

Seite 369, Abb. 25: Teilbereiche der Materialdisposition

## KAPITEL D: MATERIALWIRTSCHAFT

### 4. MATERIALDISPOSITION

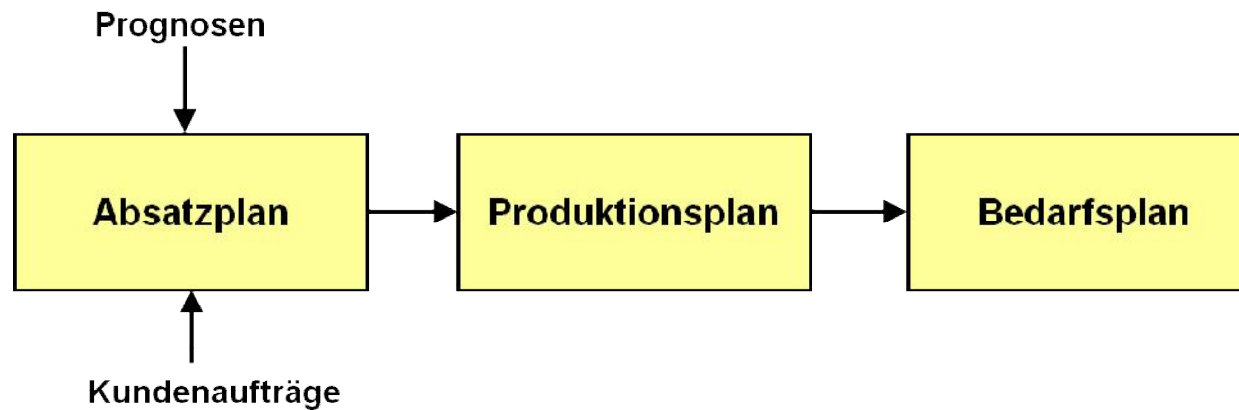

Seite 369, Abb. 26: Voraussetzungen zur Erstellung eines Bedarfsplanes

## KAPITEL D: MATERIALWIRTSCHAFT

### 4. MATERIALDISPOSITION

Erster Planungsabschnitt

|            |     |     |     |     |     |     |     |     |     |     |     |
|------------|-----|-----|-----|-----|-----|-----|-----|-----|-----|-----|-----|
| <b>JAN</b> | FEB | MÄR | APR | MAI | JUN | JUL | AUG | SEP | OKT | NOV | DEZ |
|------------|-----|-----|-----|-----|-----|-----|-----|-----|-----|-----|-----|

Zweiter Planungsabschnitt

|            |     |     |     |     |     |     |     |     |     |     |     |
|------------|-----|-----|-----|-----|-----|-----|-----|-----|-----|-----|-----|
| <b>FEB</b> | MÄR | APR | MAI | JUN | JUL | AUG | SEP | OKT | NOV | DEZ | JAN |
|------------|-----|-----|-----|-----|-----|-----|-----|-----|-----|-----|-----|

Dritter Planungsabschnitt

|            |                                  |  |  |  |  |  |  |  |  |  |  |
|------------|----------------------------------|--|--|--|--|--|--|--|--|--|--|
| <b>MÄR</b> | Hypothetische Planungsabschnitte |  |  |  |  |  |  |  |  |  |  |
|------------|----------------------------------|--|--|--|--|--|--|--|--|--|--|

Seite 371, Abb. 27: Das Prinzip der rollenden Planung

## KAPITEL D: MATERIALWIRTSCHAFT

### 4. MATERIALDISPOSITION

| Erzeugnis F |            |       |
|-------------|------------|-------|
| Teil-Nr.    | Ident.-Nr. | Menge |
| 1           | A          | 2     |
| 2           | B          | 5     |
| 3           | a          | 25    |
| 4           | b          | 6     |
| 5           | c          | 25    |

Seite 372, Abb. 28: Mengenübersichtsstückliste zum Erzeugnis F

## KAPITEL D: MATERIALWIRTSCHAFT

### 4. MATERIALDISPOSITION

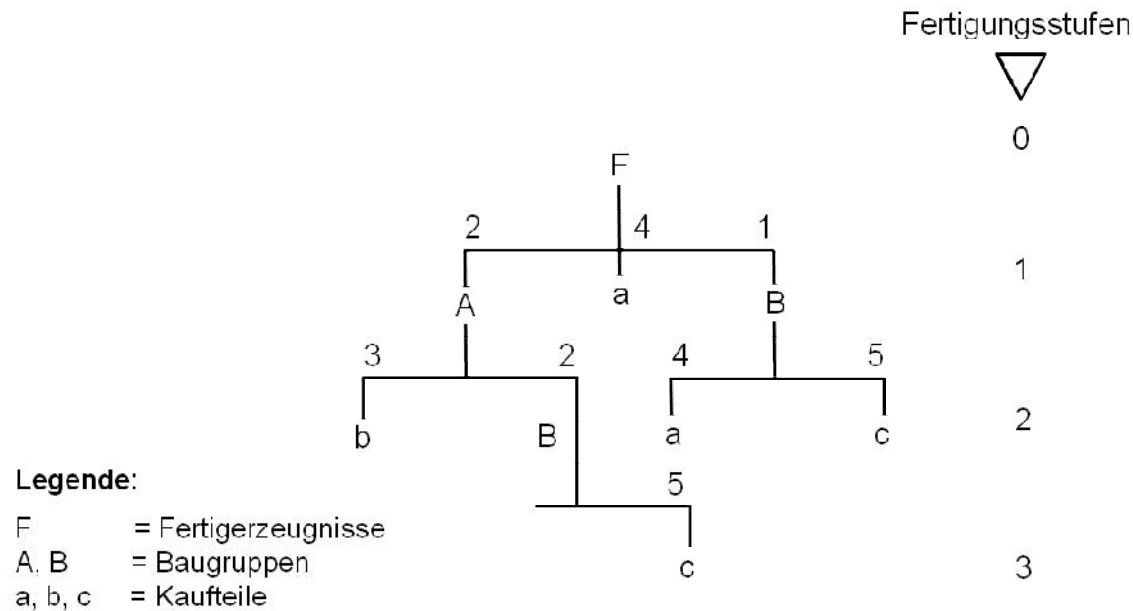

Seite 373, Abb. 29: Beispiel eines Erzeugnisstrukturbaums  
(Vgl. Arnolds, H./ Heege, F./ Röh, C./ Tussing, W: Materialwirtschaft und Einkauf, 11. Aufl.,  
Wiesbaden 2010, S. 138)

## KAPITEL D: MATERIALWIRTSCHAFT

### 4. MATERIALDISPOSITION

| Fertigungsstufe | Teile-Nr. | Menge |
|-----------------|-----------|-------|
| 1               | A         | 2     |
| 2               | B         | 3     |
| 2               | B         | 2     |
| 3               | a         | 4     |
| 3               | c         | 5     |
| 1               | a         | 4     |
| 1               | B         | 1     |
| 2               | a         | 4     |
| 2               | c         | 5     |

Seite 374, Abb. 30: Aufbau einer Strukturstückliste  
 (in Anlehnung an Arnolds, H. / Heege, F./ Tussing, W.: Materialwirtschaft und Einkauf, 9.Aufl.,  
Wiesbaden 1996, S. 83)

*Jung: Allgemeine Betriebswirtschaftslehre. De Gruyter Oldenbourg 2016. ISBN 978-3-486-76376-8*

## KAPITEL D: MATERIALWIRTSCHAFT

### 4. MATERIALDISPOSITION

| Teil-Nr. | F | Menge |
|----------|---|-------|
| 1.       | A | 2     |
| 2.       | B | 1     |
| 3.       | a | 4     |

Seite 374, Abb. 31: Baugruppe F

## KAPITEL D: MATERIALWIRTSCHAFT

### 4. MATERIALDISPOSITION

| Teil- Nr. | A | Menge |
|-----------|---|-------|
| 1.        | B | 2     |
| 2.        | b | 3     |

Seite 374, Abb. 32: Baugruppe A



## KAPITEL D: MATERIALWIRTSCHAFT

### 4. MATERIALDISPOSITION

| Teil- Nr. | B | Menge |
|-----------|---|-------|
| 1.        | a | 4     |
| 2.        | c | 5     |

Seite 374, Abb. 33: Baugruppe B

## KAPITEL D: MATERIALWIRTSCHAFT

### 4. MATERIALDISPOSITION

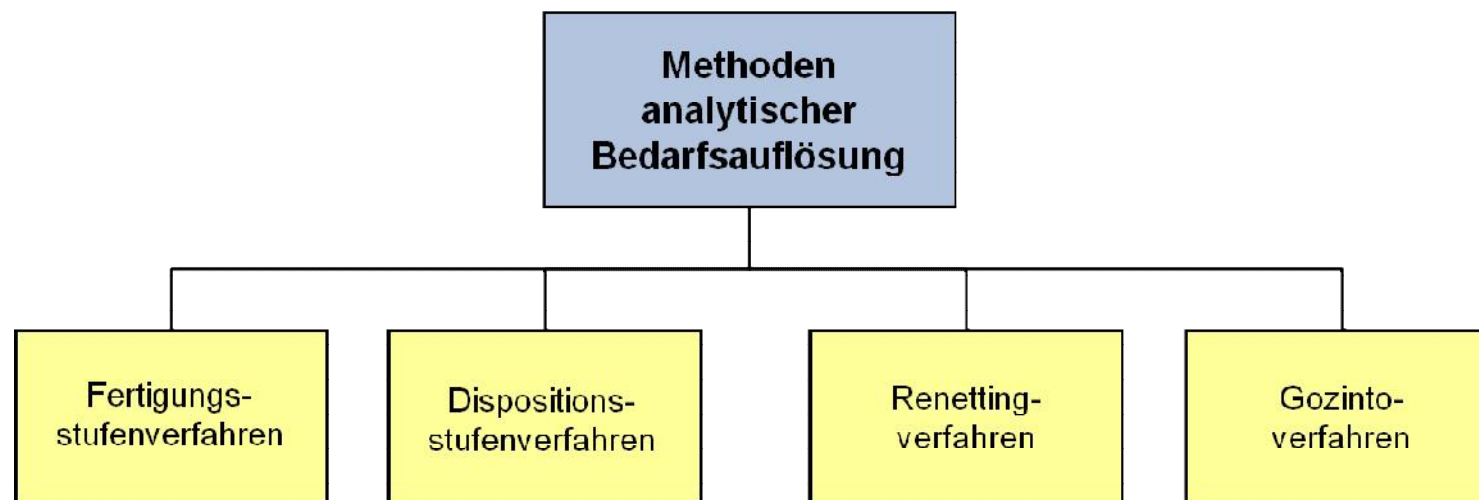

Seite 375, Abb. 34: Methoden analytischer Bedarfsauflösungen

## KAPITEL D: MATERIALWIRTSCHAFT

### 4. MATERIALDISPOSITION

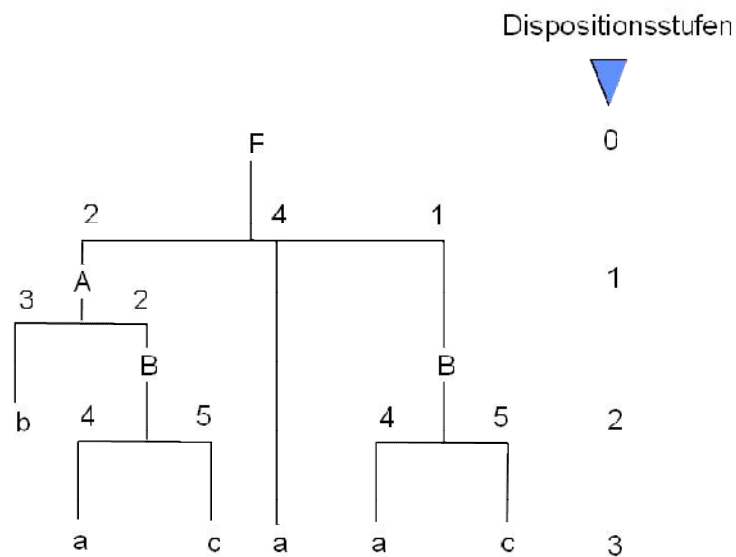

Seite 376, Abb. 35: Erzeugnisstrukturbaum nach Dispositionsstufen  
(Vgl. Arnolds, H./ Heege, F./ Röh, C./ Tussing, W: Materialwirtschaft und Einkauf, 11. Aufl.,  
Wiesbaden 2010, S. 89)

## KAPITEL D: MATERIALWIRTSCHAFT

### 4. MATERIALDISPOSITION

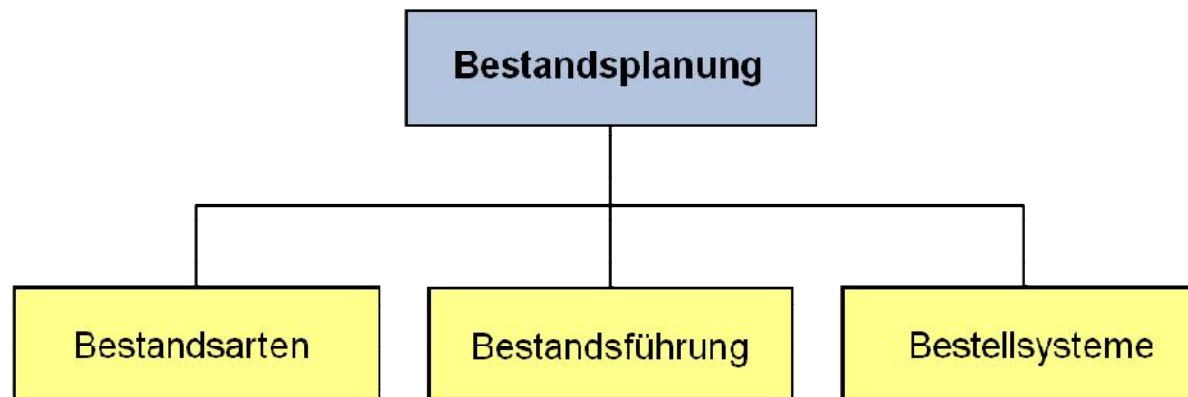

Seite 380, Abb. 36: Bestandsplanung

## KAPITEL D: MATERIALWIRTSCHAFT

### 4. MATERIALDISPOSITION

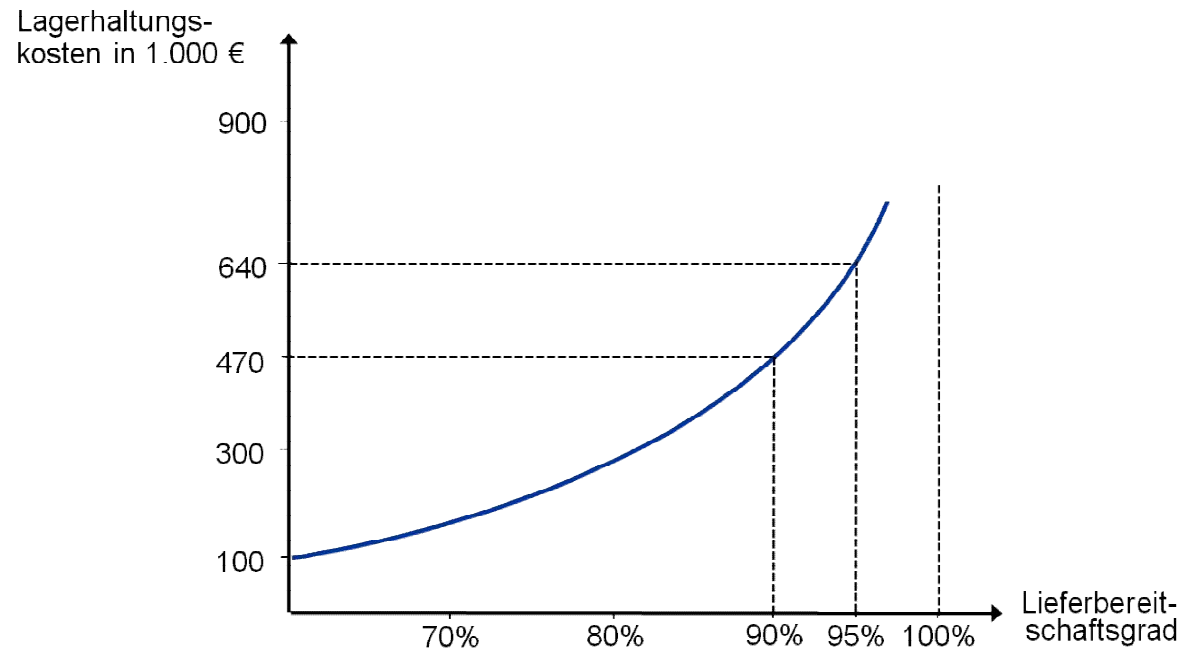

Seite 382, Abb. 37: Abhängigkeit der Lagerhaltungskosten vom Lieferbereitschaftsgrad

## KAPITEL D: MATERIALWIRTSCHAFT

### 4. MATERIALDISPOSITION

Lieferbereitschaftsgrad (%)

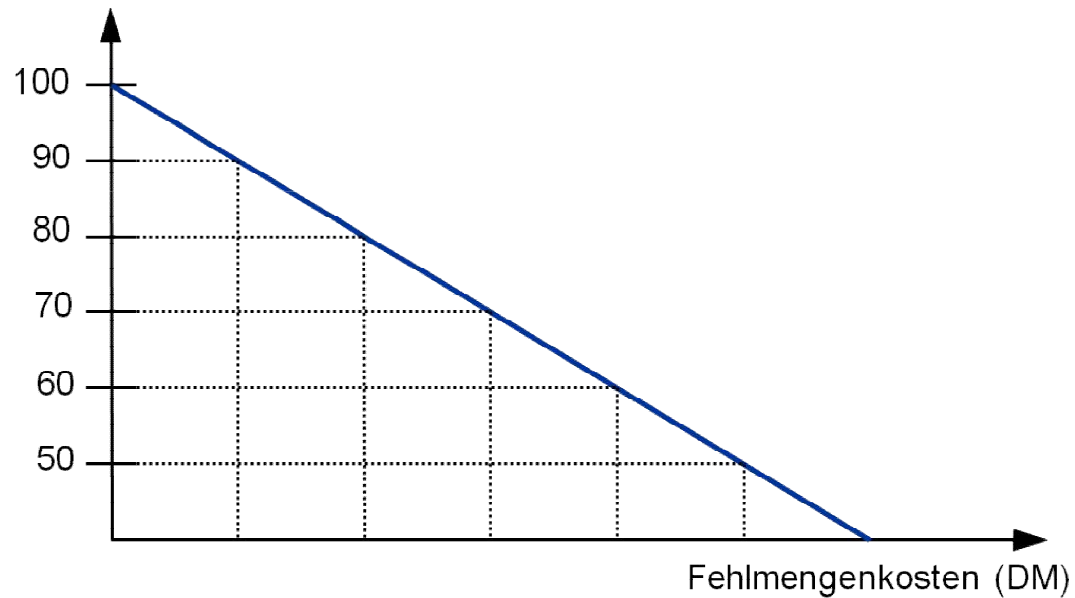

Seite 383, Abb. 38: Zusammenhang zwischen Lieferbereitschaftsgrad und Fehlmengenkosten  
(in Anlehnung an Oeldorf, G./ Olfert, K.: Materialwirtschaft, 12. Aufl., Ludwigshafen 2008)

## KAPITEL D: MATERIALWIRTSCHAFT

### 4. MATERIALDISPOSITION

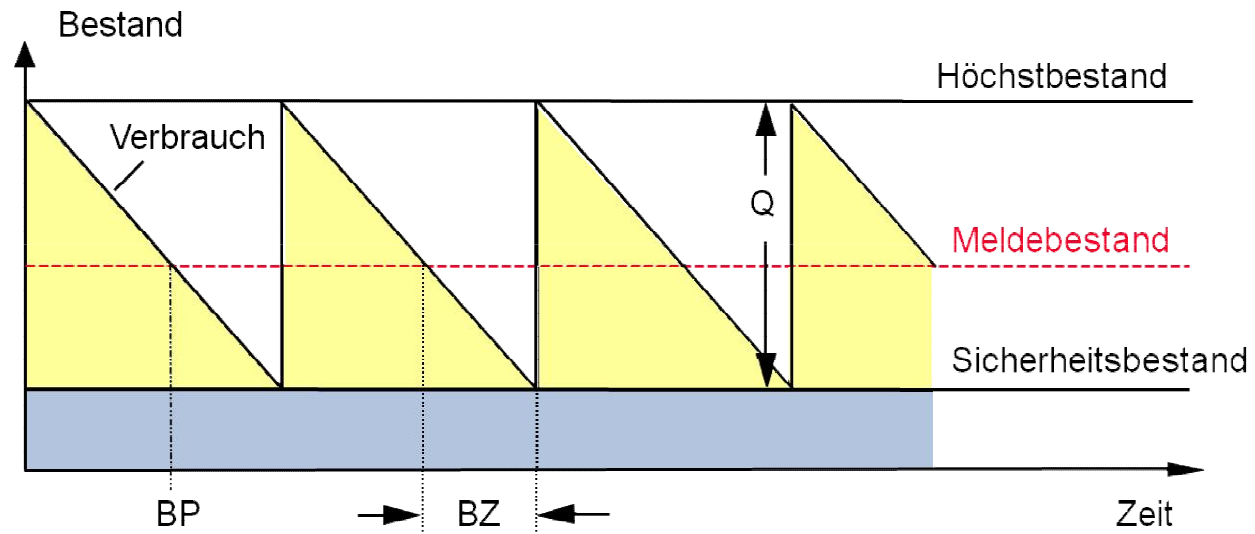

BP = Bestellpunkt; BZ = Beschaffungszeit; Q = Bestellmenge

Seite 383, Abb. 39: Darstellung der wichtigsten Bestandsarten

## KAPITEL D: MATERIALWIRTSCHAFT

### 4. MATERIALDISPOSITION

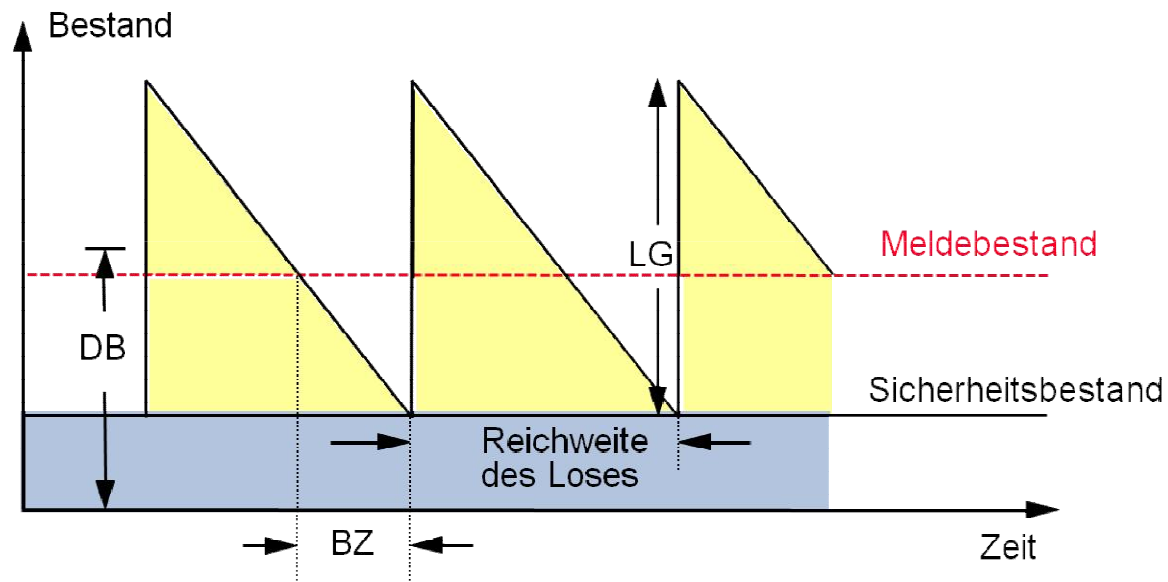

DB = Durchschnittlicher Bestand; BZ = Beschaffungszeit; LG = Lösgröße

Seite 385, Abb. 40: Lagerbewegungen beim Bestellpunktverfahren



## KAPITEL D: MATERIALWIRTSCHAFT

### 4. MATERIALDISPOSITION

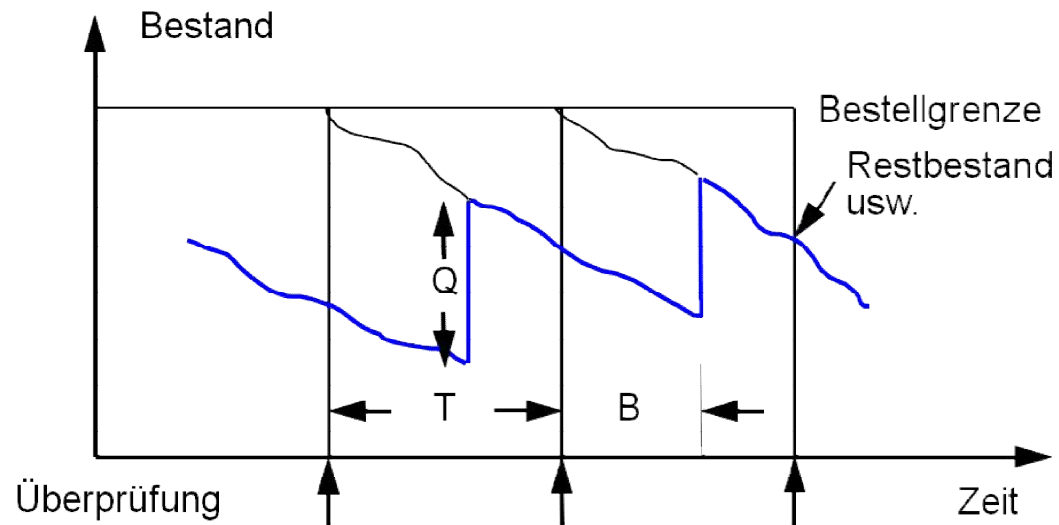

$T$  = Überprüfungsintervall       $Q$  = Bestellmenge

$B$  = Beschaffungszeit

Seite 386, Abb. 41: Bestandsverlauf beim Bestellrhythmusverfahren

## KAPITEL D: MATERIALWIRTSCHAFT

### 4. MATERIALDISPOSITION

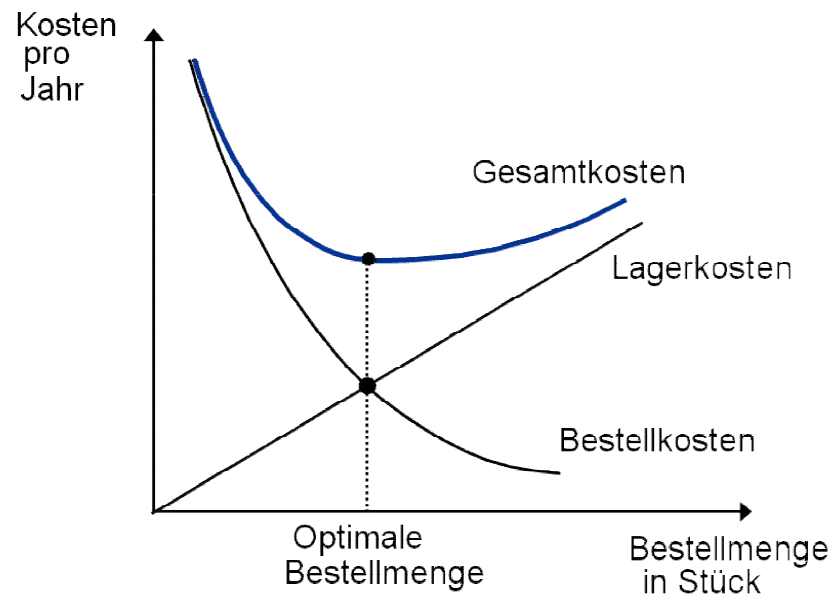

Seite 391, Abb. 42: Verhältnis der Bestellmenge zu den Kosten

## KAPITEL D: MATERIALWIRTSCHAFT

### 4. MATERIALDISPOSITION

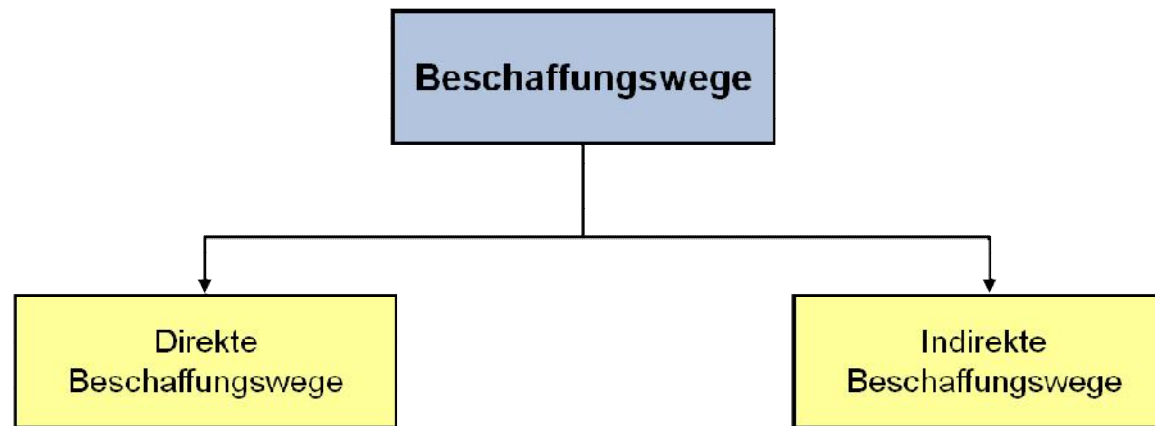

Seite 392, Abb. 43: Beschaffungswege  
(in Anlehnung an Oeldorf, G./ Olfert, K.: Materialwirtschaft, 12. Aufl., Ludwigshafen 2008, S.246)

## KAPITEL D: MATERIALWIRTSCHAFT

### 4. MATERIALDISPOSITION

| Feld für Lieferanschrift                                                                                                                                                                                                                                                                                                           |                   | Absender - Angaben<br>Anfrage - Nr. vom |         |                   |              |
|------------------------------------------------------------------------------------------------------------------------------------------------------------------------------------------------------------------------------------------------------------------------------------------------------------------------------------|-------------------|-----------------------------------------|---------|-------------------|--------------|
| Bitte unterbreiten Sie uns kostenlos bis spätestens... Ihr Angebot für die nachstehend aufgeführten Positionen unter Zugrundelegung unserer rückseitig vermerkten Einkaufsbedingung                                                                                                                                                |                   |                                         |         |                   |              |
| Material -Nr.                                                                                                                                                                                                                                                                                                                      | Materialbenennung | Menge                                   | Einheit | Preis pro Einheit | Preis gesamt |
| <div style="display: flex; justify-content: space-between; align-items: flex-end; padding: 10px;"> <div style="width: 45%;"> Liefertermin erwünscht:<br/> Zahlungsbedingungen:<br/> Lieferungsbedingungen: </div> <div style="width: 50%; text-align: right;"> Mit freundlichen Grüßen<br/> <b>MASCHINENBAU GMBH</b> </div> </div> |                   |                                         |         |                   |              |

Seite 396, Abb. 44: Formular für Angebotseinholung  
(in Anlehnung an Oeldorf, G. / Olfert, K.: Materialwirtschaft, 12. Aufl., Ludwigshafen 2008, S. 261)

## KAPITEL D: MATERIALWIRTSCHAFT

### 4. MATERIALDISPOSITION

| Formelle Angebotsprüfung                                              |                                                                                |
|-----------------------------------------------------------------------|--------------------------------------------------------------------------------|
| Materialart,<br>Materialmenge,<br>Materialqualität,<br>Materialpreis, | Lieferbedingungen,<br>Zahlungsbedingungen,<br>Erfüllungsort,<br>Gerichtsstand. |

Seite 397, Abb. 45: Angebotsprüfung

## KAPITEL D: MATERIALWIRTSCHAFT

### 4. MATERIALDISPOSITION

| Teile- Nr.....    |            | Lieferant A |     | Lieferant B |     | Lieferant C |     |
|-------------------|------------|-------------|-----|-------------|-----|-------------|-----|
| Kriterien         | Gewichtung | F           | G   | F           | G   | F           | G   |
| - Qualität        | 30         | 5           | 150 | 4           | 120 | 5           | 150 |
| - Preis           | 30         | 5           | 150 | 3           | 90  | 4           | 120 |
| - Terminsicherung | 15         | 2           | 30  | 4           | 60  | 5           | 75  |
| - Zuverlässigkeit | 15         | 3           | 45  | 4           | 60  | 5           | 75  |
| - Konditionen     | 5          | 4           | 20  | 5           | 25  | 2           | 10  |
| - Lage            | 5          | 4           | 20  | 3           | 15  | 5           | 25  |
| <b>Summe</b>      | <b>100</b> | <b>415</b>  |     | <b>370</b>  |     | <b>455</b>  |     |

Seite 399, Abb. 46: Lieferantenbewertung

## KAPITEL D: MATERIALWIRTSCHAFT

### 4. MATERIALDISPOSITION

| Mögliche Zielansprachen                                         | Verwendbare Argumente                                                                                                                                                                        |
|-----------------------------------------------------------------|----------------------------------------------------------------------------------------------------------------------------------------------------------------------------------------------|
| Anlieferungszeitpunkt verkürzen                                 | Engpasssituationen, lange Geschäftsbedingungen, Konjunkturlage, Teillieferung                                                                                                                |
| Einführung einer Konventionalstrafe                             | Darlegung möglicher Fehlmengenkosten, Lieferverzögerungen der Vergangenheit bzw. Erstauftrag, Hinweis auf Konkurrenzangebote                                                                 |
| Preise senken                                                   | Ergebnis der Preisstrukturanalyse, Auftragsgröße, Vorauszahlung, Bestellung bestimmter Vorprodukte, Branchenvergleich, Mengenprognosen, Preisgleitklauseln                                   |
| Übernahme von Werkzeugkosten                                    | Auftragsgröße, Anschlussverträge, Zuschuss, Branchenvergleich                                                                                                                                |
| Qualitätsniveau heben                                           | Hinweis auf Substitutionsmaterial, Auftreten von Reklamationen bei eigenen Fertigerzeugnissen, Verarbeitungsschwierigkeiten in der Fertigung, Ergebnisse der Qualitätsprüfung                |
| Übernahme der eigenen Einkaufsbedingungen durch den Lieferanten | Eigene Stellung am Beschaffungsmarkt, starker Konkurrenzkampf der Lieferanten um Marktanteile, Zweifel an den Angaben des Angebots, Darlegung der Problematik einzelner Vertragsbestimmungen |

Seite 401, Abb. 47: Zielansprachen und Argumente für Vergabeverhandlungen  
(Vgl. Arnolds, H./ Heege, F./ Röh, C./ Tussing, W: Materialwirtschaft und Einkauf, 11. Aufl.,  
Wiesbaden 2010, S. 177ff)

*Jung: Allgemeine Betriebswirtschaftslehre. De Gruyter Oldenbourg 2016. ISBN 978-3-486-76376-8*

## KAPITEL D: MATERIALWIRTSCHAFT

### 4. MATERIALDISPOSITION

| Körperhaltung                                                                                                                            |                                                                                                                                       |
|------------------------------------------------------------------------------------------------------------------------------------------|---------------------------------------------------------------------------------------------------------------------------------------|
|  erstaunt<br>dominant<br>unentschlossen<br>misstrauisch |  schüchtern<br>unsicher<br>bescheiden<br>traurig     |
|  desinteressiert<br>resigniert<br>zweifelnd<br>fragend  |  selbstzufrieden<br>ungeduldig<br>zwanglos<br>wütend |
| Mimik, Gestik                                                                                                                            |                                                                                                                                       |
| Hände über Brust verschränken                                                                                                            | → Abwehrhaltung                                                                                                                       |
| Augenbrauen hochziehen                                                                                                                   | → etwas nicht glauben                                                                                                                 |
| Finger trommeln                                                                                                                          | → ungeduldig werden                                                                                                                   |
| Beine übereinanderschlagen                                                                                                               | → Gesprächsführung anstreben                                                                                                          |
| Einstellungsrichtung                                                                                                                     |                                                                                                                                       |
| launisch, pessimistisch,<br>ernsthaft, schweigsam,<br>bedrückt<br><b>Introvertiert</b>                                                   | empfindlich, unruhig,<br>aggressiv, reizbar,<br>impulsiv, aktiv<br><b>Extrovertiert</b>                                               |
| melancholisch<br>passiv,<br>nachdenklich,<br>zuverlässig,<br>beherrscht                                                                  | cholisch<br>phlegmatisch<br>sanguinisch<br>gesellig, gesprächig,<br>lässig, lebhaft,<br>sorglos, tonangebend                          |

Seite 402, Abb. 48: Informationen über Motive und Charakterzüge  
(siehe auch Jung, H.: Persönlichkeitstypologie, 4. Aufl., München / Wien 2014, S. 100)



## 5. LOGISTISCHE FRAGEN

5.1 TRANSPORTWESEN

5.2 LAGERWESEN

5.3 ABFALLWIRTSCHAFT

## KAPITEL D: MATERIALWIRTSCHAFT

### 5. LOGISTISCHE FRAGEN

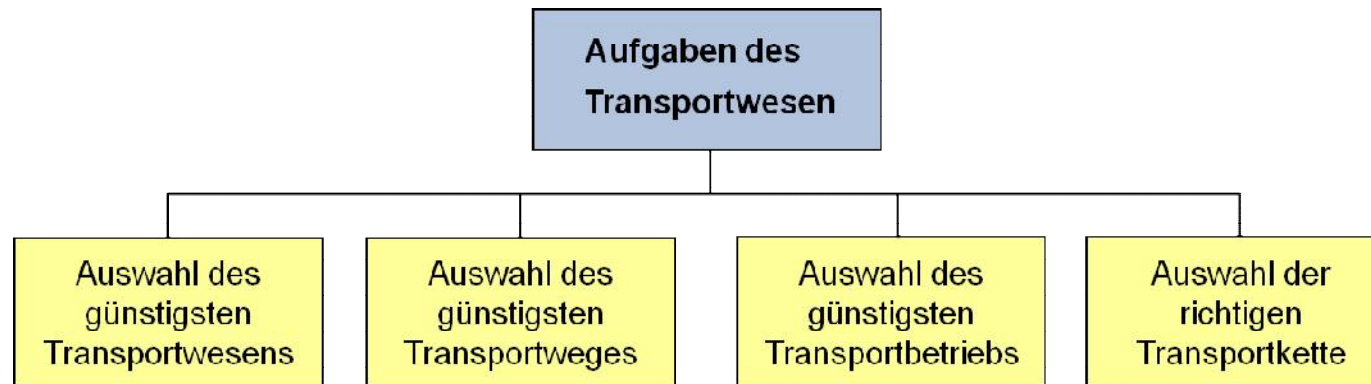

Seite 405, Abb. 49: Aufgaben des Transportwesens

## KAPITEL D: MATERIALWIRTSCHAFT

### 5. LOGISTISCHE FRAGEN

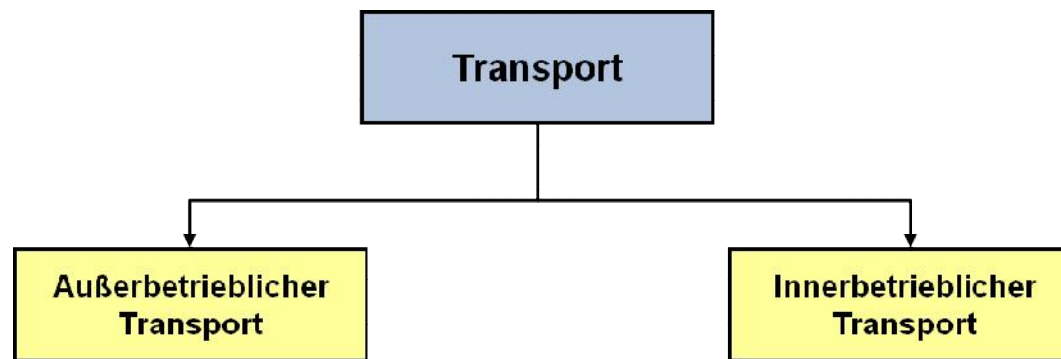

Seite 405, Abb. 50: Teilsysteme des Transportwesens

## KAPITEL D: MATERIALWIRTSCHAFT

### 5. LOGISTISCHE FRAGEN

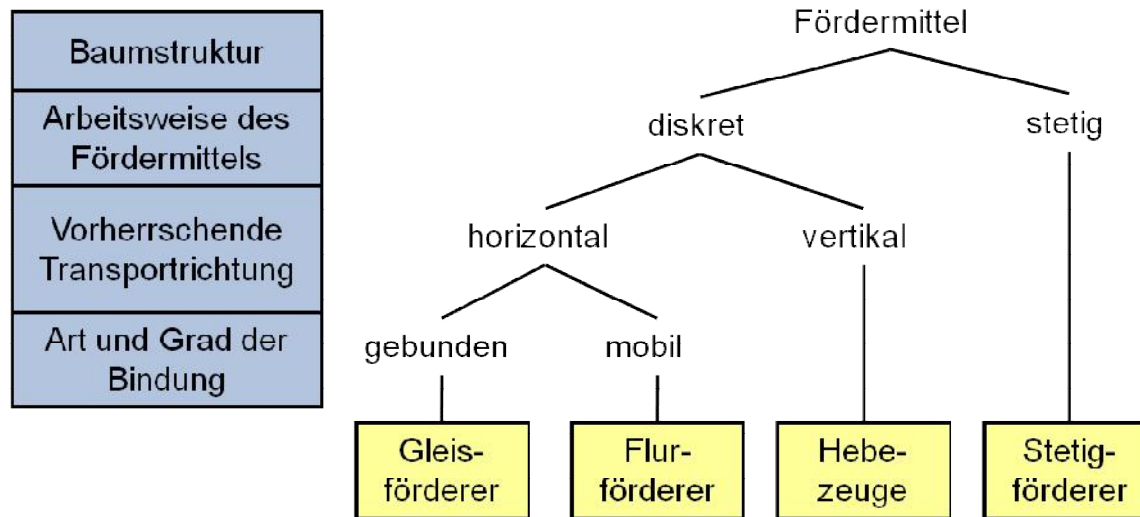

Seite 409, Abb. 51: Gliederung der Transportmittel nach Bauformen

## KAPITEL D: MATERIALWIRTSCHAFT

### 5. LOGISTISCHE FRAGEN

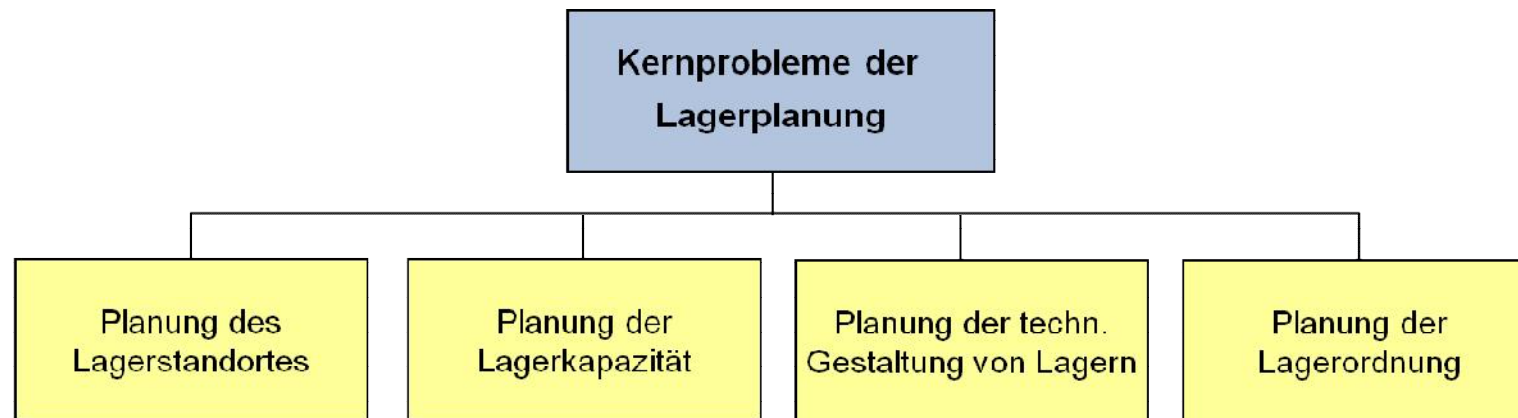

Seite 412, Abb. 52: Lagerplanung

## KAPITEL D: MATERIALWIRTSCHAFT

### 5. LOGISTISCHE FRAGEN

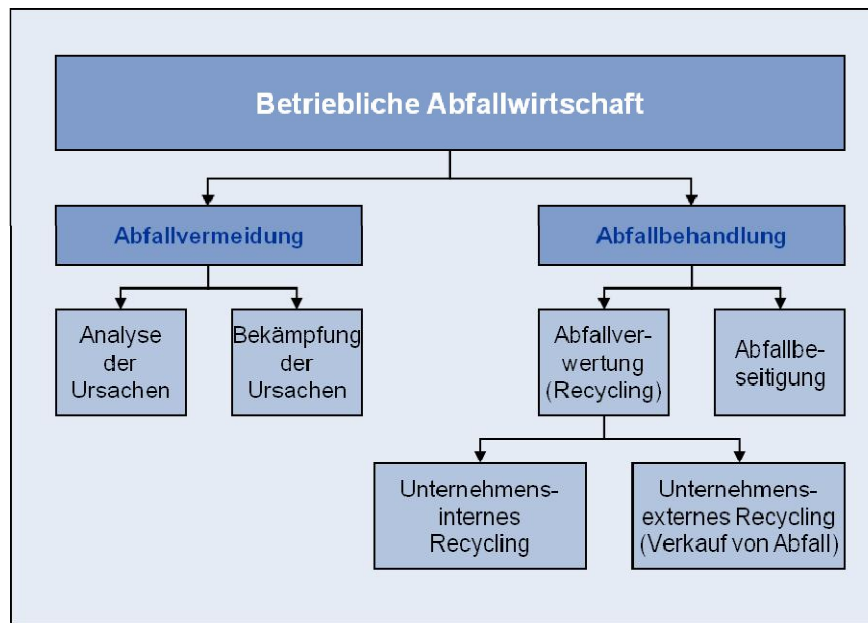

Seite 418, Abb. 53: Aufgaben der betrieblichen Abfallwirtschaft  
(Vgl. Arnolds, H./ Heege, F./ Röh, C./ Tussing, W.: Materialwirtschaft und Einkauf, 11. Aufl., Wiesbaden 2010, S. 315)

## KAPITEL D: MATERIALWIRTSCHAFT

### 5. LOGISTISCHE FRAGEN

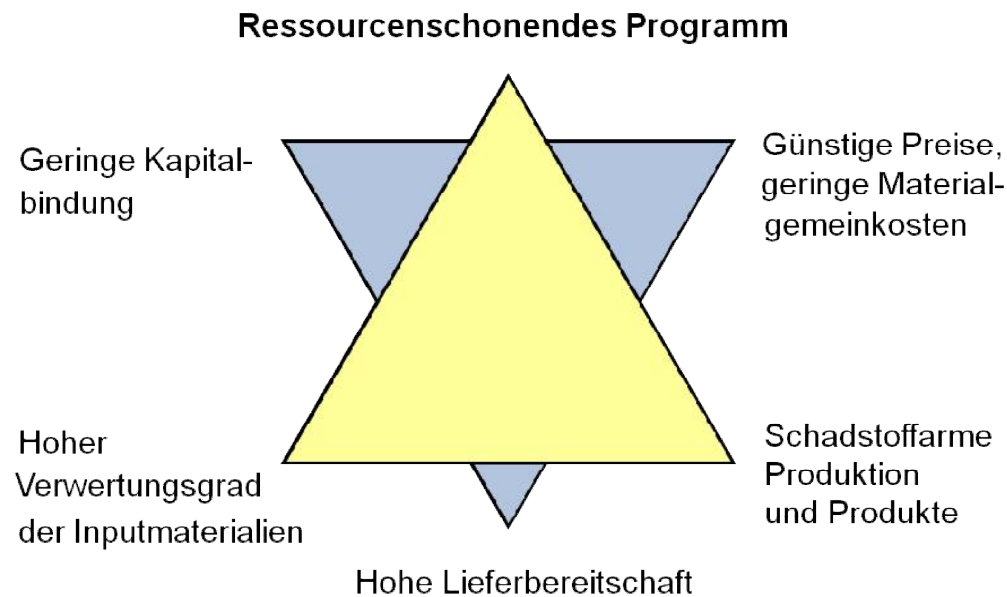

Seite 419, Abb. 54: Die Überdeckung des magischen Dreiecks der Materialwirtschaft durch das ökologische Dreieck

(Vgl. Eschenbach, R.: Erfolgspotential Materialwirtschaft, München / Wien 1990, S. 271)

*Jung: Allgemeine Betriebswirtschaftslehre. De Gruyter Oldenbourg 2016. ISBN 978-3-486-76376-8*

## KAPITEL D: MATERIALWIRTSCHAFT

### 5. LOGISTISCHE FRAGEN

| Abfall                                                                                                                                                                                                                                                                                 |                                                                                                                                                                                                                                                                                                                                                             |
|----------------------------------------------------------------------------------------------------------------------------------------------------------------------------------------------------------------------------------------------------------------------------------------|-------------------------------------------------------------------------------------------------------------------------------------------------------------------------------------------------------------------------------------------------------------------------------------------------------------------------------------------------------------|
| Ursachen                                                                                                                                                                                                                                                                               | Vermeidungsmaßnahmen                                                                                                                                                                                                                                                                                                                                        |
| Materialabfall                                                                                                                                                                                                                                                                         | Materialabfall                                                                                                                                                                                                                                                                                                                                              |
| <ul style="list-style-type: none"> <li>• Art des Fertigungsprozesses</li> <li>• Qualität der Einsatzstoffe</li> <li>• Arbeitsgänge wie Stanzen, Fräsen, Sägen oder Hobeln führen zwangsläufig zu bestimmten Reststoffen in Form von Sägemehl, Abfallholz, Metallspänen etc.</li> </ul> | <ul style="list-style-type: none"> <li>• Konsequente Änderung des Fertigungsverfahrens</li> <li>• Einsatz eines anderen Werkstoffes (z.B. Kunststoff statt Blech bei der Herstellung von Gehäusen)</li> <li>• bessere Ausnutzung der Einsatzstoffe durch konstruktive Veränderungen der eingesetzten Werkstoffe und/ oder des Fertigerzeugnisses</li> </ul> |

Seite 420, Abb. 55 (Teil 1): Ursachen und Vermeidungsmaßnahmen der einzelnen Abfallkategorien



## KAPITEL D: MATERIALWIRTSCHAFT

### 5. LOGISTISCHE FRAGEN

| Fertigungsausschuss                                                                                                                                                                                                                                                                                                                                                | Fertigungsausschuss                                                                                                                                                                                                                                                                                                                                                                                                           |
|--------------------------------------------------------------------------------------------------------------------------------------------------------------------------------------------------------------------------------------------------------------------------------------------------------------------------------------------------------------------|-------------------------------------------------------------------------------------------------------------------------------------------------------------------------------------------------------------------------------------------------------------------------------------------------------------------------------------------------------------------------------------------------------------------------------|
| <ul style="list-style-type: none"> <li>• Einsatz defekter, mangelhaft gepflegter oder veralteter Produktionsanlagen</li> <li>• Ungeeignetes oder falsches Material</li> <li>• Falsches Einrichten der Maschinen</li> <li>• Unsachgemäße Lagerung von Halb- und Fertigerzeugnissen</li> <li>• Menschliches Versagen in Produktion und Konstruktion</li> </ul>       | <ul style="list-style-type: none"> <li>• Umgestaltung von Fertigprodukten</li> <li>• Abändern bzw. ersetzen von Produktionsanlagen oder Materialien</li> <li>• Verbesserung der Qualitätssicherung</li> <li>• Schulung und Motivation der Mitarbeiter</li> <li>• Einführung von Qualitätszirkeln oder Abfallersparnisprämien</li> <li>• Permanente und zeitnahe Überwachung der Entstehung von Fertigungsausschuss</li> </ul> |
| Lagerhüter                                                                                                                                                                                                                                                                                                                                                         | Lagerhüter                                                                                                                                                                                                                                                                                                                                                                                                                    |
| <ul style="list-style-type: none"> <li>• Mangelhafte Planung und falsche Disposition in quantitativer und qualitativer Hinsicht</li> <li>• Änderungen des Produktionsprogramms</li> <li>• Unsachgemäße Lagerung oder Beförderung</li> <li>• Konstruktions- oder Stücklistenänderungen</li> <li>• Stilllegung von Anlagen</li> <li>• Zu lange Lagerdauer</li> </ul> | <ul style="list-style-type: none"> <li>• Einsatz der programmgesteuerten Disposition</li> <li>• Engere Zusammenarbeit zwischen Absatz, Produktion, Entwicklung und Einkauf</li> <li>• Verstärkter Einsatz von Normteilen</li> <li>• Lagerloser Einkauf</li> <li>• Verbesserung der Lagerungsmöglichkeiten und des Schutzes der Lagerhüter</li> </ul>                                                                          |

Seite 420, Abb. 55 (Teil 2): Ursachen und Vermeidungsmaßnahmen der einzelnen Abfallkategorien

## KAPITEL D: MATERIALWIRTSCHAFT

### 5. LOGISTISCHE FRAGEN

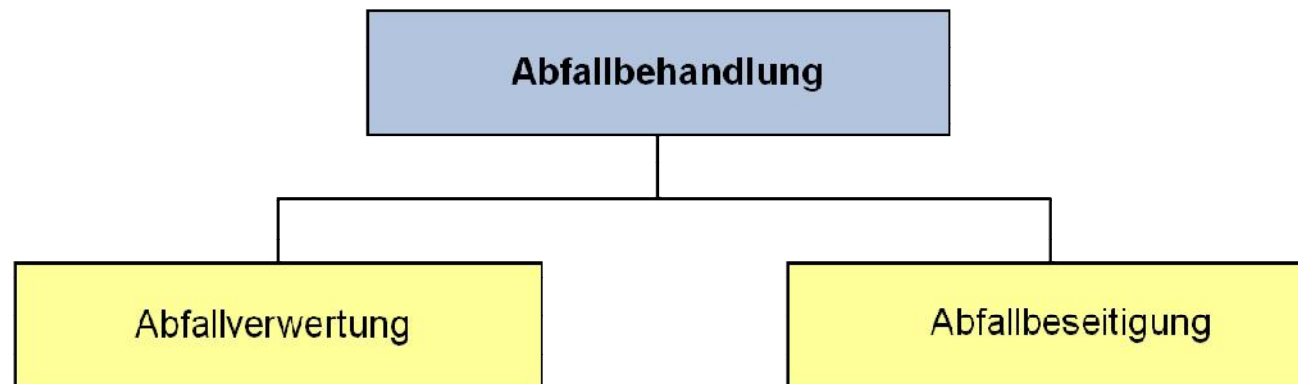

Seite 421, Abb. 56: Abfallbehandlung
