# Supplementary material
Source: publisher site journal article supplement (https://www.degruyterbrill.com/publication/isbn/9783486989434/downloadAsset/9783486989434_Folien--de.zip)
Supplement: Supplementary file 5 [file Teil_E_ABWL.pdf › Teil_E_ABWL.pdf]

# ZUSATZMATERIALIEN ALLGEMEINE BETRIEBSWIRTSCHAFTSLEHRE

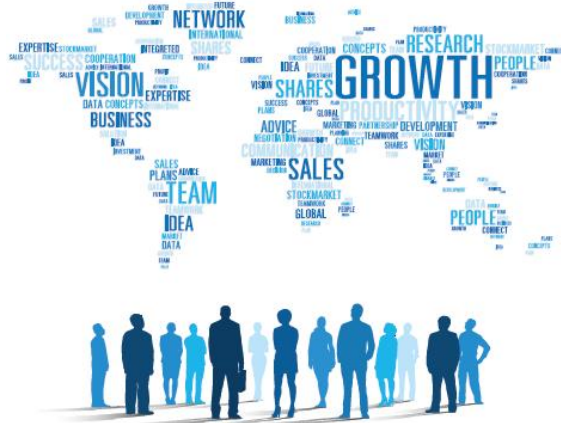

## KAPITEL E: PRODUKTIONSWIRTSCHAFT

1. GRUNDLAGEN
2. PRODUKTIONS- UND KOSTENTHEORIE
3. PRODUKTIONSPLANUNG
4. PROZESSGESTALTUNG
5. INTEGRATIVE PLANUNG UND STEUERUNG DES PRODUKTIONSABLAUFS
6. DIE PRODUKTION ALS WETTBEWERBSFAKTOR

# 1. GRUNDLAGEN

1.1 BEGRIFF UND WESEN DER PRODUKTION

1.2 DAS PRODUKTIONSSYSTEM

1.3 TYPOLOGIE VON PRODUKTIONSSYSTEMEN

1.4 DAS ZIELSYSTEM DER PRODUKTION

## KAPITEL E: PRODUKTIONSWIRTSCHAFT

### 1. GRUNDLAGEN

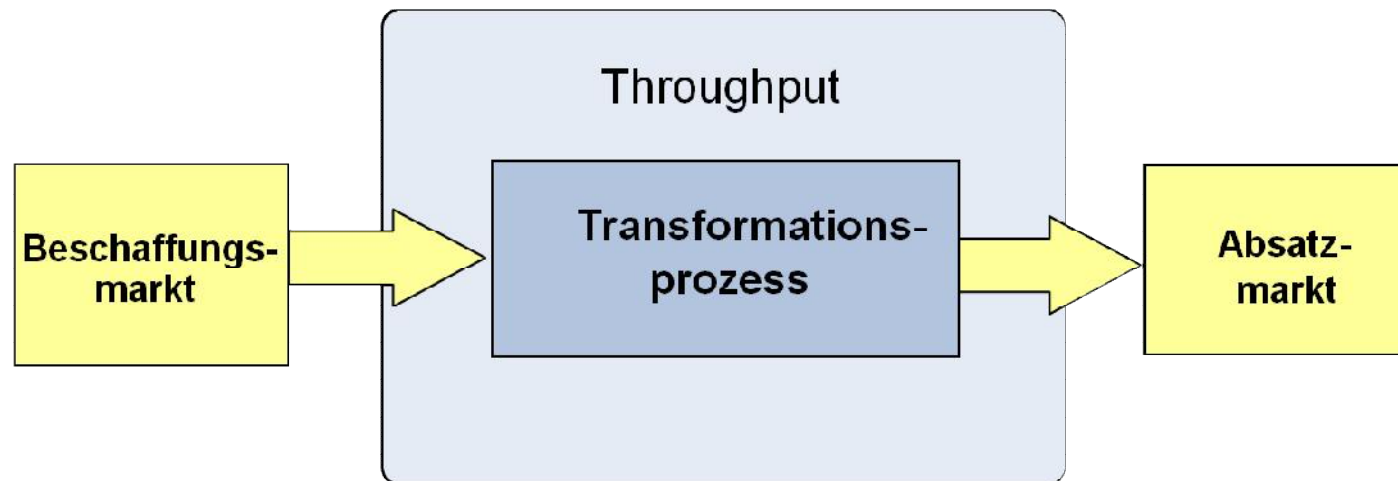

Seite 431, Abb. 1: Darstellung des produktiven Systems

## KAPITEL E: PRODUKTIONSWIRTSCHAFT

### 1. GRUNDLAGEN

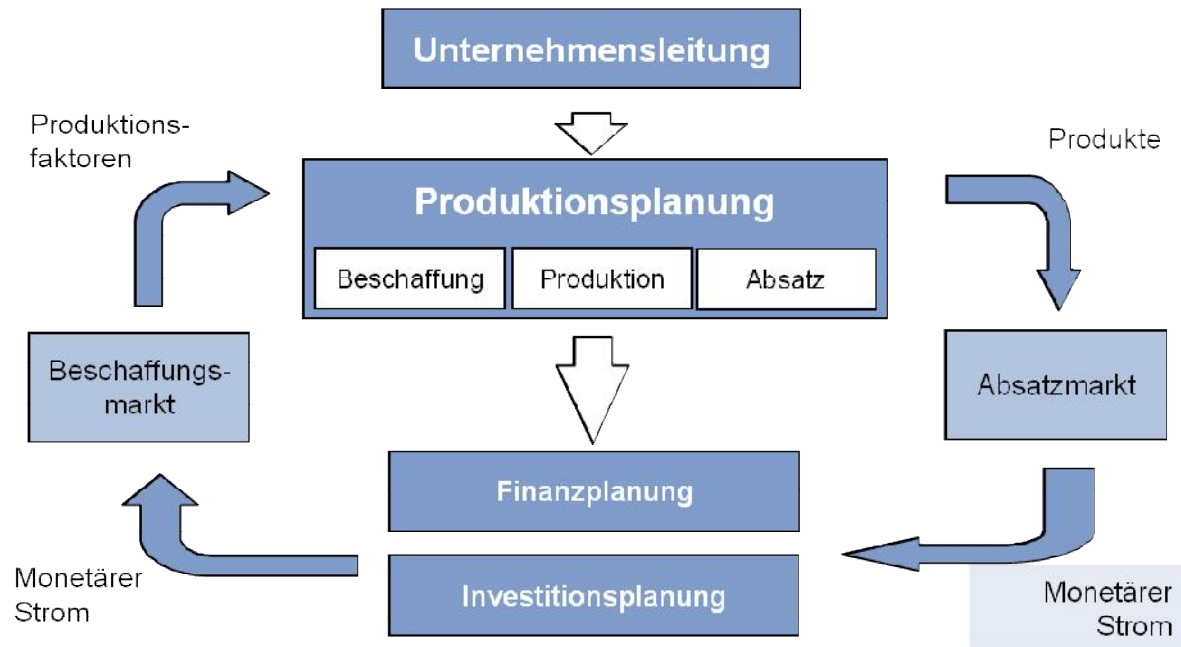

Seite 432, Abb. 2: Produktion als Grundelement des betrieblichen Kreislaufes

## KAPITEL E: PRODUKTIONSWIRTSCHAFT

### 1. GRUNDLAGEN

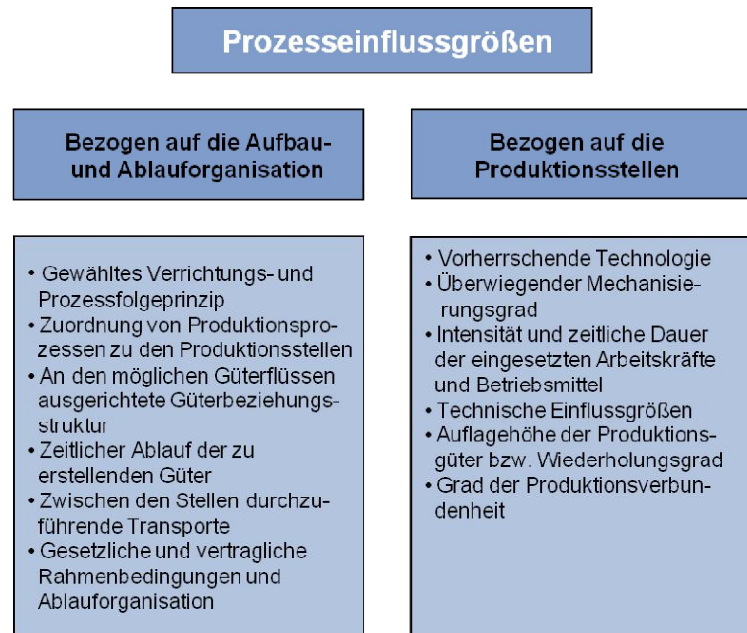

Seite 436, Abb. 4: Einflussgrößen auf den Produktionsprozess

# KAPITEL E: PRODUKTIONSWIRTSCHAFT

## 1. GRUNDLAGEN

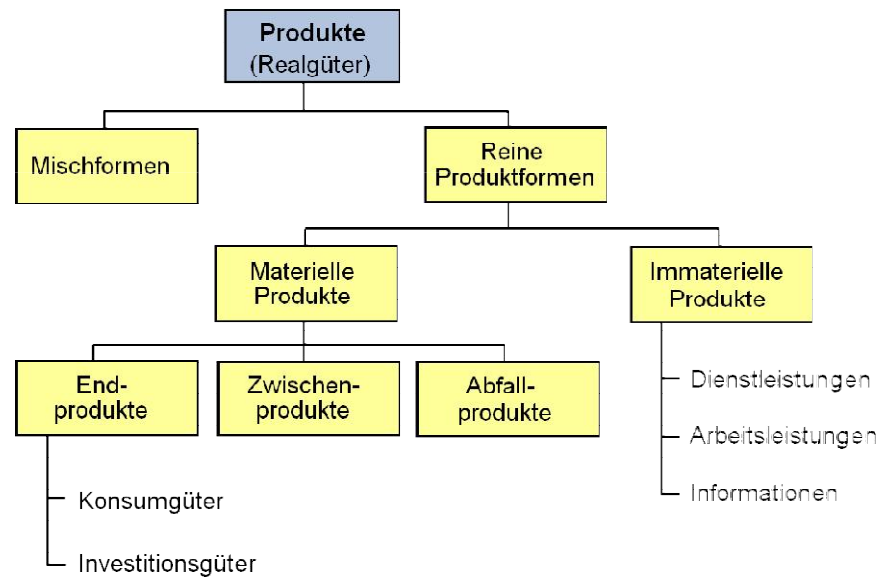

Seite 436, Abb. 4: Das Produktsystem

# KAPITEL E: PRODUKTIONSWIRTSCHAFT

## 1. GRUNDLAGEN

| Merkmale von Elementartypen                            | Merkmalsausprägungen von Elementartypen                       |                                        |                                              |
|--------------------------------------------------------|---------------------------------------------------------------|----------------------------------------|----------------------------------------------|
| A. Produktbezogene Merkmale                            |                                                               |                                        |                                              |
| Zahl der angebotenen und produzierten Produkteinheiten | Einproduktproduktion                                          | Mehrproduktproduktion                  |                                              |
| Abnehmereinflüsse auf Produktgestaltg.                 | unmittelbare kundenorientierte Produktion                     | mittelbar kundenorientierte Produktion |                                              |
| B. Prozessbezogene Merkmale                            |                                                               |                                        |                                              |
| a) Stufigkeit                                          | einstufig                                                     | mehrstufig                             |                                              |
| b) Prozesswiederholung                                 | Einzelproduktion                                              | Sorten /Sortenproduktion               | Fließproduktion                              |
| c) Anordnung der Produktionseinricht./ Arbeitssysteme  | Werkstattproduktion                                           | Zentrenproduktion                      | Fließproduktion                              |
| d) Zeitliche Abstimmung                                | global abgestimmte Arbeitsfolgen                              | teilabgestimmte Arbeitsfolgen          | fein abgestimmte bzw. getaktete Arbeitsfolg. |
| e) Zeitliche Prozessanordnung                          | Wechselproduktion (Sukzessivproduktion)                       | Parallelproduktion                     |                                              |
| f) Kontinuität des Materialflusses                     | technologisch diskontinuierliche Prozesse (Chargenproduktion) | technologisch kontinuierliche Prozesse |                                              |

Seite 437, Abb. 5 (Teil 1): Überblick über die wichtigsten Elementartypen als Grundlage zur Bildung von Misch- bzw. Kombinationstypen  
(Vgl. Hahn, D. / Laßmann, G.: Produktionswirtschaft: Controlling industrieller Produkte, 2.Aufl., Heidelberg, 1990, S. 36)

Jung: Allgemeine Betriebswirtschaftslehre. De Gruyter Oldenbourg 2016. ISBN 978-3-486-76376-8



# KAPITEL E: PRODUKTIONSWIRTSCHAFT

## 1. GRUNDLAGEN

|                                                          |                                                                                     |                              |                                  |                                                                                    |
|----------------------------------------------------------|-------------------------------------------------------------------------------------|------------------------------|----------------------------------|------------------------------------------------------------------------------------|
| Verbundenheit der Produktion                             | unverbundene Produktion                                                             |                              |                                  | verbundene/gekuppelte Produktion                                                   |
| Entwicklungstiefe der Produktion                         | manuelle Produktion                                                                 | maschinelle Produktion       | teilautomatisierte Produktion    | vollautomatisierte Produktion                                                      |
| Prozesseinwirkung auf Einsatzstoffe                      | analytische Prozesse                                                                | synthetische Prozesse        | analytisch-synthetische Prozesse | stoffneutrale Prozesse                                                             |
| Prozesstechnologie                                       | physikalische                                                                       | chemische                    | kernphysikalische                | biologische                                                                        |
| Beherrschbarkeit der Prozesse                            | vollständig beherrschbare Produktion                                                |                              |                                  | nicht vollständig beherrschbare Produktion                                         |
| <b>C. Faktorbezogene Merkmale</b>                        |                                                                                     |                              |                                  |                                                                                    |
| a) Ortsgebundenheit der Produktionsfaktoren              | ortsgebundene Produktionsfaktoren (anlagengebundene Produktion und Abbauproduktion) |                              |                                  | ortsgebundene Produktionsfaktoren aber ortsgebundene Produkte (Baustellenprodukte) |
| b) Wirtschaftliches Gewicht der Faktorenart              | arbeitsintensive Produktion                                                         | materialintensive Produktion |                                  | anlagenintensive Produktion                                                        |
| c) Wiederholbarkeit der Erzeugniseinsatzstoffbeschaffung | Einmaligkeit der Stoffbeschaffung (Partieproduktion)                                | begrenzte Wiederholbarkeit   |                                  | unbegrenzte Wiederholbarkeit (Normstoffe)                                          |

Seite 437, Abb. 5 (Teil 2): Überblick über die wichtigsten Elementartypen als Grundlage zur Bildung von Misch- bzw. Kombinationstypen  
(Vgl. Hahn, D. / Laßmann, G.: Produktionswirtschaft, Controlling industrieller Produkte, 2.Aufl., Heidelberg, 1990, S. 36)

Jung: Allgemeine Betriebswirtschaftslehre. De Gruyter Oldenbourg 2016. ISBN 978-3-486-76376-8

# KAPITEL E: PRODUKTIONSWIRTSCHAFT

## 1. GRUNDLAGEN

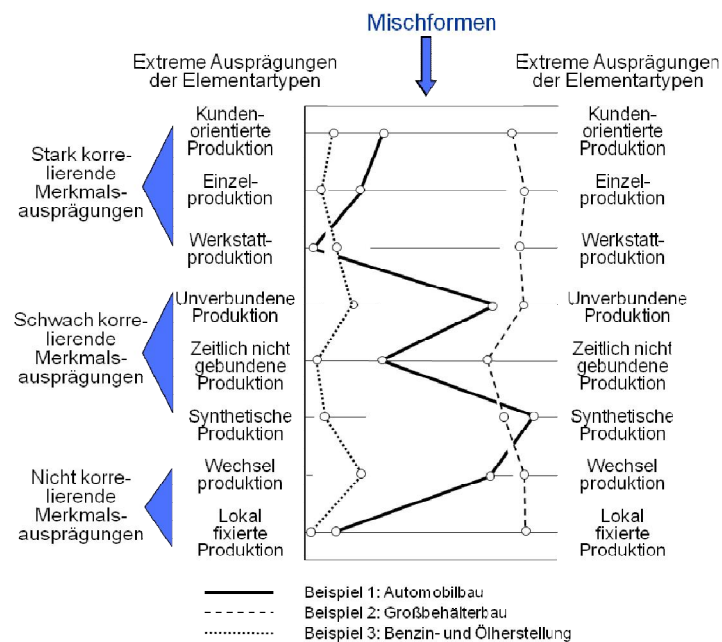

Seite 438, Abb. 6: Reale Produktionstypen

# KAPITEL E: PRODUKTIONSWIRTSCHAFT

## 1. GRUNDLAGEN

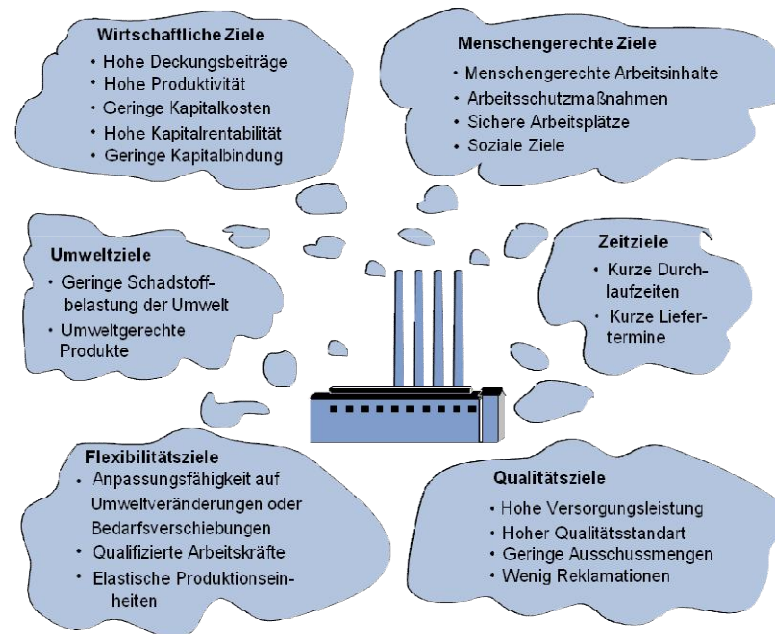

Seite 439, Abb. 7: Auswahl möglicher Zielfelder der Produktion  
(in Anlehnung an Kern, W.: Industrielle Produktionswirtschaft, 5. Aufl., Stuttgart 1992, S.61)

## 2. PRODUKTIONS- UND KOSTENTHEORIE

2.1 GRUNDLAGEN DER PRODUKTIONS- UND KOSTENTHEORIE

2.2 PRODUKTIONSFUNKTION VOM TYP A

2.3 PRODUKTIONSFUNKTION VOM TYP B

2.4 WEITERE BETRIEBSWIRTSCHAFTLICHE PRODUKTIONSFUNKTIONEN

## KAPITEL E: PRODUKTIONSWIRTSCHAFT

### 2. PRODUKTIONS- UND KOSTENTHEORIE

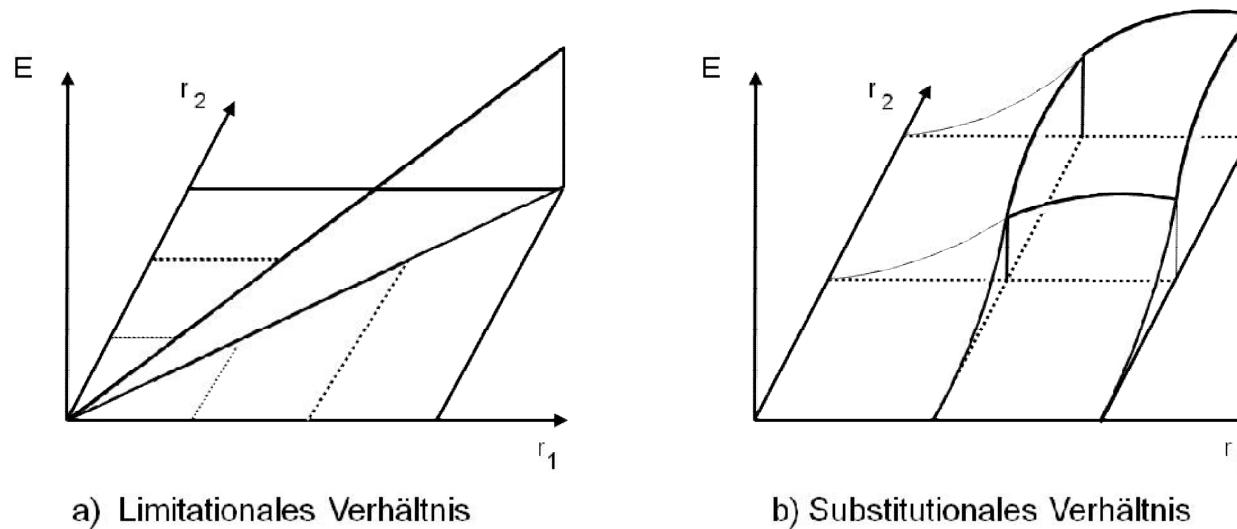

Seite 441, Abb. 8: Ertragsgebirge limitationaler und substitutionaler Produktionsverfahren

## KAPITEL E: PRODUKTIONSWIRTSCHAFT

### 2. PRODUKTIONS- UND KOSTENTHEORIE

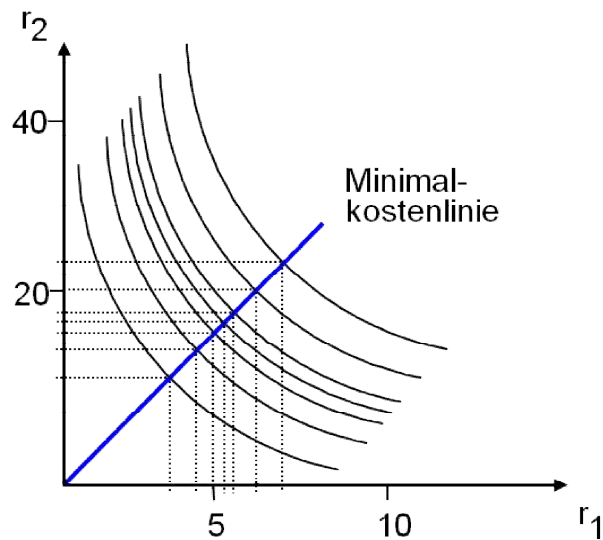

Seite 442, Abb. 9: Indifferenzkurven

## KAPITEL E: PRODUKTIONSWIRTSCHAFT

### 2. PRODUKTIONS- UND KOSTENTHEORIE

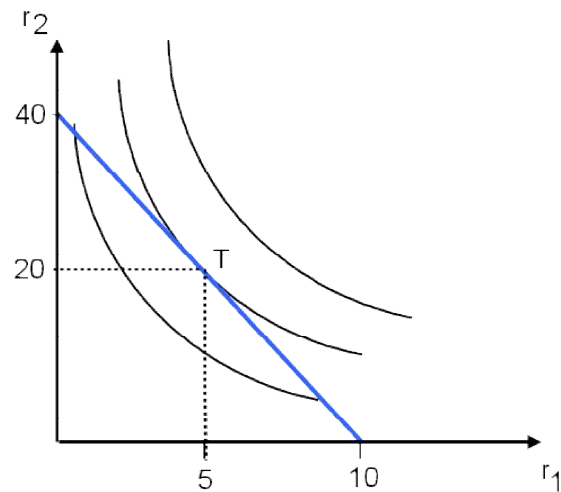

Seite 443, Abb. 10: Minimalkostenkombination

## KAPITEL E: PRODUKTIONSWIRTSCHAFT

### 2. PRODUKTIONS- UND KOSTENTHEORIE

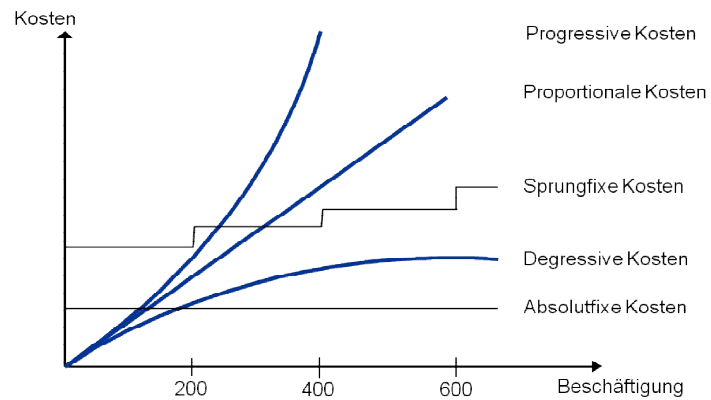

| Menge<br>x | Fixe Kosten |                 | Sprungfixe Kosten |                 | Proportionale Kosten |                 | Progressive Kosten |                 | Degressive Kosten |                 |
|------------|-------------|-----------------|-------------------|-----------------|----------------------|-----------------|--------------------|-----------------|-------------------|-----------------|
|            | $K_f$       | $\frac{K_f}{x}$ | $K_f$             | $\frac{K_f}{x}$ | $K_v$                | $\frac{K_v}{x}$ | $K_v$              | $\frac{K_v}{x}$ | $K_v$             | $\frac{K_v}{x}$ |
| 200        | 10.000      | 50,00           | 4.000             | 20              | 1.000                | 5               | 1.000              | 5,00            | 1.000             | 5,00            |
| 400        | 10.000      | 25,00           | 8.000             | 20              | 2.000                | 5               | 2.200              | 5,50            | 1.600             | 4,00            |
| 600        | 10.000      | 16,67           | 12.000            | 20              | 3.000                | 5               | 3.900              | 6,50            | 2.100             | 3,50            |
| 800        | 10.000      | 12,50           | 16.000            | 20              | 4.000                | 5               | 6.400              | 8,00            | 2.600             | 3,25            |
| 1.000      | 10.000      | 10,00           | 20.000            | 20              | 5.000                | 5               | 10.000             | 10,00           | 3.100             | 3,10            |

Seite 445, Abb. 11: Kostenarten



## KAPITEL E: PRODUKTIONSWIRTSCHAFT

### 2. PRODUKTIONS- UND KOSTENTHEORIE

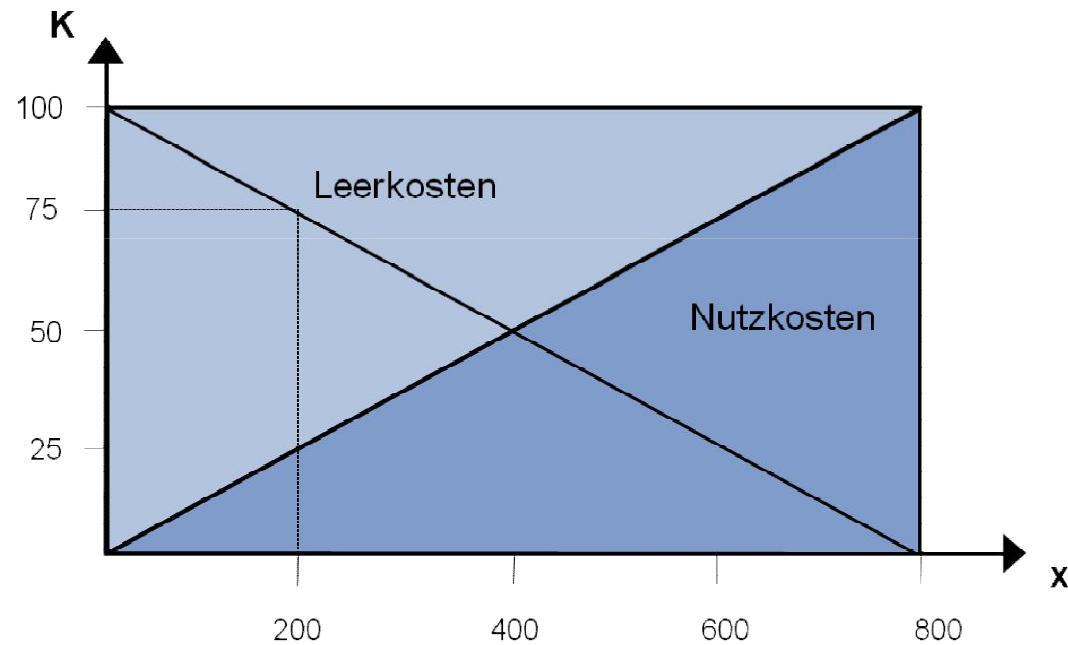

Seite 446, Abb. 12: Nutz- und Leerkostenverteilung

## KAPITEL E: PRODUKTIONSWIRTSCHAFT

### 2. PRODUKTIONS- UND KOSTENTHEORIE

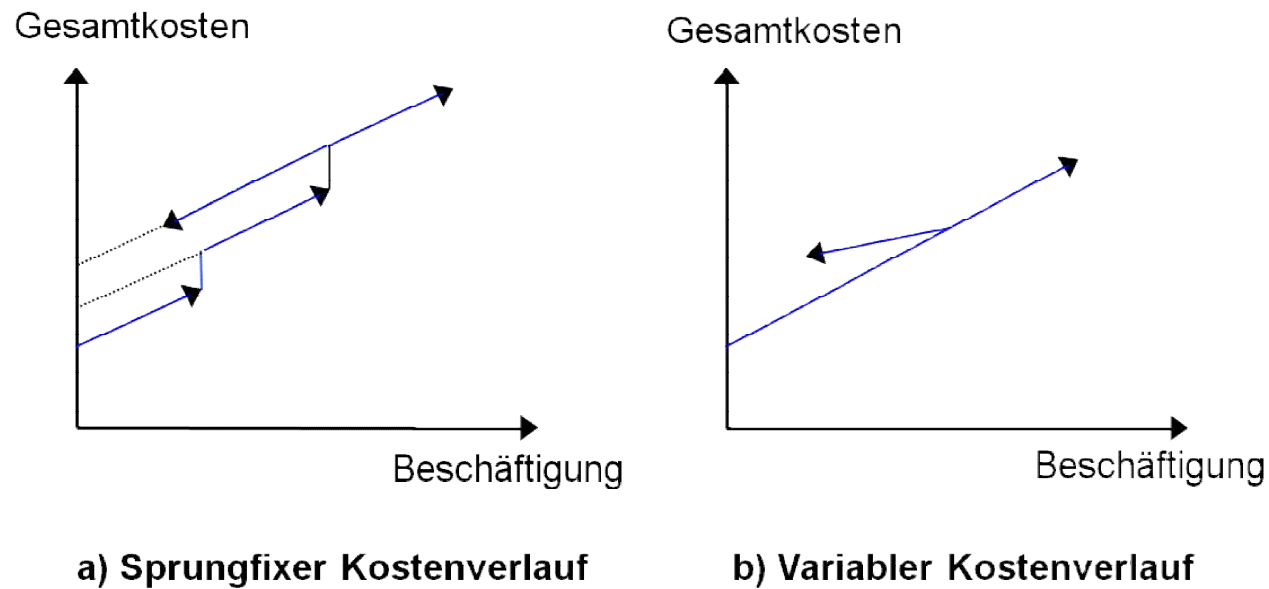

Seite 447, Abb. 13: Kostenremanenz bei sprungfixem und variablem Kostenverlauf

## KAPITEL E: PRODUKTIONSWIRTSCHAFT

### 2. PRODUKTIONS- UND KOSTENTHEORIE

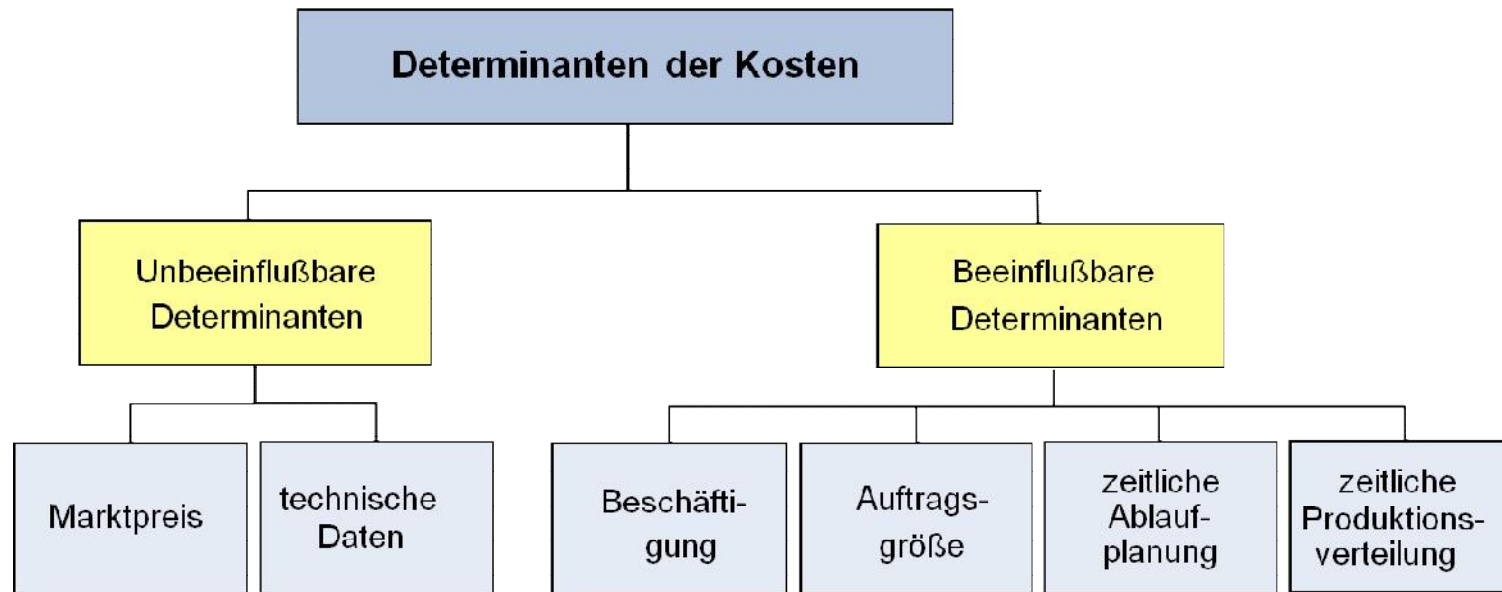

Seite 448, Abb. 14: Kosteneinflussgrößen

## KAPITEL E: PRODUKTIONSWIRTSCHAFT

### 2. PRODUKTIONS- UND KOSTENTHEORIE

#### Gesamtertragskurve

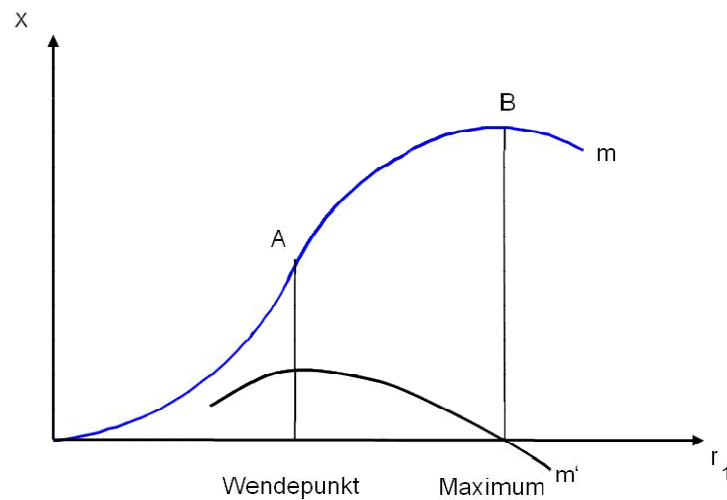

Seite 449, Abb. 15: Gesamtertragskurve der Produktionsfunktion vom Typ A

## KAPITEL E: PRODUKTIONSWIRTSCHAFT

### 2. PRODUKTIONS- UND KOSTENTHEORIE

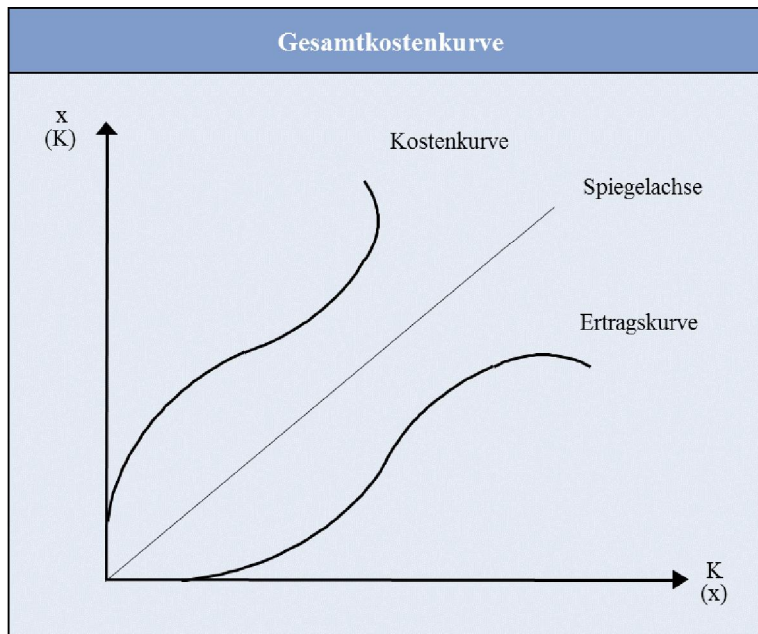

Seite 450, Abb. 16: Gesamtkostenkurve der Produktionsfunktion vom Typ A

## KAPITEL E: PRODUKTIONSWIRTSCHAFT

### 2. PRODUKTIONS- UND KOSTENTHEORIE

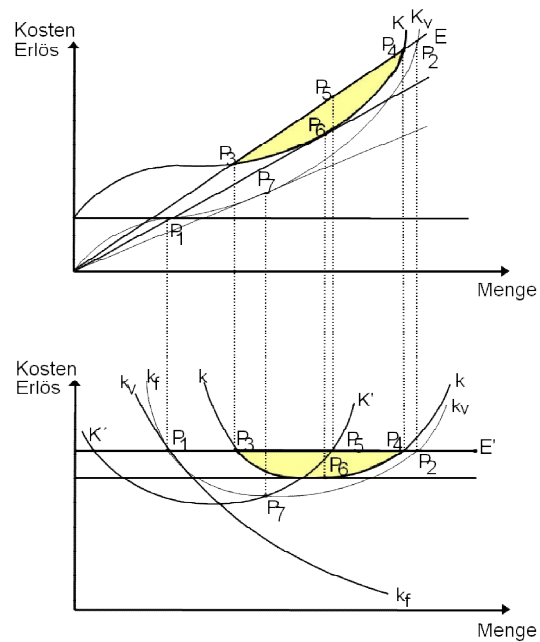

Seite 451, Abb. 17: Kostenkurven nach der Produktionsfunktion vom Typ A

# KAPITEL E: PRODUKTIONSWIRTSCHAFT

## 2. PRODUKTIONS- UND KOSTENTHEORIE

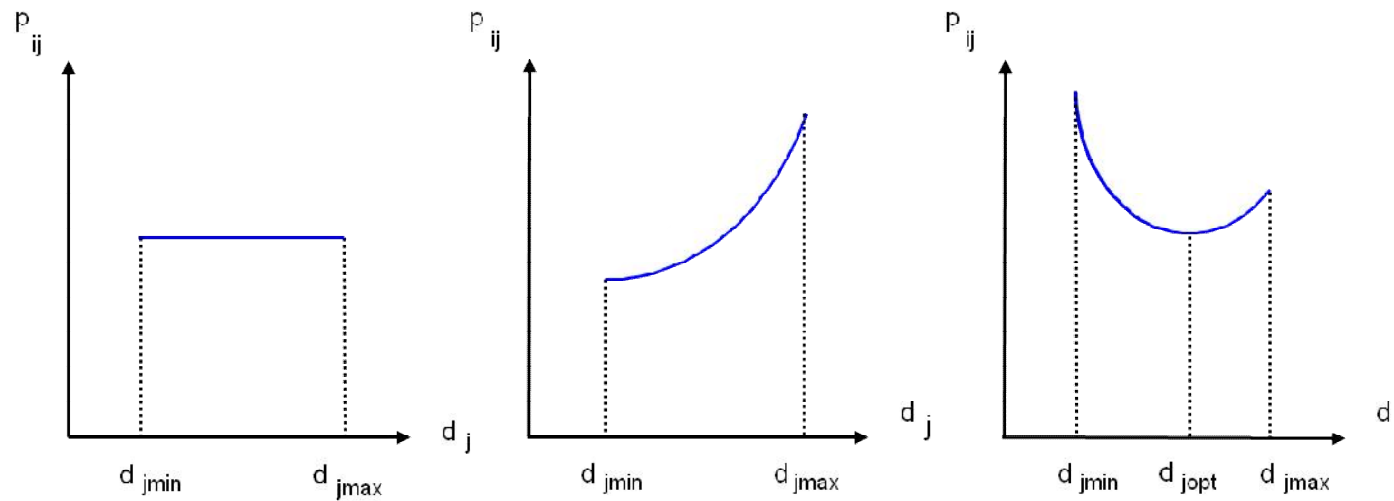

Seite 454, Abb. 18: Grundformen der Verbrauchsfunktionen

## KAPITEL E: PRODUKTIONSWIRTSCHAFT

### 2. PRODUKTIONS- UND KOSTENTHEORIE

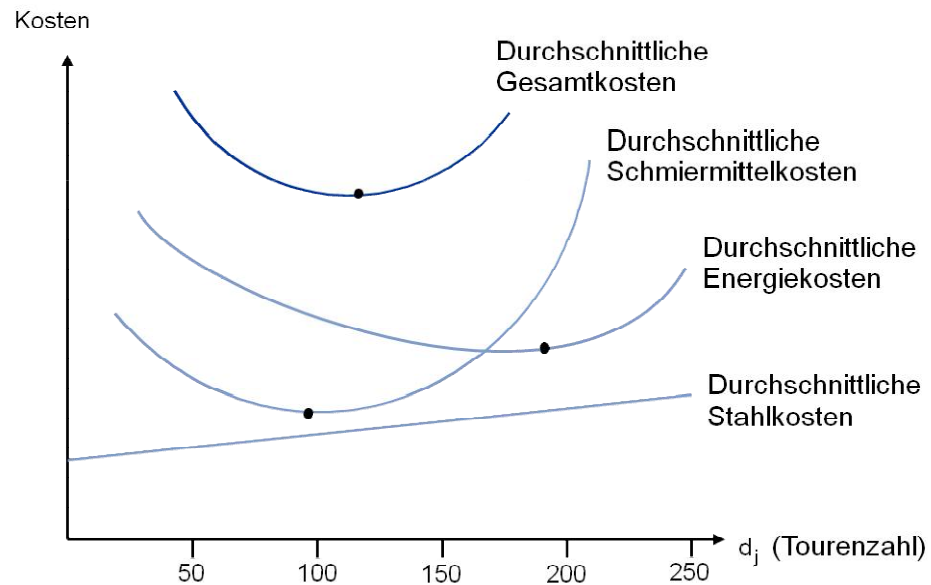

Seite 455, Abb. 19: Optimale Intensität



## KAPITEL E: PRODUKTIONSWIRTSCHAFT

### 2. PRODUKTIONS- UND KOSTENTHEORIE

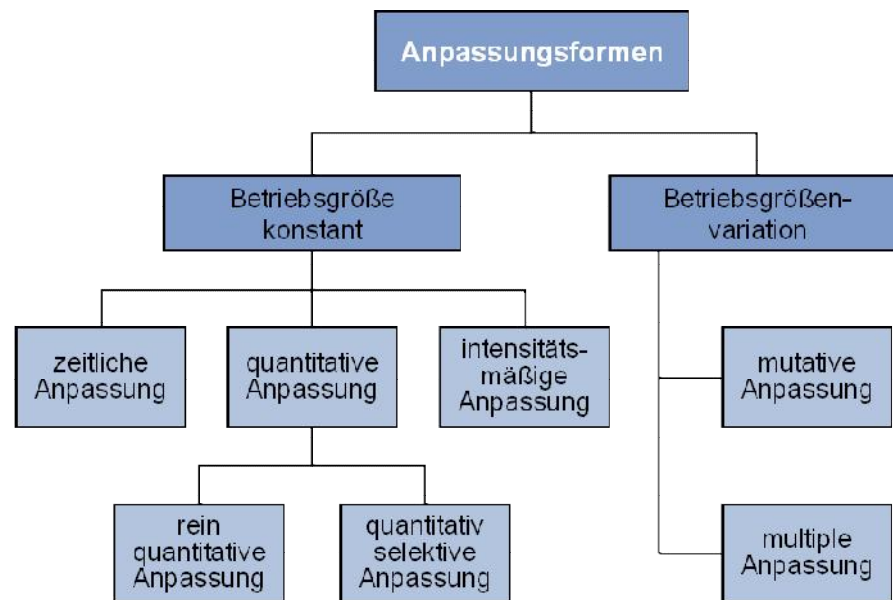

Seite 456, Abb. 20: Anpassungsformen an Beschäftigungsschwankungen

## KAPITEL E: PRODUKTIONSWIRTSCHAFT

### 2. PRODUKTIONS- UND KOSTENTHEORIE

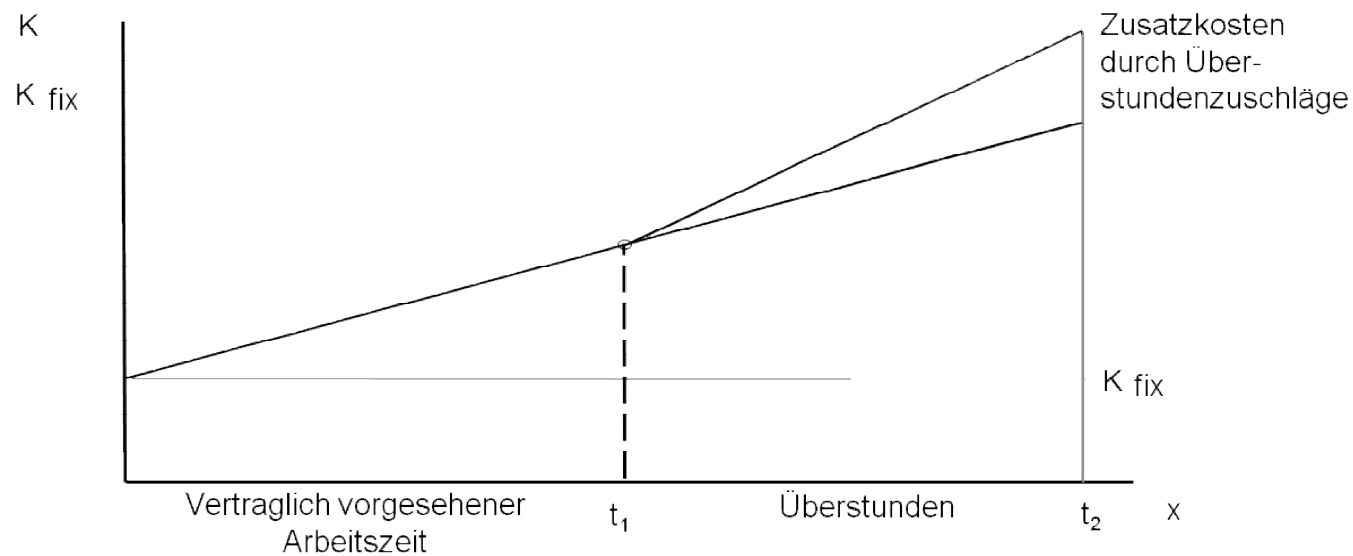

Seite 457, Abb. 21: Zeitliche Anpassung

## KAPITEL E: PRODUKTIONSWIRTSCHAFT

### 2. PRODUKTIONS- UND KOSTENTHEORIE

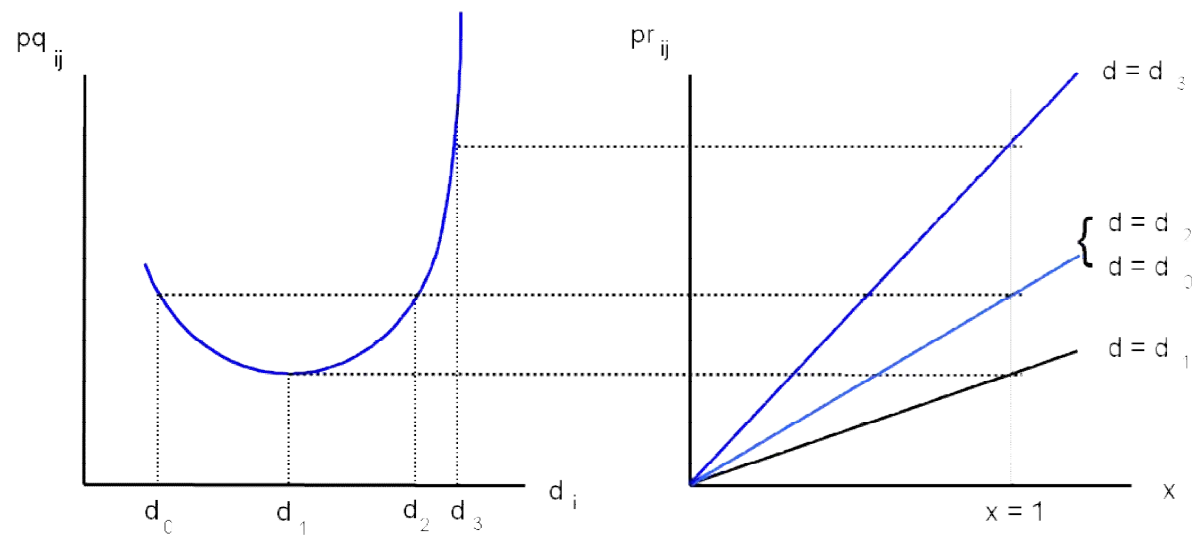

Seite 457, Abb. 22: Zusammenhang zwischen Durchschnittskosten und Faktorverbrauch

## KAPITEL E: PRODUKTIONSWIRTSCHAFT

### 2. PRODUKTIONS- UND KOSTENTHEORIE

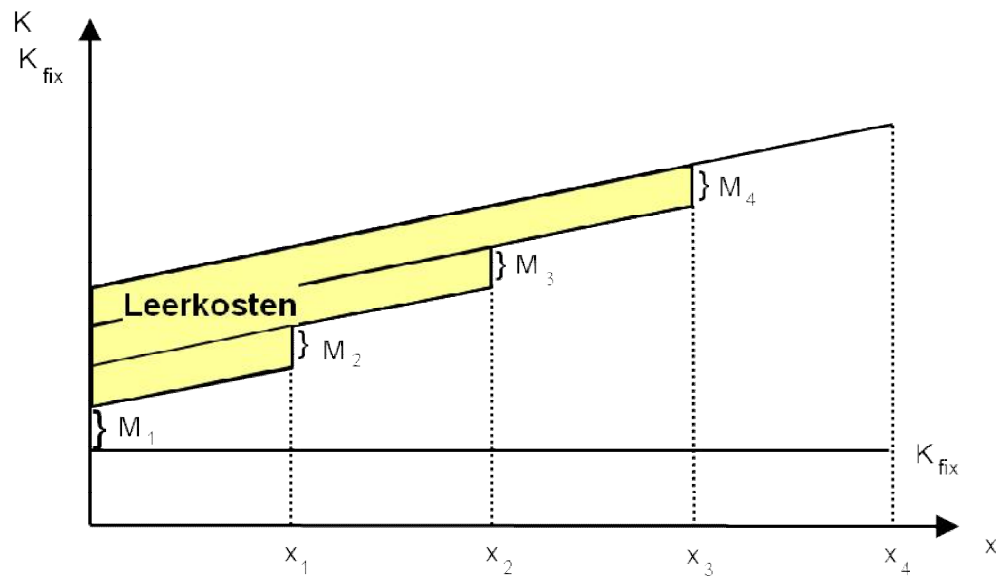

Seite 458, Abb. 23: Quantitative Anpassung gleichwertiger Produktionsanlagen

## KAPITEL E: PRODUKTIONSWIRTSCHAFT

### 2. PRODUKTIONS- UND KOSTENTHEORIE

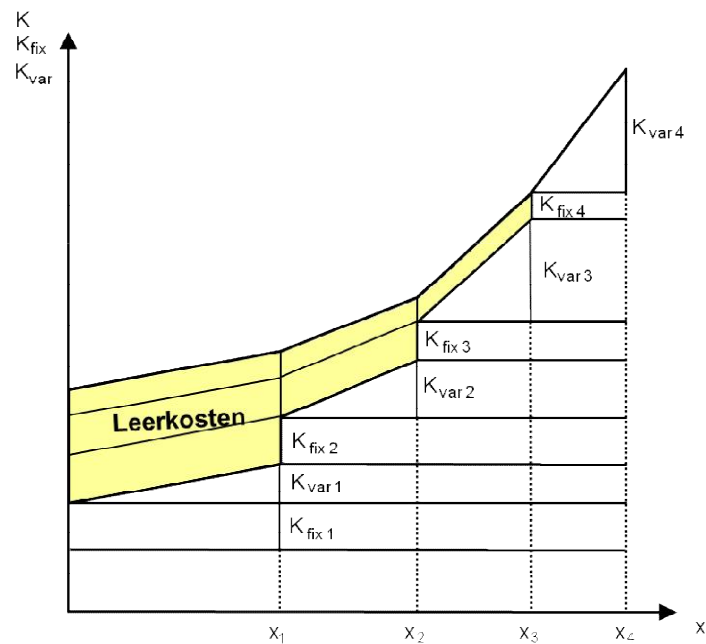

Seite 459, Abb. 24: Quantitativ-selektive Anpassung

## KAPITEL E: PRODUKTIONSWIRTSCHAFT

### 2. PRODUKTIONS- UND KOSTENTHEORIE

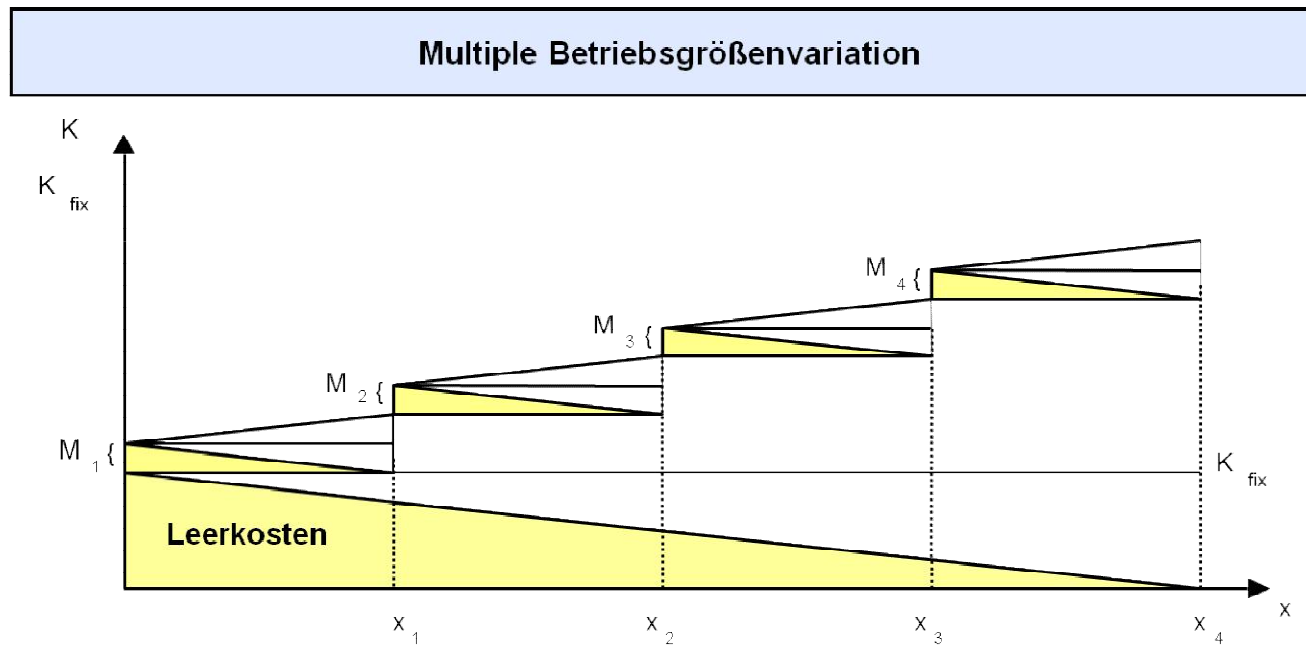

Seite 460, Abb. 25: Multiple Änderung des Produktionsfaktorbestandes

## KAPITEL E: PRODUKTIONSWIRTSCHAFT

### 2. PRODUKTIONS- UND KOSTENTHEORIE

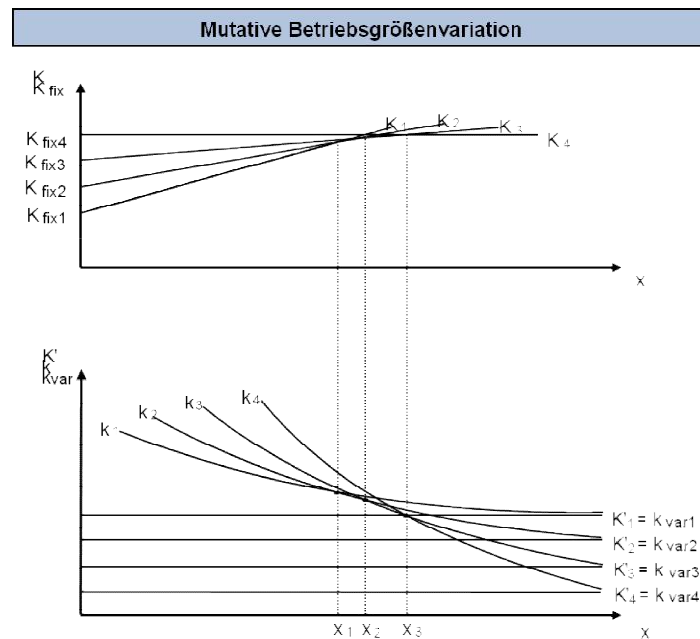

Seite 461, Abb. 26: Mutative Betriebsgrößenvariation  
(Vgl. Gutenberg, E.: Grundlagen der Betriebswirtschaftslehre, Bd. 1: Die Produktion, 24. Aufl.,  
Berlin / Heidelberg 1983, S. 434)

Jung: Allgemeine Betriebswirtschaftslehre. De Gruyter Oldenbourg 2016. ISBN 978-3-486-76376-8

## KAPITEL E: PRODUKTIONSWIRTSCHAFT

### 2. PRODUKTIONS- UND KOSTENTHEORIE

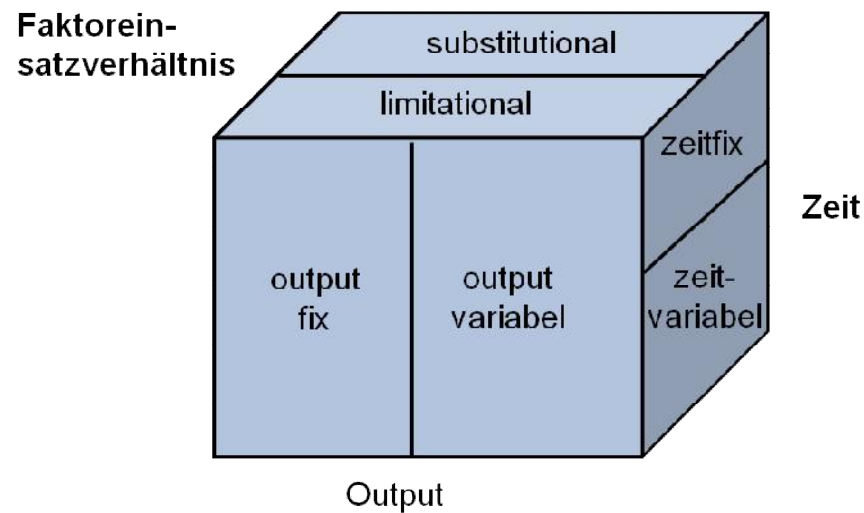

Seite 462, Abb. 27: Elementarkombinationen der Produktionsfunktion vom Typ C (Vgl. Heinen, E.: Industriebetriebslehre, 8.Aufl., Wiesbaden 1990, S. 166 ff)



# KAPITEL E: PRODUKTIONSWIRTSCHAFT

## 2. PRODUKTIONS- UND KOSTENTHEORIE

| Prod. Funktion                 | Typ A                  | Typ B                     | Typ C                                                              | Typ D                                                                                           | Typ E                | Typ F                 |
|--------------------------------|------------------------|---------------------------|--------------------------------------------------------------------|-------------------------------------------------------------------------------------------------|----------------------|-----------------------|
| Merkmale                       | Türgot, v. Thünen      | Guten-<br>berg            | Heinen                                                             | Klook                                                                                           | Küppers              | Matthes               |
| Anzahl Pro-<br>dukte           | Einprodukt-<br>betrieb | Mehrproduktbetrieb        |                                                                    |                                                                                                 |                      |                       |
| Technologi-<br>scher Prozess   | Einstufig              | Mehrstufig                |                                                                    | Mehrstufig, komplex                                                                             |                      |                       |
| Fertigungsart                  | Serienfertigung        |                           |                                                                    |                                                                                                 |                      | Einzel-<br>fertigung  |
| Art der Faktor-<br>kombination | Substitutional         | Limitational              | Substitutional und Limitational                                    |                                                                                                 |                      |                       |
| Betrachtungs-<br>gegenstand    | Ein<br>Aggregat        | Mehrere<br>Aggre-<br>gate | Mehrere<br>Aggregate,<br>Teilprozesse<br>Elementar-<br>kombination | Zusammenfassung aller Produkti-<br>onsbeziehungen (alle Aggregate,<br>Lager-, Wechselbeziehung) |                      |                       |
| Funktionsart                   | Ertragsfunktion        |                           |                                                                    |                                                                                                 |                      |                       |
|                                |                        | Verbrauchsfunktion        |                                                                    |                                                                                                 |                      |                       |
|                                |                        |                           | Belastungsfunktion                                                 |                                                                                                 |                      |                       |
|                                |                        |                           |                                                                    | Lagerfunktion                                                                                   |                      |                       |
|                                |                        |                           |                                                                    |                                                                                                 | Verknüpfungsfunktion |                       |
|                                |                        |                           |                                                                    |                                                                                                 |                      | Zahlungs-<br>funktion |

Seite 463, Abb. 28: Systematisierungsmerkmale der Produktionsfunktionen  
 (Vgl. Nebl, T.: Produktionswirtschaft, 6.Aufl., München 2007, S. 319)

## 3. PRODUKTIONSPLANUNG

### 3.1 PRODUKTIONSPROGRAMMPLANUNG

### 3.2 PRODUKTPLANUNG

## KAPITEL E: PRODUKTIONSWIRTSCHAFT

### 3. PRODUKTIONSPLANUNG

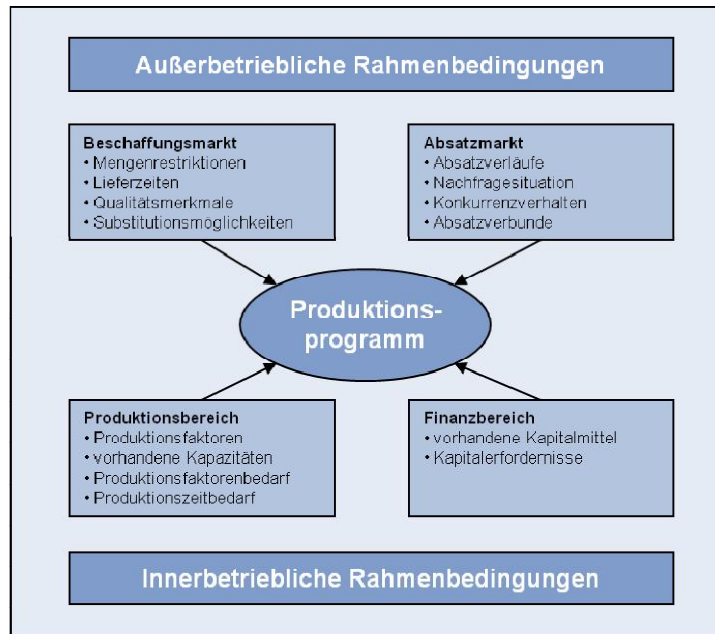

Seite 464, Abb. 29: Analyse der Unternehmenssituation

## KAPITEL E: PRODUKTIONSWIRTSCHAFT

### 3. PRODUKTIONSPLANUNG

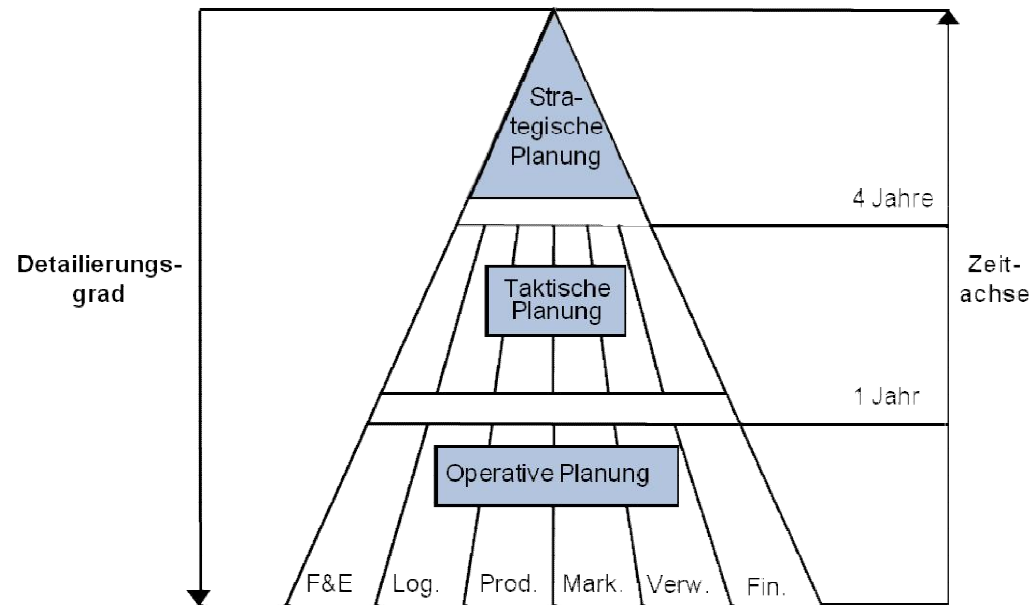

Seite 465, Abb. 30: Hierarchie der Planungsstufen

## KAPITEL E: PRODUKTIONSWIRTSCHAFT

### 3. PRODUKTIONSPLANUNG

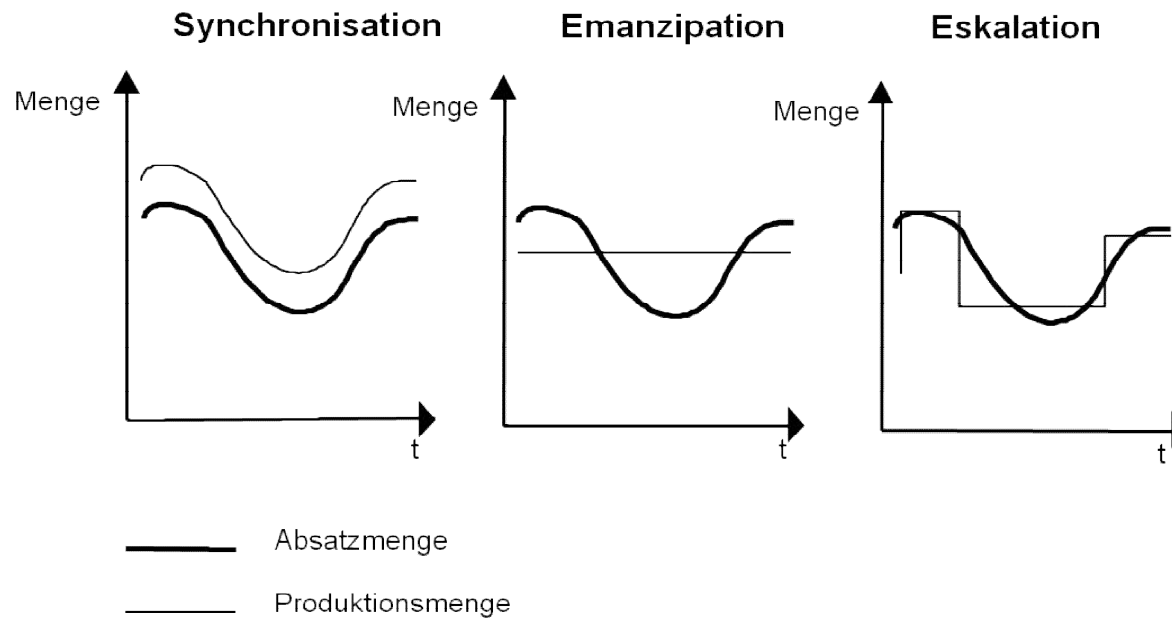

Seite 469, Abb. 31: Synchronisation, Emanzipation und Eskalation

## KAPITEL E: PRODUKTIONSWIRTSCHAFT

### 3. PRODUKTIONSPLANUNG

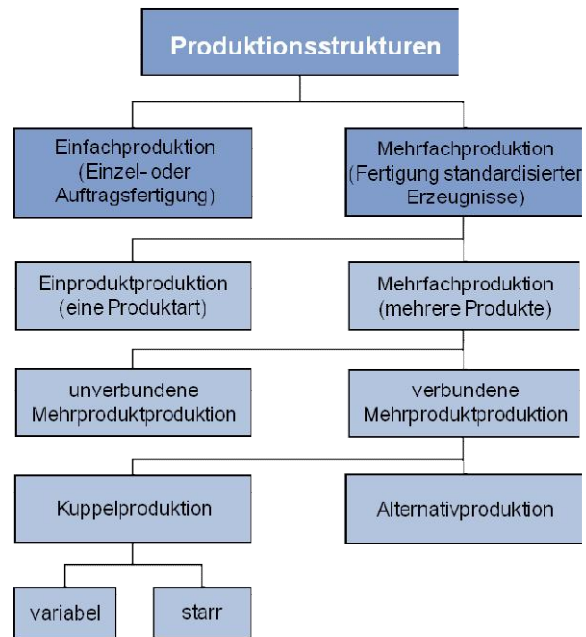

Seite 470, Abb. 32: Produktionsstrukturen

## KAPITEL E: PRODUKTIONSWIRTSCHAFT

### 3. PRODUKTIONSPLANUNG

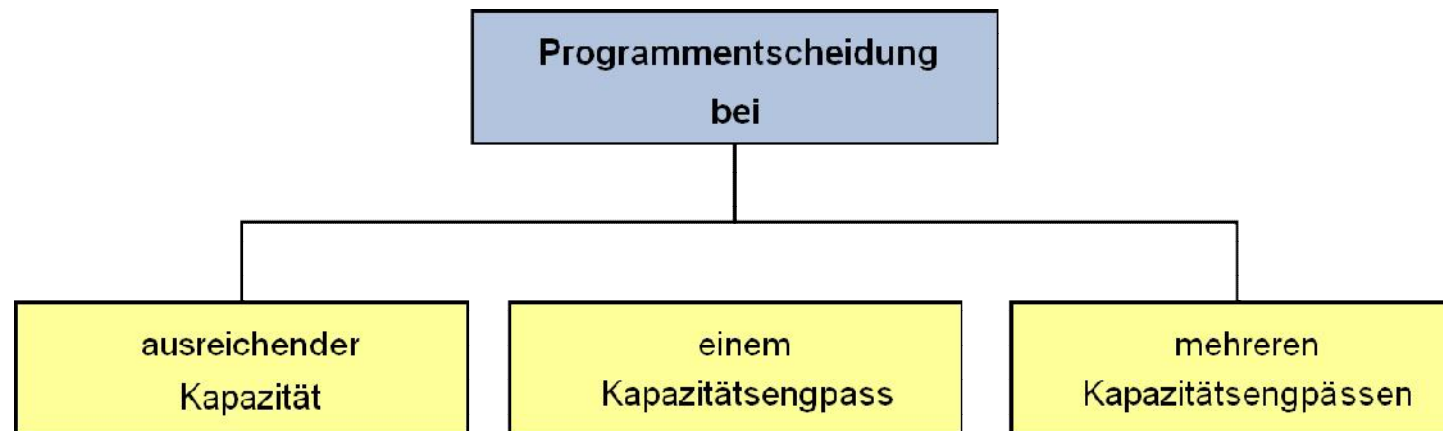

Seite 471, Abb. 33: Programmentscheidungen

## KAPITEL E: PRODUKTIONSWIRTSCHAFT

### 3. PRODUKTIONSPLANUNG

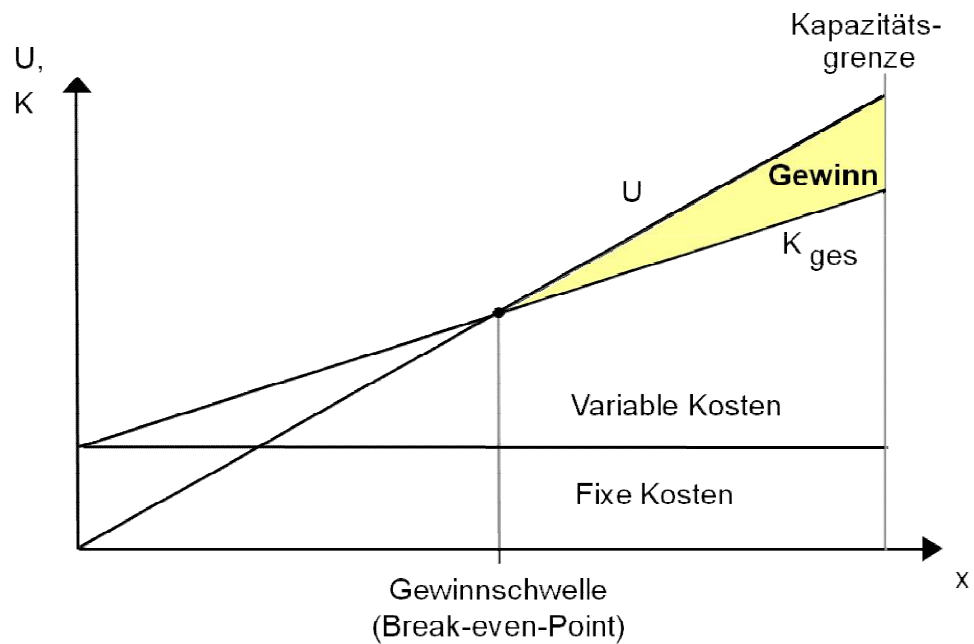

Seite 472, Abb. 34: Gewinnentwicklung bei linearem Gesamtkostenverlauf



## KAPITEL E: PRODUKTIONSWIRTSCHAFT

### 3. PRODUKTIONSPLANUNG

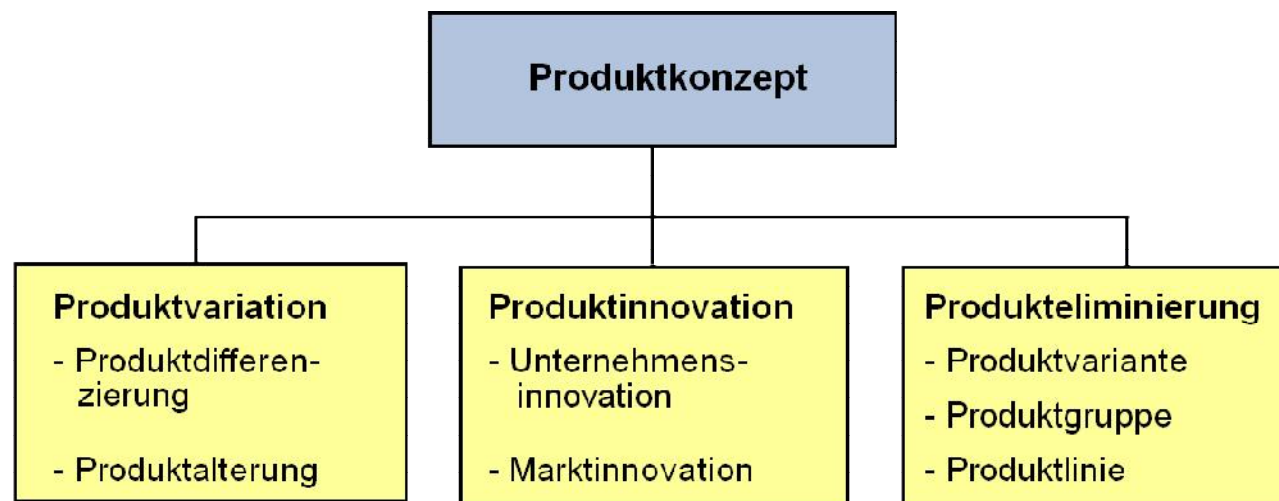

Seite 479, Abb. 35: Produktkonzept

## KAPITEL E: PRODUKTIONSWIRTSCHAFT

### 3. PRODUKTIONSPLANUNG

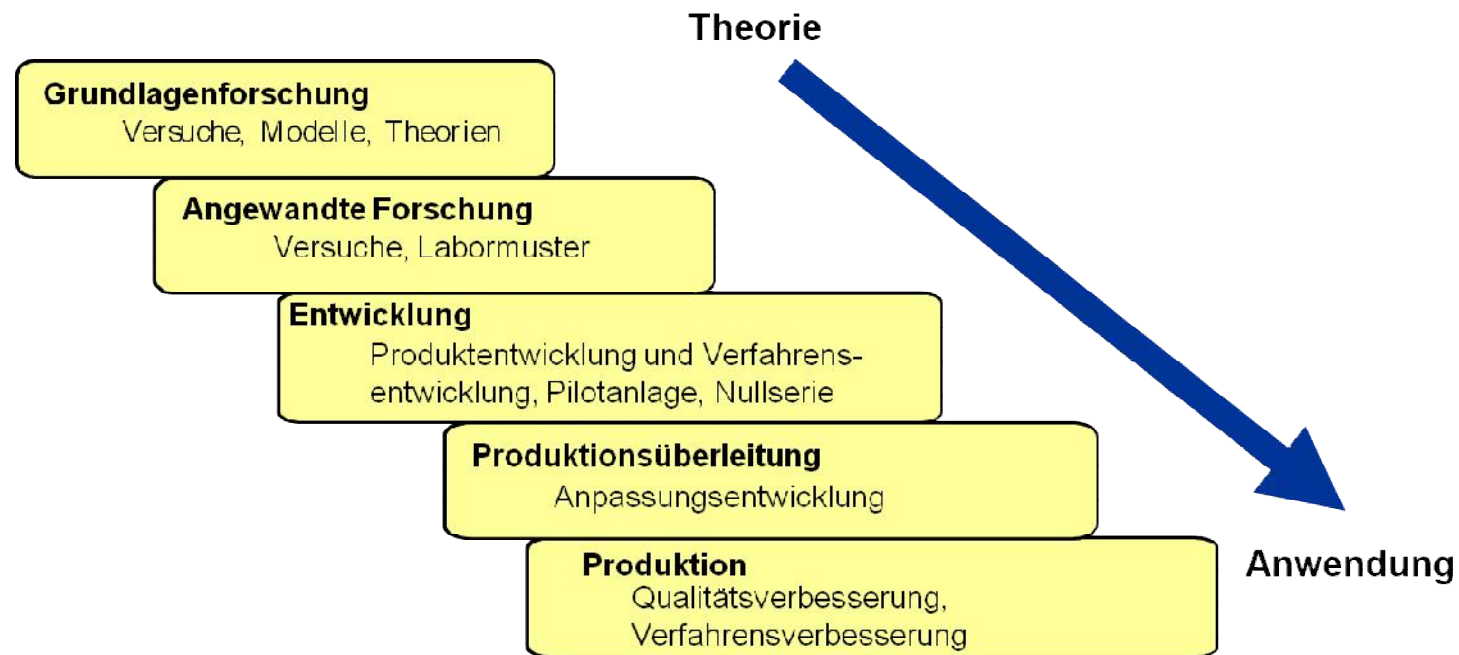

Seite 481, Abb. 36: Forschung und Entwicklung

## KAPITEL E: PRODUKTIONSWIRTSCHAFT

### 3. PRODUKTIONSPLANUNG

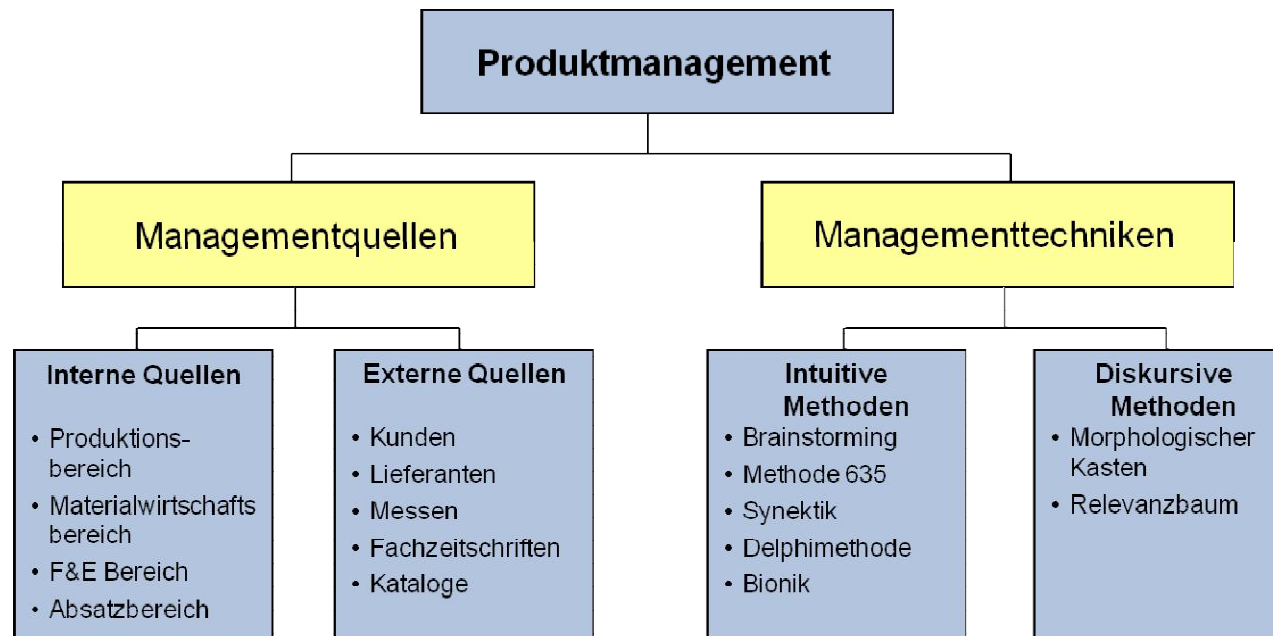

Seite 482, Abb. 37: Produktmanagement

## KAPITEL E: PRODUKTIONSWIRTSCHAFT

### 3. PRODUKTIONSPLANUNG

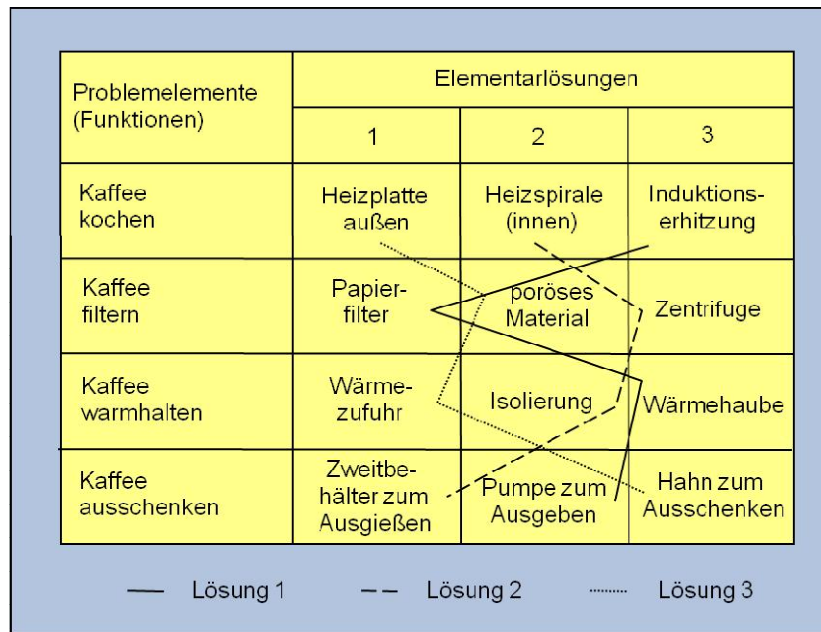

Seite 483, Abb. 38: Morphologische Systematik am Beispiel einer Kaffeemaschine  
(Beschränkung auf drei Lösungsalternativen)

(Vgl. Gelbrich, K./ Wünschmann, S./ Müller, S.: Erfolgsfaktoren des Marketing, München 2008, S. 70 ff)

## KAPITEL E: PRODUKTIONSWIRTSCHAFT

### 3. PRODUKTIONSPLANUNG

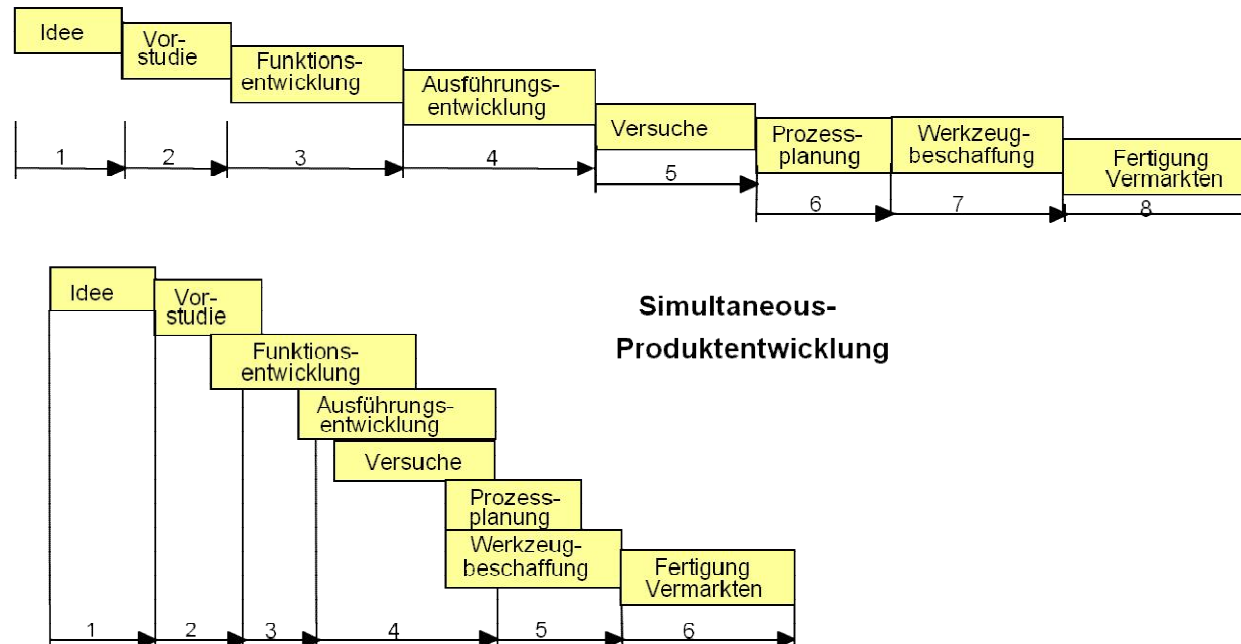

Seite 452, Abb. 39: Zeitvorsprung durch Simultaneous Engineering

## **4. PROZESSGESTALTUNG**

### 4.1 GRUNDLAGEN

### 4.2 MENGENPLANUNG

### 4.3 GROBTERMINIERUNG

### 4.4 STEUERUNG DES PRODUKTIONSPTOZESSES

## KAPITEL E: PRODUKTIONSWIRTSCHAFT

### 4. PROZESSGESTALTUNG

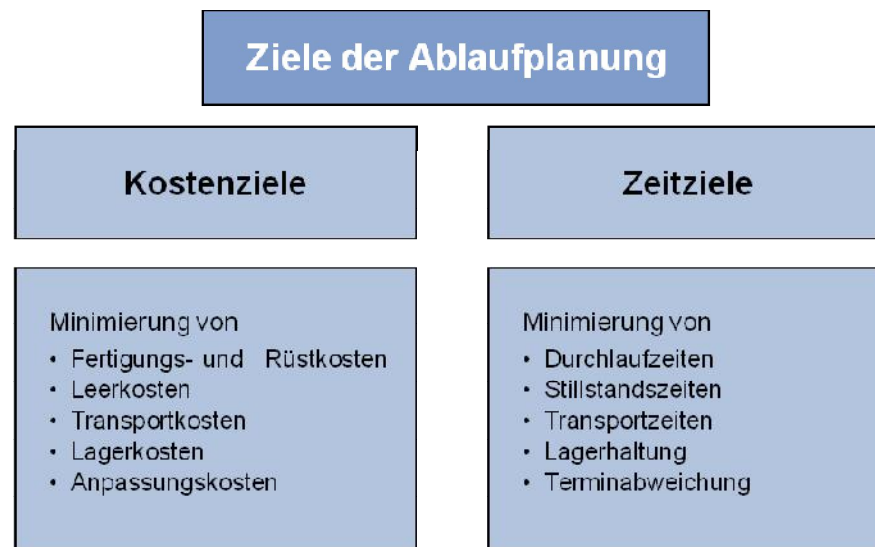

Seite 487, Abb. 40: Kosten- und Zeitziele der Ablaufplanung

## KAPITEL E: PRODUKTIONSWIRTSCHAFT

### 4. PROZESSGESTALTUNG

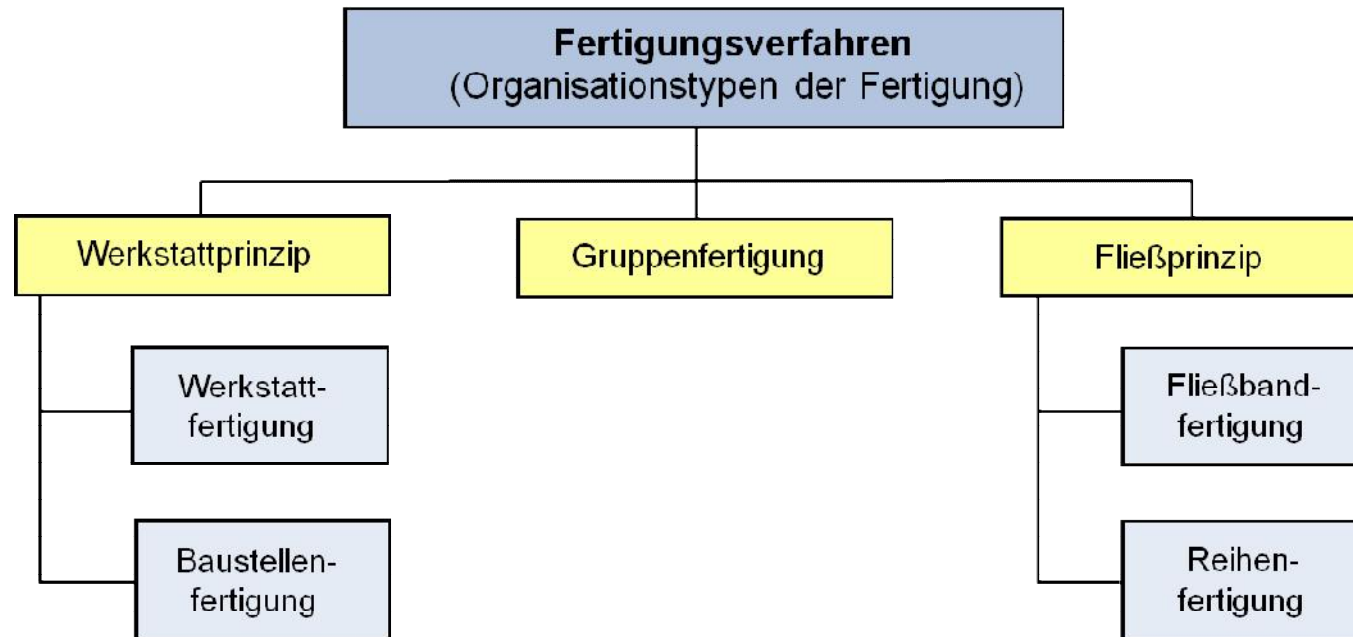

Seite 489, Abb. 41: Organisationstypen der Produktion



## KAPITEL E: PRODUKTIONSWIRTSCHAFT

### 4. PROZESSGESTALTUNG

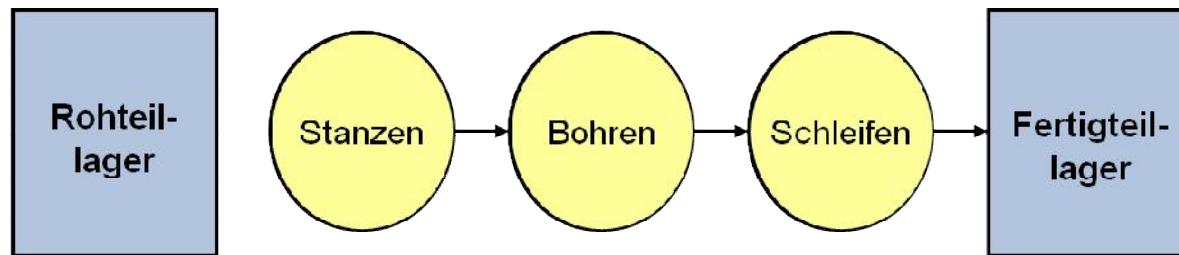

Seite 490, Abb. 42: Beispiel einer Fließfertigung

## KAPITEL E: PRODUKTIONSWIRTSCHAFT

### 4. PROZESSGESTALTUNG

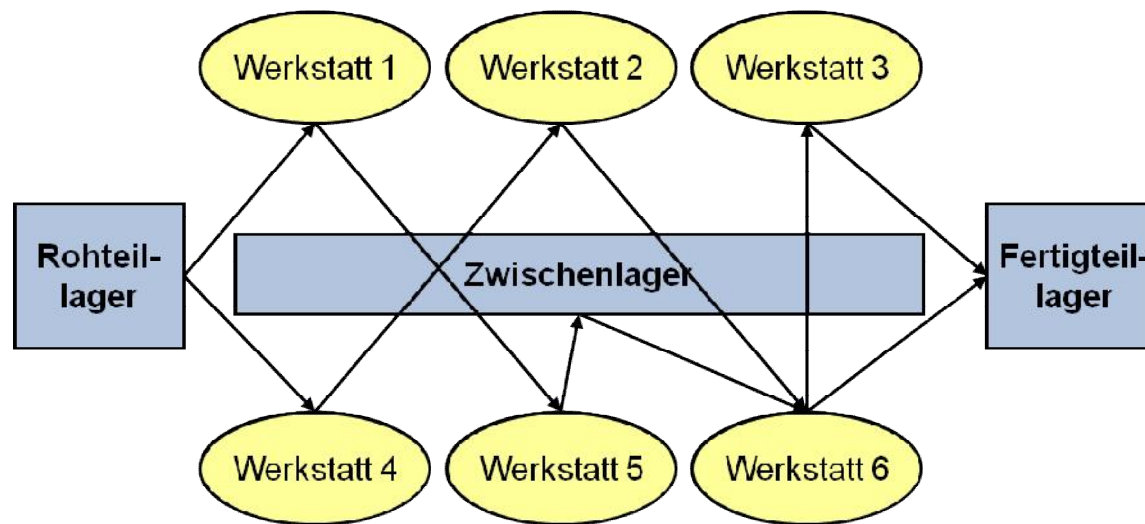

Seite 490, Abb. 42: Beispiel einer Fließfertigung

## KAPITEL E: PRODUKTIONSWIRTSCHAFT

### 4. PROZESSGESTALTUNG

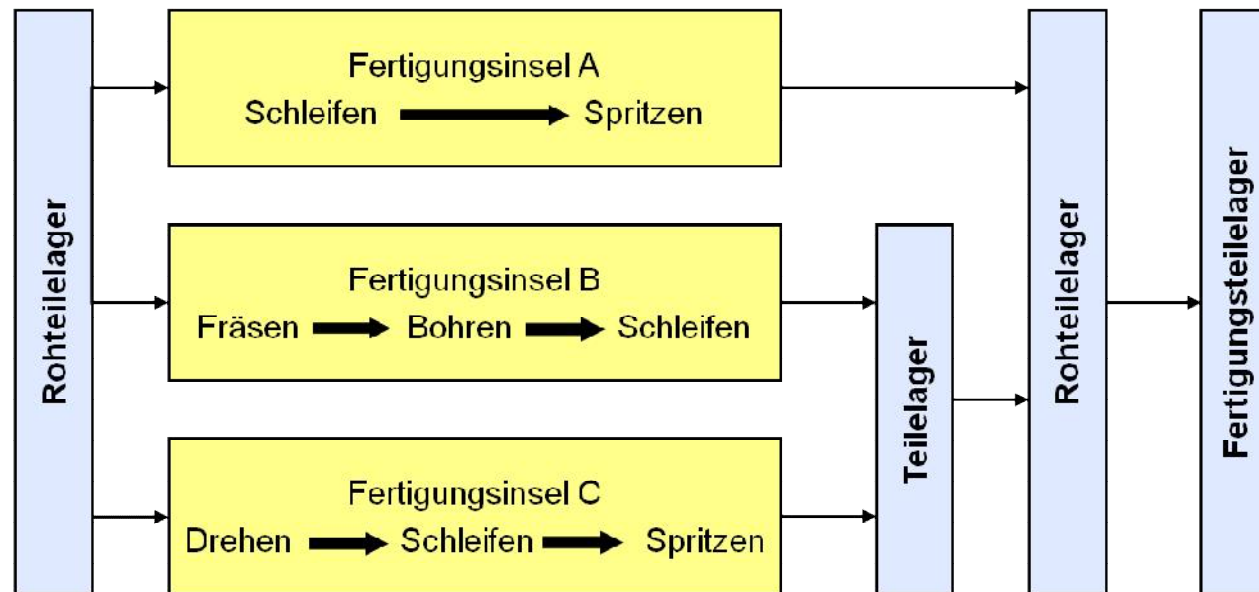

Seite 492, Abb. 44: Beispiel einer Fertigungsinsel

## KAPITEL E: PRODUKTIONSWIRTSCHAFT

### 4. PROZESSGESTALTUNG

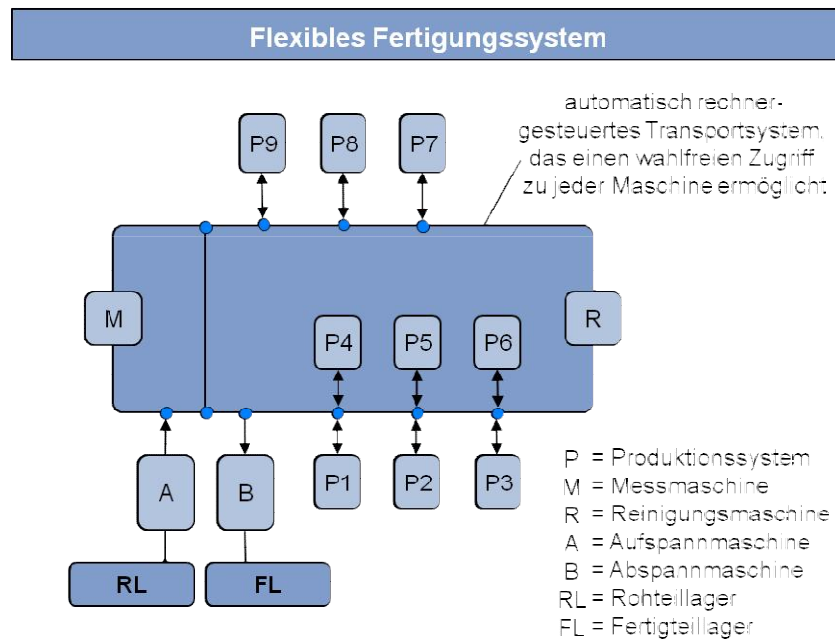

Seite 493, Abb. 45: Flexibles Fertigungssystem

## KAPITEL E: PRODUKTIONSWIRTSCHAFT

### 4. PROZESSGESTALTUNG

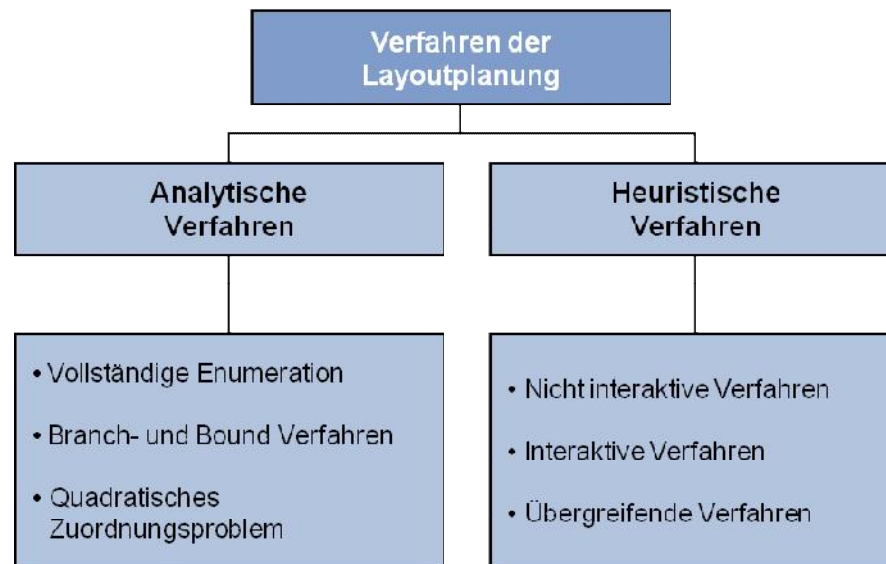

Seite 494, Abb. 46: Auswahl analytischer und heuristischer Verfahren der Layout-Planung

## KAPITEL E: PRODUKTIONSWIRTSCHAFT

### 4. PROZESSGESTALTUNG

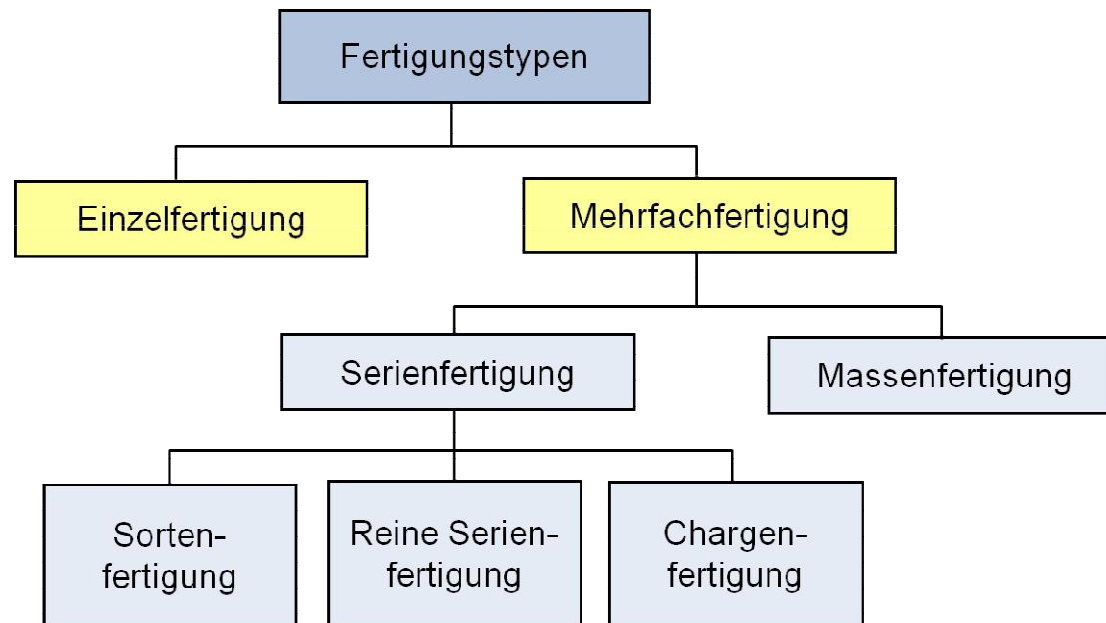

Seite 495, Abb. 47: Fertigungstypen

## KAPITEL E: PRODUKTIONSWIRTSCHAFT

### 4. PROZESSGESTALTUNG

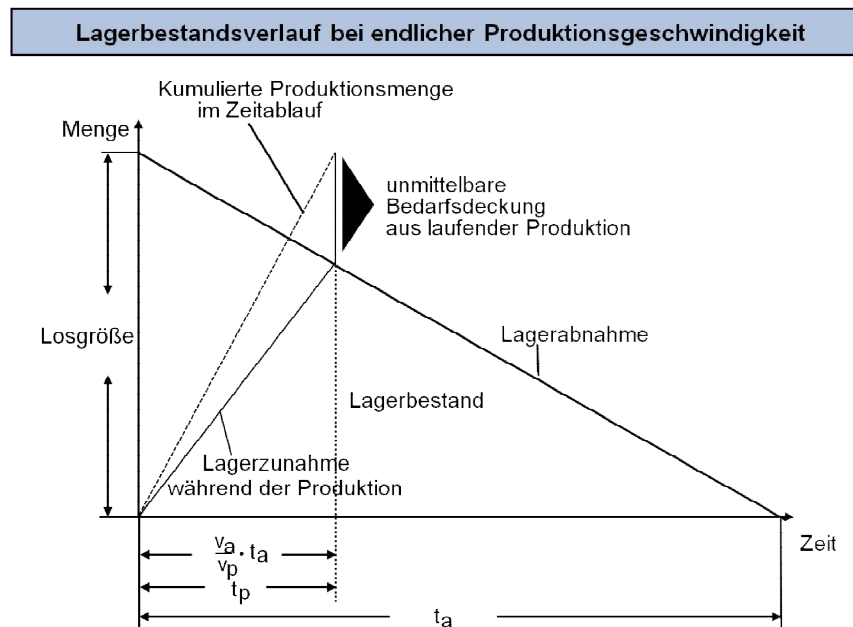

Seite 499, Abb. 48: Lagerbestandsverlauf bei endlicher Produktionsgeschwindigkeit

## KAPITEL E: PRODUKTIONSWIRTSCHAFT

### 4. PROZESSGESTALTUNG

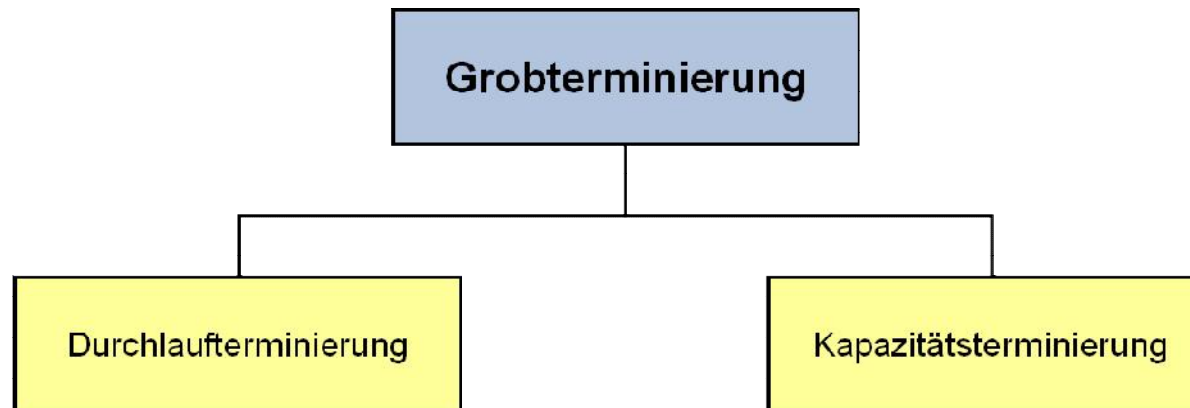

Seite 500, Abb. 49: Grobterminierung



## KAPITEL E: PRODUKTIONSWIRTSCHAFT

### 4. PROZESSGESTALTUNG

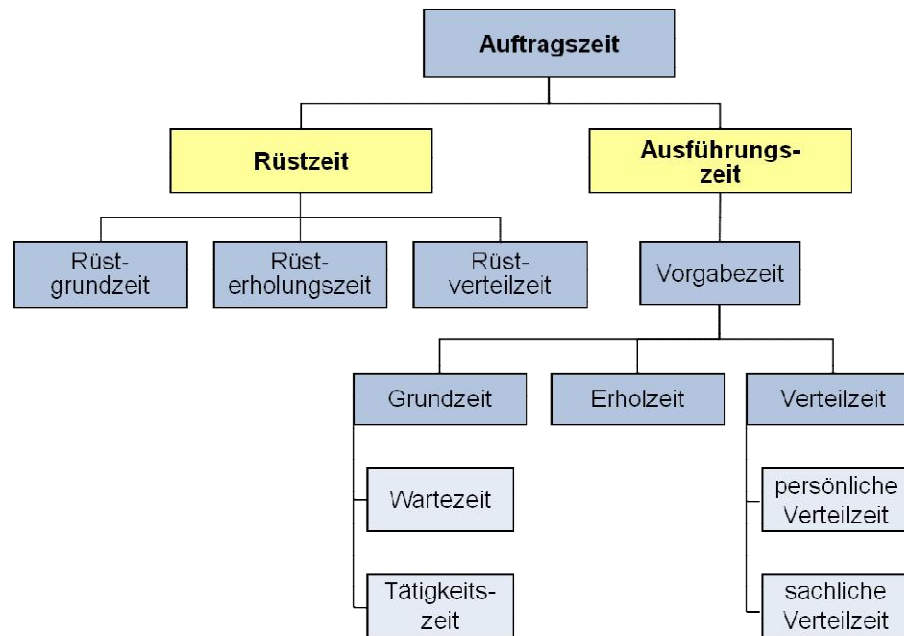

Seite 502, Abb. 50: Gliederung der Auftragszeit

## KAPITEL E: PRODUKTIONSWIRTSCHAFT

### 4. PROZESSGESTALTUNG

| Arbeitsgang | Bezeichnung                   | Dauer in Stunden | Vorhergehender Arbeitsgang | Nachfolgender Arbeitsgang |
|-------------|-------------------------------|------------------|----------------------------|---------------------------|
| A           | Konstruktion, Grobentwurf     | 100              | -                          | B, D                      |
| B           | Detailzeichnungen/-berechnung | 200              | A                          | C, E                      |
| C           | Werkstoffe vorbereiten        | 120              | B                          | F                         |
| D           | Fremdbezüge bestimmen         | 120              | A                          | G                         |
| E           | Gussrahmen herstellen         | 70               | B                          | F                         |
| F           | Einzelteile herstellen        | 170              | C, E                       | H                         |
| G           | Fremdbezüge beschaffen        | 300              | D                          | H, I                      |
| H           | Fremdbezüge montieren         | 40               | F, G                       | J                         |
| I           | Lastversuch vorbereiten       | 120              | G                          | K, L                      |
| J           | Fremdbezüge vorjustieren      | 60               | H                          | K                         |
| K           | Lastversuch durchführen       | 50               | I, J                       | M                         |
| L           | Abnahme vorbereiten           | 70               | I                          | N                         |
| M           | Fremdbezüge entjustieren      | 80               | K                          | N                         |
| N           | Abnahme                       | 20               | L, M                       | -                         |

Seite 504, Abb. 51: Vorgangsliste

## KAPITEL E: PRODUKTIONSWIRTSCHAFT

### 4. PROZESSGESTALTUNG

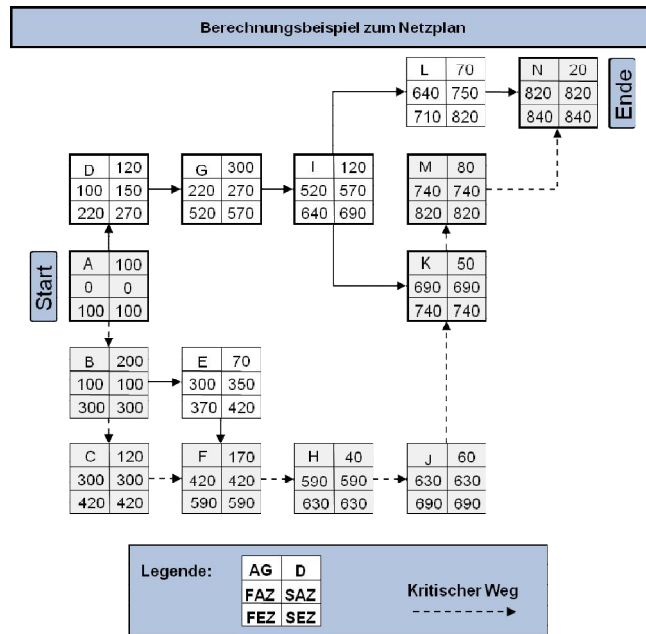

Seite 506, Abb. 52: Netzplan

## KAPITEL E: PRODUKTIONSWIRTSCHAFT

### 4. PROZESSGESTALTUNG

| Arbeitsgang | Dauer D | Zeitpunkte |     |     |     | Pufferzeit |    |
|-------------|---------|------------|-----|-----|-----|------------|----|
|             |         | FAZ        | FEZ | SAZ | SEZ | GP         | FP |
| A           | 100     | 0          | 100 | 0   | 100 | 0          | 0  |
| B           | 200     | 100        | 300 | 100 | 300 | 0          | 0  |
| C           | 120     | 300        | 420 | 300 | 420 | 0          | 0  |
| D           | 120     | 100        | 220 | 150 | 270 | 50         | 0  |
| E           | 70      | 300        | 370 | 350 | 420 | 50         | 0  |
| F           | 170     | 420        | 590 | 420 | 590 | 0          | 0  |
| G           | 300     | 220        | 520 | 270 | 570 | 50         | 0  |
| H           | 40      | 590        | 630 | 590 | 630 | 0          | 0  |
| I           | 120     | 520        | 640 | 570 | 690 | 50         | 0  |
| J           | 60      | 630        | 690 | 630 | 690 | 0          | 0  |
| K           | 50      | 690        | 740 | 690 | 740 | 0          | 0  |
| L           | 70      | 640        | 710 | 750 | 820 | 110        | 60 |
| M           | 80      | 740        | 820 | 740 | 820 | 0          | 0  |
| N           | 20      | 820        | 840 | 820 | 840 | 0          | 0  |

Seite 507, Abb. 53: Tabellarische Darstellung der Ergebnisse der Durchlaufterminierung

## KAPITEL E: PRODUKTIONSWIRTSCHAFT

### 4. PROZESSGESTALTUNG

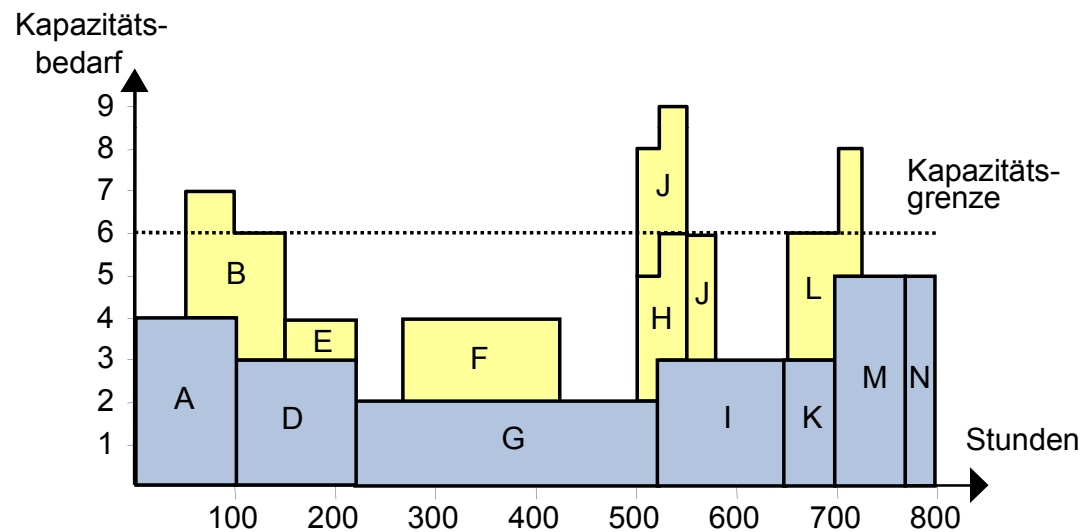

Seite 508, Abb. 54: Kapazitätsbelastung gemäß Terminplanung

## KAPITEL E: PRODUKTIONSWIRTSCHAFT

### 4. PROZESSGESTALTUNG

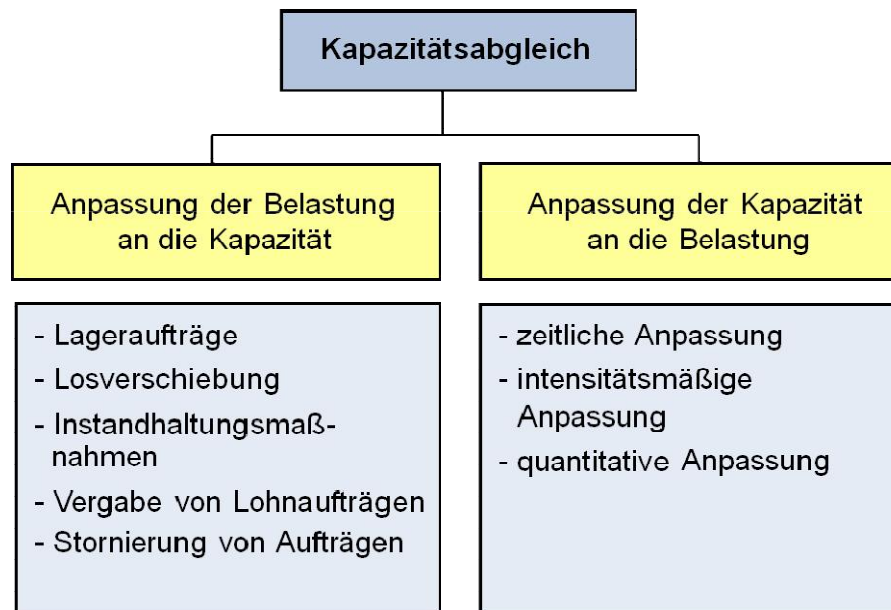

Seite 508, Abb. 55: Maßnahmen des Kapazitätsabgleichs

## KAPITEL E: PRODUKTIONSWIRTSCHAFT

### 4. PROZESSGESTALTUNG

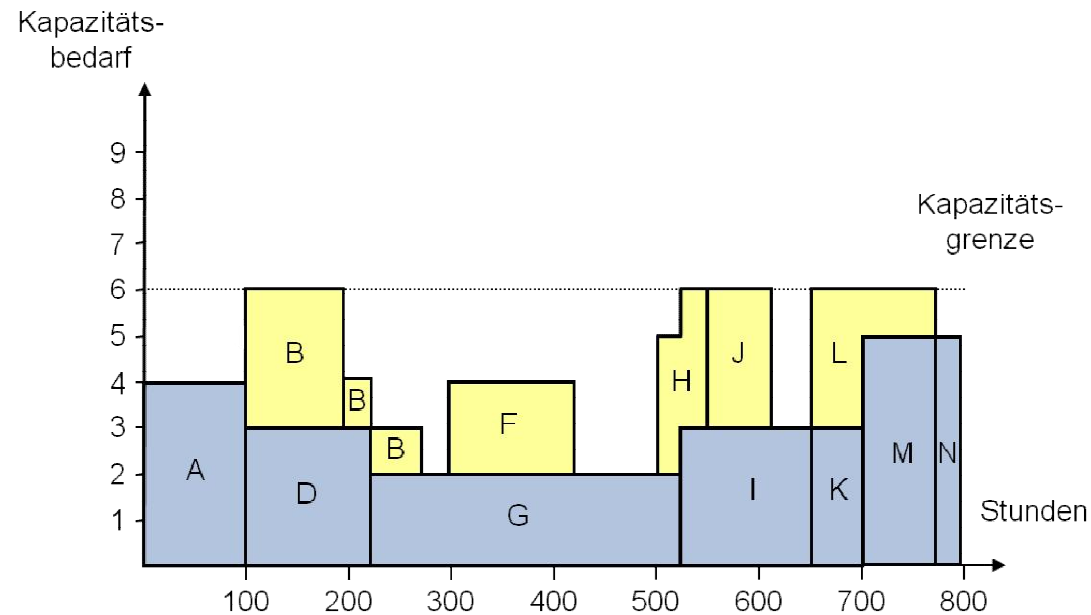

Seite 509, Abb. 56: Kapazitätsbelastung nach dem Kapazitätsabgleich

## KAPITEL E: PRODUKTIONSWIRTSCHAFT

### 4. PROZESSGESTALTUNG

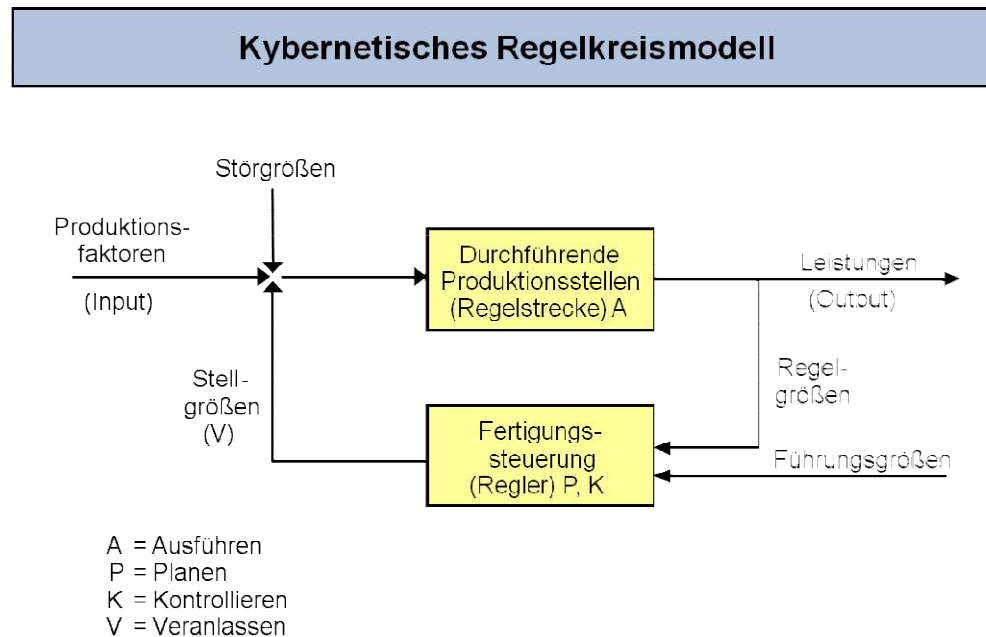

Seite 510, Abb. 57: Das kybernetische Regelkreis-Modell



## KAPITEL E: PRODUKTIONSWIRTSCHAFT

### 4. PROZESSGESTALTUNG

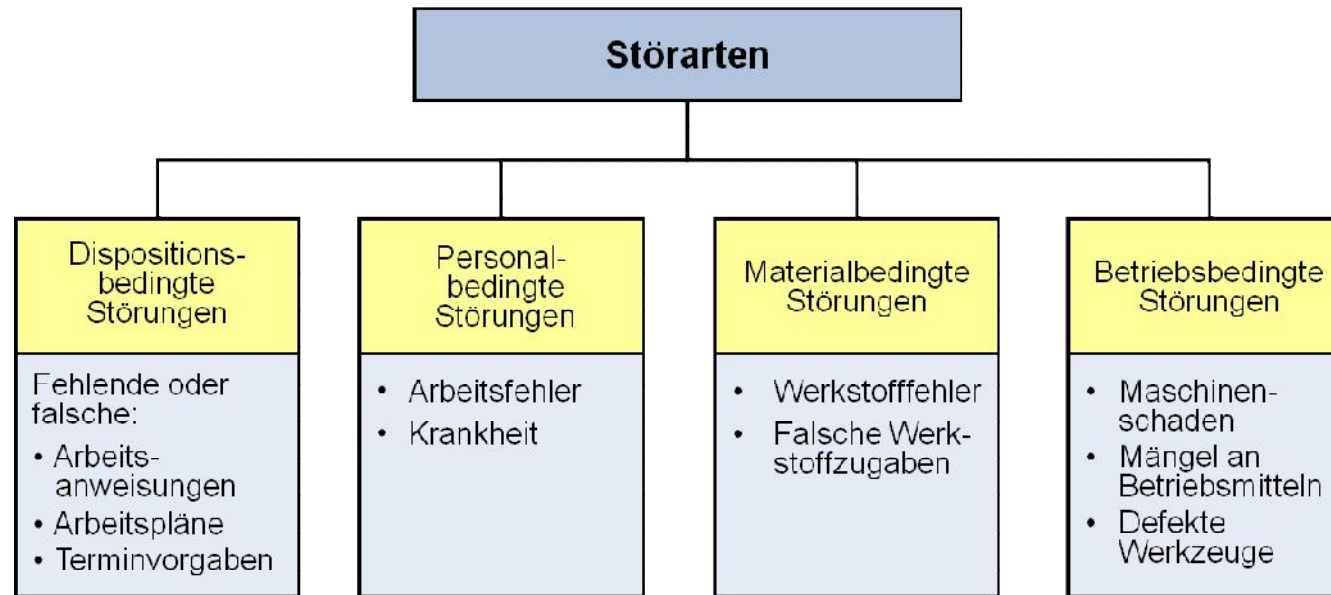

Seite 511, Abb. 58: Störarten der Aufgabendurchführung

## KAPITEL E: PRODUKTIONSWIRTSCHAFT

### 4. PROZESSGESTALTUNG

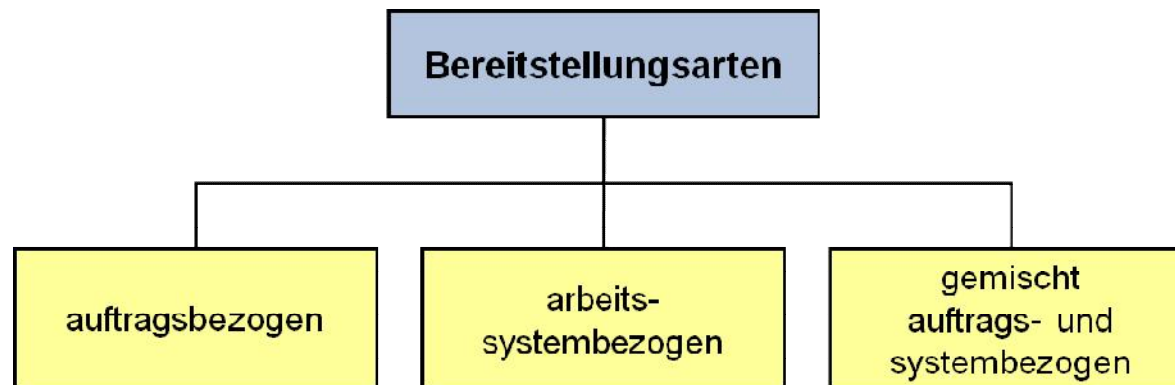

Seite 511, Abb. 59: Arten der Bereitstellung

## KAPITEL E: PRODUKTIONSWIRTSCHAFT

### 4. PROZESSGESTALTUNG

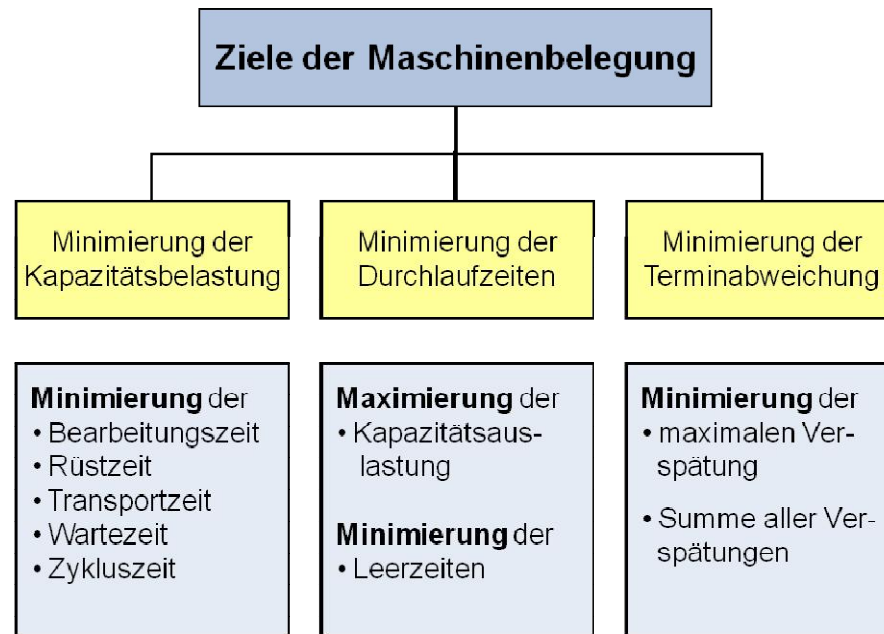

Seite 513, Abb. 60: Ziele der Maschinenbelegung  
 (Vgl. Gutenberg, E.: Grundlagen der Betriebswirtschaftslehre, Bd. 1: Die Produktion, 24. Aufl.,  
Berlin / Heidelberg 1983, S. 216)

*Jung: Allgemeine Betriebswirtschaftslehre. De Gruyter Oldenbourg 2016. ISBN 978-3-486-76376-8*

## KAPITEL E: PRODUKTIONSWIRTSCHAFT

### 4. PROZESSGESTALTUNG

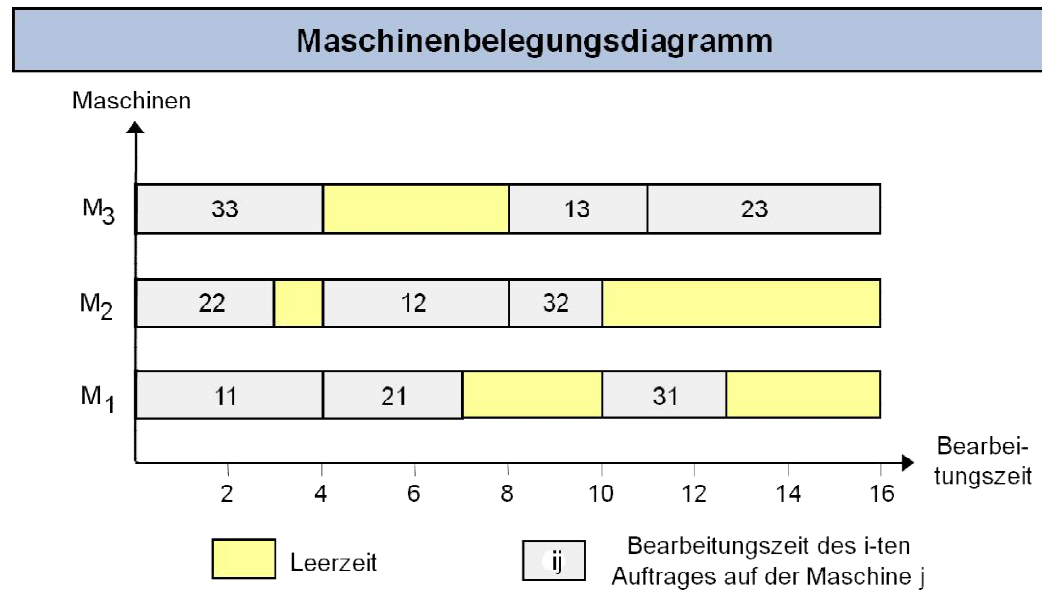

Seite 514, Abb. 61: Ziele der Maschinenbelegungsdiagramm

## KAPITEL E: PRODUKTIONSWIRTSCHAFT

### 4. PROZESSGESTALTUNG

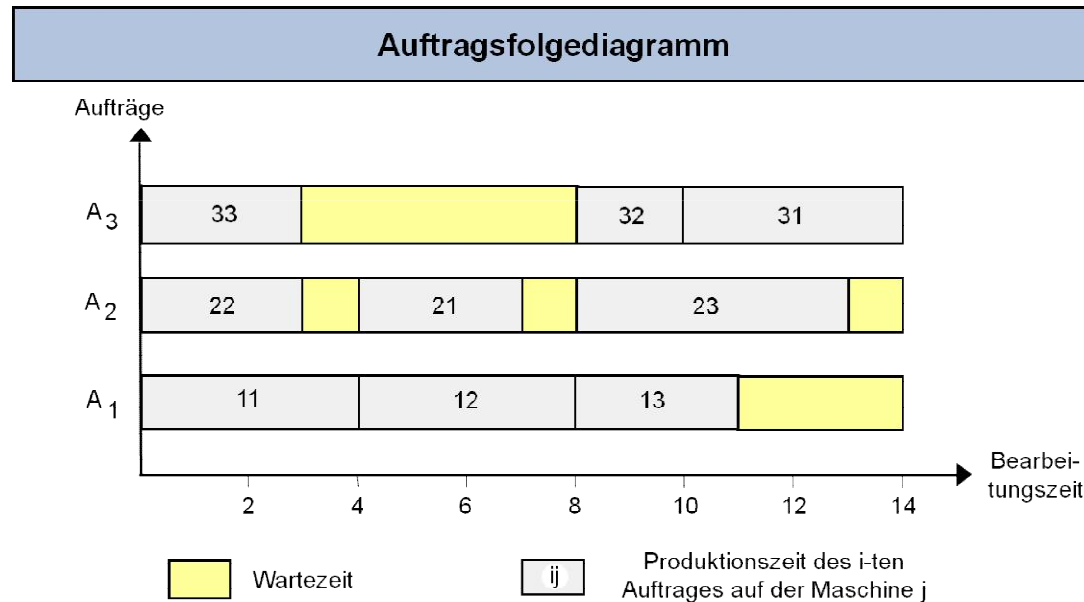

Seite 515, Abb. 62: Auftragsfolgediagramm

## KAPITEL E: PRODUKTIONSWIRTSCHAFT

### 4. PROZESSGESTALTUNG

| Identische Maschinenfolge<br>(Flow-shop-Probleme)                                                                                                                                                                                                                                                                                                      | Nicht-identische Maschinenfolge<br>(Job-shop-Probleme)                                                                                                                                                                                                                                                                          |
|--------------------------------------------------------------------------------------------------------------------------------------------------------------------------------------------------------------------------------------------------------------------------------------------------------------------------------------------------------|---------------------------------------------------------------------------------------------------------------------------------------------------------------------------------------------------------------------------------------------------------------------------------------------------------------------------------|
| M = 2, n = beliebig                                                                                                                                                                                                                                                                                                                                    |                                                                                                                                                                                                                                                                                                                                 |
| Einfaches kombinatorisches Verfahren:<br>Johnson 1954, Mitten 1959                                                                                                                                                                                                                                                                                     |                                                                                                                                                                                                                                                                                                                                 |
| M = 3, n = beliebig                                                                                                                                                                                                                                                                                                                                    |                                                                                                                                                                                                                                                                                                                                 |
| Einfaches kombinatorisches Verfahren:<br>Johnson 1954, Lomnicki 1959, Swarc 1974                                                                                                                                                                                                                                                                       |                                                                                                                                                                                                                                                                                                                                 |
| M = beliebig, n = 2                                                                                                                                                                                                                                                                                                                                    |                                                                                                                                                                                                                                                                                                                                 |
|                                                                                                                                                                                                                                                                                                                                                        | Grafisches Verfahren:<br>Akers 1956, Szwarc 1960,<br>Hardgrave/Nemhauser 1963,<br>Mensch 1968, Riedesser 1971                                                                                                                                                                                                                   |
| M = n = beliebig                                                                                                                                                                                                                                                                                                                                       |                                                                                                                                                                                                                                                                                                                                 |
| Branch-and-Bound-Verfahren:<br>Jaeschke 1964, Ignall/Scharge 1965,<br>Brown/Lomnicki 1966, Mc Mahon/ Burton<br>1967, Gupta 1969, Müller-Mehrbach 1966,<br>1970<br>Überführung in ein Travelling-Sales-man-<br>Problem: Piehler 1960, Seiffart 1961<br>Heuristische Verfahren:<br>Palmer 1965, Campbell/Dudek/Smith<br>1970, Gupta 1971, Liesegang 1974 | Heuristisches Verfahren:<br>Akers/Friedman 1955,<br>Griffier/Thompson 1960,<br>Heller/Logemann 1961<br>Prioritätsregelverfahren: (diverse Verfasser)<br>Branch-and-Bound-Verfahren:<br>Brooks/White 1965, Charlton/Death 1970,<br>Ashour/Hiremath 1973, Siegel 1974, 1976,<br>Argyris 1977<br>Gemischt-ganzzahlige Optimierung: |
| M = Anzahl von Maschinen, n = Anzahl der Aufträge                                                                                                                                                                                                                                                                                                      |                                                                                                                                                                                                                                                                                                                                 |

Seite 516, Abb. 63: Übersicht über Verfahren zur Lösung von Maschinenbelegungsproblemen

## **5. INTEGRATIVE PLANUNG UND STEUERUNG DES PRODUKTIONSABLAUFS**

5.1 AUFBAU DES PRODUKTIONSPLANUNGS- UND -STEUERUNGSSYSTEMS

5.2 JUST-IN-TIME- (JIT) GERECHTE PRODUKTION

5.3 PPS ALS CIM-BAUSTEIN

5.4 DIE INTEGRATION VON INFORMATIONSFLOSS- UND  
MATERIALFLUSSKONZEPTEN

## KAPITEL E: PRODUKTIONSWIRTSCHAFT

### 5. INTEGRATIVE PLANUNG UND STEUERUNG DES PRODUKTIONSABLAUFS

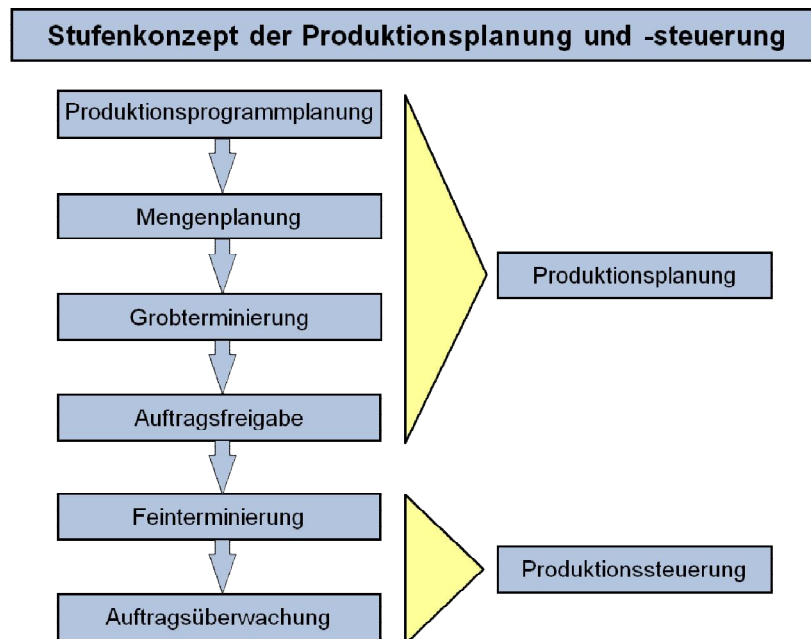

Seite 519, Abb. 64: Das Stufenkonzept der Produktionsplanung und -steuerung



## KAPITEL E: PRODUKTIONSWIRTSCHAFT

### 5. INTEGRATIVE PLANUNG UND STEUERUNG DES PRODUKTIONSABLAUFS

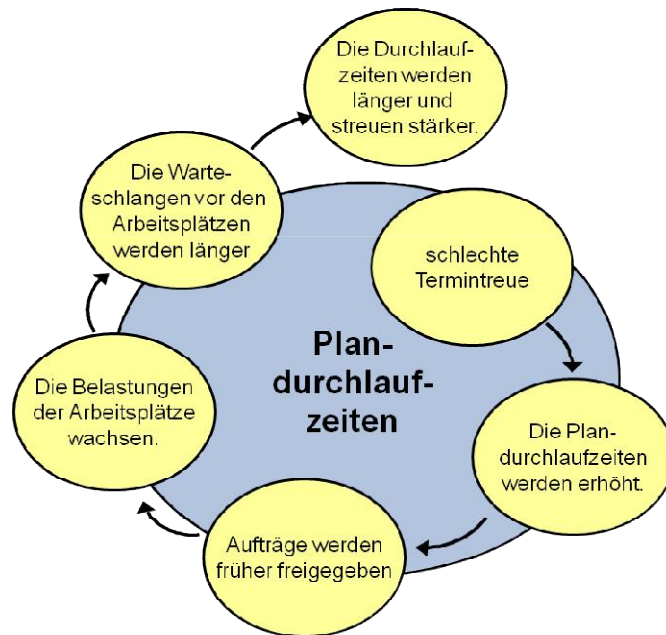

Seite 520, Abb. 65: Das Durchlaufzeitsyndrom  
(Vgl. Wiendahl, H.-P.: Belastungsorientierte Fertigungssteuerung, München / Wien 1987, S. 22)

## KAPITEL E: PRODUKTIONSWIRTSCHAFT

### 5. INTEGRATIVE PLANUNG UND STEUERUNG DES PRODUKTIONSABLAUFS

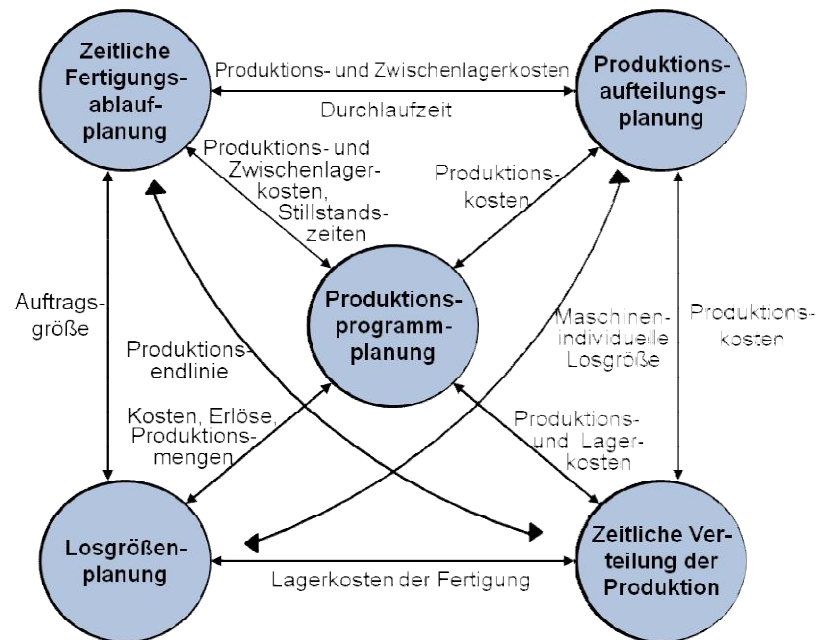

Seite 521, Abb. 66: Interdependenzen der Teilpläne der PPS  
 (Vgl. Adam, D.: Produktionsdurchführungsplanung. In: Industriebetriebslehre, Jacob H. (Hrsg.),  
 4. Aufl., Wiesbaden 1990, S. 682)

Jung: Allgemeine Betriebswirtschaftslehre. De Gruyter Oldenbourg 2016. ISBN 978-3-486-76376-8

## KAPITEL E: PRODUKTIONSWIRTSCHAFT

### 5. INTEGRATIVE PLANUNG UND STEUERUNG DES PRODUKTIONSABLAUFS

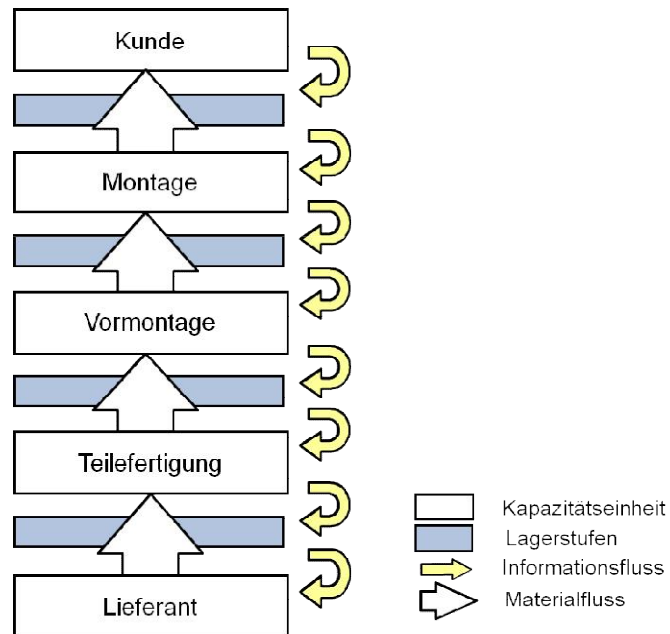

Seite 522, Abb. 67: Die logistische Kette zwischen Abnehmer, Produzent und Zulieferer

## KAPITEL E: PRODUKTIONSWIRTSCHAFT

### 5. INTEGRATIVE PLANUNG UND STEUERUNG DES PRODUKTIONSABLAUFS

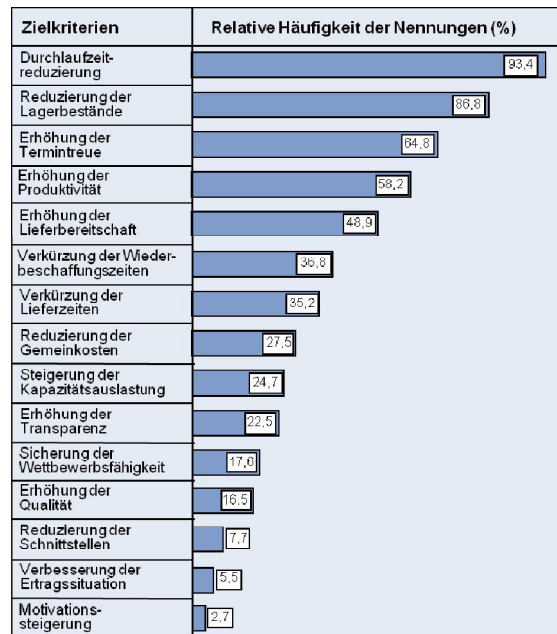

Seite 525, Abb. 68: Zielkriterien des JIT-Konzeptes  
(Vgl. Wildemann, H.: Das Just-In-Time-Konzept. Produktion und Zulieferung auf Abruf, 2. Aufl., München 1990, S. 216)

*Jung: Allgemeine Betriebswirtschaftslehre. De Gruyter Oldenbourg 2016. ISBN 978-3-486-76376-8*

76

## KAPITEL E: PRODUKTIONSWIRTSCHAFT

### 5. INTEGRATIVE PLANUNG UND STEUERUNG DES PRODUKTIONSABLAUFS

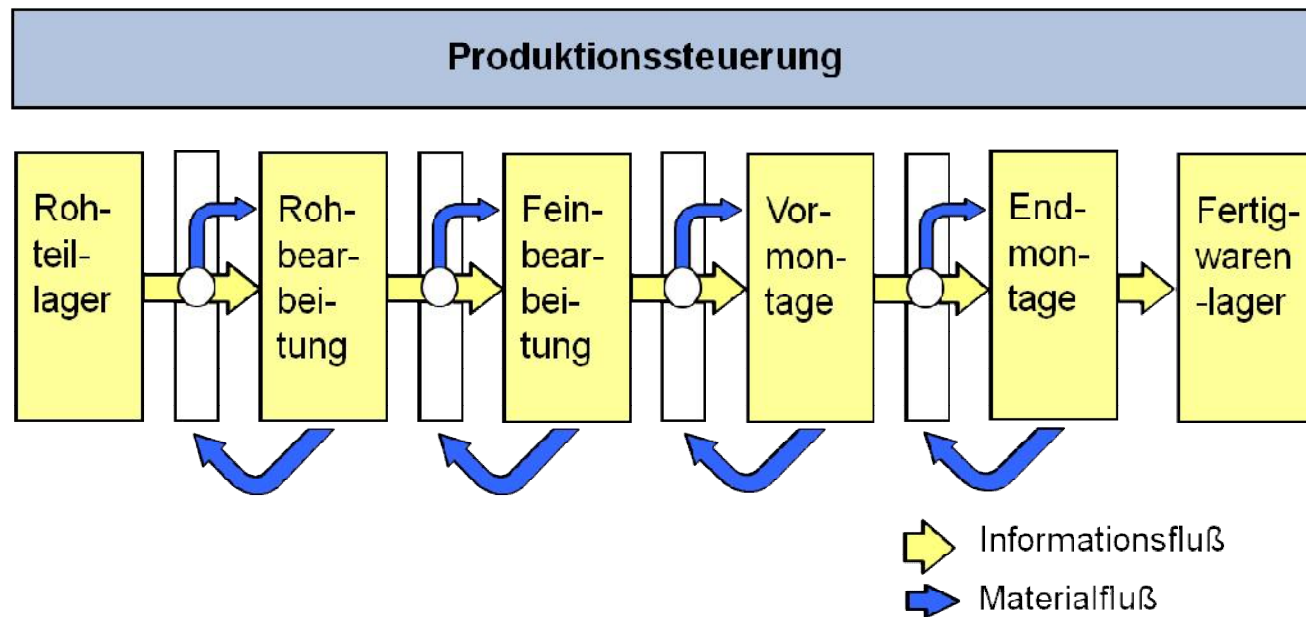

Seite 527, Abb. 69: Der Regelkreis des Kanban-Systems

## KAPITEL E: PRODUKTIONSWIRTSCHAFT

### 5. INTEGRATIVE PLANUNG UND STEUERUNG DES PRODUKTIONSABLAUFS

#### Trichterprinzip und Durchlaufdiagramm

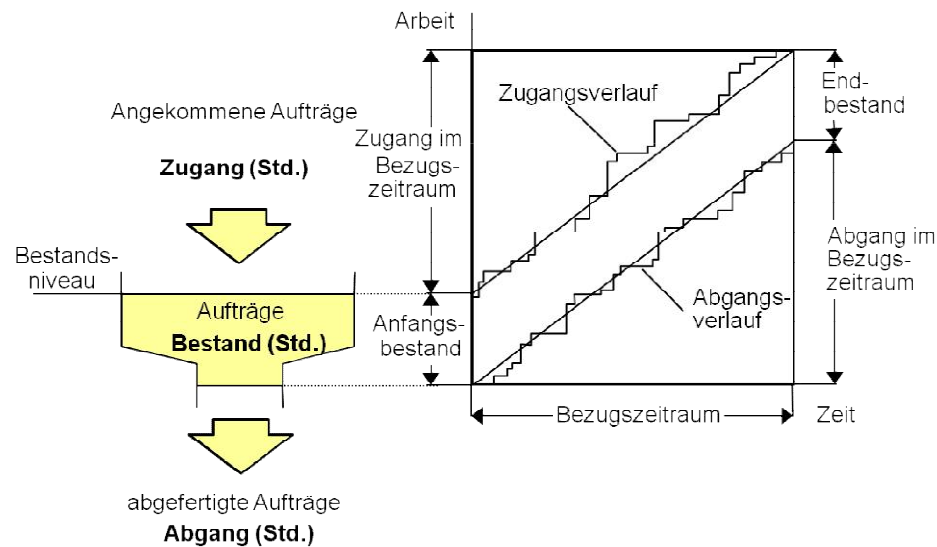

Seite 528, Abb. 70: Trichtermodell und Durchlaufdiagramm  
(Vgl. Wiendahl, H.-P.: Belastungsorientierte Fertigungssteuerung, München / Wien 1987, S. 206)

## KAPITEL E: PRODUKTIONSWIRTSCHAFT

### 5. INTEGRATIVE PLANUNG UND STEUERUNG DES PRODUKTIONSABLAUFS

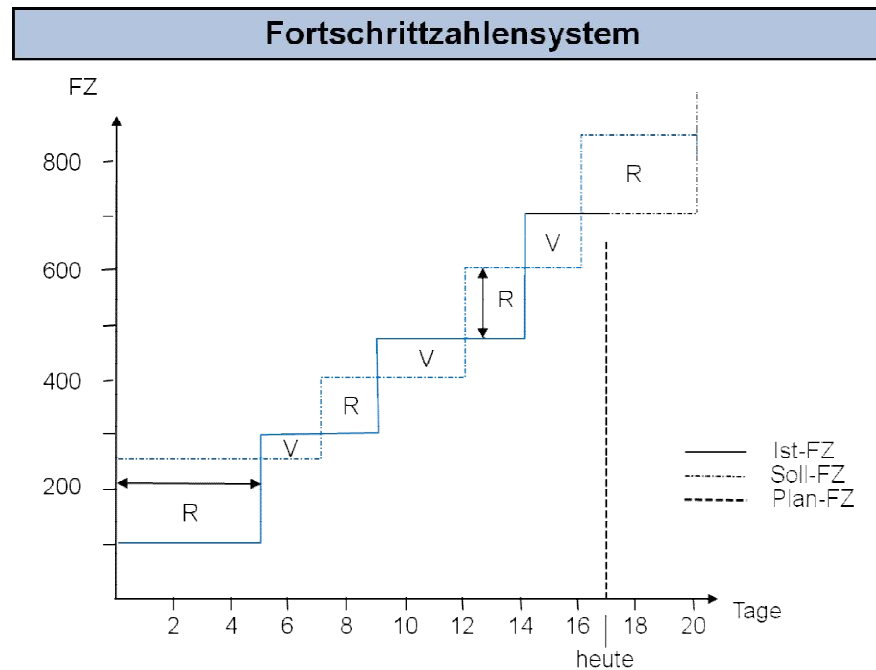

Seite 532, Abb. 71: Verläufe von Ist-, Soll- und Plan-Fortschrittszahlen

## KAPITEL E: PRODUKTIONSWIRTSCHAFT

### 5. INTEGRATIVE PLANUNG UND STEUERUNG DES PRODUKTIONSABLAUFS

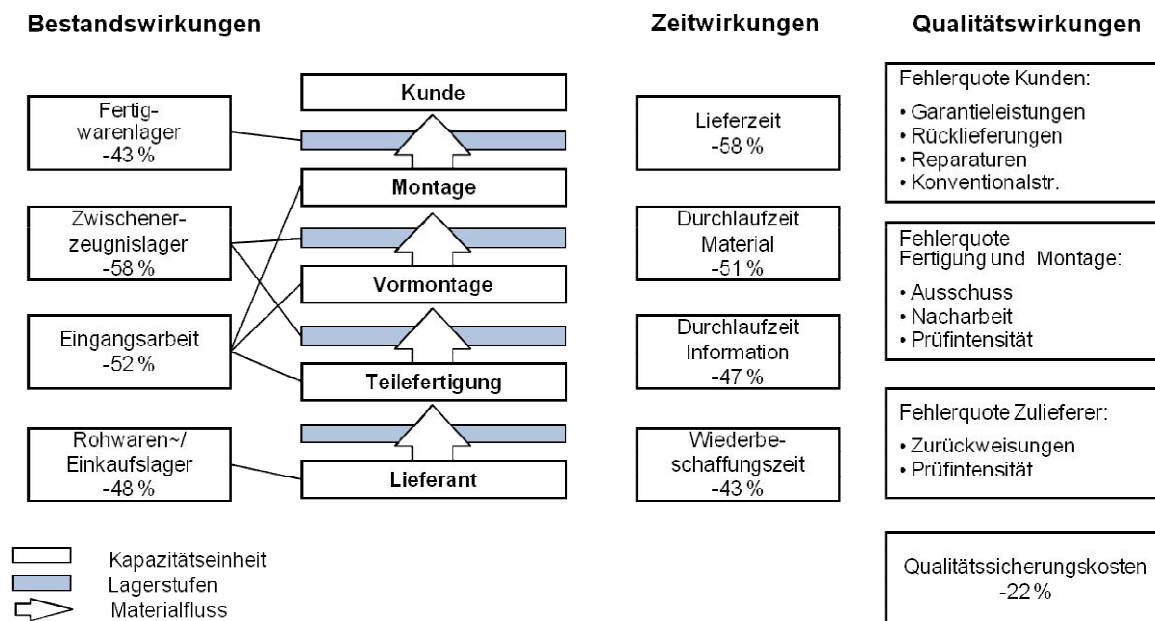

Seite 534, Abb. 72: Bestands-, Zeit-, und Qualitätswirkung bei Anwendungen des JIT-Konzeptes in der logistischen Aufbaukette



## KAPITEL E: PRODUKTIONSWIRTSCHAFT

### 5. INTEGRATIVE PLANUNG UND STEUERUNG DES PRODUKTIONSABLAUFS

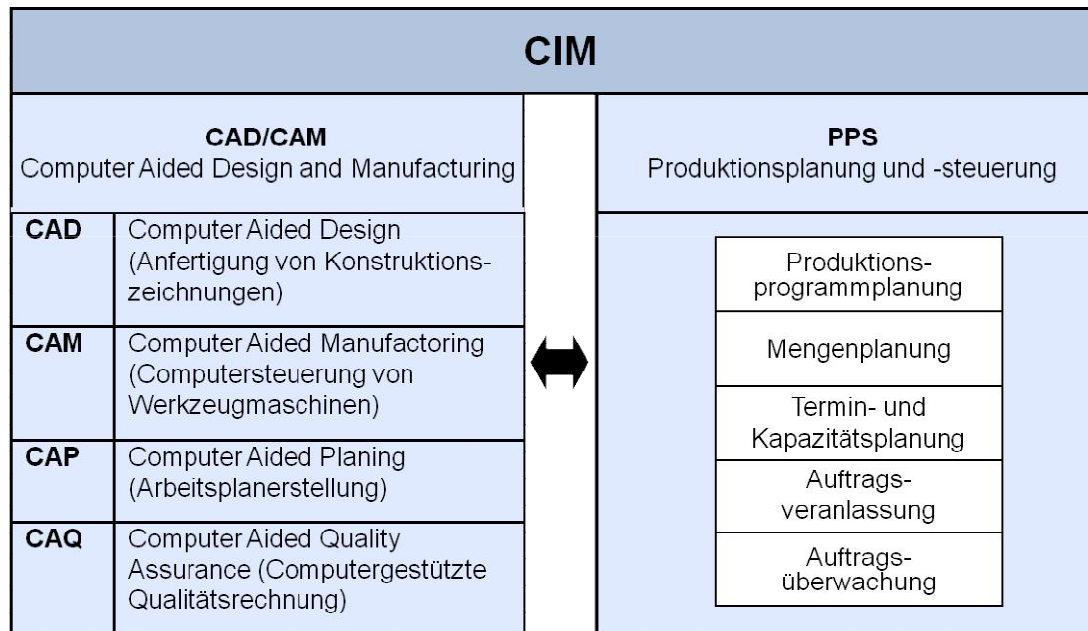

Seite 536, Abb. 73: Komponenten eines CIM-Konzepts  
(in Anlehnung an AWF (Hrsg.): Integrierter EDV-Einsatz in der Produktion, Eschborn 1985, S. 10)

## KAPITEL E: PRODUKTIONSWIRTSCHAFT

### 5. INTEGRATIVE PLANUNG UND STEUERUNG DES PRODUKTIONSABLAUFS

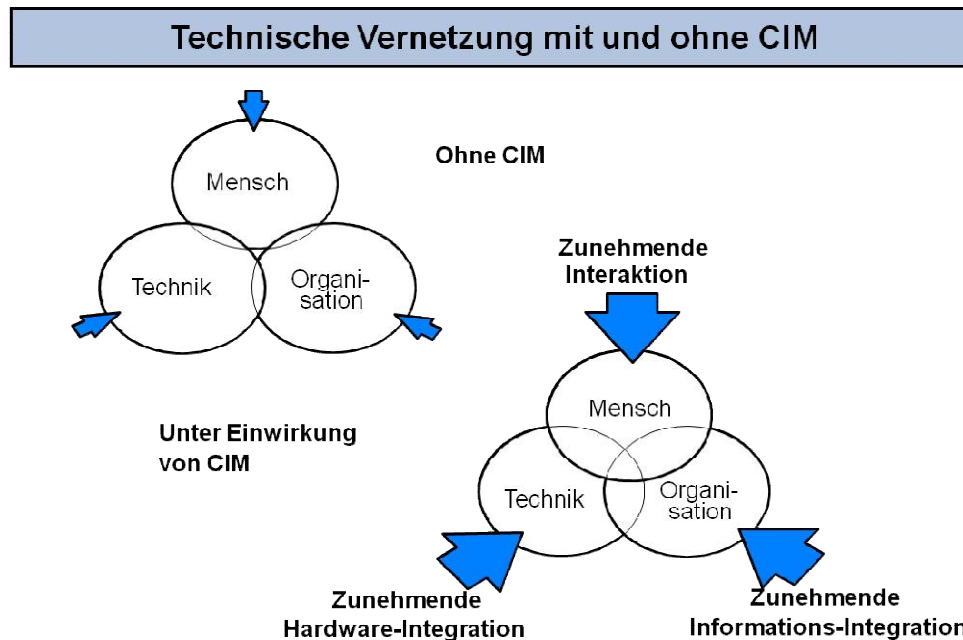

Seite 538, Abb. 74: CIM bedeutet Integration von Mensch, Technik und Organisation (Vgl. Bullinger, H. J.: Integrierte Informations- und Produktionssysteme in arbeitswissenschaftlicher Betrachtung. In: Noack, M./Wegner, K./Gluch, D./Dienhart, U. (Hrsg.): CIM. Integration und Vernetzung, Berlin u.a. 1990, S. 89)

Jung: Allgemeine Betriebswirtschaftslehre. De Gruyter Oldenbourg 2016. ISBN 978-3-486-76376-8

## **6. DIE PRODUKTION ALS WETTBEWERBSFAKTOR**

6.1 STELLENWERT DER PRODUKTION HEUTE

6.2 PRODUKTIONSMANAGEMENT IM WANDEL

6.3 ZUKUNFTSVISION INDUSTRIE 4.0

## KAPITEL E: PRODUKTIONSWIRTSCHAFT

### 6. DIE PRODUKTION ALS WETTBEWERBSFAKTOR

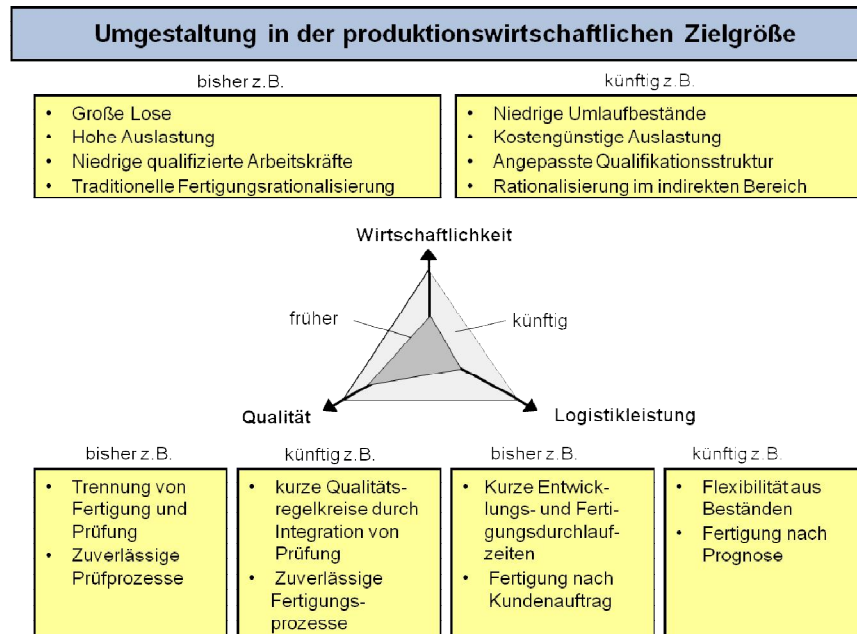

Seite 542, Abb. 75: Veränderungen in der produktionswirtschaftlichen Zielgröße

## KAPITEL E: PRODUKTIONSWIRTSCHAFT

### 6. DIE PRODUKTION ALS WETTBEWERBSFAKTOR

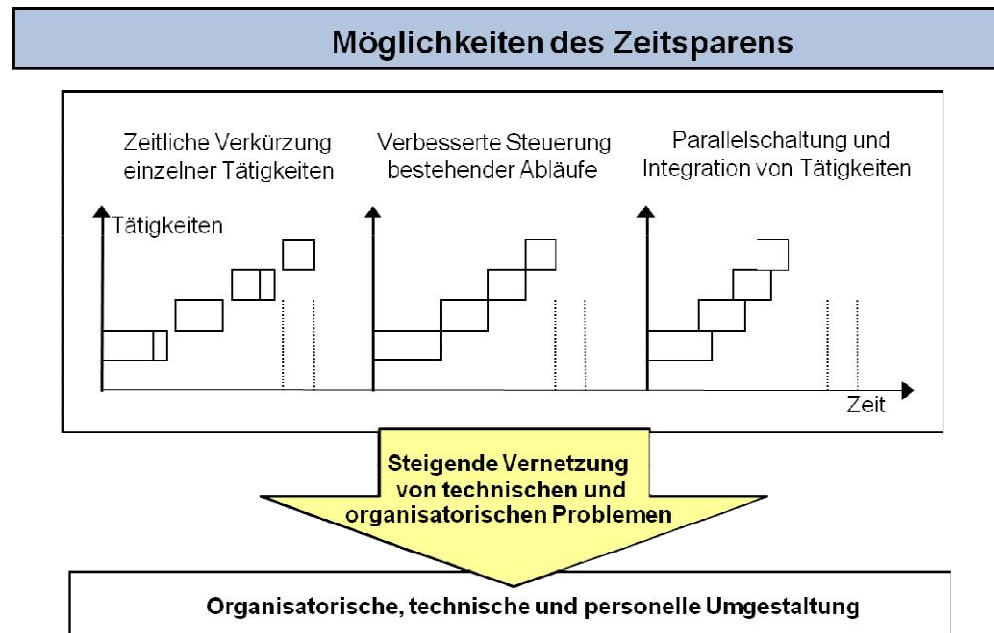

Seite 544, Abb. 76: Grundsätzliche Möglichkeiten des Zeitsparens

## KAPITEL E: PRODUKTIONSWIRTSCHAFT

### 6. DIE PRODUKTION ALS WETTBEWERBSFAKTOR

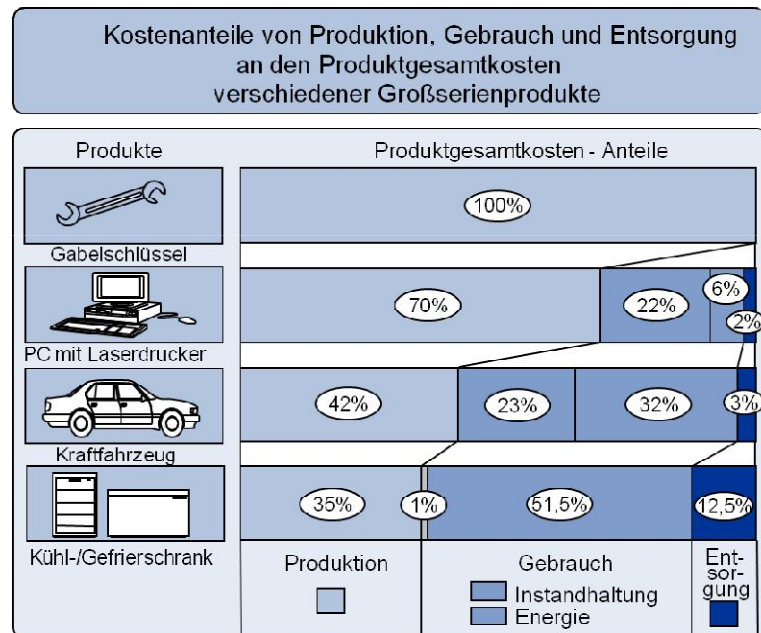

Seite 546, Abb. 77: Entsorgungs- und Produktgesamtkosten  
(Vgl. Steinhilper, R.: Produktionsmanager in der Umweltverantwortung, Düsseldorf 1991, S.27)

## KAPITEL E: PRODUKTIONSWIRTSCHAFT

### 6. DIE PRODUKTION ALS WETTBEWERBSFAKTOR

#### Leitsätze für das Produktionsmanagement

- Vom Abteilungsmanagement zum Prozessmanagement
- Von der Funktionsorientierung zur Objektorientierung
- Von der Aufgabenorientierung zur Problemorientierung
- Von der Mikrobetrachtung zur Makrobetrachtung
- Vom externen marktwirtschaftlichen Denken zur internen marktwirtschaftlichen Ausrichtung
- Von der Tätigkeitsplanung zur Ausrichtung
- Von der Mechanisierung zur Flexibilisierung
- Von der Fachkompetenz zur Methoden- und Sozialkompetenz
- Von der passiven Aufgabenerfüllung zur aktiven Mitgestaltung
- Vom Unternehmensegoismus zur gesellschaftlichen Verantwortung

Seite 548, Abb. 78: Paradigmenwechsel im Produktionsmanagement

## KAPITEL E: PRODUKTIONSWIRTSCHAFT

### 6. DIE PRODUKTION ALS WETTBEWERBSFAKTOR

| Phasen der industriellen (R)Evolution                                                                              |                                                                                                                   |                                                                                                              |                                                                           |
|--------------------------------------------------------------------------------------------------------------------|-------------------------------------------------------------------------------------------------------------------|--------------------------------------------------------------------------------------------------------------|---------------------------------------------------------------------------|
| Industrie 1.0                                                                                                      | Industrie 2.0                                                                                                     | Industrie 3.0                                                                                                | Industrie 4.0                                                             |
| Ende 18. Jhdt.                                                                                                     | Beginn 20. Jhdt.                                                                                                  | Beginn der 70er Jahre, 20. Jhdt.                                                                             | Heute 21. Jhdt.                                                           |
| Industrielle Revolution durch: die Einführung mechanischer Produktionsanlagen mit Hilfe von Wasser- und Dampfkraft | Industrielle Revolution durch: die Einführung arbeitsteiliger Massenproduktion mit Hilfe von elektrischer Energie | Industrielle Revolution durch: den Einsatz von Elektronik und IT zur weiteren Automatisierung der Produktion | Industrielle Revolution auf der Basis von Cyber-Physischen Systemen (CPS) |
| Zunehmender Grad der Komplexität                                                                                   |                                                                                                                   |                                                                                                              |                                                                           |
|                                |                                                                                                                   |                                                                                                              |                                                                           |

Seite 549, Abb. 79: Paradigmenwechsel im Produktionsprozess  
 (Vgl. hierzu die ausführliche Studie des Fraunhofer-Instituts für Arbeitswirtschaft und Produktion (IAO):  
 Studie Produktionsarbeit der Zukunft - Industrie 4.0, Stuttgart 2013 und Kempermann, H.: Industrie 4.0,  
Köln 2015)

Jung: Allgemeine Betriebswirtschaftslehre. De Gruyter Oldenbourg 2016. ISBN 978-3-486-76376-8
