# Supplementary material
Source: publisher site journal article supplement (https://www.degruyterbrill.com/publication/isbn/9783486989434/downloadAsset/9783486989434_Folien--de.zip)
Supplement: Supplementary file 6 [file Teil_F_ABWL.pdf › Teil_F_ABWL.pdf]

# ZUSATZMATERIALIEN ALLGEMEINE BETRIEBSWIRTSCHAFTSLEHRE

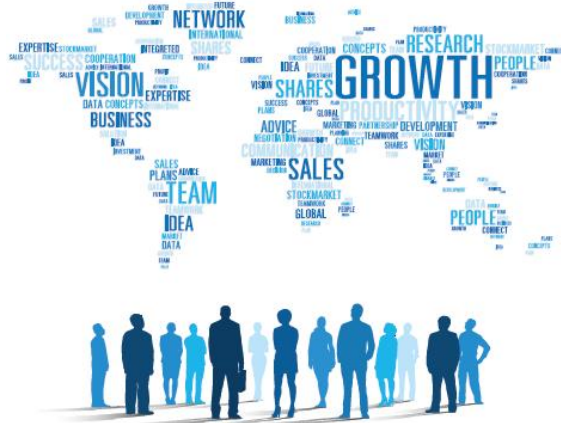

## KAPITEL F: ABSATZ UND MARKETING

1. GRUNDLAGEN DES MARKETING UND DER MARKETINGPLANUNG
2. INFORMATIONSGEWINNUNG IM MARKETING
3. DAS ABSATZPOLITISCHE INSTRUMENTARIUM
4. DIE INTEGRATION DER MARKETING-INSTRUMENTE ZUM MARKETING-MIX
5. INSTITUTIONELLE BESONDERHEITEN DES MARKETING
6. AUSBLICK UND KÜNFTIGE ENTWICKLUNG DES MARKETING

# **1. GRUNDLAGEN DES MARKETING UND DER MARKETINGPLANUNG**

1.1 BEGRIFF UND WESEN DES MARKETING

1.2 DAS MARKETING-MANAGEMENT-KONZEPT

1.3 MARKT – ABGRENZUNGEN UND FUNKTIONEN

1.4 MARKETING-PLANUNG

1.5 MARKETING-ZIELE

1.6 MARKETING-STRATEGIEN

1.7 MARKETING-ORGANISATION

## KAPITEL F: ABSATZ UND MARKETING

### 1. GRUNDLAGEN DES MARKETING UND DER MARKETINGPLANUNG

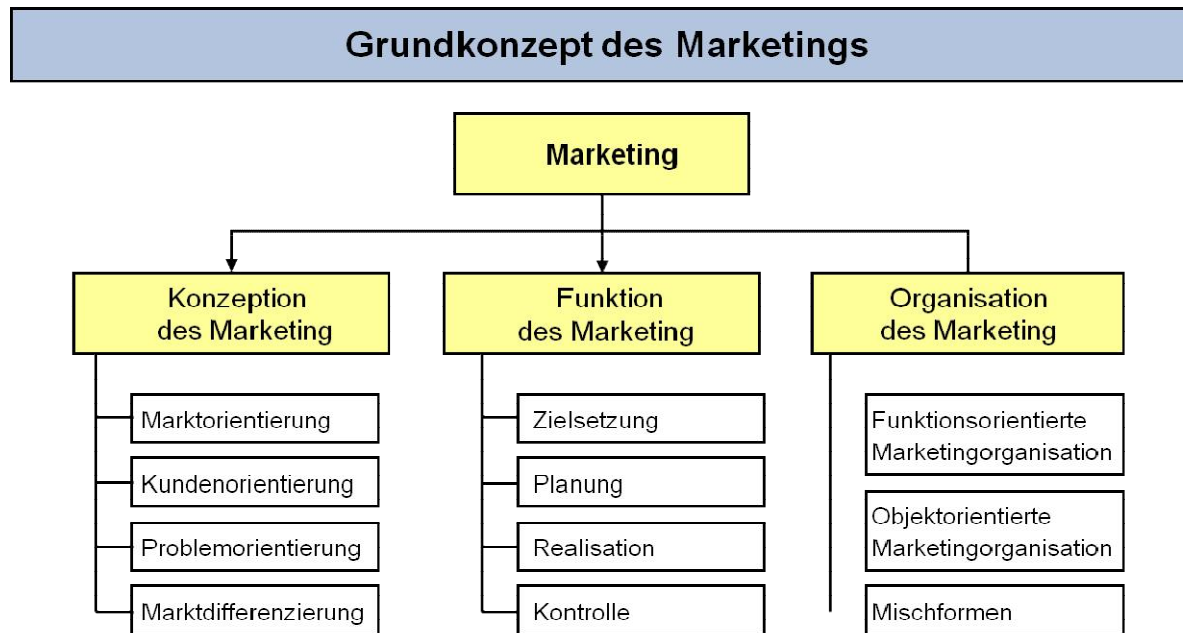

Seite 557, Abb. 1: Das Grundkonzept des Marketing  
(Vgl. Weis H.-C.: Marketing, 17. Aufl., Herne 2015, S. 21 ff)

## KAPITEL F: ABSATZ UND MARKETING

### 1. GRUNDLAGEN DES MARKETING UND DER MARKETINGPLANUNG

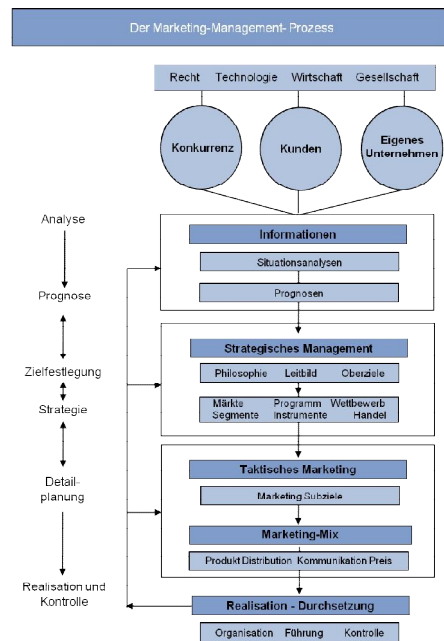

Seite 560, Abb. 2: Der Marketing-Management-Prozess  
(Vgl. Kotler, P. / Bliemel, F.: Marketing- Management, 10. Aufl., Stuttgart 2001, S.19 ff)

## KAPITEL F: ABSATZ UND MARKETING

### 1. GRUNDLAGEN DES MARKETING UND DER MARKETINGPLANUNG

| <div>Anbieter</div> <div>Nachfrager</div> | ein großer           | wenig mittelgroße     | viele kleine          |
|-------------------------------------------|----------------------|-----------------------|-----------------------|
| ein großer                                | Bilaterales Monopol  | Beschränktes Monopson | Monopson              |
| wenig mittelgroße                         | Beschränktes Monopol | Bilaterales Oligopol  | Olygopson             |
| viele kleine                              | Monopol              | Oligopol              | (Bilaterales) Polypol |

Seite 562, Abb. 3: Marktformenschema

## KAPITEL F: ABSATZ UND MARKETING

### 1. GRUNDLAGEN DES MARKETING UND DER MARKETINGPLANUNG

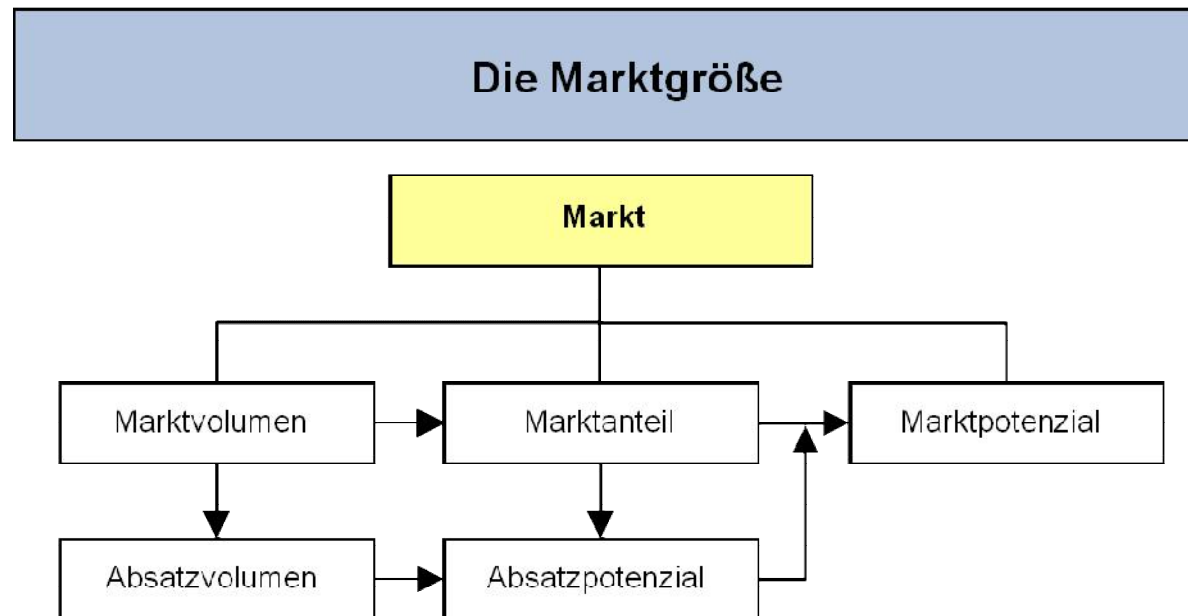

Seite 563, Abb. 4: Die Marktgrößen

## KAPITEL F: ABSATZ UND MARKETING

### 1. GRUNDLAGEN DES MARKETING UND DER MARKETINGPLANUNG

$$\text{Marktanteil} = \frac{\text{Absatzvolumen}}{\text{Marktvolumen}} \cdot 100\%$$

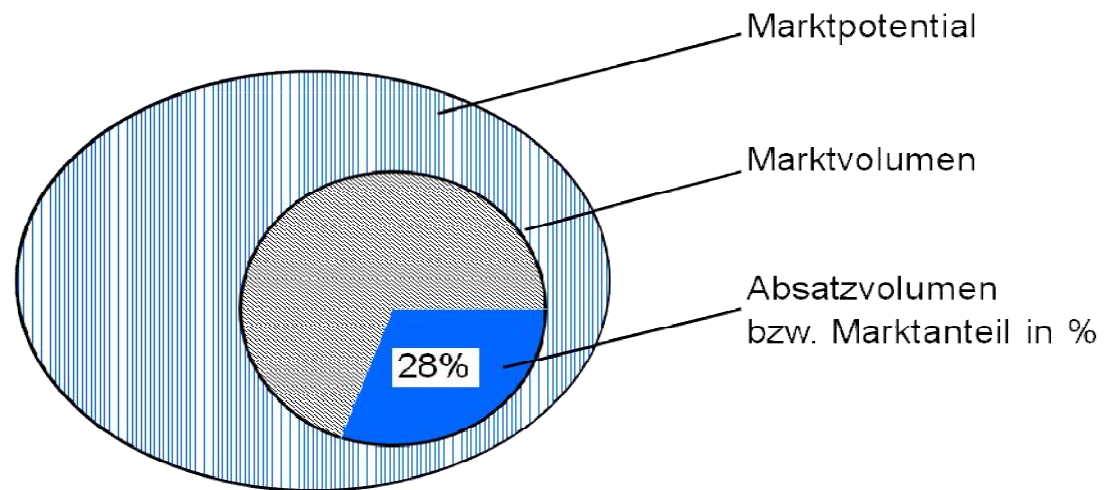

Seite 565, Abb. 5: Marktpotenzial, Marktvolumen, Absatzvolumen



## KAPITEL F: ABSATZ UND MARKETING

### 1. GRUNDLAGEN DES MARKETING UND DER MARKETINGPLANUNG

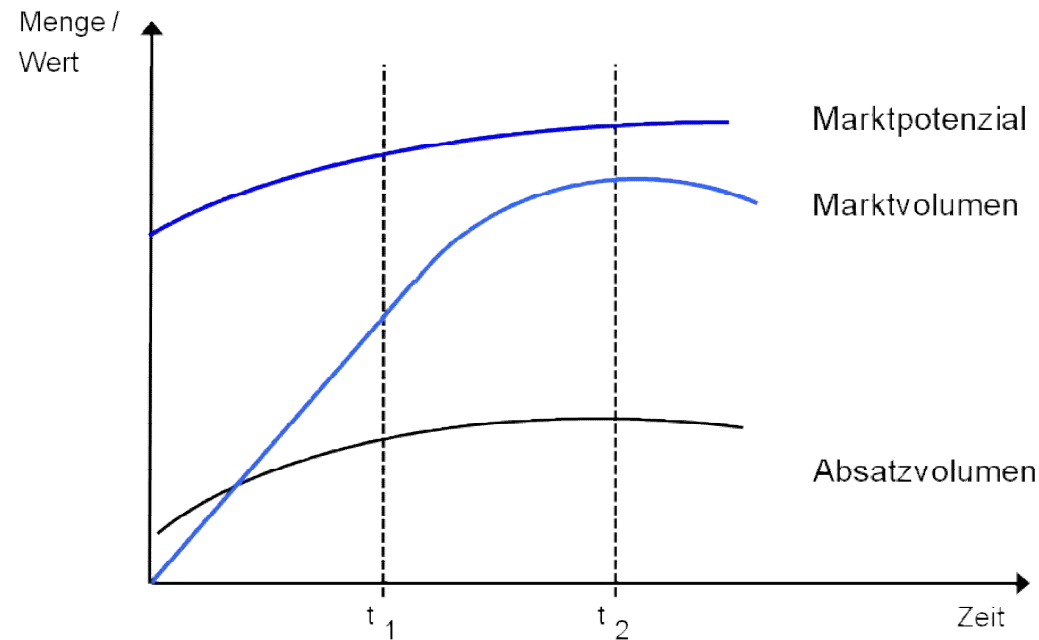

Seite 565, Abb. 6: Entwicklung von Marktpotenzial, Marktvolumen und Absatzvolumen

## KAPITEL F: ABSATZ UND MARKETING

### 1. GRUNDLAGEN DES MARKETING UND DER MARKETINGPLANUNG

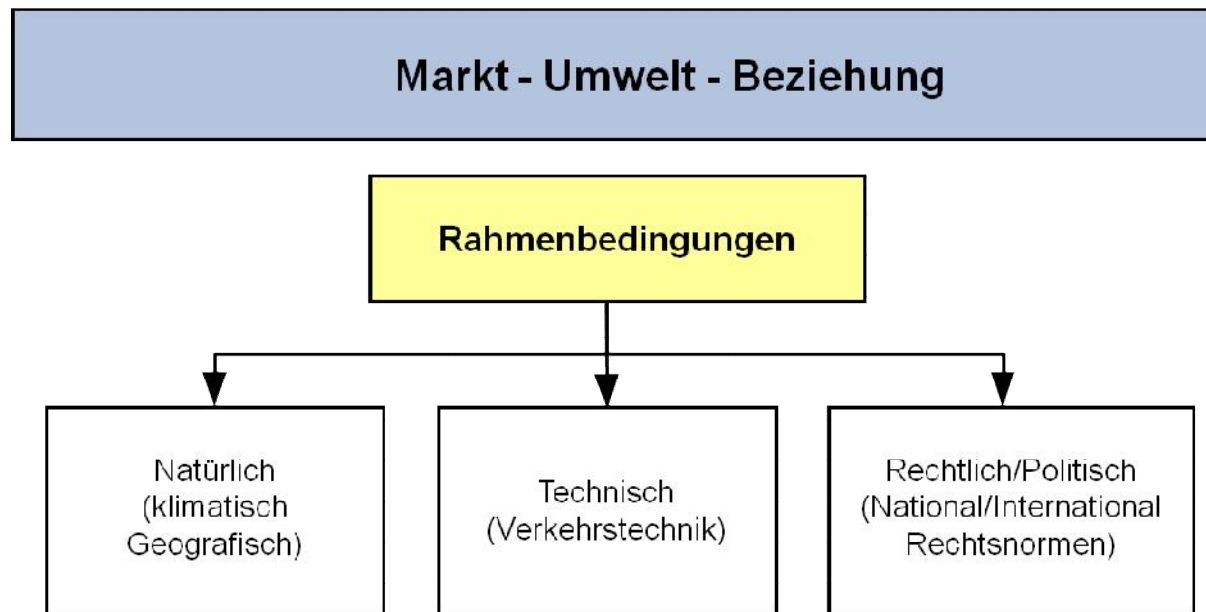

Seite 567, Abb. 7: Markt-Umwelt-Beziehungen

## KAPITEL F: ABSATZ UND MARKETING

### 1. GRUNDLAGEN DES MARKETING UND DER MARKETINGPLANUNG

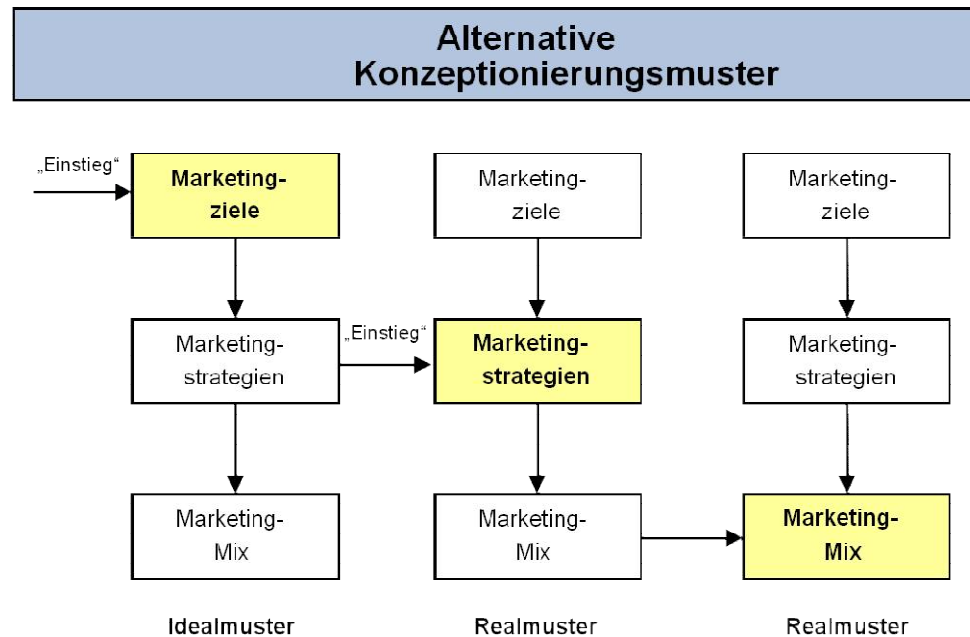

Seite 571, Abb. 8: Alternative Konzeptionierungsmuster (Reihenfolgealternativen)  
(Vgl. Becker, J.: Marketing-Konzeption: Grundlagen des strategischen und operativen  
Marketing-Managements, 6. Aufl., München 1998, S. 4)

*Jung: Allgemeine Betriebswirtschaftslehre. De Gruyter Oldenbourg 2016. ISBN 978-3-486-76376-8*

## KAPITEL F: ABSATZ UND MARKETING

### 1. GRUNDLAGEN DES MARKETING UND DER MARKETINGPLANUNG

| Marketingplan für Produkt XY                                                                                                                                                                                                                                                                                                                                                                                                                                                                                                                                                                                                                                                                                                                                                                                                                                                                                                                                                                  |
|-----------------------------------------------------------------------------------------------------------------------------------------------------------------------------------------------------------------------------------------------------------------------------------------------------------------------------------------------------------------------------------------------------------------------------------------------------------------------------------------------------------------------------------------------------------------------------------------------------------------------------------------------------------------------------------------------------------------------------------------------------------------------------------------------------------------------------------------------------------------------------------------------------------------------------------------------------------------------------------------------|
| <ul style="list-style-type: none"> <li>• <b>Übersichtliche Zusammenfassung der wichtigsten Ergebnisse zur schnellen Information der Geschäftsleitung</b></li> <li>• <b>Darstellung der Marktsituation (Hintergrunddaten über Produkt, Konkurrenz, etc.):</b> <ul style="list-style-type: none"> <li>• gegenwärtige Situation des Gesamtmarktes und voraussichtliche Entwicklung</li> <li>• Stärken und Schwächen des eigenen Unternehmens</li> <li>• Bewertung und Analyse der Chancen und Probleme</li> </ul> </li> <li>• <b>Zielsetzung:</b> <ul style="list-style-type: none"> <li>• Unternehmensziele</li> <li>• Marketingziele</li> <li>• Strategie</li> </ul> </li> <li>• <b>Realisationsprogramme/Marketingmaßnahmen:</b> <ul style="list-style-type: none"> <li>• Produktpolitik</li> <li>• Kontrahierungspolitik</li> <li>• Distributionspolitik</li> <li>• Kommunikationspolitik</li> </ul> </li> <li>• <b>Kostenentwicklung</b></li> <li>• <b>Kontrollmöglichkeiten</b></li> </ul> |

Seite 572, Abb. 9: Marketingplan

## KAPITEL F: ABSATZ UND MARKETING

### 1. GRUNDLAGEN DES MARKETING UND DER MARKETINGPLANUNG

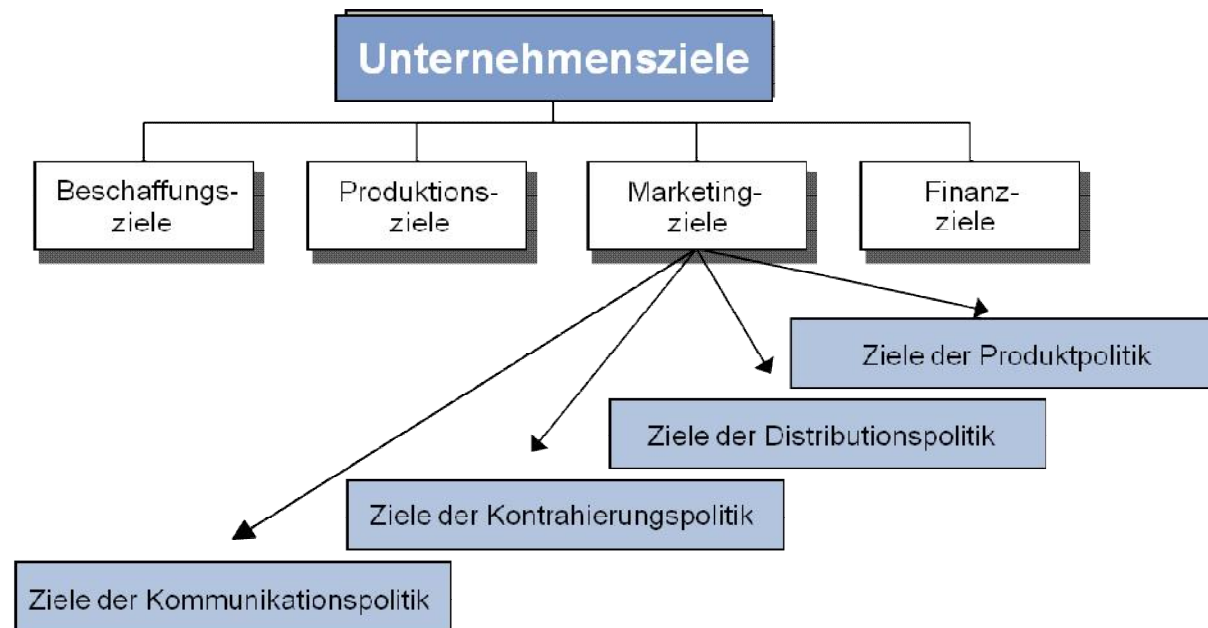

Seite 572, Abb. 10: Die Ableitung der Marketing-Ziele aus den Unternehmenszielen

## KAPITEL F: ABSATZ UND MARKETING

### 1. GRUNDLAGEN DES MARKETING UND DER MARKETINGPLANUNG

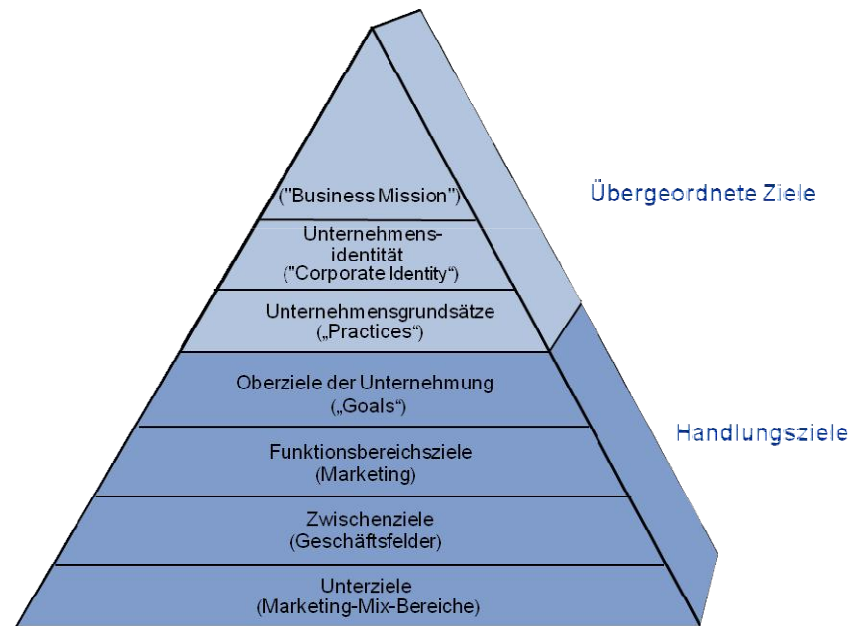

Seite 573, Abb. 11: Zielebenen der Unternehmung

## KAPITEL F: ABSATZ UND MARKETING

### 1. GRUNDLAGEN DES MARKETING UND DER MARKETINGPLANUNG

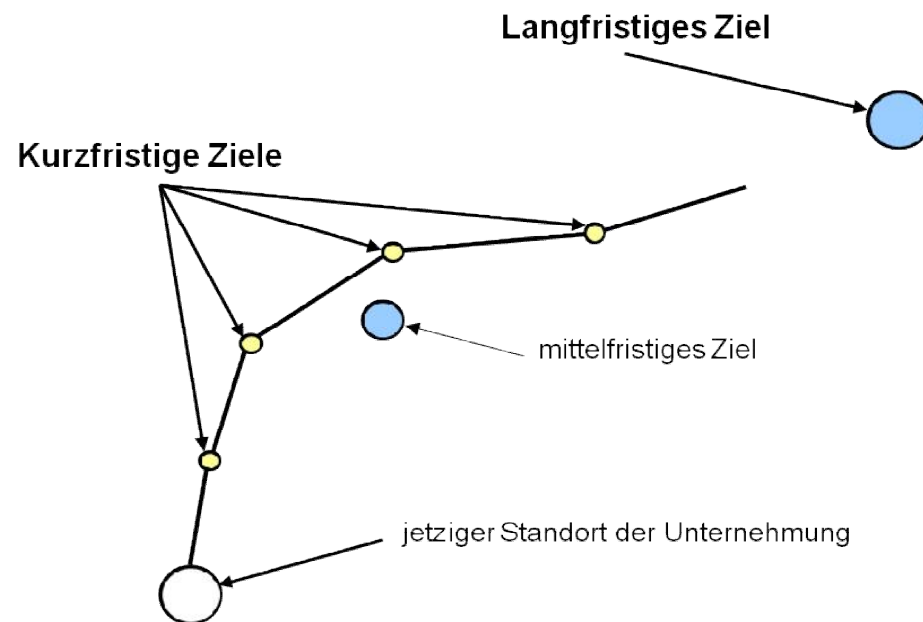

Seite 574, Abb. 12: Beziehungen zwischen kurz-, mittel- und langfristigen Zielen  
(Vgl. Becker J.: Marketing-Konzeption: Grundlagen des strategischen und operativen Marketing-Managements, 6. Aufl., München 1998, S. 60 ff)

*Jung: Allgemeine Betriebswirtschaftslehre. De Gruyter Oldenbourg 2016. ISBN 978-3-486-76376-8*

## KAPITEL F: ABSATZ UND MARKETING

### 1. GRUNDLAGEN DES MARKETING UND DER MARKETINGPLANUNG

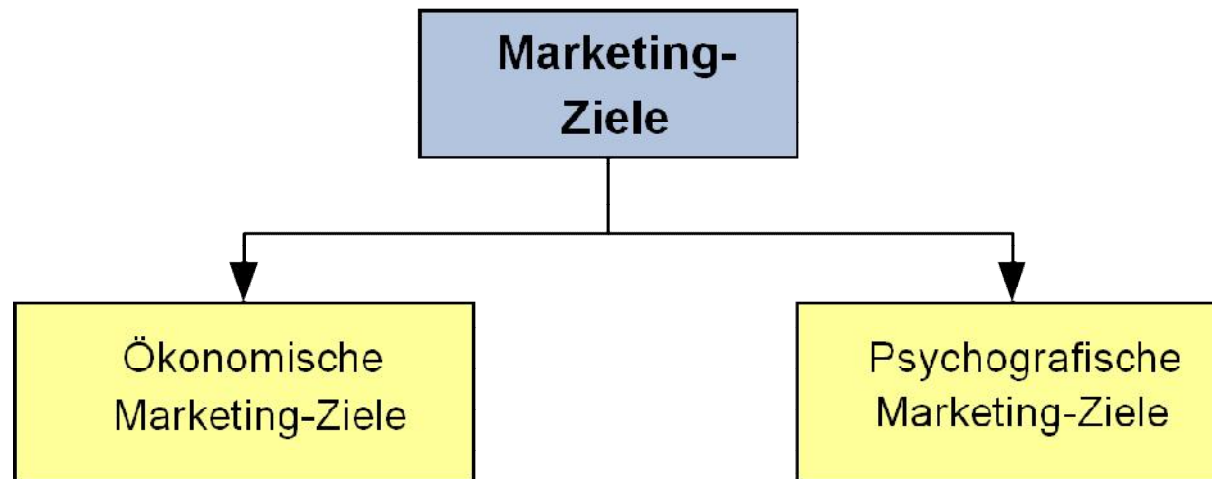

Seite 574, Abb. 13: Ökonomische und psychografische Ziele



## KAPITEL F: ABSATZ UND MARKETING

### 1. GRUNDLAGEN DES MARKETING UND DER MARKETINGPLANUNG

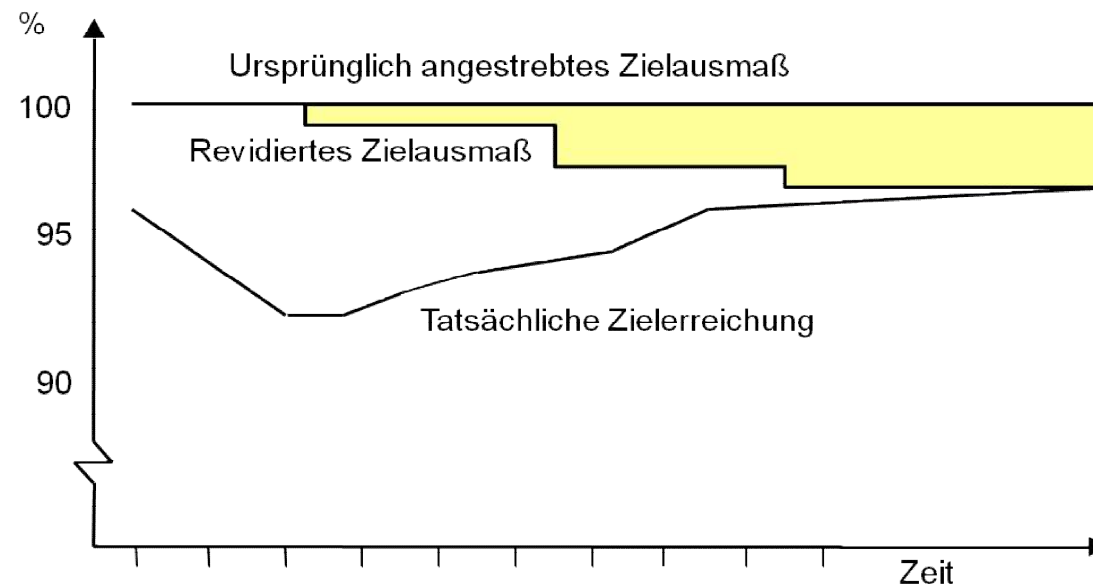

Seite 576, Abb. 14: Die Revision der Zielsetzung in Abhängigkeit von der Zielerreichung (Vgl. Becker, J.: Marketing-Konzeption : Grundlagen des strategischen und operativen Marketing-Managements, 6.Aufl., München 1998, S. 129)

Jung: Allgemeine Betriebswirtschaftslehre. De Gruyter Oldenbourg 2016. ISBN 978-3-486-76376-8

## KAPITEL F: ABSATZ UND MARKETING

### 1. GRUNDLAGEN DES MARKETING UND DER MARKETINGPLANUNG

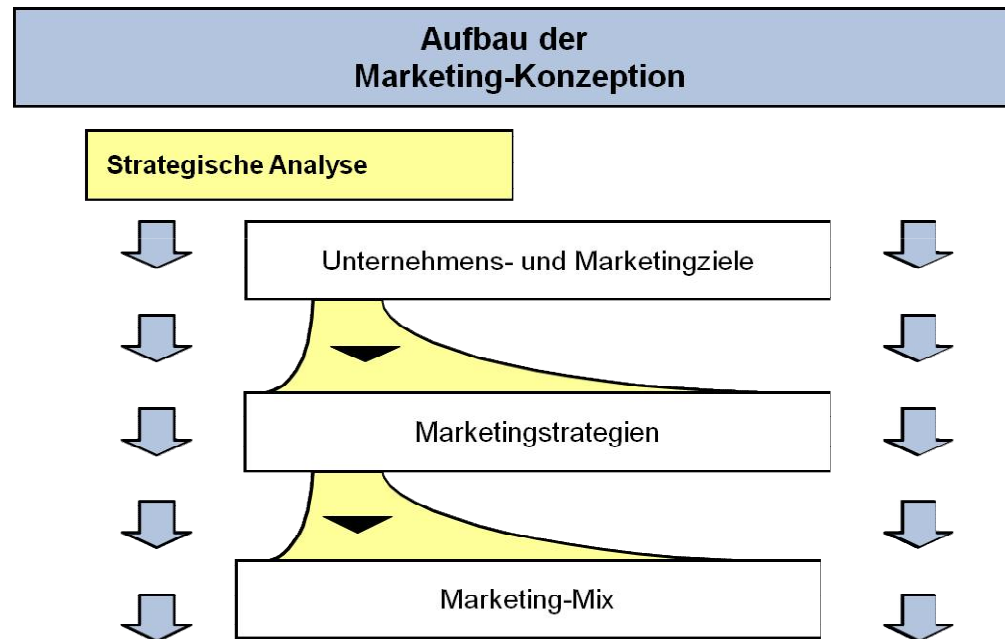

Seite 577, Abb. 15: Aufbau der Marketing-Konzeption

## KAPITEL F: ABSATZ UND MARKETING

### 1. GRUNDLAGEN DES MARKETING UND DER MARKETINGPLANUNG

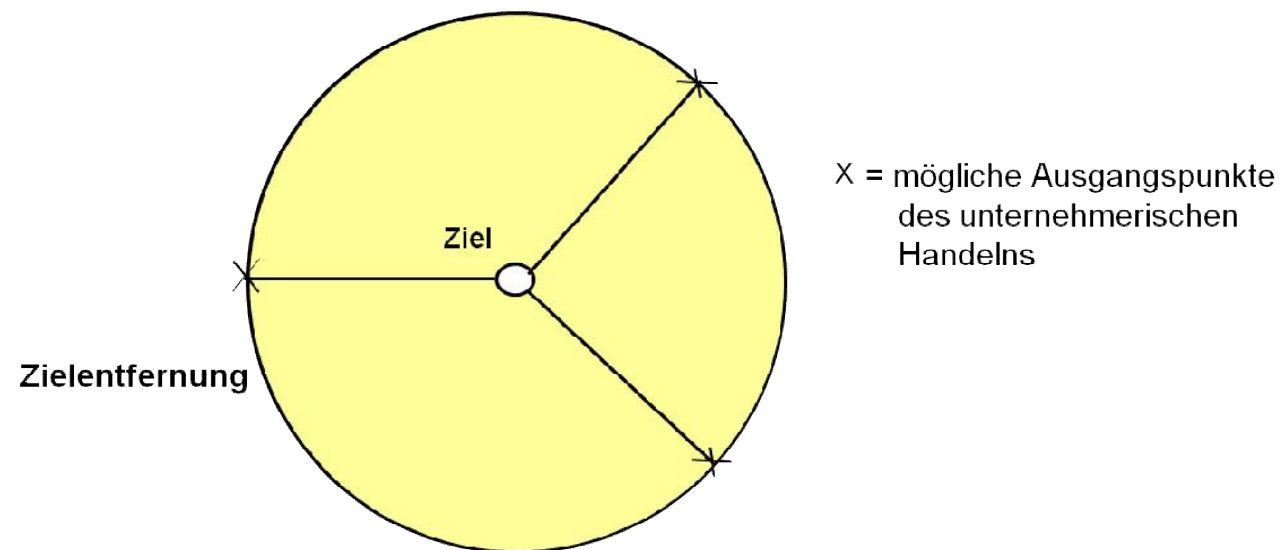

Seite 578, Abb. 16: Die unternehmerische Ausgangslage  
(Vgl. Becker, J.: Marketing-Konzeption : Grundlagen des strategischen und operativen Marketing-Managements, 6.Aufl., München 1998, S. 141)

*Jung: Allgemeine Betriebswirtschaftslehre. De Gruyter Oldenbourg 2016. ISBN 978-3-486-76376-8*

## KAPITEL F: ABSATZ UND MARKETING

### 1. GRUNDLAGEN DES MARKETING UND DER MARKETINGPLANUNG

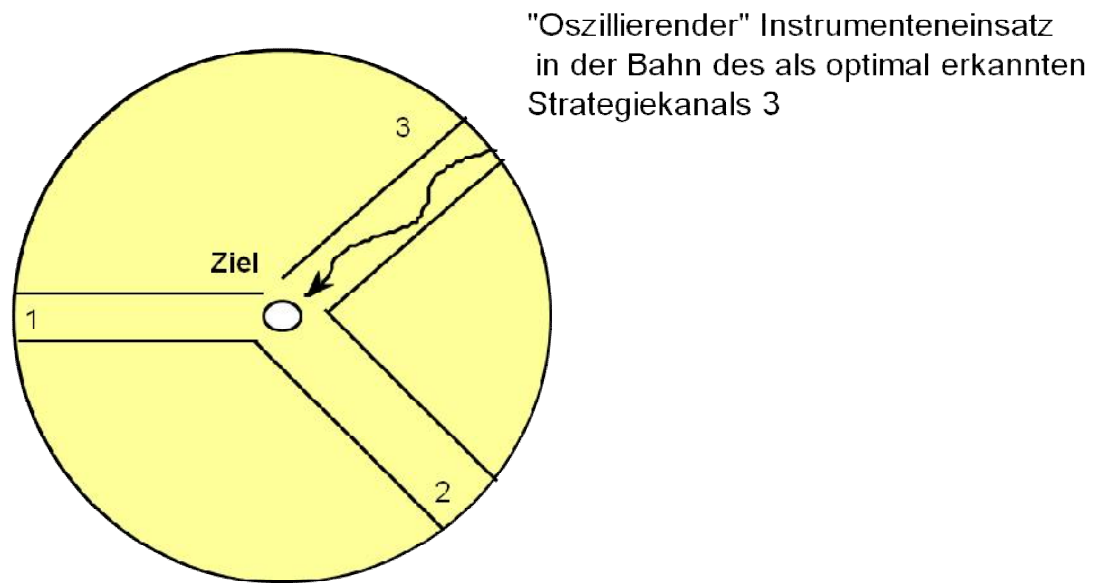

Seite 578, Abb. 17: Die Lenkungsleistung von Strategien  
(Vgl. Becker, J.: Marketing-Konzeption : Grundlagen des strategischen und operativen  
Marketing-Managements, 6.Aufl., München 1998, S. 142)

*Jung: Allgemeine Betriebswirtschaftslehre. De Gruyter Oldenbourg 2016. ISBN 978-3-486-76376-8*

## KAPITEL F: ABSATZ UND MARKETING

### 1. GRUNDLAGEN DES MARKETING UND DER MARKETINGPLANUNG

| Strategieebenen                         | Strategiealternativen                                     |                                                             |                                                              |                                                                |                                                      |                                                      |                                                |  |
|-----------------------------------------|-----------------------------------------------------------|-------------------------------------------------------------|--------------------------------------------------------------|----------------------------------------------------------------|------------------------------------------------------|------------------------------------------------------|------------------------------------------------|--|
| <b>1. Marktfeldstrategien</b>           | Marktdurchdringungsstrategie<br><input type="checkbox"/>  | Marktentwicklungsstrategie<br><input type="checkbox"/>      | Produktentwicklungsstrategie<br><input type="checkbox"/>     | Diversifikationsstrategie<br><input type="checkbox"/>          |                                                      |                                                      |                                                |  |
| <b>2. Marktstimulierungsstrategien</b>  | Präferenzstrategie<br><input type="checkbox"/>            |                                                             | Preis-Mengen-Strategie<br><input type="checkbox"/>           |                                                                |                                                      |                                                      |                                                |  |
| <b>3. Marktparzellierungsstrategien</b> | Massenmarktstrategie (totale)<br><input type="checkbox"/> | Massenmarktstrategie (partiale)<br><input type="checkbox"/> | Segmentierungsstrategie (totale)<br><input type="checkbox"/> | Segmentierungsstrategie (partiale)<br><input type="checkbox"/> |                                                      |                                                      |                                                |  |
| <b>4. Marktarealstrategien</b>          | lokale Strategie<br><input type="checkbox"/>              | regionale Strategie<br><input type="checkbox"/>             | überregion. Strategie<br><input type="checkbox"/>            | nationale Strategie<br><input type="checkbox"/>                | multinationale Strategie<br><input type="checkbox"/> | internationale Strategie<br><input type="checkbox"/> | Weltmarktstrategie<br><input type="checkbox"/> |  |

Seite 580, Abb. 18: Strategieraster/Strategie-Chip  
(Vgl. Becker, J.: Marketing-Konzeption : Grundlagen des strategischen und operativen Marketing-Managements, 6.Aufl., München 1998, S. 352)

Jung: Allgemeine Betriebswirtschaftslehre. De Gruyter Oldenbourg 2016. ISBN 978-3-486-76376-8

## KAPITEL F: ABSATZ UND MARKETING

### 1. GRUNDLAGEN DES MARKETING UND DER MARKETINGPLANUNG

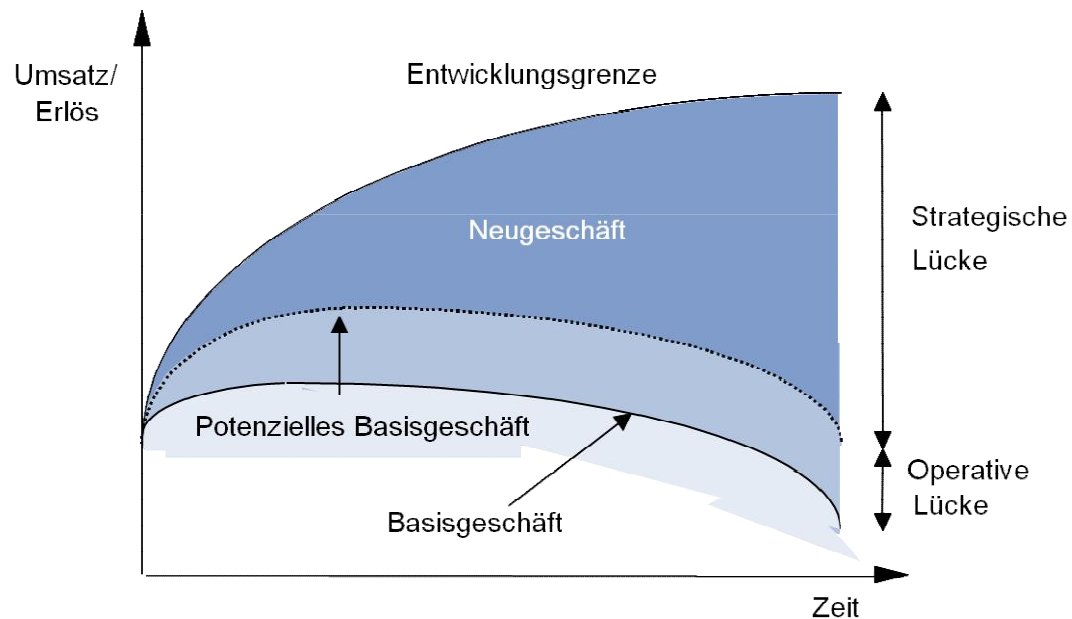

Seite 581, Abb. 19: Beispiel für eine Ziellücke

## KAPITEL F: ABSATZ UND MARKETING

### 1. GRUNDLAGEN DES MARKETING UND DER MARKETINGPLANUNG

| <div> <div>Märkte</div> <div>Produkte<br/>Leistungen</div> </div> | Bestehende                                                                   | Neue                                                                                  |
|-------------------------------------------------------------------|------------------------------------------------------------------------------|---------------------------------------------------------------------------------------|
|                                                                   | <b>Bestehende</b><br><br>Marktdurchdringung<br>Marktbesetzung<br>Verdrängung | <b>Marktentwicklung</b><br><br>Internationalisierung<br>Marktsegmentierung            |
| Neue                                                              | <b>Produktentwicklung</b><br><br>Produktinnovation<br>Produktdifferenzierung | <b>Diversifikation</b><br><br>vertikale<br>horizontale<br>laterale<br>Diversifikation |

Seite 581, Abb. 20: Alternative Marketingstrategien zur Erschließung von Wachstumsquellen (nach Ansoff)

## KAPITEL F: ABSATZ UND MARKETING

### 1. GRUNDLAGEN DES MARKETING UND DER MARKETINGPLANUNG

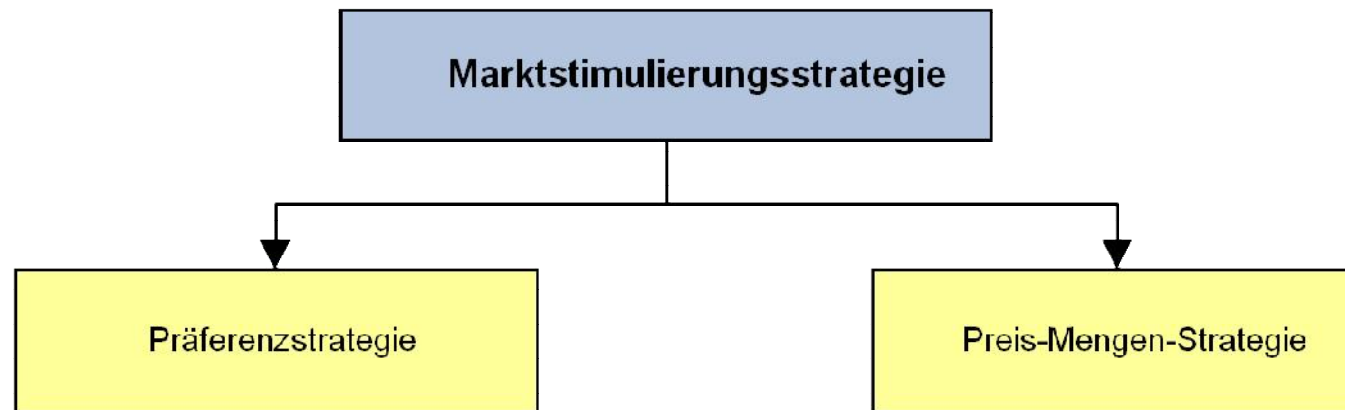

Seite 584, Abb. 21: Marktstimulierungsstrategien



## KAPITEL F: ABSATZ UND MARKETING

### 1. GRUNDLAGEN DES MARKETING UND DER MARKETINGPLANUNG

| <b>Abdeckung des Marktes</b><br><b>Differenzierung des Marketingprogramms</b> | <b>Vollständig (total)</b>               |                                           | <b>Teilweise (partial)</b>         |
|-------------------------------------------------------------------------------|------------------------------------------|-------------------------------------------|------------------------------------|
|                                                                               | <b>Undifferenziert (Massenmarketing)</b> | <b>Differenziert (Marktsegmentierung)</b> |                                    |
|                                                                               | Undifferenziertes Marketing              | Differenziertes Marketing                 | Konzentriertes Marketing           |
|                                                                               |                                          |                                           | Selektiv-differenziertes Marketing |

Seite 585, Abb. 22: Die vier Basisalternativen der Marktparzellierung

## KAPITEL F: ABSATZ UND MARKETING

### 1. GRUNDLAGEN DES MARKETING UND DER MARKETINGPLANUNG

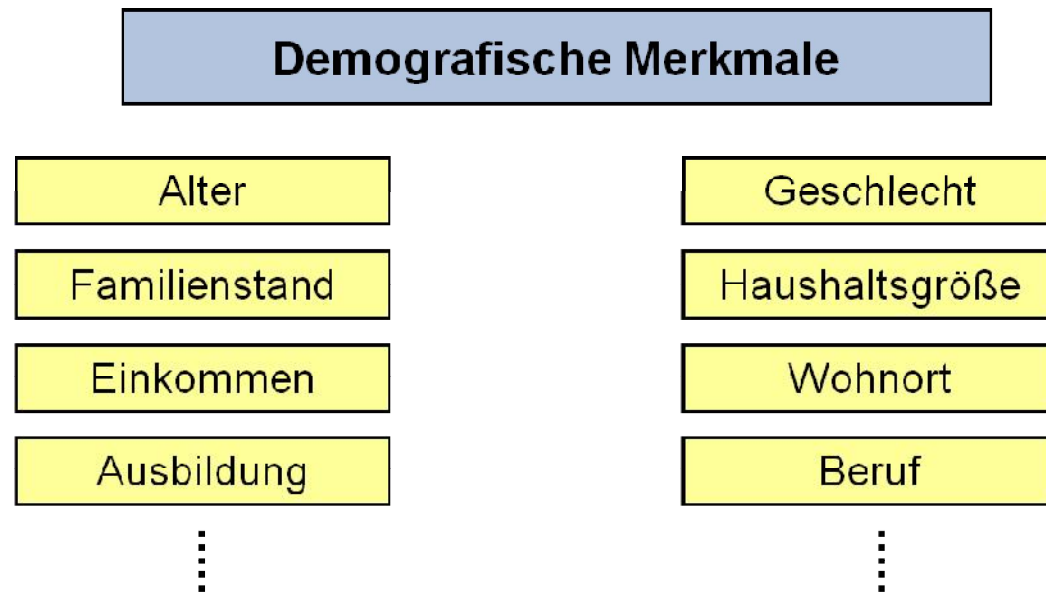

Seite 587, Abb. 23: Demografische Merkmale

## KAPITEL F: ABSATZ UND MARKETING

### 1. GRUNDLAGEN DES MARKETING UND DER MARKETINGPLANUNG

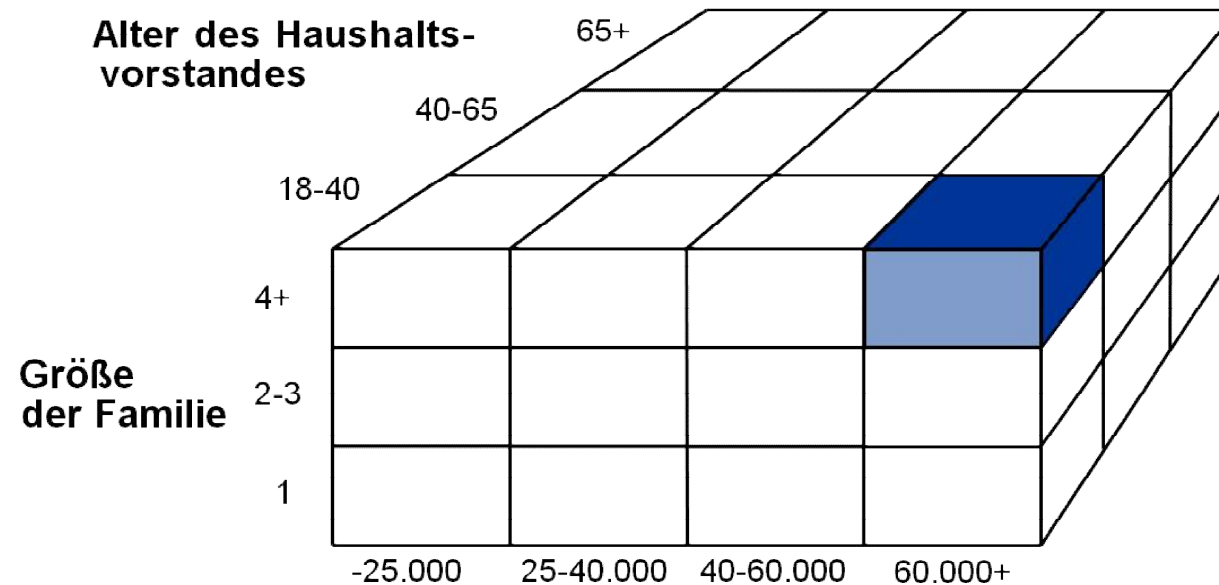

Seite 587, Abb. 24: Beispiel einer Marktsegmentierung nach drei demographischen Merkmalen (Vgl. Becker, J.: Marketing-Konzeption : Grundlagen des strategischen und operativen Marketing-Managements, 6.Aufl., München 1998, S. 254)

*Jung: Allgemeine Betriebswirtschaftslehre. De Gruyter Oldenbourg 2016. ISBN 978-3-486-76376-8*

## KAPITEL F: ABSATZ UND MARKETING

### 1. GRUNDLAGEN DES MARKETING UND DER MARKETINGPLANUNG

#### Psychografische Merkmale

Allgemeine Persönlichkeitsmerkmale

Einstellung und Nutzenerwerb (**benefits**)

Lebensstil bzw. Lebensgewohnheiten (**life style**)

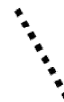

Seite 587, Abb. 25: Psychografische Merkmale

## KAPITEL F: ABSATZ UND MARKETING

### 1. GRUNDLAGEN DES MARKETING UND DER MARKETINGPLANUNG

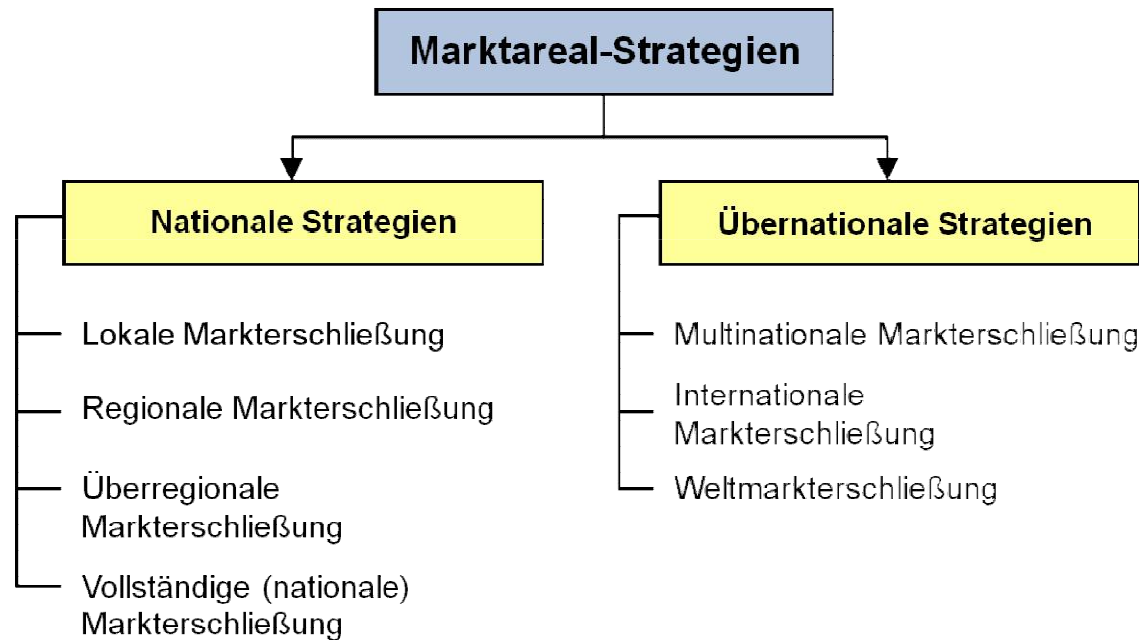

Seite 589, Abb. 26: Marktareal-Strategien

Vgl. Becker, J.: Marketing-Konzeption : Grundlagen des strategischen und operativen Marketing-Managements, 6.Aufl., München 1998, S. 300)

Jung: Allgemeine Betriebswirtschaftslehre. De Gruyter Oldenbourg 2016. ISBN 978-3-486-76376-8

## KAPITEL F: ABSATZ UND MARKETING

### 1. GRUNDLAGEN DES MARKETING UND DER MARKETINGPLANUNG

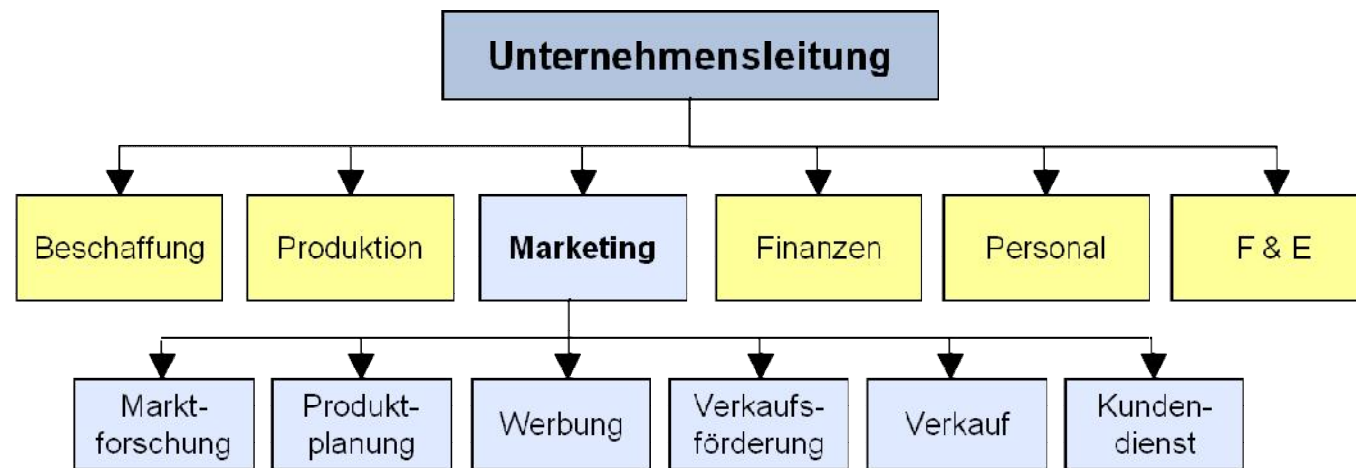

Seite 592, Abb. 27: Funktionsorientierte Marketing-Organisation

## KAPITEL F: ABSATZ UND MARKETING

### 1. GRUNDLAGEN DES MARKETING UND DER MARKETINGPLANUNG

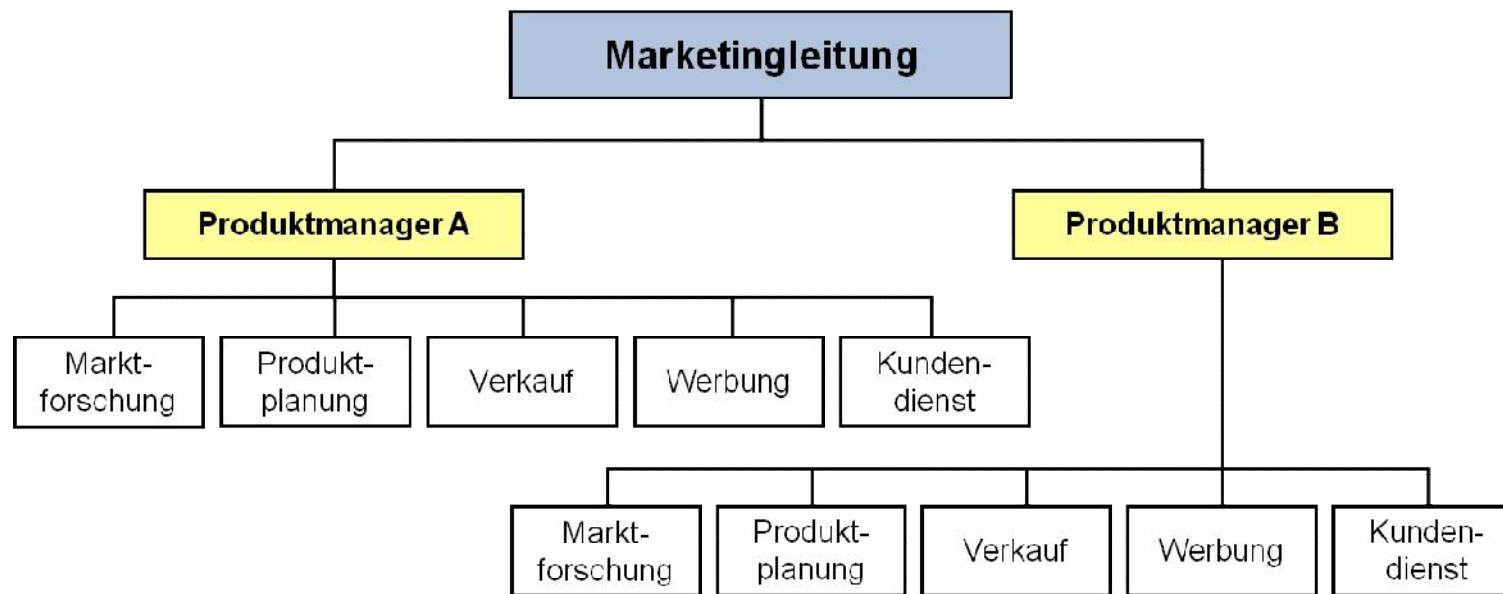

Seite 592, Abb. 28: Produktorientierte Marketing-Organisation

## KAPITEL F: ABSATZ UND MARKETING

### 1. GRUNDLAGEN DES MARKETING UND DER MARKETINGPLANUNG

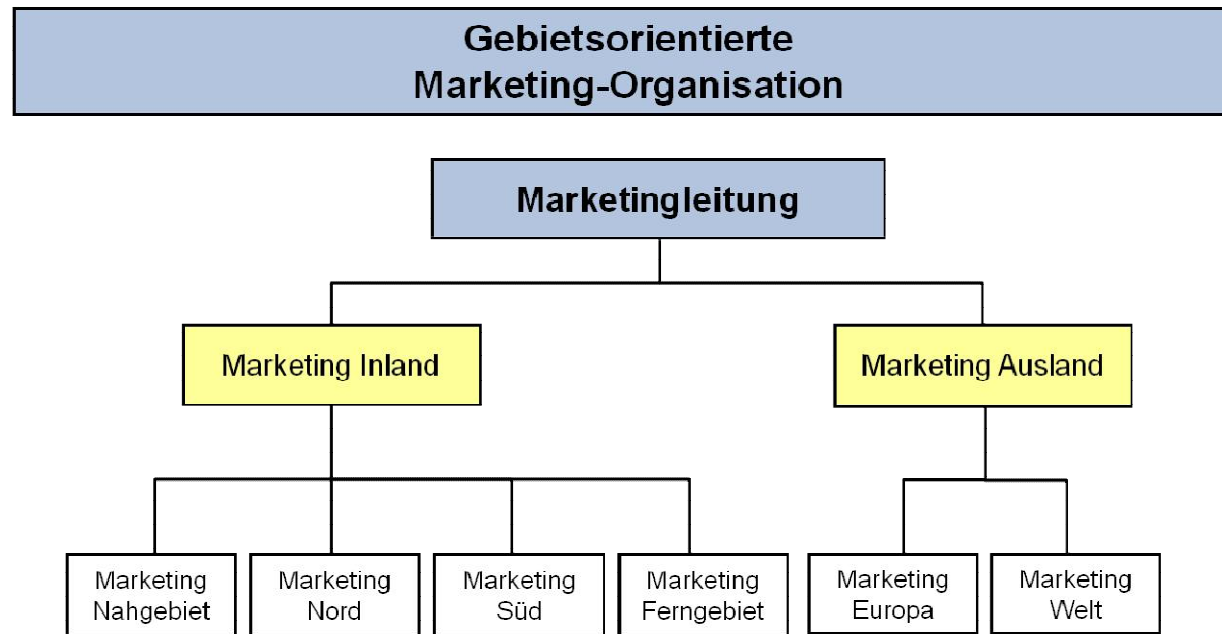

Seite 593, Abb. 29: Gebietsorientierte Marketing-Organisation



## KAPITEL F: ABSATZ UND MARKETING

### Die kundenorientierte Marketing-Organisation mit der Marketingleitung als Stabsstelle

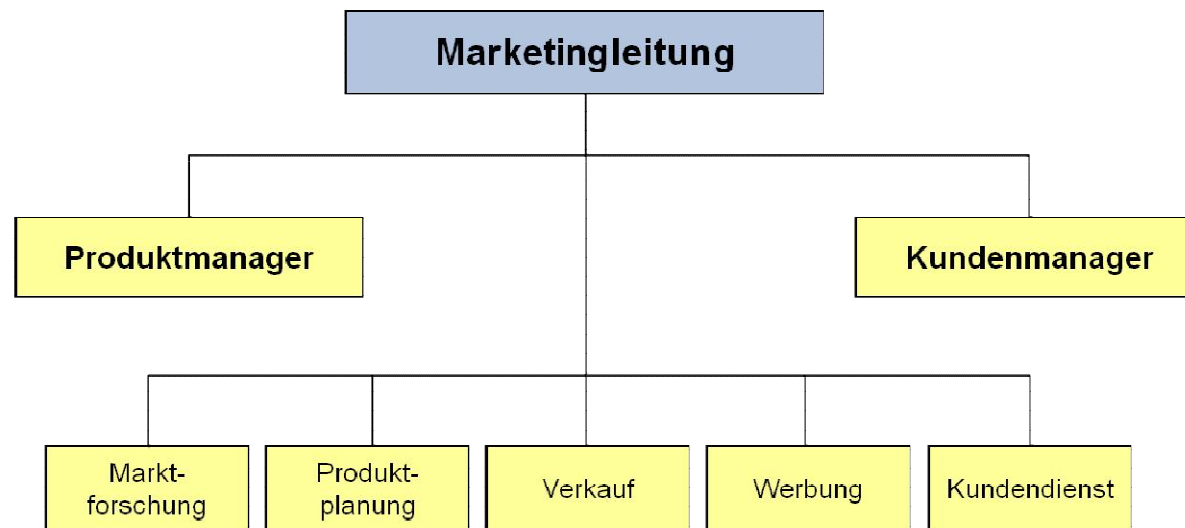

Seite 593, Abb. 30: Der Kundenmanager als Stabsstelle der Marketingleitung

## KAPITEL F: ABSATZ UND MARKETING

### 1. GRUNDLAGEN DES MARKETING UND DER MARKETINGPLANUNG

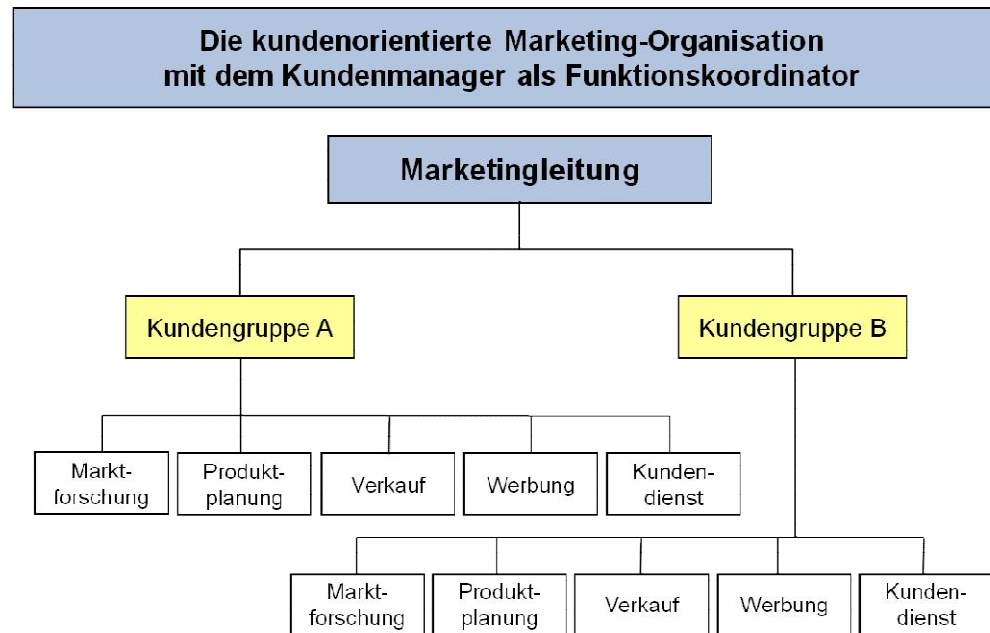

Seite 594, Abb. 31: Die kundenorientierte Marketing-Organisation mit dem Kundenmanager als Funktionskoordinator

(Vgl. Weis H.-C.: Marketing, 17. Aufl., Herne 2015, S. 110 ff)

Jung: Allgemeine Betriebswirtschaftslehre. De Gruyter Oldenbourg 2016. ISBN 978-3-486-76376-8

## KAPITEL F: ABSATZ UND MARKETING

### 1. GRUNDLAGEN DES MARKETING UND DER MARKETINGPLANUNG

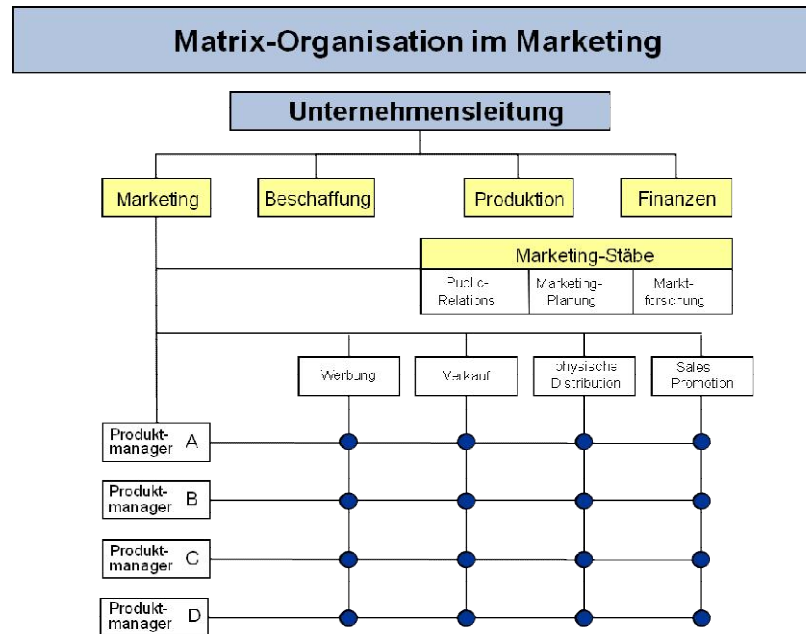

Seite 595, Abb. 32: Die Matrix-Organisation im Marketing

## **2. INFORMATIONSGEWINNUNG IM MARKETING**

2.1 INFORMATIONSBESCHAFFUNGSPROZESS

2.2 FORMEN DER MARKTFORSCHUNG

2.3 AUSWERTUNG UND INTERPRETATION DER MARKTFORSCHUNGSERGEBNISSE

2.4 ERKLÄRUNGSANSÄTZE DES KÄUFERVERHALTENS

## KAPITEL F: ABSATZ UND MARKETING

### 2. INFORMATIONSGEWINNUNG IM MARKETING

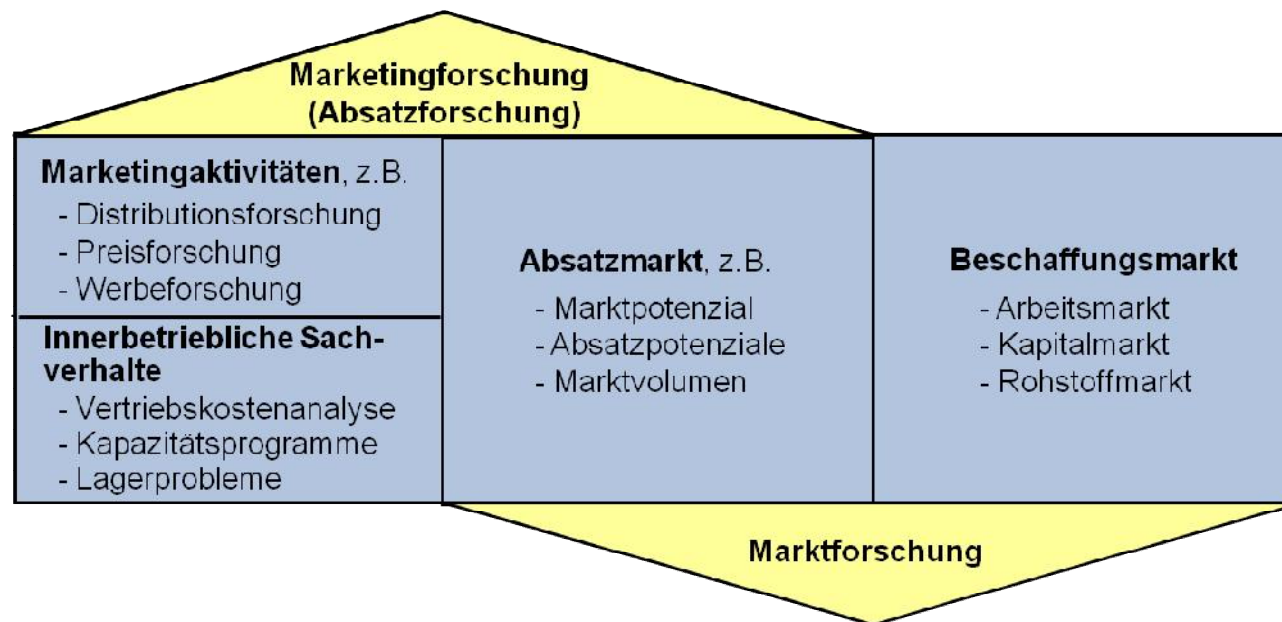

Seite 597, Abb. 33: Zur Abgrenzung zwischen Marketingforschung und Marktforschung

## KAPITEL F: ABSATZ UND MARKETING

### 2. INFORMATIONSGEWINNUNG IM MARKETING

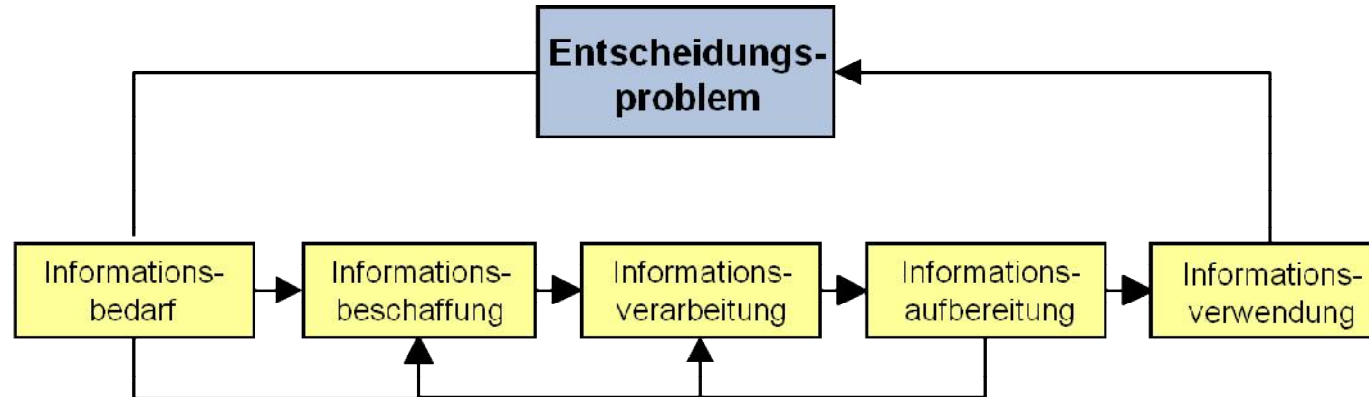

Seite 598, Abb. 34: Der Informationsbeschaffungs-Prozess

## KAPITEL F: ABSATZ UND MARKETING

### 2. INFORMATIONSGEWINNUNG IM MARKETING

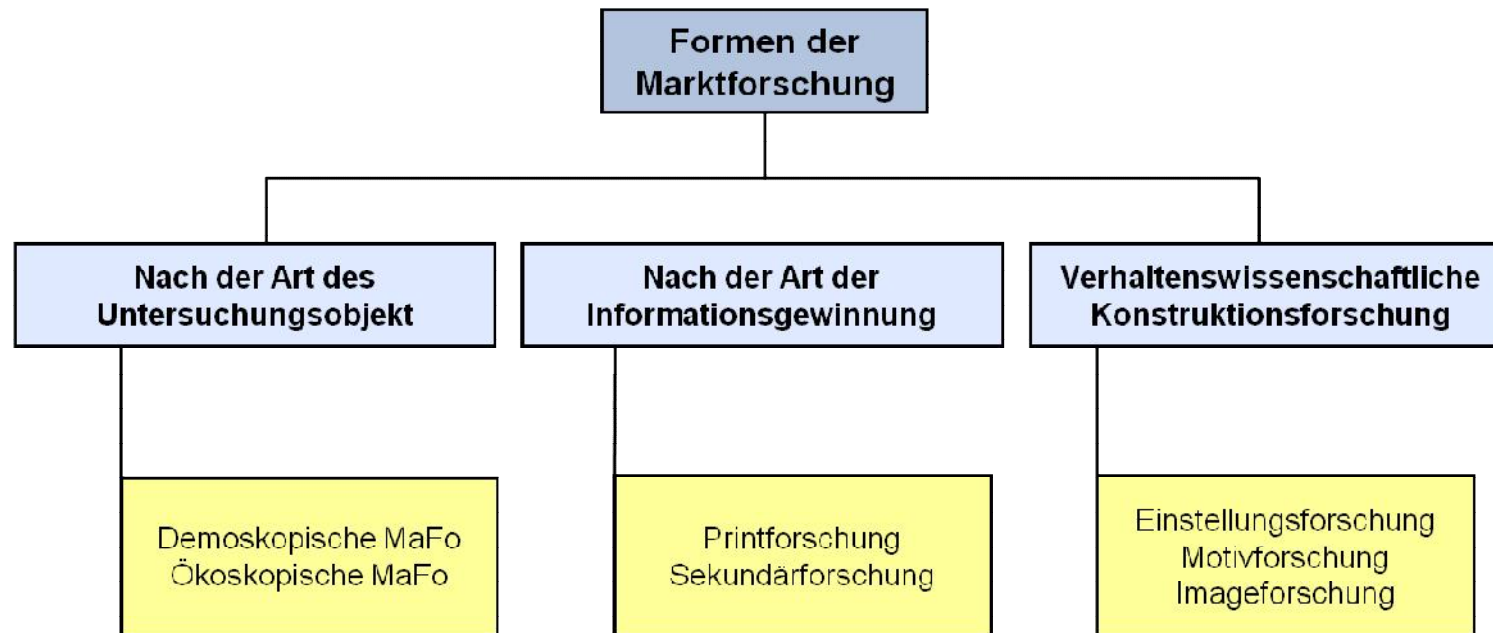

Seite 599, Abb. 35: Formen der Marktforschung

## KAPITEL F: ABSATZ UND MARKETING

### 2. INFORMATIONSGEWINNUNG IM MARKETING

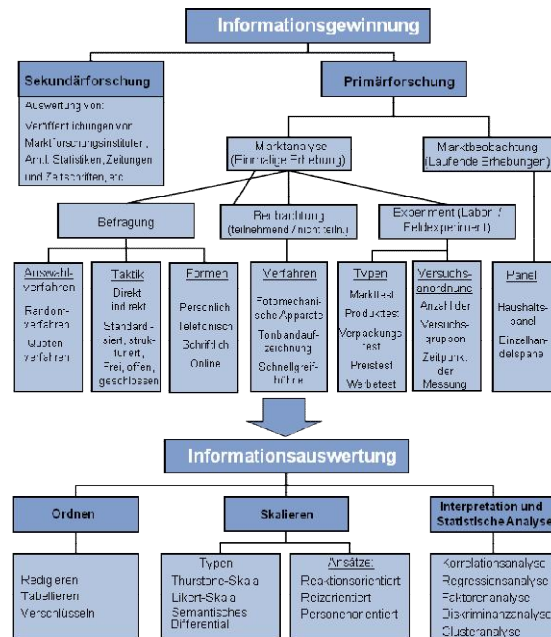

Seite 603, Abb. 36: Schema der Marketingforschung  
(Vgl. Meffert, H./ Burmann, C./ Kirchgeorg, M.: Marketing,, 9.Aufl., Wiesbaden 2000, S. 147 ff)



## KAPITEL F: ABSATZ UND MARKETING

### 2. INFORMATIONSGEWINNUNG IM MARKETING

|            | Haushalt                            | Unternehmung bzw.<br>Institution                            |
|------------|-------------------------------------|-------------------------------------------------------------|
| Individuum | Kaufentscheidung des<br>Konsumenten | Kaufentscheidung des<br>Repräsentanten                      |
| Kollektiv  | Kaufentscheidungen<br>von Familien  | Kaufentscheidung des<br>Einkaufsgremiums<br>(Buying-Center) |

Seite 606, Abb. 37: Grundtypen von Kaufentscheidungen  
(Vgl. Meffert, H./ Burmann, C./ Kirchgeorg, M.: Marketing, 9. Aufl., Wiesbaden 2000, S. 103)

## KAPITEL F: ABSATZ UND MARKETING

### 2. INFORMATIONSGEWINNUNG IM MARKETING

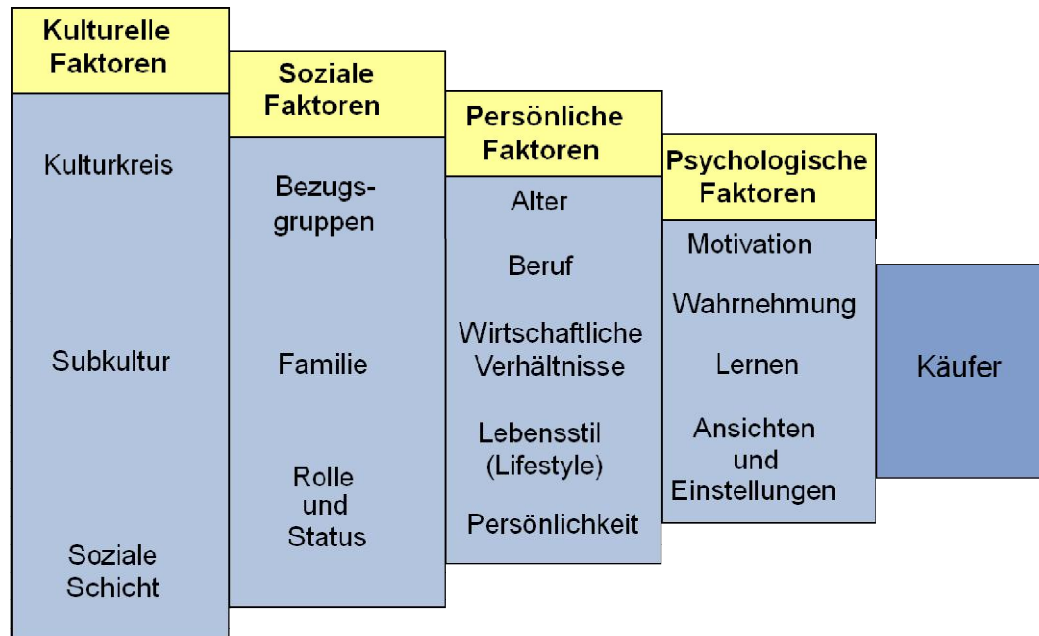

Seite 607, Abb. 38: Einflussfaktoren auf das Kaufverhalten  
(Vgl. Kotler, P. / Bliemel, F.: Marketing-Management, 10.Aufl., Stuttgart 2001, S. 325)

## KAPITEL F: ABSATZ UND MARKETING

### 2. INFORMATIONSGEWINNUNG IM MARKETING

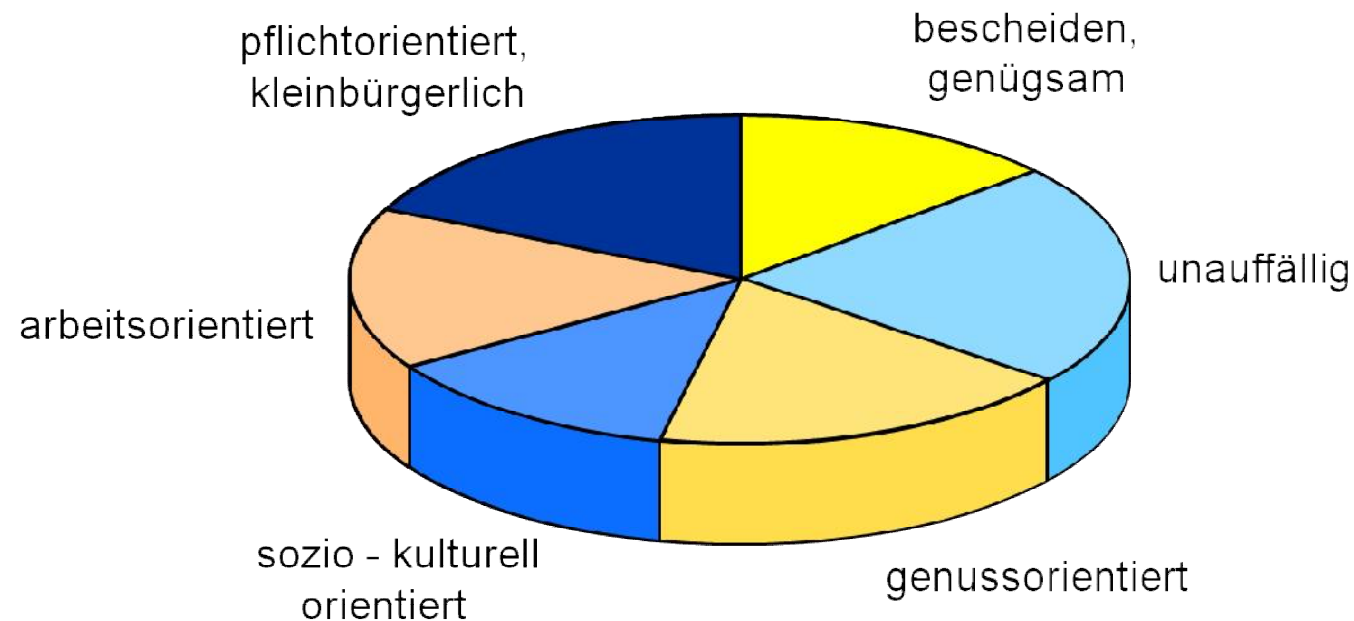

Seite 609, Abb. 39: Typologie des allgemeinen Verbraucherverhaltens  
(Vgl. Kuhnle, H.: Was bewegt Marketing, Wiesbaden 1989, S. 110)

## KAPITEL F: ABSATZ UND MARKETING

### 2. INFORMATIONSGEWINNUNG IM MARKETING

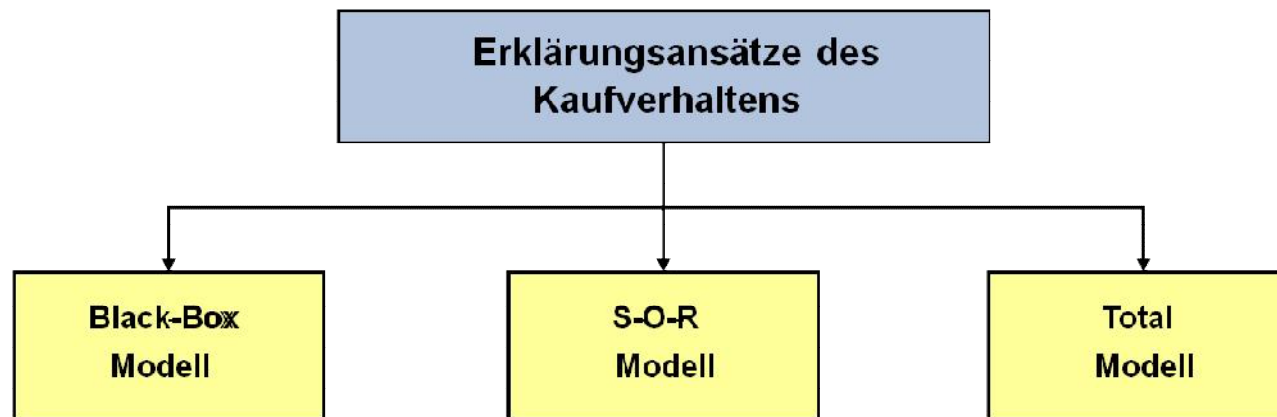

Seite 609, Abb. 40: Erklärungsmodelle des Käuferverhaltens

## KAPITEL F: ABSATZ UND MARKETING

### 2. INFORMATIONSGEWINNUNG IM MARKETING

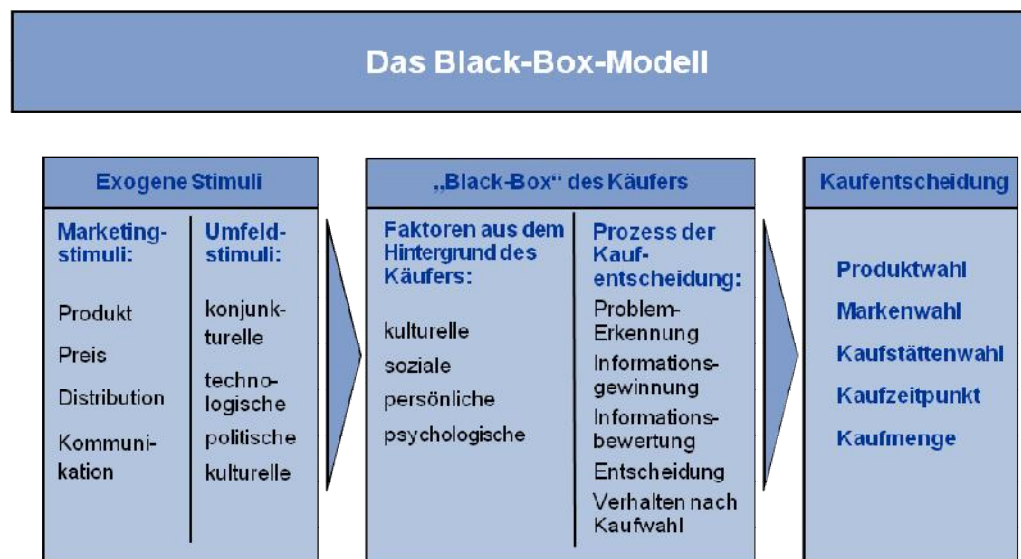

Seite 610, Abb. 41: Das Black-Box-Modell  
(Vgl. Kotler, P. / Bliemel, F.: Marketing-Management, 10.Aufl., Stuttgart 2001, S.324)

## KAPITEL F: ABSATZ UND MARKETING

### 2. INFORMATIONSGEWINNUNG IM MARKETING

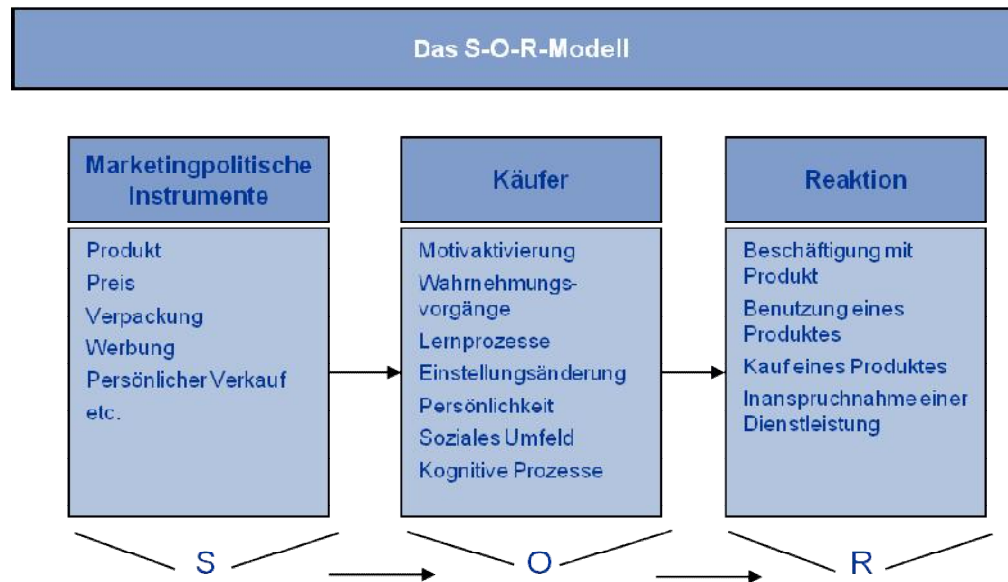

Seite 611, Abb. 42: Das S-O-R-Modell

## KAPITEL F: ABSATZ UND MARKETING

### 2. INFORMATIONSGEWINNUNG IM MARKETING

| Signifikante Informationen: | Symbolische Informationen: | Informationen aus sozialen Quellen: |
|-----------------------------|----------------------------|-------------------------------------|
| - Qualität                  | - Qualität                 |                                     |
| - Preis                     | - Preis                    | - Referenzgruppen                   |
| - Eigenart                  | - Eigenart                 | - soziale Klasse                    |
| - Service                   | - Service                  | - Familie                           |
| - Erhältlichkeit            | - Erhältlichkeit           |                                     |

Seite 612, Abb. 43: Input-Variablen des Howard/Seth-Modells

## KAPITEL F: ABSATZ UND MARKETING

### 2. INFORMATIONSGEWINNUNG IM MARKETING

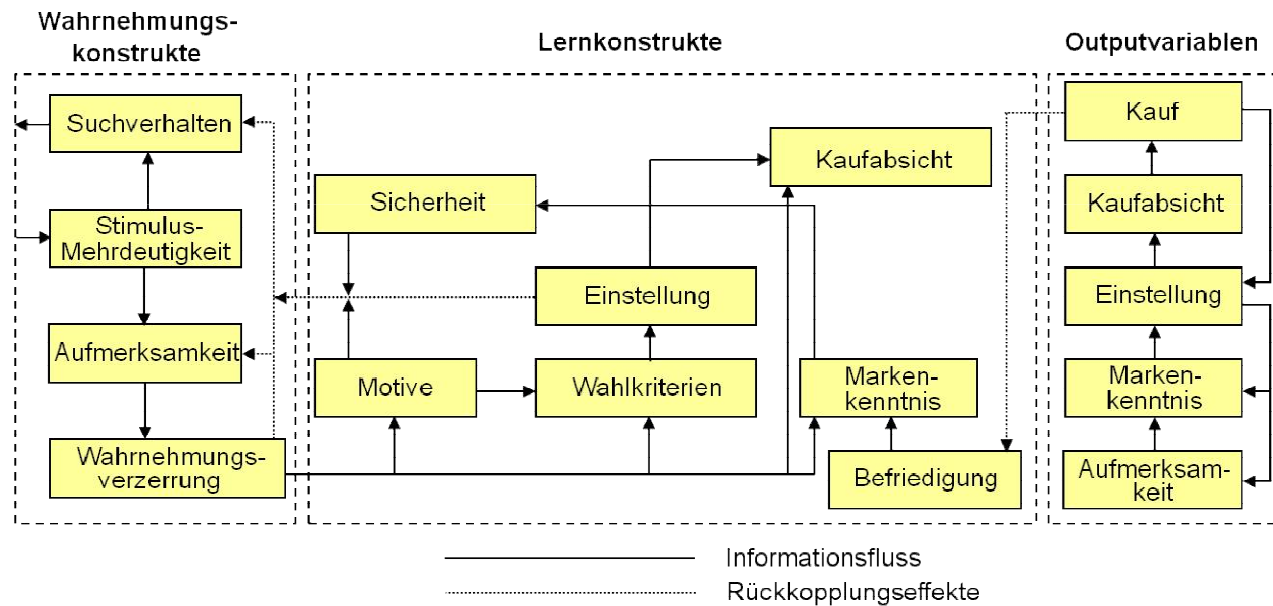

Seite 612, Abb. 44: Die Konsumentenverhaltens-Theorie nach Howard/Seth



# KAPITEL F: ABSATZ UND MARKETING

## 2. INFORMATIONSGEWINNUNG IM MARKETING

| <div>Modelle</div> <div>Konstrukte als Parameter</div> |                          | Psychologisch orientierte Modelle |                            |                            |                    | Soziologisch orientierte Modelle |                                           |                   | Total Modelle      |
|--------------------------------------------------------|--------------------------|-----------------------------------|----------------------------|----------------------------|--------------------|----------------------------------|-------------------------------------------|-------------------|--------------------|
|                                                        |                          | Motivations Modelle               | Lernpsychologische Modelle | Risikotheorietische Ansatz | Dissonanz- Modelle | Referenzgruppenmodelle           | Meinungsführer u. 2-stufige Kommunikation | Diffusionsmodelle | Howard-Seithmodell |
| Lernkonstrukte                                         | Motive                   | x                                 |                            |                            |                    | x                                |                                           |                   | x                  |
|                                                        | Wahrnehmung              |                                   |                            |                            |                    |                                  |                                           |                   | x                  |
|                                                        | Entscheidungskriterien   |                                   |                            |                            |                    | x                                | x                                         | x                 | x                  |
|                                                        | Einstellung              |                                   |                            |                            |                    | x                                |                                           | x                 | x                  |
|                                                        | Kaufabsicht              |                                   |                            |                            |                    |                                  |                                           | x                 | x                  |
|                                                        | Grad der Sicherheit      |                                   |                            | x                          |                    | x                                | x                                         |                   | x                  |
| Wahrnehmungskonstrukte                                 | Befriedigung             |                                   | x                          |                            |                    |                                  |                                           | x                 | x                  |
|                                                        | Aufmerksamkeit           |                                   |                            |                            |                    |                                  |                                           |                   | x                  |
|                                                        | Stimulus-Mehrdeutigkeit  |                                   | x                          |                            |                    |                                  |                                           |                   | x                  |
|                                                        | Wahrnehmungsverzerrungen |                                   | x                          |                            | x                  |                                  | x                                         |                   | x                  |
|                                                        | Aktives Suchverhalten    |                                   |                            | x                          | x                  | x                                |                                           | x                 | x                  |
| Exogene Variable                                       | Wahrnehmung              |                                   | x                          | x                          |                    | x                                |                                           | x                 |                    |
|                                                        | Einkommen                |                                   |                            | x                          |                    |                                  |                                           |                   |                    |
|                                                        | Preis der Güter          |                                   |                            | x                          |                    |                                  |                                           |                   |                    |
|                                                        | Soziales Risiko          |                                   |                            | x                          |                    |                                  |                                           |                   |                    |
|                                                        | Finanzielles Risiko      |                                   |                            | x                          |                    |                                  |                                           |                   |                    |
|                                                        | Dissonanz                |                                   |                            |                            | x                  |                                  |                                           |                   |                    |

Seite 614, Abb. 45: Die Modelle des Käuferverhaltens

## KAPITEL F: ABSATZ UND MARKETING

### 2. INFORMATIONSGEWINNUNG IM MARKETING

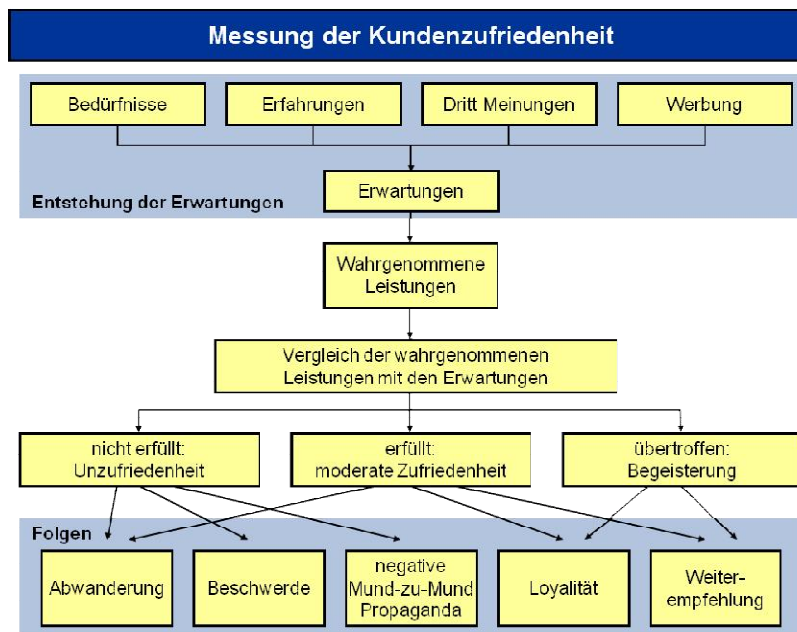

Seite 615, Abb. 46: Messung der Kundenzufriedenheit

## KAPITEL F: ABSATZ UND MARKETING

### 2. INFORMATIONSGEWINNUNG IM MARKETING

| Kundenzufriedenheit                                   | Objektbezogene Messung                                                                                                                                              | Subjektbezogene Messung                                                                                                                                                            |
|-------------------------------------------------------|---------------------------------------------------------------------------------------------------------------------------------------------------------------------|------------------------------------------------------------------------------------------------------------------------------------------------------------------------------------|
| <b>Messung ohne direkten Bezug zu Kundenproblemen</b> | <ul style="list-style-type: none"> <li>– Umsatz/-veränderung</li> <li>– Marktanteil/-änderungen</li> <li>– Wiederkaufsraten</li> <li>– Abwanderungsraten</li> </ul> | <ul style="list-style-type: none"> <li>– Kundenbefragungen</li> <li>– Befragungen der Verkäufer und Absatzmittler Studien, z.B. Deutsches Kundenbarometer</li> </ul>               |
| <b>Messung mit direktem Bezug zu Kundenproblemen</b>  | <ul style="list-style-type: none"> <li>– Beschwerdefälle</li> <li>– Häufigkeit objektiver Produktmängel</li> <li>– Häufigkeit der Garantiefälle</li> </ul>          | <ul style="list-style-type: none"> <li>– Häufigkeit wahrgenommener Kundenprobleme</li> <li>– Prozess der Beschwerdeführung</li> <li>– Methode der kritischen Ereignisse</li> </ul> |

Seite 615, Abb. 47: Verfahren der Kundenzufriedenheitsmessung

## KAPITEL F: ABSATZ UND MARKETING

### 2. INFORMATIONSGEWINNUNG IM MARKETING

| Qualitätsfaktoren               | Erklärung                                                                                                                                                                                                                                                                                                                                                        |
|---------------------------------|------------------------------------------------------------------------------------------------------------------------------------------------------------------------------------------------------------------------------------------------------------------------------------------------------------------------------------------------------------------|
| Qualitätsstrategie              | <ul style="list-style-type: none"> <li>– Handlungsrahmen für alle Organisationsangehörigen</li> <li>– Aufgabe und gemeinsames Ziel für alle Beteiligten</li> <li>– Konzentration auf das Übertreffen von Kundenerwartungen sowie von Aktivitäten der Wettbewerber und den Ausbau der eigenen Stärken</li> </ul>                                                  |
| Qualitätsstandards/-indikatoren | <ul style="list-style-type: none"> <li>– Handlungsleitfaden für Mitarbeiter im Kundenkontakt</li> <li>– Maßstab für die Eigen- und Fremdkontrolle von Mitarbeitern</li> <li>– Sicherung der Akzeptanz durch die Mitarbeiter</li> </ul>                                                                                                                           |
| Qualitätsgarantien              | <ul style="list-style-type: none"> <li>– Nach Implementierung und Sicherstellung der Qualitätsstandards als Differenzierungsmerkmal im Wettbewerb</li> <li>– Gelten ohne Einschränkung</li> <li>– Sind für den Kunden bedeutsam, klar verständlich und leicht in Anspruch zu nehmen</li> </ul>                                                                   |
| Kundenwahrnehmung               | <ul style="list-style-type: none"> <li>– Wahrnehmung wird auf kommunizierte Qualitätsgarantien gelenkt</li> <li>– Erwartungen werden präzisiert</li> <li>– Kein undifferenziertes, globales Qualitätsurteil mehr, sondern die Messung der Qualität anhand Erfüllung konkreter Garantien</li> <li>– Ergebnis: Qualität wird steuer- und kontrollierbar</li> </ul> |

Seite 616, Abb. 48: Qualitätsfaktoren

### **3. DAS ABSATZPOLITISCHE INSTRUMENTARIUM**

3.1 PRODUKT- UND PROGRAMMPOLITIK

3.2 KONTRAHIERUNGSPOLITIK

3.3 DISTRIBUTIONSPOLITIK

3.4 KOMMUNIKATIONSPOLITIK

## KAPITEL F: ABSATZ UND MARKETING

### 3. DAS ABSATZPOLITISCHE INSTRUMENTARIUM

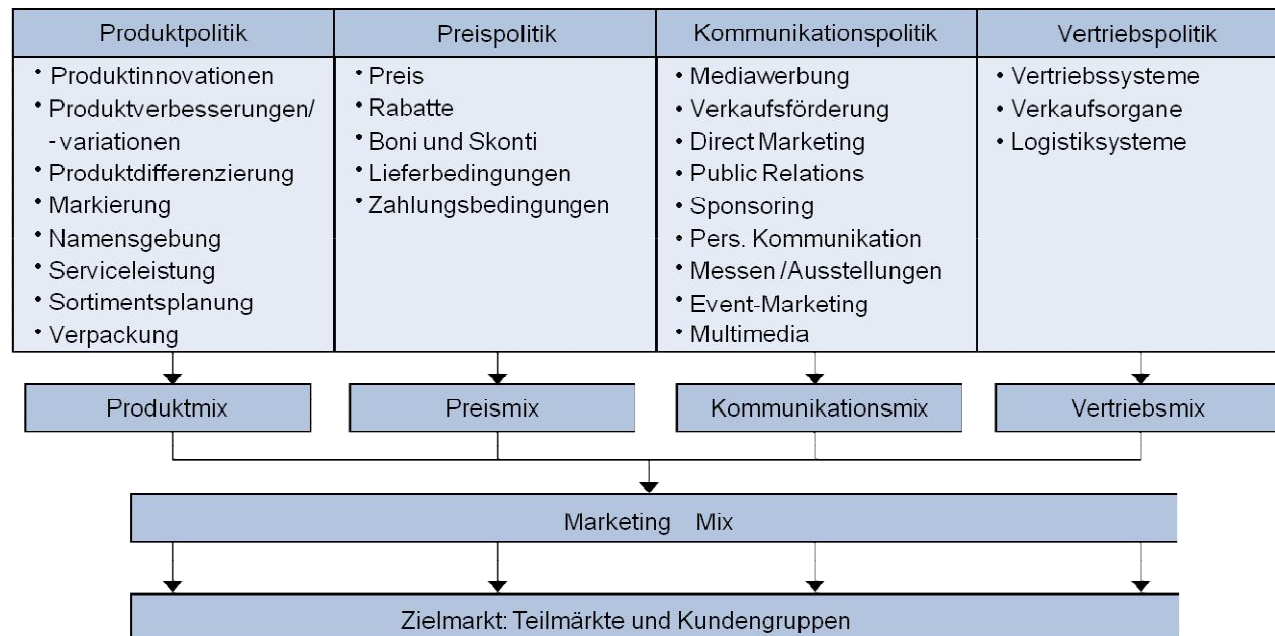

Seite 618, Abb. 49: Komponenten des Marketing-Mix

## KAPITEL F: ABSATZ UND MARKETING

### 3. DAS ABSATZPOLITISCHE INSTRUMENTARIUM

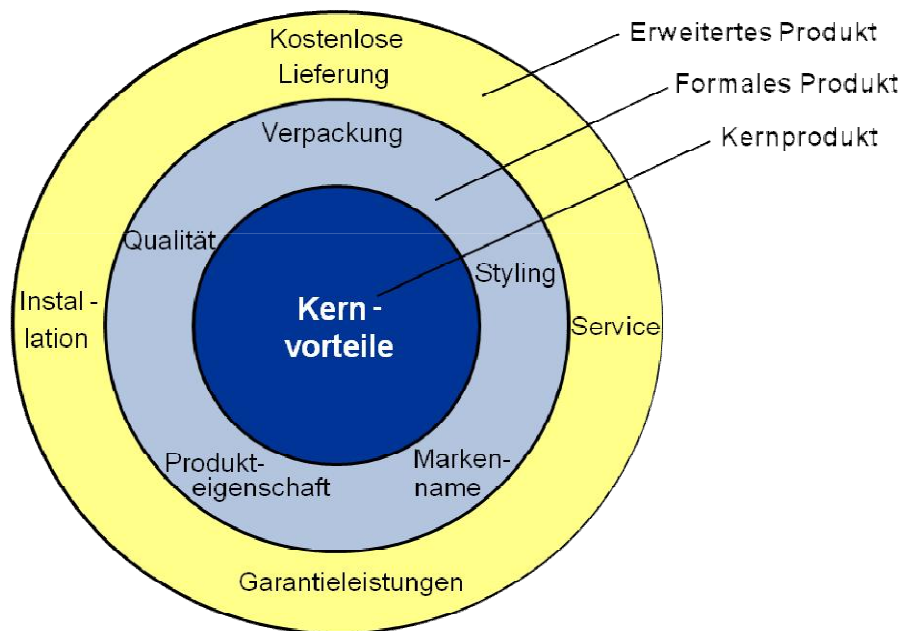

Seite 619, Abb. 50: Die drei Ebenen des Produktbegriffs

## KAPITEL F: ABSATZ UND MARKETING

### 3. DAS ABSATZPOLITISCHE INSTRUMENTARIUM

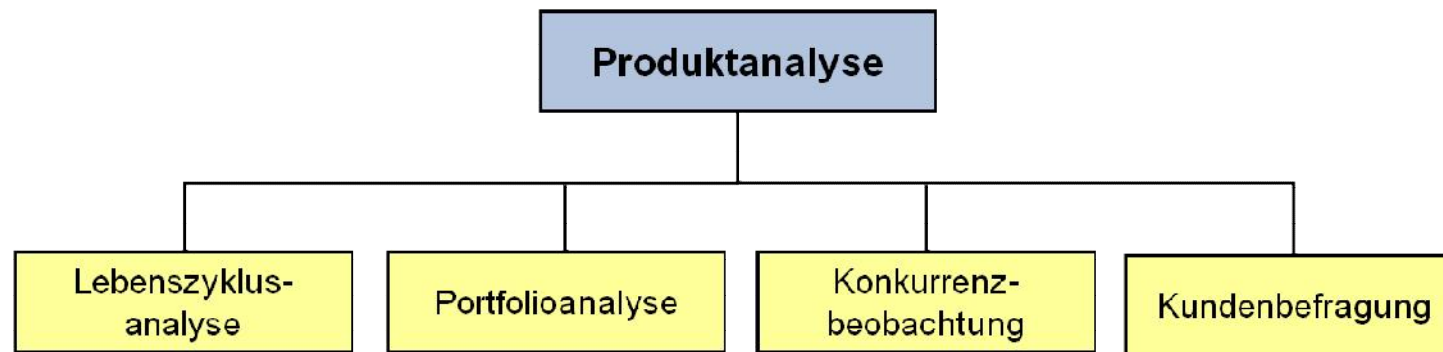

Seite 621, Abb. 51: Methoden der Produktanalyse



## KAPITEL F: ABSATZ UND MARKETING

### 3. DAS ABSATZPOLITISCHE INSTRUMENTARIUM

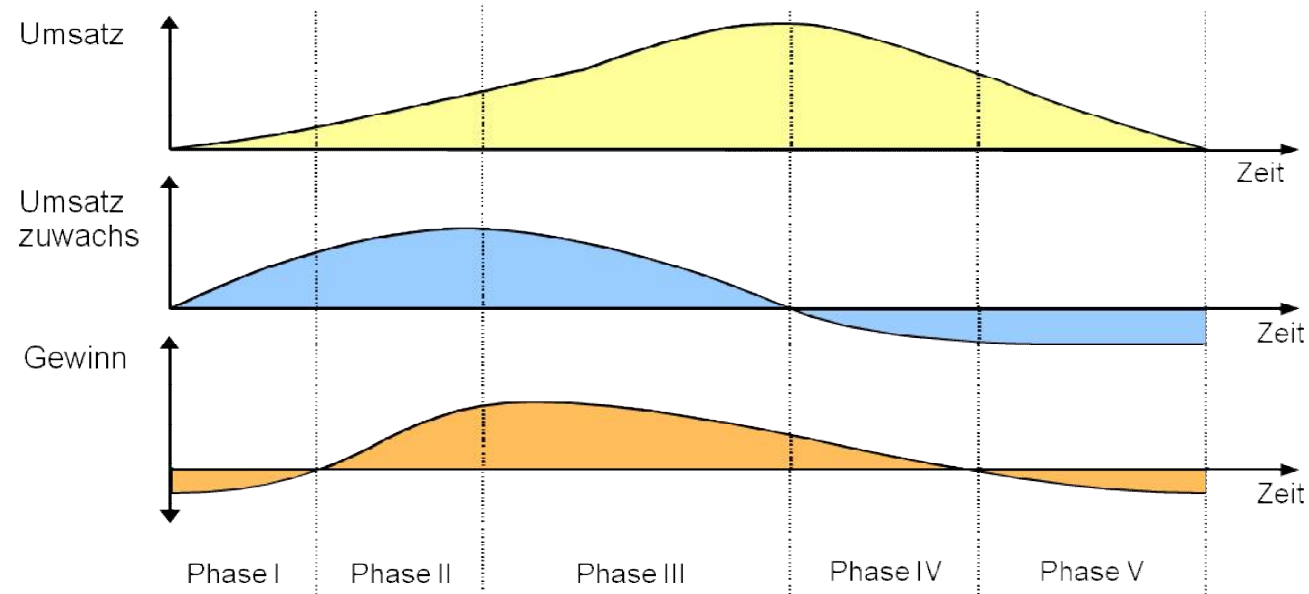

Seite 622, Abb. 52: Idealtypischer Produktlebenszyklus

## KAPITEL F: ABSATZ UND MARKETING

### 3. DAS ABSATZPOLITISCHE INSTRUMENTARIUM

| Phasen des Produkt-Lebenszyklus |                                                   |                                                            |                                                                     |                                |
|---------------------------------|---------------------------------------------------|------------------------------------------------------------|---------------------------------------------------------------------|--------------------------------|
| Kriterien                       | Einführung                                        | Wachstum                                                   | Reife & Sättigung                                                   | Rückgang                       |
| Umsatzvolumen                   | Gering                                            | Schnell ansteigend                                         | Spitzenabsatz                                                       | Rückläufig                     |
| Kostenmerkmale                  | Hohe Kosten pro Kunde                             | Durchschn. Kosten pro Kunde                                | Niedrige Kosten pro Kunde                                           | Niedrige Kosten pro Kunde      |
| Gewinne                         | Negativ                                           | Steigend                                                   | Hoch                                                                | Fallend                        |
| Konkurrenten                    | Keine oder wenige                                 | Zahl der Konkurrenten & Intensität der Konkurrenz nimmt zu | Gleichbleibend, dem Markt entsprechend, Tendenz nach unten          | Zahl der Konkurrenten nimmt ab |
| Operative Marketingziele        | Produkt bekannt machen, Ersteinkäufe herbeiführen | Größtmöglicher Marktanteil (maximale Marktpenetration)     | Größtmöglicher Gewinn bei gleichzeitiger Sättigung des Marktanteils | Kostensenkung und „Absahnen“   |

Seite 622, Abb. 53: Produktlebenszyklus-Phasen

## KAPITEL F: ABSATZ UND MARKETING

### 3. DAS ABSATZPOLITISCHE INSTRUMENTARIUM

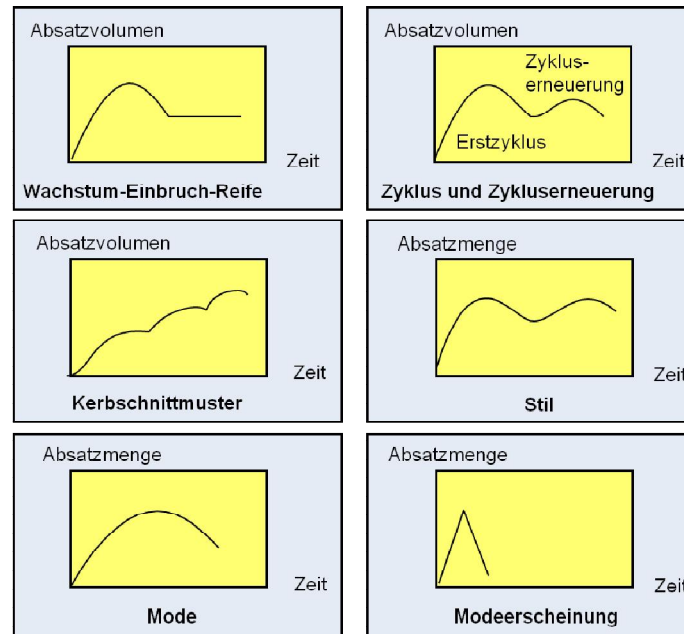

Seite 625, Abb. 54: Idealtypische Produktlebenszyklen  
(Vgl. Kotler, P./ Bliemel, F.: Marketing-Management, 10.Aufl., Stuttgart 2001, S. 575 ff)

## KAPITEL F: ABSATZ UND MARKETING

### 3. DAS ABSATZPOLITISCHE INSTRUMENTARIUM

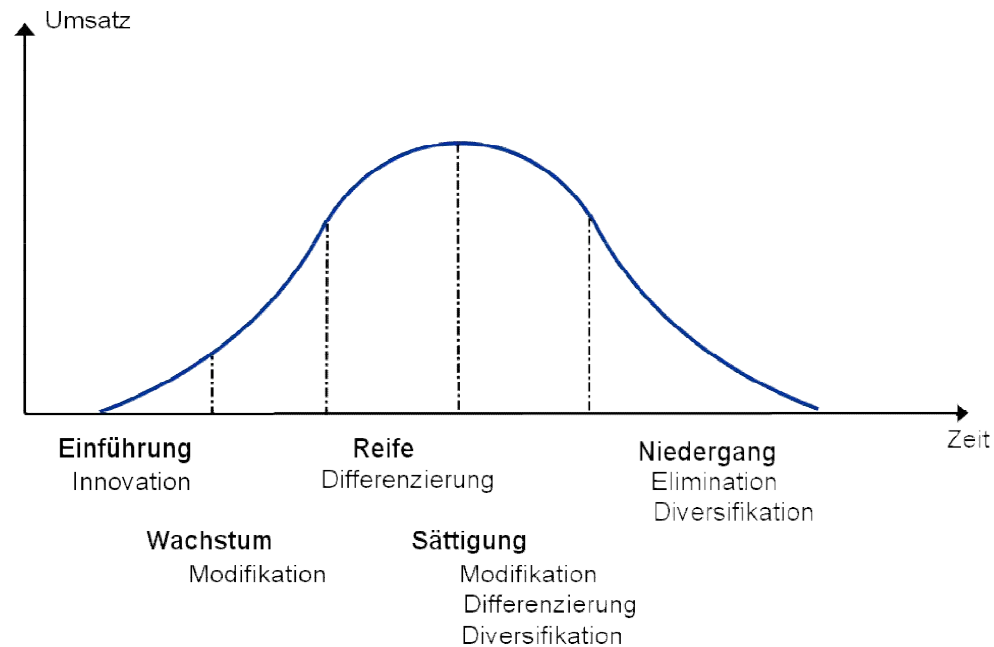

Seite 626, Abb. 55: Produktpolitische Aktionen in den einzelnen Phasen

## KAPITEL F: ABSATZ UND MARKETING

### 3. DAS ABSATZPOLITISCHE INSTRUMENTARIUM

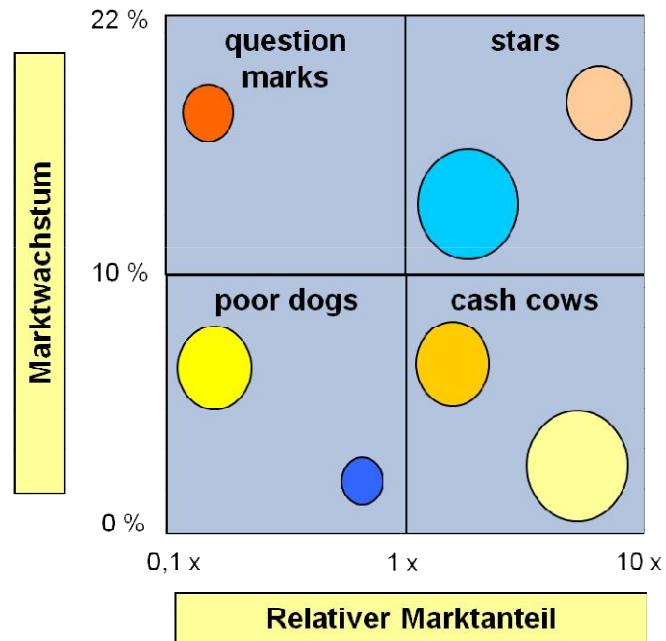

Seite 626, Abb. 56: Marktanteil-Marktwachstums-Portfolio

## KAPITEL F: ABSATZ UND MARKETING

### 3. DAS ABSATZPOLITISCHE INSTRUMENTARIUM

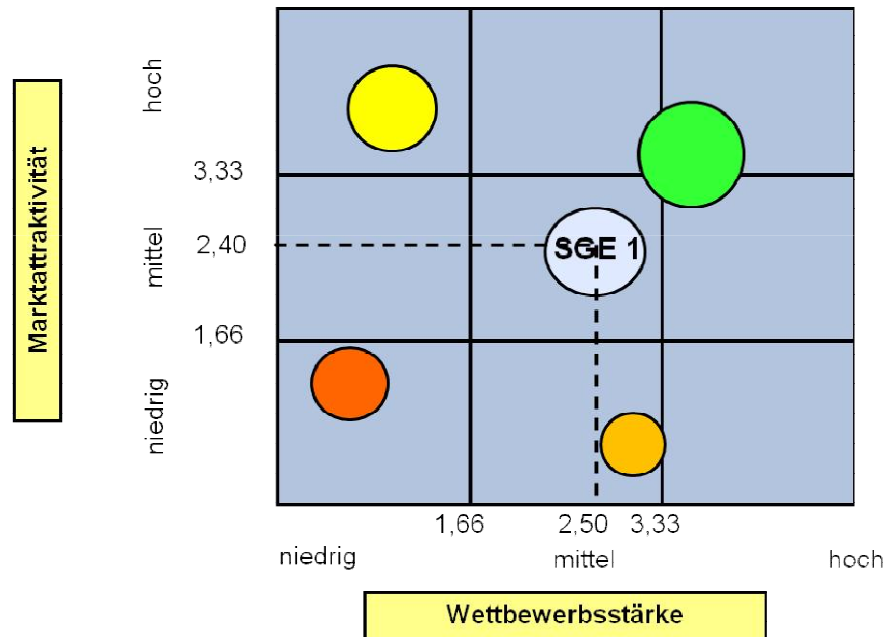

Seite 627, Abb. 57: Das McKinsey Portfolio

## KAPITEL F: ABSATZ UND MARKETING

### 3. DAS ABSATZPOLITISCHE INSTRUMENTARIUM

|                    |                       | Gewichtung | Punktwert<br>(0-5) | Gewichteter<br>Wert |
|--------------------|-----------------------|------------|--------------------|---------------------|
| Marktattraktivität | Marktgröße            | 0,2        | 4                  | 0,8                 |
|                    | Wachstumsrate         | 0,2        | 3                  | 0,6                 |
|                    | Gewinnspanne          | 0,1        | 2                  | 0,2                 |
|                    | Wettbewerbsintensität | 0,1        | 4                  | 0,4                 |
|                    | Sonstige              | 0,4        | 1                  | 0,4                 |
|                    | <b>Σ</b>              | <b>1,0</b> |                    | <b>2,4</b>          |
| Wettbewerbsstärke  | Marktanteil           | 0,2        | 3                  | 0,6                 |
|                    | Produktqualität       | 0,1        | 5                  | 0,5                 |
|                    | Stückkosten           | 0,1        | 2                  | 0,2                 |
|                    | Markenimage           | 0,1        | 3                  | 0,3                 |
|                    | Vertrieb              | 0,1        | 1                  | 0,1                 |
|                    | Sonstige              | 0,4        | 2                  | 0,8                 |
|                    | <b>Σ</b>              | <b>1,0</b> |                    | <b>2,5</b>          |

Seite 628, Abb. 58: Die McKinsey-Matrix

## KAPITEL F: ABSATZ UND MARKETING

### 3. DAS ABSATZPOLITISCHE INSTRUMENTARIUM

|                                                                               |                                                                         |                                                                                                                                         |
|-------------------------------------------------------------------------------|-------------------------------------------------------------------------|-----------------------------------------------------------------------------------------------------------------------------------------|
| <b>Selektives Vorgehen</b><br>Spezialisieren<br>Nischen suchen                | <b>Selektives Wachstum</b><br>Segmentierungsstrategie                   | <b>Investition/Wachstum</b><br>Marktführerschaft anstreben<br>bzw. halten<br>Maximale Investition                                       |
| <b>Ernten</b><br>Spezialisieren<br>Nischen bearbeiten oder<br>Rückzug erwägen | <b>Selektives Vorgehen</b><br>Segmentierungsstrategie<br>Nischen suchen | <b>Selektives Wachstum</b><br>In Wachstumsbereiche<br>investieren<br>Segmentierungsstrategie                                            |
| <b>Ernten</b><br>Rückzug planen<br>Desinvestitionsstrategie                   | <b>Ernten</b><br>Abschöpfen und Rückzug<br>planen                       | <b>Selektives Vorgehen</b><br>Position halten oder<br>Rückzug anstreben<br>Investition nur zur <b>Erhaltung</b><br>ansonsten Abschöpfen |

Seite 628, Abb. 59: Normstrategien für die Felder des McKinsey Portfolio



## KAPITEL F: ABSATZ UND MARKETING

### 3. DAS ABSATZPOLITISCHE INSTRUMENTARIUM

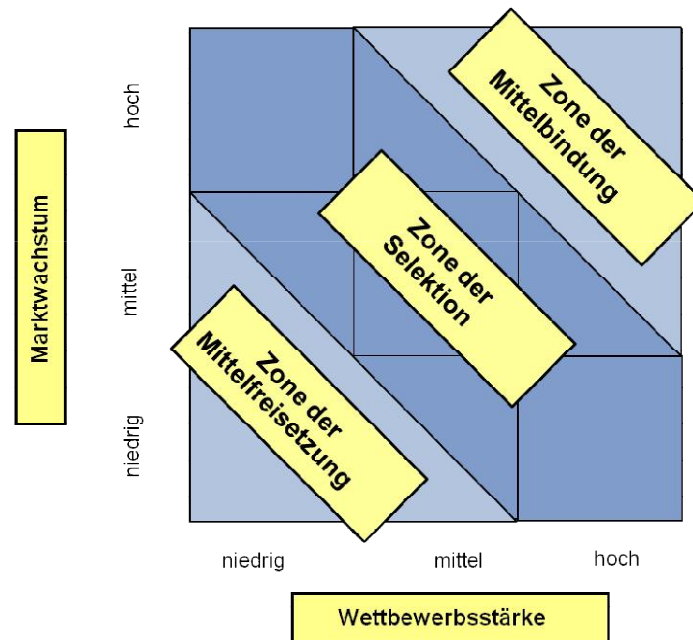

Seite 629, Abb. 60: Die McKinsey-Matrix 2

## KAPITEL F: ABSATZ UND MARKETING

### 3. DAS ABSATZPOLITISCHE INSTRUMENTARIUM

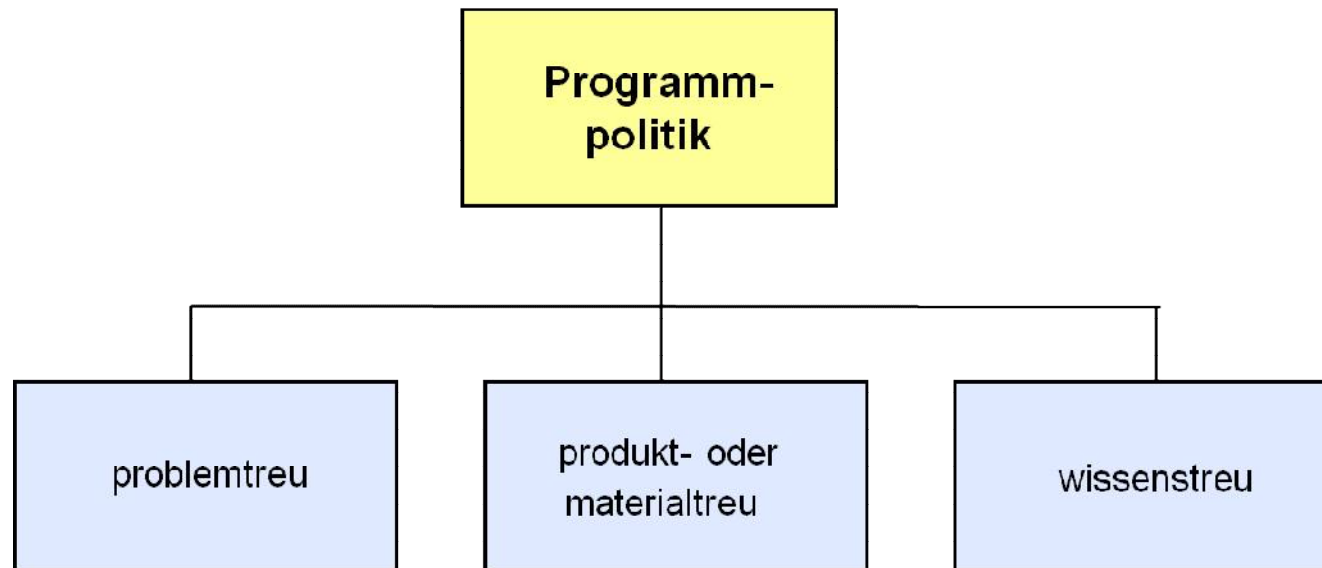

Seite 630, Abb. 61: Arten der Programmpolitik

## KAPITEL F: ABSATZ UND MARKETING

### 3. DAS ABSATZPOLITISCHE INSTRUMENTARIUM

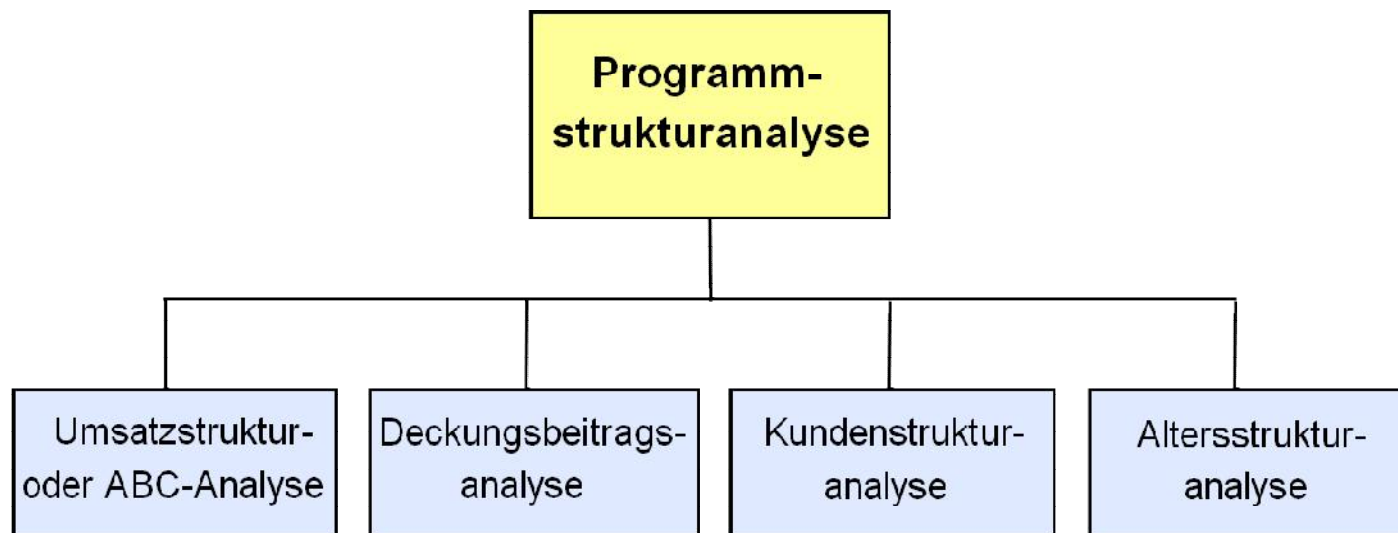

Seite 631, Abb. 62: Programmstrukturanalyse

## KAPITEL F: ABSATZ UND MARKETING

### 3. DAS ABSATZPOLITISCHE INSTRUMENTARIUM

| <div>Zeitpunkt</div> <div>Art</div> | vor dem Kauf                                                                                                                                                                                  | nach dem Kauf<br>(Kundendienst i.e.S.)                                                                                                                               |
|-------------------------------------|-----------------------------------------------------------------------------------------------------------------------------------------------------------------------------------------------|----------------------------------------------------------------------------------------------------------------------------------------------------------------------|
| technisch<br>(Hardware)             | <ul style="list-style-type: none"> <li>– technische Beratung</li> <li>– Projektausarbeitung</li> <li>– Problemlösungsvorschläge</li> <li>– Vorträge</li> <li>– Lieferung zur Probe</li> </ul> | <ul style="list-style-type: none"> <li>– Änderungsdienst</li> <li>– Montage</li> <li>– Ersatzteilversorgung</li> <li>– Wartung</li> <li>– Reparaturdienst</li> </ul> |
| kaufmännisch<br>(Software)          | <ul style="list-style-type: none"> <li>– Kinderhort</li> <li>– Bestelldienst</li> <li>– Parkraum</li> <li>– Beratung und Information</li> <li>– Lieferung zur Probe</li> </ul>                | <ul style="list-style-type: none"> <li>– Umtauschrecht</li> <li>– Zustellen</li> <li>– Verpacken</li> <li>– Kundens Schulung</li> </ul>                              |

Seite 633, Abb. 63: Formen der Kundendienstleistung

## KAPITEL F: ABSATZ UND MARKETING

### 3. DAS ABSATZPOLITISCHE INSTRUMENTARIUM

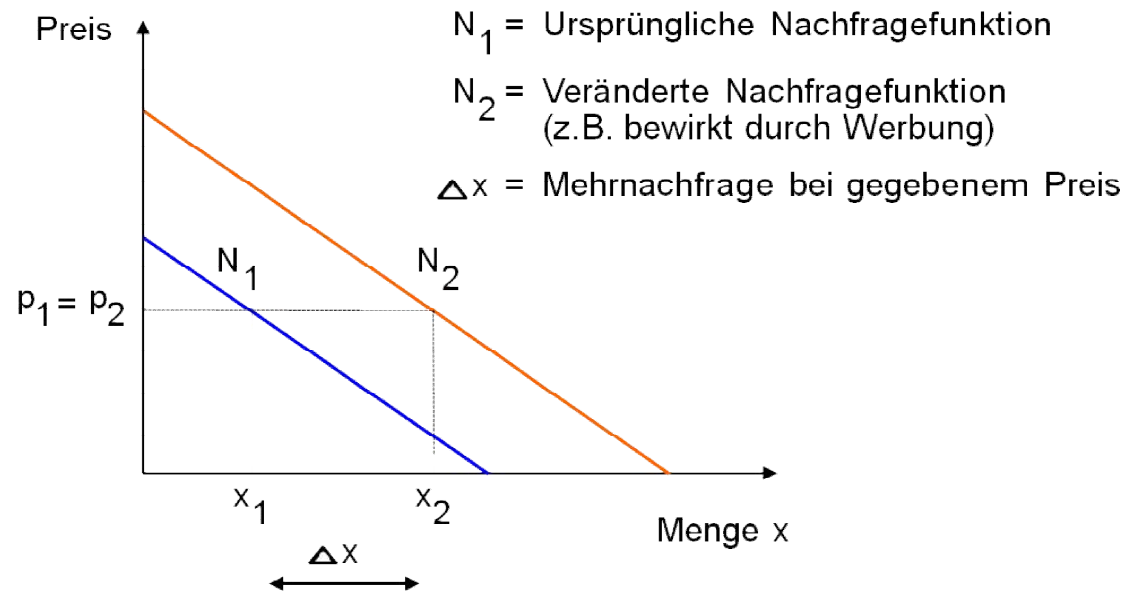

Seite 636, Abb. 64: Verschiebung der Nachfragefunktion

## KAPITEL F: ABSATZ UND MARKETING

### 3. DAS ABSATZPOLITISCHE INSTRUMENTARIUM

**Starre Nachfrage**  
**Vollkommen elastische Nachfrage**

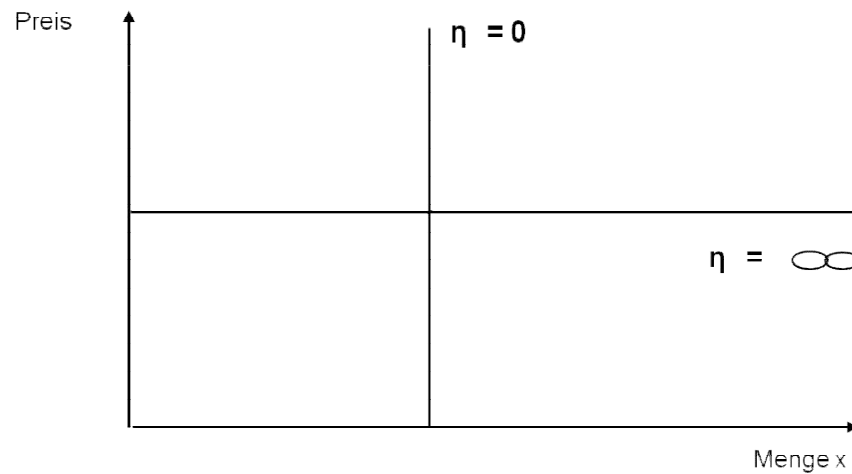

Seite 637, Abb. 65: Starre Nachfrage – Vollkommen elastische Nachfrage

## KAPITEL F: ABSATZ UND MARKETING

### 3. DAS ABSATZPOLITISCHE INSTRUMENTARIUM

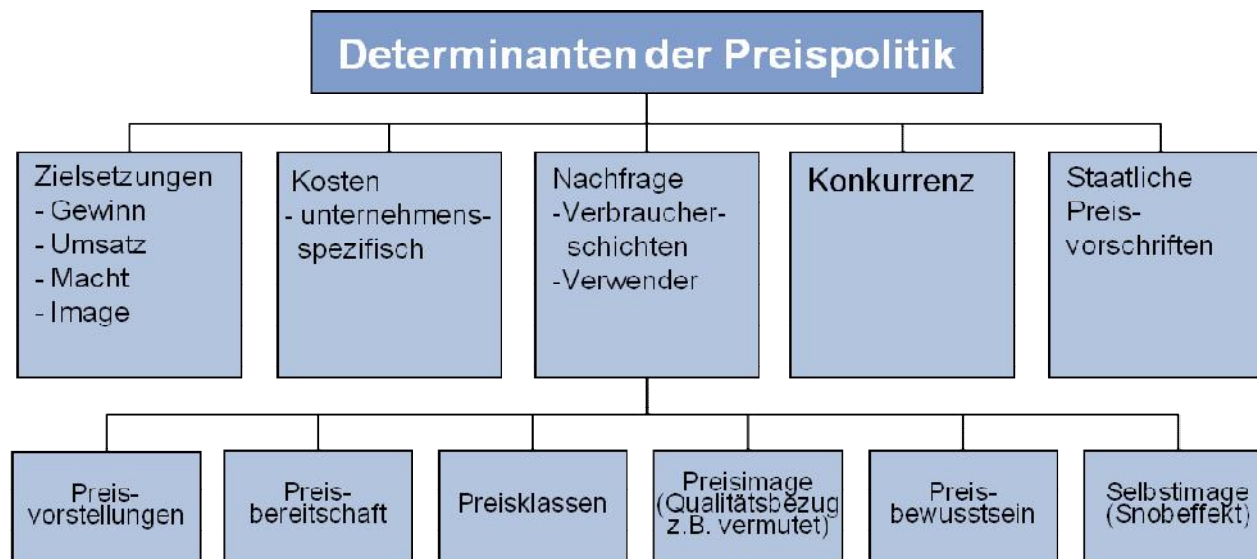

Seite 639, Abb. 66: Determinanten der Preispolitik

## KAPITEL F: ABSATZ UND MARKETING

### 3. DAS ABSATZPOLITISCHE INSTRUMENTARIUM

|   |                                                       |
|---|-------------------------------------------------------|
|   | Variable Einzelkosten der Fertigung                   |
| + | Zuschlag für Fixkosten und Gemeinkosten der Fertigung |
| = | <b>Gesamte Fertigungskosten</b>                       |
| + | Zuschlag für Verwaltungskosten                        |
| = | <b>Herstellungskosten</b>                             |
| + | Zuschlag für Vertriebskosten                          |
| = | <b>Gesamtkosten</b>                                   |
| + | Zuschlag für "angemessenen" Gewinn                    |
| = | <b>Verkaufspreis</b>                                  |
| + | Mehrwertsteuer                                        |
| = | <b>Rechnungspreis</b>                                 |

Seite 639, Abb. 67: Grundschemata der progressiven Zuschlagskalkulation



## KAPITEL F: ABSATZ UND MARKETING

### 3. DAS ABSATZPOLITISCHE INSTRUMENTARIUM

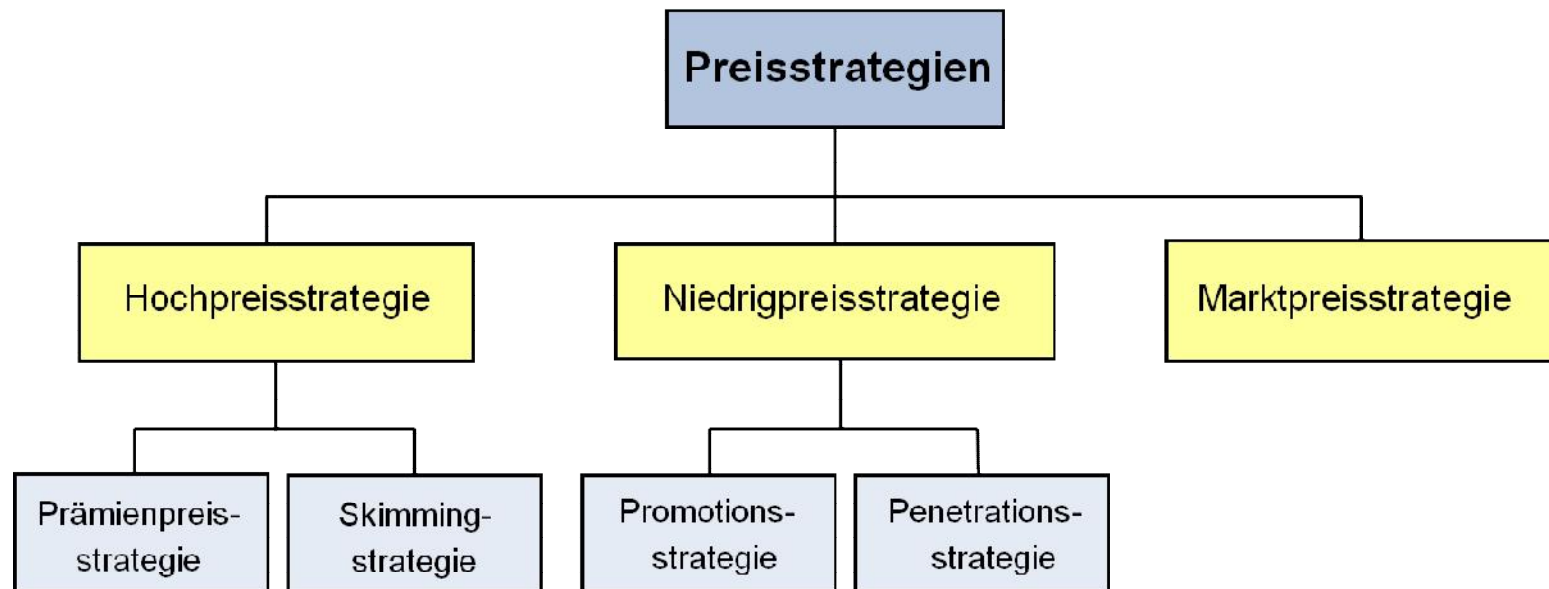

Seite 642, Abb. 68: Preisstrategien

## KAPITEL F: ABSATZ UND MARKETING

### 3. DAS ABSATZPOLITISCHE INSTRUMENTARIUM

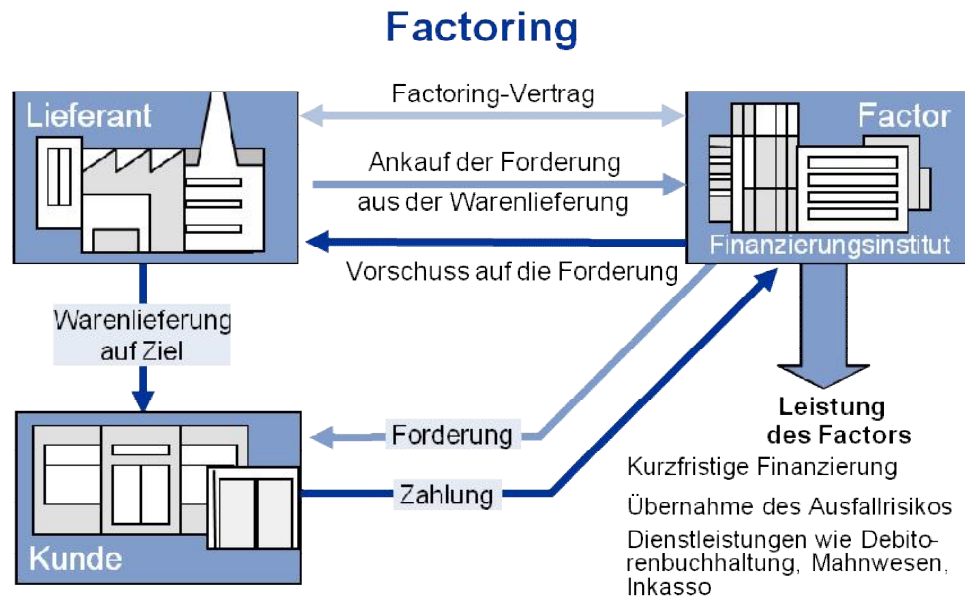

Seite 646, Abb. 69: Factoring  
(Vgl. Zahlenbildersammlung des Erich Schmidt Verlags Nr. 464 030, 9/96)

## KAPITEL F: ABSATZ UND MARKETING

### 3. DAS ABSATZPOLITISCHE INSTRUMENTARIUM

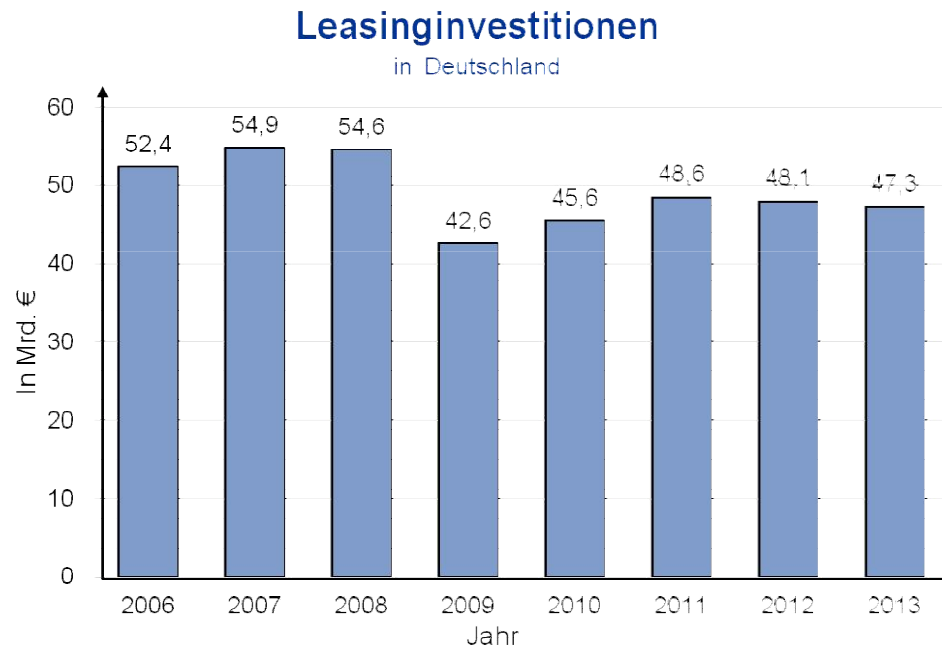

Seite 647, Abb. 70: Leasing in Deutschland (Teil 1)  
(Vgl. Ifo Institut, Sonderdruck aus ifo Schnelldienst Nr. 23, München, Dezember 2014)

## KAPITEL F: ABSATZ UND MARKETING

### 3. DAS ABSATZPOLITISCHE INSTRUMENTARIUM

| Kennzahlen Leasing 2013                                                                           |              | Kraftfahrzeug-Leasing 2013                                                |           |
|---------------------------------------------------------------------------------------------------|--------------|---------------------------------------------------------------------------|-----------|
| Gesamtwirtschaft-liche Investitionen:                                                             | 320,6 Mrd. € | Investitionen des Fahrzeug-Leasings (Neuzugänge) in Mrd. €                | 33,6      |
| davon: Leasinginvestitionen                                                                       | 47,3 Mrd. €  | Stückzahlen                                                               | 1.276.420 |
| - Mobilienleasing:                                                                                | 45,9 Mrd. €  | davon:                                                                    |           |
| KFZ-Leasing, Pro-<br>duktionsmaschinen,<br>Büromaschinen ein-<br>schl. EDV.                       |              | Herstellerunabhängiges Leasing (Mrd. €)                                   | 8,2       |
|                                                                                                   |              | Stückzahlen                                                               | 286.940   |
| - Immobilienleasing:                                                                              | 1,4 Mrd. €   | Herstellerabhängiges Leasing (Mrd. €)                                     | 25,5      |
| Produktionsgebäude,<br>Lagerhallen,<br>Geschäfts- und<br>Bürogebäude, Sons-<br>tige Ausrüstungen. |              | Stückzahlen                                                               | 989.480   |
| Leasingquote                                                                                      | 14,8 %       | Gesamt Neuzulassungen von Kraftfahr-<br>zeugen in Deutschland Stückzahlen | 3.443.921 |
|                                                                                                   |              | davon:                                                                    |           |
|                                                                                                   |              | Leasing-Fahrzeuge in %                                                    | 37,1      |

Seite 647, Abb. 70: Leasing in Deutschland (Teil 2)  
 (Vgl. Ifo Institut, Sonderdruck aus ifo Schnelldienst Nr. 23, München, Dezember 2014)

## KAPITEL F: ABSATZ UND MARKETING

### 3. DAS ABSATZPOLITISCHE INSTRUMENTARIUM

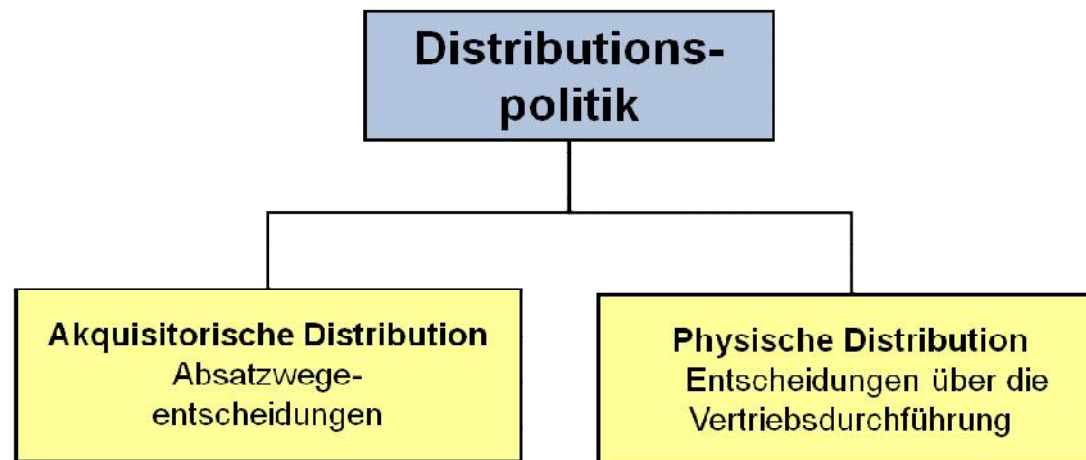

Seite 648, Abb. 71: Distributionspolitik

## KAPITEL F: ABSATZ UND MARKETING

### 3. DAS ABSATZPOLITISCHE INSTRUMENTARIUM

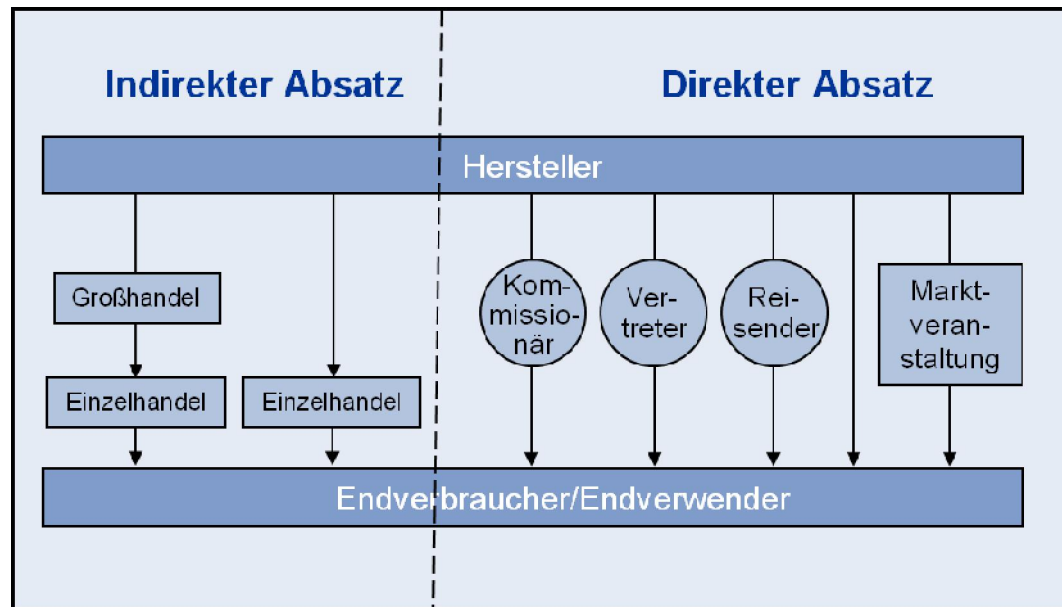

Seite 650, Abb. 72: Das System der Absatzwege

## KAPITEL F: ABSATZ UND MARKETING

### 3. DAS ABSATZPOLITISCHE INSTRUMENTARIUM

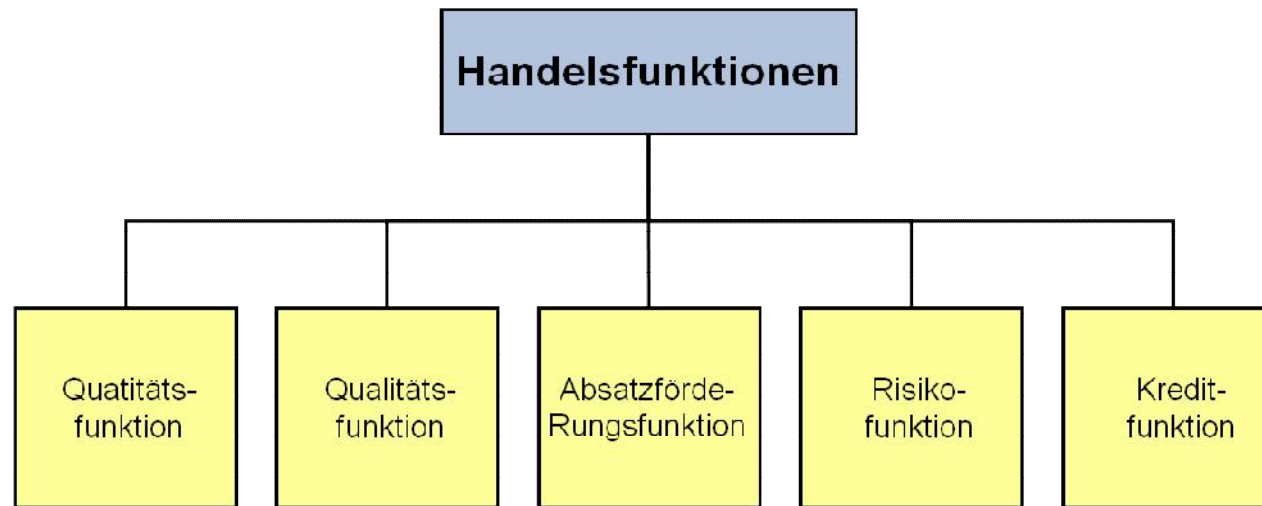

Seite 652, Abb. 73: Handelsfunktionen

## KAPITEL F: ABSATZ UND MARKETING

### 3. DAS ABSATZPOLITISCHE INSTRUMENTARIUM

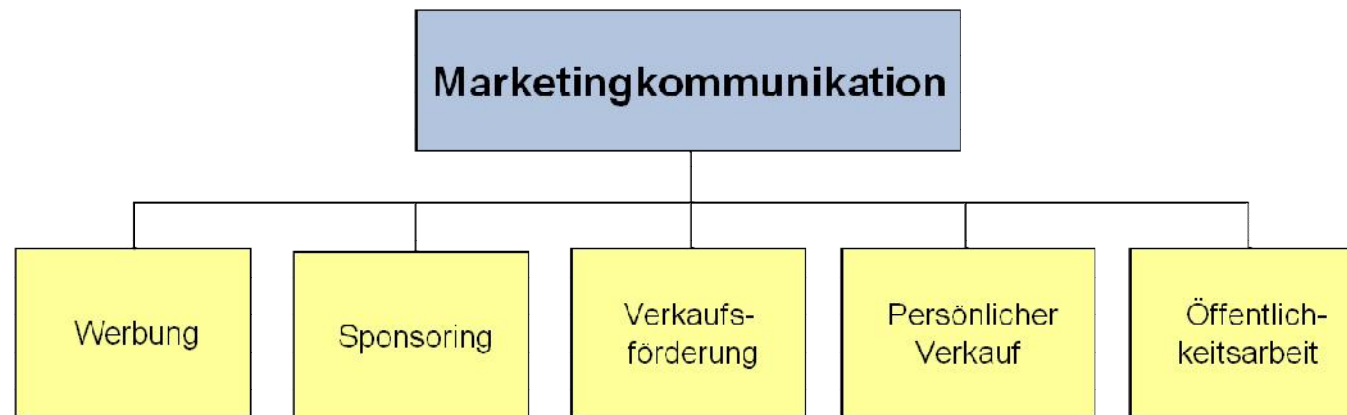

Seite 655, Abb. 74: Marketingkommunikation



## KAPITEL F: ABSATZ UND MARKETING

### 3. DAS ABSATZPOLITISCHE INSTRUMENTARIUM

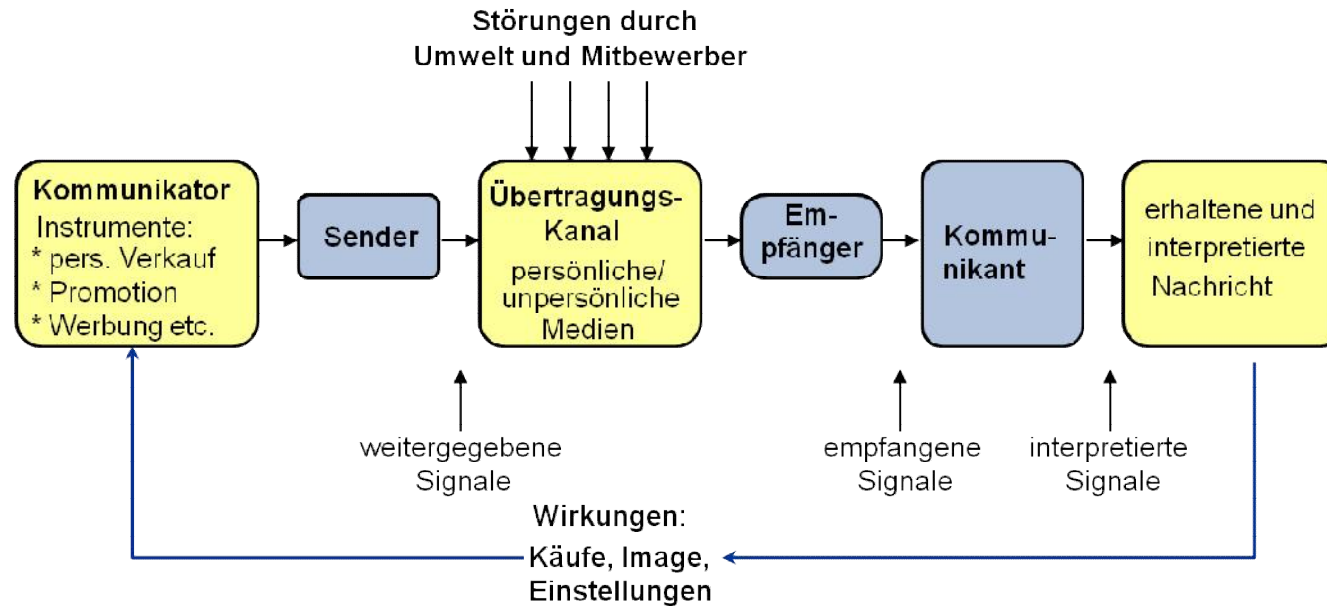

Seite 655, Abb. 75: Kommunikations-Prozess im Marketing

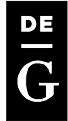

## KAPITEL F: ABSATZ UND MARKETING

### 3. DAS ABSATZPOLITISCHE INSTRUMENTARIUM

| Werbeträger                  |                           | Einnahmen<br>(in Mio. €)* | Vorteile                                                     | Nachteile                                                        | Eignung                  |
|------------------------------|---------------------------|---------------------------|--------------------------------------------------------------|------------------------------------------------------------------|--------------------------|
| Print-<br>medien             | Zeitung                   | 2994                      | Aktualität,<br>Regionalität                                  | Gestaltung, Wahrnehmung,<br>Streuverluste                        | Informierende<br>Werbung |
|                              | Zeitschrift               | 2.058                     | Gestaltung,<br>Reichweite,<br>passendes Umfeld               | Streuverluste                                                    | Sympathie-<br>werbung    |
| Elektro-<br>nische<br>Medien | Fernse-<br>hen            | 4.292                     | Gestaltung,<br>Reichweite,<br>passendes Umfeld               | Streuverluste, Zapping                                           | Sympathie-<br>werbung    |
|                              | Hörfunk                   | 738                       | Aktualität, Regio-<br>nalität, Reichweite                    | Gestaltung, Flüchtigkeit                                         | Informierende<br>Werbung |
|                              | Film-<br>theater          | 81                        | Aktualität, Länge,<br>Aufmerksamkeit                         | Reichweite                                                       | Sympathie-<br>werbung    |
|                              | Online u.<br>Mobile       | 1.344                     | Aktualität, Reich-<br>weite, Interaktivi-<br>tät, Gestaltung | Umfeld, Technikab-<br>hängigkeit, internetfer-<br>ne Zielgruppen | universal                |
| Außen-<br>medien             | Plakat/<br>Verkehrsmittel | 926                       | Kaufnähe, Reich-<br>weite, geringe<br>Vermeidbarkeit         | Streuverluste, Wahr-<br>nehmung, unpassen-<br>des/kein Umfeld    | universal                |

\* Netto-Werbeeinnahmen erfassbarer Werbeträger (ZAW 2006); weitere Werbeträger: Anzeigenblätter (1.847), Verzeichnismedien (970), Zeitungssupplements (79)

Seite 662, Abb. 76: Verteilung der Nettowerbeeinnahmen erfassbarer Werbeträger im Jahr 2014 (Vgl. ZAW, Werbewirtschaft 2015)

## KAPITEL F: ABSATZ UND MARKETING

### 3. DAS ABSATZPOLITISCHE INSTRUMENTARIUM

| 4                    | Personen, Personengruppen,<br>Institutionen                                                                                                                    | Veranstaltungen                                                                                                                                                                                              |
|----------------------|----------------------------------------------------------------------------------------------------------------------------------------------------------------|--------------------------------------------------------------------------------------------------------------------------------------------------------------------------------------------------------------|
| Werbung              | <ul style="list-style-type: none"> <li>– Aufschriften auf der Kleidung (Trikotwerbung)</li> <li>– Ausrüstungsverträge</li> <li>– Testimonialwerbung</li> </ul> | <ul style="list-style-type: none"> <li>– Beschriftung von Banden</li> <li>– Anzeigen in Programmheften und auf Plakaten</li> <li>– Benennung der Veranstaltung nach dem Sponsor (Titelsponsoring)</li> </ul> |
| Verkaufsförderung    | <ul style="list-style-type: none"> <li>– Autogrammstunden</li> <li>– Händlertreffen, Messen</li> <li>– Vorträge</li> </ul>                                     | <ul style="list-style-type: none"> <li>– VIP-Lounges</li> <li>– Ehrenlogen</li> <li>– Sondergastspiele (private views)</li> </ul>                                                                            |
| Public Relations     | <ul style="list-style-type: none"> <li>– Veranstaltungen mit gesponserten Prominenten</li> <li>– Pressekonferenzen</li> <li>– Vorträge</li> </ul>              | <ul style="list-style-type: none"> <li>– Kongresse, Tagungen</li> <li>– Ehrenlogen</li> <li>– Sondergastspiele (private views)</li> </ul>                                                                    |
| Persönlicher Verkauf | <ul style="list-style-type: none"> <li>– Gesponserte Personen als Repräsentanten einer Unternehmung</li> </ul>                                                 | <ul style="list-style-type: none"> <li>– Verkaufsgespräche während einer gesponserten Veranstaltung</li> </ul>                                                                                               |

Seite 664, Abb. 77: Sponsoring in der Marketingkommunikation  
(Vgl. Weis, H.-C.: Marketing, 17. Aufl., Herne 2015., S. 613)

## KAPITEL F: ABSATZ UND MARKETING

### 3. DAS ABSATZPOLITISCHE INSTRUMENTARIUM

| Sponsoringpräferenzen deutscher Unternehmen (in %) |      |      |      |      |      |      |
|----------------------------------------------------|------|------|------|------|------|------|
| Sponsoringarten                                    | 2000 | 2002 | 2004 | 2006 | 2008 | 2010 |
| Sportsponsoring                                    | 44,8 | 46,3 | 44,1 | 47,6 | 44,2 | 44,5 |
| Kunst-,<br>Kultursponsoring                        | 24,9 | 25,9 | 28,7 | 23,6 | 21,1 | 18,2 |
| Soziosponsoring                                    | 13,0 | 14,2 | 14,7 | 12,0 | 15,7 | 16,0 |
| Wissenschaftssponsoring                            | 5,7  | 7,4  | 6,4  | 9,9  | 12,3 | 13,1 |
| Mediensponsoring                                   | 8,5  | 3,5  | 3,6  | 3,4  | 3,5  | 3,4  |
| Ökosponsoring                                      | 3,1  | 2,7  | 2,5  | 2,6  | 2,6  | 3,4  |

Seite 665, Abb. 78: Sponsoringpräferenzen  
 (Vgl.: Universität der Bundeswehr München, Sponsoring Trends 2010, S. 14)

## KAPITEL F: ABSATZ UND MARKETING

### 3. DAS ABSATZPOLITISCHE INSTRUMENTARIUM

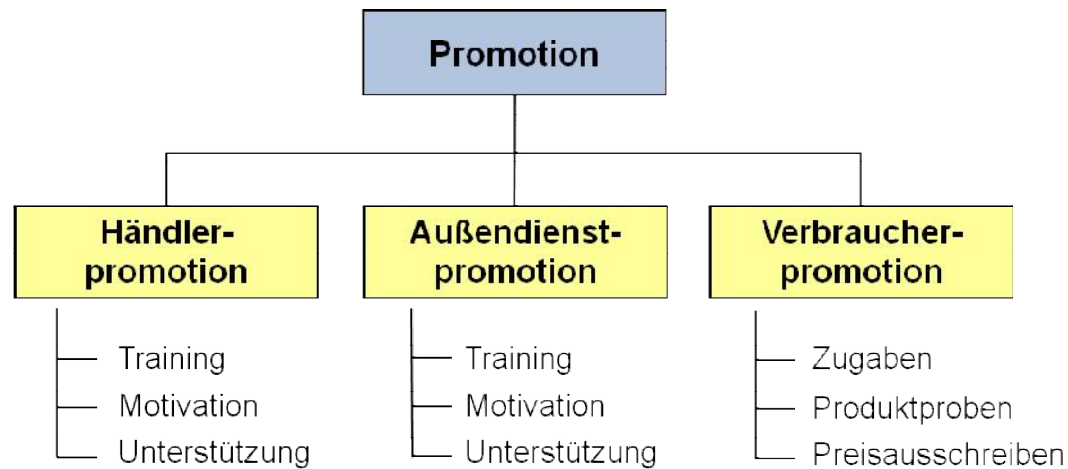

Seite 666, Abb. 79: Arten der Promotion

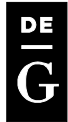

## KAPITEL F: ABSATZ UND MARKETING

### 3. DAS ABSATZPOLITISCHE INSTRUMENTARIUM

| Promotions                   | Beschreibung                                                                                                                        | Wirksamkeit                                                                                               | Rechtslage                                                                                               |
|------------------------------|-------------------------------------------------------------------------------------------------------------------------------------|-----------------------------------------------------------------------------------------------------------|----------------------------------------------------------------------------------------------------------|
| <b>Produktproben</b>         | Kurzzeitige Probenverteilung des geförderten Produkts an der Haustüre, in Geschäften oder auf Anforderung des Verbrauchers          | Wirkungsvoll bei bisherigen Nichtkäufern und bei der Einführung neuer Produkte                            | Größe der Probepackung muss zur Erprobung tatsächlich notwendig sein, an-dem-falls unlauterer Wettbewerb |
| <b>Zugaben</b>               | Vergabe von Waren, Gutscheinen etc. beim Kauf des geförderten Produktes                                                             | Durchschnittliche Umsatzerfolge ohne langfristige Wirkung                                                 | Wert der Zugabe unterliegt gesetzlichen Beschränkungen                                                   |
| <b>Gewinnspiele</b>          | Der Produktkauf schließt die Teilnahme an einem Wettbewerb und die Chance eines Gewinns ein                                         | Schnelle Umsatzanstiege, aber kurzfristig (Erfahrungswert: bis zu 30 % Umsatzanstieg in der ersten Woche) | Produktkauf als Voraussetzung zur Teilnahme am Wettbewerb ist gesetzlich wichtig                         |
| <b>Demonstrationsverkauf</b> | Demonstration und Verkauf des Produktes durch Pro-pagandisten, Passantenwerber sowie auf privaten oder öffentlichen Verkaufsparties | Gute Umsatzerfolge, aber nur kurzfristig                                                                  | Passantenwerbung verstößt gegen die guten Sitten und ist daher unzulässig                                |
| <b>Merchandising</b>         | besondere Platzierung und Hervorhebung des geförderten Produktes am Verkaufsort (PoP) durch Displays, Di-Einsatz u.a.m.             | Umsatzsteigerungen von durchschnittlich 40 bis 50 %                                                       | Keine Probleme                                                                                           |

Seite 667, Abb. 80: Einige Maßnahmen von Verbraucherpromotions und ihre rechtliche Beurteilung (Vgl. Böcker, F.: Marketing, 5. Aufl., Stuttgart 1994, S. 370)

## **4. DIE INTEGRATION DER MARKETING-INSTRUMENTE ZUM MARKETING-MIX**

4.1 DER INSTRUMENTEN-EINSATZ

4.2 DAS MARKETING-MIX IM PRODUKTLEBENSZYKLUSMODELL

4.3 MATHEMATISCHE MODELLE ZUM MARKETING-MIX

4.4 KONSEQUENZEN FÜR EIN REALISTISCHES MARKETING-MIX

4.5 MARKETING-KONTROLLE

## KAPITEL F: ABSATZ UND MARKETING

### 4. DIE INTEGRATION DER MARKETING-INSTRUMENTE ZUM MARKETING-MIX

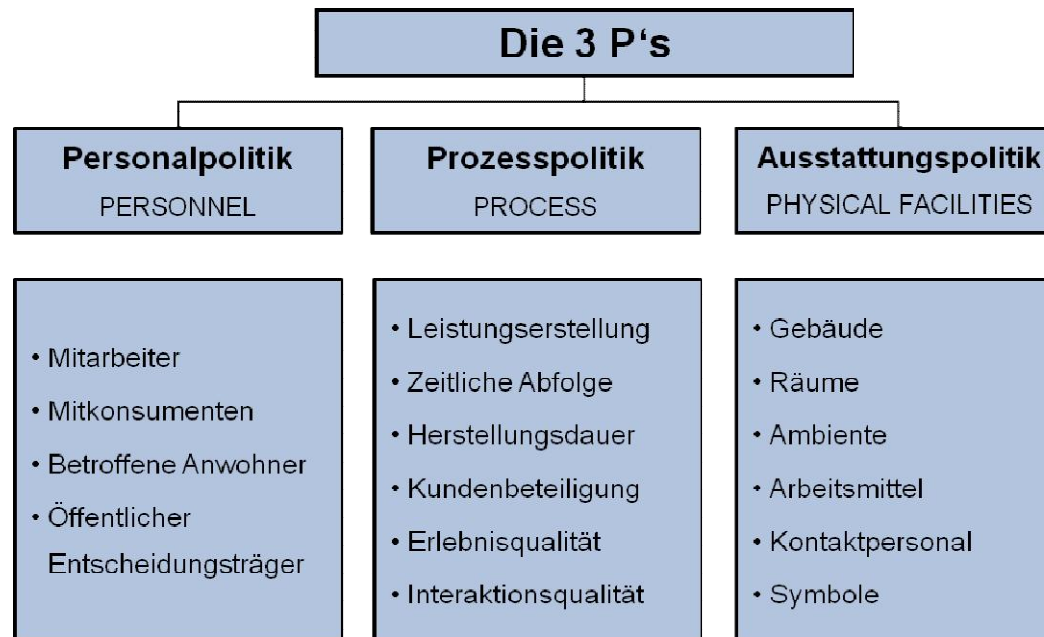

Seite 673, Abb. 81: Die Instrumentalbereiche der 3 P's



## KAPITEL F: ABSATZ UND MARKETING

### 4. DIE INTEGRATION DER MARKETING-INSTRUMENTE ZUM MARKETING-MIX

| Instrumente                                     | Wirtschaftsbereiche |                        |               |        |                      |
|-------------------------------------------------|---------------------|------------------------|---------------|--------|----------------------|
|                                                 | Rohstoffe           | Investitions-<br>güter | Markenartikel | Handel | Dienstl.-<br>Gewerbe |
| Produktpolitik                                  | •                   | •                      | •             | ◦      | ◦                    |
| Sortimentsgestaltung und<br>Diversifizierung    |                     | ◦                      | ◦             | •      |                      |
| Garantieleistungen                              |                     | •                      | •             | •      |                      |
| Kundendienst                                    | •                   | •                      | ◦             | •      | •                    |
| Preispolitik                                    | ◦                   | •                      | ◦             | •      |                      |
| Rabattpolitik                                   | •                   |                        | •             | •      |                      |
| Lieferungs- und<br>Zahlungsbedingungen          |                     | •                      |               | ◦      |                      |
| Kreditgewährung                                 | •                   | •                      |               | ◦      |                      |
| Werbung                                         | •                   | ◦                      | •             | •      | •                    |
| Verkaufsförderung                               | •                   |                        | •             |        | ◦                    |
| Public Relations                                | •                   | •                      | •             |        |                      |
| Absatzmethode                                   | •                   | •                      | •             | ◦      |                      |
| Betriebs- und<br>Lieferbereitschaft             |                     |                        |               | ◦      | •                    |
| Betriebsgröße                                   |                     |                        |               | •      | •                    |
| Standort                                        |                     |                        |               | •      | •                    |
| • Besondere Bedeutung      ◦ Bedingte Bedeutung |                     |                        |               |        |                      |

Seite 677, Abb. 82: Schwerpunktmäßiges Anwendungsfeld der Marketing-Instrumente

## KAPITEL F: ABSATZ UND MARKETING

### 4. DIE INTEGRATION DER MARKETING-INSTRUMENTE ZUM MARKETING-MIX

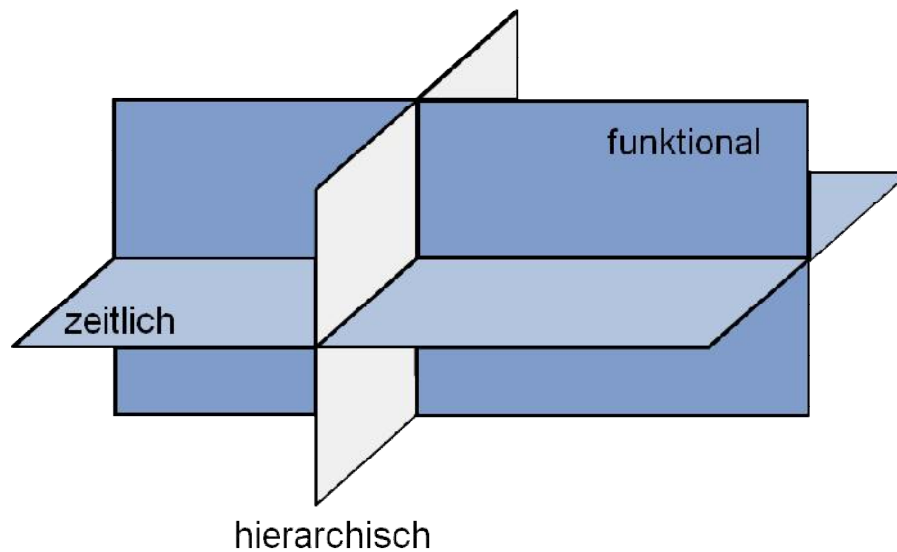

Seite 679, Abb. 83: Beziehungsgeflecht der Marketinginstrumente

## KAPITEL F: ABSATZ UND MARKETING

### 4. DIE INTEGRATION DER MARKETING-INSTRUMENTE ZUM MARKETING-MIX

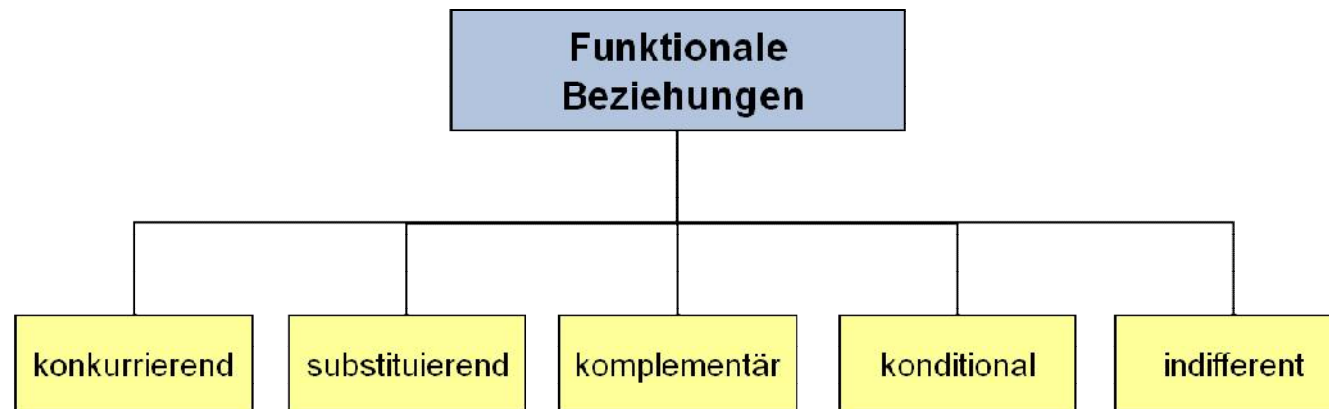

Seite 679, Abb. 83: Funktionale Beziehung

## KAPITEL F: ABSATZ UND MARKETING

### 4. DIE INTEGRATION DER MARKETING-INSTRUMENTE ZUM MARKETING-MIX

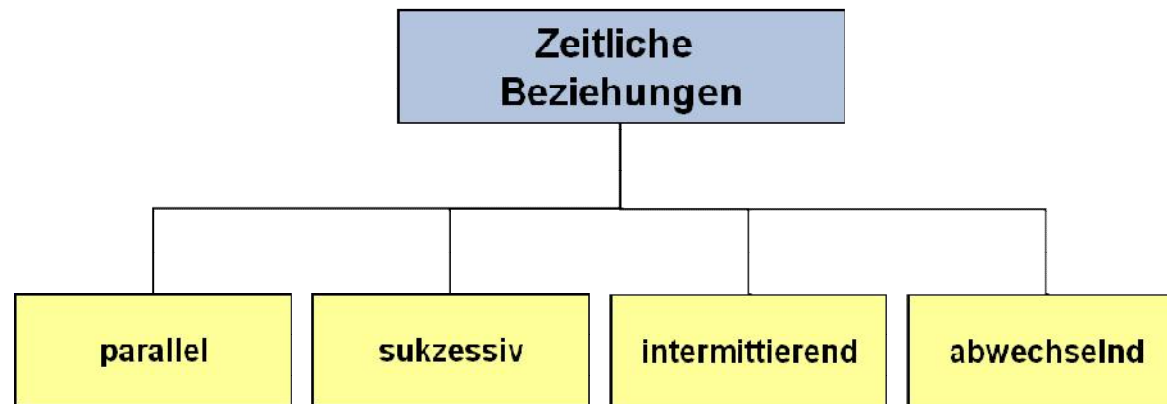

Seite 680, Abb. 85: Zeitliche Beziehungen

## KAPITEL F: ABSATZ UND MARKETING

### 4. DIE INTEGRATION DER MARKETING-INSTRUMENTE ZUM MARKETING-MIX

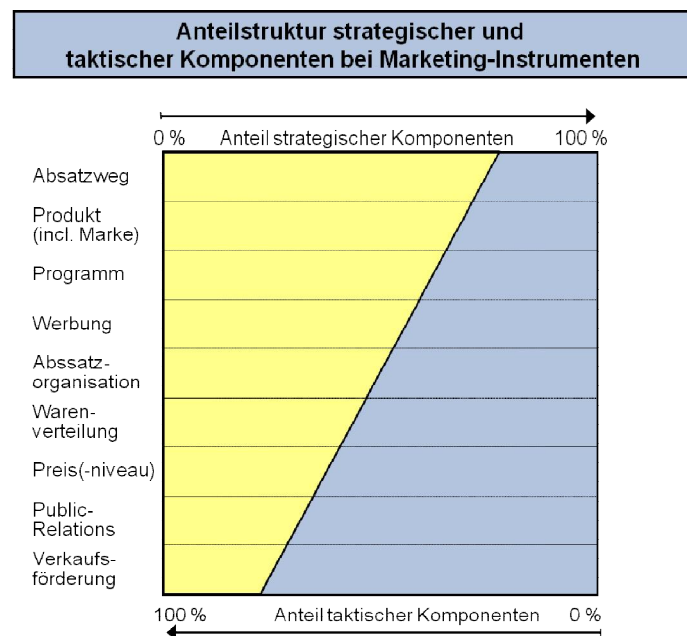

Seite 682, Abb. 86: Anteilsstruktur strategischer und taktischer Komponenten bei Marketing-Instrumenten (Vgl. Becker, J.: Marketing-Konzeption: Grundlagen des strategischen und operativen Marketing-Managements, 6. Aufl., München 1998 , S. 655)

Jung: Allgemeine Betriebswirtschaftslehre. De Gruyter Oldenbourg 2016. ISBN 978-3-486-76376-8

## KAPITEL F: ABSATZ UND MARKETING

### 4. DIE INTEGRATION DER MARKETING-INSTRUMENTE ZUM MARKETING-MIX

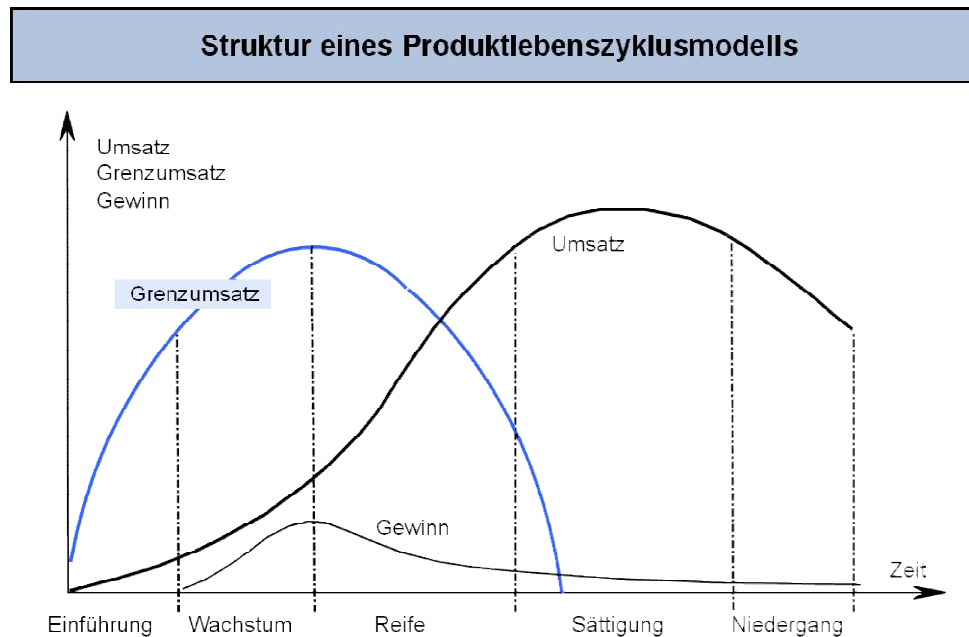

Seite 684, Abb. 87: Die Struktur eines Produktlebenszyklusmodells  
(Vgl. Koppelman, U.: Marketing, 6. Aufl., Heidelberg 2000, S. 99)

## KAPITEL F: ABSATZ UND MARKETING

### 4. DIE INTEGRATION DER MARKETING-INSTRUMENTE ZUM MARKETING-MIX

| Phasen<br>Charakteristika   | Einführung<br>(Introduction) | Wachstum<br>(Growth)                                    | Reife<br>(Maturity)                                                              | Sättigung<br>(Saturation)                                                    | Niedergang<br>(Decline)                          |
|-----------------------------|------------------------------|---------------------------------------------------------|----------------------------------------------------------------------------------|------------------------------------------------------------------------------|--------------------------------------------------|
| <b>Aktivitätsniveau</b>     | sehr hoch                    | hoch                                                    | mittel                                                                           | mittel                                                                       | gering                                           |
| <b>Preispolitik</b>         | hoher Preis                  | hoher Preis, geringe Preisvariation                     | Preisvariation                                                                   | Preisvariation                                                               | fester Preis                                     |
| <b>Werbepolitik</b>         | sehr bedeutend               | bedeutend                                               | noch bedeutend                                                                   | weniger bedeutend                                                            | unbedeutend                                      |
| <b>Produktpolitik</b>       | Produkt unverändert          | leichte Modifikation (Behebung von technischen Mängeln) | Produktverbesserung, -differenzierung, um Attraktivität der Produkte zu steigern | Modifizierung und Differenzierung, um Attraktivität der Produkte zu steigern | neue Produkte (Substitute) drängen auf den Markt |
| <b>Verfolgte Strategien</b> | Kreation eines Neuen Marktes | Ausdehnung des Marktvolumens                            | harter Kampf um Marktanteile. Bildung von Markentreue beim Verbraucher           | harter Kampf um Marktanteile                                                 | Aufrechterhaltung eines Rumpfmärktes             |

Seite 685, Abb. 88: Einige Instrumentalzuordnungen in einem fünfphasigen Produktlebenszyklusmodell (Vgl. Koppelman, U.: Marketing, 6. Aufl., Heidelberg 2000, S. 101)

## KAPITEL F: ABSATZ UND MARKETING

### 4. DIE INTEGRATION DER MARKETING-INSTRUMENTE ZUM MARKETING-MIX

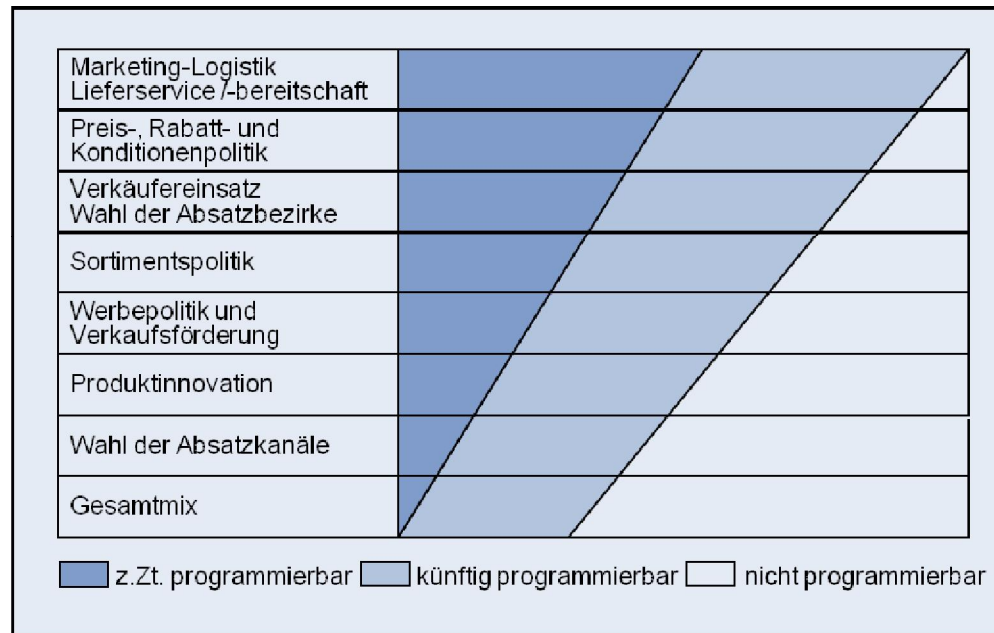

Seite 691, Abb. 89: Zukünftige Entwicklungsmöglichkeiten von Marketingmodellen  
(Vgl. Becker, J.: Marketing-Konzeption : Grundlagen des strategischen und operativen  
Marketing-Managements, 6. Aufl., München 1998, S. 481 ff.)

Jung: Allgemeine Betriebswirtschaftslehre. De Gruyter Oldenbourg 2016. ISBN 978-3-486-76376-8



## KAPITEL F: ABSATZ UND MARKETING

### 4. DIE INTEGRATION DER MARKETING-INSTRUMENTE ZUM MARKETING-MIX

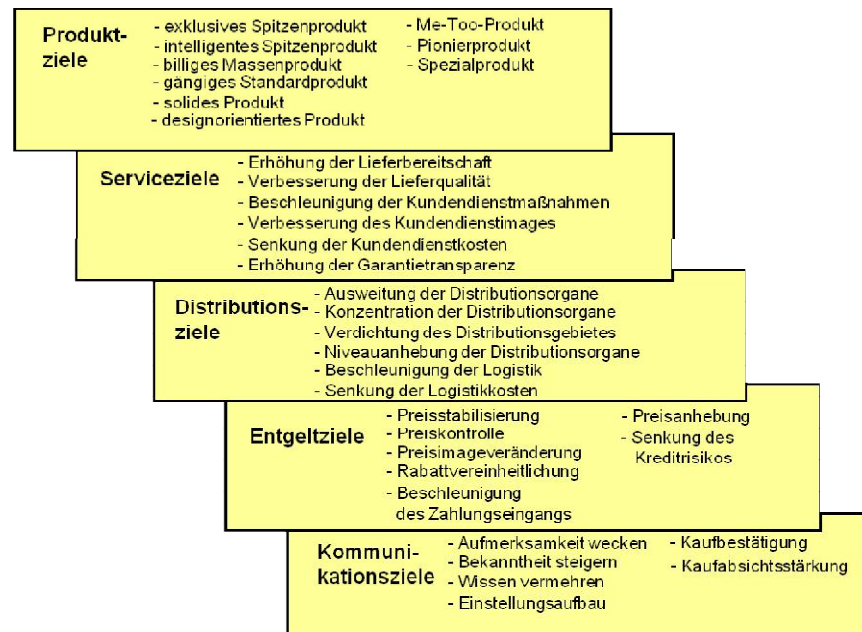

Seite 693, Abb. 90: Mögliche Instrumentalbereichsziele  
(Vgl. Koppelman, U.: Marketing, 6. Aufl., Heidelberg 2000, S. 128)

## KAPITEL F: ABSATZ UND MARKETING

### 4. DIE INTEGRATION DER MARKETING-INSTRUMENTE ZUM MARKETING-MIX

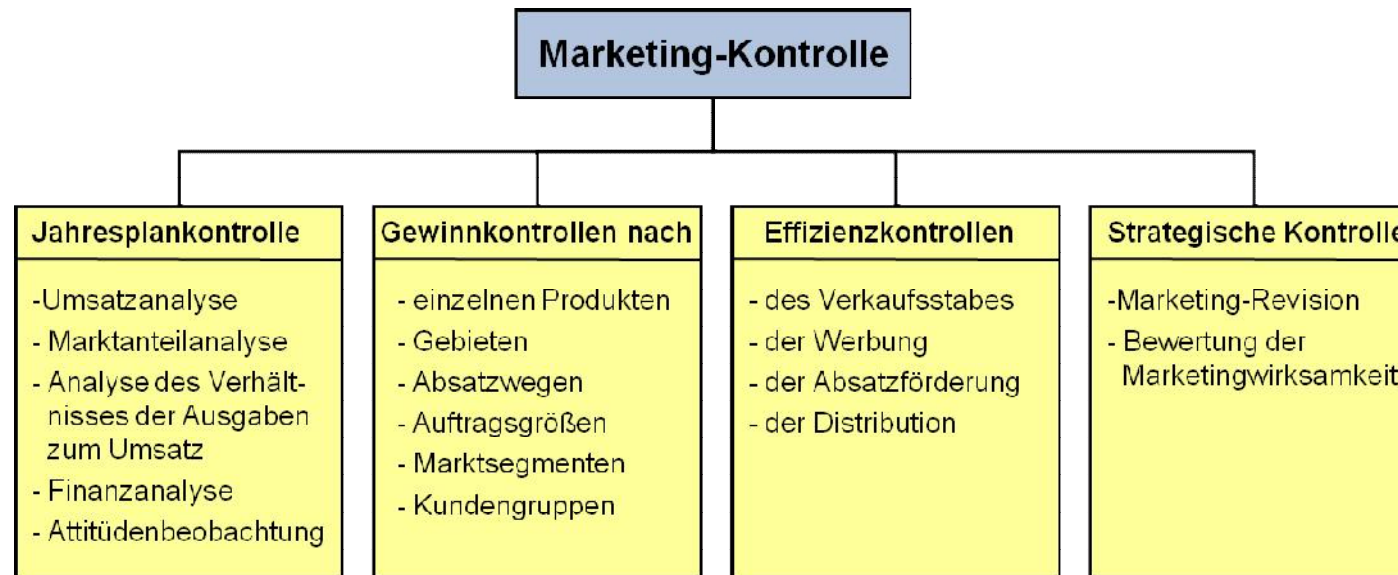

Seite 694, Abb. 91: Arten der Marketing-Kontrolle  
 (Vgl. Ehrmann, H.: Marketing-Controlling: Modernes Marketing für Studium und Praxis,  
Ludwigshafen 1995, S. 298)

## **5. INSTITUTIONELLE BESONDERHEITEN DES MARKETING**

5.1 DAS KONSUMGÜTERMARKETING

5.2 DAS INDUSTRIEGÜTERMARKETING

5.3 DAS DIENSTLEISTUNGSMARKETING

5.4 DAS HANDELSMARKETING

5.5 DAS NON-PROFIT-MARKETING

## **6. AUSBLICK UND KÜNFTIGE ENTWICKLUNG DES MARKETING**

6.1 PARADIGMENWECHSEL IM MARKETING

6.2 MARKETING UND DIE EUROPÄISCHE UNION

6.3 MARKETING UND UMWELT

6.4 MARKETING UND MULTIMEDIA

4.5 MARKETING-KONTROLLE

## KAPITEL F: ABSATZ UND MARKETING

### 6. AUSBLICK UND KÜNFTIGE ENTWICKLUNG DES MARKETING

| <div>3 R's</div> <div>4 P's</div> | Recruitment                                   | Retention                                   | Recovery                                  |
|-----------------------------------|-----------------------------------------------|---------------------------------------------|-------------------------------------------|
| Product                           | Produktverbesserung,<br>Verpackungsgestaltung | Produktdifferenzierung,<br>Sortimentsbreite | Produktinnovation,<br>Produktverbesserung |
| Price                             | Niedrigpreis, Skonti, Boni,<br>Sonderangebote | Preisgarantien,<br>Preisbündelung           | Rabatte, Boni,<br>Sonderkonditionen       |
| Promotion                         | Verkaufsförderung,<br>Direct Mailing          | Kundenzeitschriften,<br>Kundenclubs         | Telefonmarketing,<br>Direct Mail          |
| Place                             | Direktvertrieb,<br>Verkaufsgespräche          | Direktvertrieb,<br>Lieferservice            | Exklusivvertrieb,<br>Online-Vertrieb      |

Seite 700, Abb. 92: Systematisierung der Marketinginstrumente nach den 3R's im Marketing (Vgl. Bruhn, M.: Marketing, 7. Aufl., Wiesbaden 2004, S. 32)

## KAPITEL F: ABSATZ UND MARKETING

### 6. AUSBLICK UND KÜNFTIGE ENTWICKLUNG DES MARKETING

| Investitionshöhe für den Umweltschutz im<br>Produzierenden Gewerbe 2012 |           |
|-------------------------------------------------------------------------|-----------|
| <b>Abfallwirtschaft</b>                                                 | 887.953   |
| <b>Gewässerschutz</b>                                                   | 3.041.032 |
| <b>Lärmbekämpfung</b>                                                   | 75.307    |
| <b>Luftreinhaltung</b>                                                  | 624.092   |
| <b>Naturschutz und Landschaftspflege</b>                                | 75.477    |
| <b>Bodensanierung</b>                                                   | 55.750    |
| <b>Klimaschutz</b>                                                      | 2.461.177 |
| <b>Gesamt</b>                                                           | 7.220.788 |

Seite 705, Abb. 93: Investitionen für den Umweltschutz in EUR  
(Vgl. Statistisches Bundesamt, Statistisches Jahrbuch 2015, S. 444 f)
