# Supplementary material
Source: publisher site journal article supplement (https://www.degruyterbrill.com/publication/isbn/9783486989434/downloadAsset/9783486989434_Folien--de.zip)
Supplement: Supplementary file 7 [file Teil_G_ABWL.pdf › Teil_G_ABWL.pdf]

[illegible]

## KAPITEL G: KAPITALWIRTSCHAFT

1. EINFÜHRUNG IN DIE KAPITALWIRTSCHAFT
2. GRUNDLAGEN DER KAPITALWIRTSCHAFT
3. DER KAPITALBEDARF
4. KAPITALBESCHAFFUNG
5. VERMÖGENS- UND KAPITALSTRUKTURGESTALTUNG
6. DIE KAPITALVERWENDUNG

## **2. GRUNDLAGEN DER KAPITALWIRTSCHAFT**

### **2.1 BETRIEBLICHER UMSATZPROZESS ALS BASISKOMPONENTE**

### **2.2 FINANZWIRTSCHAFTLICHE BEGRIFFE**

## KAPITEL G: KAPITALWIRTSCHAFT

### 2. GRUNDLAGEN DER KAPITALWIRTSCHAFT

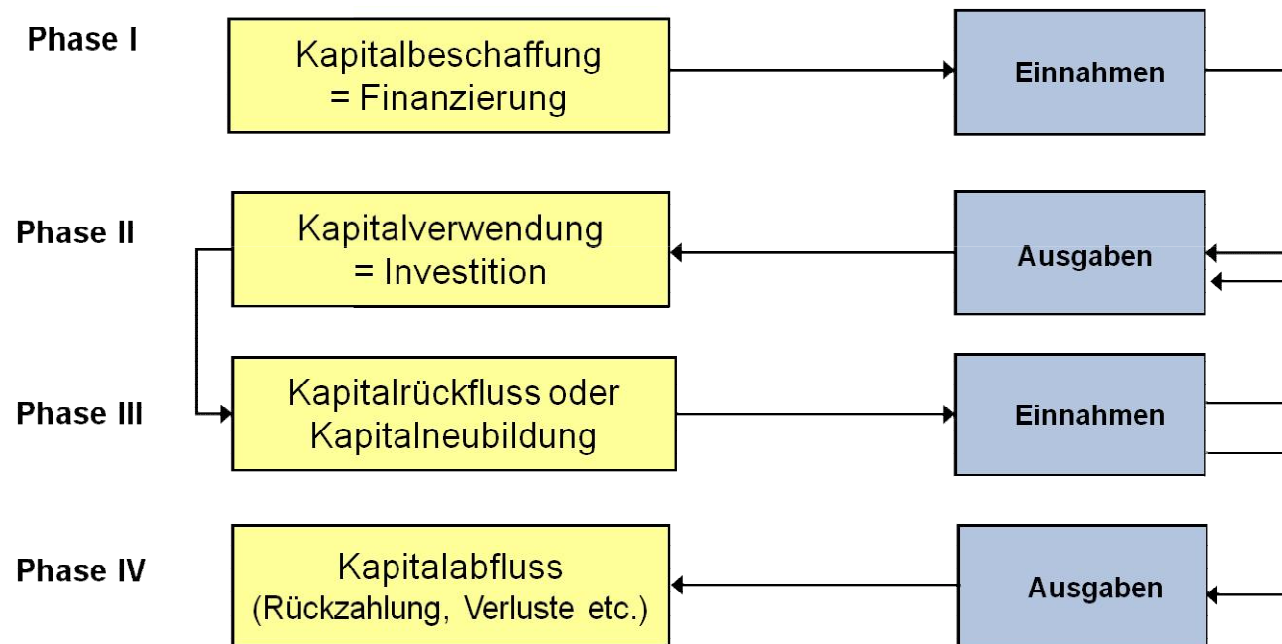

Seite 717, Abb. 1: Der Betriebsprozess

## **3. DER KAPITALBEDARF**

3.1 BEGRIFF UND WESEN DES KAPITALBEDARFS

3.2 DIE EINFLUSSFAKTOREN DES KAPITALBEDARFS

3.3 DIE ERMITTLUNG DES KAPITALBEDARFS

## KAPITEL G: KAPITALWIRTSCHAFT

### 3. DER KAPITALBEDARF

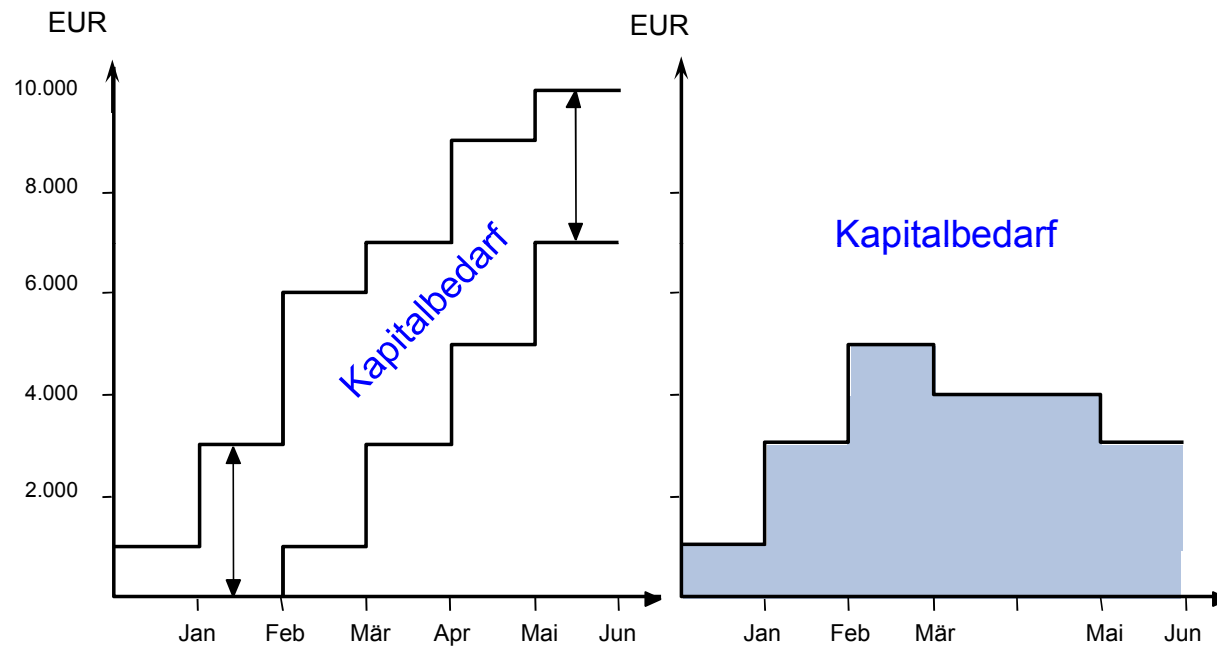

Seite 720, Abb. 2: Der Kapitalbedarf

# KAPITEL G: KAPITALWIRTSCHAFT

## 3. DER KAPITALBEDARF

| Finanzplanung                                                 | Januar | Februar | März |
|---------------------------------------------------------------|--------|---------|------|
| <b>Zahlungsmittelbestand der Vorperiode</b>                   |        |         |      |
| <b>Auszahlungen</b>                                           |        |         |      |
| Auszahlungen laufende Geschäfte                               |        |         |      |
| - Gehälter, Löhne                                             |        |         |      |
| - Rohstoffe                                                   |        |         |      |
| - Hilfsstoffe                                                 |        |         |      |
| - Betriebsstoffe                                              |        |         |      |
| - Frachten usw.                                               |        |         |      |
| Auszahlungen für Investitionszwecke                           |        |         |      |
| - Sachinvestitionen                                           |        |         |      |
| - Finanzinvestitionen                                         |        |         |      |
| Auszahlungen im Rahmen des Finanzverkehrs                     |        |         |      |
| - Kreditrückzahlung                                           |        |         |      |
| - Akzeptierteinlösung                                         |        |         |      |
| - Eigenkapitalherabsetzung                                    |        |         |      |
| <b>Einzahlungen</b>                                           |        |         |      |
| Einzahlungen aus ordentlichen Umsätzen                        |        |         |      |
| - Barverkäufe                                                 |        |         |      |
| - Begleichung von Forderungen aus Lieferungen und Leistungen  |        |         |      |
| Einzahlungen aus Desinvestitionen                             |        |         |      |
| - Anlagenverkäufe                                             |        |         |      |
| - Auflösung von Finanzinvestitionen                           |        |         |      |
| Einzahlungen aus Finanzerträgen                               |        |         |      |
| - Zinserträge                                                 |        |         |      |
| - Beteiligungserträge                                         |        |         |      |
| <b>Ermittlung der Über- und Unterdeckung</b>                  |        |         |      |
| <b>Ausgleichs- und Anpassungsmaßnahmen</b>                    |        |         |      |
| Bei Unterdeckung                                              |        |         |      |
| - Kreditaufnahme                                              |        |         |      |
| - Eigenkapitalerhöhung                                        |        |         |      |
| - Rückfluss gewährter Darlehen                                |        |         |      |
| - zusätzliche Desinvestitionen                                |        |         |      |
| Bei Überdeckung                                               |        |         |      |
| - Kreditrückführung                                           |        |         |      |
| - Anlage in liquide Mittel                                    |        |         |      |
| <b>Zahlungsmittelbestand am Periodenende</b>                  |        |         |      |
| nach Berücksichtigung der Ausgleichs- und Anpassungsmaßnahmen |        |         |      |

Seite 728, Abb. 3: Der Finanzplan

## KAPITEL G: KAPITALWIRTSCHAFT

### 3. DER KAPITALBEDARF

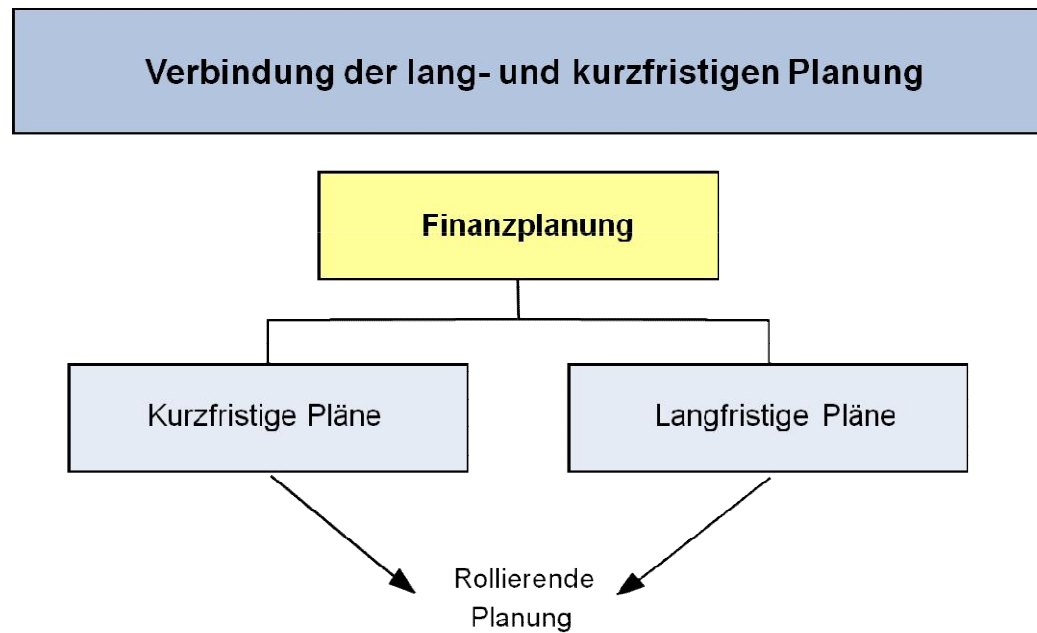

Seite 729, Abb. 4: Verbindung der langfristigen und kurzfristigen Planung



## KAPITEL G: KAPITALWIRTSCHAFT

### 3. DER KAPITALBEDARF

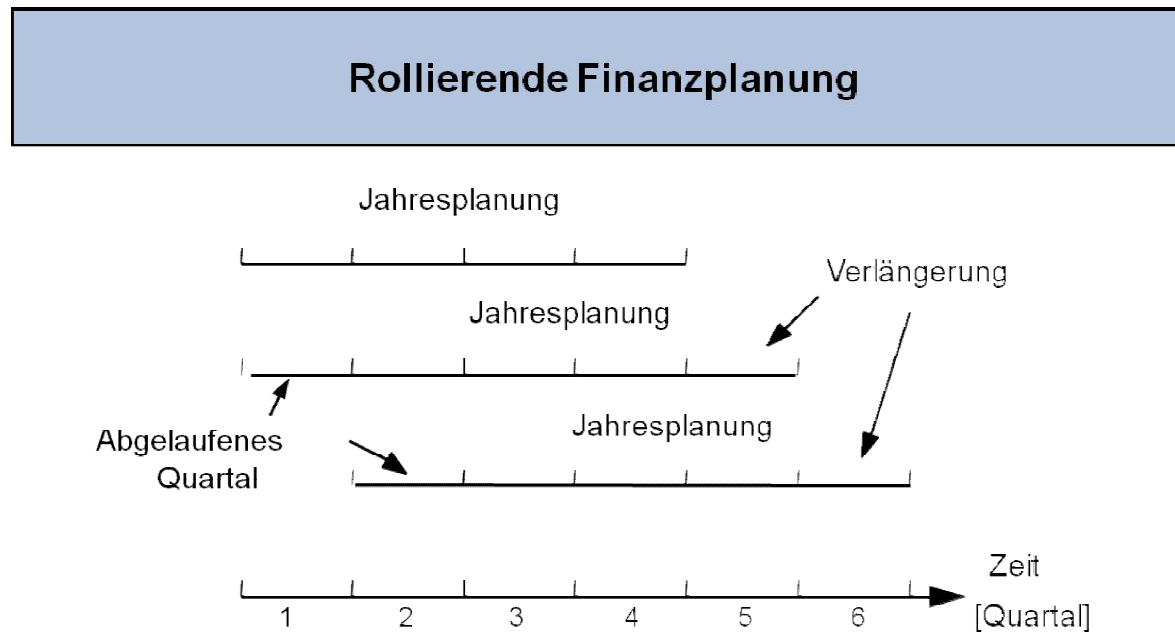

Seite 729, Abb. 5: Rollierende Finanzplanung

## **4. KAPITALBESCHAFFUNG**

### **4.1 BETEILIGUNGSFINANZIERUNG**

### **4.2 DIE FREMDFINANZIERUNG**

### **4.3 DIE INNENFINANZIERUNG**

### **4.4 FINANZMARKETING**

## KAPITEL G: KAPITALWIRTSCHAFT

### 4. KAPITALBESCHAFFUNG

| <div> <div>Herkunft des Kapitals</div> <div>Rechtliche Qualität</div> </div> | Außenfinanzierung        | Innenfinanzierung                                                   |
|------------------------------------------------------------------------------|--------------------------|---------------------------------------------------------------------|
| Eigenfinanzierung                                                            | Beteiligungsfinanzierung | Selbstfinanzierung<br><br>Finanzierung aus Abschreibungsgegenwerten |
| Fremdfinanzierung                                                            | Kreditfinanzierung       | Finanzierung über Rückstellungen                                    |

Seite 730, Abb. 6: Finanzierungsmöglichkeiten

## KAPITEL G: KAPITALWIRTSCHAFT

### 4. KAPITALBESCHAFFUNG

| Deutsche Unternehmen 2013 - Anzahl und Umsatz nach Rechtsformen |                              |            |                                                     |            |
|-----------------------------------------------------------------|------------------------------|------------|-----------------------------------------------------|------------|
| Rechtsform                                                      | Steuerpflichtige Unternehmen |            | Umsätze der Unternehmen (Lieferungen u. Leistungen) |            |
|                                                                 | Anzahl                       | %          | Mio. EUR                                            | %          |
| Einzelunternehmen                                               | 2.198.392                    | 65,8       | 561.691                                             | 9,7        |
| GmbH (incl. UG)                                                 | 535.969                      | 15,5       | 2.215.900                                           | 39,0       |
| OHG (incl. BGR)                                                 | 273.087                      | 7,4        | 186.182                                             | 3,2        |
| KG                                                              | 153.034                      | 4,7        | 1.302.061                                           | 22,0       |
| AG                                                              | 8.040                        | 0,2        | 1.019.170                                           | 17,7       |
| Genossenschaften                                                | 5.553                        | 0,1        | 67.180                                              | 1,2        |
| Sonstige Rechtsformen                                           | 251.463                      | 6,3        | 413.383                                             | 7,2        |
| <b>Σ Rechtsformen</b>                                           | <b>3.243.538</b>             | <b>100</b> | <b>5.765.567</b>                                    | <b>100</b> |

Seite 735, Abb. 7: Anzahl und Umsatz deutscher Unternehmen  
(Vgl. Statistische Bundesamt (Hrsg.): Statistisches Jahrbuch 2015, Wiesbaden 2015, S. 275)

## KAPITEL G: KAPITALWIRTSCHAFT

### 4. KAPITALBESCHAFFUNG

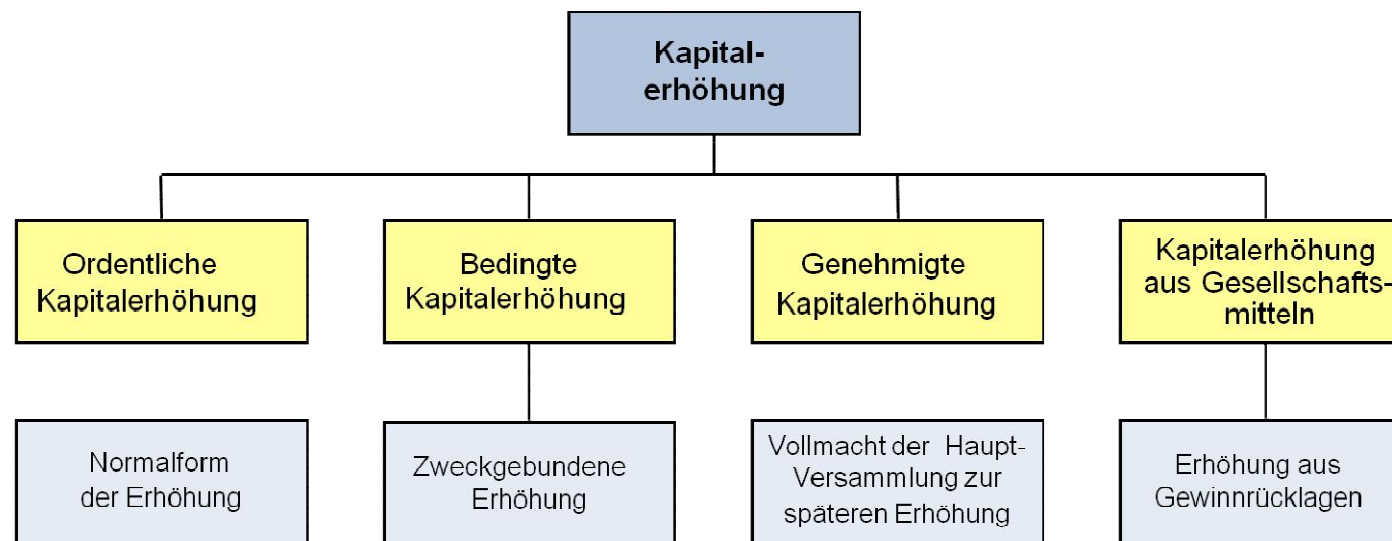

Seite 741, Abb. 8: Kapitalerhöhungsformen

## KAPITEL G: KAPITALWIRTSCHAFT

### 4. KAPITALBESCHAFFUNG

| Branche        | 2000        | 2002        | 2004        | 2006        | 2008        | 2010        | 2011        | 2012        |
|----------------|-------------|-------------|-------------|-------------|-------------|-------------|-------------|-------------|
| Maschinenbau   | 22,6        | 25,5        | 26,1        | 26,7        | 27,0        | 28,4        | 29,3        | 30,0        |
| Fahrzeugbau    | 25,4        | 29,6        | 26,5        | 25,0        | 25,6        | 27,2        | 26,5        | 26,7        |
| Elektrotechnik | 25,8        | 26,9        | 27,6        | 26,9        | 27,6        | 28,9        | 29,3        | 29,8        |
| Baugewerbe     | 4,8         | 5,5         | 8,2         | 11,0        | 10,7        | 12,2        | 13,7        | 14,3        |
| Chemie         | 34,1        | 36,8        | 36,2        | 33,6        | 35,0        | 35,2        | 38,2        | 38,8        |
| Textil         | 24,1        | 26,8        | 32,1        | 33,7        | 33,4        | 35,0        | 34,1        | 35,9        |
| Großhandel     | 17,8        | 20,4        | 23,2        | 24,5        | 26,2        | 28,0        | 28,7        | 29,7        |
| Einzelhandel   | 10,5        | 11,7        | 15,2        | 17,4        | 16,2        | 18,4        | 21,5        | 22,1        |
| <b>Gesamt</b>  | <b>20,2</b> | <b>22,4</b> | <b>24,4</b> | <b>24,6</b> | <b>25,1</b> | <b>27,2</b> | <b>27,4</b> | <b>28,0</b> |

Seite 742, Abb. 9: Eigenkapitalquoten

(Vgl. Deutsche Bundesbank: Hochgerechnete Angaben aus Jahresabschlüssen deutscher Unternehmen, Statistische Sonderveröffentlichung 5, Mai 2015)

*Jung: Allgemeine Betriebswirtschaftslehre. De Gruyter Oldenbourg 2016. ISBN 978-3-486-76376-8*

## KAPITEL G: KAPITALWIRTSCHAFT

### 4. KAPITALBESCHAFFUNG

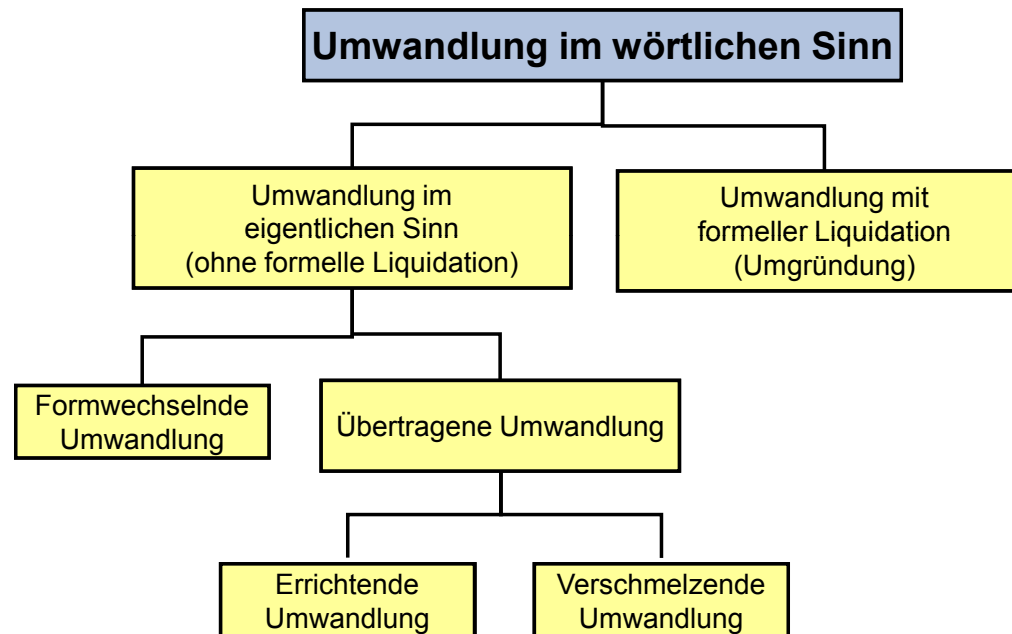

Seite 750, Abb. 10: Umwandlung der Rechtsform

## KAPITEL G: KAPITALWIRTSCHAFT

### 4. KAPITALBESCHAFFUNG

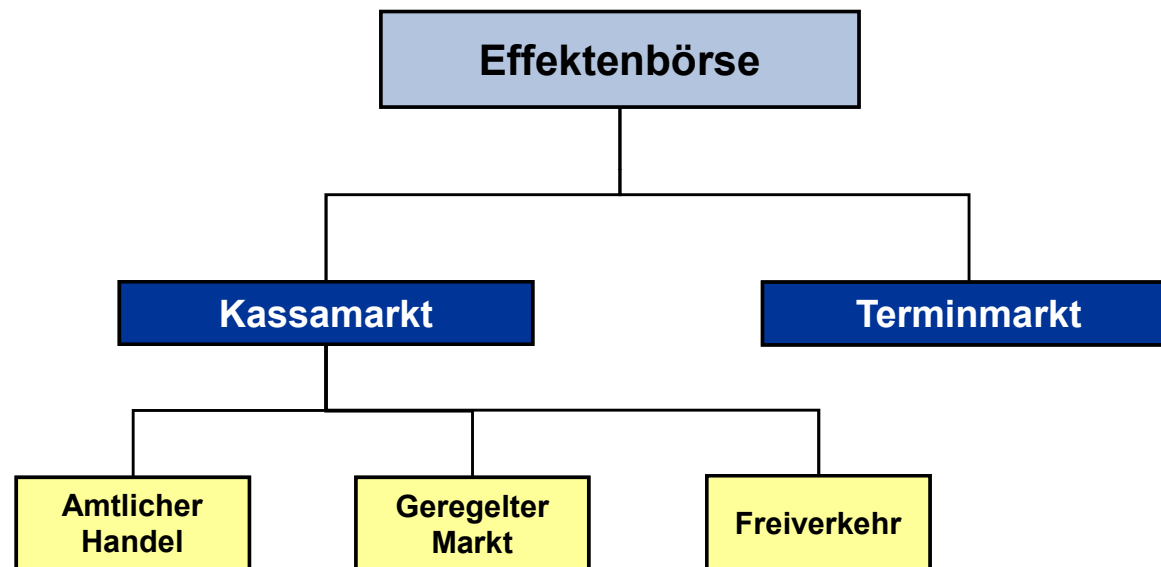

Seite 752, Abb. 11: Strukturierung der Effektbörse



## KAPITEL G: KAPITALWIRTSCHAFT

### 4. KAPITALBESCHAFFUNG

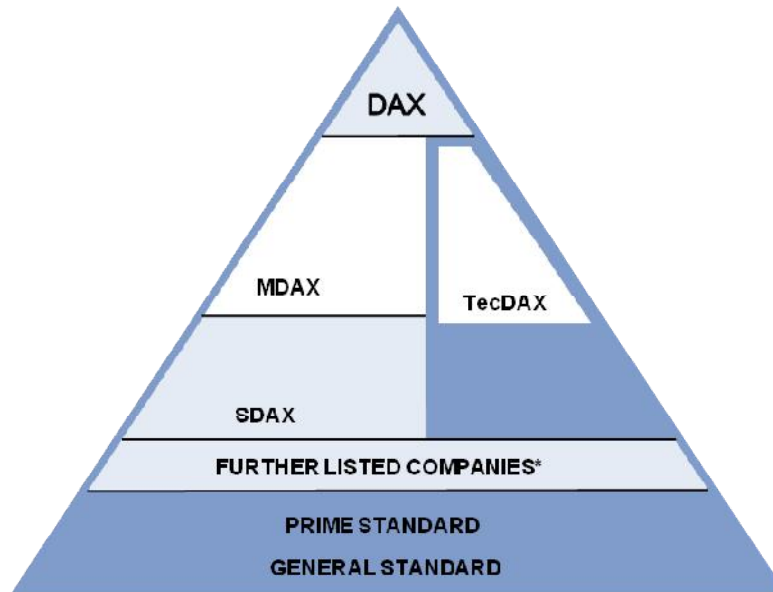

\* Weitere gelistete Unternehmen

Seite 754, Abb. 12: Index-Pyramide

## KAPITEL G: KAPITALWIRTSCHAFT

### 4. KAPITALBESCHAFFUNG

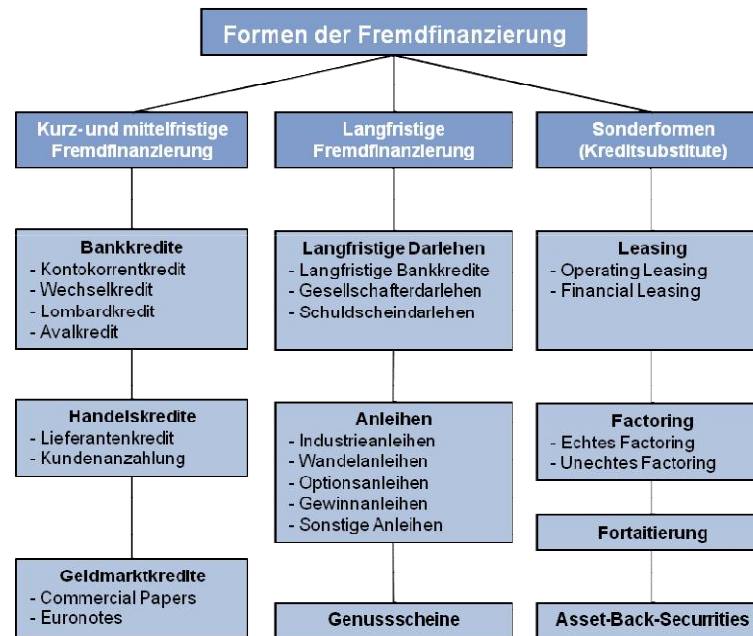

Seite 758, Abb. 13: Formen der Fremdfinanzierung

## KAPITEL G: KAPITALWIRTSCHAFT

### 4. KAPITALBESCHAFFUNG

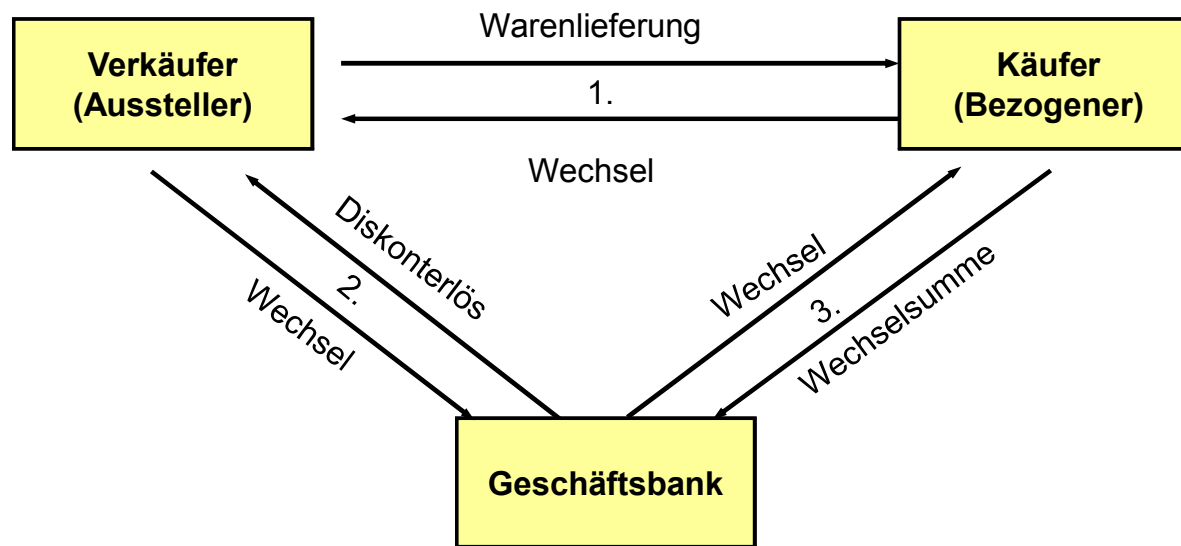

Seite 761, Abb. 14: Beziehungen beim Wechsel

## KAPITEL G: KAPITALWIRTSCHAFT

### 4. KAPITALBESCHAFFUNG

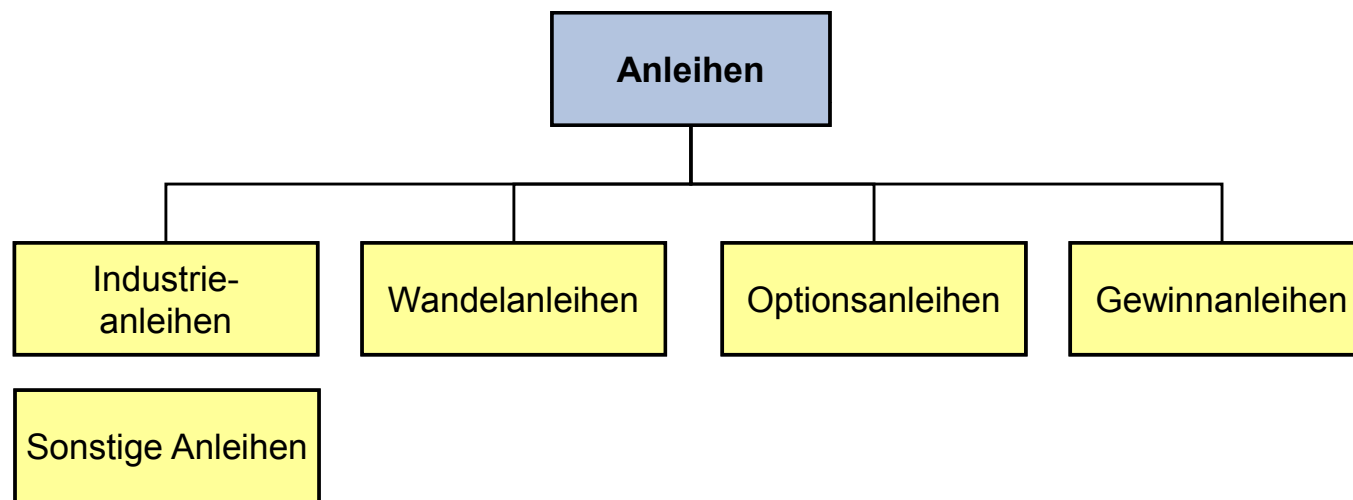

Seite 768, Abb. 15: Formen der Schuldverschreibungen

## KAPITEL G: KAPITALWIRTSCHAFT

### 4. KAPITALBESCHAFFUNG

| Grundgeschäfte der Optionen                     | Eigenschaften                                                                                                                                                                                                                                             |
|-------------------------------------------------|-----------------------------------------------------------------------------------------------------------------------------------------------------------------------------------------------------------------------------------------------------------|
| <b>Kauf einer Kaufoption (Long Call)</b>        | – Der Verkäufer setzt auf einen steigenden Aktienkurs und sichert sich das Recht, bei einem Kauf eine bestimmte Anzahl an Aktien in der Zukunft zu einem vereinbarten niedrigen Basispreis von heute kaufen zu können.                                    |
| <b>Verkauf einer Kaufoption (Short Call)</b>    | – Der Verkäufer rechnet mit einem stabilen bis sinkendem Aktienkurs, um bei einem Verkauf den Gewinnausfall/Verlust zu vermeiden oder sein Einnahmeausfall/Verlust um die Optionsprämie zu mindern, wenn der Optionskäufer auf sein Wahlrecht verzichtet. |
| <b>Kauf einer Verkaufsoption (Long Put)</b>     | – Der Aktienkäufer erwartet ein Sinken des Aktienkurses und sichert den Basispreis für die Dauer der Option.<br>– Er kauft, wenn der Börsenkurs kleiner ist als der Basispreis.                                                                           |
| <b>Verkauf einer Verkaufsoption (Short Put)</b> | – Der Verkäufer erwartet einen stabilen bis steigenden Börsenkurs.                                                                                                                                                                                        |

Seite 774, Abb. 16: Grundgeschäfte der Optionen und deren Eigenschaften

## KAPITEL G: KAPITALWIRTSCHAFT

### 4. KAPITALBESCHAFFUNG

Long Call – Kauf einer Kaufoption

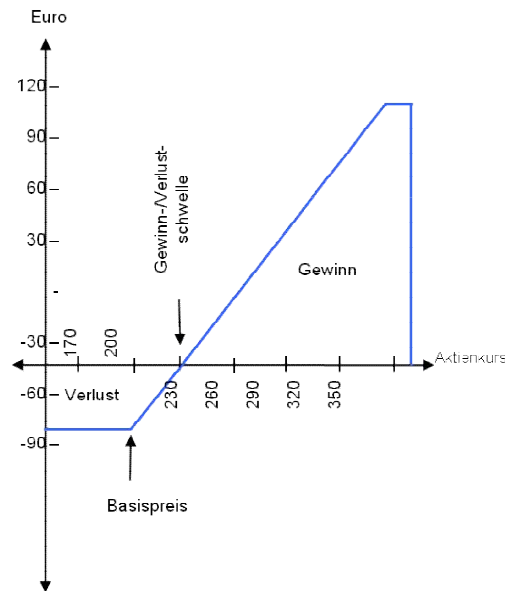

Short Call – Verkauf einer Kaufoption

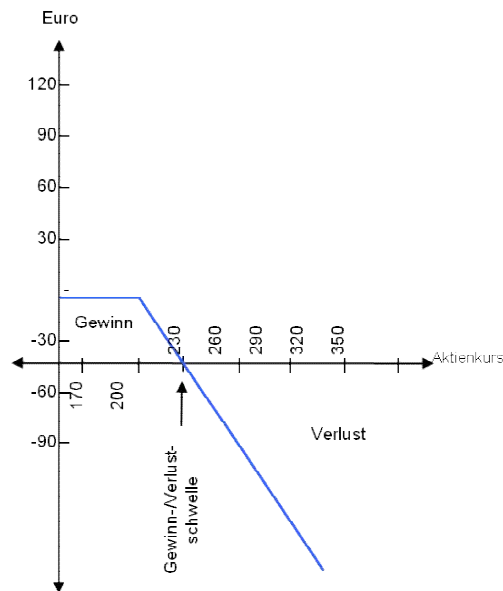

Seite 775, Abb. 17: Grundgeschäfte einer Call-Option  
(Vgl. May, H.: Geldanlage. Vermögensbildung, 2. Aufl., München / Wien 2004, S. 142ff)

## KAPITEL G: KAPITALWIRTSCHAFT

### 4. KAPITALBESCHAFFUNG

**Long Put – Kauf einer Verkaufsoption    Short Put – Verkauf einer Verkaufsoption**

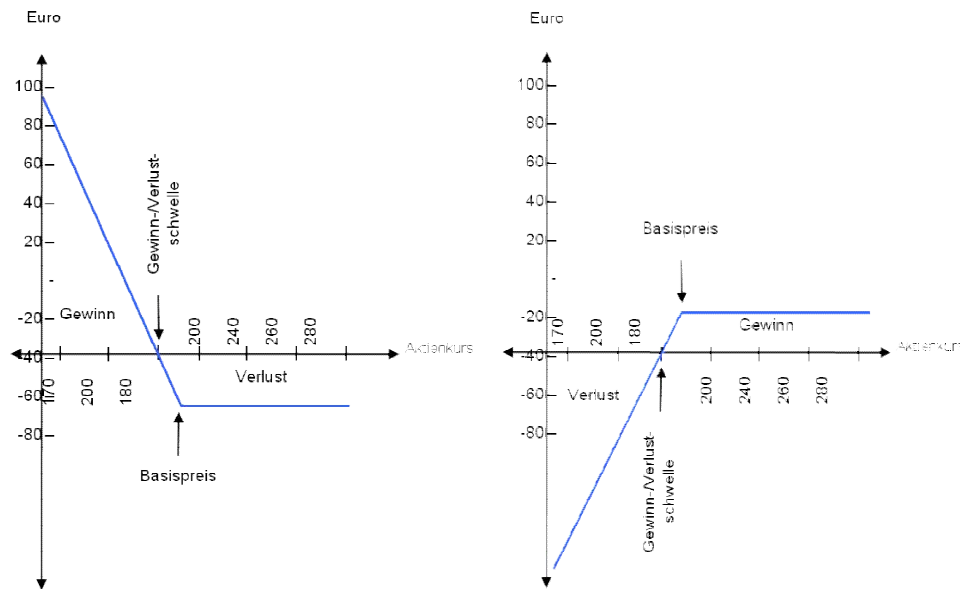

Seite 775, Abb. 18: Grundgeschäfte einer Put-Option

## KAPITEL G: KAPITALWIRTSCHAFT

### 4. KAPITALBESCHAFFUNG

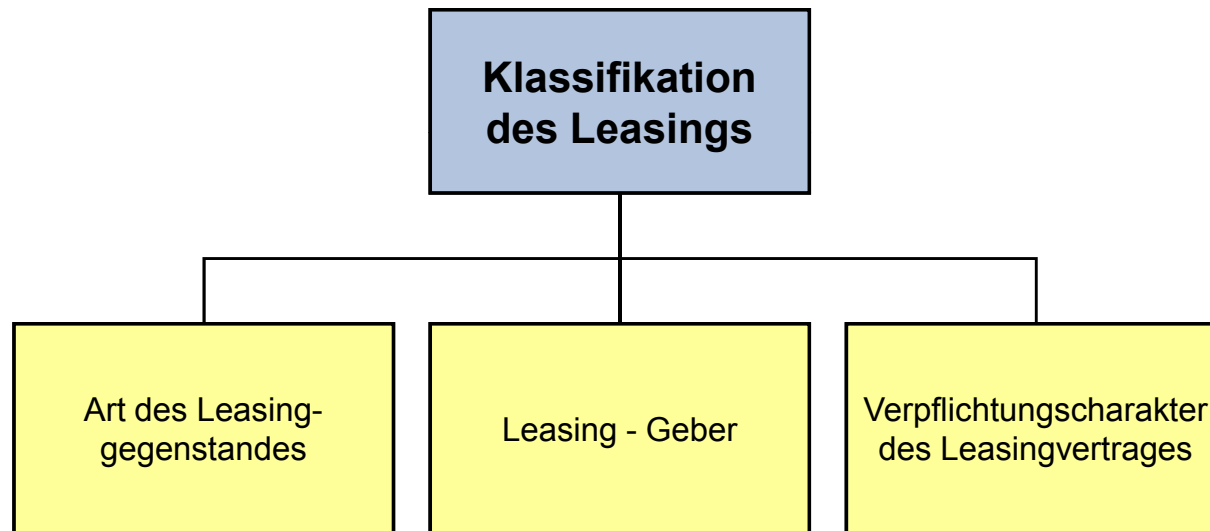

Seite 778, Abb. 19: Leasingklassifikation



## KAPITEL G: KAPITALWIRTSCHAFT

### 4. KAPITALBESCHAFFUNG

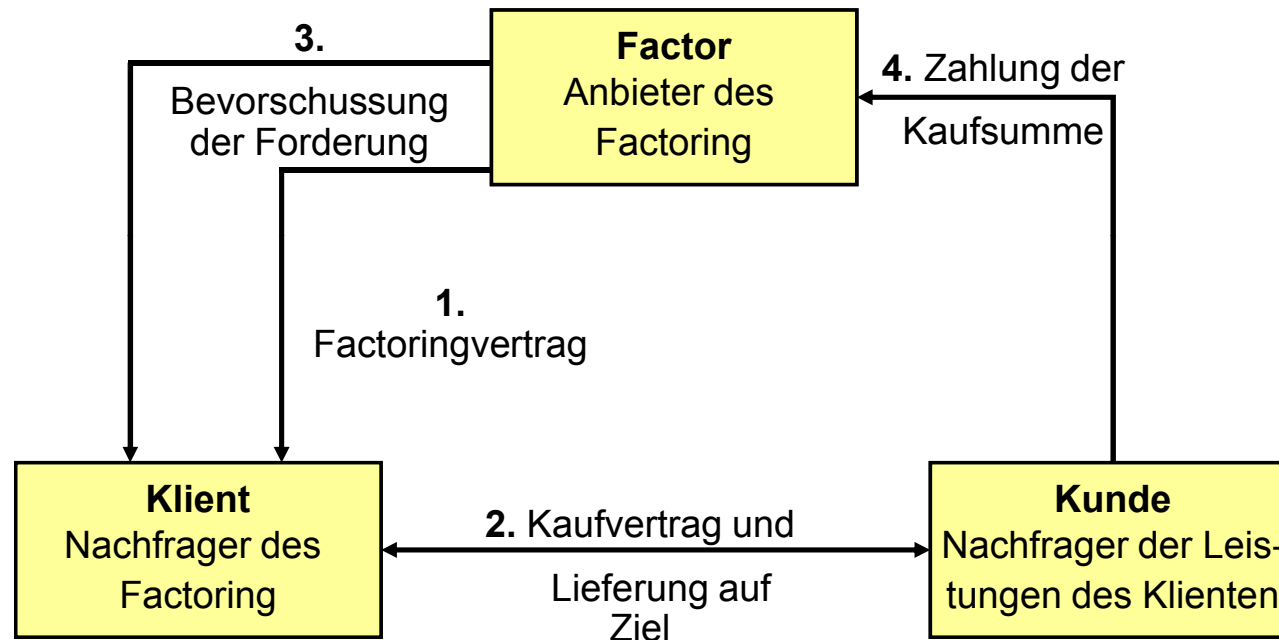

Seite 781, Abb. 20: Beziehungen zwischen den Factoringteilnehmern

## KAPITEL G: KAPITALWIRTSCHAFT

### 4. KAPITALBESCHAFFUNG

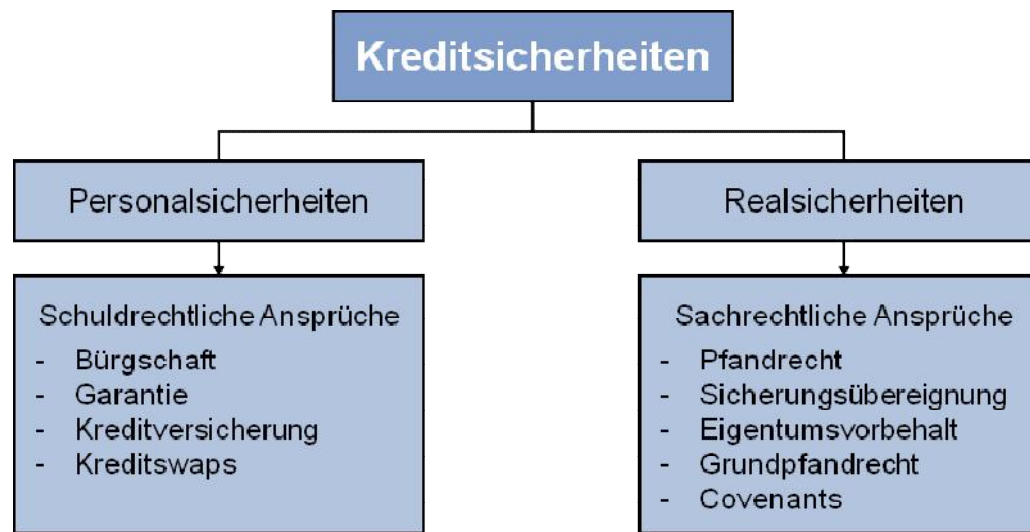

Seite 783, Abb. 21: Kreditsicherheiten

## KAPITEL G: KAPITALWIRTSCHAFT

### 4. KAPITALBESCHAFFUNG

| Arten                          | Inhalt                                                                      | Beispiele                                                                                                                             |
|--------------------------------|-----------------------------------------------------------------------------|---------------------------------------------------------------------------------------------------------------------------------------|
| <b>Information Covenants</b>   | Informationspflichten des Kreditnehmers an den Kreditgeber                  | Jahresabschlussinformationen<br>Quartalsberichte<br>Planungsdaten<br>Steuererklärung                                                  |
| <b>Financial Covenants</b>     | Verpflichtung zur nach-haltigen Erfüllung finanzwirtschaftlicher Kennzahlen | Eigenkapitalklauseln<br>Verschuldungsklauseln<br>Zinsdecksklauseln<br>Liquiditätsklauseln                                             |
| <b>Non-financial Covenants</b> | Unternehmenspolitische Verhaltenspflichten des Kreditnehmers                | Verkaufsverbot für Vermögen<br>Begrenzung von Investitionsprojekten<br>Obergrenzen für Dividende<br>Verbot von Mergers & Acquisitions |

Seite 786, Abb. 22: Zusatzvereinbarungen (Covenants) in Kreditverträgen  
(Vgl. Pape, U.: Grundlagen der Finanzierung und Investition, 3. Aufl., München 2015, S. 143)

## KAPITEL G: KAPITALWIRTSCHAFT

### 4. KAPITALBESCHAFFUNG

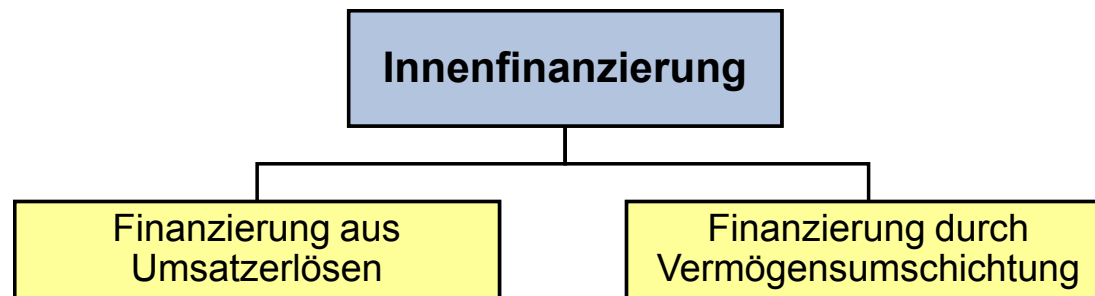

Seite 787, Abb. 23: Innenfinanzierung

## KAPITEL G: KAPITALWIRTSCHAFT

### 4. KAPITALBESCHAFFUNG

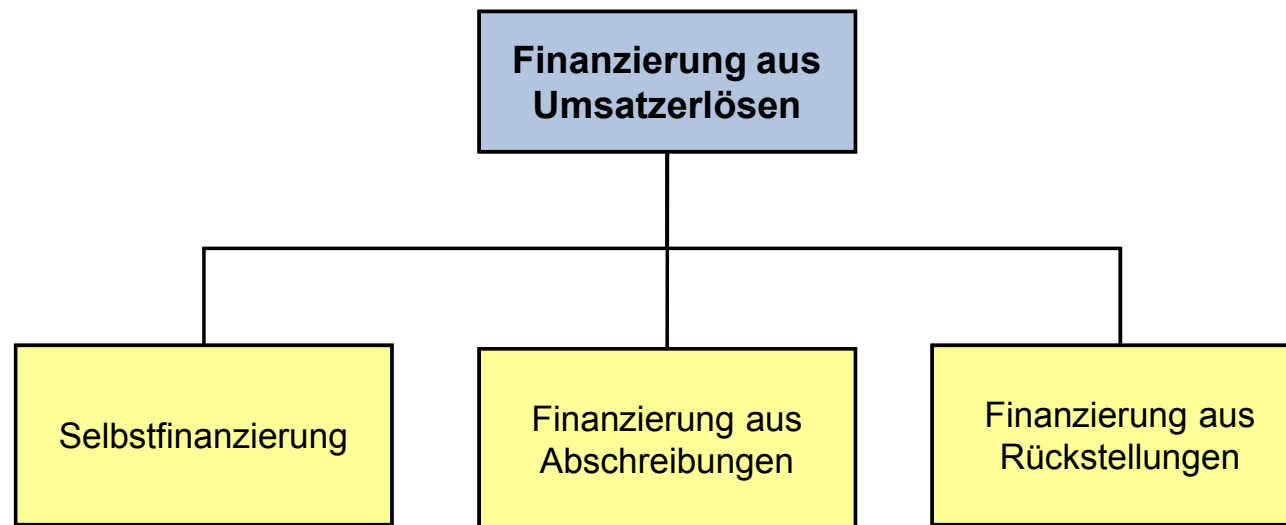

Seite 787, Abb. 24: Möglichkeit der Finanzierung aus Umsatzerlösen

## KAPITEL G: KAPITALWIRTSCHAFT

### 4. KAPITALBESCHAFFUNG

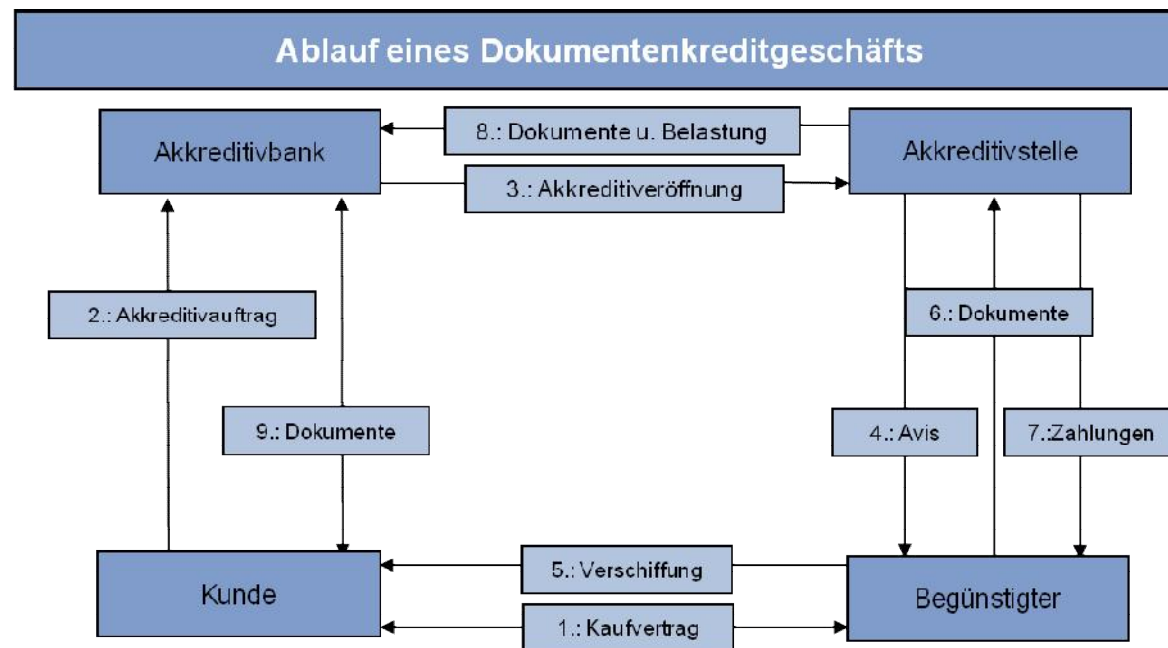

Seite 794, Abb. 25: Ablauf eines Dokumentenakkreditivs

## KAPITEL G: KAPITALWIRTSCHAFT

### 4. KAPITALBESCHAFFUNG

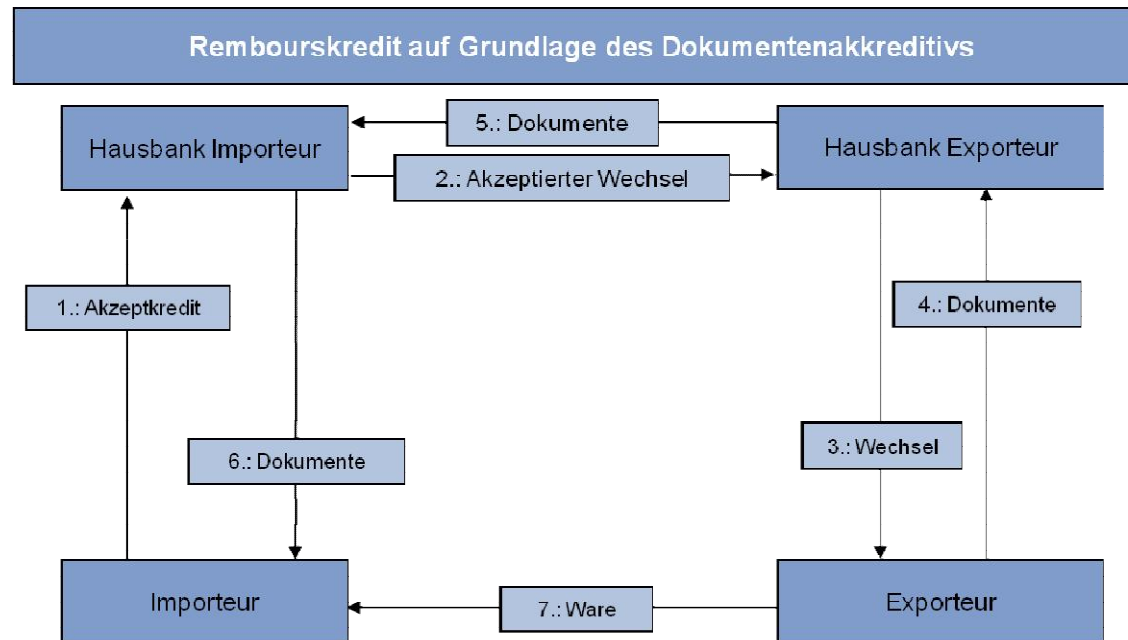

Seite 794, Abb. 26: Rembourskredit auf der Grundlage eines Dokumentenakkreditivs

## **5. VERMÖGENS- UND KAPITALSTRUKTURGESTALTUNG**

5.1 RISIKO DES EINGESETZTEN KAPITALS

5.2 BEDEUTUNG DER FRISTIGKEIT DES KAPITALS

5.3 BEDEUTUNG DER VERMÖGENSSTRUKTUR

5.4 FINANZIERUNGSREGELN

5.5 FINANZIERUNGSKOSTEN EINZELNER FINANZIERUNGSFORMEN

5.6 KAPITALKOSTEN BEI GEMISCHTER FINANZIERUNG UND DIE OPTIMALE  
KAPITALSTRUKTUR (OPTIMALER VERSCHULDUNGSGRAD)



## KAPITEL G: KAPITALWIRTSCHAFT

### 5. VERMÖGENS- UND KAPITALSTRUKTURGESTALTUNG

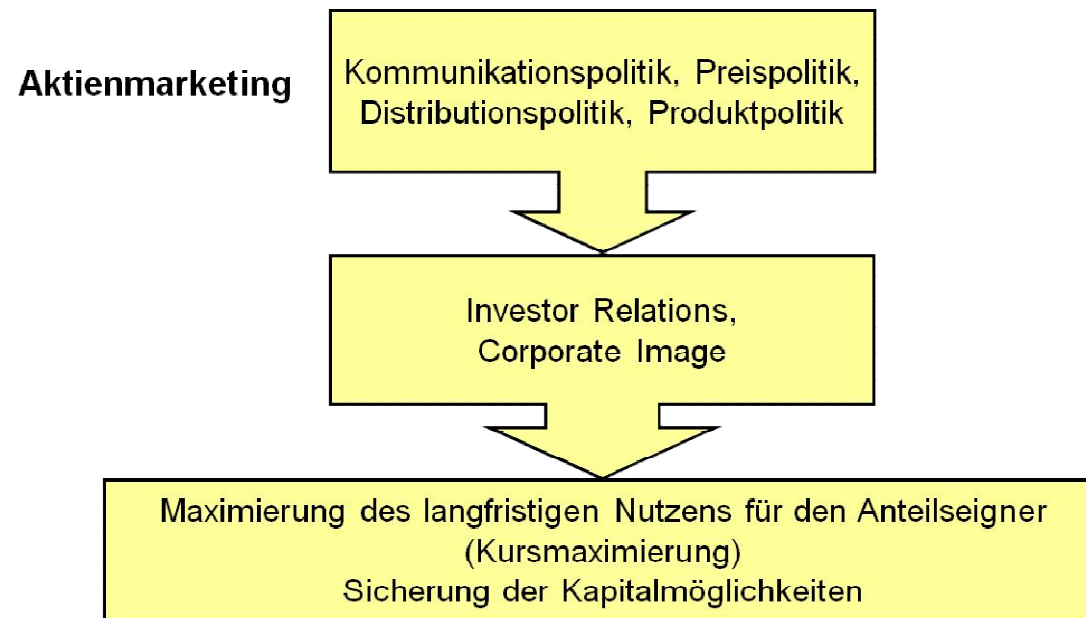

Seite 796, Abb. 27: Zielsetzung des Aktienmarketing

## KAPITEL G: KAPITALWIRTSCHAFT

### 5. VERMÖGENS- UND KAPITALSTRUKTURGESTALTUNG

| Standard & Poor's Rating |     |      | Schuldnersicherheit | Moody's Rating |      |      |
|--------------------------|-----|------|---------------------|----------------|------|------|
| AAA                      |     |      | Absolut sicher      | Aaa            |      |      |
| AA+                      | AA  | AA-  | Sehr sicher         | Aa1            | Aa2  | Aa3  |
| A+                       | A   | A-   | Sicher              | A1             | A2   | A3   |
| BBB+                     | BBB | BBB- | Befriedigend        | Baa1           | Baa2 | Baa3 |
| BB+                      | BB  | BB-  | Spekulativ          | Ba1            | Ba2  | Ba3  |
| B+                       | B   | B-   | Sehr Spekulativ     | B1             | B2   | B3   |
| CCC                      | CC  | C    | Hoch spekulativ     | Caa            | Ca   | C    |
| C                        |     |      | Zahlungsverzug      | D              |      |      |

Seite 807, Abb. 28: Rating Codes zweier Rating Agenturen  
(Vgl. May, H.: Geldanlage. Vermögensbildung, 2. Aufl., München / Wien 2004, S. 51)

## KAPITEL G: KAPITALWIRTSCHAFT

### 5. VERMÖGENS- UND KAPITALSTRUKTURGESTALTUNG

| Kreditfinanzierung                                  |                                                                                                          |
|-----------------------------------------------------|----------------------------------------------------------------------------------------------------------|
| Kapitalmarktanleihe                                 | Bankkredit                                                                                               |
| Externe Bonitätseinstufung durch eine Ratingagentur | Interne Bonitätseinstufung durch Kreditinstitut oder externe Bonitätseinstufung durch eine Ratingagentur |

Seite 807, Abb. 29: Bonitätseinstufung bei einer Kreditfinanzierung

## KAPITEL G: KAPITALWIRTSCHAFT

### 5. VERMÖGENS- UND KAPITALSTRUKTURGESTALTUNG

| Basel I                                 |              | Basel II                                  |                 |
|-----------------------------------------|--------------|-------------------------------------------|-----------------|
| <b>Kreditvolumen</b>                    | <b>100 €</b> | <b>Kreditvolumen</b>                      | <b>100 €</b>    |
| * standardisierte Risiko-<br>gewichtung | *100 %       | * bonitätsabhängige Risiko-<br>gewichtung | *20 % - 150 %   |
| * Kapitalkoeffizient                    | * 8 %        | * Kapitalkoeffizient                      | *8 %            |
| = Eigenkapitalunterlegung               | = 8 €        | = Eigenkapitalunterlegung                 | = 1,60 € - 12 € |

Seite 808, Abb. 30: Eigenkapitalunterlegung von Banken nach Basel I und Basel II bei Unternehmenskrediten

## **6. DIE KAPITALVERWENDUNG**

6.1 BEDEUTUNG UND BEGRIFF DER INVESTITION

6.2 DIE INVESTITIONSARTEN

6.3 DER INVESTITIONSENTSCHEIDUNGSPROZESS

6.4 DIE INVESTITIONSRECHNUNGEN

6.5 GEWINNSTEUERN ALS EINFLUSSGRÖßE BEI INVESTITIONSRECHNUNGEN

6.6 INVESTITIONSENTSCHEIDUNGEN UNTER UNSICHERHEIT

6.7 VERFAHREN DER UNTERNEHMENSBEWERTUNG

## KAPITEL G: KAPITALWIRTSCHAFT

### 6. DIE KAPITALVERWENDUNG

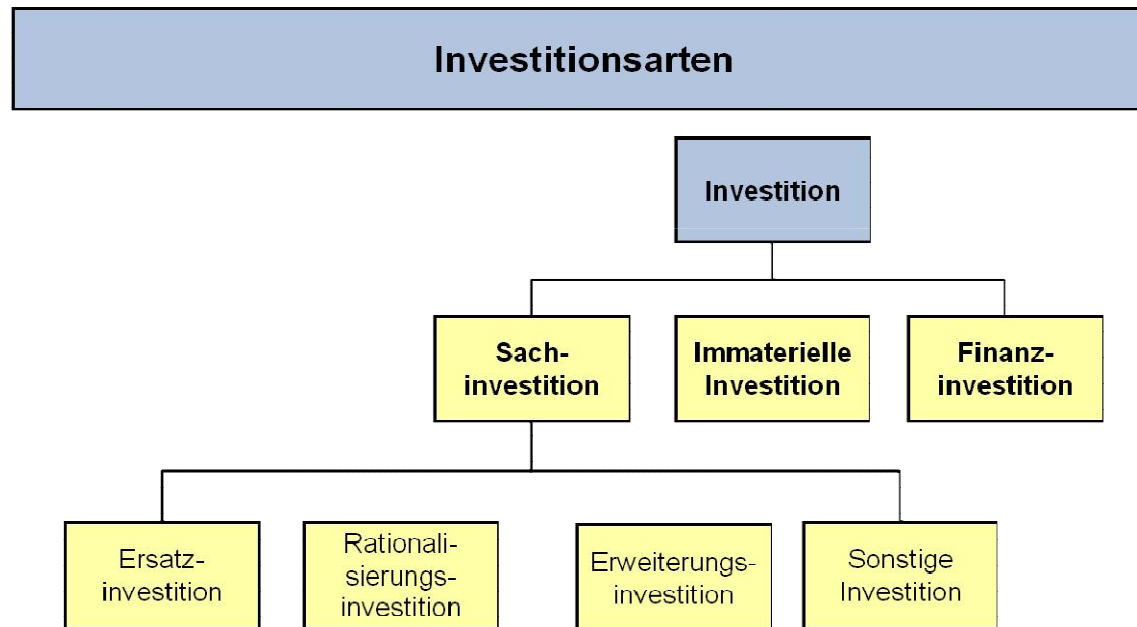

Seite 813, Abb. 31: Investitionsarten

## KAPITEL G: KAPITALWIRTSCHAFT

### 6. DIE KAPITALVERWENDUNG

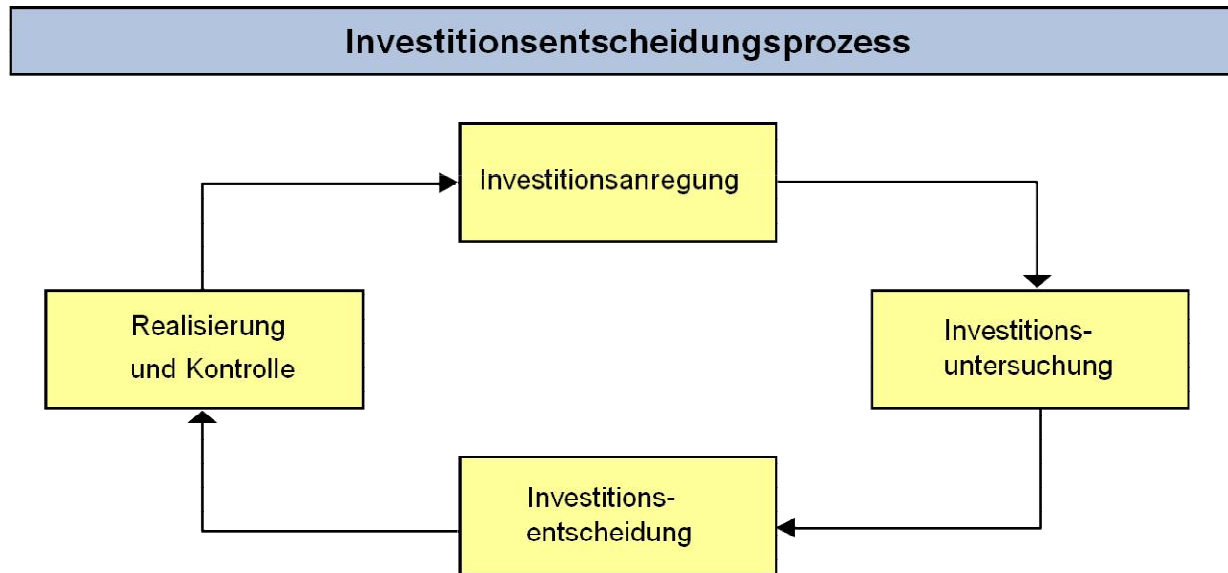

Seite 815, Abb. 32: Investitionsentscheidungsprozess

## KAPITEL G: KAPITALWIRTSCHAFT

### 6. DIE KAPITALVERWENDUNG

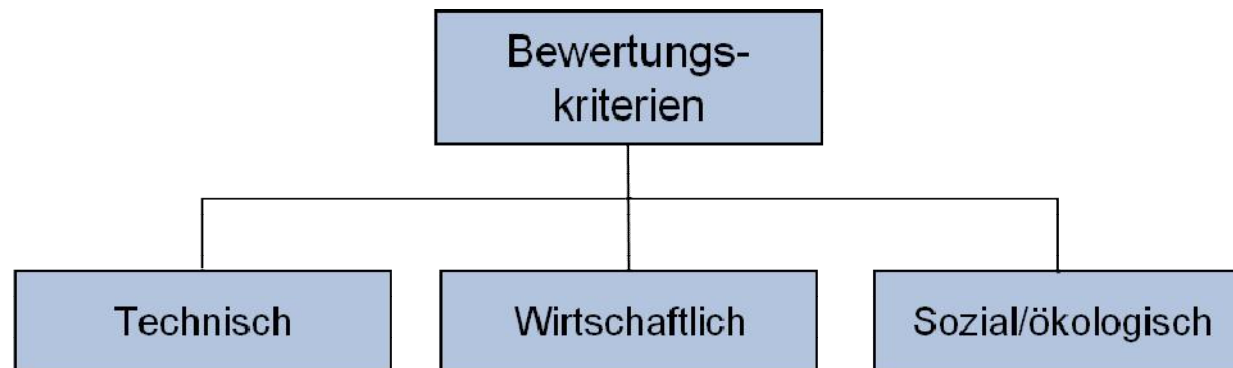

Seite 816, Abb. 33: Bewertungskriterien von Investitionen



## KAPITEL G: KAPITALWIRTSCHAFT

### 6. DIE KAPITALVERWENDUNG

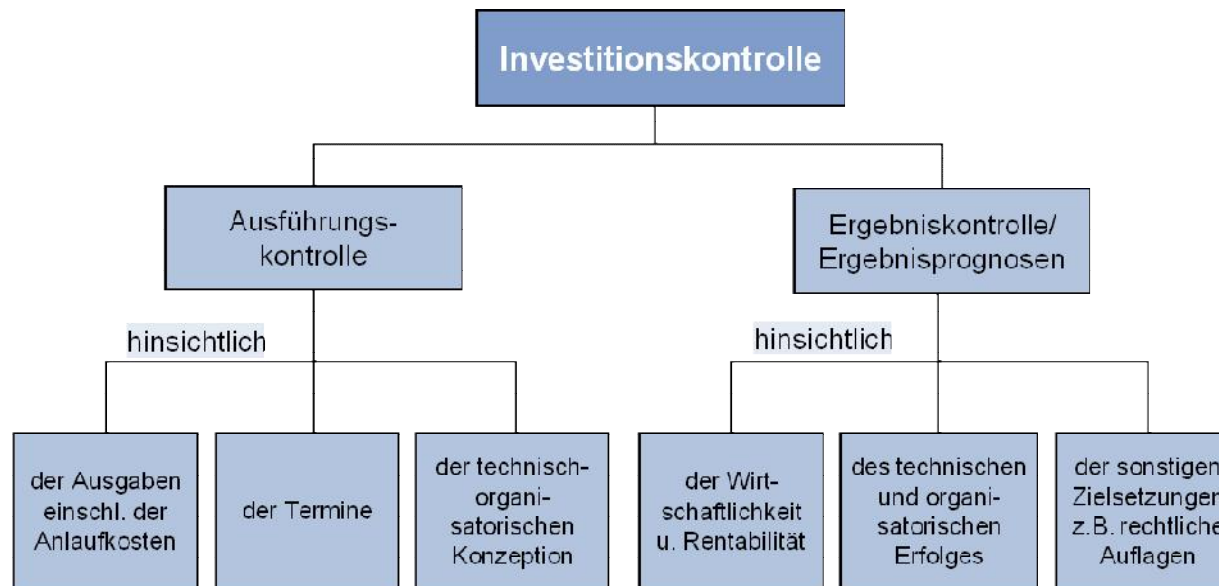

Seite 818, Abb. 34: Investitionskontrolle

## KAPITEL G: KAPITALWIRTSCHAFT

### 6. DIE KAPITALVERWENDUNG

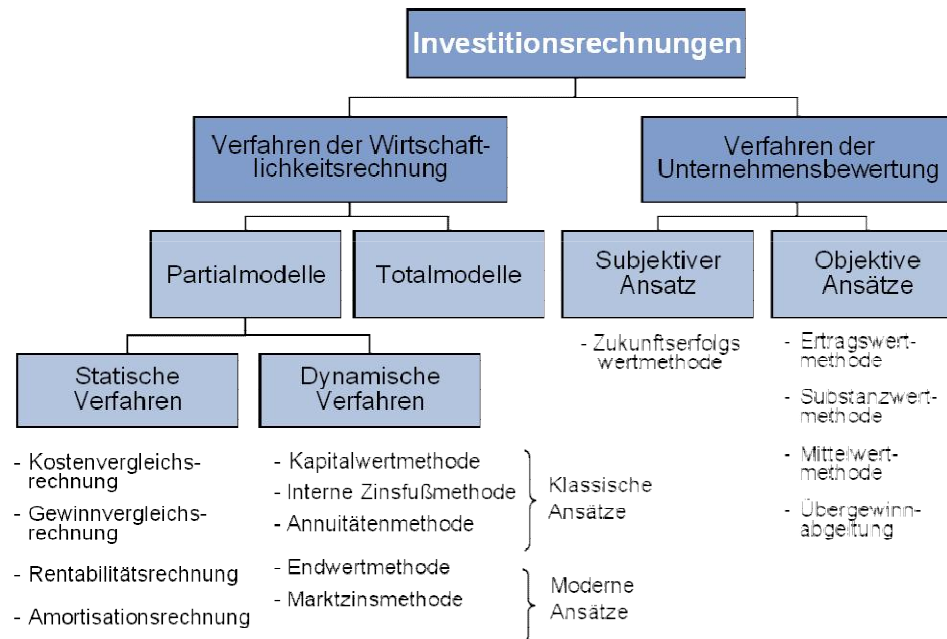

Seite 819, Abb. 35: Die Verfahren der Investitionsrechnung

## KAPITEL G: KAPITALWIRTSCHAFT

### 6. DIE KAPITALVERWENDUNG

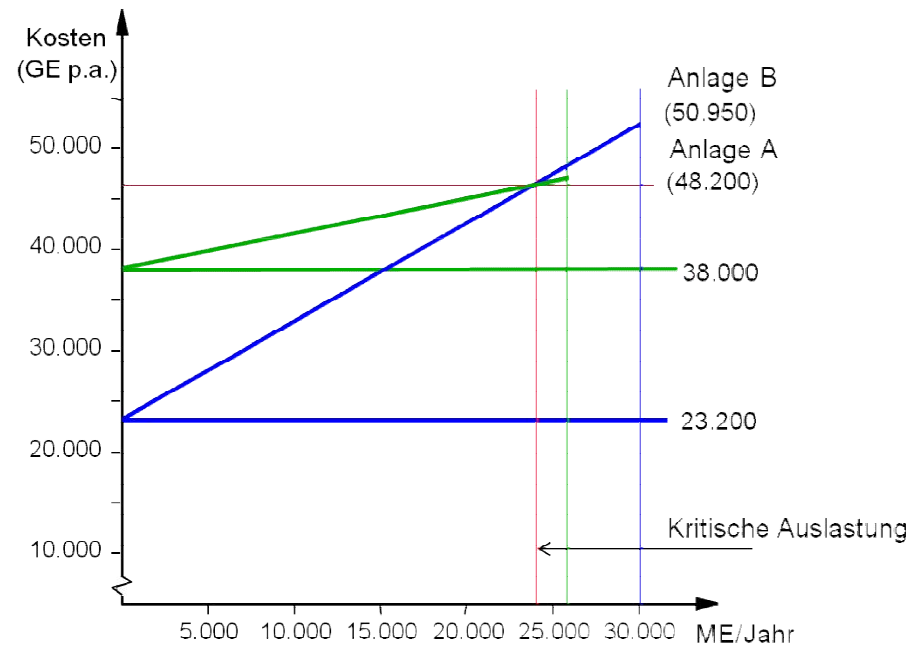

Seite 823, Abb. 36: Grafische Darstellung der kritischen Auslastung

## KAPITEL G: KAPITALWIRTSCHAFT

### 6. DIE KAPITALVERWENDUNG

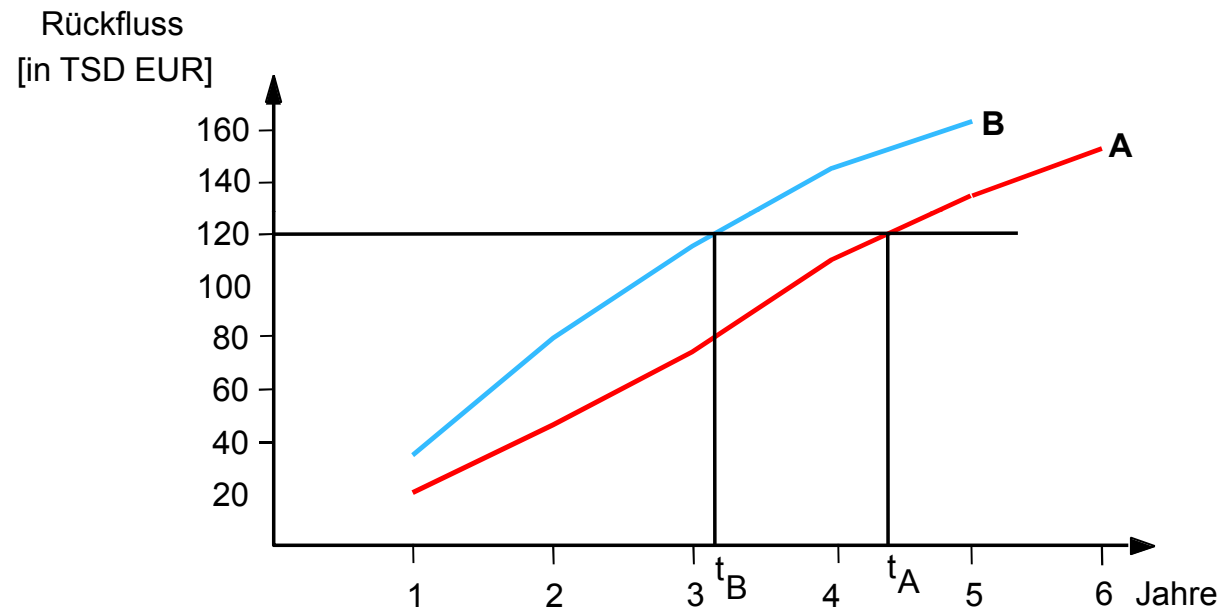

Seite 831, Abb. 37: Grafische Darstellung der kumulierten Rückflüsse

## KAPITEL G: KAPITALWIRTSCHAFT

### 6. DIE KAPITALVERWENDUNG

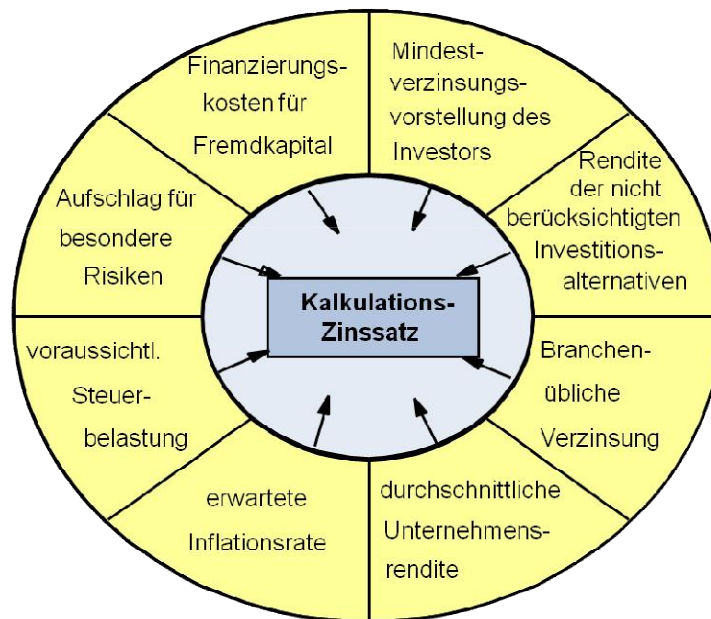

Seite 835, Abb. 38: Determinanten des Kalkulationszinssatzes  
(Vgl. Müller-Hedrich, B.-W./ Schünemann, G./ Zdrowomyslaw, N.: Investitionsmanagement, 10.Aufl.,  
Renningen 2006, S. 130)

## KAPITEL G: KAPITALWIRTSCHAFT

### 6. DIE KAPITALVERWENDUNG

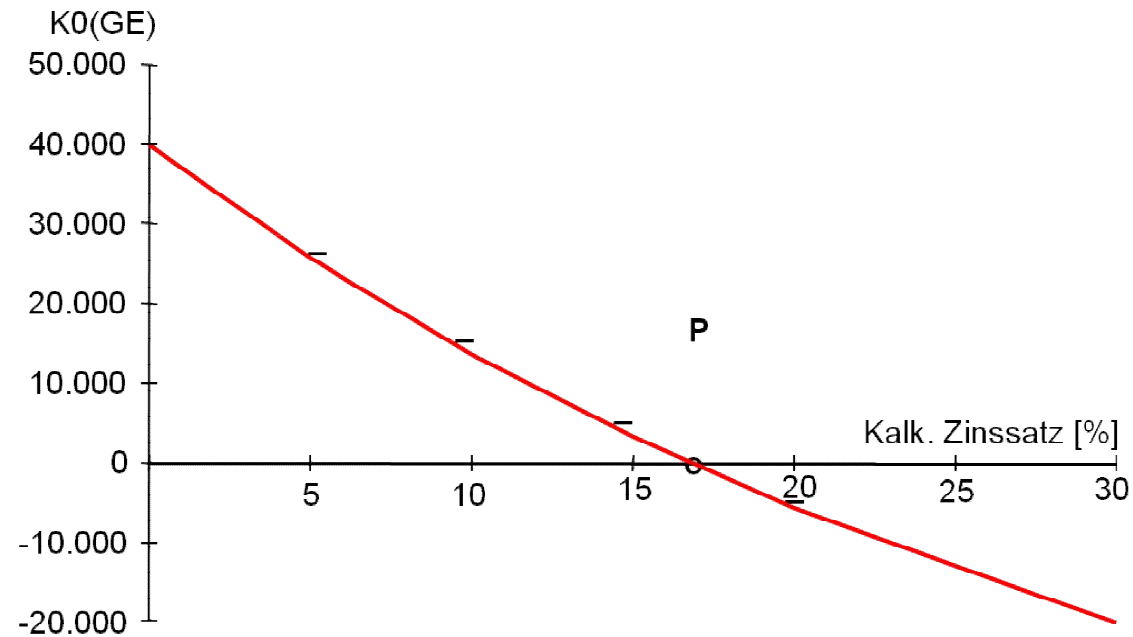

Seite 836, Abb. 39: Zusammenhang von Kapitalwert und Kalkulationszinssatz

## KAPITEL G: KAPITALWIRTSCHAFT

### 6. DIE KAPITALVERWENDUNG

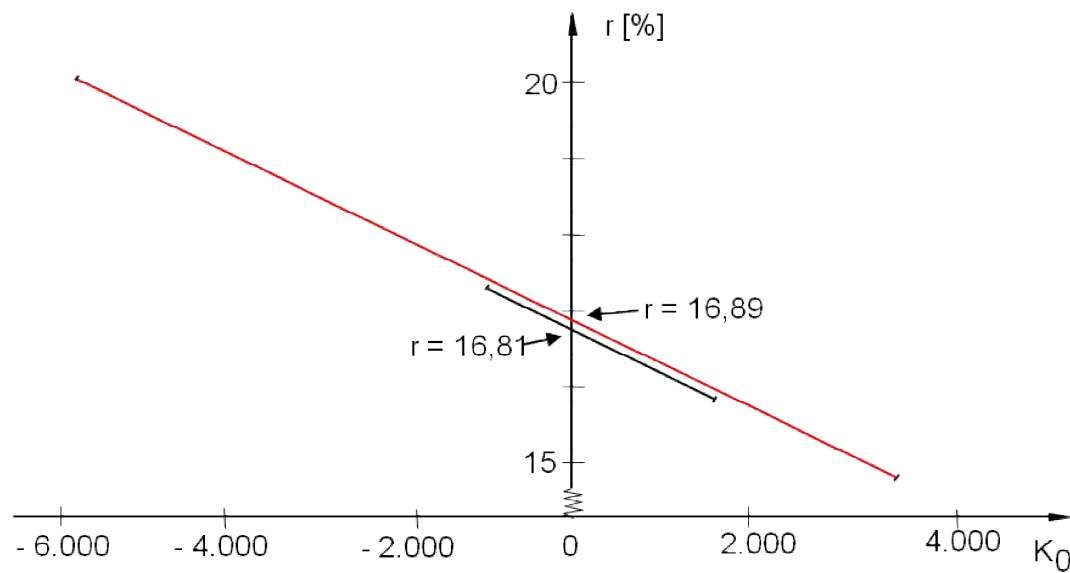

Seite 838, Abb. 40: Grafische Interpolation

## KAPITEL G: KAPITALWIRTSCHAFT

### 6. DIE KAPITALVERWENDUNG

| Zeitpunkt<br>t | Rückflüsse/<br>Kapitaleinsatz | Zinsen<br>bei 16,8 % | Tilgung | Gebundenes Kapital<br>(Vermögenswert) |
|----------------|-------------------------------|----------------------|---------|---------------------------------------|
| 0              | - 100.000                     | -                    | -       | - 100.000                             |
| 1              | + 30.000                      | 16.800               | 13.200  | - 86.800                              |
| 2              | + 50.000                      | 14.582               | 35.418  | - 51.382                              |
| 3              | + 60.000                      | 8.632                | 51.368  | - 14                                  |

Seite 838, Abb. 41: Entwicklung des Vermögenswertes bei Internem Zinsfuß



## KAPITEL G: KAPITALWIRTSCHAFT

### 6. DIE KAPITALVERWENDUNG

Kalkulationszinssatz 10%

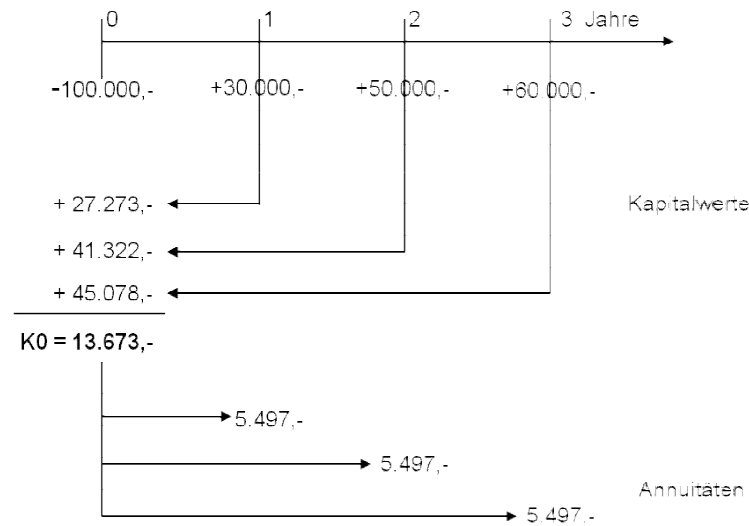

$$A = K_0 \cdot WGF_3^{0,1} = 13.673, \cdot 0,402 = 5.497,$$

Seite 839, Abb. 42: Umwandlung von Kapitalwerten in Annuitäten

## KAPITEL G: KAPITALWIRTSCHAFT

### 6. DIE KAPITALVERWENDUNG

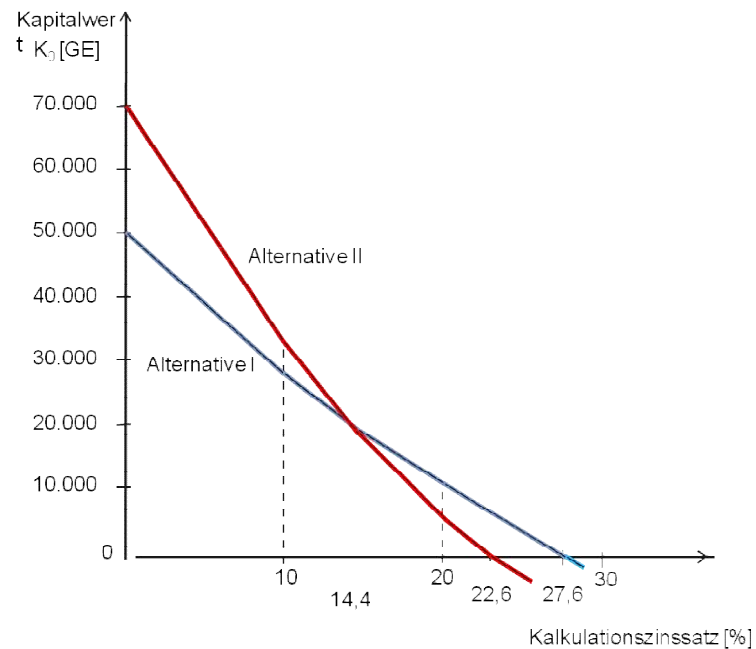

Seite 845, Abb. 43: Alternativenvergleich mit sich schneidenden Kapitalwertkurven

## KAPITEL G: KAPITALWIRTSCHAFT

### 6. DIE KAPITALVERWENDUNG

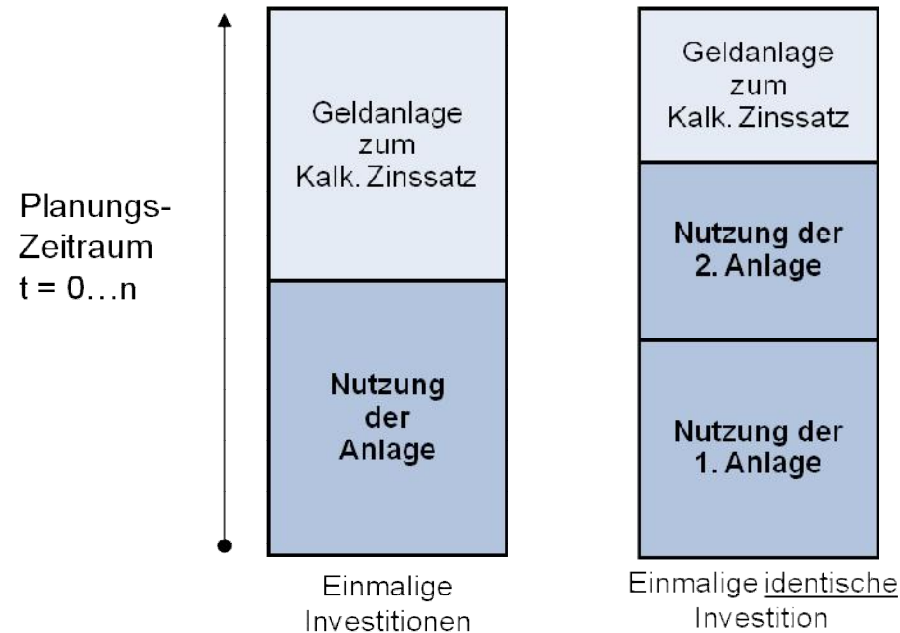

Seite 848, Abb. 44: Wirtschaftliche (optimale) Nutzungsdauer bei einmaliger Investition bzw. einmaliger identischer Investition

## KAPITEL G: KAPITALWIRTSCHAFT

### 6. DIE KAPITALVERWENDUNG

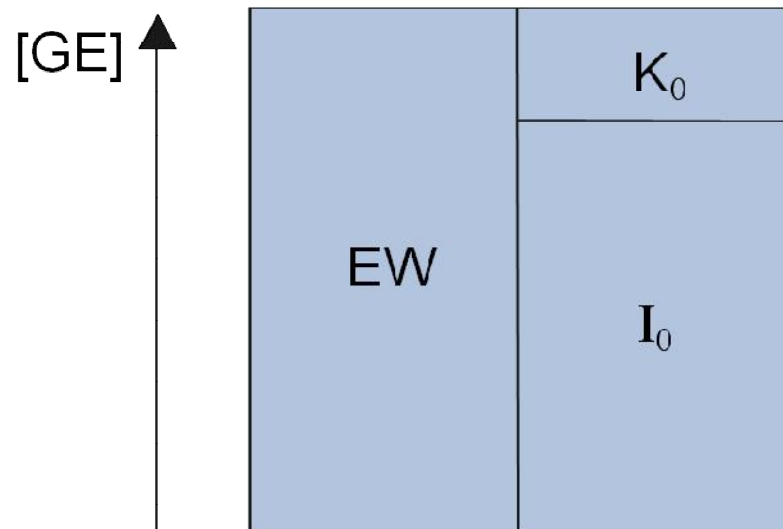

Seite 848, Abb. 45: Ertragswert, Kapitalwert, Anschaffungsausgabe

## KAPITEL G: KAPITALWIRTSCHAFT

### 6. DIE KAPITALVERWENDUNG

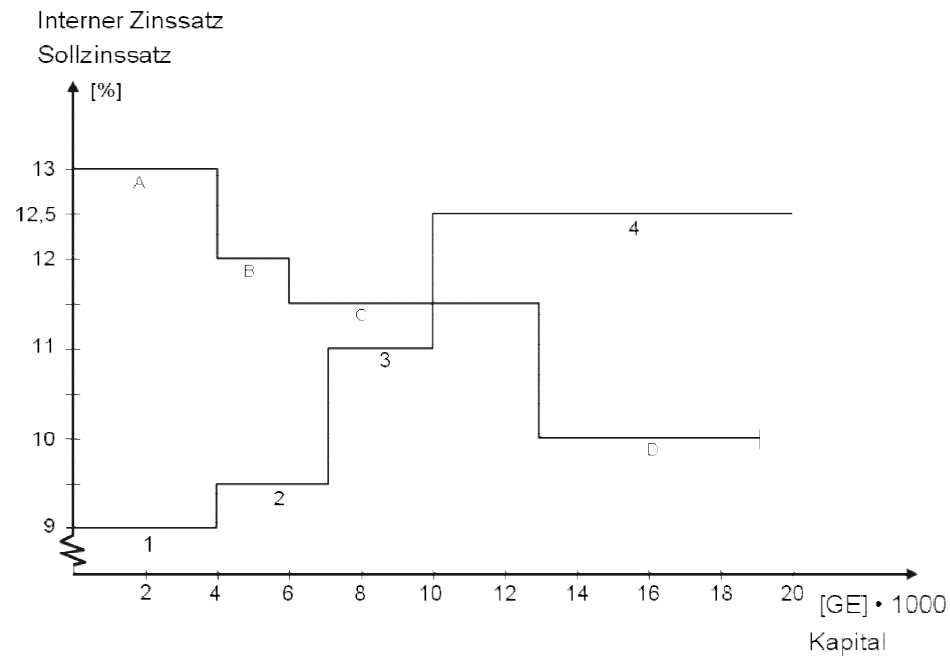

Seite 852, Abb. 46: Simultane Investitions- und Finanzplanung

## KAPITEL G: KAPITALWIRTSCHAFT

### 6. DIE KAPITALVERWENDUNG

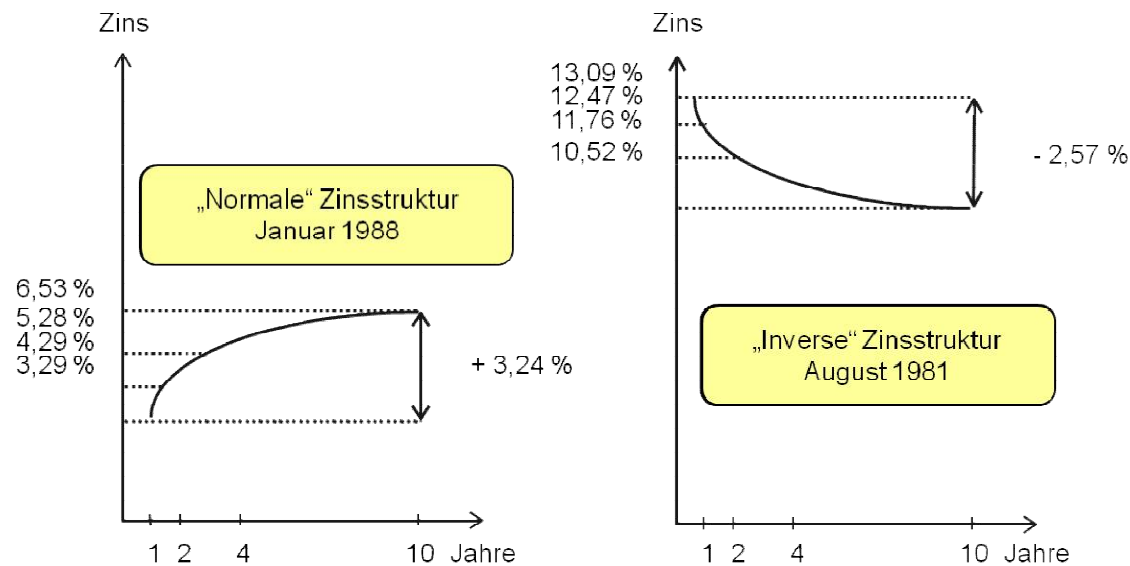

Seite 857, Abb. 47: Zinsstruktur in Hoch- und Niedrigzinsphase

## KAPITEL G: KAPITALWIRTSCHAFT

### 6. DIE KAPITALVERWENDUNG

| Methode                                                                                                                                                                                                                                                                         | Zahlungsreihe | Kalkulationszinsfuß      |
|---------------------------------------------------------------------------------------------------------------------------------------------------------------------------------------------------------------------------------------------------------------------------------|---------------|--------------------------|
| Zinsmodell                                                                                                                                                                                                                                                                      |               | $i$                      |
| Standardmodell                                                                                                                                                                                                                                                                  |               | $i_{\text{ns}} = i(1-s)$ |
| Nettomethode                                                                                                                                                                                                                                                                    |               | $i_{\text{ns}} = i(1-s)$ |
| $i$ = Kalkulationszinsfuß vor Steuern (unkorrigiert)<br>$i_{\text{ns}}$ = Kalkulationszinsfuß nach Steuern<br>$s$ = Steuersatz<br>$R_t$ = Rückfluss vor Steuern (unkorrigiert)<br>$AfA_t$ = Abschreibung vor Steuern<br>$Z_t$ = Zinsaufwand / -ertrag<br>$KD_t$ = Kapitaldienst |               |                          |

Seite 864, Abb. 48: Die Berücksichtigung von steuerlichen Effekten

## KAPITEL G: KAPITALWIRTSCHAFT

### 6. DIE KAPITALVERWENDUNG

| Risikosituation |            | Kalkulationszinsfuß |
|-----------------|------------|---------------------|
| Markt           | Produkt(e) |                     |
| vorhanden       | bekannt    | 10 %                |
| vorhanden       | neu        | 15 %                |
| neu             | bekannt    | 25 %                |
| neu             | neu        | 30 %                |

Seite 866, Abb. 49: Kalkulationszinsfuß bei verschiedenen Risikosituationen



## KAPITEL G: KAPITALWIRTSCHAFT

### 6. DIE KAPITALVERWENDUNG

| Input-Größe        | Geschätzter Wert  | Kritischer Wert     | Relative Änderung |
|--------------------|-------------------|---------------------|-------------------|
| Kalkulationszins   | 10 %              | 13,78 %             | (+) 37,8 %        |
| Nutzungsdauer      | 10 Jahre          | 7,85 Jahre          | (-) 21,5 %        |
| Absatzmenge        | 2.000 ME          | 1.800 ME            | (-) 10,0 %        |
| Anschaffungskosten | 1.000.000 EUR     | 1.167.550 EUR       | (+) 16,8 %        |
| <b>Stückkosten</b> | <b>220 EUR/ME</b> | <b>206,4 EUR/ME</b> | <b>(-) 6,6 %</b>  |

Seite 868, Abb. 50: Die relative Änderung der Inputgrößen für  $K_0 = 0$

## KAPITEL G: KAPITALWIRTSCHAFT

### 6. DIE KAPITALVERWENDUNG

$$\mu = \sum_{i=1}^n w_i z_i \rightarrow \text{Max.}$$

= Erwartungswert

$w_i$  = Wahrscheinlichkeit eines Wertes der Zielgröße

$z_i$  = Werte einer Zielgröße ( $i = 1, 2, \dots, n$ )

Seite 869, Abb. 51: Bayes-Regel

## KAPITEL G: KAPITALWIRTSCHAFT

### 6. DIE KAPITALVERWENDUNG

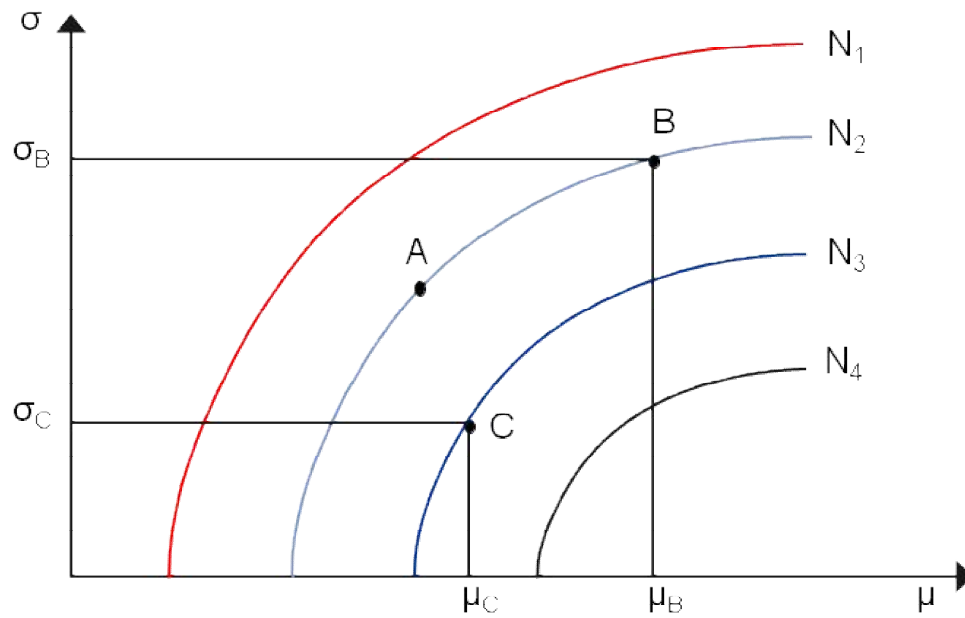

Seite 870, Abb. 52: Risikopräferenzfunktion bei Risikoaversion

## KAPITEL G: KAPITALWIRTSCHAFT

### 6. DIE KAPITALVERWENDUNG

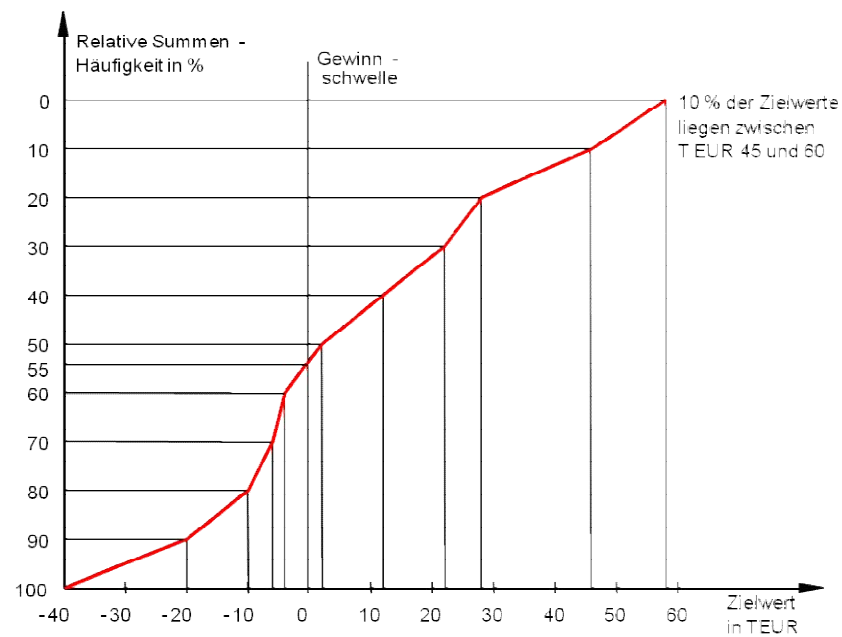

Seite 872, Abb. 53: Risikoprofil einer Investition
