# Supplementary material
Source: publisher site journal article supplement (https://www.degruyterbrill.com/publication/isbn/9783486989434/downloadAsset/9783486989434_Folien--de.zip)
Supplement: Supplementary file 8 [file Teil_H_ABWL.pdf › Teil_H_ABWL.pdf]

## KAPITEL H: PERSONALWIRTSCHAFT

1. GRUNDLAGEN
2. PERSONELLE LEISTUNGSBEREITSTELLUNG
3. DAS PERSONAL ALS TRÄGER VON BEDÜRFNISSEN UND WERTEN
4. INFORMATIONSSYSTEME DER PERSONALWIRTSCHAFT
5. ZUKUNFTSPERSPEKTIVEN DES PERSONALMANAGEMENTS

# 1. GRUNDLAGEN

1.1 BEGRIFFE

1.2 OBJEKTE UND TRÄGER

1.3 ZIELE

1.4 AUFGABEN

1.5 ORGANISATION

1.6 MITBESTIMMUNG

## KAPITEL H: PERSONALWIRTSCHAFT

### 1. GRUNDLAGEN

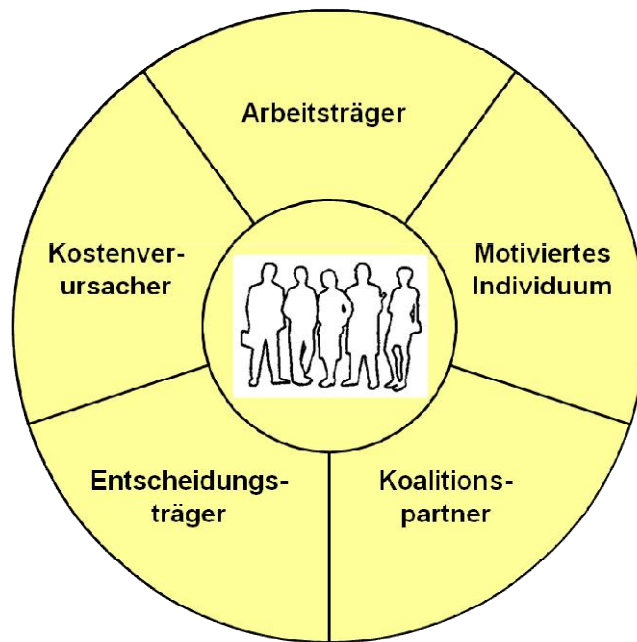

Seite 884, Abb. 1: Eigenschaften des Personals

# KAPITEL H: PERSONALWIRTSCHAFT

## 1. GRUNDLAGEN

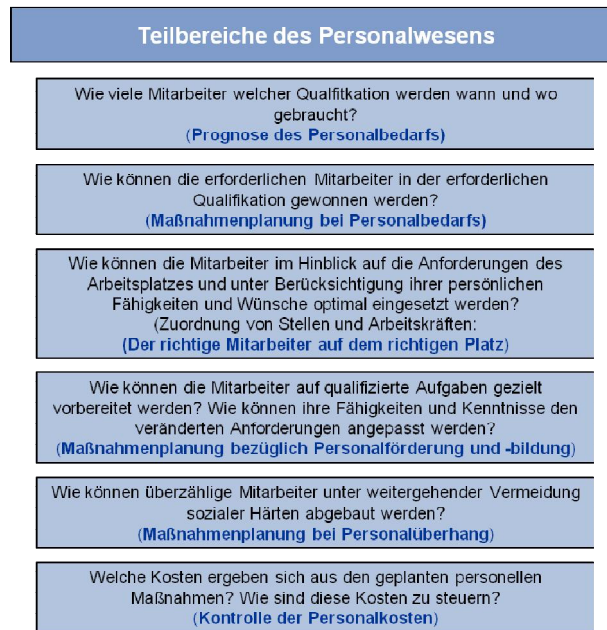

Seite 885, Abb. 2: Teilbereiche des Personalwesens

## KAPITEL H: PERSONALWIRTSCHAFT

### 1. GRUNDLAGEN

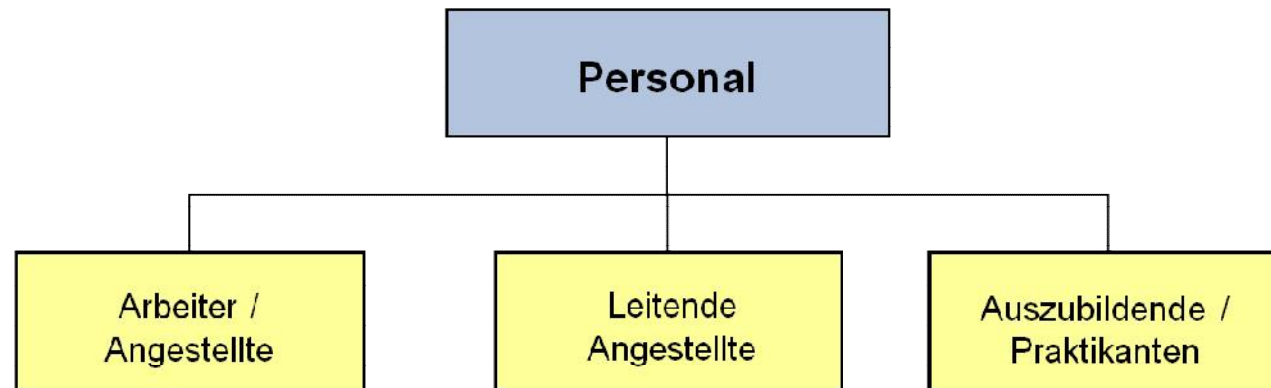

Seite 886, Abb. 3: Objekte der Personalwirtschaft

## KAPITEL H: PERSONALWIRTSCHAFT

### 1. GRUNDLAGEN

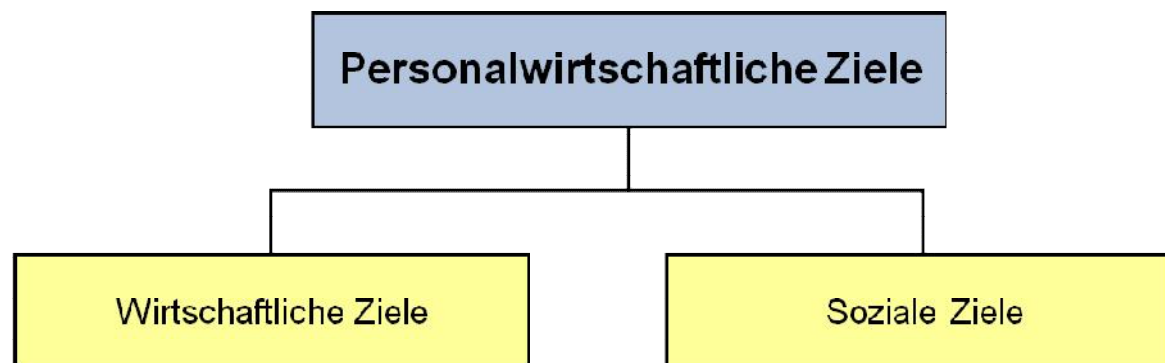

Seite 888, Abb. 4: Personalwirtschaftliche Ziele

## KAPITEL H: PERSONALWIRTSCHAFT

### 1. GRUNDLAGEN

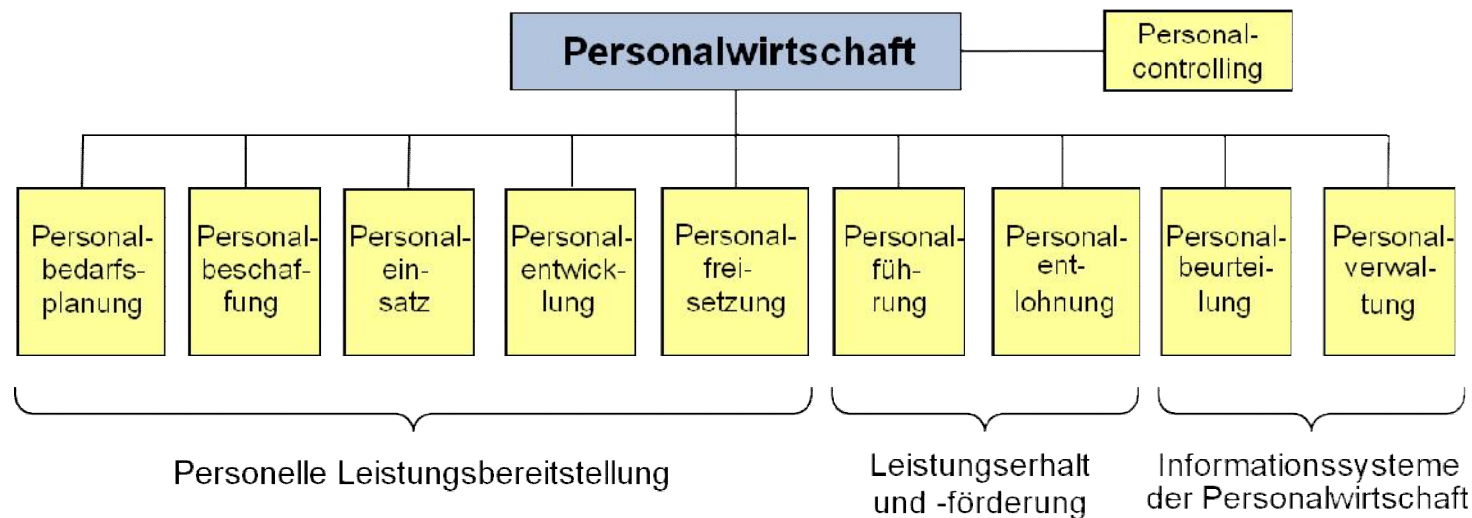

Seite 889, Abb. 5: Hauptaufgaben der Personalwirtschaft  
(Vgl. Jung, H.: Personalwirtschaft, 10. Aufl., Berlin / Boston 2016, S. 4)



## KAPITEL H: PERSONALWIRTSCHAFT

### 1. GRUNDLAGEN

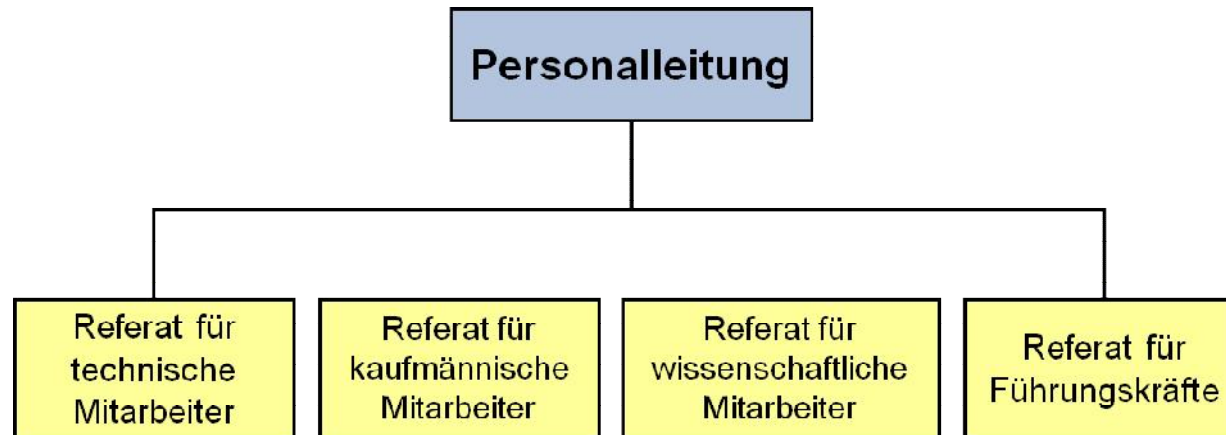

Seite 891, Abb. 6: Organisation des Personalwesens nach beruflichen Tätigkeitsbereichen

## KAPITEL H: PERSONALWIRTSCHAFT

### 1. GRUNDLAGEN

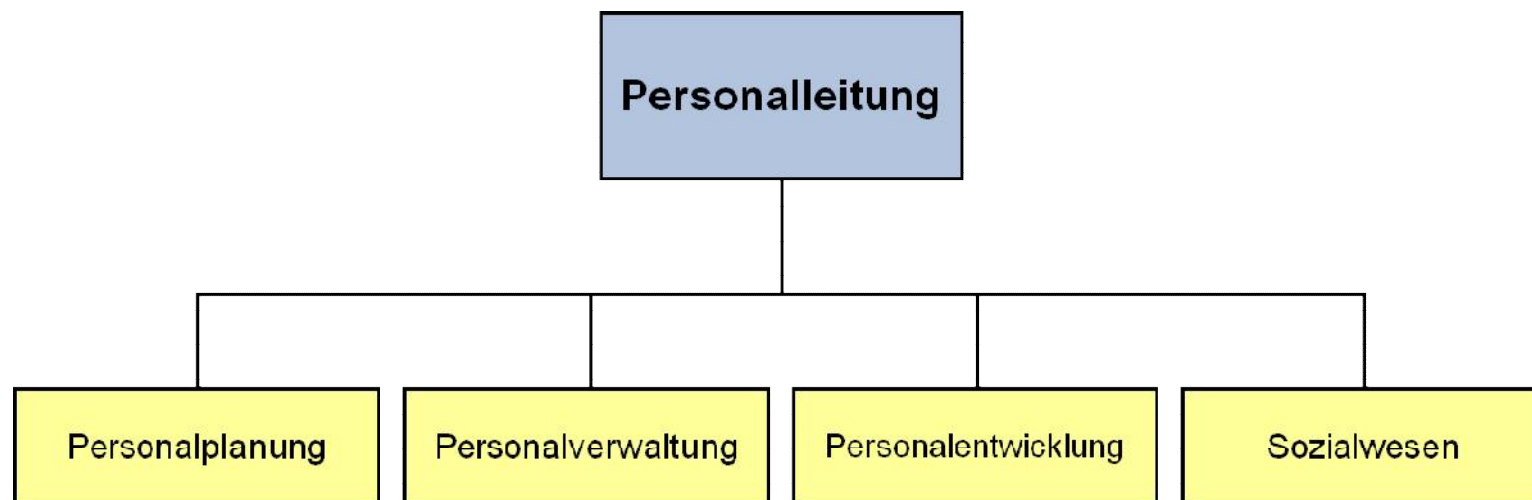

Seite 892, Abb. 7: Funktionsbezogene Organisation

## KAPITEL H: PERSONALWIRTSCHAFT

### 1. GRUNDLAGEN

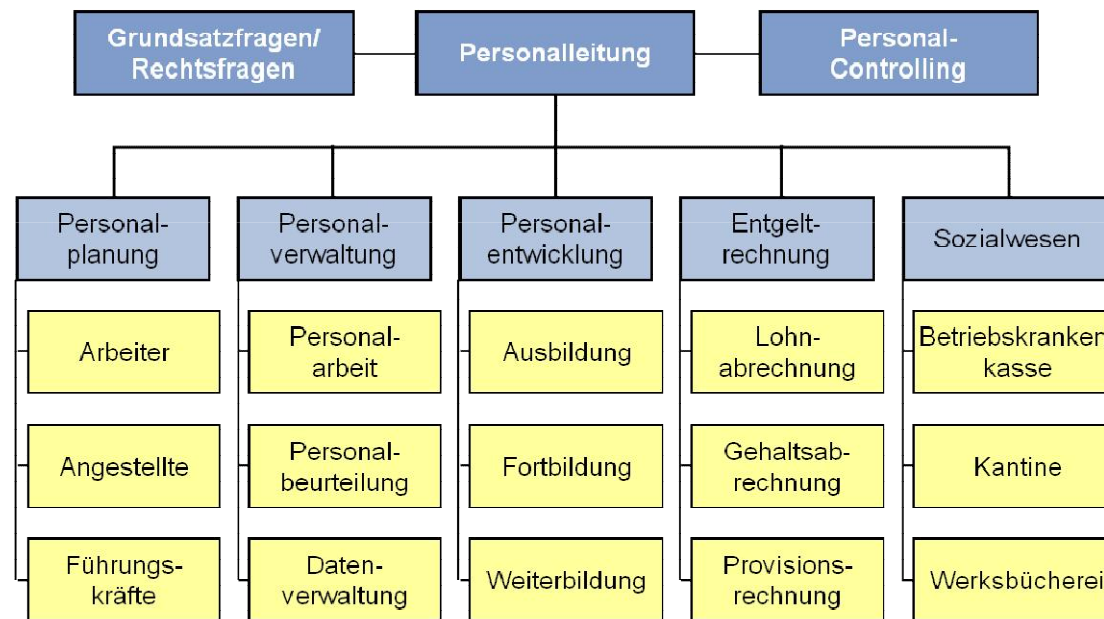

Seite 892, Abb. 8: Gemischte Organisation

## KAPITEL H: PERSONALWIRTSCHAFT

### 1. GRUNDLAGEN

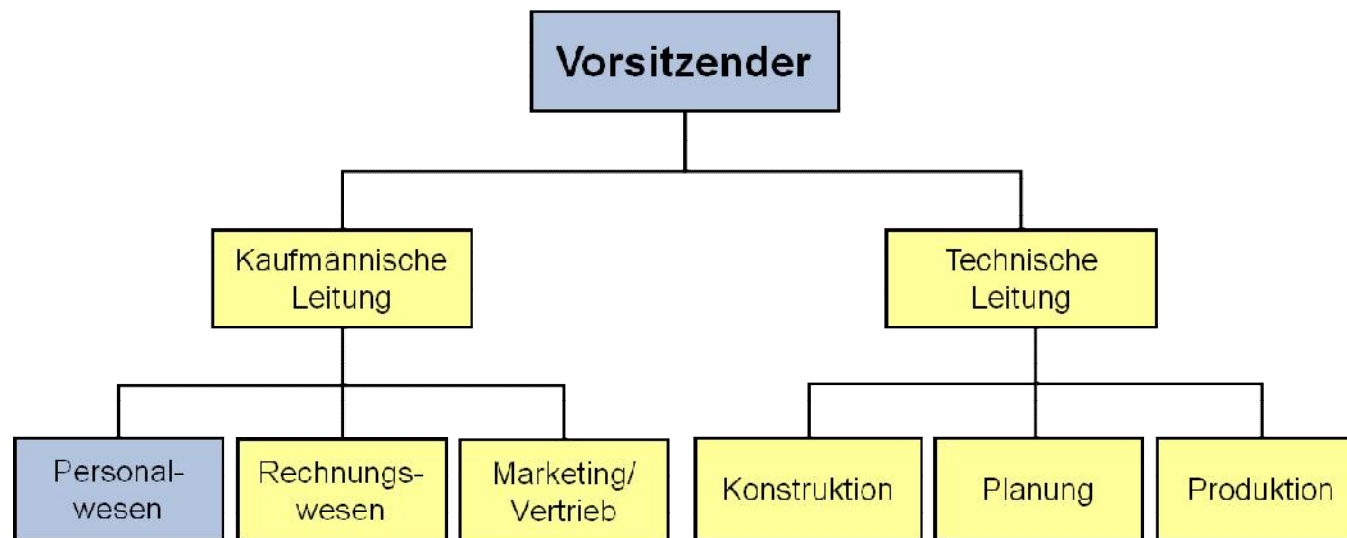

Seite 893, Abb. 9: Eingliederung des Personalwesens unter die kaufmännische Leitung

## KAPITEL H: PERSONALWIRTSCHAFT

### 1. GRUNDLAGEN

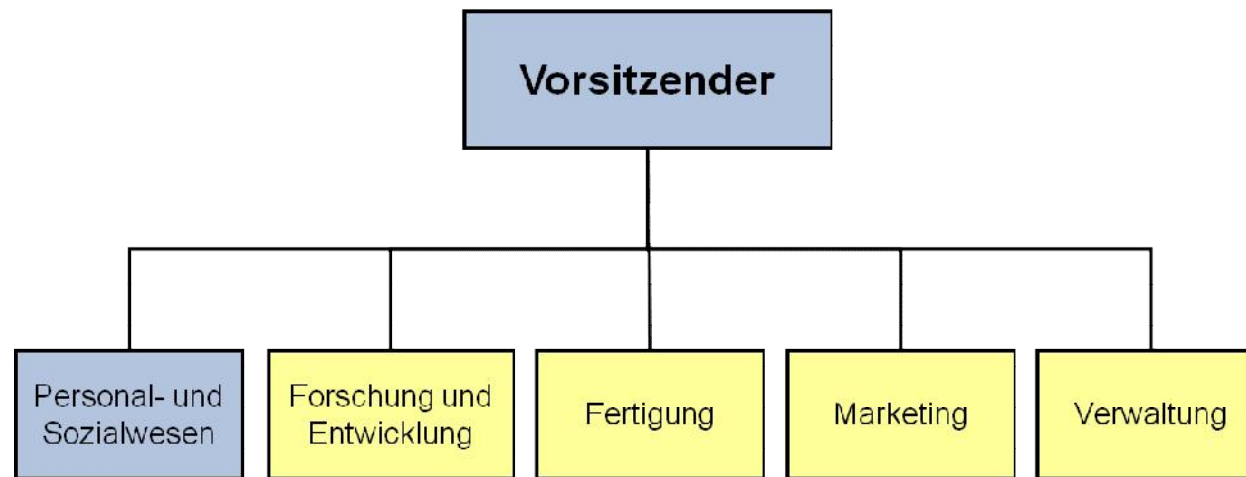

Seite 894, Abb. 10: Eingliederung des Personalwesens in die Unternehmensleitung

## KAPITEL H: PERSONALWIRTSCHAFT

### 1. GRUNDLAGEN

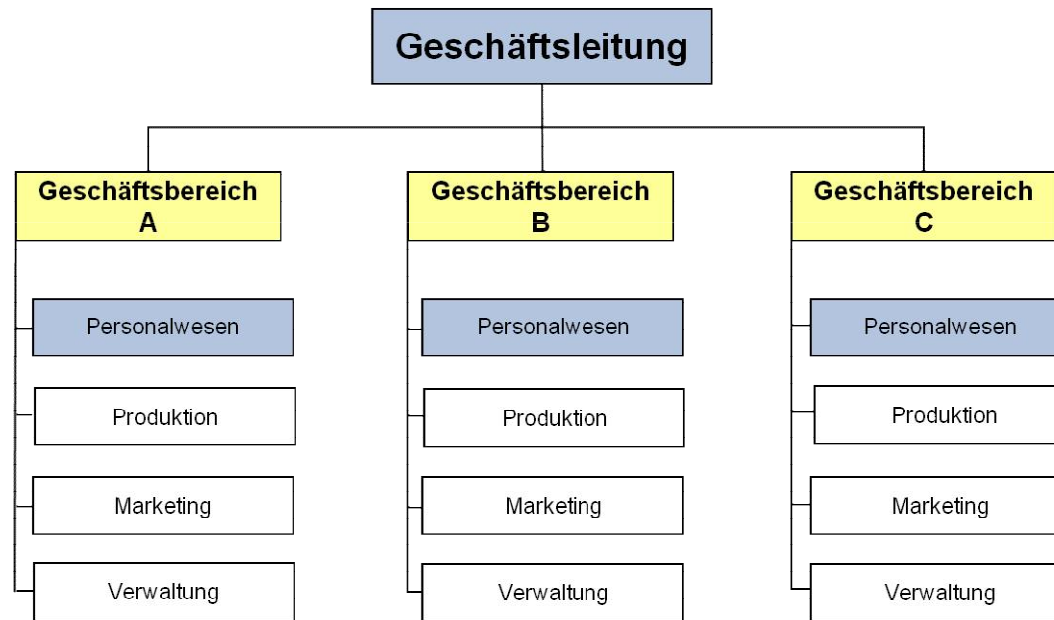

Seite 894, Abb. 11: Eingliederung des Personalwesens bei einer Spartenorganisation

## KAPITEL H: PERSONALWIRTSCHAFT

### 1. GRUNDLAGEN

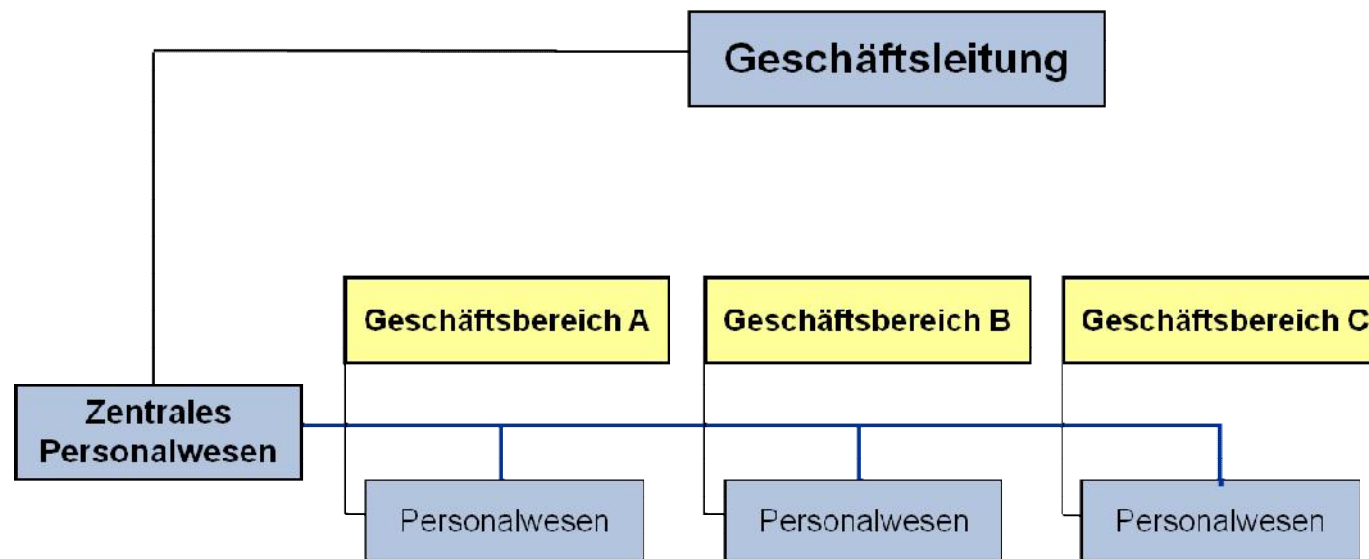

Seite 895, Abb. 12: Das Personalwesen bei einer Matrixorganisation

## KAPITEL H: PERSONALWIRTSCHAFT

### 1. GRUNDLAGEN

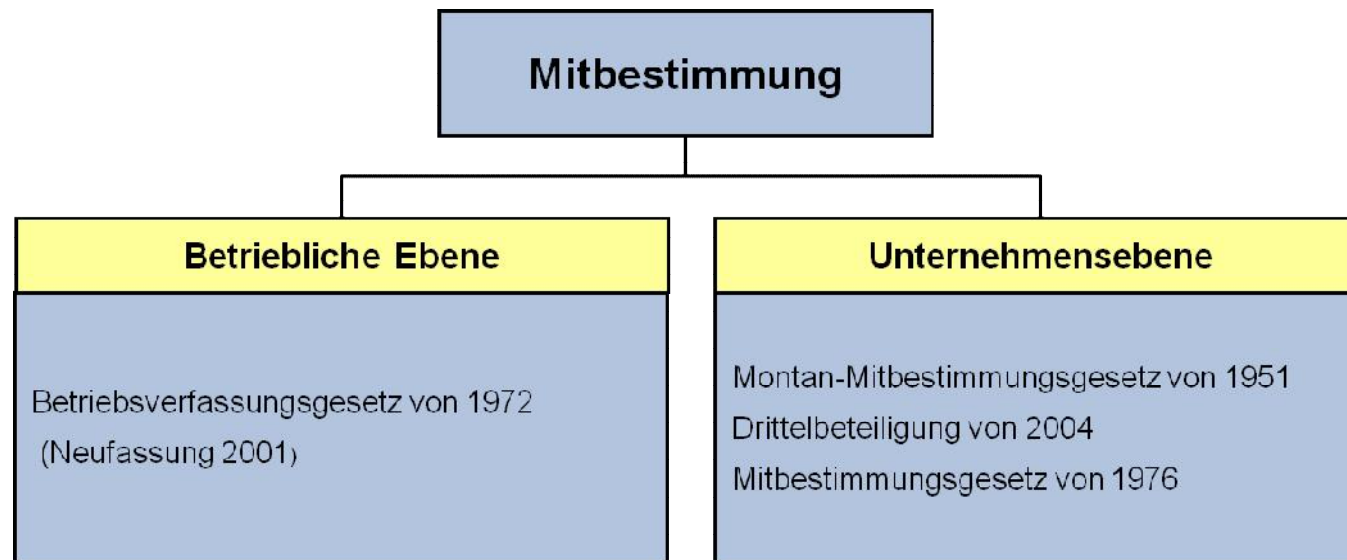

Seite 895, Abb. 13: Ebenen und Gesetze der Mitbestimmung



## **2. PERSONELLE LEISTUNGSBEREITSTELLUNG**

2.1 PERSONALBEDARFSPLANUNG

2.2 PERSONALBESCHAFFUNG

2.3 PERSONALENTWICKLUNG

2.4 PERSONALFREISETZUNG

2.5 PERSONALEINSATZ

## KAPITEL H: PERSONALWIRTSCHAFT

### 2. PERSONELLE LEISTUNGSBEREITSTELLUNG

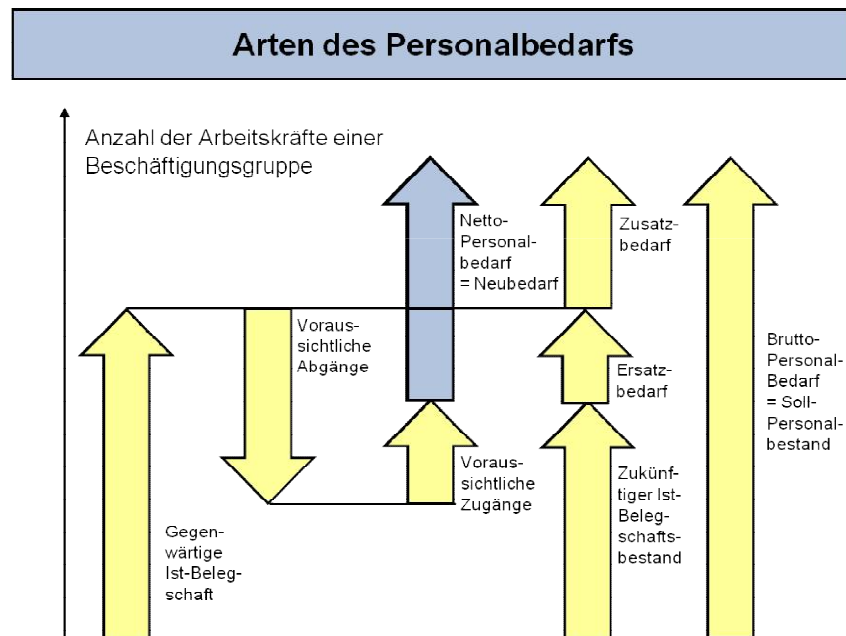

Seite 897, Abb. 14: Arten des Personalbedarfs  
(Vgl. Jung, H.: Personalwirtschaft, 10. Aufl., Berlin / Boston 2016, S.118f)

## KAPITEL H: PERSONALWIRTSCHAFT

### 2. PERSONELLE LEISTUNGSBEREITSTELLUNG

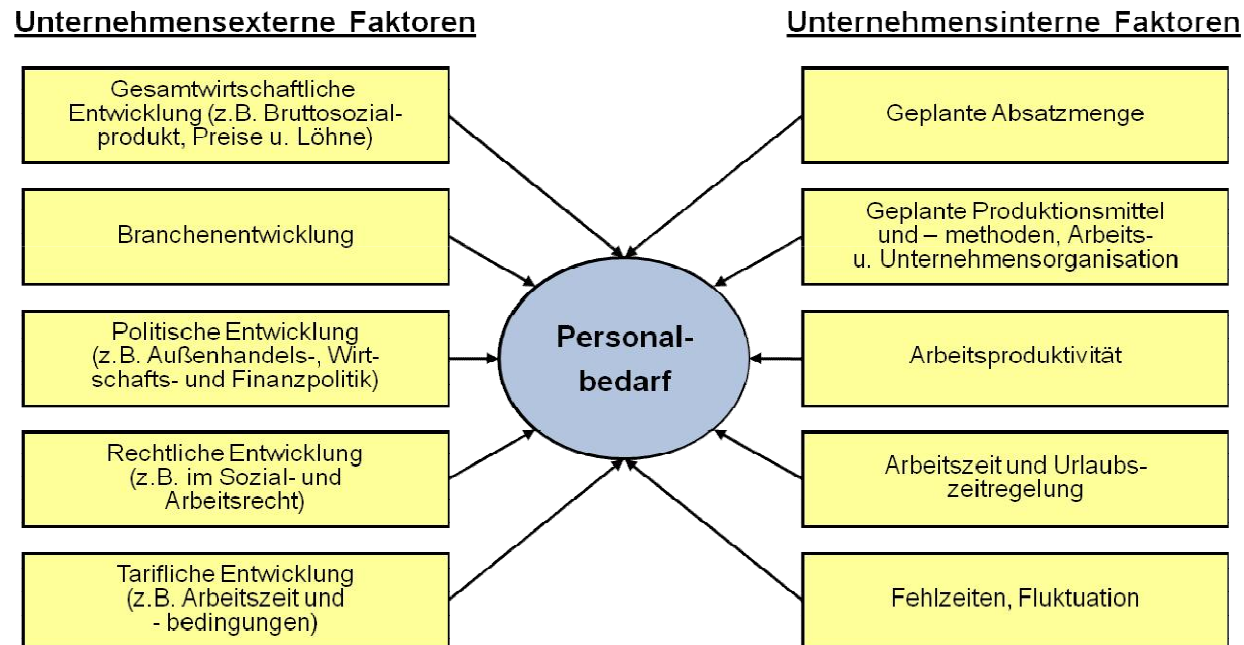

Seite 898, Abb. 15: Einflussfaktoren auf den Personalbedarf

## KAPITEL H: PERSONALWIRTSCHAFT

### 2. PERSONELLE LEISTUNGSBEREITSTELLUNG

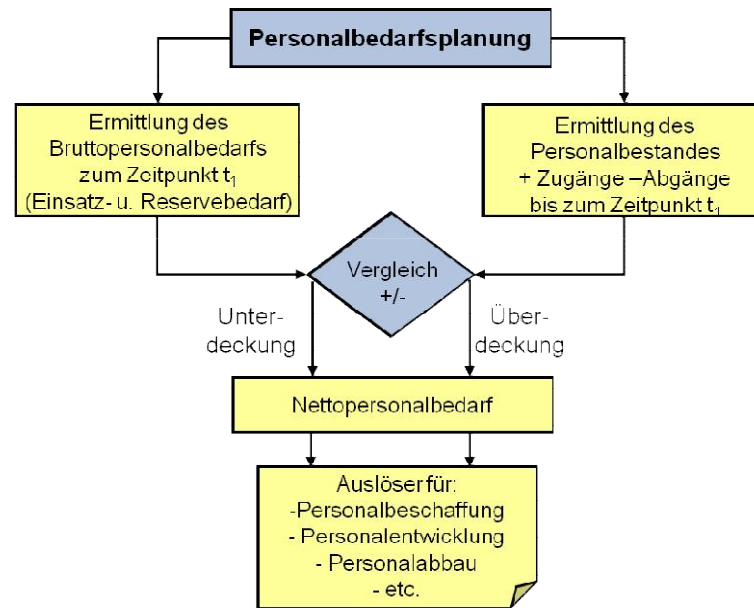

Planungszeitraum =  $t_0$  bis  $t_1$

Seite 898, Abb. 16: Ablauf der Personalbedarfsplanung  
(Vgl. Berthel, J./Becker, F. G.: Personal-Management: Grundzüge für Konzeptionen betrieblicher  
Personalarbeit, 7. Aufl., Stuttgart 2003, S. 94)

Jung: Allgemeine Betriebswirtschaftslehre. De Gruyter Oldenbourg 2016. ISBN 978-3-486-76376-8

## KAPITEL H: PERSONALWIRTSCHAFT

### 2. PERSONELLE LEISTUNGSBEREITSTELLUNG

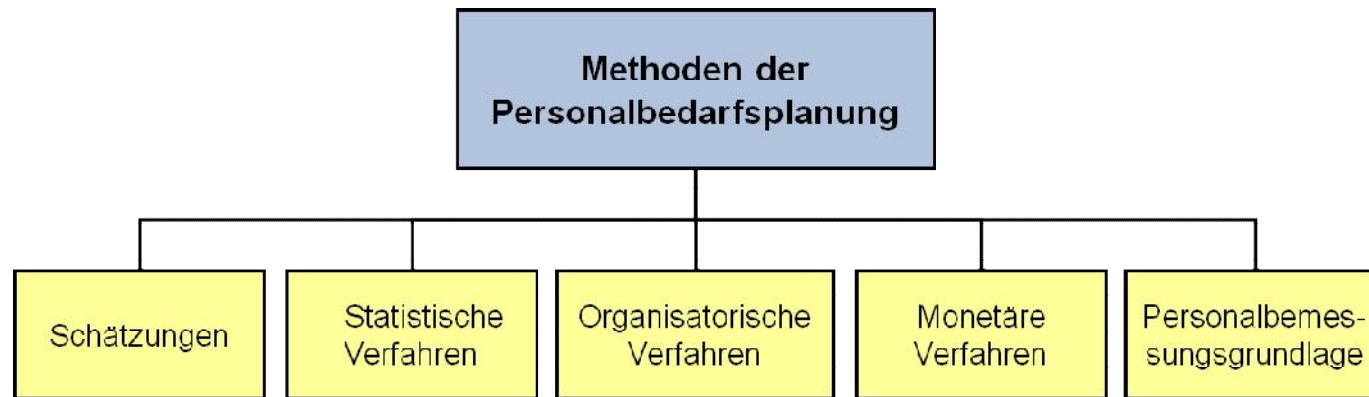

Seite 900, Abb. 17: Methoden der Bedarfsplanung

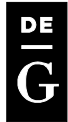

DE GRUYTER  
OLDENBOURG

## KAPITEL H: PERSONALWIRTSCHAFT

### 2. PERSONELLE LEISTUNGSBEREITSTELLUNG

| Personalbestands-<br>rechnung                           | Abteilung .....    |   |                    |   |                    |   |
|---------------------------------------------------------|--------------------|---|--------------------|---|--------------------|---|
|                                                         | Gruppe .....       |   |                    |   |                    |   |
|                                                         | Zeitraum<br>Jahr 1 |   | Zeitraum<br>Jahr 2 |   | Zeitraum<br>Jahr 3 |   |
|                                                         | gesamt             | % | gesamt             | % | gesamt             | % |
| <b>1 Bestand am Anfang der Periode</b>                  |                    |   |                    |   |                    |   |
| <b>- Abgänge</b>                                        |                    |   |                    |   |                    |   |
| 2 Pensionierung                                         |                    |   |                    |   |                    |   |
| 3 Einberufung Bundeswehr/ Zivildienst                   |                    |   |                    |   |                    |   |
| 4 Beförderung innerhalb der Abteilung                   |                    |   |                    |   |                    |   |
| 5 Versetzung in andere Abteilung                        |                    |   |                    |   |                    |   |
| 6 Ausbildung                                            |                    |   |                    |   |                    |   |
| 7 Entlassung                                            |                    |   |                    |   |                    |   |
| 8 Tod                                                   |                    |   |                    |   |                    |   |
| 9 Kündigung durch Arbeitnehmer                          |                    |   |                    |   |                    |   |
| 10 Sonstige                                             |                    |   |                    |   |                    |   |
| 11 Summe der Abgänge (2 bis 10)                         |                    |   |                    |   |                    |   |
| <b>12 Bestand nach Abgängen (1 - 11)</b>                |                    |   |                    |   |                    |   |
| <b>+ geplante (feststehende) Zugänge</b>                |                    |   |                    |   |                    |   |
| 13 Rückkehr Ausbildung                                  |                    |   |                    |   |                    |   |
| 14 Beförderung innerhalb der Abteilung                  |                    |   |                    |   |                    |   |
| 15 Versetzung in der Abteilung                          |                    |   |                    |   |                    |   |
| 16 Rückkehr Bundeswehr/ Zivildienst                     |                    |   |                    |   |                    |   |
| 17 Übernahme aus dem Ausbildungsverhältnis              |                    |   |                    |   |                    |   |
| 18 Sonstige                                             |                    |   |                    |   |                    |   |
| 19 Summe der Zugänge (13 bis 18)                        |                    |   |                    |   |                    |   |
| <b>20 Personalbestand am Ende der Periode (12 + 19)</b> |                    |   |                    |   |                    |   |

Seite 904, Abb. 18: Abgangs-Zugangs-Tabelle  
(Vgl. Jung, H.: Personalwirtschaft, 10. Aufl., Berlin / Boston 2016, S. 131)

## KAPITEL H: PERSONALWIRTSCHAFT

### 2. PERSONELLE LEISTUNGSBEREITSTELLUNG

| Personal-<br>beschaffung       | Kurzfristiger<br>Personalbedarf                                                         | Langfristiger<br>Personalbedarf |                          |
|--------------------------------|-----------------------------------------------------------------------------------------|---------------------------------|--------------------------|
| Interne<br>Personalbeschaffung | Mehrarbeit<br>Urlaubsverschiebung<br>Vorübergehende Steigerung<br>der Arbeitsintensität | Versetzen                       |                          |
|                                |                                                                                         | Bedarfsdeckend                  | Bedarfs-<br>verschiebend |
| Externe<br>Personalbeschaffung | Personalleasing                                                                         | Neueinstellung                  |                          |



Seite 906, Abb. 19: Interne und externe Personalbeschaffungsarten

## KAPITEL H: PERSONALWIRTSCHAFT

### 2. PERSONELLE LEISTUNGSBEREITSTELLUNG

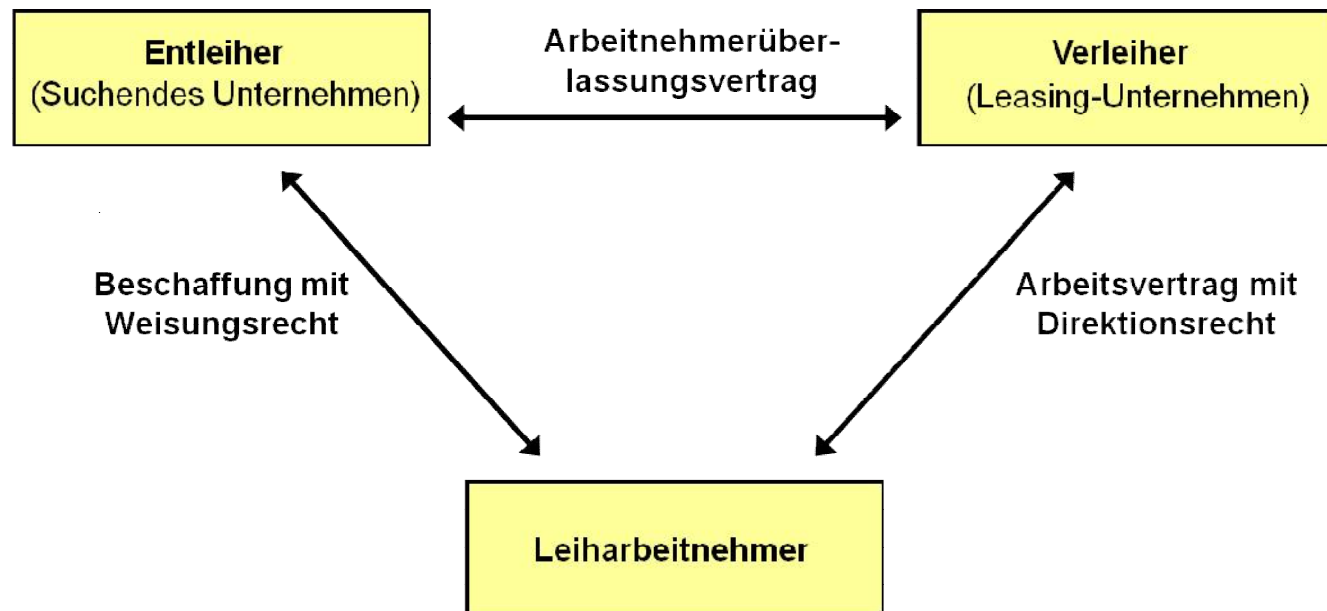

Seite 908, Abb. 20: Rechtliche Beziehung der Personalleasing-Parteien



## KAPITEL H: PERSONALWIRTSCHAFT

### 2. PERSONELLE LEISTUNGSBEREITSTELLUNG

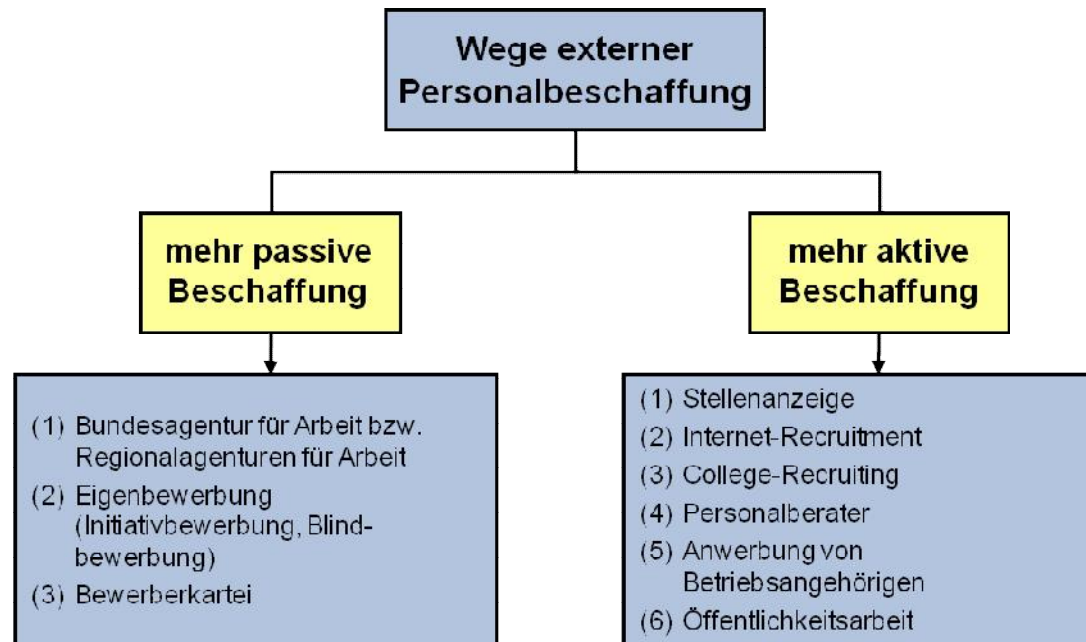

Seite 911, Abb. 21: Wege externer Personalbeschaffung

## KAPITEL H: PERSONALWIRTSCHAFT

### 2. PERSONELLE LEISTUNGSBEREITSTELLUNG

| Wir sind      | Aussagen über das Unternehmen:                                                                                 |                                                                            |
|---------------|----------------------------------------------------------------------------------------------------------------|----------------------------------------------------------------------------|
|               | Firmenname<br>Firmenzeichen<br>Branche                                                                         | Produktionsprogramm<br>Standort des Unternehmens<br>Größe des Unternehmens |
| Wir haben     | Aussagen über die freie Stelle:                                                                                |                                                                            |
|               | Ausschreibungsgrund<br>Aufgabenbeschreibung<br>Verantwortungsumfang                                            | Über- bzw. Unterstellungen<br>Vertretungsmacht<br>Entwicklungschancen      |
| Wir suchen    | Aussagen über die Anforderungsmerkmale:                                                                        |                                                                            |
|               | Berufsbezeichnung<br>Vor- und Ausbildung<br>Kenntnisse und Fähigkeiten                                         | Berufserfahrung<br>Persönliche Eigenschaften<br>Teamarbeit                 |
| Wir bieten    | Aussagen über die Leistungen:                                                                                  |                                                                            |
|               | Hinweis auf Lohnhöhe/Gehaltshöhe<br>Spesen, Urlaub, Fahrtkostenzuschuss<br>Unterstützung bei der Wohnungssuche | Freizeitwert<br>Sozialleistungen<br>Gleitende Arbeitszeit                  |
| Wir bitten um | Nennung der Bewerbungsunterlagen:                                                                              |                                                                            |
|               | Bewerbungsschreiben<br>Lebenslauf                                                                              | Zeugnisse<br>Persönliche Vorstellung                                       |

Seite 913, Abb. 22: Inhaltlicher Aufbau einer Stellenanzeige

## KAPITEL H: PERSONALWIRTSCHAFT

### 2. PERSONELLE LEISTUNGSBEREITSTELLUNG

| Bewerber                                                            |                                                                                                    |
|---------------------------------------------------------------------|----------------------------------------------------------------------------------------------------|
| Vorteile                                                            | Nachteile                                                                                          |
| Fast kostenloser Zugriff 24 Stunden auf Stellenanzeigen             | Eingeschränktes Angebot bei Berufsgruppen                                                          |
| Zeitersparnis, da eine spezifische Suche möglich ist                | Durch zunehmende Jobbörsen eine zunehmende Informationsflut                                        |
| Einfachheit durch Suchroutine                                       | PC mit Internetzugang erforderlich                                                                 |
| Unternehmen                                                         |                                                                                                    |
| Vorteile                                                            | Nachteile                                                                                          |
| Durch das Internet Erschließung neuer interessanter Bewerbergruppen | Es müssen neben Internetjobangeboten auch noch Stellen in sogenannten Printmedien angeboten werden |
| Imagegewinn in der Öffentlichkeit                                   | Unklare Erfolgsaussichten                                                                          |
| Direkte Kontaktaufnahme zu Bewerbern per E-Mail                     | Gefahr aufgrund einer Flut von Bewerbungen                                                         |

Seite 915, Abb. 23: Vor- und Nachteile des E-Recruitment

## KAPITEL H: PERSONALWIRTSCHAFT

### 2. PERSONELLE LEISTUNGSBEREITSTELLUNG

|                 | Interne Personalbeschaffung                                                                                                                                                                                                                                                                                                                                                                                                                                    | Externe Personalbeschaffung                                                                                                                                                                                                                                                                                           |
|-----------------|----------------------------------------------------------------------------------------------------------------------------------------------------------------------------------------------------------------------------------------------------------------------------------------------------------------------------------------------------------------------------------------------------------------------------------------------------------------|-----------------------------------------------------------------------------------------------------------------------------------------------------------------------------------------------------------------------------------------------------------------------------------------------------------------------|
| <b>Vorteile</b> | <ul style="list-style-type: none"> <li>– Eröffnung von Aufstiegschancen (erhöht die Bindung an den Betrieb, verbessert Betriebsklima)</li> <li>– Geringere Beschaffungskosten</li> <li>– Betriebskenntnis</li> <li>– Kennen des Mitarbeiters und seines Könnens (geringeres Risiko)</li> <li>– Einhaltung des betrieblichen Entgeltlevels (bei externer Einstellung ggf. überhöhtes Marktgehalt)</li> <li>– Schnellere Stellenbesetzungsmöglichkeit</li> </ul> | <ul style="list-style-type: none"> <li>– Breite Auswahlmöglichkeit</li> <li>– Neue Impulse für den Betrieb (Verringerung der Betriebsblindheit)</li> <li>– Der Externe wird leichter anerkannt</li> <li>– Einstellung löst Personalbedarf direkt</li> <li>– Eventuell Information über Konkurrenzverhalten</li> </ul> |

Seite 917, Abb. 24 (Teil 1): Vor- und Nachteile interner und externer Personalbeschaffung

## KAPITEL H: PERSONALWIRTSCHAFT

### 2. PERSONELLE LEISTUNGSBEREITSTELLUNG

|                  | Interne Personalbeschaffung                                                                                                                                                                                                                                                                                                                                                                                                                                                                                                                                                                                                                                                                                                                                                                                                            | Externe Personalbeschaffung                                                                                                                                                                                                                                                                                                                                                                   |
|------------------|----------------------------------------------------------------------------------------------------------------------------------------------------------------------------------------------------------------------------------------------------------------------------------------------------------------------------------------------------------------------------------------------------------------------------------------------------------------------------------------------------------------------------------------------------------------------------------------------------------------------------------------------------------------------------------------------------------------------------------------------------------------------------------------------------------------------------------------|-----------------------------------------------------------------------------------------------------------------------------------------------------------------------------------------------------------------------------------------------------------------------------------------------------------------------------------------------------------------------------------------------|
| <b>Nachteile</b> | <ul style="list-style-type: none"> <li>– Weniger Auswahlmöglichkeiten</li> <li>– Ggf. hohe Fortbildungskosten</li> <li>– Mögliche Betriebsblindheit</li> <li>– Enttäuschung bei Kollegen, evtl. weniger Anerkennung bei Aufrücken in Vorgesetztenfunktion, ggf. auch Spannungen/ Rivalitäten</li> <li>– Zu starke kollegiale Bindungen, Sachentscheidungen werden verkumpelt</li> <li>– Stellenbesetzung/Beförderung "um des lieben Frieden willen". Man will dem langgedienten Mitarbeiter nicht "nein" sagen.</li> <li>– Nachlassende Mitarbeiterkreativität wegen Beförderungsautomatik, man verlässt sich auf die Nachfolge (Vertreter wird immer Nachfolger)</li> <li>– Versetzung löst Bedarf quantitativ nicht, qualitativ oft nur in Verbindung mit Fortbildung und bei vertikaler Beförderung mit Führungsschulung</li> </ul> | <ul style="list-style-type: none"> <li>– Größere Beschaffungskosten</li> <li>– Höhere externe Einstellungsquote wirkt fluktuations- und frustrationsfördernd ("Hier kann man nichts werden")</li> <li>– Negative Auswirkung auf das Betriebsklima</li> <li>– Höheres Risiko durch Probezeit</li> <li>– Keine Betriebskenntnisse (allgemeine Einführung erforderlich - Kosten/Zeit)</li> </ul> |

Seite 917, Abb. 24 (Teil 2): Vor- und Nachteile interner und externer Personalbeschaffung

## KAPITEL H: PERSONALWIRTSCHAFT

### 2. PERSONELLE LEISTUNGSBEREITSTELLUNG

| Bewerbungsunterlagen     | Kriterien              | Aussagefähigkeit |        |        |
|--------------------------|------------------------|------------------|--------|--------|
|                          |                        | groß             | mittel | gering |
| 1. Anschreiben           | Form                   |                  | •      |        |
|                          | Inhalt                 |                  | •      |        |
|                          | Berufliche Aussagen    | •                |        |        |
|                          | Berufliche Erwartungen | •                |        |        |
| 2. Lebenslauf            | Form                   |                  | •      |        |
|                          | Inhalt                 | •                |        |        |
| 3. Foto                  | Größe/Farbe/Alter      |                  |        | •      |
| 4. Schulzeugnis          | Ausbildungsdauer       |                  | •      |        |
|                          | Notentrend             |                  | •      |        |
| 5. Ausbildungszeugnis    | Ausbildungsdauer       |                  | •      |        |
|                          | Notentrend             | •                |        |        |
|                          | Benotungsschwerpunkt   |                  | •      |        |
| 6. Weiterbildungszeugnis | Fachbereiche           | •                |        |        |
|                          | Bewertung              | •                |        |        |
| 7. Arbeitszeugnis        | Leistung               | •                |        |        |
|                          | Führung                | •                |        |        |
| 8. Referenzen            |                        |                  |        | •      |
| 9. Personalbogen         |                        |                  | •      |        |
| 10. Arbeitsproben        |                        | •                |        |        |

Seite 919, Abb. 25: Bedeutung von Bewerbungsunterlagen  
(Vgl. Jung, H.: Personalwirtschaft, 10. Aufl., Berlin / Boston 2016, S. 156 ff.)

## KAPITEL H: PERSONALWIRTSCHAFT

### 2. PERSONELLE LEISTUNGSBEREITSTELLUNG

| Ergebnisse des Vorstellungsgesprächs (Auswertungsbogen)                                                                                                               |           |   |     |   |    |                                              |                |
|-----------------------------------------------------------------------------------------------------------------------------------------------------------------------|-----------|---|-----|---|----|----------------------------------------------|----------------|
| Kriterium                                                                                                                                                             | Bewertung |   |     |   |    | Einfluss des Kriteriums auf die Entscheidung |                |
|                                                                                                                                                                       | ++        | + | +/- | - | -- | eher wichtig                                 | eher unwichtig |
| 1. Fachwissen                                                                                                                                                         |           |   |     |   |    |                                              |                |
| Wissensbreite                                                                                                                                                         |           |   |     |   |    |                                              |                |
| Spezialwissen                                                                                                                                                         |           |   |     |   |    |                                              |                |
| Praxiswissen                                                                                                                                                          |           |   |     |   |    |                                              |                |
| 2. Intellektuelle Fähigkeiten<br>(z.B. Auffassungsgabe, Kreativität)                                                                                                  |           |   |     |   |    |                                              |                |
| 3. Motivation<br>(z.B. Interesse an der Aufgabe, Zielstrebigkeit)                                                                                                     |           |   |     |   |    |                                              |                |
| 4. Kooperationsvermögen                                                                                                                                               |           |   |     |   |    |                                              |                |
| 5. Kontaktfähigkeit                                                                                                                                                   |           |   |     |   |    |                                              |                |
| 6. Äußere Erscheinung                                                                                                                                                 |           |   |     |   |    |                                              |                |
| 7. Auftreten                                                                                                                                                          |           |   |     |   |    |                                              |                |
| 8. Selbständigkeit                                                                                                                                                    |           |   |     |   |    |                                              |                |
| 9. Urteilsvermögen                                                                                                                                                    |           |   |     |   |    |                                              |                |
| 10. Ausdrucksvermögen                                                                                                                                                 |           |   |     |   |    |                                              |                |
| 11. Belastbarkeit                                                                                                                                                     |           |   |     |   |    |                                              |                |
| 12. Initiative / Dynamik                                                                                                                                              |           |   |     |   |    |                                              |                |
| 13. Vertrauenswürdigkeit                                                                                                                                              |           |   |     |   |    |                                              |                |
| 14. Offenheit                                                                                                                                                         |           |   |     |   |    |                                              |                |
| <b>Weitere Kriterien, die die Entscheidung beeinflussen:</b><br>positiv: _____ negativ: _____                                                                         |           |   |     |   |    |                                              |                |
| <b>Entscheidung</b> <small>mit</small> <input type="checkbox"/> <small>geteilt</small> <small>mit Beden-</small> <input type="checkbox"/> <small>kung geteilt</small> |           |   |     |   |    |                                              |                |

Seite 921, Abb. 26: Fragebogen zur Beurteilung des Vorstellungsgesprächs

## KAPITEL H: PERSONALWIRTSCHAFT

### 2. PERSONELLE LEISTUNGSBEREITSTELLUNG

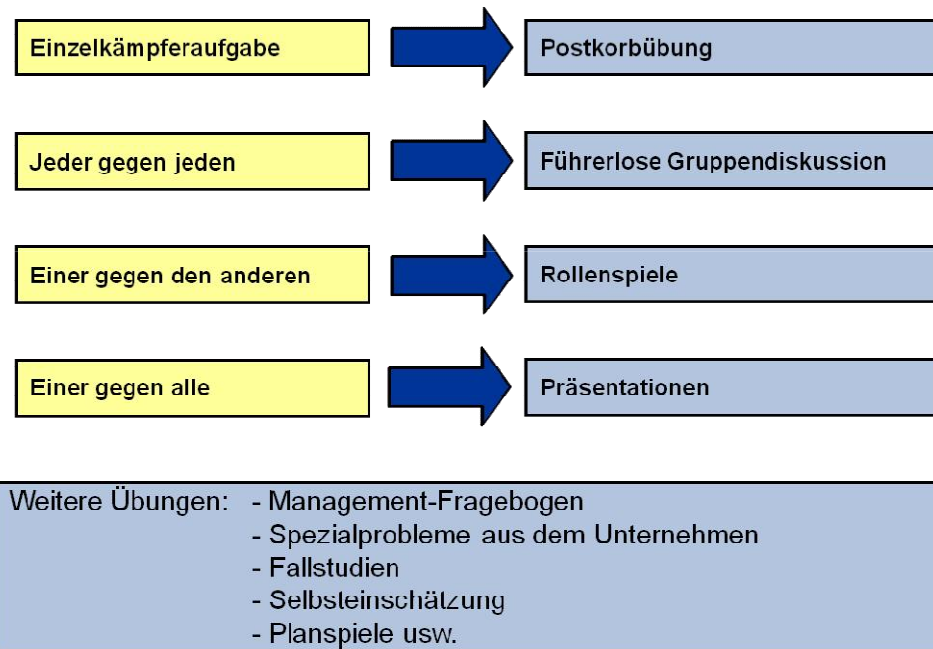

Seite 924, Abb. 27: Übungen im Rahmen eines Assessment.Centers



## KAPITEL H: PERSONALWIRTSCHAFT

### 2. PERSONELLE LEISTUNGSBEREITSTELLUNG

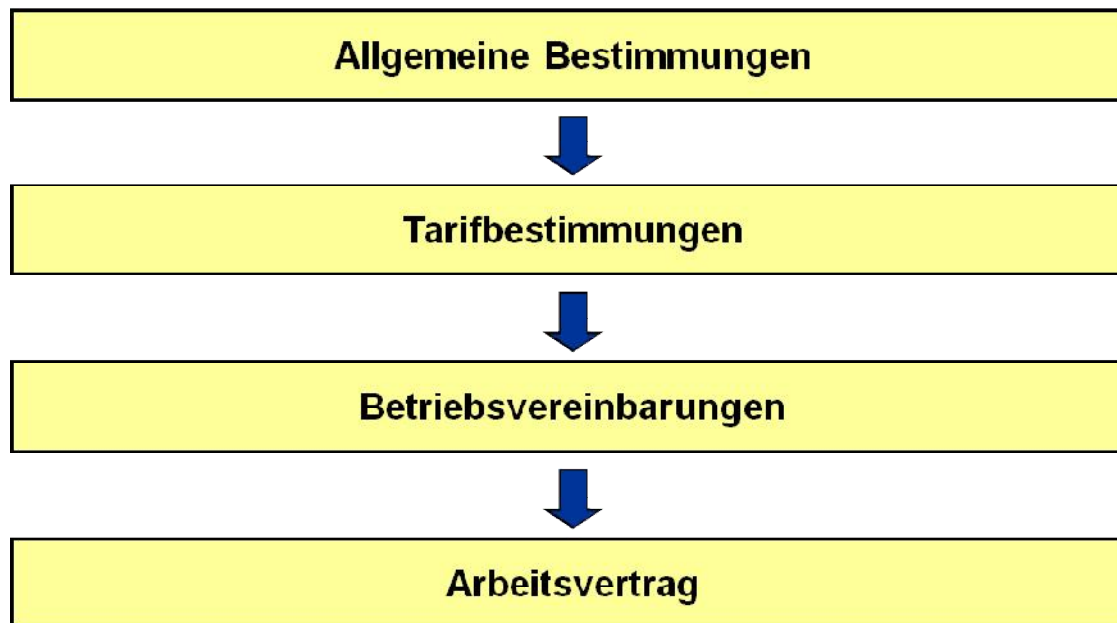

Seite 926, Abb. 28: Rangstufe der Bestimmungen im Hinblick auf den Arbeitsvertrag

## KAPITEL H: PERSONALWIRTSCHAFT

### 2. PERSONELLE LEISTUNGSBEREITSTELLUNG

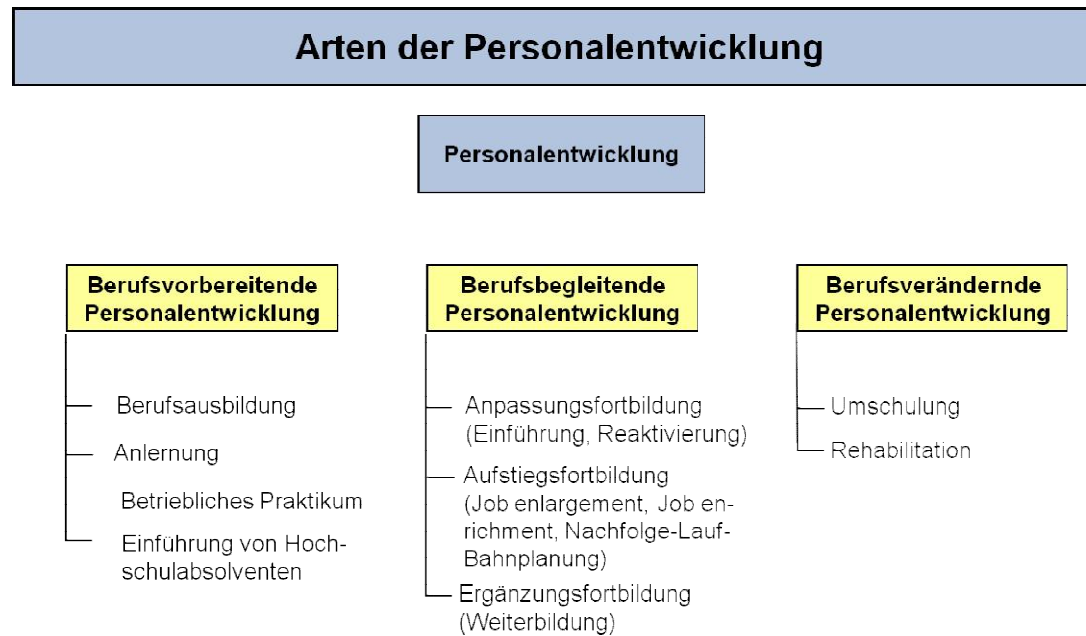

Seite 930, Abb. 29: Arten der Personalentwicklung

## KAPITEL H: PERSONALWIRTSCHAFT

### 2. PERSONELLE LEISTUNGSBEREITSTELLUNG

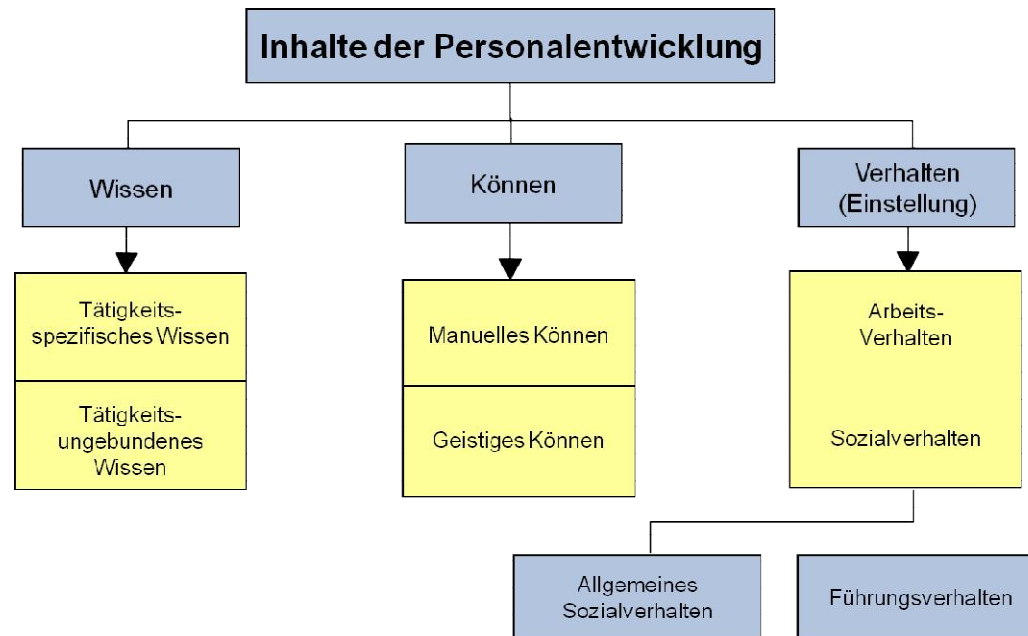

Seite 934, Abb. 30: Inhalt der betrieblichen Bildungsarbeit

## KAPITEL H: PERSONALWIRTSCHAFT

### 2. PERSONELLE LEISTUNGSBEREITSTELLUNG

| Methoden der Personalentwicklung              |                                               |
|-----------------------------------------------|-----------------------------------------------|
| am Arbeitsplatz<br>(on the job)               | außerhalb des Arbeitsplatzes<br>(off the job) |
| (1) Planmäßige Unterweisung                   | (1) Programmierte Unterweisung                |
| (2) Anleitung/Beratung durch den Vorgesetzten | (2) Vortrag, Referat und Vorlesung            |
| (3) Job rotation                              | (3) Konferenzmethode                          |
| (4) Übertragung begrenzter Verantwortung      | (4) Fallstudien, Rollenspiel                  |
| (5) Übertragung von Sonderaufgaben            | (5) Planspiel                                 |
| (6) Multiple Management (Juniorvorstand)      | (6) Gruppendynamische Methoden                |
| (7) Trainee-Programm                          | (7) Assessment-Center                         |
| (8) Einführungsprogramme                      | (8) E-Learning                                |

Seite 935, Abb. 31: Methoden der Personalentwicklung

## KAPITEL H: PERSONALWIRTSCHAFT

### 2. PERSONELLE LEISTUNGSBEREITSTELLUNG

| Maßnahmen der Personalfreisetzung                                                                                                                                                                                                                                   |                                                                                                                                                                                                                                                          |                                                                                                              |                                                                                                                                                            |                                                                                                                                    |
|---------------------------------------------------------------------------------------------------------------------------------------------------------------------------------------------------------------------------------------------------------------------|----------------------------------------------------------------------------------------------------------------------------------------------------------------------------------------------------------------------------------------------------------|--------------------------------------------------------------------------------------------------------------|------------------------------------------------------------------------------------------------------------------------------------------------------------|------------------------------------------------------------------------------------------------------------------------------------|
| Quantitative Maßnahmen                                                                                                                                                                                                                                              |                                                                                                                                                                                                                                                          |                                                                                                              |                                                                                                                                                            | Qualitative Maßnahmen                                                                                                              |
| Maßnahmen der Produktions- und Absatzplanung                                                                                                                                                                                                                        | Arbeitszeitverkürzende Maßnahmen                                                                                                                                                                                                                         | Indirekte Maßnahmen                                                                                          | Direkte Maßnahmen                                                                                                                                          |                                                                                                                                    |
| <ul style="list-style-type: none"> <li>– Erweiterte Lagerhaltung</li> <li>– Rücknahme von Fremdaufträgen</li> <li>– Vorziehen von Reparatur- u. Erneuerungsaufgaben</li> <li>– Produktdiversifikation</li> <li>– Intensivierung der Marketingaktivitäten</li> </ul> | <ul style="list-style-type: none"> <li>– Abbau von Mehrarbeit bzw. Überstunden</li> <li>– Einführung von Kurzarbeit</li> <li>– Kürzung der regulären Arbeitszeit</li> <li>– Urlaubsplanung</li> <li>– Umwandlung von Voll- in Teilzeitstellen</li> </ul> | <ul style="list-style-type: none"> <li>– Einstellungsbeschränkung</li> <li>– Abbau von Leiharbeit</li> </ul> | <ul style="list-style-type: none"> <li>– Vorzeitige Pensionierung</li> <li>– Aufhebungsverträge</li> <li>– Entlassungen</li> <li>– Outplacement</li> </ul> | <ul style="list-style-type: none"> <li>– Maßnahmen der Personalentwicklung</li> <li>– Arbeitsorganisatorische Maßnahmen</li> </ul> |

Seite 945, Abb. 32: Maßnahmen der Personalfreisetzung

## KAPITEL H: PERSONALWIRTSCHAFT

### 2. PERSONELLE LEISTUNGSBEREITSTELLUNG

| Betriebsgröße<br>(Arbeitnehmer) | Entlassungen von mehr als ... Arbeitnehmern<br>innerhalb von 30 Kalendertagen |
|---------------------------------|-------------------------------------------------------------------------------|
| 21 – 59                         | 5                                                                             |
| 60 – 499                        | 10 %, aber mindestens 25                                                      |
| über 499                        | 30                                                                            |

Seite 949, Abb. 33: Bedingungen der Massenentlassung

## KAPITEL H: PERSONALWIRTSCHAFT

### 2. PERSONELLE LEISTUNGSBEREITSTELLUNG

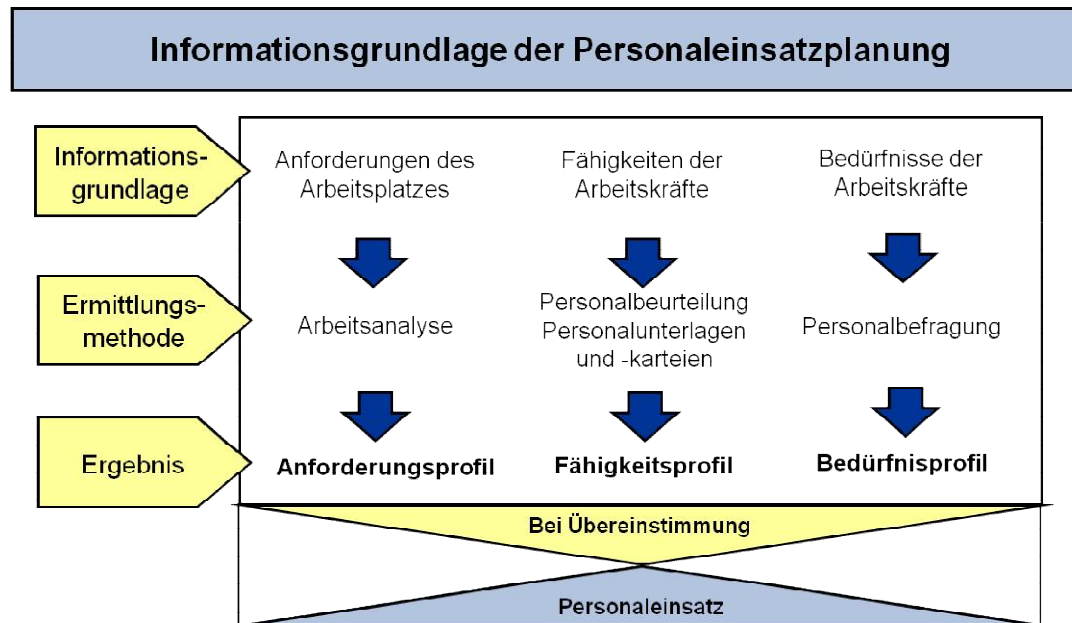

Seite 951, Abb. 34: Informationsgrundlagen der Personaleinsatzplanung

## KAPITEL H: PERSONALWIRTSCHAFT

### 2. PERSONELLE LEISTUNGSBEREITSTELLUNG

| Zeitraum                       | Qualitativ                                                                                                                                          | Quantitativ                                                                              |
|--------------------------------|-----------------------------------------------------------------------------------------------------------------------------------------------------|------------------------------------------------------------------------------------------|
| <b>Kurzfristig</b>             | <b>Zuordnung</b><br>durch den Vergleich von Anforderungsprofil und Fähigkeitsprofil der vorhandenen Mitarbeiter                                     | <b>Zuordnung</b><br>durch die Erstellung von Schichtplänen                               |
| <b>Mittel- und langfristig</b> | <b>Anpassung</b><br>der Arbeitsplatzanforderungen durch Arbeitsstrukturmaßnahmen<br>Fähigkeiten der Mitarbeiter durch Personalentwicklungsmaßnahmen | <b>Anpassung</b><br>durch Personalbeschaffungsmaßnahmen<br>Personalfreisetzungsmaßnahmen |

Seite 952, Abb. 35: Aufgaben der Personaleinsatzplanung



## KAPITEL H: PERSONALWIRTSCHAFT

### 2. PERSONELLE LEISTUNGSBEREITSTELLUNG

| Soll-Personalbestand<br>Name des Mitarbeiters | A  |    |    | B  |    | C  | D  | E  | F  |    | G  |    | H  | Bezeichnung der Arbeitsplätze |
|-----------------------------------------------|----|----|----|----|----|----|----|----|----|----|----|----|----|-------------------------------|
|                                               | 1  | 1  | 1  | 1  | 1  | 1  | 1  | 1  | 1  | 1  | 1  | 1  | 1  |                               |
| Preuß, W.                                     | ++ | ++ | ++ | +  | +  | -  | -  | -  | -  | -  | -  | -  | -  | A Kranfahrer                  |
| Blanck, K.                                    | ++ | ++ | ++ | +  | +  | +  | +  | +  | +  | +  | +  | +  | +  | B Anhänger                    |
| Lechner, E.                                   | +  | ++ | ++ | +  | +  | -  | -  | -  | -  | -  | -  | -  | -  | C Elektrofahrer               |
| Funke, H.                                     | +  | +  | +  | ++ | ++ | ++ | -  | -  | -  | -  | -  | -  | -  | D Bohrer                      |
| Eberle, S.                                    | +  | +  | +  | ++ | ++ | +  | ++ | ++ | ++ | ++ | ++ | ++ | ++ | E Mechatroniker               |
| Lux, B.                                       | -  | -  | -  | +  | +  | ++ | -  | -  | -  | -  | -  | -  | -  | F Abstecher große Bank        |
| Conrad, S.                                    | -  | -  | -  | +  | +  | -  | ++ | ++ | +  | +  | +  | +  | +  | G Abstecher kleine Bank       |
| Mertens, T.                                   | -  | -  | -  | -  | -  | -  | ++ | ++ | -  | -  | -  | -  | -  | H Säger                       |
| König, L.                                     | -  | -  | -  | -  | -  | -  | +  | +  | ++ | ++ | ++ | ++ | +  | ++ Sehr gut geeignet          |
| Leder, G.                                     | +  | +  | +  | ++ | ++ | -  | ++ | ++ | ++ | ++ | ++ | ++ | ++ | + Gut geeignet                |
| Schmidt, R.                                   | -  | -  | -  | -  | -  | -  | +  | +  | ++ | ++ | ++ | ++ | ++ | - Nur mit Einarbeitungszeit   |
| Schneider, D.                                 | -  | -  | -  | -  | -  | -  | +  | +  | ++ | ++ | ++ | ++ | ++ | -- Wenig geeignet             |
| Hellweg, H.                                   | ++ | ++ | ++ | +  | +  | +  | +  | +  | -  | -  | -  | -  | ++ | ■ Stammbeschäftigung          |

Seite 953, Abb. 36: Beispiel einer qualitativen summarischen Zuordnung

## KAPITEL H: PERSONALWIRTSCHAFT

### 2. PERSONELLE LEISTUNGSBEREITSTELLUNG

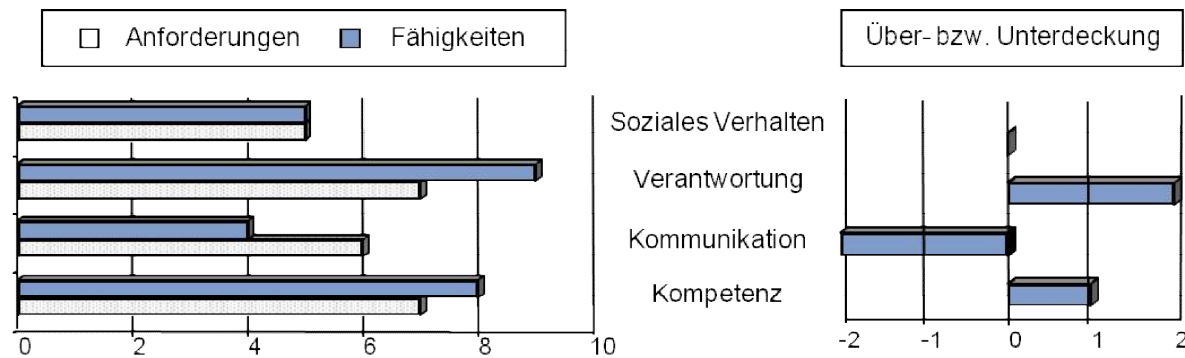

Seite 955, Abb. 37: Grafische Darstellung des Profilvergleichs

## KAPITEL H: PERSONALWIRTSCHAFT

### 2. PERSONELLE LEISTUNGSBEREITSTELLUNG

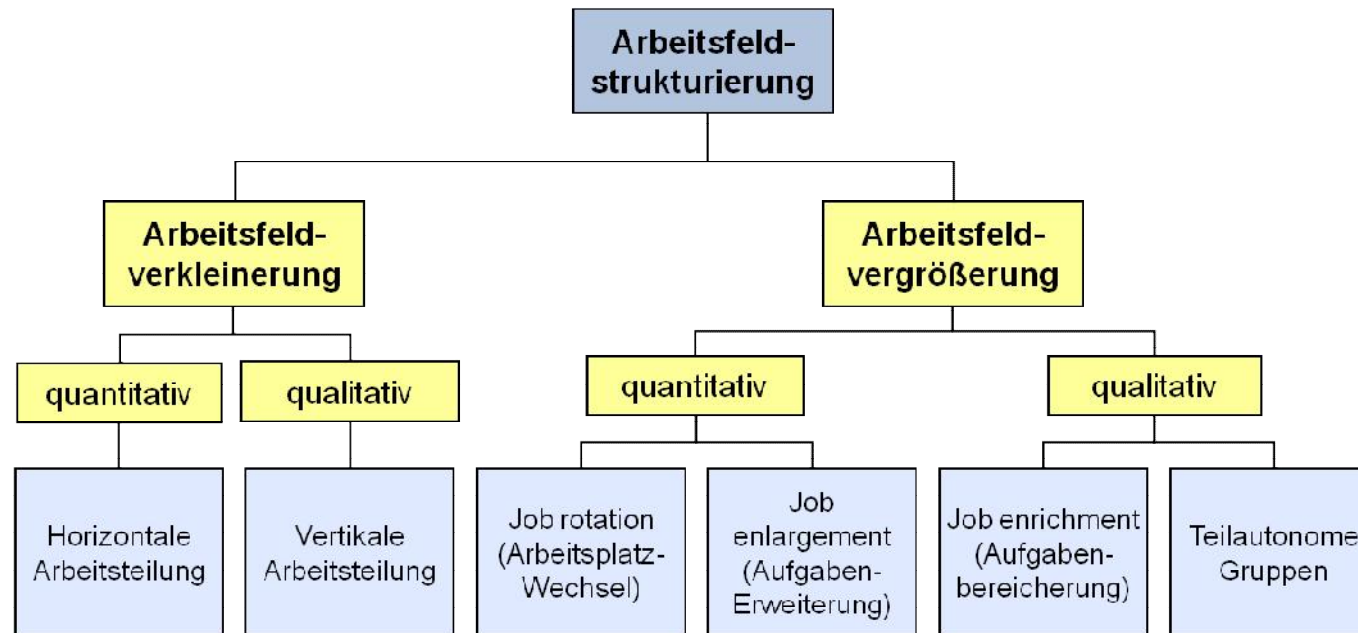

Seite 956, Abb. 38: Grundformen der Arbeitsfeldstrukturierung

### **3. DAS PERSONAL ALS TRÄGER VON BEDÜRFNISSEN UND WERTEN**

3.1 ARBEITSMOTIVATION, ARBEITSLEISTUNG, ARBEITSZUFRIEDENHEIT

3.2 PERSONALENTLOHNUNG

3.3 BETRIEBLICHE SOZIALLEISTUNGEN

3.4 ERFOLGS- UND KAPITALBETEILIGUNGEN

3.5 BETRIEBLICHES VORSCHLAGSWESEN

## KAPITEL H: PERSONALWIRTSCHAFT

### 3. DAS PERSONAL ALS TRÄGER VON BEDÜRFNISSEN UND WERTEN

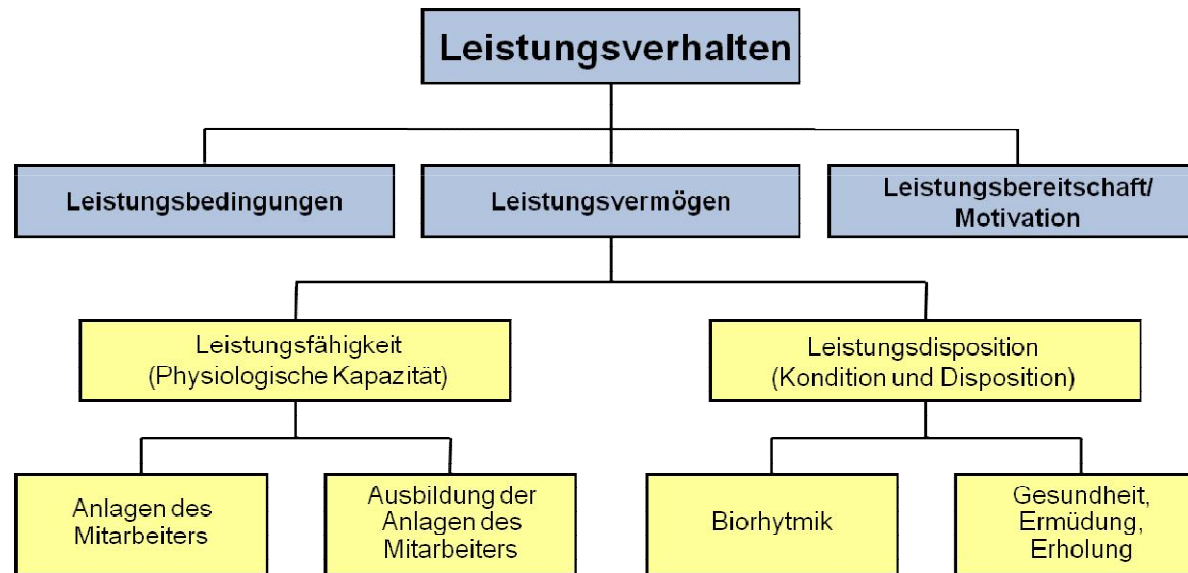

Seite 959, Abb. 39: Bestimmungsfaktoren menschlicher Arbeitsleistung

## KAPITEL H: PERSONALWIRTSCHAFT

### 3. DAS PERSONAL ALS TRÄGER VON BEDÜRFNISSEN UND WERTEN

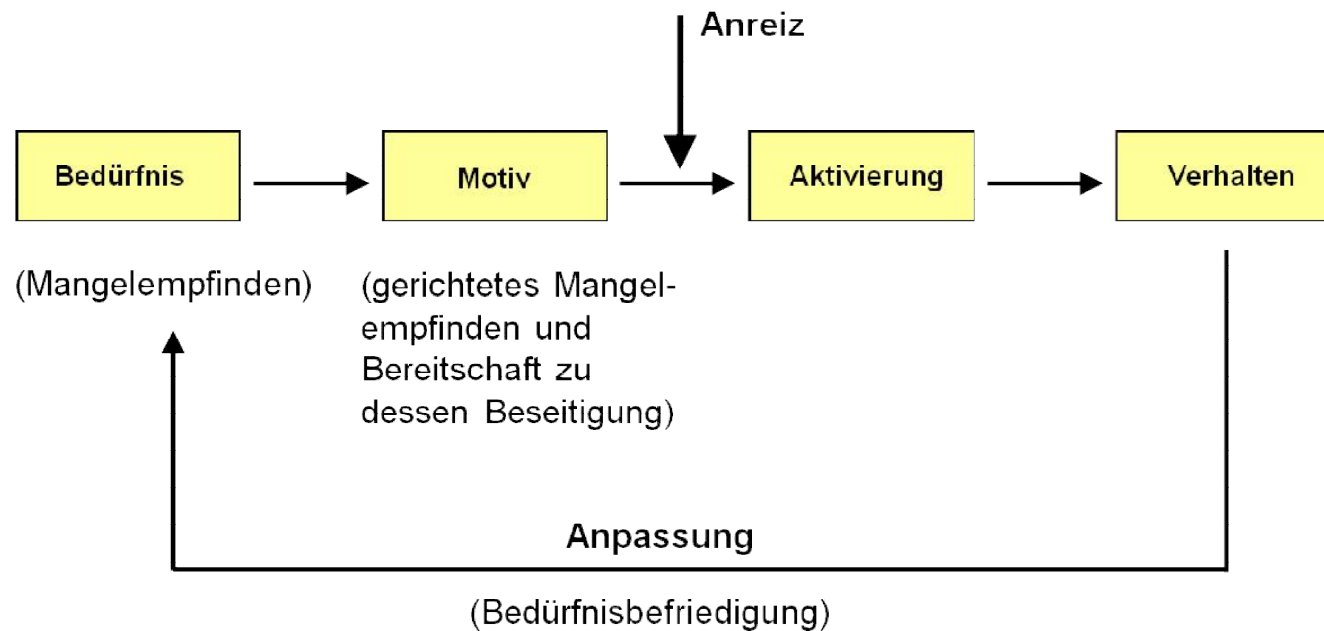

Seite 960, Abb. 40: Motivationsprozess

(Vgl. Comelli, G./ von Rosenstiel, L.: Führung durch Motivation. Mitarbeiter für Unternehmensziele gewinnen, 4. Aufl., München 2009, S. 28 ff.)

Jung: Allgemeine Betriebswirtschaftslehre. De Gruyter Oldenbourg 2016. ISBN 978-3-486-76376-8

## KAPITEL H: PERSONALWIRTSCHAFT

### 3. DAS PERSONAL ALS TRÄGER VON BEDÜRFNISSEN UND WERTEN

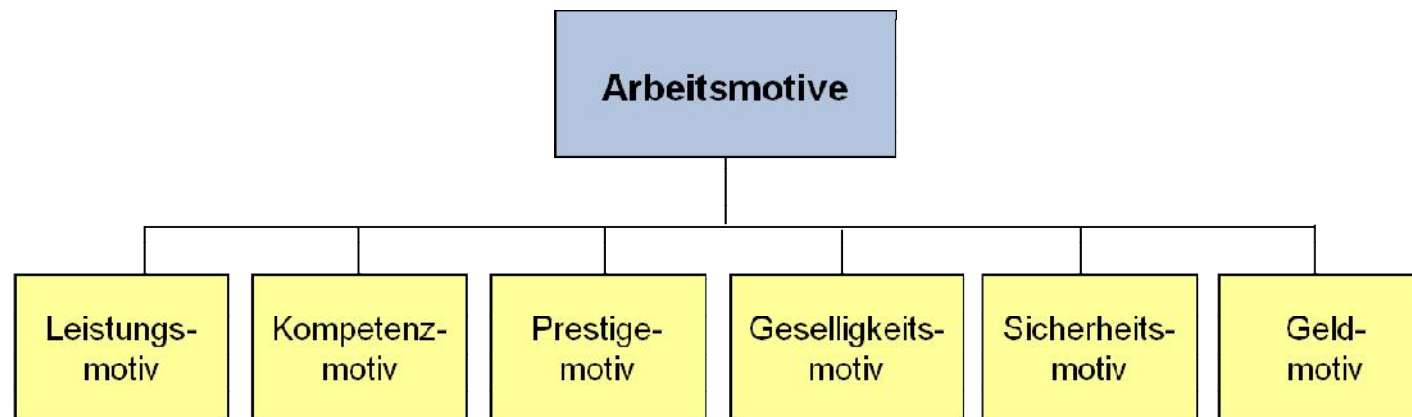

Seite 961, Abb. 41: Arbeitsmotive

## KAPITEL H: PERSONALWIRTSCHAFT

### 3. DAS PERSONAL ALS TRÄGER VON BEDÜRFNISSEN UND WERTEN

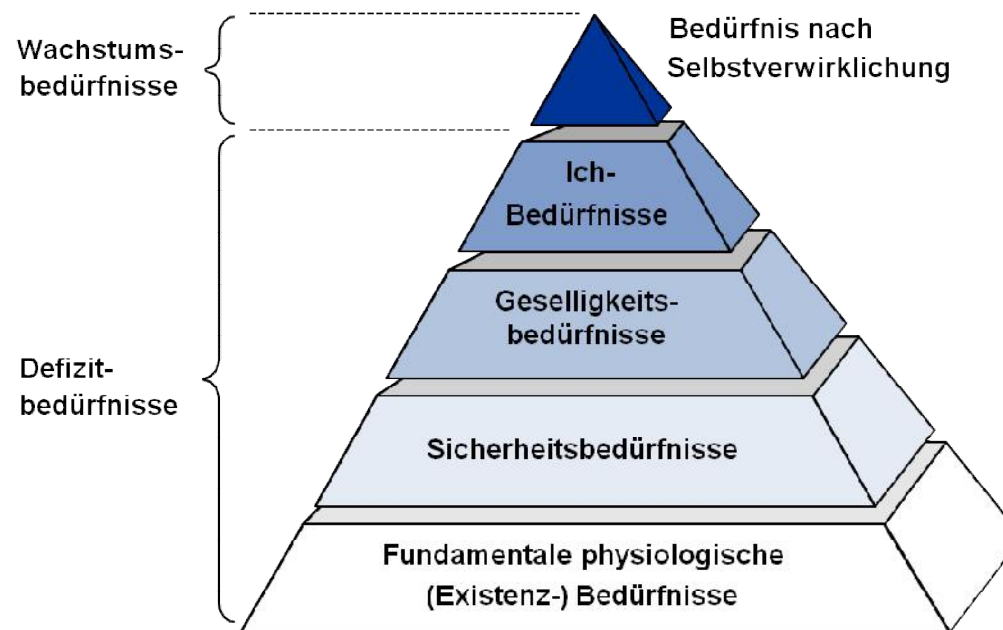

Seite 963, Abb. 42: Die Bedürfnispyramide von Maslow (1954)



## KAPITEL H: PERSONALWIRTSCHAFT

### 3. DAS PERSONAL ALS TRÄGER VON BEDÜRFNISSEN UND WERTEN

| Gliederung nach Maslow     | Überlappungsbereich            | Gliederung nach Alderfer |
|----------------------------|--------------------------------|--------------------------|
| Physiologische Bedürfnisse | Physiologische Bedürfnisse     | Existenzbedürfnisse      |
| Sicherheit                 | materielle Sicherheit          |                          |
| Zugehörigkeit              | Zwischenmenschliche Sicherheit | Beziehungsbedürfnisse    |
| Wertschätzung              | Liebe                          |                          |
|                            | Schätzung durch andere         | Wachstumsbedürfnisse     |
|                            | Selbstwertgefühl               |                          |
| Selbstverwirklichung       | Selbstverwirklichung           |                          |

Seite 965, Abb. 43: Gliederung der Bedürfnisse nach Alderfer und nach Maslow

## KAPITEL H: PERSONALWIRTSCHAFT

### 3. DAS PERSONAL ALS TRÄGER VON BEDÜRFNISSEN UND WERTEN

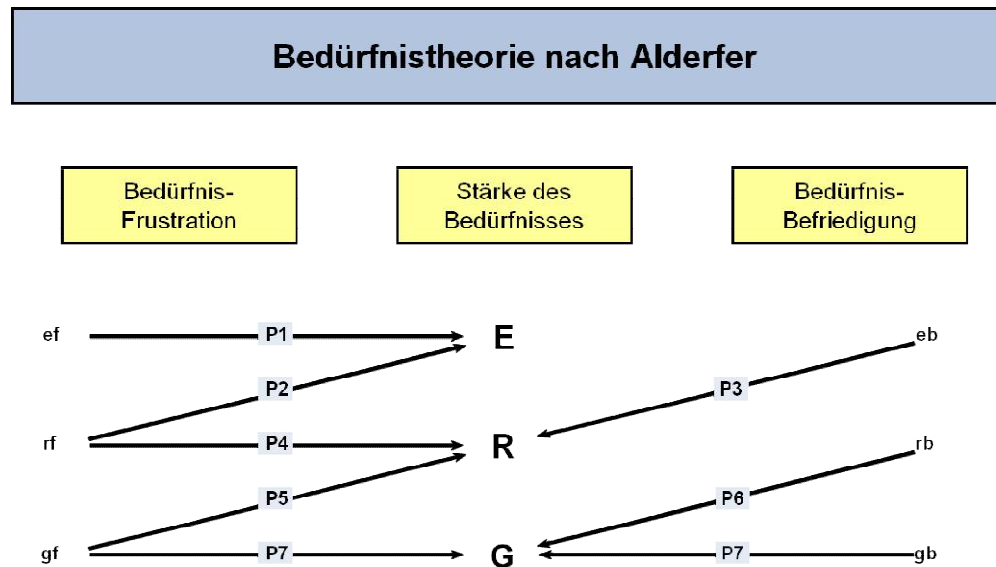

Seite 965, Abb. 44: Die Bedürfnistheorie von Alderfer

## KAPITEL H: PERSONALWIRTSCHAFT

### 3. DAS PERSONAL ALS TRÄGER VON BEDÜRFNISSEN UND WERTEN

| Theorie X                                                                                                                                                                                                                | Theorie Y                                                                                                                                                                                                                                                                     |
|--------------------------------------------------------------------------------------------------------------------------------------------------------------------------------------------------------------------------|-------------------------------------------------------------------------------------------------------------------------------------------------------------------------------------------------------------------------------------------------------------------------------|
| Dem Durchschnittsmenschen ist eine Abneigung gegenüber der Arbeit angeboren, und er versucht, Arbeit zu vermeiden, wo immer er kann.                                                                                     | Sich physisch oder geistig anzustrengen, ist dem Menschen ebenso eigen wie der Spieltrieb. Darüber hinaus kann die Arbeit sowohl Befriedigung als auch Enttäuschung hervorrufen.                                                                                              |
| Als Folge der Abneigung gegenüber der Arbeit muss der Mensch gezwungen, kontrolliert, ausgerichtet, bedroht, bestraft werden, um die erwartete Leistung zu erbringen.                                                    | Äußere Kontrolle und Androhung von Strafen sind allgemein nicht wirksam, um einen Menschen zu veranlassen, bestimmte Ziele zu erreichen. Er zieht es vor, innerhalb des Zielsystems, mit dem er sich identifiziert, Eigenverantwortung und Selbstkontrolle zu übernehmen.     |
| Der Durchschnittsmensch zieht es vor, angeleitet zu werden; er versucht, Verantwortung abzuwälzen, entwickelt wenig Ehrgeiz, verlangt nach Sicherheit und möchte sich vor allem wie die Mehrheit der Menschen verhalten. | Der Mensch übernimmt nicht Verantwortung, sondern sucht sie. Scheu vor Verantwortung, Mangel an Ehrgeiz sowie vorherrschendes Sicherheitsdenken sind Folgen misslicher Erfahrung, nicht jedoch charakteristisch für die Menschen.                                             |
| Die intellektuellen Fähigkeiten des Durchschnittsmenschen werden nur teilweise genutzt.                                                                                                                                  | Einfallsreichtum und Kreativität finden sich unter Menschen weit mehr, als generell vermutet.                                                                                                                                                                                 |
| Das zentrale Führungsprinzip besteht aus Anleitung und Kontrolle, die nur mit Autorität durchgesetzt werden können.                                                                                                      | Das zentrale Führungsprinzip besteht in der Integration: Die Schaffung solcher Bedingungen, unter denen die Mitglieder der Organisation ihre eigenen Anstrengungen so ausrichten, dass sie ihre eigenen Ziele im Rahmen der Gesamtleistung des Unternehmens erreichen können. |
| Die organisatorischen Erfordernisse bestehen ohne Rücksicht auf die Bedürfnisse der Organisierten. Für die gebotene Belohnung akzeptiert der Mensch Autorität und Kontrolle.                                             | Das Unternehmen wird in dem Maße leistungsfähiger, in dem die persönlichen Wünsche und Ziele seiner Mitarbeiter mitberücksichtigt werden.                                                                                                                                     |
| Ungenutzte Fähigkeiten gibt es nicht. Deshalb besteht auch kein Grund, Zeit, Geld und Anstrengungen zu investieren, um eventuelle Fähigkeiten voll zu nutzen.                                                            | Das Management ist herausgefordert, Neuerungen einzuführen (Innovation), neue Möglichkeiten der Zusammenarbeit zu entdecken, und den menschlichen Einsatz anzuleiten.                                                                                                         |

Seite 967, Abb. 45: Die wichtigsten Annahmen der Theorie X und Y

## KAPITEL H: PERSONALWIRTSCHAFT

### 3. DAS PERSONAL ALS TRÄGER VON BEDÜRFNISSEN UND WERTEN

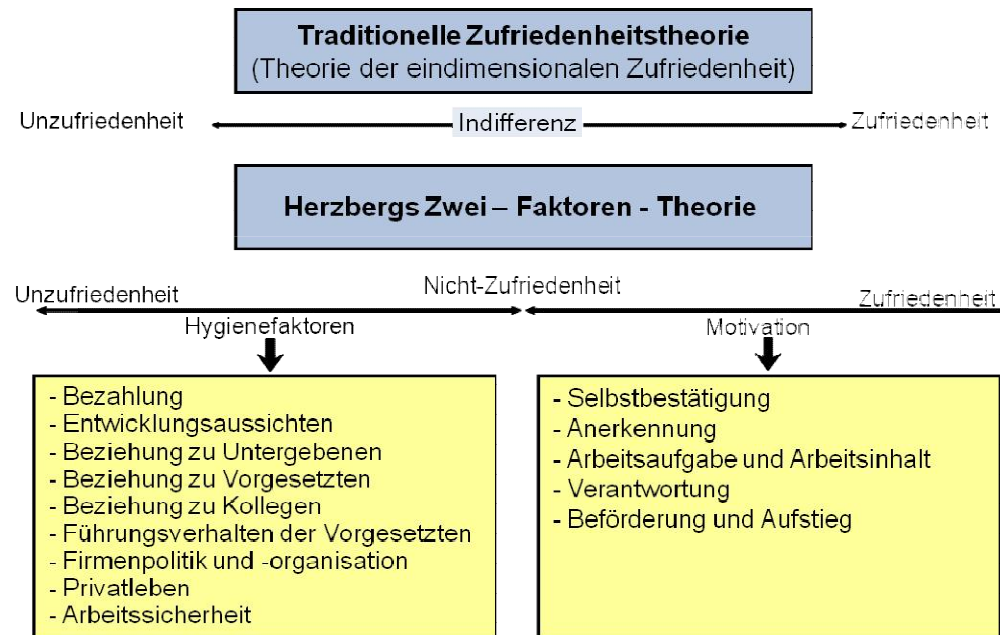

Seite 968, Abb. 46: Vergleich der traditionellen Zufriedenheitstheorie mit Herzbergs Zwei-Faktoren-Theorie

## KAPITEL H: PERSONALWIRTSCHAFT

### 3. DAS PERSONAL ALS TRÄGER VON BEDÜRFNISSEN UND WERTEN

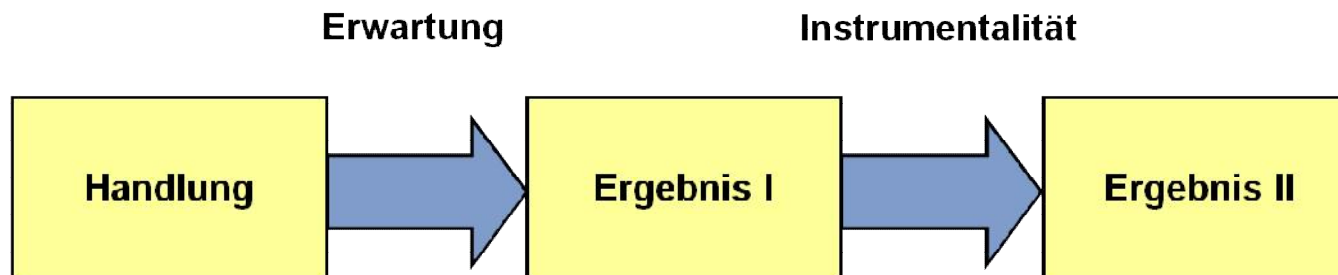

Seite 970, Abb. 47: Erwartung und Instrumentalität in der Erwartungsalenzttheorie

## KAPITEL H: PERSONALWIRTSCHAFT

### 3. DAS PERSONAL ALS TRÄGER VON BEDÜRFNISSEN UND WERTEN

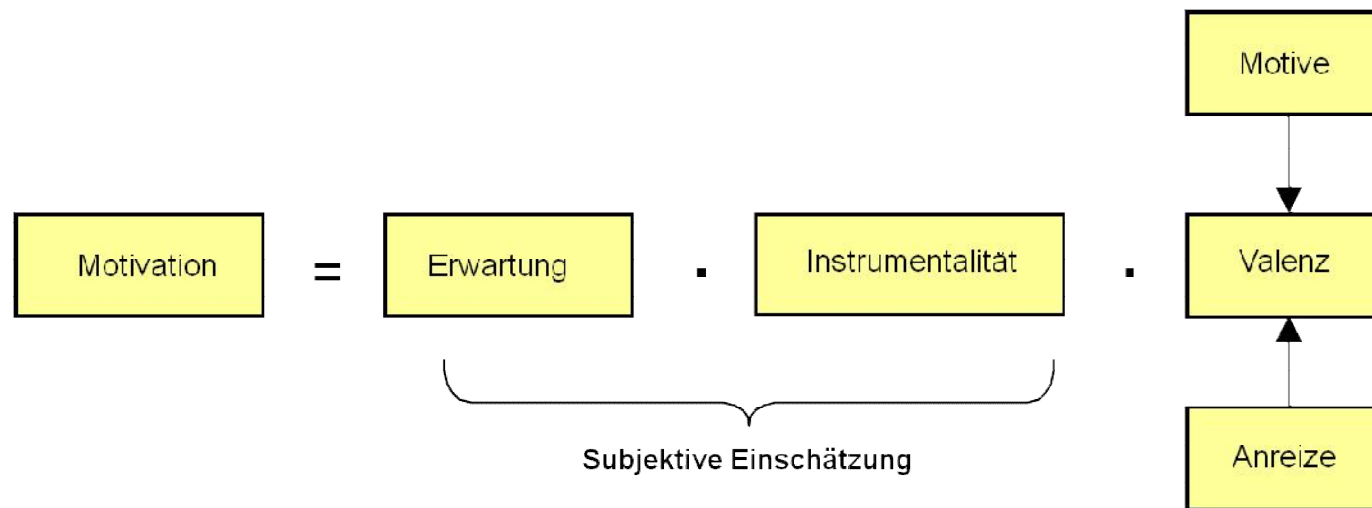

Seite 970, Abb. 48: Bestimmungsfaktoren der Motivation in der Erwartungsvalenztheorie

## KAPITEL H: PERSONALWIRTSCHAFT

### 3. DAS PERSONAL ALS TRÄGER VON BEDÜRFNISSEN UND WERTEN

| Gleichgewicht                                         | Ungleichgewicht                                          |
|-------------------------------------------------------|----------------------------------------------------------|
| $\frac{L ( M )}{B ( M )} = \frac{L ( RP )}{B ( RP )}$ | $\frac{L ( M )}{B ( M )} \neq \frac{L ( RP )}{B ( RP )}$ |

mit:

- $L ( M )$  = Leistungen des Mitarbeiters
- $B ( M )$  = Belohnungen für den Mitarbeiter
- $L ( RP )$  = Leistungen der Vergleichspersonen
- $B ( RP )$  = Belohnungen für die Vergleichspersonen

Seite 971, Abb. 49: Gleichgewicht und Ungleichgewicht in der Gleichheitstheorie

## KAPITEL H: PERSONALWIRTSCHAFT

### 3. DAS PERSONAL ALS TRÄGER VON BEDÜRFNISSEN UND WERTEN

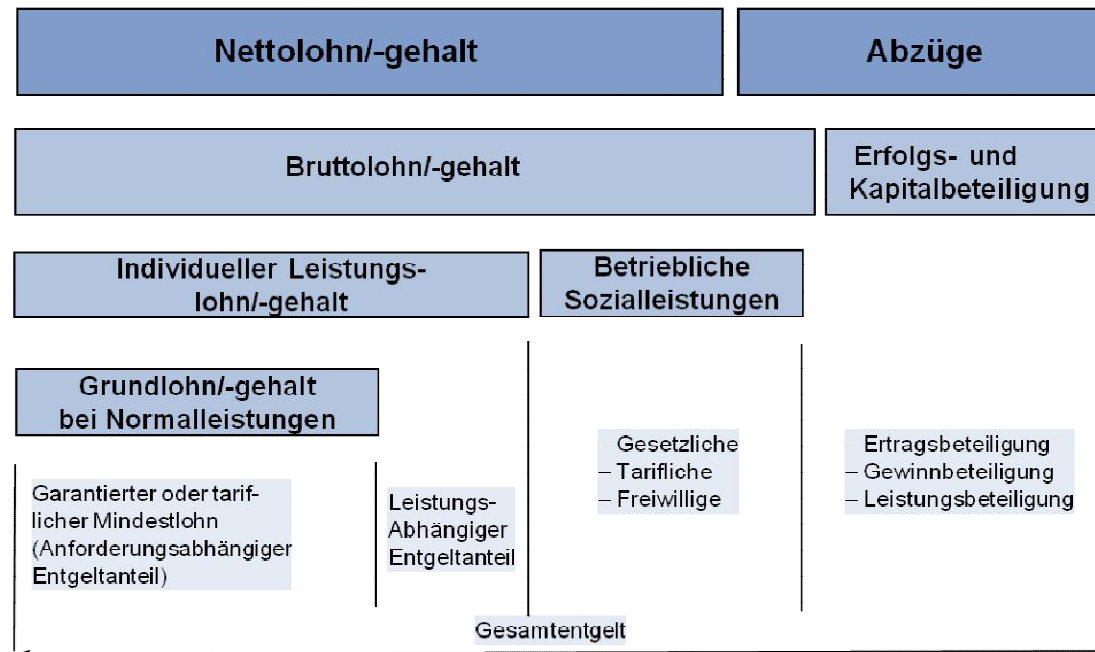

Seite 972, Abb. 50: Bestandteile des Arbeitsentgeltes



## KAPITEL H: PERSONALWIRTSCHAFT

### 3. DAS PERSONAL ALS TRÄGER VON BEDÜRFNISSEN UND WERTEN

| <div>Methoden der qualitativen Analyse</div> <div>Methoden der Quantifizierung</div> | Summarisch           | Analytisch              |
|--------------------------------------------------------------------------------------|----------------------|-------------------------|
| Reihung                                                                              | Rangfolgeverfahren   | Rangreihenverfahren     |
| Stufung                                                                              | Lohngruppenverfahren | Stufenwertzahlverfahren |

Seite 973, Abb. 51: Verfahren der Arbeitsbewertung

## KAPITEL H: PERSONALWIRTSCHAFT

### 3. DAS PERSONAL ALS TRÄGER VON BEDÜRFNISSEN UND WERTEN

|                                  | Können                                                                                                                                                  | Belastung                                                                                                                                                                              |
|----------------------------------|---------------------------------------------------------------------------------------------------------------------------------------------------------|----------------------------------------------------------------------------------------------------------------------------------------------------------------------------------------|
| <b>Geistige Anforderungen</b>    | <ul style="list-style-type: none"> <li>• Fachkenntnisse</li> <li>• Berufserfahrung</li> <li>• Befähigung, fachlich zu denken und zu urteilen</li> </ul> | <ul style="list-style-type: none"> <li>• Nachdenken</li> <li>• Aufmerksamkeit</li> <li>• Angestregtes Beobachten</li> </ul>                                                            |
| <b>Körperliche Anforderungen</b> | <ul style="list-style-type: none"> <li>• Geschicklichkeit</li> <li>• Handfertigkeit</li> </ul>                                                          | <ul style="list-style-type: none"> <li>• Überwindung von Arbeitswiderständen (dynamische Belastung der Muskeln)</li> <li>• Arbeitshaltung (statische Belastung der Muskeln)</li> </ul> |
| <b>Verantwortung</b>             |                                                                                                                                                         | <ul style="list-style-type: none"> <li>• Verantwortungsbewusstes Arbeiten, um persönliche und sachliche Schäden zu vermeiden</li> </ul>                                                |
| <b>Arbeitsbedingungen</b>        |                                                                                                                                                         | <ul style="list-style-type: none"> <li>• Anforderungen, die den Organismus zusätzlich belasten und denen er passiv entspricht (Temperatur, Nässe, Lärm etc.)</li> </ul>                |

Seite 975, Abb. 52: Anforderungsarten nach dem Genfer Schema

## KAPITEL H: PERSONALWIRTSCHAFT

### 3. DAS PERSONAL ALS TRÄGER VON BEDÜRFNISSEN UND WERTEN

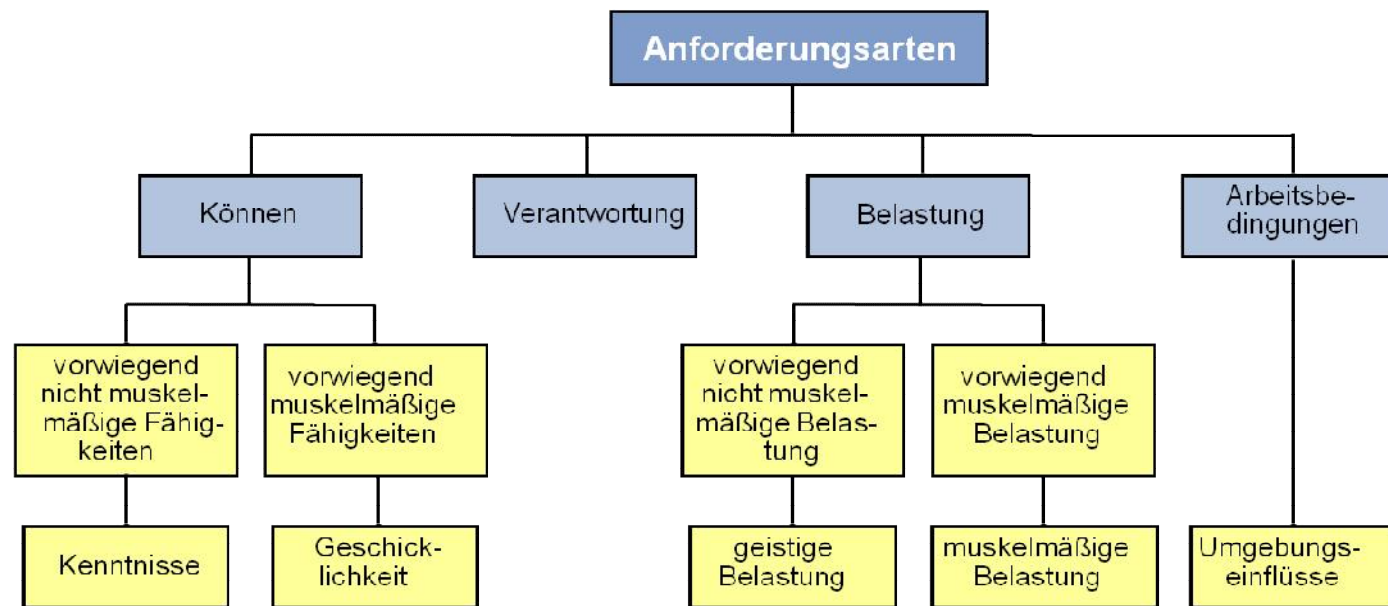

Seite 975, Abb. 53: Anforderungsarten nach REFA  
(Vgl. REFA: Methodenlehre der Betriebsorganisation: Anforderungsermittlung (Arbeitsbewertung), München 1989, S. 44.)

## KAPITEL H: PERSONALWIRTSCHAFT

### 3. DAS PERSONAL ALS TRÄGER VON BEDÜRFNISSEN UND WERTEN

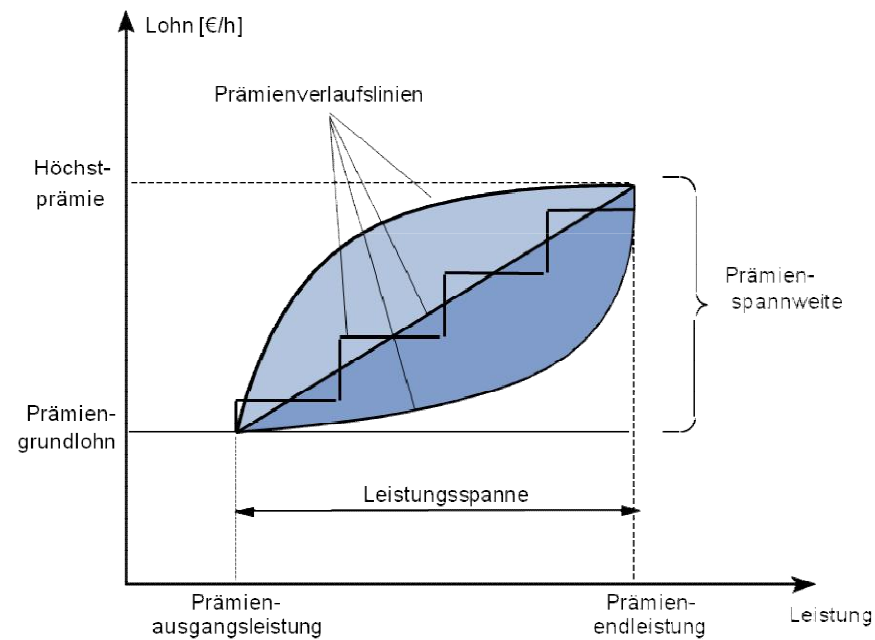

Seite 980, Abb. 54: Grundelemente des Prämienlohns

## KAPITEL H: PERSONALWIRTSCHAFT

### 3. DAS PERSONAL ALS TRÄGER VON BEDÜRFNISSEN UND WERTEN

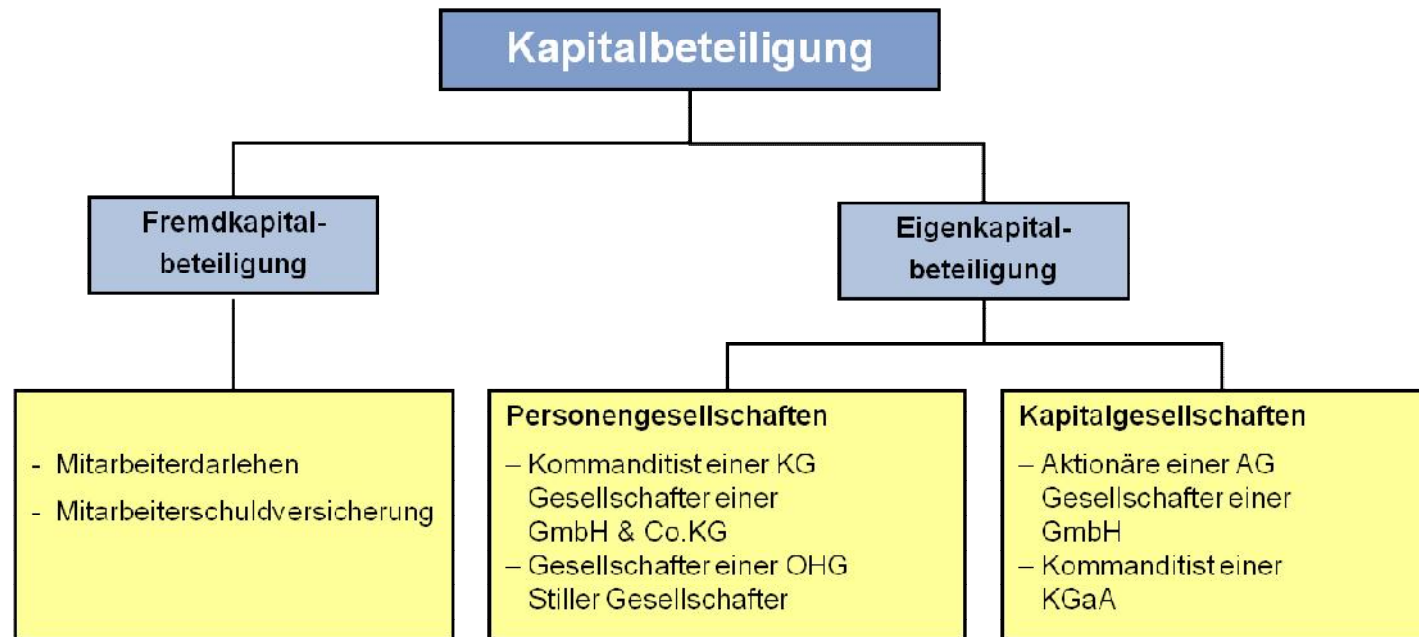

Seite 996, Abb. 55: Formen direkter Kapitalbeteiligung

## KAPITEL H: PERSONALWIRTSCHAFT

### 3. DAS PERSONAL ALS TRÄGER VON BEDÜRFNISSEN UND WERTEN

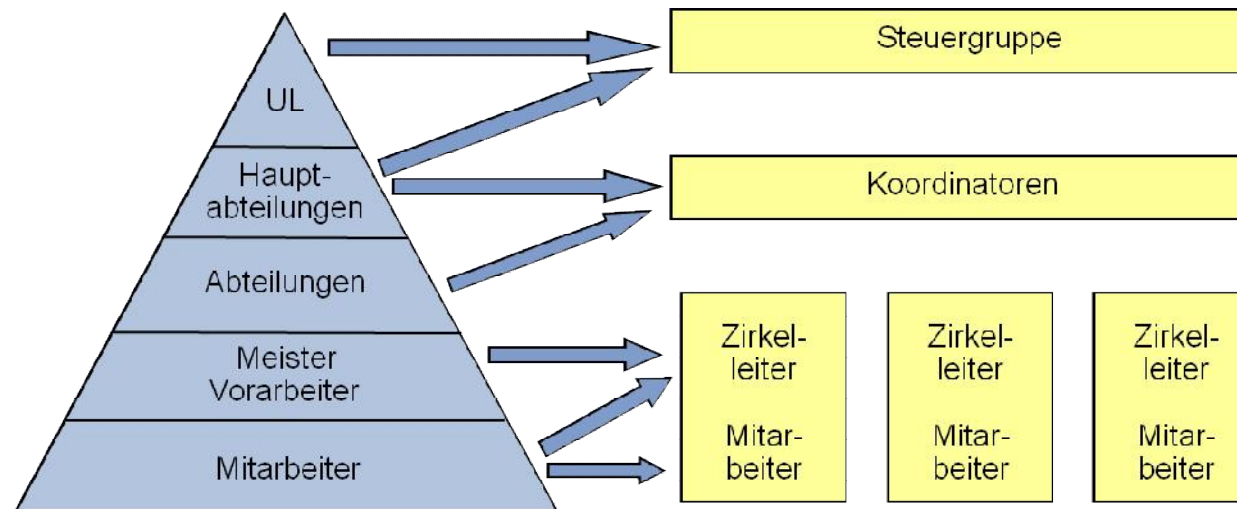

Seite 1000, Abb. 56: Verknüpfung der Unternehmensorganisation mit der Qualitätszirkelorganisation

## **4. INFORMATIONSSYSTEME DER PERSONALWIRTSCHAFT**

### **4.1 PERSONALBEURTEILUNG**

### **4.2 PERSONALVERWALTUNG**

## **5. ZUKUNFTSPERSPEKTIVEN DES PERSONALMANAGAMENTS**

5.1 WERTEWANDEL UND LEISTUNGSMOTIVATION

5.2 INTERNATIONALISIERUNG DES ARBEITSMARKTES UND EUROPÄISCHE UNION

5.3 DEMOGRAFISCHE ENTWICKLUNG AUF DEM ARBEITSMARKT

5.4 DIE VERÄNDERTE ROLLE DER FÜHRUNGSKRÄFTE IM PERSONALMANAGEMENT

5.5 TECHNOLOGISCHER WANDEL UND QUALIFIKATION

5.6 ARBEITSZEITFLEXIBILISIERUNG

5.7 MOBBING



## KAPITEL H: PERSONALWIRTSCHAFT

### 5. ZUKUNFTSPERSPEKTIVEN DES PERSONALMANAGEMENTS

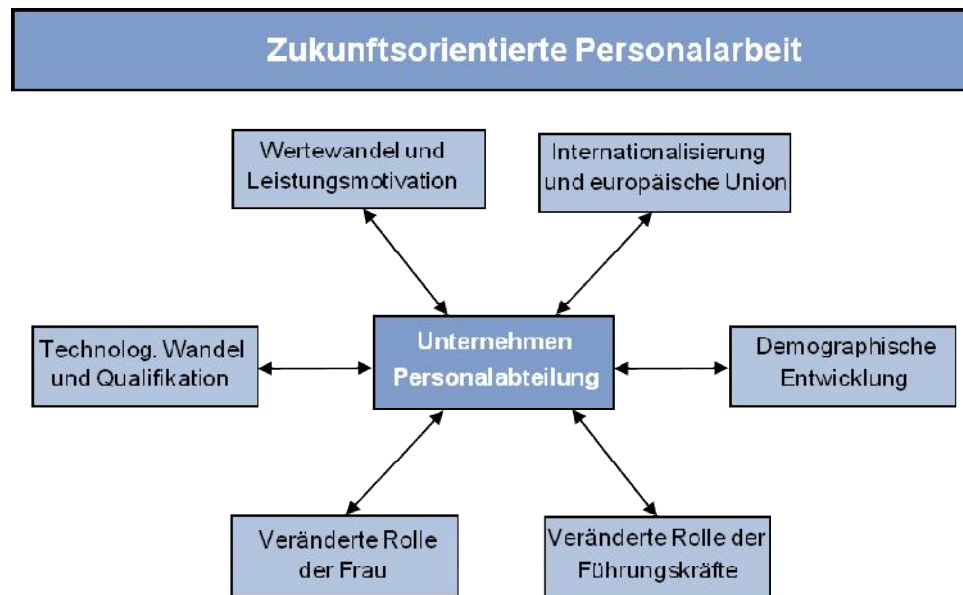

Seite 1008, Abb. 57: Zukunftsorientierte Personalarbeit

## KAPITEL H: PERSONALWIRTSCHAFT

### 5. ZUKUNFTSPERSPEKTIVEN DES PERSONALMANAGEMENTS

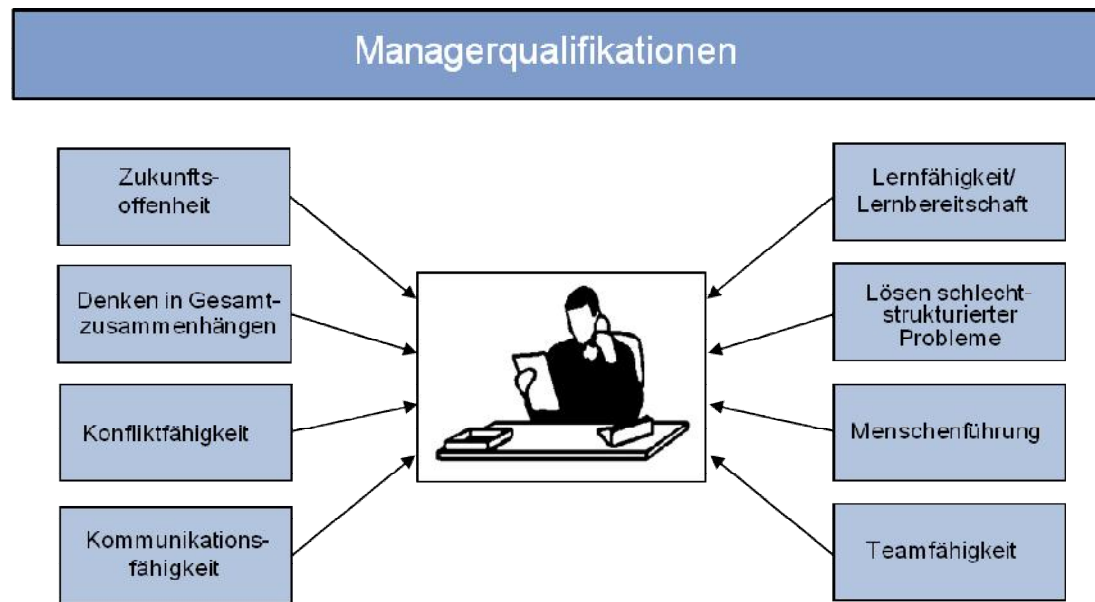

Seite 1012, Abb. 58: Zukunftswichtige Managerqualifikationen
