# Supplementary material
Source: publisher site journal article supplement (https://www.degruyterbrill.com/publication/isbn/9783486989434/downloadAsset/9783486989434_Folien--de.zip)
Supplement: Supplementary file 9 [file Teil_I_ABWL.pdf › Teil_I_ABWL.pdf]

# ZUSATZMATERIALIEN

## ALLGEMEINE BETRIEBSWIRTSCHAFTSLEHRE

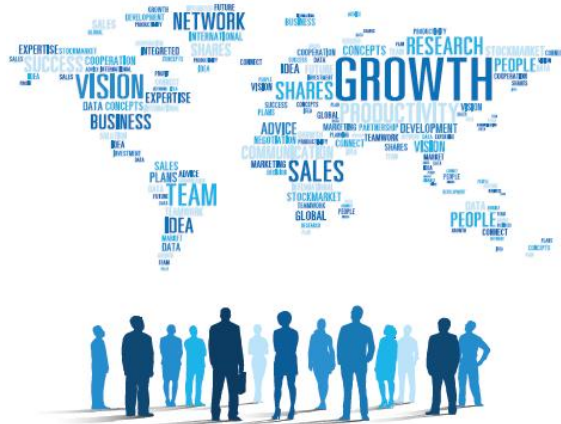

## **KAPITEL I: RECHNUNGSWESEN UND CONTROLLING**

1. EINFÜHRUNG IN DAS RECHNUNGSWESEN UND CONTROLLING
2. BILANZIERUNG UND JAHRESABSCHLUSS
3. KOSTENRECHNUNG
4. DAS CONTROLLING
5. TRENDS UND ENTWICKLUNGEN

# **1. EINFÜHRUNG IN DAS RECHNUNGSWESEN UND CONTROLLING**

1.1 AUFGABEN DES RECHNUNGSWESENS

1.2 PAGATORISCHE UND KALKULATORISCHE BUCHFÜHRUNG

1.3 STROMGRÖßEN UND BESTANDSGRÖßEN

# KAPITEL I: RECHNUNGSWESEN UND CONTROLLING

## 1. EINFÜHRUNG IN DAS RECHNUNGSWESEN UND CONTROLLING

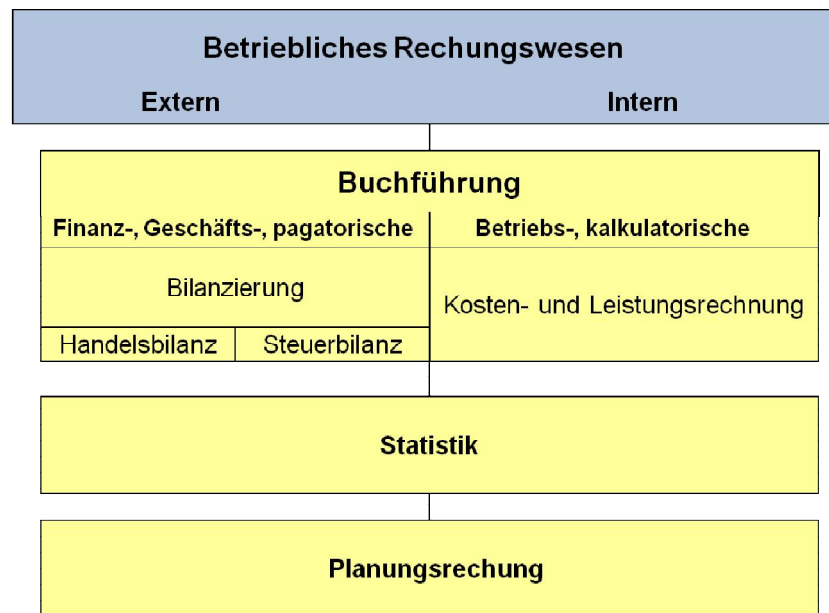

Seite 1024, Abb. 1: Darstellung des pagatorischen und kalkulatorischen Rechnungswesens



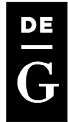

# KAPITEL I: RECHNUNGSWESEN UND CONTROLLING

## 1. EINFÜHRUNG IN DAS RECHNUNGSWESEN UND CONTROLLING

| 3. Buch HGB "Handelsbücher"                                 |                                                                                                      |                                                                          |
|-------------------------------------------------------------|------------------------------------------------------------------------------------------------------|--------------------------------------------------------------------------|
| 1. Abschnitt                                                | 2. Abschnitt                                                                                         | 3. Abschnitt                                                             |
| Grundlegende Vorschriften für alle Kaufleute (§§ 238 - 263) | Ergänzende Vorschriften für Kapitalgesellschaften (§§ 264 - 335)                                     | Ergänzende Vorschriften für eingetragene Genossenschaften (§§ 336 - 339) |
| Buchführung/Inventar (§§ 238 - 241)                         | Jahresabschluss der Kapitalgesellschaft und Lagebericht (§§ 264 - 289)                               |                                                                          |
| Eröffnungsbilanz/Jahresabschluss (§§ 242 - 256)             | Konzernabschluss und Konzernlagebericht (§§ 290 - 315)                                               |                                                                          |
| Aufbewahrung und Vorlage (§§ 257 - 261)                     | Prüfung (§§ 316 - 324)                                                                               |                                                                          |
| Sollkaufleute/Landesrecht (§§ 262, 263)                     | Offenlegung, Veröffentlichung und Vervielfältigung, Prüfung durch das Registergericht (§§ 325 - 329) |                                                                          |
|                                                             | Verordnungsermächtigung für Formblätter und andere Vorschriften (§ 330)                              |                                                                          |
|                                                             | Straf- und Bußgeldvorschriften, Zwangsgelder (§§ 331 - 335)                                          |                                                                          |

Seite 1025, Abb. 2: Einteilung 3. Buch HGB

# KAPITEL I: RECHNUNGSWESEN UND CONTROLLING

## 1. EINFÜHRUNG IN DAS RECHNUNGSWESEN UND CONTROLLING

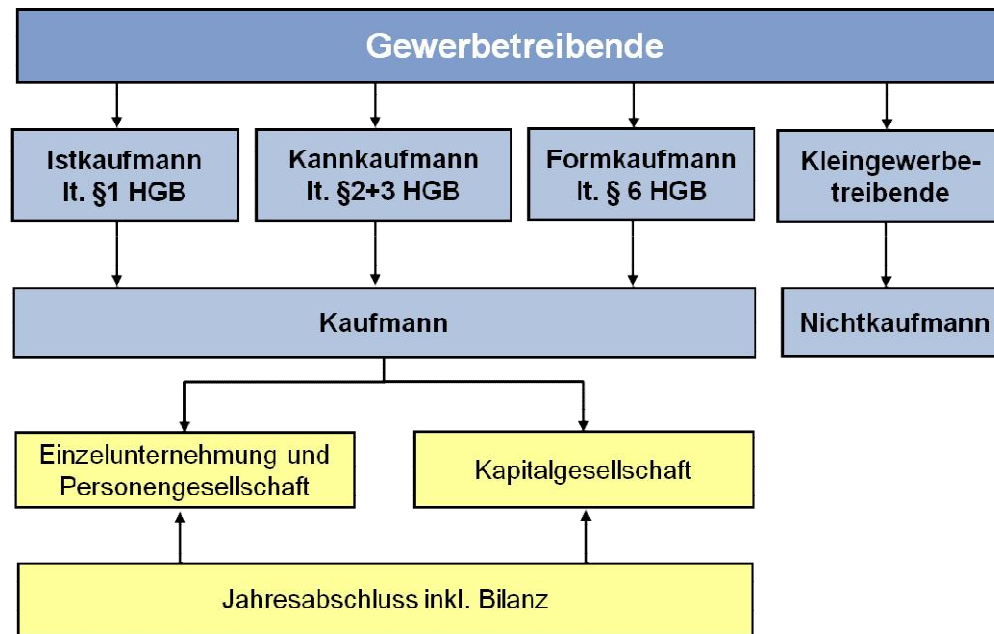

Seite 1026, Abb. 3: Kaufmannsarten

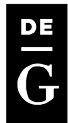

# KAPITEL I: RECHNUNGSWESEN UND CONTROLLING

## 1. EINFÜHRUNG IN DAS RECHNUNGSWESEN UND CONTROLLING

| Merkmal                   | Extern                                                                                                                                    |                                                                                                                                    | Intern                                                                                                                                                                                                                                  |
|---------------------------|-------------------------------------------------------------------------------------------------------------------------------------------|------------------------------------------------------------------------------------------------------------------------------------|-----------------------------------------------------------------------------------------------------------------------------------------------------------------------------------------------------------------------------------------|
|                           | Handelsbilanz                                                                                                                             | Steuerbilanz                                                                                                                       | Kostenrechnung                                                                                                                                                                                                                          |
| Gewinnbegriff             | Externer Erfolg, Geschäftserfolg oder Gewinn                                                                                              | Steuerlicher Erfolg oder zu versteuender Gewinn                                                                                    | Interner Erfolg oder Betriebserfolg                                                                                                                                                                                                     |
| Aussage                   | Gibt an, was das Unternehmen aus Transaktionen mit der Umwelt verdient hat                                                                | Gibt an, welche Bemessungsgrundlage der Besteuerung zugrunde zu legen ist                                                          | Gibt an, wie der Betrieb gearbeitet hat                                                                                                                                                                                                 |
| Ziel                      | Darstellung nach außen                                                                                                                    | Darstellung dem Finanzamt gegenüber                                                                                                | Auswertung für innere Ziele                                                                                                                                                                                                             |
| Organisation              | Geschäftsbuchhaltung                                                                                                                      | Steuerberater/Geschäftsbuchhaltung/ Steuerabteilung                                                                                | Betriebsbuchhaltung, Kostenrechnung                                                                                                                                                                                                     |
| Gesetzliche Verpflichtung | Handelsgesetzbuch (HGB) Aktiengesetz (AktG)                                                                                               | Einkommensteuergesetz Abgabenordnung (AO)                                                                                          | Keine (Ausnahme: öffentliche Verträge)                                                                                                                                                                                                  |
| Zeitraum                  | Jährlich                                                                                                                                  | Jährlich                                                                                                                           | Monatlich oder viertel-jährlich                                                                                                                                                                                                         |
| Aufgaben                  | Ermittlung des Jahreserfolges<br>Ermittlung der Vermögens- und Schuldbestände<br>Bereitstellung von Zahlenmaterial für dispositive Zwecke | Ermittlung des zu versteuernden Gewinns                                                                                            | Kurzfristige Erfolgsrechnung<br>Wirtschaftlichkeitskontrolle<br>Kalkulation der betrieblichen Leistung<br>Bereitstellung von Zahlenmaterial für dispositive Zwecke<br>Bereitstellung von Zahlenmaterial für die Bewertung von Beständen |
| Gewinn-ermittlung         | Externer Erfolg = Ertrag - Aufwand                                                                                                        | Steuerlicher Erfolg durch Betriebsvermögensvergleich bzw. durch Gegenüberstellung von Ertrag und Aufwand (§ 4 Abs. 1 und § 5 EStG) | Interner Erfolg = Leistung – Kosten                                                                                                                                                                                                     |

Seite 1027, Abb. 4: Gegenüberstellung von pagatorischer und kalkulatorischer Buchführung

# KAPITEL I: RECHNUNGSWESEN UND CONTROLLING

## 1. EINFÜHRUNG IN DAS RECHNUNGSWESEN UND CONTROLLING

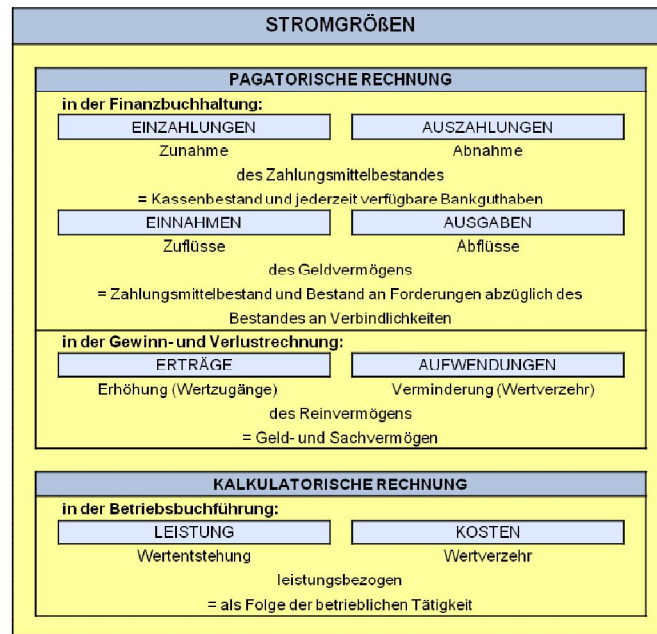

Seite 1029, Abb. 5: Darstellung der Stromgrößen  
(Vgl. Selchert, F. W.: Einführung in die Betriebswirtschaftslehre in Übersichtsdarstellungen, 3. Aufl., München / Wien 1991, S. 277.)

Jung: Allgemeine Betriebswirtschaftslehre. De Gruyter Oldenbourg 2016. ISBN 978-3-486-76376-8

# KAPITEL I: RECHNUNGSWESEN UND CONTROLLING

## 1. EINFÜHRUNG IN DAS RECHNUNGSWESEN UND CONTROLLING

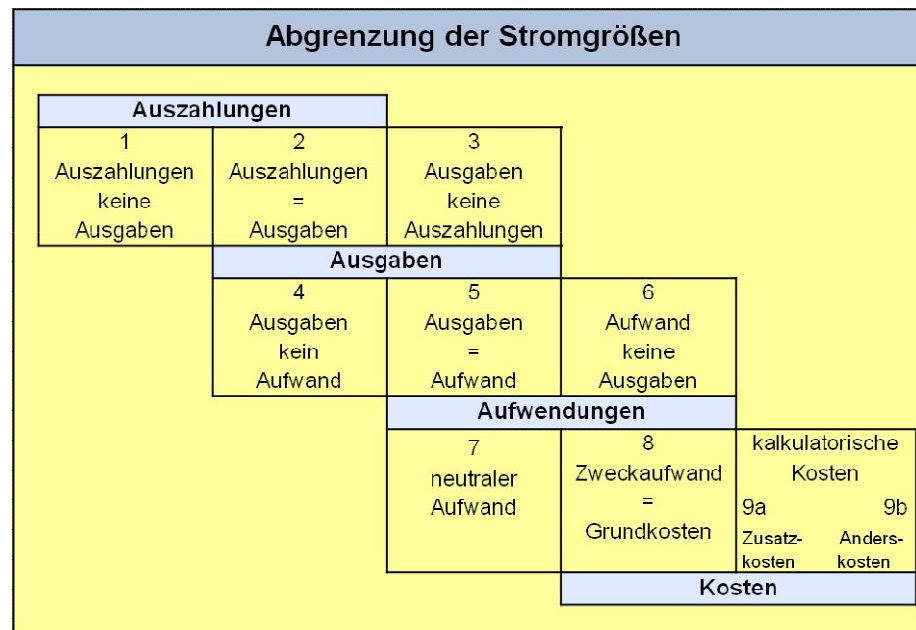

Seite 1030, Abb. 6: Abgrenzung der Stromgrößen

# KAPITEL I: RECHNUNGSWESEN UND CONTROLLING

## 1. EINFÜHRUNG IN DAS RECHNUNGSWESEN UND CONTROLLING

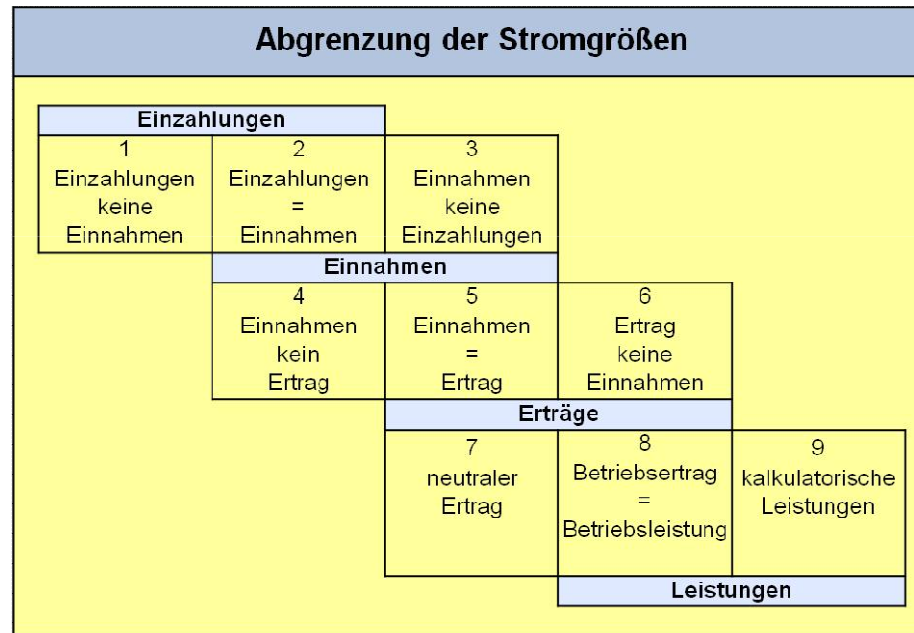

Seite 1031, Abb. 7: Abgrenzung der Stromgrößen

## **2. BILANZIERUNG UND JAHRESABSCHLUSS**

2.1 INVENTUR UND INVENTAR

2.2 DIE BILANZ

2.3 DIE BEWERTUNG DER BILANZ

2.4 DIE GEWINN- UND VERLUSTRECHNUNG

2.5 DER JAHRESABSCHLUSS

2.6 DIE STEUERPFlicht

2.7 ANALYSE UND BEURTEILUNG VON BILANZ UND GEWINN- UND VERLUSTRECHNUNG

2.8 EXKURS: DIE BUCHFÜHRUNG

**2.9 DIE EDV IM RECHNUNGSWESEN**

*Jung: Allgemeine Betriebswirtschaftslehre. De Gruyter Oldenbourg 2016. ISBN 978-3-486-76376-8*



# KAPITEL I: RECHNUNGSWESEN UND CONTROLLING

## 2. BILANZIERUNG UND JAHRESABSCHLUSS

| Inventar                                                               |           |                  |
|------------------------------------------------------------------------|-----------|------------------|
| der Firma Meestechnik Peter Kunze, Krefeld, für den 31. Dezember 20... |           |                  |
| Vermögen                                                               | EUR       | EUR              |
| <b>A) Anlagevermögen</b>                                               |           |                  |
| 1. Gebäude                                                             |           |                  |
| Werkstatt                                                              | 1.270.000 |                  |
| Bürogebäude                                                            | 443.000   |                  |
| Lager                                                                  | 660.000   | 2.403.000        |
| 2. Maschinen lt. Anlageverzeichnis (AV) 1                              |           | 1.395.000        |
| 3. Fuhrpark lt. AV 2                                                   |           | 355.000          |
| 4. Betriebsausstattung lt. AV 3                                        |           | 433.000          |
| <b>B) Umlaufvermögen</b>                                               |           |                  |
| 1. Rohmaterial lt. Inventurliste (IV) 4                                |           | 885.000          |
| 2. Hilfsstoffe lt. IV 5                                                |           | 445.000          |
| 3. Betriebsstoffe lt. IV 6                                             |           | 56.000           |
| 4. Unfertige Erzeugnisse lt. IV 7                                      |           | 138.000          |
| 5. Fertigerzeugnisse                                                   |           |                  |
| 48 Durchflussmesssonden à 1.420 EUR                                    | 68.160    |                  |
| 28 Feinmessgeräte à 3.581 EUR                                          | 92.588    |                  |
| Diverse Anzeigergeräte lt. IV 8                                        | 34.254    | 195.000          |
| 6. Forderungen an Kunden                                               |           |                  |
| Firma Schmitz Industrieanlagen                                         | 475.000   |                  |
| Firma Scherer Export & Import                                          | 963.000   | 978.000          |
| 7. Kassenbestand                                                       |           | 22.000           |
| 8. Bankguthaben                                                        |           |                  |
| Sparkasse Krefeld                                                      | 663.000   |                  |
| Postgiroamt Krefeld                                                    | 321.000   | 974.000          |
| <b>Summe des Vermögens</b>                                             |           | <b>8.279.000</b> |
| <b>Schulden</b>                                                        |           |                  |
| <b>A) Langfristige Schulden</b>                                        |           |                  |
| Hypothek der Sparkasse Krefeld                                         |           | 3.345.000        |
| <b>B) Kurzfristige Schulden</b>                                        |           |                  |
| Verbindlichkeiten an Lieferanten                                       |           |                  |
| W. Müller, Frankfurt a. M.                                             | 978.000   |                  |
| P. Schumacher, Düsseldorf                                              | 849.000   | 1.827.000        |
| <b>Summe der Schulden</b>                                              |           | <b>5.172.000</b> |
| <b>Eigenkapital</b>                                                    |           |                  |
| Summe des Vermögens                                                    |           | 8.279.000        |
| – Summe der Schulden                                                   |           | – 5.172.000      |
| <b>Eigenkapital</b>                                                    |           | <b>3.107.000</b> |

Seite 1034, Abb. 8: Darstellung eines Inventars



# KAPITEL I: RECHNUNGSWESEN UND CONTROLLING

## 2. BILANZIERUNG UND JAHRESABSCHLUSS

| Bilanz                   |           |                      |           |
|--------------------------|-----------|----------------------|-----------|
| Aktiva                   |           | Passiva              |           |
| zum 31. Dezember 20...   |           |                      |           |
| A) Anlagevermögen        |           | A) Eigenkapital      | 3.107.000 |
| 1. Gebäude               | 2.403.000 | B) Fremdkapital      |           |
| 2. Maschinen             | 1.395.000 | 1. Hypotheken        | 3.345.000 |
| 3. Fuhrpark              | 355.000   | 2. Verbindlichkeiten | 1.827.000 |
| 4. Betriebsausstattung   | 433.000   |                      |           |
| B) Umlaufvermögen        |           |                      |           |
| 1. Rohstoffe             | 885.000   |                      |           |
| 2. Hilfsstoffe           | 445.000   |                      |           |
| 3. Betriebsstoffe        | 56.000    |                      |           |
| 4. unfertige Erzeugnisse | 138.000   |                      |           |
| 5. Fertigerzeugnisse     | 195.000   |                      |           |
| 6. Kundenforderungen     | 978.000   |                      |           |
| 7. Kasse                 | 22.000    |                      |           |
| 8. Bank                  | 974.000   |                      |           |
|                          | 8.279.000 |                      | 8.279.000 |

Seite 1035, Abb. 9: Darstellung einer Bilanz

# KAPITEL I: RECHNUNGSWESEN UND CONTROLLING

## 2. BILANZIERUNG UND JAHRESABSCHLUSS

| Vermögensstruktur | EUR       | %   | Kapitalstruktur | EUR       | %   |
|-------------------|-----------|-----|-----------------|-----------|-----|
| Anlagevermögen    | 4.586.000 | 49  | Eigenkapital    | 3.107.000 | 55  |
| Umlaufvermögen    | 3.693.000 | 51  | Fremdkapital    | 5.172.000 | 45  |
| Gesamtvermögen    | 8.279.000 | 100 | Gesamtkapital   | 8.279.000 | 100 |

Seite 1036, Abb. 10: Darstellung der Bilanzstruktur

# KAPITEL I: RECHNUNGSWESEN UND CONTROLLING

## 2. BILANZIERUNG UND JAHRESABSCHLUSS

| Bilanzart                       | Anlass                                                  | Inhalt                                                                                                                                  | Aufgaben                                                                                                                 | Merkmale                                                                                                             |
|---------------------------------|---------------------------------------------------------|-----------------------------------------------------------------------------------------------------------------------------------------|--------------------------------------------------------------------------------------------------------------------------|----------------------------------------------------------------------------------------------------------------------|
| <b>Gründungs-<br/>bilanz</b>    | Gründung des Unternehmens                               | Aufstellung des bei der Gründung vorhandenen Vermögens und Kapitals                                                                     | Rechenschaftslegung über Gründungsvorgang, Ausgangsbilanz für die folgende Jahresbilanz                                  | Sonderbilanz aufgrund gesetzlicher Vorschriften                                                                      |
| <b>Handels-<br/>bilanz</b>      | Handelsrechtlicher Jahresabschluss nach §§ 242, 264 HGB | Gegenüberstellung von Vermögen und Kapital am Bilanzstichtag nach handelsrechtlichen Bilanzierungs- und Bewertungsvorschriften          | Rechenschaftslegung und Information für die Gesellschafter, Gläubiger, Belegschaft usw.                                  | Externe ordentliche Bilanzierung aufgrund gesetzlicher Verpflichtung                                                 |
| <b>Steuer-<br/>bilanz</b>       | Steuerlicher Jahresabschluss nach § 5 EStG              | Gegenüberstellung von Vermögen und Kapital am Bilanzstichtag nach steuerrechtlichen Bilanzierungs- und Bewertungsvorschriften           | Ermittlung des Periodengewinns durch Betriebsvermögensvergleich, korrigiert um Einlagen und Entnahmen nach §§ 4 - 7 EStG | Externe ordentliche Bilanzierung aufgrund gesetzlicher Verpflichtungen, Prinzip der Maßgeblichkeit der Handelsbilanz |
| <b>Konzern-<br/>bilanz</b>      | Jahresabschluss des Konzerns nach §§ 290 ff HGB         | Gegenüberstellung von Vermögen und Kapital aller zum Konsolidierungskreis gehörenden Unternehmen unter Ausschaltung von Doppelzählungen | Information über die Vermögens-, Finanz- und Ertragslage des Konzerns                                                    | Externe ordentliche Bilanz aufgrund gesetzlicher Verpflichtung                                                       |
| <b>Liquidations-<br/>bilanz</b> | Auflösung des Unternehmens                              | Gegenüberstellung von Vermögen und Kapital zu Liquidationswerten                                                                        | Ermittlung des Liquidationserlöses nach Regulierung der Schulden                                                         | Sonderbilanz, je nach Rechtsform geregelt                                                                            |

Seite 1037, Abb. 11: Ausgewählte Bilanzarten

(Vgl. Wöhe, G./ Kaiser, H./ Döring, U.: Übungsbuch zur Einführung in die Allgemeine Betriebswirtschaftslehre, 6. Aufl., München 1990, S. 387 ff.)

Jung: Allgemeine Betriebswirtschaftslehre. De Gruyter Oldenbourg 2016. ISBN 978-3-486-76376-8

# KAPITEL I: RECHNUNGSWESEN UND CONTROLLING

## 2. BILANZIERUNG UND JAHRESABSCHLUSS

| Aktiva                                                                                                               |  | zum ...                                                                                       |  |
|----------------------------------------------------------------------------------------------------------------------|--|-----------------------------------------------------------------------------------------------|--|
| Bilanz                                                                                                               |  | Passiva                                                                                       |  |
| <b>A. Anlagevermögen:</b>                                                                                            |  | <b>A. Eigenkapital:</b>                                                                       |  |
| <b>I. Immaterielle Vermögensgegenstände:</b>                                                                         |  | <b>I. Gezeichnetes Kapital</b>                                                                |  |
| 1. Konzessionen, gewerbliche Schutzrechte und ähnliche Rechte und Werte sowie Lizenzen an solchen Rechten und Werten |  | <b>II. Kapitalrücklage</b>                                                                    |  |
| 2. Geschäfts- oder Firmenwert                                                                                        |  | <b>III. Gewinnrücklagen:</b>                                                                  |  |
| 3. Gezielte Anzahlungen                                                                                              |  | 1. Gesetzliche Rücklage                                                                       |  |
| <b>II. Sachanlagen:</b>                                                                                              |  | 2. Rücklage für eigene Anteile                                                                |  |
| 1. Grundstücke, grundstücksgleiche Rechte und Bauten einschließlich der Bauten auf fremden Grundstücken              |  | 3. Satzungsähnliche Rücklagen                                                                 |  |
| 2. Technische Anlagen und Maschinen                                                                                  |  | 4. Andere Gewinnrücklagen                                                                     |  |
| 3. Andere Anlagen, Betriebs- und Geschäftsausstattung                                                                |  | <b>IV. Gewinnvortrag/Verlustvortrag</b>                                                       |  |
| 4. Gezielte Anzahlungen und Anlagen im Bau                                                                           |  | <b>V. Jahresüberschuss/Jahresfehlbetrag</b>                                                   |  |
| <b>III. Finanzanlagen:</b>                                                                                           |  | <b>B. Rückstellungen:</b>                                                                     |  |
| 1. Anteile an verbundenen Unternehmen                                                                                |  | 1. Rückstellungen für Pensionen und ähnliche Verpflichtungen                                  |  |
| 2. Ausleihungen an verbundene Unternehmen                                                                            |  | 2. Steuerrückstellungen                                                                       |  |
| 3. Beteiligungen                                                                                                     |  | 3. Sonstige Rückstellungen                                                                    |  |
| 4. Ausleihungen an Unternehmen, mit denen ein Beteiligungsverhältnis besteht                                         |  | <b>C. Verbindlichkeiten:</b>                                                                  |  |
| 5. Wertpapiere des Anlagevermögens                                                                                   |  | 1. Anleihen, davon konvertibel                                                                |  |
| 6. Sonstige Ausleihungen                                                                                             |  | 2. Verbindlichkeiten gegenüber Kreditinstituten                                               |  |
| <b>B. Umlaufvermögen:</b>                                                                                            |  | 3. Pensionsansparungen auf Rückstellungen                                                     |  |
| <b>I. Vorräte:</b>                                                                                                   |  | 4. Verbindlichkeiten aus Lieferungen und Leistungen                                           |  |
| 1. Roh-, Hilfs- und Betriebsstoffe                                                                                   |  | 5. Verbindlichkeiten aus der Annahme gezogener Wechsel und der Ausstellung eigener Wechsel    |  |
| 2. Unfertige Erzeugnisse, unfertige Leistungen                                                                       |  | 6. Verbindlichkeiten gegenüber verbundenen Unternehmen                                        |  |
| 3. Fertige Erzeugnisse und Waren                                                                                     |  | 7. Verbindlichkeiten gegenüber Unternehmen, mit denen ein Beteiligungsverhältnis besteht      |  |
| 4. Gezielte Anzahlungen                                                                                              |  | 8. Sonstige Verbindlichkeiten, - davon aus Steuern, - davon im Rahmen der sozialen Sicherheit |  |
| <b>II. Forderungen und sonstige Vermögensgegenstände:</b>                                                            |  | <b>D. Rechnungsabgrenzungsposten</b>                                                          |  |
| 1. Forderungen aus Lieferungen u. Leistungen                                                                         |  |                                                                                               |  |
| 2. Forderungen gegen verbundene Unternehmen                                                                          |  |                                                                                               |  |
| 3. Forderungen gegen Unternehmen, mit denen ein Beteiligungsverhältnis besteht                                       |  |                                                                                               |  |
| 4. Sonstige Vermögensgegenstände                                                                                     |  |                                                                                               |  |
| <b>III. Wertpapiere:</b>                                                                                             |  |                                                                                               |  |
| 1. Anteile an verbundenen Unternehmen                                                                                |  |                                                                                               |  |
| 2. Eigene Anteile                                                                                                    |  |                                                                                               |  |
| 3. Sonstige Wertpapiere                                                                                              |  |                                                                                               |  |
| <b>IV. Schecks, Kassenbestand, Bundesbank- und Postguthaben, Guthaben bei Kreditinstituten</b>                       |  |                                                                                               |  |
| <b>C. Rechnungsabgrenzungsposten</b>                                                                                 |  |                                                                                               |  |

Seite 1039, Abb. 12: Gliederung der Bilanz der Kapitalgesellschaften

# KAPITEL I: RECHNUNGSWESEN UND CONTROLLING

## 2. BILANZIERUNG UND JAHRESABSCHLUSS

| Geschäftsvorfall            | Vorgang im |          | Bilanzposten                |
|-----------------------------|------------|----------|-----------------------------|
|                             | alten WJ   | neuen WJ |                             |
| Im Voraus bezahlter Aufwand | Ausgabe    | Aufwand  | Aktive Rechnungsabgrenzung  |
| Im Voraus erhaltener Ertrag | Einnahme   | Ertrag   | Passive Rechnungsabgrenzung |
| Noch zu zahlender Aufwand   | Aufwand    | Ausgabe  | Verbindlichkeiten           |
| Noch zu erhaltener Ertrag   | Ertrag     | Einnahme | Forderungen                 |

Seite 1040, Abb. 13: Periodengerechte Abgrenzung (WJ = Wirtschaftsjahr)

# KAPITEL I: RECHNUNGSWESEN UND CONTROLLING

## 2. BILANZIERUNG UND JAHRESABSCHLUSS

| Anlagenkarte                 |                           |                        |
|------------------------------|---------------------------|------------------------|
| Anlagen-Nummer               | A. III. 6. 6543           |                        |
| Anlagengruppe                | Geschäftsausstattung      |                        |
| Vermögensgegenstand          | Kopiergerät               |                        |
| Hersteller/Lieferant         | AB Copy GmbH              |                        |
| Standort                     | Kopierstelle im Gebäude 6 |                        |
| Angeschafft am               | 23.01.2016                |                        |
| Anschaffungskosten           | 20.000 EUR                |                        |
| Nutzungsdauer                | 5 Jahre                   |                        |
| Abschreibungsverfahren       | linear                    |                        |
| Abschreibungsbetrag p.a.     | 4.000 EUR                 |                        |
| Anschaffungskosten           | 20.000 EUR                | Kumulativer AfA-Betrag |
| - AfA-Betrag 2015            | - 4.000 EUR               | 4.000 EUR              |
| = Restbuchwert am 31.12.2015 | 16.000 EUR                |                        |
| - AfA-Betrag 2016            | - 4.000 EUR               | 8.000 EUR              |
| = Restbuchwert am 31.12.2016 | -12.000 EUR               |                        |
| usw.                         | usw.                      | usw.                   |

Seite 1045, Abb. 14: Beispiel Anlagenkarte

# KAPITEL I: RECHNUNGSWESEN UND CONTROLLING

## 2. BILANZIERUNG UND JAHRESABSCHLUSS

| Nr.        | Anlagegut                                                | ND | ATA | Nr.          | Anlagegut                                       | ND        | ATA       |
|------------|----------------------------------------------------------|----|-----|--------------|-------------------------------------------------|-----------|-----------|
| <b>1.</b>  | <b>Unbewegliches Anlagevermögen</b>                      |    |     | <b>3.3.3</b> | <b>Materialprüfgeräte</b>                       | <b>10</b> | <b>10</b> |
| 1.1        | Bauwerke in Leichtbauweise                               | 14 | 7   | 3.4          | Transportanlagen                                |           |           |
| 1.2        | Festhallen, Sporthallen                                  | 20 | 5   | 3.4.1        | Transportbänder u. d.                           | 14        | 7         |
| 1.3        | Tragflächen                                              | 10 | 10  | 3.4.2        | Behälterkörper u. Umladegeräte                  |           |           |
| 1.4        | Kühnhäfen                                                | 20 | 5   |              |                                                 |           |           |
| 1.5        | Lager- und Schuppen                                      | 16 | 8   | 3.4.2.1      | - nach Bundesbahnbv.                            | 33        | 3         |
| 1.6        | Gebäude                                                  | 6  | 12  | 3.4.2.2      | - sonstige                                      | 15        | 7         |
| 1.7        | Küchen                                                   | 8  | 12  | 3.4.3        | Kontrollanlagen                                 |           |           |
| 1.8        | Pumpen, Turbinen, Tiefdruckmaschinen und Schaltkasten    | 20 | 5   | 3.4.3.1      | - stehend u. auf Schienen                       | 21        | 5         |
| 1.9        | Straßen                                                  |    |     | 3.4.3.2      | - sonstige                                      | 14        | 7         |
| 1.9.1      | - aus Beton                                              | 33 | 3   | 3.4.4        | Aufzüge u. Hubbahnen                            |           |           |
| 1.9.2      | - aus Stahl                                              | 25 | 4   | 3.4.4.1      | - stehend                                       | 15        | 7         |
|            |                                                          |    |     | 3.4.4.2      | - mobil                                         | 11        | 9         |
| 1.10       | Schienenbahn                                             |    |     | <b>4</b>     | <b>Fahrzeuge</b>                                |           |           |
| 1.10.1     | - aus Mauerwerk oder Beton                               | 33 | 3   | 4.1          | Schienenfahrzeuge                               | 25        | 4         |
| 1.10.2     | - aus Metall                                             | 10 | 10  | 4.2          | Straßenfahrzeuge                                |           |           |
| <b>2.</b>  | <b>Grundstückseinrichtungen</b>                          |    |     | 4.2.1        | Personenkraftwagen und Kombiwagen               | 6         | 17        |
| 2.1        | Fahrbahnen, Parkplätze und Hofbelagungen                 |    |     | 4.2.2        | Motorräder, Motorroller                         | 7         | 14        |
| 2.1.1      | - mit Packlage                                           | 19 | 5   | 4.2.3        | Lastkraftwagen u. d.                            | 9         | 12        |
| 2.1.2      | - in Kies, Schotter, Schotter                            | 9  | 11  | 4.2.4        | Traktoren und Schlepper                         | 12        | 9         |
| 2.2        | Straßen- und Wegebauwerke                                |    |     | 4.2.5        | Krananlagen                                     | 8         | 12        |
| 2.2.1      | - aus Stahl und Beton                                    | 33 | 3   | 4.2.6        | Anhänger, Auflieger                             | 11        | 9         |
| 2.2.2      | - aus Holz                                               | 15 | 7   | 4.2.7        | Omnibusse                                       | 9         | 12        |
| 2.3        | Umzäunungen Außenbau                                     |    |     | 4.2.8        | Sonderfahrzeuge                                 |           |           |
| - aus Holz | 5                                                        | 20 |     | 4.2.8.1      | Feuerwehrfahrzeuge                              | 10        | 10        |
| - sonstige | 5                                                        | 20 |     | 4.2.8.2      | Reklamefahrzeuge und Krankentransportfahrzeuge  | 6         | 17        |
| 2.4        | Außenbeleuchtung                                         | 15 | 7   | 4.2.9        | Wohnmobile, -wagen                              | 8         | 12        |
| 2.5        | Ölheizungsanlagen                                        | 10 | 10  | 4.2.10       | Beleuchtungen                                   | 12        | 9         |
| 2.6        | Überholanlagen                                           | 20 | 5   | 4.3          | Luftfahrzeuge                                   |           |           |
| 2.7        | Br., Erdbebenversicherungsanlagen und Kläranlagen        |    |     | 4.3.1        | Flugzeuge unter 20 t                            | 21        | 5         |
| 2.7.1      | Rinnen                                                   | 20 | 5   | 4.3.2        | Helikopter                                      | 10        | 6         |
| 2.7.2      | Umanlagen                                                |    |     | <b>5.</b>    | <b>Maschinen der Stoffver- und -bearbeitung</b> |           |           |
| 2.7.2.1    | - aus Beton oder Mauerwerk                               | 33 | 3   | 5.1          | Abbruchmaschinen                                | 13        | 8         |
| 2.7.2.2    | - aus Ton oder Kunststoff                                | 13 | 8   | 5.2          | Biegemaschinen                                  | 13        | 8         |
| 2.8        | Krananlagen                                              | 20 | 5   | 5.3          | Drehmaschinen                                   |           |           |
| <b>3.</b>  | <b>Betriebsanlagen allgemeiner Art</b>                   |    |     | 5.3.1        | natürlich                                       | 16        | 6         |
| 3.1        | Krafterzeugungsanlagen                                   |    |     | 5.3.2        | mob.                                            | 6         | 13        |
| 3.1.1      | Dampf- und Gasanlagen (Rumpfkessel mit Zylinder)         | 15 | 7   | 5.4          | Bolzenmaschinen                                 | 7         | 14        |
| 3.1.2      | Stromerzeugungsanlagen (Generatoren, Stromumformer usw.) |    |     | <b>6.</b>    | <b>Betriebs- und Geschäftsausstattung</b>       |           |           |
| 3.2        | Kälteanlagen                                             | 19 | 5   | 6.1          | Wirtschaftsgüter der Lageranlagen               | 14        |           |
| 3.3        | Mess- und Regelanlagen                                   | 10 | 10  | 6.2          | Wirtschaftsgüter der Lageranlagen               | 8         |           |
| 3.3.1      | - allgemein                                              | 18 | 5   | 6.3          | Messstände                                      | 6         |           |
| 3.3.2      | - für Messgeräte                                         | 8  | 13  | 6.4          | Kühlanlagen                                     | 8         |           |

Seite 1046, Abb. 15: Afa-Tabell AV (Auszug)

(Vgl. Bundesministerium der Finanzen. Abschreibungstabelle Betriebsgewöhnliche Nutzungsdauer §7 Absatz1 Satz 2 EStG für allgemein verwendbare Anlagegüter, Stand Dezember 2015)

Jung: Allgemeine Betriebswirtschaftslehre. De Gruyter Oldenbourg 2016. ISBN 978-3-486-76376-8

# KAPITEL I: RECHNUNGSWESEN UND CONTROLLING

## 2. BILANZIERUNG UND JAHRESABSCHLUSS

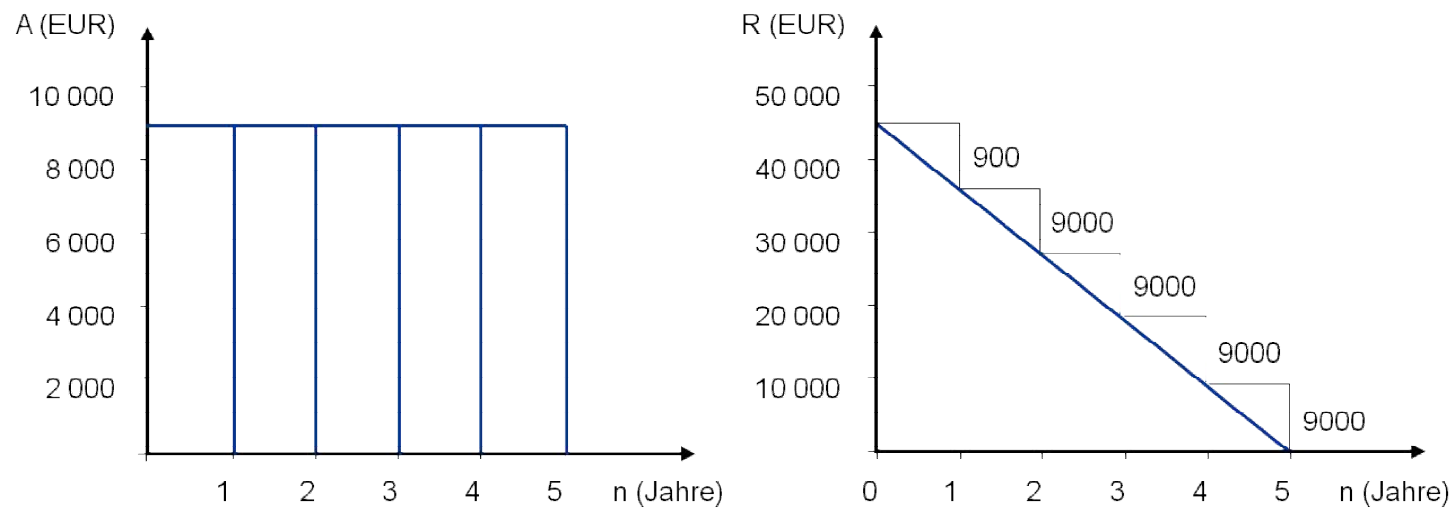

Seite 1047, Abb. 16: Darstellung des linearen Abschreibungsverlaufes



# KAPITEL I: RECHNUNGSWESEN UND CONTROLLING

## 2. BILANZIERUNG UND JAHRESABSCHLUSS

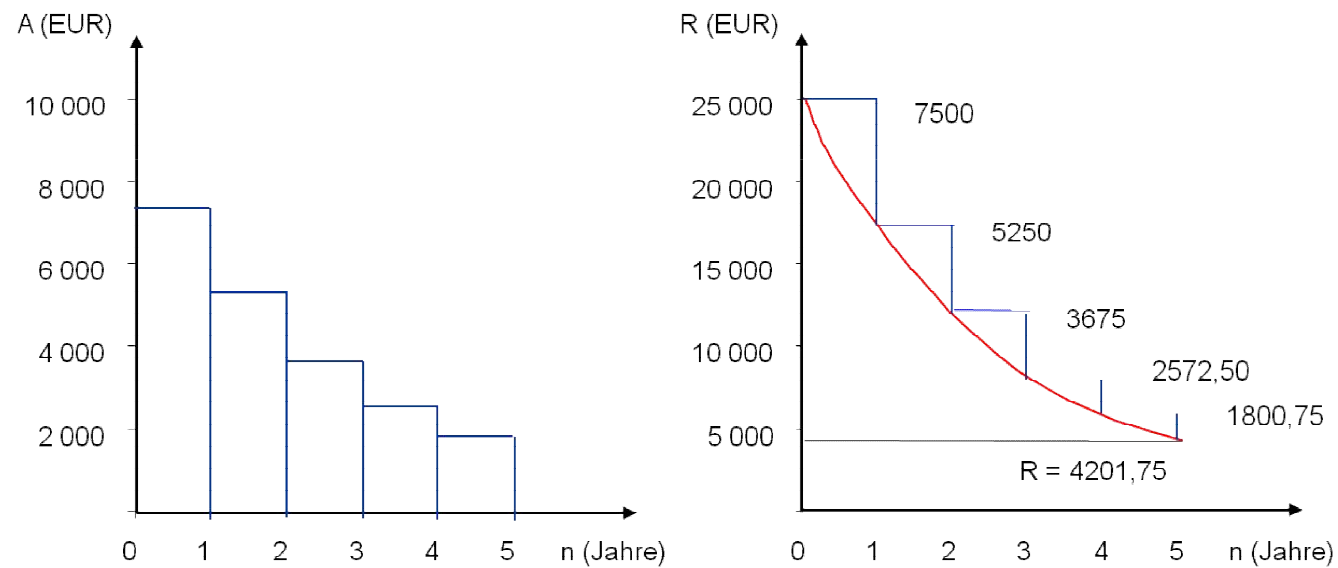

Seite 1048, Abb. 17: Darstellung des geometrisch-degressiven Abschreibungsverlaufes

# KAPITEL I: RECHNUNGSWESEN UND CONTROLLING

## 2. BILANZIERUNG UND JAHRESABSCHLUSS

|                    | Lineare AfA<br>10 % | Degressive AfA<br>20 % | Wechsel<br>degressiv linear      |
|--------------------|---------------------|------------------------|----------------------------------|
| Anschaffungskosten | 10.000              | 10.000,00              | -                                |
| AfA 1. Jahr        | 1.000               | 2.000,00               | -                                |
| Restbuchwert       | 9.000               | 8.000,00               | 8.000                            |
| AfA 2. Jahr        | 1.000               | 1.600,00               | $8.000 : 9 = 888,89$             |
| Restbuchwert       | 8.000               | 6.400,00               | 6.400                            |
| AfA 3. Jahr        | 1.000               | 1.280,00               | $6.400 : 8 = 800$                |
| Restbuchwert       | 7.000               | 5.120,00               | 5.120                            |
| AfA 4. Jahr        | 1.000               | 1.024,00               | $5.102 : 7 = 731,43$             |
| Restbuchwert       | 6.000               | 4.096,00               | 4.096                            |
| AfA 5. Jahr        | 1.000               | 819,20                 | $4.096 : 6 = 682,67$             |
| Restbuchwert       | 5.000               | 3.276,80               | 3.276,80                         |
| AfA 6. Jahr        | 1.000               | <b>655,36</b>          | $3.276,80 : 5 = \mathbf{655,36}$ |
| Restbuchwert       | 4.000               | 2.621,44               | 2.621,44                         |
| AfA 7. Jahr        | 1.000               | 524,29                 | 655,36                           |
| Restbuchwert       | 3.000               | 2.097,15               | 1.966,08                         |
| AfA 8. Jahr        | 1.000               | 419,43                 | 655,36                           |
| Restbuchwert       | 2.000               | 1.677,72               | 1.310,72                         |
| AfA 9. Jahr        | 1.000               | 335,54                 | 655,36                           |
| Restbuchwert       | 1.000               | 1.342,18               | 655,36                           |
| AfA 10. Jahr       | 1.000               | 268,44                 | 655,36                           |
| Restbuchwert       | 0                   | 1.073,74               | 0                                |

Seite 1050, Abb. 18: Gegenüberstellung linearer zur degressiven Abschreibung

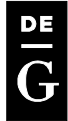

# KAPITEL I: RECHNUNGSWESEN UND CONTROLLING

## 2. BILANZIERUNG UND JAHRESABSCHLUSS

| Gewinn- und Verlustrechnung (GuV)                                                                                                                                      |                                                                                                                   |
|------------------------------------------------------------------------------------------------------------------------------------------------------------------------|-------------------------------------------------------------------------------------------------------------------|
| Gesamtkostenverfahren:                                                                                                                                                 | Umsatzkostenverfahren:                                                                                            |
| 1. Umsatzerlöse                                                                                                                                                        | 1. Umsatzerlöse                                                                                                   |
| 2. Erhöhung oder Verminderung des Bestandes an fertigen und unfertigen Erzeugnissen                                                                                    | 2. Herstellungskosten der zur Erzielung der Umsatzerlöse erbrachten Leistungen                                    |
| 3. Andere aktivierte Eigenleistungen                                                                                                                                   | 3. Bruttoergebnis vom Umsatz                                                                                      |
| 4. Sonstige betriebliche Erträge                                                                                                                                       | 4. Vertriebskosten                                                                                                |
| 5. Materialaufwand:                                                                                                                                                    | 5. Allgemeine Vertriebskosten                                                                                     |
| a) Aufwendungen für Roh-, Hilfs- und Betriebsstoffe und bezogene Waren                                                                                                 | 6. Sonstige betriebliche Erträge                                                                                  |
| b) Aufwendungen für bezogene Leistungen                                                                                                                                |                                                                                                                   |
| 6. Personalaufwand:                                                                                                                                                    |                                                                                                                   |
| a) Löhne und Gehälter                                                                                                                                                  |                                                                                                                   |
| b) Soziale Abgaben und Aufwendungen für Altersversorgung und Unterstützung, davon für Altersversorgung                                                                 |                                                                                                                   |
| 7. Abschreibungen:                                                                                                                                                     |                                                                                                                   |
| a) auf immaterielle Vermögensgegenstände des Anlagevermögens und Sachanlagen sowie auf aktivierte Aufwendungen für Inangestaltung und Erwerbung des Geschäftsbetriebes |                                                                                                                   |
| b) auf Vermögensgegenstände des Umlaufvermögens, soweit diese die in der Kapitalgesellschaft üblichen Abschreibungen überschreiten                                     |                                                                                                                   |
| 8. Sonstige betriebliche Aufwendungen                                                                                                                                  | 7. Sonstige betriebliche Aufwendungen                                                                             |
| 9. Erträge aus Beteiligungen, davon aus verbundenen Unternehmen                                                                                                        | 8. Erträge aus Beteiligungen, davon aus verbundenen Unternehmen                                                   |
| 10. Erträge aus anderen Wertpapieren und Ausleihungen des Finanzanlagevermögens, davon aus verbundenen Unternehmen                                                     | 9. Erträge aus anderen Wertpapieren und Ausleihungen des Finanzanlagevermögens, davon aus verbundenen Unternehmen |
| 11. Sonstige Zinsen und ähnliche Erträge, davon aus verbundenen Unternehmen                                                                                            | 10. Sonstige Zinsen und ähnliche Erträge, davon aus verbundenen Unternehmen                                       |
| 12. Abschreibungen auf Finanzanlagen und Wertpapiere des Umlaufvermögens                                                                                               | 11. Abschreibungen auf Finanzanlagen und Wertpapiere des Umlaufvermögens                                          |
| 13. Zinsen und ähnliche Aufwendungen, davon aus verbundenen Unternehmen                                                                                                | 12. Zinsen und ähnliche Aufwendungen, davon aus verbundenen Unternehmen                                           |
| 14. Ergebnis der gewöhnlichen Geschäftstätigkeit                                                                                                                       | 13. Ergebnis der gewöhnlichen Geschäftstätigkeit                                                                  |
| 15. Außerordentliche Erträge                                                                                                                                           | 14. Außerordentliche Erträge                                                                                      |
| 16. Außerordentliche Aufwendungen                                                                                                                                      | 15. Außerordentliche Aufwendungen                                                                                 |
| 17. Außerordentliches Ergebnis                                                                                                                                         | 16. Außerordentliches Ergebnis                                                                                    |
| 18. Steuern vom Einkommen und Ertrag                                                                                                                                   | 17. Steuern vom Einkommen und Ertrag                                                                              |
| 19. Sonstige Steuern                                                                                                                                                   | 18. Sonstige Steuern                                                                                              |
| 20. Jahresüberschuss/Jahresfehlbetrag                                                                                                                                  | 19. Jahresüberschuss/Jahresfehlbetrag                                                                             |

Seite 1059, Abb. 19: Gewinn- und Verlustrechnung

# KAPITEL I: RECHNUNGSWESEN UND CONTROLLING

## 2. BILANZIERUNG UND JAHRESABSCHLUSS

| Gewinn- und Verlustrechnung                                                                                                        |                      |
|------------------------------------------------------------------------------------------------------------------------------------|----------------------|
| zum 31.12.20... der Firma Maschinen GmbH, München                                                                                  |                      |
| 1. Umsatzerlöse                                                                                                                    | 1.200.000 EUR        |
| 2. Erhöhung oder Verminderung des Bestandes an fertigen und unfertigen Erzeugnissen                                                | + 80.000 EUR         |
| 3. Andere aktivierte Eigenleistungen                                                                                               | + 50.000 EUR         |
| 4. Sonstige betriebliche Erträge                                                                                                   | + 4.000 EUR          |
| 5. Materialaufwand:                                                                                                                |                      |
| a) Aufwendungen für Roh-, Hilfs-, Betriebsstoffe und bezogene Waren                                                                | - 432.000 EUR        |
| b) Aufwendungen für bezogene Leistungen                                                                                            | - 46.000 EUR         |
| <b>Rohergebnis</b>                                                                                                                 | <b>= 856.000 EUR</b> |
| 6. Personalaufwand:                                                                                                                |                      |
| a) Löhne und Gehälter                                                                                                              | - 470.000 EUR        |
| b) Soziale Abgaben und Aufwendungen für Altersversorgung und Unterstützung, davon für Altersversorgung: 110.000 EUR                | - 220.000 EUR        |
| 7. Abschreibungen:                                                                                                                 |                      |
| a) an immaterielle Vermögensgegenstände des Anlagevermögens und Sachanlagen                                                        | - 87.000 EUR         |
| b) auf Vermögensgegenstände des Umlaufvermögens, soweit diese die in der Kapitalgesellschaft üblichen Abschreibungen überschreiten | - 6.000 EUR          |
| 8. Sonstige betriebliche Aufwendungen                                                                                              | - 20.000 EUR         |
| <b>Betriebsergebnis</b>                                                                                                            | <b>= 84.000 EUR</b>  |
| 9. Erträge aus Beteiligungen, davon aus verbundenen Unternehmen                                                                    | + 600 EUR            |
| 10. Erträge aus anderen Wertpapieren und Ausleihungen des Finanzanlagevermögens, davon aus verbundenen Unternehmen                 | + 400 EUR            |
| 11. Sonstige Zinsen und ähnliche Erträge, davon aus verbundenen Unternehmen                                                        | + 200 EUR            |
| 12. Abschreibungen auf Finanzanlagen und Wertpapiere des Umlaufvermögens                                                           | - 2.000 EUR          |
| 13. Zinsen und ähnliche Aufwendungen, davon aus verbundenen Unternehmen                                                            | - 21.000 EUR         |
| <b>Finanzergebnis</b>                                                                                                              | <b>= 21.800 EUR</b>  |
| 14. <b>Ergebnis der gewöhnlichen Geschäftstätigkeit</b>                                                                            | <b>= 62.200 EUR</b>  |
| 15. Außerordentliche Erträge                                                                                                       | 10.000 EUR           |
| 16. Außerordentliche Aufwendungen                                                                                                  | 14.000 EUR           |
| 17. <b>Außerordentliches Ergebnis</b>                                                                                              | <b>= 4.000 EUR</b>   |
| 18. Steuern vom Einkommen und Ertrag                                                                                               | - 30.000 EUR         |
| 19. Sonstige Steuern                                                                                                               | - 4.200 EUR          |
| 20. <b>Jahresüberschuss/Jahresfehlbetrag</b>                                                                                       | <b>= 24.000 EUR</b>  |

Seite 1061, Abb. 20: Beispiel einer Gewinn- und Verlustrechnung

# KAPITEL I: RECHNUNGSWESEN UND CONTROLLING

## 2. BILANZIERUNG UND JAHRESABSCHLUSS

| Merkmale                             | Kleinst--<br>unternehmen | Kleine Kapital-<br>gesellschaften | Mittelgroße Kapi-<br>talgesellschaften | Große Kapital-<br>gesellschaften |
|--------------------------------------|--------------------------|-----------------------------------|----------------------------------------|----------------------------------|
| Bilanzsumme<br>(EUR)                 | bis 350.000              | bis 6.000.000                     | bis 20.000.000                         | über 20.000.000                  |
| Umsatz<br>(EUR)                      | bis 700.000              | bis 12.000.000                    | bis 40.000.000                         | über 40.000.000                  |
| Mitarbeiter im<br>Jahresdurchschnitt | bis 10                   | bis 50                            | bis 250                                | über 250                         |

Seite 1064, Abb. 21: Größenklassen zur Einstufung der Unternehmen nach § 267 Abs. 1 und § 267 a HGB

# KAPITEL I: RECHNUNGSWESEN UND CONTROLLING

## 2. BILANZIERUNG UND JAHRESABSCHLUSS

| Kapital-<br>gesellschaft                                              | kleine                                                                                         | mittlere                                        | große                                                    |
|-----------------------------------------------------------------------|------------------------------------------------------------------------------------------------|-------------------------------------------------|----------------------------------------------------------|
| Bestandteile der<br>Rechenschafts-<br>legung                          | Jahresabschluss mit:<br>Bilanz, Gewinn- und Verlustrechnung, Anhang,<br>zusätzlich Lagebericht |                                                 |                                                          |
| Aufstellungsfrist                                                     | 6 Monate                                                                                       | 3 Monate                                        | 3 Monate                                                 |
| Bilanzfeststellung                                                    | 11 Monate (GmbH)<br>8 Monate (AG)                                                              | 8 Monate                                        | 8 Monate                                                 |
| Prüfungspflicht                                                       | nein                                                                                           | ja                                              | ja                                                       |
| Ort der Offen-<br>legung                                              | Bundesanzeiger                                                                                 | Bundesanzeiger                                  | Bundesanzeiger                                           |
| Umfang der<br>Offen-legung:<br>Bilanz<br>G+V<br>Anhang<br>Lagebericht | verkürzt<br>nicht erforderlich<br>verkürzt<br>nicht erforderlich                               | verkürzt<br>verkürzt<br>verkürzt<br>vollständig | vollständig<br>vollständig<br>vollständig<br>vollständig |
| Offenlegungsfrist                                                     | 12 Monate                                                                                      | 9 Monate                                        | 9 Monate                                                 |

Seite 1065, Abb. 22: Pflichten der Rechenschaftslegung

# KAPITEL I: RECHNUNGSWESEN UND CONTROLLING

## 2. BILANZIERUNG UND JAHRESABSCHLUSS

| Nach Artikel 106 des Grundgesetzes stehen zu                                                                                                                                             |                                                                                                                                                                                                                                                                                                                                                                                                                                                     |                                                                                                                                                                                                                                                                     |                                                                                                                                                                                                                                                                                                                                                                                                           |
|------------------------------------------------------------------------------------------------------------------------------------------------------------------------------------------|-----------------------------------------------------------------------------------------------------------------------------------------------------------------------------------------------------------------------------------------------------------------------------------------------------------------------------------------------------------------------------------------------------------------------------------------------------|---------------------------------------------------------------------------------------------------------------------------------------------------------------------------------------------------------------------------------------------------------------------|-----------------------------------------------------------------------------------------------------------------------------------------------------------------------------------------------------------------------------------------------------------------------------------------------------------------------------------------------------------------------------------------------------------|
| Bund und Ländern<br>gemeinsam                                                                                                                                                            | dem Bund                                                                                                                                                                                                                                                                                                                                                                                                                                            | den Ländern                                                                                                                                                                                                                                                         | den Gemeinden                                                                                                                                                                                                                                                                                                                                                                                             |
| <b>Gemeinschaftssteuern:</b><br>Lohnsteuer<br>Einkommensteuer<br>Abgeltungssteuer auf<br>Zins- und Veräußerungs-<br>erträge<br>Körperschaftsteuer<br>Umsatzsteuer<br>Einfuhrumsatzsteuer | <b>Bundessteuern:</b><br>Zölle, Kapitalverkehr-,<br>Versicherung-, Wechsel-<br>und Verbrauchsteuern<br>mit Ausnahme der Bier-<br>steuer, Energiesteuer,<br>Stromsteuer, Tabaks-<br>teuer, Solidaritätszu-<br>schlag, Abgaben im<br>Rahmen der EU<br>Kraftfahrzeugsteuer,<br><br><b>Anteil an den Gemein-<br/>           schaftsteuern</b><br><br><b>Anteil an der Gewerbe-<br/>           steuerumlage: 50 %<br/>           Gewerbesteuerumlage</b> | <b>Ländersteuern:</b><br>Erbschaft-, Grund-<br>erwerb-, Bier- und<br>Feuerschutzabgabe,<br>Rennwett- und<br>Lotteriesteuer,<br><br><b>Anteil an den Gemein-<br/>           schaftsteuern</b><br><br><b>Anteil an der Gewerbe-<br/>           steuerumlage: 50 %</b> | <b>Gemeindesteuern:</b><br>Gewerbesteuer<br>Grundsteuer<br>Örtliche Verbrauch- und<br>Aufwandsteuer (z.B.<br>Hunde-, Vergnügungs-<br>steuer)<br><br><b>Anteil am Aufkommen<br/>           der Lohnsteuer<br/>           einschließlich der veran-<br/>           lagten Einkommens-<br/>           teuer: 15 %</b><br><br><b>Steuerzuweisungen<br/>           durch<br/>           Landesgesetzgebung</b> |

Seite 1066, Abb. 23: Ertragskompetenz

# KAPITEL I: RECHNUNGSWESEN UND CONTROLLING

## 2. BILANZIERUNG UND JAHRESABSCHLUSS

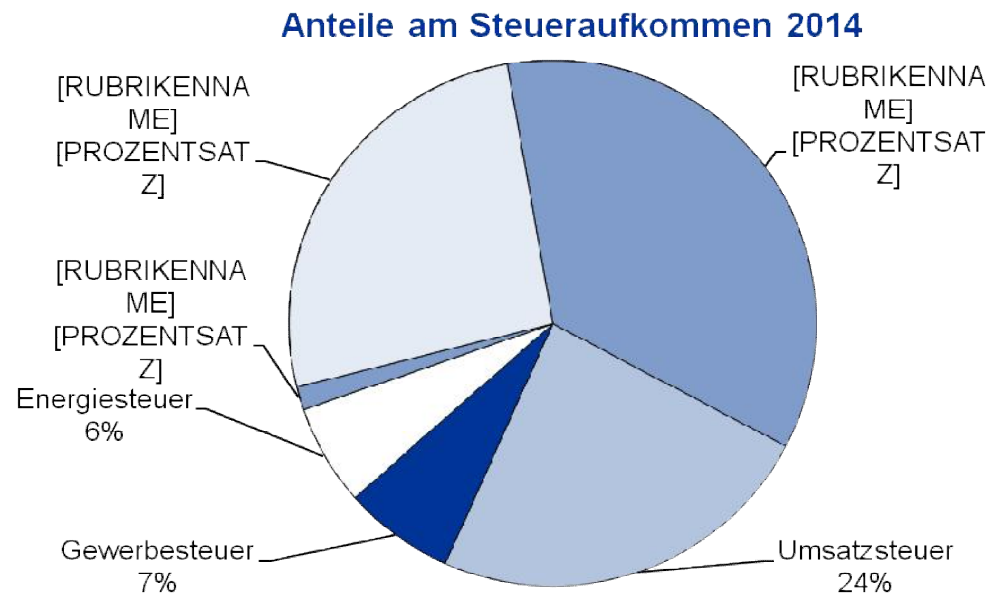

Seite 1067, Abb. 24: Anteile am Steueraufkommen 2014 in % des Gesamtsteueraufkommens  
(Vgl. Statistisches Bundesamt, Statistisches Jahrbuch 2015, Kapitel 9: Finanzen und Steuern, S. 267.)



# KAPITEL I: RECHNUNGSWESEN UND CONTROLLING

## 2. BILANZIERUNG UND JAHRESABSCHLUSS

| Vermögen          |                 | Bilanzstruktur                           | Kapital |
|-------------------|-----------------|------------------------------------------|---------|
| Anlagevermögen:   | Sachanlagen     | Eigenkapital                             |         |
|                   | Finanzanlagen   |                                          |         |
| Umlaufvermögen:   | Vorräte         |                                          |         |
|                   | Forderungen     |                                          |         |
|                   | flüssige Mittel |                                          |         |
| Bilanzsumme 100 % |                 | Bilanzsumme 100 %                        |         |
|                   |                 | Fremdkapital: langfristig<br>kurzfristig |         |

Seite 1070, Abb. 25: Schema der Bilanzstruktur

# KAPITEL I: RECHNUNGSWESEN UND CONTROLLING

## 2. BILANZIERUNG UND JAHRESABSCHLUSS

| <b>Vermögen (Aktiva)</b>       | <b>Alle Unt.</b> | <b>VG</b>     | <b>BG</b>     | <b>GH</b>     | <b>EH</b>     |
|--------------------------------|------------------|---------------|---------------|---------------|---------------|
| <b>Anlagevermögen:</b>         |                  |               |               |               |               |
| Immat. Vermögensgegenstände    | 2,1 %            | 1,7 %         | 0,3 %         | 1,5 %         | 1,6 %         |
| Sachanlagen                    | 23,2 %           | 17,3 %        | 17,5 %        | 12,4 %        | 23,8 %        |
| Beteiligungen                  | 15,5 %           | 21,5 %        | 2,2 %         | 6,3 %         | 5,6 %         |
| <b>Gesamt</b>                  | <b>40,8 %</b>    | <b>40,5 %</b> | <b>20,0 %</b> | <b>20,2 %</b> | <b>31,0 %</b> |
| <b>Umlaufvermögen:</b>         |                  |               |               |               |               |
| Vorräte                        | 16,8 %           | 18,8 %        | 43,3 %        | 25,5 %        | 30,1 %        |
| Forderungen                    | 33,5 %           | 31,7 %        | 26,7 %        | 46,0 %        | 26,8 %        |
| Wertpapiere                    | 2,1 %            | 2,8 %         | 0,4 %         | 0,5 %         | 0,9 %         |
| Kasse und Bankguthaben         | 6,8 %            | 6,2 %         | 9,6 %         | 7,8 %         | 11,2 %        |
| <b>Gesamt</b>                  | <b>59,2 %</b>    | <b>59,5 %</b> | <b>80,0 %</b> | <b>79,8 %</b> | <b>69,0 %</b> |
| <b>Bilanzsumme</b>             | <b>100 %</b>     | <b>100 %</b>  | <b>100 %</b>  | <b>100 %</b>  | <b>100 %</b>  |
|                                |                  |               |               |               |               |
| <b>Kapital (Passiva)</b>       | <b>Alle Unt.</b> | <b>VG</b>     | <b>BG</b>     | <b>GH</b>     | <b>EH</b>     |
| <b>Eigenkapital:</b>           |                  |               |               |               |               |
| Kapital (Eigenmittel)          | 28,0 %           | 31,1 %        | 14,3 %        | 29,7 %        | 22,1 %        |
| <b>Fremdkapital:</b>           |                  |               |               |               |               |
| Rückstellungen                 | 16,2 %           | 18,2 %        | 9,3 %         | 10,8 %        | 7,7 %         |
| Langfristige Verbindlichkeiten | 14,5 %           | 11,1 %        | 10,0 %        | 7,8 %         | 17,8 %        |
| Kurzfristige Verbindlichkeiten | 40,6 %           | 39,6 %        | 66,4 %        | 51,7 %        | 52,4 %        |
| <b>Gesamt</b>                  | <b>71,3 %</b>    | <b>69,9 %</b> | <b>85,7 %</b> | <b>70,3 %</b> | <b>77,9 %</b> |
| <b>Bilanzsumme</b>             | <b>100 %</b>     | <b>100 %</b>  | <b>100 %</b>  | <b>100 %</b>  | <b>100 %</b>  |

Seite 1071, Abb. 26: Durchschnittliche Bilanzstrukturen deutscher Unternehmen 2012  
(Vgl. Deutsche Bundesbank: Hochgerechnete Angaben aus Jahresabschlüssen deutscher Unternehmen,  
Statistische Sonderveröffentlichung 5, Mai 2015, S. 14 ff.)

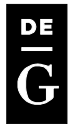

# KAPITEL I: RECHNUNGSWESEN UND CONTROLLING

## 2. BILANZIERUNG UND JAHRESABSCHLUSS

| Erfolgsrechnung deutscher Unternehmen<br>(in Mrd. EUR) |                |                 |
|--------------------------------------------------------|----------------|-----------------|
| Umsatz                                                 | 5.703,9        | 99,5 %          |
| +/- Bestandsveränderungen                              | 27,7           | 0,5 %           |
| <b>Gesamtleistung</b>                                  | <b>5.731,6</b> | <b>100,0 %</b>  |
| Zinserträge                                            | 21,0           | 0,4 %           |
| Übrige Erträge                                         | 253,3          | 4,4 %           |
| <b>Erträge insgesamt</b>                               | <b>6.005,9</b> | <b>104,8 %</b>  |
| Materialaufwand                                        | 3.833,7        | 66,9 %          |
| Personalaufwand                                        | 870,3          | 15,2 %          |
| Abschreibungen                                         | 158,2          | 2,8 %           |
| - auf Sachanlagen                                      | 141,3          | 2,4 %           |
| Zinsaufwendungen                                       | 61,2           | 1,1 %           |
| Betriebssteuern                                        | 68,3           | 1,2 %           |
| - Verbrauchsteuern                                     | 63,2           | 1,1 %           |
| Übrige Aufwendungen                                    | 777,9          | 13,6 %          |
| <b>Aufwendungen insgesamt</b>                          | <b>5.769,7</b> | <b>100,57 %</b> |
| <b>Jahresergebnis vor Steuern</b>                      | <b>236,2</b>   | <b>4,01 %</b>   |
| Steuern                                                | 48,3           | 0,8 %           |
| <b>Jahresergebnis nach Steuern</b>                     | <b>187,9</b>   | <b>3,3 %</b>    |
| Ergebniszuführungen                                    | 15,8           | 0,3 %           |
| Ergebnisabführungen                                    | 57,6           | 1,0 %           |
| <b>Jahresüberschuss nach Steuern</b>                   | <b>146,1</b>   | <b>2,5 %</b>    |

Seite 1077, Abb. 27: Erfolgsrechnung deutscher Unternehmen 2012  
(Vgl. Deutsche Bundesbank: Statistische Sonderveröffentlichung 5. Hochgerechnete Angaben aus Jahresabschlüssen deutscher Unternehmen, Mai 2015)

# KAPITEL I: RECHNUNGSWESEN UND CONTROLLING

## 2. BILANZIERUNG UND JAHRESABSCHLUSS

| Erfolgsrechnung (GuV)                            |  |                            |
|--------------------------------------------------|--|----------------------------|
| Umsatzerlöse                                     |  |                            |
| +/- Bestandsänderung                             |  |                            |
| <b>= Gesamtleistung</b>                          |  |                            |
| + sonstige Erträge                               |  |                            |
| - Materialaufwand                                |  |                            |
| - Personalaufwand                                |  |                            |
| - Abschreibungen                                 |  |                            |
| - sonstige Aufwendungen                          |  | Operatives Ergebnis        |
| + Zinserträge                                    |  |                            |
| - Zinsaufwendungen                               |  | Zinsergebnis               |
| <b>= Ergebnis der gewönl. Geschäftstätigkeit</b> |  |                            |
| + außerordentliche Erträge                       |  |                            |
| - außerordentliche Aufwendungen                  |  | Außerordentliches Ergebnis |
| - Steuern                                        |  |                            |
| <b>= Jahresüberschuss/-fehlbetrag</b>            |  |                            |
| - Gewinnrücklagen                                |  |                            |
| <b>= Bilanzgewinn</b>                            |  |                            |

Seite 1078, Abb. 28: Staffelform der Erfolgsrechnung



# KAPITEL I: RECHNUNGSWESEN UND CONTROLLING

## 2. BILANZIERUNG UND JAHRESABSCHLUSS

| Bilanz der Daimler AG 2014                 |               |               |                                               |               |               |
|--------------------------------------------|---------------|---------------|-----------------------------------------------|---------------|---------------|
| Aktiva                                     | 2014          | 2013          | Passiva                                       | 2014          | 2013          |
| <b>Anlagevermögen</b>                      |               |               | <b>Eigenkapital</b>                           |               |               |
| Immaterielles Vermögen                     | 9.28          | 961           | Gezeichnetes Kapital                          | 3.070         | 3.069         |
| Sachanlagen                                | 8.203         | 7.992         | Kapitalrücklage                               | 11.480        | 11.477        |
| Finanzanlagen                              | 34.641        | 35.795        | Gewinnrücklagen                               | 19.891        | 18.748        |
| davon:                                     |               |               | <b>Bilanzgewinn</b>                           | 2.621         | 2.407         |
| - Anteile an verbundenen Unternehmen       | 32.293        | 31.779        |                                               | <b>37.062</b> | <b>35.701</b> |
| - Ausleihungen an verbundene Unternehmen   | 978           | 813           |                                               |               |               |
| - Beteiligungen                            | 1.355         | 3.185         | <b>Rückstellungen</b>                         |               |               |
| - Sonstige Ausleihungen                    | 15            | 18            | - Pensionen und ähnliche Verpflichtungen      | 1.391         | 3.405         |
|                                            | <b>43.772</b> | <b>44.748</b> | - Übrige Rückstellungen                       | 10.470        | 9.214         |
| <b>Umlaufvermögen</b>                      |               |               |                                               | <b>11.861</b> | <b>12.619</b> |
| Vorräte                                    | 7.846         | 6.682         | <b>Verbindlichkeiten</b>                      |               |               |
| Forderungen aus Lieferungen und Leistungen | 2.216         | 1.940         | - Verbindlich. aus Lieferungen und Leistungen | 5.412         | 5.352         |
| Forderungen geg. --verbundene Unternehmen  | 20.062        | 19.482        | - Verbindlichkeiten geg. verbun. Unternehmen  | 10.141        | 12.774        |
| Übrige Forderungen und Sonstige            | 2.501         | 2.859         | - Übrige Verbindlich-keiten                   | 20.238        | 18.337        |
| Wertpapiere                                | 5.206         | 4.588         |                                               | <b>35.791</b> | <b>36.463</b> |
| Zahlungsmittel                             | 3.399         | 4.718         |                                               |               |               |
|                                            | <b>41.230</b> | <b>40.269</b> |                                               | <b>544</b>    | <b>493</b>    |
| <b>Rechnungsabgrenzung</b>                 | 256           | 259           | <b>Rechnungsabgrenzung</b>                    |               |               |
| <b>Aktiva</b>                              | <b>85.258</b> | <b>85.276</b> | <b>Passiva</b>                                | <b>85.258</b> | <b>85.276</b> |

Seite 1085, Abb. 29: Bilanz der Daimler AG 2014

# KAPITEL I: RECHNUNGSWESEN UND CONTROLLING

## 2. BILANZIERUNG UND JAHRESABSCHLUSS

| Gewinn- und Verlustrechnung der Daimler AG 2014                   |               |               |
|-------------------------------------------------------------------|---------------|---------------|
| Alle Angaben in Millionen Euro                                    | 2014          | 2013          |
| <b>Umsatzerlöse</b>                                               | <b>83.947</b> | <b>75.531</b> |
| – Umsatzkosten                                                    | -75.307       | -68.183       |
| <b>Bruttoergebnis vom Umsatz</b>                                  | <b>8.640</b>  | <b>7.348</b>  |
| – Vertriebskosten                                                 | -6.518        | -6.243        |
| – Allgemeine Verwaltungskosten                                    | -1.885        | -1.779        |
| – Sonstige betriebliche Erträge                                   | 2.117         | 1.921         |
| – Sonstige betriebliche Aufwendungen                              | -995          | -424          |
| – Beteiligungsergebnis                                            | 4.665         | 3.758         |
| – Zinsergebnis                                                    | -751          | -879          |
| – Übriges Finanzergebnis                                          | -279          | -192          |
| <b>Ergebnis der gewöhnlichen Geschäftstätigkeit</b>               | <b>4.994</b>  | <b>3.510</b>  |
| – Steuern vom Einkommen und vom Ertrag<br>(Aufwand, i. V. Ertrag) | -1.223        | 203           |
| <b>Jahresüberschuss</b>                                           | <b>3.771</b>  | <b>3.713</b>  |
| <b>Einstellung in Gewinnrücklagen</b>                             | <b>-1.150</b> | <b>-1.306</b> |
| <b>Bilanzgewinn</b>                                               | <b>2.621</b>  | <b>2.407</b>  |

Seite 1086, Abb. 30: Gewinn- und Verlustrechnung der Daimler AG  
 (Vgl. Daimler-Chrysler (Hrsg.): Geschäftsbericht 2014, Stuttgart 2015, S. 192)



# KAPITEL I: RECHNUNGSWESEN UND CONTROLLING

## 2. BILANZIERUNG UND JAHRESABSCHLUSS

| Thematik                                                     | HGB                          | Sonstige                                   |
|--------------------------------------------------------------|------------------------------|--------------------------------------------|
| Buchführung, Inventar                                        | §§ 238 - 241                 | § 91 AktG, § 33 GenG,<br>§ 41 GmbHG        |
| Aufstellung der Bilanz                                       | §§ 242 - 245                 | §§ 1 - 10 PubLG,<br>§§ 55 - 56a VAG        |
| Vollständigkeit und Inhalt der Bilanz                        | §§ 246 - 250                 |                                            |
| Bewertungsvorschriften                                       | §§ 252 - 256                 |                                            |
| Aufbewahrung und Vorlage der Rechnungsunterlagen             | §§ 257 - 263                 |                                            |
| Ergänzende Vorschriften für Kapitalgesellschaften            | §§ 264 - 289                 | §§ 150 - 174 AktG,<br>§§ 42 - 42a GmbHG    |
| Konzernabschluss                                             | §§ 290 - 315                 | §§ 11 - 15 PubLG,<br>§ 337 AktG, § 56b VAG |
| Prüfung des Jahres- und Konzernabschlusses                   | §§ 316 - 324                 | §§ 53 - 63 GenG,<br>§§ 57 - 64 VAG         |
| Offenlegung                                                  | §§ 325 - 330                 |                                            |
| Strafvorschriften                                            | §§ 331 - 335                 |                                            |
| Ergänzende Vorschriften für Genossenschaften Kreditinstitute | §§ 336 - 339<br>§§ 340 - 340 | §§ 26 - 30 KWG                             |

Seite 1091, Abb. 31: Für die Bilanzanalyse wichtige Paragraphen

# KAPITEL I: RECHNUNGSWESEN UND CONTROLLING

## 2. BILANZIERUNG UND JAHRESABSCHLUSS

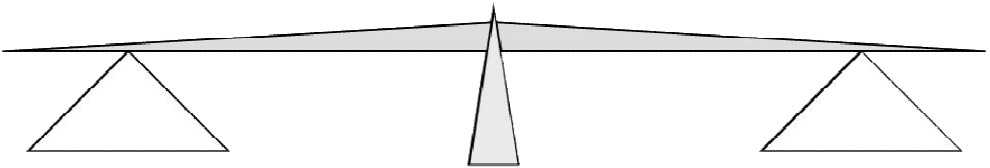

| Aktiva    |               |              | Summe<br>auf beiden<br>Seiten | Passiva                |               |              |
|-----------|---------------|--------------|-------------------------------|------------------------|---------------|--------------|
| Maschinen | Rohstoffe     | Kasse        |                               | Verbindlich-<br>keiten | Darlehen      | Eigenkapital |
| 20.000    | 10.000        | 10.000       | 40.000                        | 10.000                 | 15.000        | 15.000       |
| 20.000    | <b>15.000</b> | <b>5.000</b> | 40.000                        | 10.000                 | 15.000        | 15.000       |
| 20.000    | 15.000        | 5.000        | 40.000                        | <b>6.000</b>           | <b>19.000</b> | 15.000       |
| 20.000    | <b>18.000</b> | 5.000        | <b>43.000</b>                 | <b>9.000</b>           | 19.000        | 15.000       |
| 20.000    | 18.000        | <b>1.000</b> | <b>39.000</b>                 | <b>5.000</b>           | 19.000        | 15.000       |

Seite 1093, Abb. 32: Darstellung der Bilanz im Waagemodell



# KAPITEL I: RECHNUNGSWESEN UND CONTROLLING

## 2. BILANZIERUNG UND JAHRESABSCHLUSS

| S <b>Aktivkonto</b> H |  |                |  |
|-----------------------|--|----------------|--|
| Anfangsbestand        |  | Minderungen    |  |
| Mehrungen             |  | Schlussbestand |  |

| S <b>Passivkonto</b> H |  |                |  |
|------------------------|--|----------------|--|
| Minderungen            |  | Anfangsbestand |  |
| Schlussbestand         |  | Mehrungen      |  |

Seite 1094, Abb. 33: Schema der aktiven und passiven Bestandskosten

# KAPITEL I: RECHNUNGSWESEN UND CONTROLLING

## 2. BILANZIERUNG UND JAHRESABSCHLUSS

| Grundbuch                                                                                                                |           |           |
|--------------------------------------------------------------------------------------------------------------------------|-----------|-----------|
| Dezember 20..                                                                                                            | Seite ..  |           |
|                                                                                                                          | Soll      | Haben     |
| <b>Rohstoffe<br/>an Kasse</b><br>Barverkauf von Rohstoffen von Fa. AB laut Beleg Nr. 86                                  | 5.000 EUR | 5.000 EUR |
| <b>Verbindlichkeiten<br/>an Darlehen</b><br>Bezahlung einer Lieferrechnung der Fa. XY über Darlehen<br>laut Beleg Nr. 83 | 4.000 EUR | 4.000 EUR |
| <b>Rohstoffe<br/>an Verbindlichkeiten</b><br>Zielkauf von Rohstoffen von Fa. AB laut Beleg Nr. 84                        | 3.000 EUR | 3.000 EUR |
| <b>Verbindlichkeiten<br/>an Kasse</b><br>Barzahlung der Lieferrechnung von Fa. XY laut Beleg Nr. 85                      | 4.000 EUR | 4.000 EUR |

Seite 1095, Abb. 34: Darstellung eines Grundbuches (zeitliche Ordnung)

# KAPITEL I: RECHNUNGSWESEN UND CONTROLLING

## 2. BILANZIERUNG UND JAHRESABSCHLUSS

*Quittung* über DM (in Ziffern) Pf

(in Worten) *vierhundertachtzig*

von *Fa. M. Uster*

für *Stahlblech 2mm*

erhalten zu haben, bestätigt

Ort und Tag *Bonn*, den *17.06.* 19*..*

*Eisenwaren Meier*  
Bonn  
Mustergasse 13

*F. Meier*  
Unterschrift des Empfängers

| Konto                       | Soll  | Haben |
|-----------------------------|-------|-------|
| Rohstoffe                   | 480,- |       |
| Kasse                       |       | 480,- |
| Gebucht: 18.6.19. / JVI/2Ka |       |       |

Belegnummer

Kontierungsstempel mit Buchungssatz und Buchungsvermerk  
(J VI/2 = Eintragung im Grundbuch (Journal) für Juni, S.2)

Seite 1096, Abb. 35: Beispiel für einen Beleg  
(Aus didaktischen Gründen wird die Umsatzsteuer nicht berücksichtigt.)

# KAPITEL I: RECHNUNGSWESEN UND CONTROLLING

## 2. BILANZIERUNG UND JAHRESABSCHLUSS

| S            | G+V-Konto | H |
|--------------|-----------|---|
| Aufwendungen | Erträge   |   |
| Gewinn       |           |   |

| S            | G+V-Konto | H       |
|--------------|-----------|---------|
| Aufwendungen | Erträge   |         |
|              |           | Verlust |

Seite 1097, Abb. 36: Schema der Gewinn- und Verlustbuchung im GuV-Konto

# KAPITEL I: RECHNUNGSWESEN UND CONTROLLING

## 2. BILANZIERUNG UND JAHRESABSCHLUSS

| S      Eigenkapital      H |                | S      Eigenkapital      H |                |
|----------------------------|----------------|----------------------------|----------------|
| Schlusskapital             | Anfangskapital | Verlust                    | Anfangskapital |
|                            | Gewinn         | Schlusskapital             |                |

Seite 1098, Abb. 37: Schema der GuV-Buchung im Eigenkapitalkonto

# KAPITEL I: RECHNUNGSWESEN UND CONTROLLING

## 2. BILANZIERUNG UND JAHRESABSCHLUSS

|   |                        |     |        |
|---|------------------------|-----|--------|
| S | Aufwendungen für Waren | H   |        |
|   | 34.000                 | GuV | 34.000 |
| S | Mieten, Pachten        | H   |        |
|   | 14.400                 | G+V | 14.400 |
| S | Umsatzerlöse (UE)      | H   |        |
|   | GuV 68.000             |     | 68.000 |

|       |                          |    |        |
|-------|--------------------------|----|--------|
| S     | Gewinn und Verlust (GuV) | H  |        |
| Waren | 34.000                   | UE | 68.000 |
| Miete | 14.400                   |    |        |
| EK    | 19.600                   |    |        |
|       | 68.000                   |    | 68.000 |

|    |                   |     |        |
|----|-------------------|-----|--------|
| S  | Eigenkapital (EK) | H   |        |
| SB | 57.100            | AB  | 37.500 |
|    |                   | GuV | 19.600 |
|    | 57.100            |     | 57.100 |

Seite 1098, Abb. 38: Buchung von Aufwendungen und Erträgen

# KAPITEL I: RECHNUNGSWESEN UND CONTROLLING

## 2. BILANZIERUNG UND JAHRESABSCHLUSS

| S Fertigerzeugnisse (FE) H   |        | S Unfertige Erzeugnisse (UE) H |        |
|------------------------------|--------|--------------------------------|--------|
| AB                           | 18.000 | BV ↓                           | 6.000  |
|                              |        | SB                             | 12.000 |
|                              | 18.000 |                                | 18.000 |
| S Bestandsveränderung FE H   |        | S Bestandsveränderung UE H     |        |
| BV ↓                         | 6.000  | GuV                            | 6.000  |
|                              |        |                                |        |
| S Gewinn und Verlust (GuV) H |        | S Gewinn und Verlust (GuV) H   |        |
| BV ↓ FE                      | 6.000  | BV ↑ UE                        | 16.000 |
| EK                           | 10.000 |                                |        |
|                              | 16.000 |                                | 16.000 |

Seite 1099, Abb. 39: Berücksichtigung von Bestandsveränderung

# KAPITEL I: RECHNUNGSWESEN UND CONTROLLING

## 2. BILANZIERUNG UND JAHRESABSCHLUSS

| S Privatkonto H  |                      | S Gewinn und Verlust H |                     |
|------------------|----------------------|------------------------|---------------------|
| Entnahmen 20.000 | Kapitaleinlage 5.000 | Aufwendungen 60.000    | Umsatzerlöse 90.000 |
|                  | <b>Saldo 15.000</b>  | <b>Gewinn 30.000</b>   |                     |
| 20.000           | 20.000               | 90.000                 | 90.000              |

  

| S Eigenkapital H       |                        |
|------------------------|------------------------|
| Privat 15.000          | Anfangsbestand 100.000 |
| Schlussbestand 115.000 | <b>Gewinn 30.000</b>   |
| 130.000                | 130.000                |

Seite 1100, Abb. 40: Abschluss der Konten „GuV“ und „Privat“ auf das Eigenkapitalkonto



# KAPITEL I: RECHNUNGSWESEN UND CONTROLLING

## 2. BILANZIERUNG UND JAHRESABSCHLUSS

| Steuerklasse | Persönliche Situation des Arbeitnehmers                                                                                        |
|--------------|--------------------------------------------------------------------------------------------------------------------------------|
| I            | Ledige, geschiedene, verwitwete oder dauernd getrennt lebende verheiratete Arbeitnehmer                                        |
| II           | Arbeitnehmer der Steuerklasse I mit mindestens einem Kind                                                                      |
| III          | Zusammenlebende verheiratete Arbeitnehmer, deren Ehepartner keinen Arbeitslohn beziehen oder in Steuerklasse V eingestuft sind |
| IV           | Verheiratete, die nicht dauernd getrennt leben und beide Arbeitnehmer sind                                                     |
| V            | Verheiratete, zusammenlebende Arbeitnehmer, wenn der Ehepartner in Steuerklasse III eingestuft ist                             |
| VI           | Für die zweite und alle weiteren Beschäftigungen eines Arbeitnehmers, der von verschiedenen Arbeitgebern Einkünfte bezieht     |

Seite 1104, Abb. 41: Steuerklassen

# KAPITEL I: RECHNUNGSWESEN UND CONTROLLING

## 2. BILANZIERUNG UND JAHRESABSCHLUSS

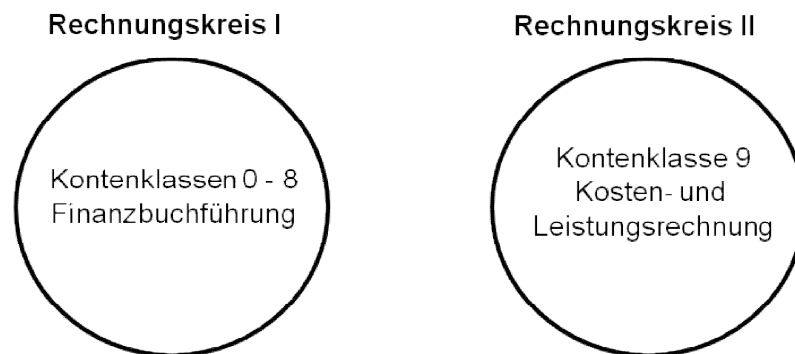

Seite 1109, Abb. 42: Zweikreisystem des IKR

# KAPITEL I: RECHNUNGSWESEN UND CONTROLLING

## 2. BILANZIERUNG UND JAHRESABSCHLUSS

| Bestandskonten, Gliederung nach § 266 HGB (Bilanzgliederung) |                        | Erfolgskonten und Abschlusskonten, Gliederung nach § 275 HGB (Gewinn- und Verlustrechnung) |                        |                   |
|--------------------------------------------------------------|------------------------|--------------------------------------------------------------------------------------------|------------------------|-------------------|
| Aktivkonten                                                  | Passivkonten           | Ertragskonten                                                                              | Aufwandskonten         | Abschlusskonten   |
| Kontenklassen<br>0 - 2                                       | Kontenklassen<br>3 - 4 | Kontenklasse<br>5                                                                          | Kontenklassen<br>6 - 7 | Kontenklasse<br>8 |

Seite 1109, Abb. 43: Abschlussgliederungsprinzip im Rechnungskreis I

# KAPITEL I: RECHNUNGSWESEN UND CONTROLLING

## 2. BILANZIERUNG UND JAHRESABSCHLUSS

| Konten- Klasse/Gruppe/Bezeichnung          | Konten- Klasse/Gruppe/Bezeichnung              |
|--------------------------------------------|------------------------------------------------|
| 0 00 Ausstehende Einlagen                  | 5 90 Umsatzerlöse für eigene Erzeugnisse       |
| 01 Frei                                    | 51 Umsatzerlöse für Waren u. sonstige UE       |
| 02 Konzessionen, Lizenzen u.ä.             | 52 Bestandveränderungen                        |
| 03 Geschäfts- oder Firmenwert              | 53 Andere aktivierte Eigenleistungen           |
| 04 Frei                                    | 54 Sonstige betriebliche Erträge               |
| 05 Grundstücke, Baulen u.ä.                | 55 Erträge aus Beteiligungen                   |
| 06 Frei                                    | 56 Erträge aus anderen Wertpapieren            |
| 07 Technische Anlagen u. Maschinen         | 57 Sonstige Zinsen und ähnliche Erträge        |
| 08 Andere Anlagen, BGA                     | 58 Außerordentliche Erträge                    |
| 09 Geliehene Anzahlungen, Anlagen im Bau   | 59 Frei                                        |
| 1 10 Frei                                  | 6 60 Aufwand f. Roh-, Hilfs- u. Betriebsstoffe |
| 11 Frei                                    | 61 Aufwendungen f. bezogene Leistungen         |
| 12 Frei                                    | 62 Löhne                                       |
| 13 Beteiligungen                           | 63 Gehälter                                    |
| 14 Frei                                    | 64 Gezele, Abgaben/Altlastenversorgung         |
| 15 Wertpapiere des Anlagevermögens         | 65 Abschreibungen                              |
| 16 Sonstige Finanzanlagen                  | 66 Sonstige Personalaufwendungen               |
| 17 Frei                                    | 67 Aufwand f. Dienste und Rechte               |
| 18 Frei                                    | 68 Aufwendungen für Kommunikation              |
| 19 Frei                                    | 69 Aufw. f. sonstige Wertkorrekturen           |
| 2 20 Roh-, Hilfs- und Betriebsstoffe       | 7 70 Betriebliche Steuern                      |
| 21 Unterlagte Erzeugnisse u. Leistungen    | 71 Frei                                        |
| 22 Fertige Erzeugnisse und Waren           | 72 Frei                                        |
| 23 Geleistete Anzahlungen auf Vorstufe     | 73 Frei                                        |
| 24 Ford. aus Lieferungen u. Leistungen     | 74 Abschreibungen auf Finanzanlagen u.ä.       |
| 25 Frei                                    | 75 Zinsen und ähnliche Aufwendungen            |
| 26 Sonstige Vermögensgegenstände           | 76 Außerordentliche Aufwendungen               |
| 27 Wertpapiere des Umlaufvermögens         | 77 Steuern vom Einkommen und Ertrag            |
| 28 Flüssige Mittel                         | 78 Frei                                        |
| 29 Aktive Rechnungsabgrenzung              | 79 Frei                                        |
| 3 30 Eigenkapital/Gezeichnetes Kapital     | 8 80 Prüfung/Abchluss                          |
| 31 Kapitalrücklage                         | 81 Herstellungskosten                          |
| 32 Gewinnrücklagen                         | 82 Vertriebskosten                             |
| 33 Eigenverwendung                         | 83 Allgemeine Verwaltungskosten                |
| 34 Jahresüberschuss/Jahresfehlbetrag       | 84 Sonstige betriebliche Aufwendungen          |
| 35 Sonderposten mit Rücklageanteil         | 85 Korrekturkonten der Kontenklasse 5          |
| 36 Wertberichtigungen                      | 86 Korrekturkonten der Kontenklasse 6          |
| 37 Pensionsrückstellungen u.ä. Verbindl.   | 87 Korrekturkonten der Kontenklasse 7          |
| 38 Steuerrückstellungen                    | 88 Kurzfristige Erfolgsrechnung                |
| 39 Sonstige Rückstellungen                 | 89 Innejährige Rechnungsabgrenzung             |
| 4 40 Frei                                  | 9 90 Unternehmensbezogene Abgrenzungen         |
| 41 Anleihen                                | 91 Kostenrechnende Konten                      |
| 42 Verbindlichkeiten geg. Kreditinstituten | 92 Kostenarten und Leistungsarten              |
| 43 Fiktive Anzahlungen auf Renditeanlagen  | 93 Kreditstellen                               |
| 44 Verbindlichk. aus Lieferungen u. Leist. | 94 Kostenträger                                |
| 45 Wechselverbindlichkeiten                | 95 Fertige Erzeugnisse                         |
| 46 Frei                                    | 96 Interne Lieferungen und Leistungen          |
| 47 Frei                                    | 97 Umsatzkosten                                |
| 48 Sonstige Verbindlichkeiten              | 98 Umsatzerlösen                               |
| 49 Inaktive Rechnungsabgrenzung            | 99 Ergebnisausschüttung                        |

Seite 1111, Abb. 44: Die Kontenklassen, -gruppen und -bezeichnungen des IKR

# KAPITEL I: RECHNUNGSWESEN UND CONTROLLING

## 2. BILANZIERUNG UND JAHRESABSCHLUSS

| Klasse | Inhalt                                                                                                                                                                          |
|--------|---------------------------------------------------------------------------------------------------------------------------------------------------------------------------------|
| 0      | Anlage- und Kapitalkonten:<br>Anlagevermögen (00-05)<br>Langfristiges Kapital (06-07)<br>Berichtigungen zur Bilanz und Ergebnisrechnung (08-09)                                 |
| 1      | Finanz-Umlaufvermögen (10-15)<br>Kurzfristige Verbindlichkeiten (16-19)                                                                                                         |
| 2      | Abgrenzungskonten (20-29)                                                                                                                                                       |
| 3      | Stoff- und Warenkonten: (30-37)<br>Roh-, Hilfs- und Betriebsstoffe (38)<br>Bestandteile und auswärtige Bearbeitungen (39)<br>Handelswaren u. bezogene Fertigerzeugnisse (40-49) |
| 4      | Kostenarten (50-59)                                                                                                                                                             |
| 5      | Kostenstellen (60-69)                                                                                                                                                           |
| 6      | Herstellkosten der Halb- u. Fertigfabrikate (70-79)                                                                                                                             |
| 7      | Kostenträger-Bestände (80-89)                                                                                                                                                   |
| 8      | Erträge der betrieblichen Tätigkeit (90-99)                                                                                                                                     |
| 9      | Abschlusskonten                                                                                                                                                                 |

Seite 1112, Abb. 45: Die Kontenklassen des GKR

# KAPITEL I: RECHNUNGSWESEN UND CONTROLLING

## 2. BILANZIERUNG UND JAHRESABSCHLUSS

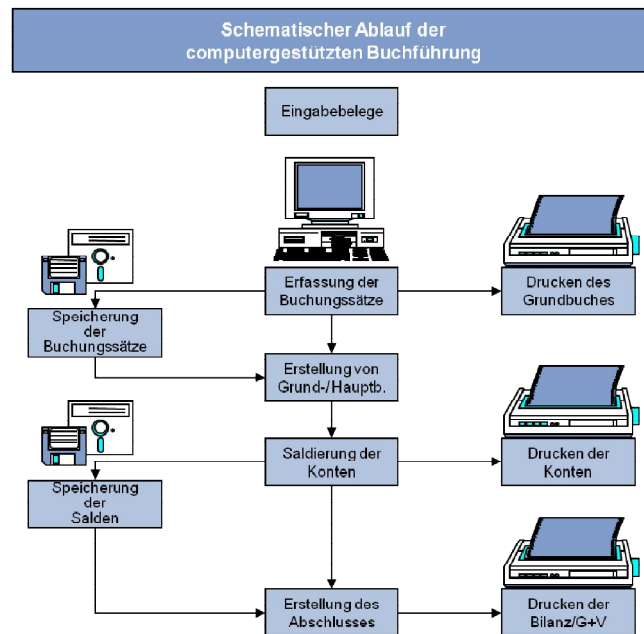

Seite 1114, Abb. 46: Schematischer Ablauf der computergestützten Buchführung

### 3. KOSTENRECHNUNG

3.1 AUFGABEN DES KOSTENRECHNUNG

3.2 VARIABLE UND FIXE KOSTEN

3.3 KOSTENRECHNUNGSSYSTEME

3.4 KOSTENARTENRECHNUNG

3.5 KOSTENSTELLENRECHNUNG

3.6 DIE KOSTENTRÄGERVERSTÜCKRECHNUNG (KALKULATION)

3.7 DIE DECKUNGSBEITRAGSRECHNUNG

3.8 EINFÜHRUNG IN DIE PLANKOSTENRECHNUNG

3.9 GRUNDZÜGE DER PROZESSKOSTEN- UND ZIELKOSTENRECHNUNG

*Jung: Allgemeine Betriebswirtschaftslehre. De Gruyter Oldenbourg 2016. ISBN 978-3-486-76376-8*

## KAPITEL I: RECHNUNGSWESEN UND CONTROLLING

### 3. KOSTENRECHNUNG

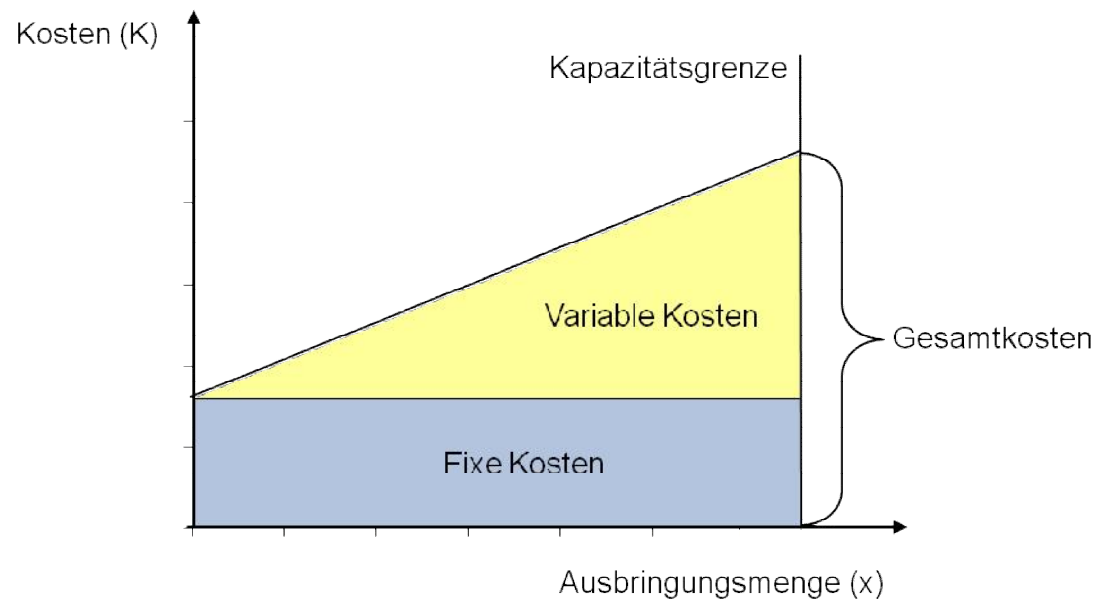

Seite 1116, Abb. 47: Kostenfunktion



# KAPITEL I: RECHNUNGSWESEN UND CONTROLLING

## 3. KOSTENRECHNUNG

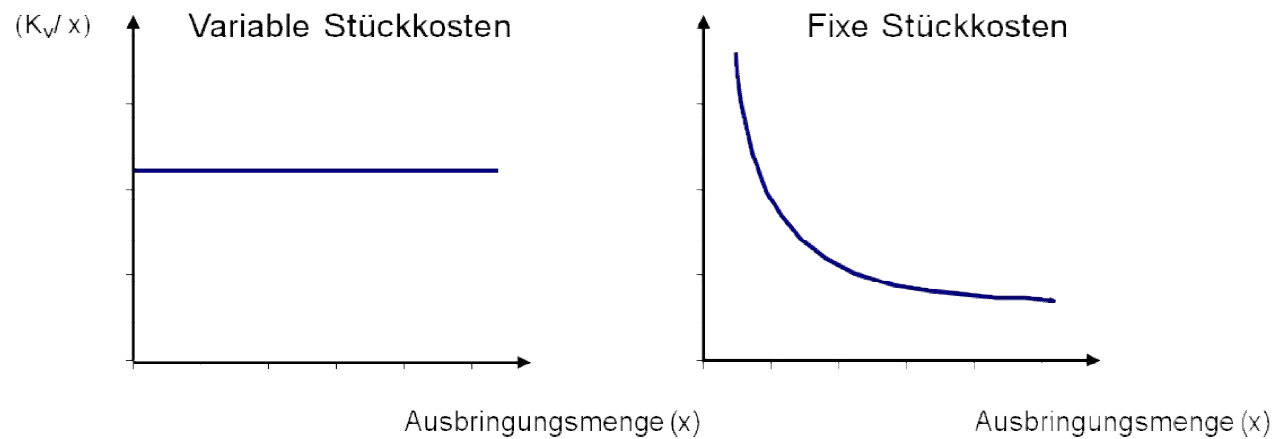

Seite 1117, Abb. 48: Variable und fixe Stückkosten

# KAPITEL I: RECHNUNGSWESEN UND CONTROLLING

## 3. KOSTENRECHNUNG

| <b>Kostenrechnungs-<br/>system</b> | <b>Istkostenrechnung</b>                 | <b>Plankostenrechnung</b>                 |
|------------------------------------|------------------------------------------|-------------------------------------------|
| <b>Vollkostenrechnung</b>          | Istkostenrechnung auf<br>VollkostenBasis | Plankostenrechnung auf<br>VollkostenBasis |
| <b>Teilkostenrechnung</b>          | Istkostenrechnung auf<br>TeilkostenBasis | Plankostenrechnung auf<br>TeilkostenBasis |

Seite 1118, Abb. 49: Kombinationen der Kostenrechnungssysteme

# KAPITEL I: RECHNUNGSWESEN UND CONTROLLING

## 3. KOSTENRECHNUNG

| Aufgabe                                                | Kombinationssystem                                                                                    |
|--------------------------------------------------------|-------------------------------------------------------------------------------------------------------|
| Kurzfristige Erfolgsrechnung                           | Istkostenrechnung auf Vollkosten-Basis<br>oder<br>Istkostenrechnung auf Teilkosten-Basis              |
| Wirtschaftlichkeitskontrolle                           | Istkostenrechnung auf Voll-/Teilkosten-Basis<br>oder<br>Plankostenrechnung auf Voll-/Teilkosten-Basis |
| Unternehmensentscheidungen                             | Plankostenrechnung auf Teilkosten-Basis                                                               |
| Bereitstellung von Zahlenmaterial für die Bilanzierung | Istkostenrechnung auf Vollkosten-Basis                                                                |

Seite 1119, Abb. 50: Eignung der Kombinationssysteme für bestimmte Aufgaben

# KAPITEL I: RECHNUNGSWESEN UND CONTROLLING

## 3. KOSTENRECHNUNG

|                                                                           |                                           |                        |
|---------------------------------------------------------------------------|-------------------------------------------|------------------------|
| Abhängigkeit der Kosten<br>von<br>Beschäftigungsänderungen                | <b>Fixe Kosten</b>                        | <b>Variable Kosten</b> |
| Zurechnung der Kosten auf<br>ein Bezugsobjekt<br>(Leistungsmengeneinheit) | <b>Gemeinkosten</b><br>(fix und variabel) | <b>Einzelkosten</b>    |

Seite 1121, Abb. 51: Zusammenhang zwischen fixen und variablen sowie Einzel- und Gemeinkosten

# KAPITEL I: RECHNUNGSWESEN UND CONTROLLING

## 3. KOSTENRECHNUNG

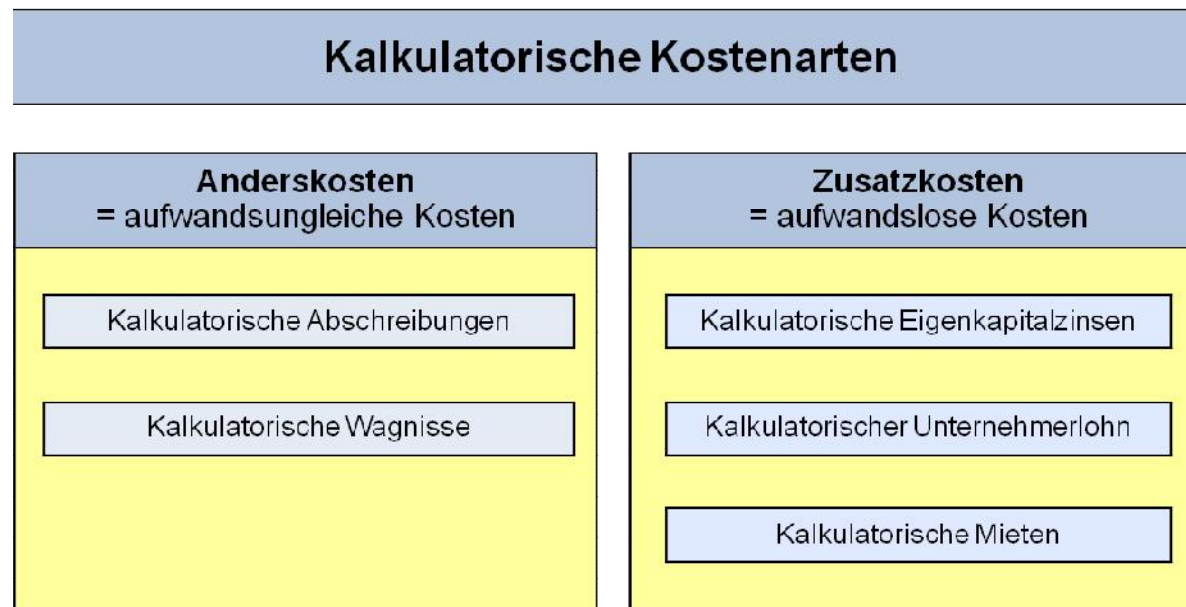

Seite 1122, Abb. 52: Kalkulatorische Kostenarten

## KAPITEL I: RECHNUNGSWESEN UND CONTROLLING

### 3. KOSTENRECHNUNG

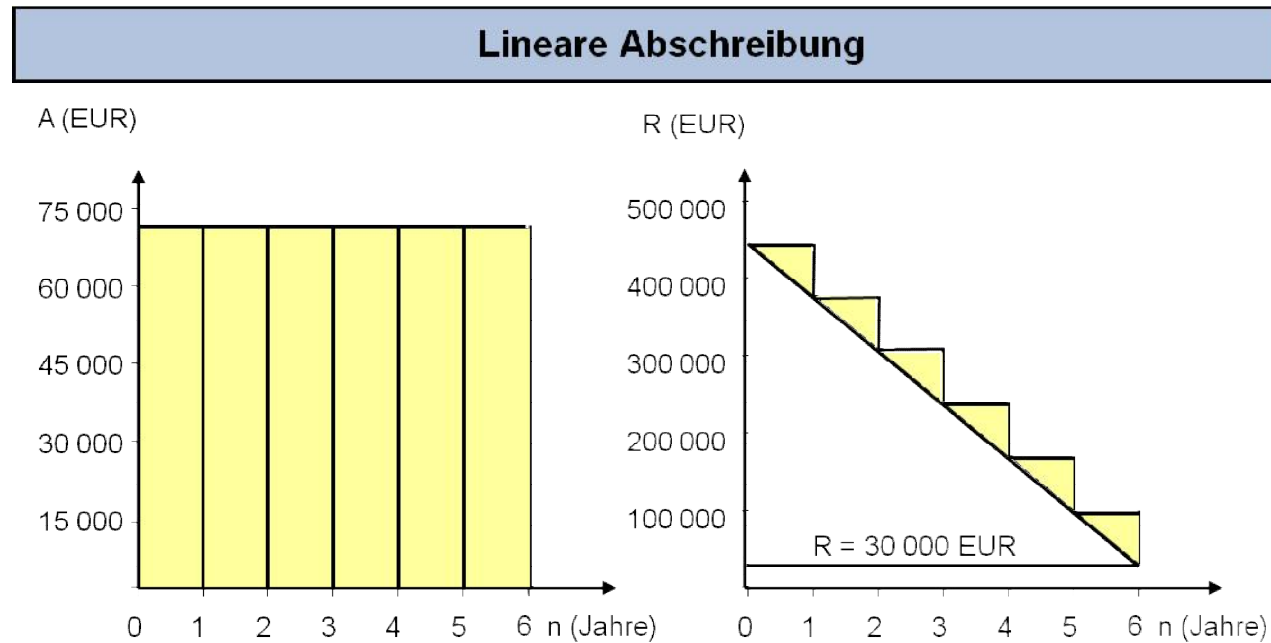

Seite 1124, Abb. 53: Lineare Abschreibung

# KAPITEL I: RECHNUNGSWESEN UND CONTROLLING

## 3. KOSTENRECHNUNG

### Leistungsabschreibung (kalkulatorisch)

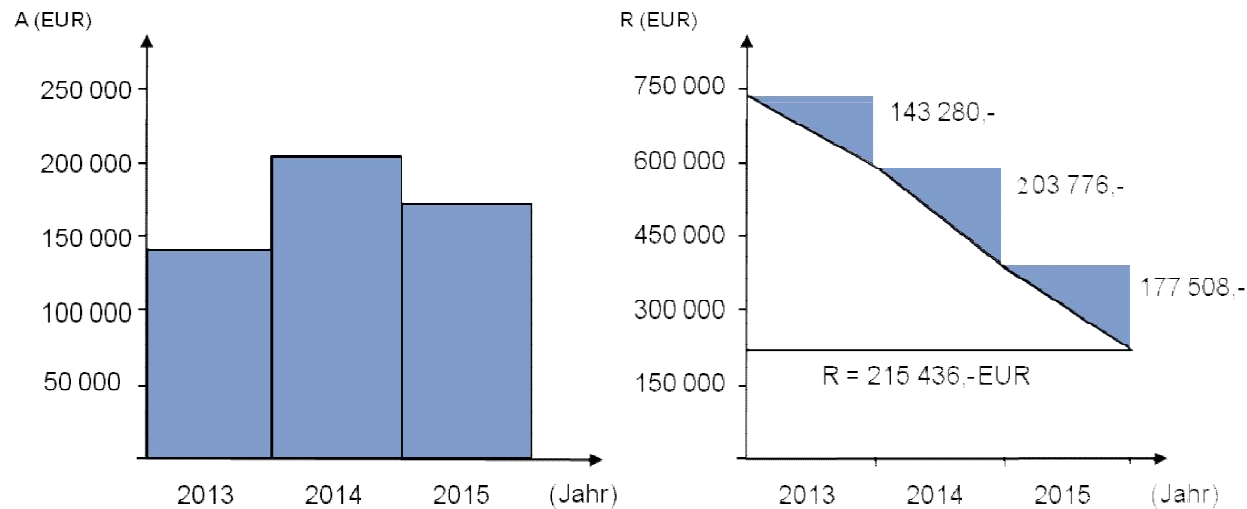

Seite 1125, Abb. 54: Leistungsabschreibung

## KAPITEL I: RECHNUNGSWESEN UND CONTROLLING

### 3. KOSTENRECHNUNG

#### Darstellung des arithmetisch-degressiven Abschreibungsverlaufs

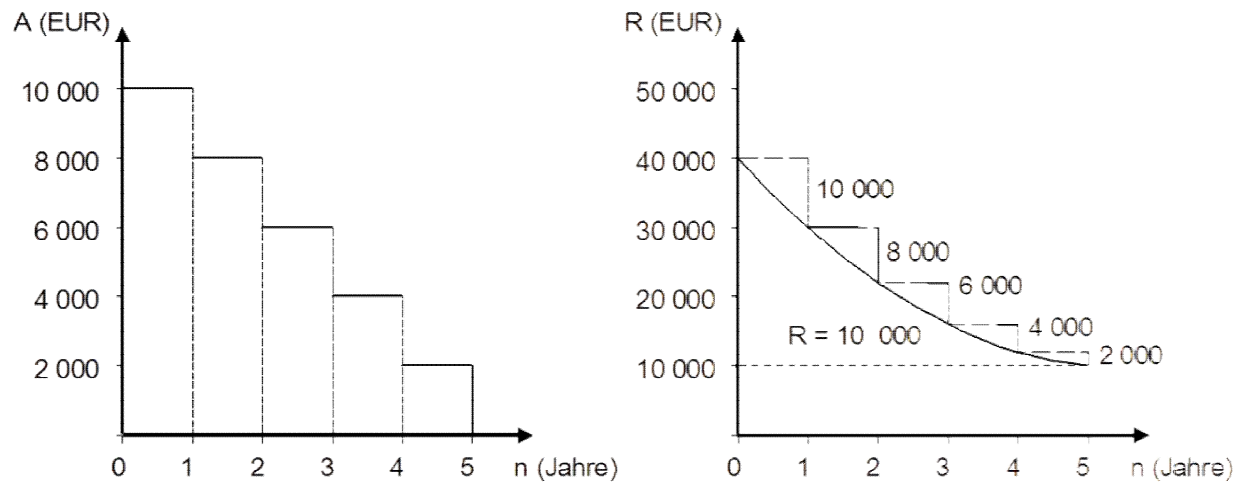

Seite 1126, Abb. 55: Darstellung des arithmetisch-degressiven Abschreibungsverlaufs



# KAPITEL I: RECHNUNGSWESEN UND CONTROLLING

## 3. KOSTENRECHNUNG

| Kriterium                     | Kalkulatorische Abschreibung                                     | Bilanzielle Abschreibung                                                            | Steuerliche Abschreibung                                              |
|-------------------------------|------------------------------------------------------------------|-------------------------------------------------------------------------------------|-----------------------------------------------------------------------|
| <b>Zielsetzung</b>            | Erfassung des tatsächlichen Werteverzehrs                        | Bilanzpolitische Ziele (Verschleierung des Vermögens und des Gewinns)               | Beeinflussung des zu versteuernden Gewinns                            |
| <b>Gesetzliche Regelung</b>   | Keine                                                            | §§ 253 ff HGB                                                                       | § 7 EStG                                                              |
| <b>Abschreibungsgründe</b>    | Wiederbeschaffungswert                                           | Anschaffungskosten oder Herstellungskosten                                          |                                                                       |
| <b>Nutzungsdauer</b>          | Frei wählbar, möglichst realistische Schätzung der Nutzungsdauer | Festlegung der Nutzungsdauer nach bilanzpolitischen Zielen                          | Nutzungsdauer richtet sich nach AfA-Tabellen                          |
| <b>Abschreibungsverfahren</b> | Alle Verfahren können angewandt werden                           | Abschreibungsverfahren müssen dem Grundsatz ordnungsgemäßer Buchführung entsprechen | Abschreibungsverfahren und -sätze werden durch Steuergesetze geregelt |

Seite 1127, Abb. 56 (Teil 1): Vergleich der kalkulatorischen, bilanziellen und steuerlichen Abschreibung (Vgl. Wöhe, G./ Kaiser, H./ Döring, U.: Übungsbuch zur Einführung in die Allgemeine Betriebswirtschaftslehre, 6. Aufl., München 1990, S. 488 f.)

Jung: Allgemeine Betriebswirtschaftslehre. De Gruyter Oldenbourg 2016. ISBN 978-3-486-76376-8

# KAPITEL I: RECHNUNGSWESEN UND CONTROLLING

## 3. KOSTENRECHNUNG

| Kriterium                                                               | Kalkulatorische Abschreibung                                                                                                                     | Bilanzielle Abschreibung                                                                                                                                      | Steuerliche Abschreibung                                                           |
|-------------------------------------------------------------------------|--------------------------------------------------------------------------------------------------------------------------------------------------|---------------------------------------------------------------------------------------------------------------------------------------------------------------|------------------------------------------------------------------------------------|
| <b>Außerplan-mäßige Abschreibung</b>                                    | Würde in der Kosten-rech-nung stö-ren, des-halb Ansatz von kal-ku--latori-schen Wag-nissen                                                       | nach § 253 Abs. 2 HGB erlaubt                                                                                                                                 | Nur bei linearer AfA erlaubt (§ 7 EStG), ansonsten Teilwert-ab-schrei-bung möglich |
| <b>Tatsäch-liche Nutzungs-dauer größer als geschätzte Nutzungsdauer</b> | Nach der Abschrei-bung des Grundwer-tes wer-den bis zum Aus-schei-den der An-lage Ab-schreibungs-be--träg e in der bishe-ri-gen Höhe verrech-net | Nach der Abschreibung des Abschrei-bungs-grundwertes (Anschaffungs- oder Herstel-lungs-kosten) sind keine weiteren Abschreibungen möglich, Restbuchwert 1 EUR |                                                                                    |
| <b>Kapital-erhaltung</b>                                                | Erhaltung der Substanz                                                                                                                           | Erhaltung des nominellen Kapitals                                                                                                                             |                                                                                    |

Seite 1127, Abb. 56 (Teil 2): Vergleich der kalkulatorischen, bilanziellen und steuerlichen Abschreibung (Vgl. Wöhe, G./Kaiser, H./Döring, U.: Übungsbuch zur Einführung in die Allgemeine Betriebswirtschaftslehre, 6. Aufl., München 1990, S. 488 f.)

# KAPITEL I: RECHNUNGSWESEN UND CONTROLLING

## 3. KOSTENRECHNUNG

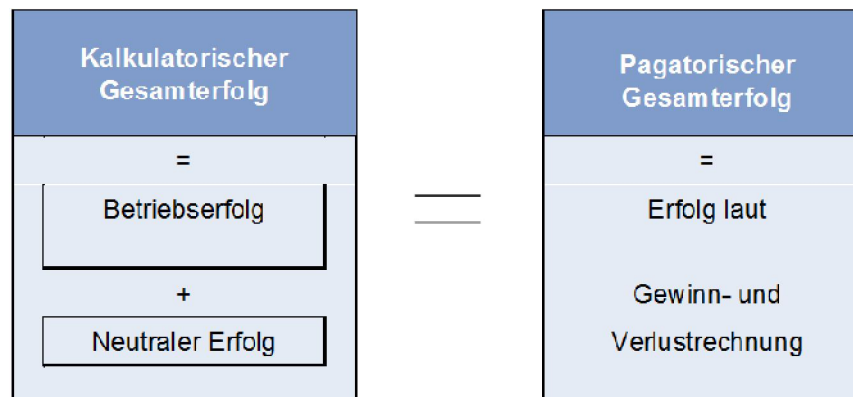

Seite 1133, Abb. 57: Kalkulatorischer und pagatorischer Erfolg

# KAPITEL I: RECHNUNGSWESEN UND CONTROLLING

## 3. KOSTENRECHNUNG

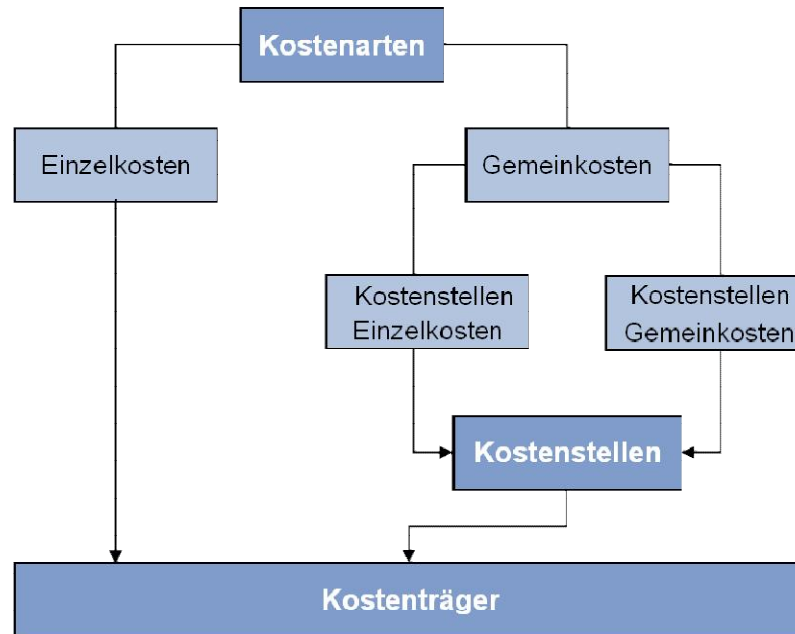

Seite 1135, Abb. 58: Zusammenhang zwischen Kostenarten-, Kostenstellen- und Kostenträgerrechnung

## KAPITEL I: RECHNUNGSWESEN UND CONTROLLING

### 3. KOSTENRECHNUNG

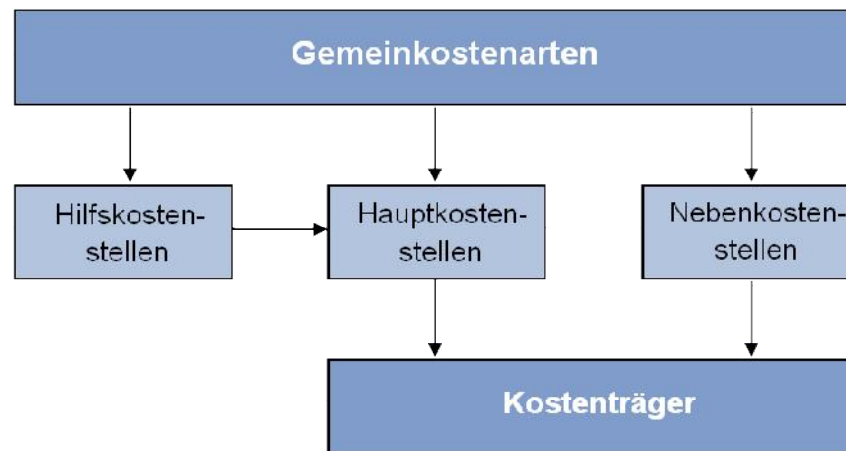

Seite 1136, Abb. 59: Verteilung der Gemeinkosten über die Kostenstellen auf die Kostenträger

# KAPITEL I: RECHNUNGSWESEN UND CONTROLLING

## 3. KOSTENRECHNUNG

| Betriebsabrechnungsbogen (BAB)     |                                                 |                             |                        |                              |                   |          |         |               |                       |                    |               |                     |                                                                                |
|------------------------------------|-------------------------------------------------|-----------------------------|------------------------|------------------------------|-------------------|----------|---------|---------------|-----------------------|--------------------|---------------|---------------------|--------------------------------------------------------------------------------|
| Kostenarten                        | Kostenstellen<br>Zahlen<br>der Buch-<br>haltung | Allgemeine<br>Kostenstellen |                        | Fertig-<br>Hilfs-<br>Stellen | Fertigungsstellen |          |         |               | Materialstellen       |                    |               | Verwalt.-<br>Stelle | Vertriebs-<br>stelle                                                           |
|                                    |                                                 | Wasser-<br>versorgung       | Energie-<br>versorgung | Arbeits-<br>vorbereitung     | Fräseerei         | Dreherei | Montage | Summen<br>F-H | Einkauf               | Material-<br>Lager | Summen<br>K-L |                     |                                                                                |
| A                                  | B                                               | C                           | D                      | E                            | F                 | G        | H       | I             | K                     | L                  | M             | N                   | O                                                                              |
| 1. Fertigungslohn-Einzelkosten     | 3 700                                           |                             |                        |                              | 1 000             | 1 100    | 1 600   |               |                       |                    |               |                     |                                                                                |
| 2. Fertigungsmaterial-Einzelkosten | 12 300                                          |                             |                        |                              |                   |          |         |               |                       |                    | 12 300        |                     |                                                                                |
| 3. Summe Einzelkosten              | 16 000                                          |                             |                        |                              |                   |          |         |               |                       |                    |               |                     |                                                                                |
| 4. Hilfslohn                       | 3 960                                           | 105                         | 92                     | 57                           | 592               | 620      | 1 200   | 2 412         | 34                    | 400                | 434           | 400                 | 400                                                                            |
| 5. Gehälter                        | 2 240                                           | 7                           | 5                      | 160                          | 224               | 232      | 203     | 659           | 12                    | 58                 | 70            | 630                 | 709                                                                            |
| 6. Gesetzl. Sozialleistungen       | 365                                             | 9                           | 5                      | 5                            | 59                | 78       | 74      | 211           | 4                     | 39                 | 43            | 45                  | 47                                                                             |
| 7. Werkzeugverbrauch               | 100                                             | 3                           | 8                      | -                            | 24                | 36       | 28      | 88            | -                     | 11                 | 11            | -                   | -                                                                              |
| 8. Instandhaltungskosten           | 210                                             | 13                          | 19                     | 7                            | 42                | 31       | 49      | 122           | -                     | 15                 | 15            | 16                  | 18                                                                             |
| 9. Hilfsmaterialverbrauch          | 690                                             | 4                           | 90                     | 8                            | 114               | 181      | 274     | 569           | 2                     | 6                  | 8             | 5                   | 6                                                                              |
| 10. Versicherungskosten            | 159                                             | 7                           | 8                      | 6                            | 22                | 29       | 26      | 77            | -                     | 20                 | 20            | 19                  | 22                                                                             |
| 11. Kalkulat. Abschreibungen       | 565                                             | 12                          | 10                     | 14                           | 123               | 154      | 152     | 429           | 4                     | 48                 | 52            | 24                  | 24                                                                             |
| 12. Kalkulat. Zinsen               | 109                                             | 3                           | 2                      | 3                            | 19                | 20       | 21      | 60            | 1                     | 14                 | 15            | 13                  | 13                                                                             |
| 13. Kalkulat. Wagnisse             | 86                                              | 2                           | 3                      | 2                            | 13                | 22       | 24      | 59            | 2                     | 9                  | 11            | 3                   | 6                                                                              |
| 14. Kalkulat. Unternehmerlohn      | 142                                             | -                           | -                      | 7                            | 17                | 21       | 19      | 57            | 3                     | 6                  | 9             | 40                  | 29                                                                             |
| 15. Sonstige Gemeinkosten          | 84                                              | 6                           | 9                      | -                            | 17                | 17       | 14      | 48            | 1                     | 7                  | 8             | 7                   | 6                                                                              |
| 16. Summe primäre Gemeinkosten     | 8 720                                           | 121                         | 251                    | 269                          | 1 266             | 1 441    | 2 084   | 4 791         | 63                    | 633                | 696           | 1 202               | 1 340                                                                          |
| 17. Umlage Wasserversorgung        |                                                 | L→                          | 20                     | 4                            | 51                | 46       | 42      | 139           | -                     | 4                  | 4             | 2                   | 2                                                                              |
| 18. Umlage Energieversorgung       |                                                 |                             | L→                     | 3                            | 81                | 90       | 85      | 256           | 1                     | 5                  | 6             | 3                   | 3                                                                              |
| 19. Summe                          |                                                 |                             |                        | 276                          | 1 398             | 1 577    | 2 211   | 5 186         | 64                    | 642                | 706           | 1 207               | 1 345                                                                          |
| 20. Umlage Arbeitsvorbereitung     |                                                 |                             |                        | L→                           | 86                | 98       | 92      | 276           |                       |                    |               |                     |                                                                                |
| 21. Ges. Fertigungs-Gemeinkosten   |                                                 |                             |                        |                              | 1 484             | 1 675    | 2 303   | 5 462         | Material-Gemeinkosten |                    |               | 706                 | Verwalt.-/Vertriebs-<br>Zuschlag bezogen<br>auf Herstellkosten!<br>HK = 22 168 |
| 22. Fertigungslohn-Einzelkosten    |                                                 |                             |                        |                              | 1 000             | 1 100    | 1 600   | 3 700         | Material-Einzelkosten |                    |               | 12 300              |                                                                                |
| 23. Ges. Fertigungskosten          |                                                 |                             |                        |                              | 2 484             | 2 775    | 3 903   | 9 162         | Ges. Materialkosten   |                    |               | 13 006              |                                                                                |
| 24. Zuschlagssatz in %             |                                                 |                             |                        |                              | 140,4 %           | 153,3 %  | 143,9 % |               |                       |                    | 5,74 %        | 5,44 %              | 6,07 %                                                                         |

Seite 1143, Abb. 60: Betriebsabrechnungsbogen

# KAPITEL I: RECHNUNGSWESEN UND CONTROLLING

## 3. KOSTENRECHNUNG

| Verfahren:                                   | Anwendungsgebiete:                                                                                                                                         |
|----------------------------------------------|------------------------------------------------------------------------------------------------------------------------------------------------------------|
| <b>Einstufige Divisionskalkulation</b>       | Ermittlung der Selbstkosten pro Leistungseinheit für Einprodukt-Betriebe, Abrechnung allgemeiner Kostenstellen (z. B. unternehmenseigene Wasserversorgung) |
| <b>Mehrstufige Divisionskalkulation</b>      | Ermittlung der Selbstkosten pro Leistungseinheit bei einheitlicher Massenfertigung mit mehreren Produktionsstufen und Zwischenlagern                       |
| <b>Äquivalenzziffernkalkulation</b>          | Ermittlung der Selbstkosten pro Leistungseinheit für Betriebe mit Sortenfertigung durch Verhältniszahlen (Wertigkeitsziffern)                              |
| <b>Summarische Zuschlagskalkulation</b>      | Geeignet für Kleinbetriebe mit einer geringen Anzahl von Gemeinkostenarten (z. B. nur Lohn- und Materialzuschlag)                                          |
| <b>Differenzierende Zuschlagskalkulation</b> | Geeignet zur Ermittlung der Selbstkosten pro Leistungseinheit für Betriebe mit Serien- und Einzelfertigung.                                                |

Seite 1146, Abb. 61: Verfahren der Kostenträgerstückrechnung

# KAPITEL I: RECHNUNGSWESEN UND CONTROLLING

## 3. KOSTENRECHNUNG

| Kalkulationsschema                                    |                                                    |
|-------------------------------------------------------|----------------------------------------------------|
| Materialeinzelkosten (MEK)                            |                                                    |
| + Materialgemeinkosten (MGK)                          | MEK · MGK-Zuschlagssatz                            |
| = <b>Materialkosten (MK)</b>                          |                                                    |
| Fertigungseinzelkosten Fräselei (FEK <sub>F</sub> )   |                                                    |
| + Fertigungsgemeinkosten Fräselei (FGK <sub>F</sub> ) | FEK <sub>F</sub> · FGK <sub>F</sub> -Zuschlagssatz |
| Fertigungseinzelkosten Dreherei (FEK <sub>D</sub> )   |                                                    |
| + Fertigungsgemeinkosten Dreherei (FGK <sub>D</sub> ) | FEK <sub>D</sub> · FGK <sub>D</sub> -Zuschlagssatz |
| Fertigungseinzelkosten Montage (FEK <sub>M</sub> )    |                                                    |
| + Fertigungsgemeinkosten Montage (FGK <sub>M</sub> )  | FEK <sub>M</sub> · FGK <sub>M</sub> -Zuschlagssatz |
| + Sondereinzelkosten Fertigung (SEKF)                 |                                                    |
| = <b>Fertigungskosten (FK)</b>                        |                                                    |
| Herstellungskosten (HK)                               | MK + FK                                            |
| + Verwaltungsgemeinkosten (VwGK)                      | HK · VwGK-Zuschlagssatz                            |
| + Vertriebsgemeinkosten (VtGK)                        | HK · VtGK-Zuschlagssatz                            |
| + Sondereinzelkosten Vertrieb (SEK <sub>Vt</sub> )    |                                                    |
| = <b>Selbstkosten (SK)</b>                            |                                                    |
| + Gewinnaufschlag (Gew)                               | SK · Gew-Zuschlagssatz                             |
| = Barverkaufspreis (BVP)                              |                                                    |
| + Kundenskonto (Ksk)                                  | BVP · Ksk-Zuschlagssatz                            |
| = Zielverkaufspreis (ZVP)                             |                                                    |
| + Kundenrabatt (Krab)                                 | ZVP · Krab-Zuschlagssatz                           |
| = <b>Listenverkaufspreis netto (LVP)</b>              |                                                    |
| + Mehrwertsteuer (MwSt)                               | LVP · MwSt-Zuschlagssatz                           |
| = <b>Angebotspreis brutto (AP)</b>                    |                                                    |

Seite 1150, Abb. 62: Darstellung eines Kalkulationsschemas



## KAPITEL I: RECHNUNGSWESEN UND CONTROLLING

### 3. KOSTENRECHNUNG

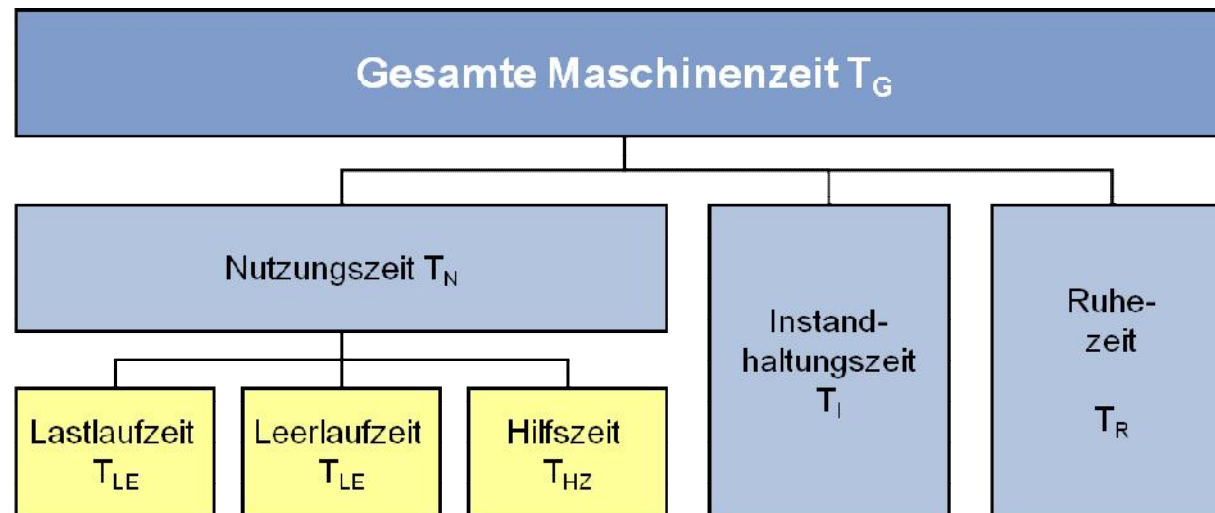

Seite 1151, Abb. 63: Gliederung der Maschinenzeit



# KAPITEL I: RECHNUNGSWESEN UND CONTROLLING

## 3. KOSTENRECHNUNG

| Maschinenstundensatzkarte                                                         |                                                               |              |
|-----------------------------------------------------------------------------------|---------------------------------------------------------------|--------------|
| Maschinen-Nr.: 18                                                                 | Mittlere Leistungsaufnahme: 20 kW                             |              |
| Bezeichnung: CNC-Drehautomat                                                      | Wiederbeschaffungskosten: 355.000 EUR                         |              |
| Standort: Werkshalle A                                                            | Gesamtleistungspotenzial: 20.000 h                            |              |
| Anschaffungsjahr: 2015                                                            | Monatliche Leistung: 150 h / Monat                            |              |
| Kostenart                                                                         | Berechnung                                                    | Betrag EUR/h |
| Abschreibung                                                                      | $\frac{355\,000,-}{20\,000\text{ h}}$                         | 17,75        |
| Instandhaltung und Wartung                                                        | Erfahrungswert                                                | 7,80         |
| Kalkulatorische Zinsen<br>(10 % auf das<br>durchschnittlich gebundene<br>Kapital) | $\frac{355\,000,- \cdot 10\%}{2 \cdot 12 \cdot 150\text{ h}}$ | 9,86         |
| Raumkosten<br>(15m <sup>2</sup> zu 20,- EUR pro m <sup>2</sup> )                  | $\frac{15 \cdot 20,-}{150\text{ h}}$                          | 2,00         |
| Betriebsstoffkosten                                                               | $\frac{730,-}{150\text{ h}}$                                  | 4,87         |
| Energieverbrauch                                                                  | 20 kW zu je 0,20 EUR/kWh                                      | 4,00         |
| <b>Maschinenstundensatz</b>                                                       |                                                               | <b>46,28</b> |

Seite 1152, Abb. 64: Beispiel für eine Maschinenstundensatzkarte

## KAPITEL I: RECHNUNGSWESEN UND CONTROLLING

### 3. KOSTENRECHNUNG

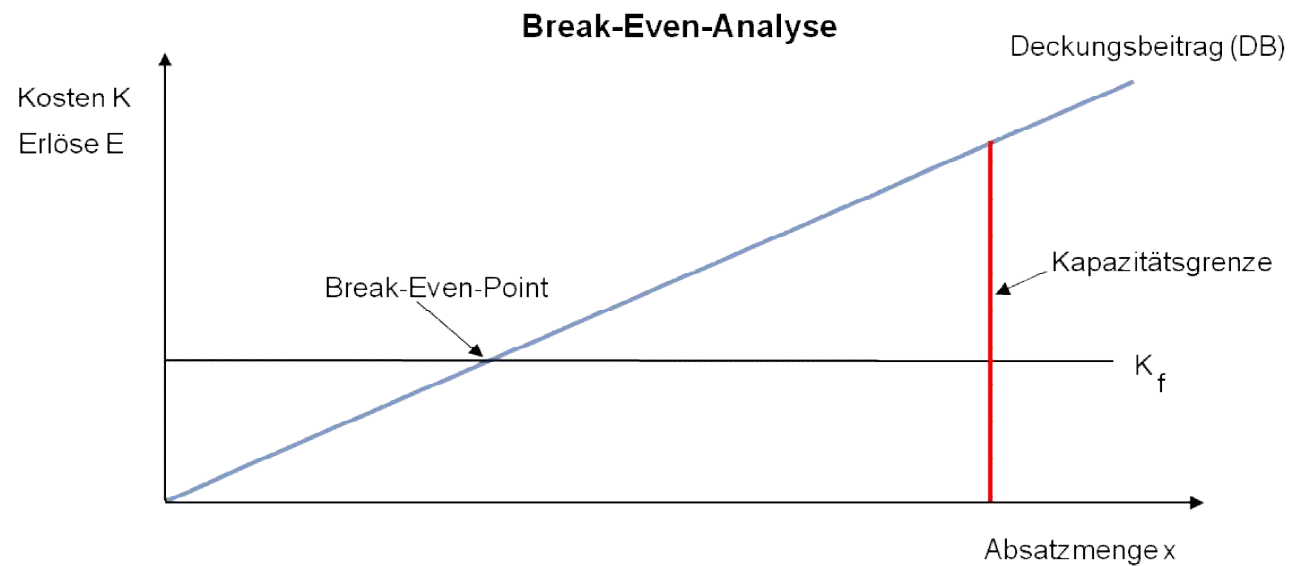

Seite 1155, Abb. 65: Kritische Menge und Break-even-point

# KAPITEL I: RECHNUNGSWESEN UND CONTROLLING

## 3. KOSTENRECHNUNG

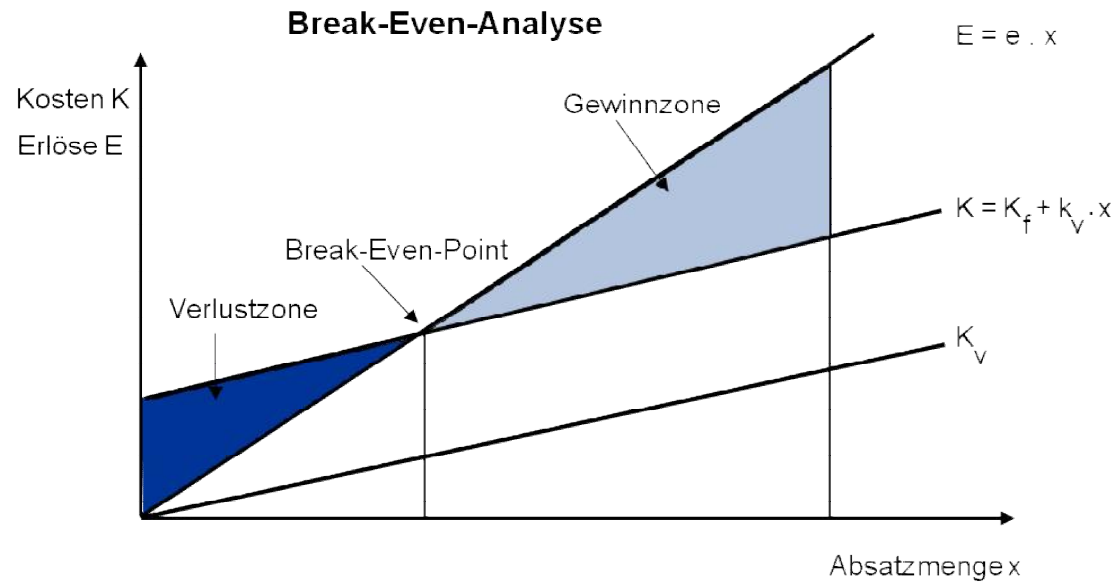

Seite 1155, Abb. 66: Gewinn- und Verlustzone

# KAPITEL I: RECHNUNGSWESEN UND CONTROLLING

## 3. KOSTENRECHNUNG

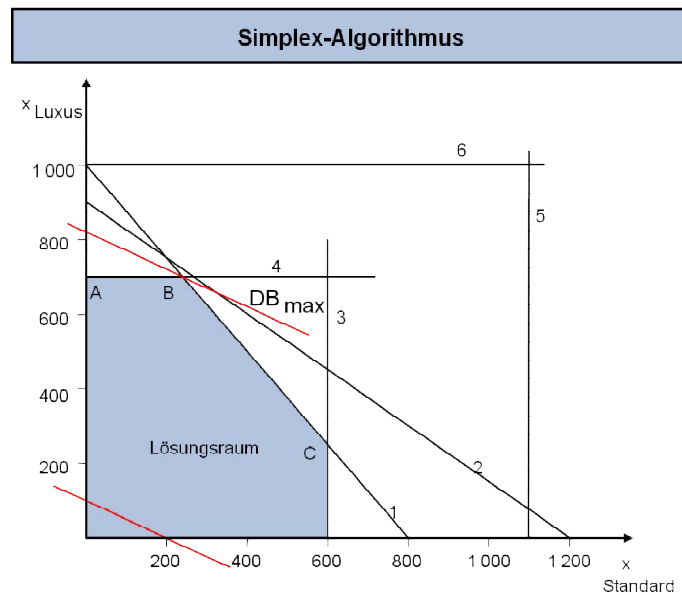

Seite 1159, Abb. 67: Grafische Lösung des Simplex-Algorithmus

# KAPITEL I: RECHNUNGSWESEN UND CONTROLLING

## 3. KOSTENRECHNUNG

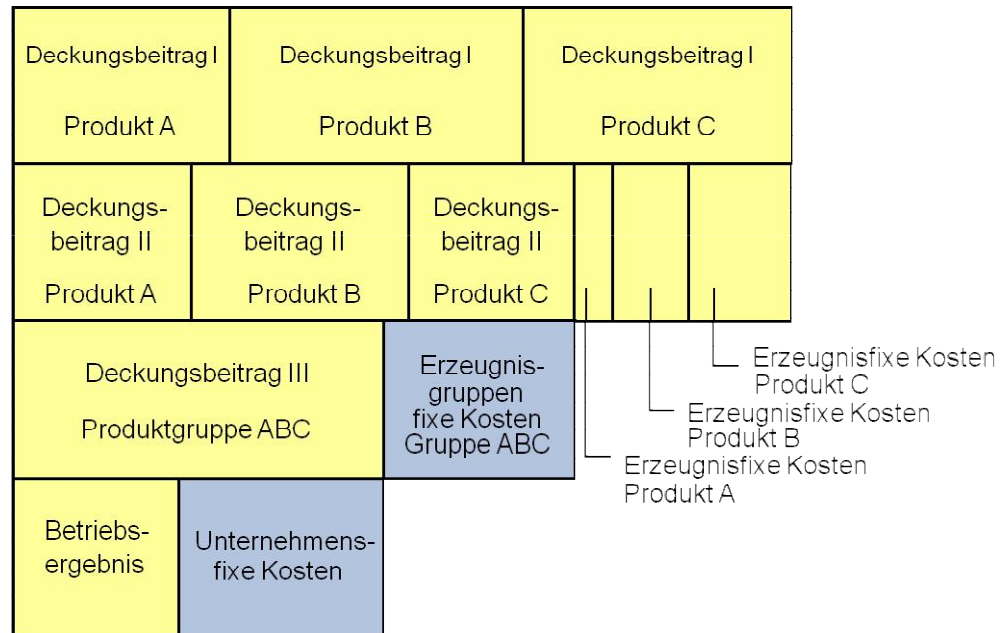

Seite 1160, Abb. 68: Mehrstufige Deckungsbeitragsrechnung

# KAPITEL I: RECHNUNGSWESEN UND CONTROLLING

## 3. KOSTENRECHNUNG

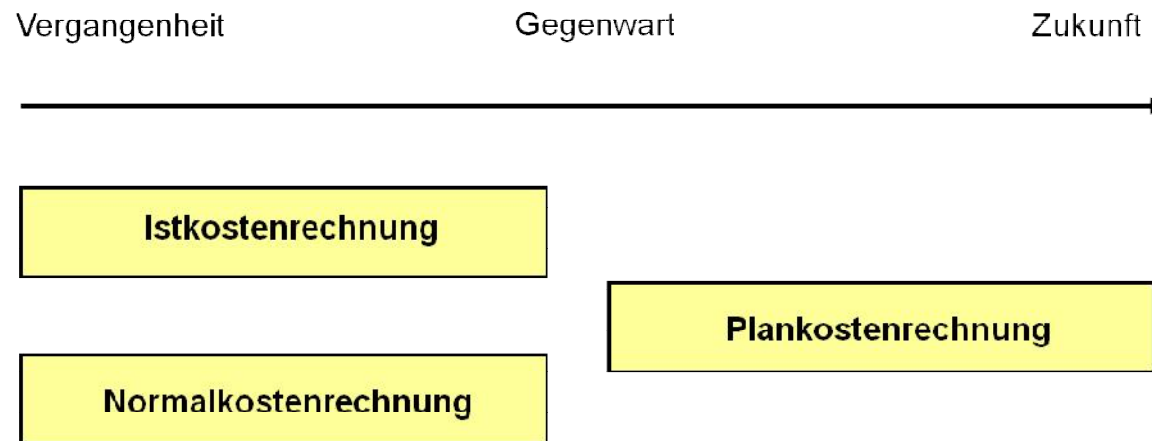

Seite 1161, Abb. 69: Zeitliche Orientierung der Kostenrechnungsverfahren

## KAPITEL I: RECHNUNGSWESEN UND CONTROLLING

### 3. KOSTENRECHNUNG

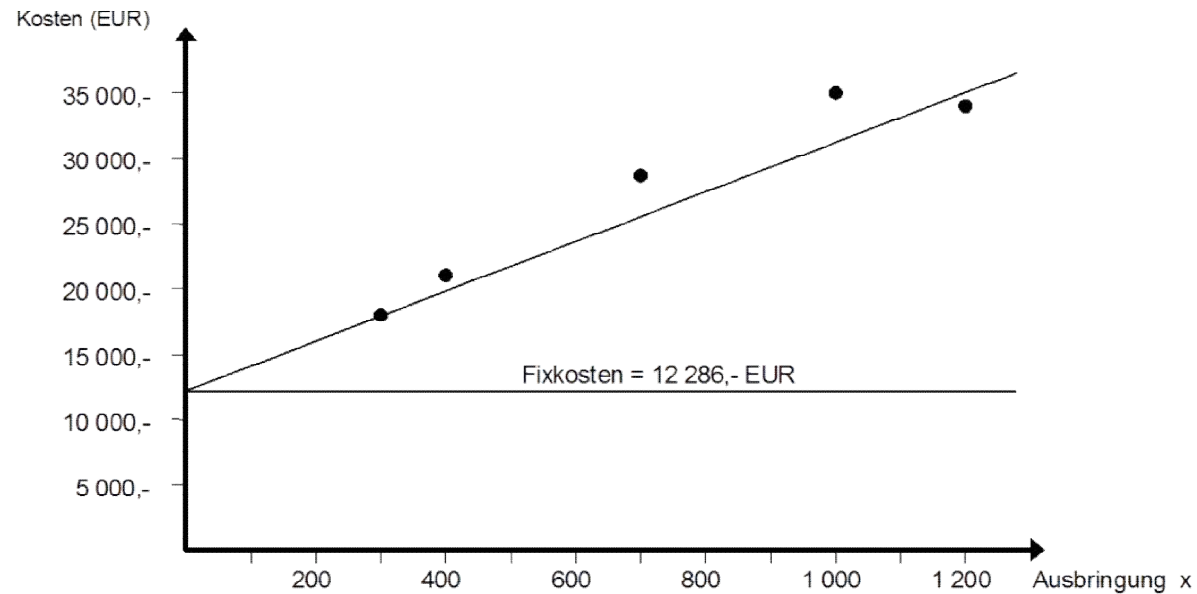

Seite 1165, Abb. 70: Mathematische Methode der Kostenauflösung



## KAPITEL I: RECHNUNGSWESEN UND CONTROLLING

### 3. KOSTENRECHNUNG

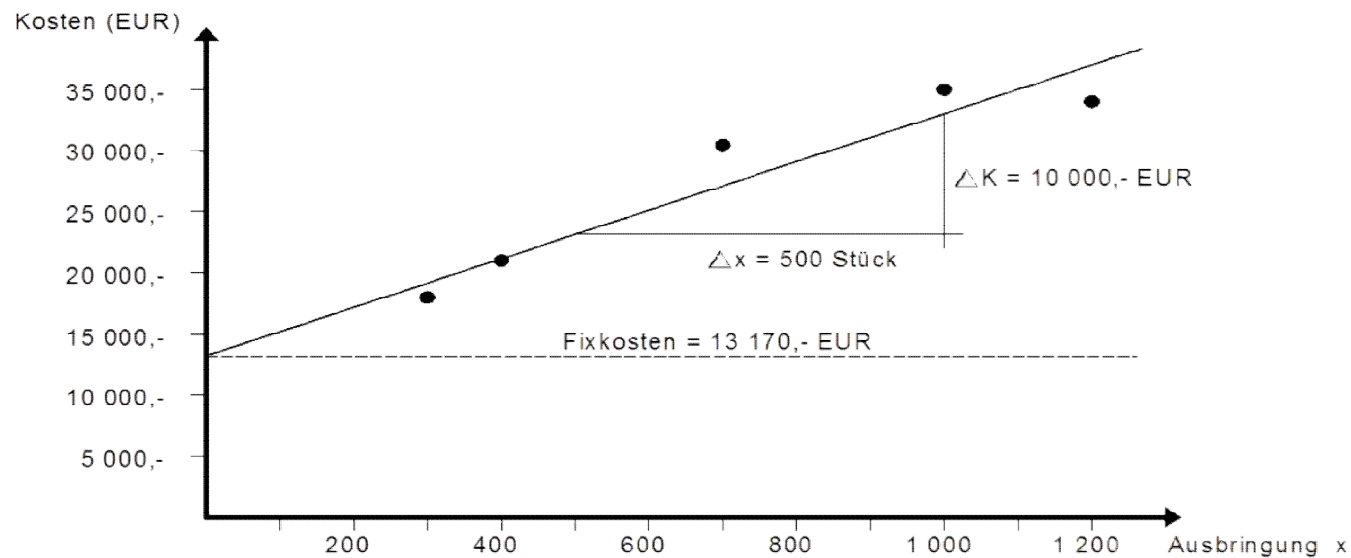

Seite 1165, Abb. 71: Grafische Methode der Kostenauflösung

# KAPITEL I: RECHNUNGSWESEN UND CONTROLLING

## 3. KOSTENRECHNUNG

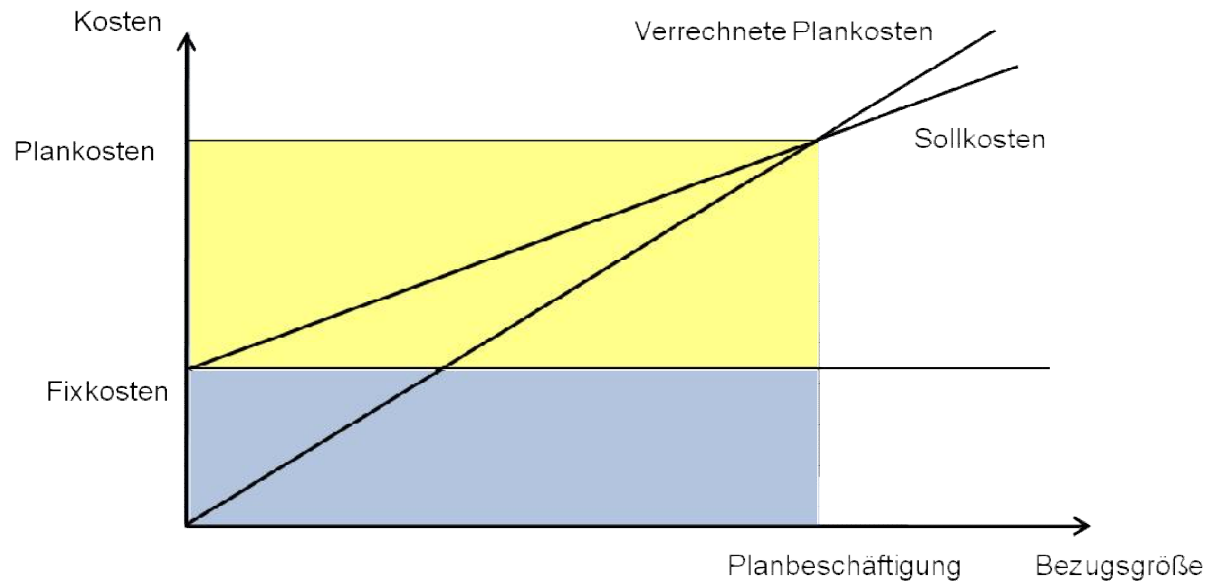

Seite 1167, Abb. 72: Gegenüberstellung von Plankosten, verrechneten Plankosten und Sollkosten

## KAPITEL I: RECHNUNGSWESEN UND CONTROLLING

### 3. KOSTENRECHNUNG

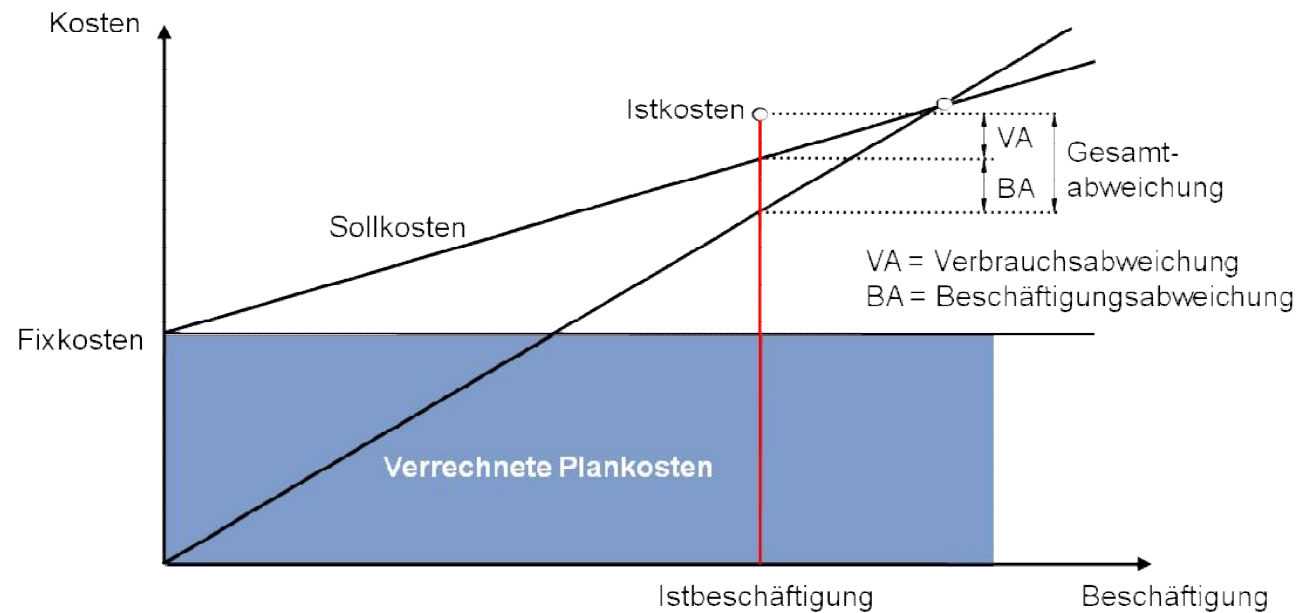

Seite 1168, Abb. 73: Abweichungsanalyse

# KAPITEL I: RECHNUNGSWESEN UND CONTROLLING

## 3. KOSTENRECHNUNG

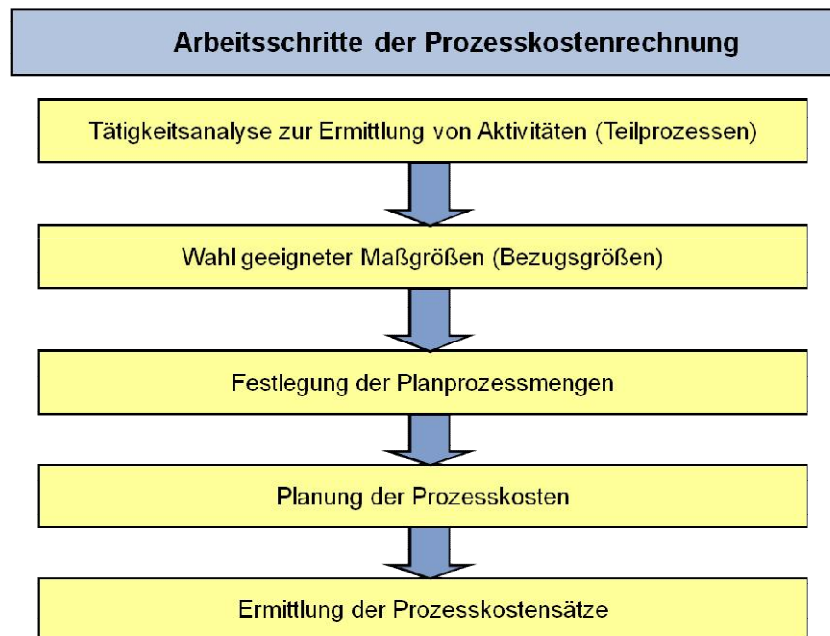

Seite 1171, Abb. 74: Arbeitsschritte der Prozesskostenrechnung

# KAPITEL I: RECHNUNGSWESEN UND CONTROLLING

## 3. KOSTENRECHNUNG

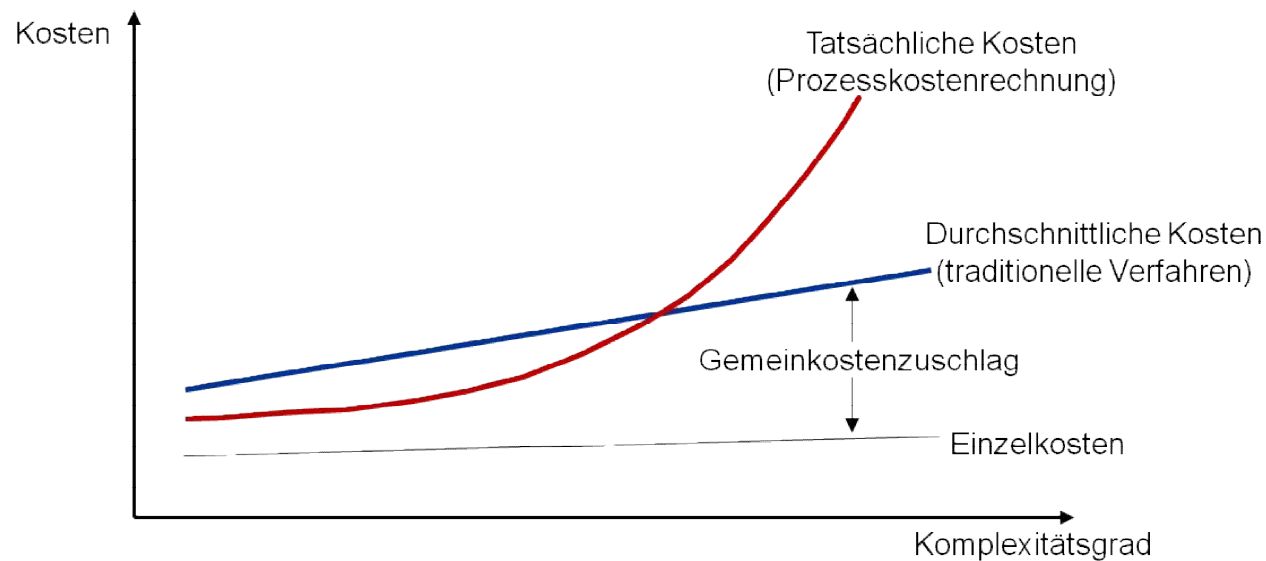

Seite 1173, Abb. 75: Zusammenhang zwischen Kosten und Komplexitätsgrad

## KAPITEL I: RECHNUNGSWESEN UND CONTROLLING

### 3. KOSTENRECHNUNG

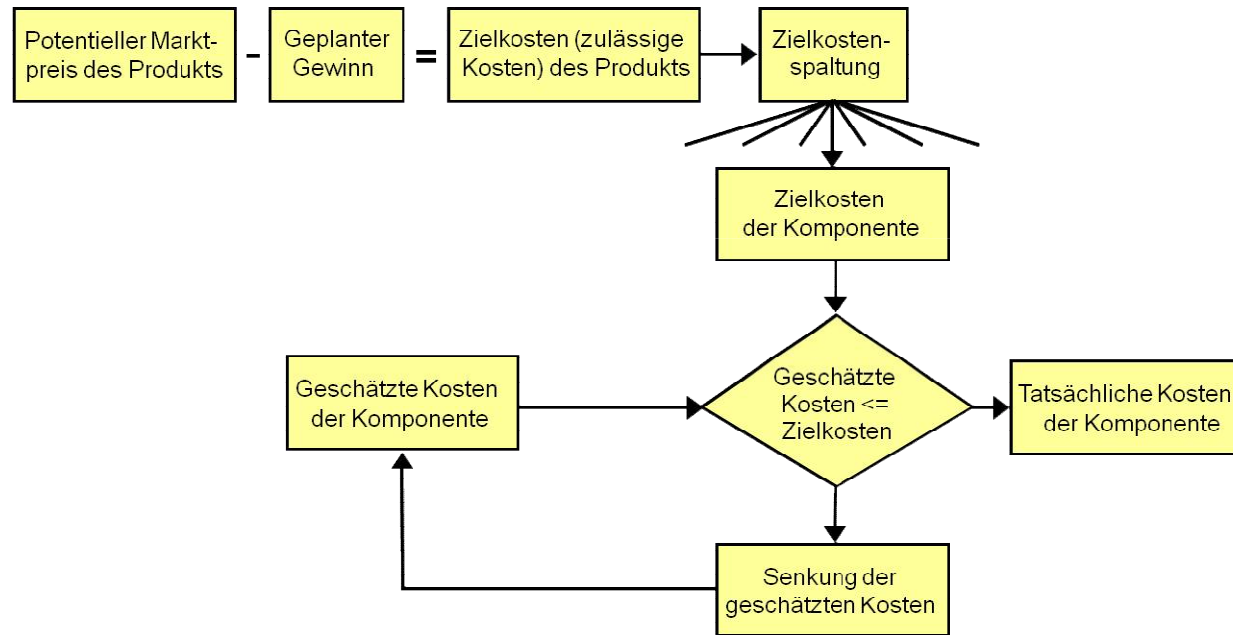

Seite 1173, Abb. 76: Ablauf der Zielkostenrechnung

## 4. DAS CONTROLLING

4.1 DER CONTROLLINGBEGRIFF

4.2 DIE ENTWICKLUNG DES CONTROLLINGS

4.3 WANDEL DER AUFGABENSCHWERPUNKTE

4.4 GESAMTUNTERNEHMENSBEZOGENES CONTROLLING

4.5 CONTROLLING DER FUNKTIONSBEREICHE

4.6 OPERATIVES UND STRATEGISCHES CONTROLLING

4.7 INSTRUMENTE UND TECHNIKEN DES CONTROLLINGS

# KAPITEL I: RECHNUNGSWESEN UND CONTROLLING

## 4. DAS CONTROLLING

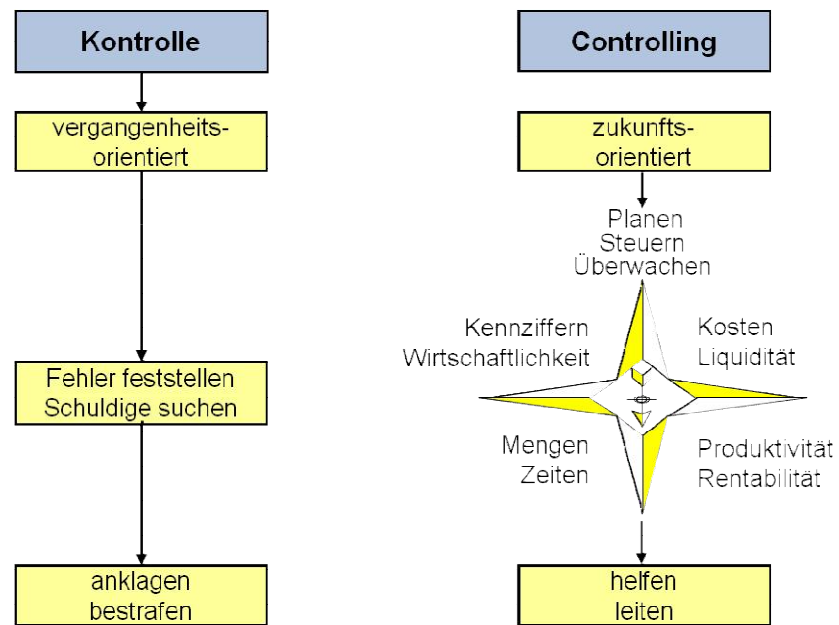

Seite 1176, Abb. 77: Unterschied zwischen Kontrolle und Controlling



## KAPITEL I: RECHNUNGSWESEN UND CONTROLLING

### 4. DAS CONTROLLING

|                                                                                                                                          |                                       |                                    |                            |
|------------------------------------------------------------------------------------------------------------------------------------------|---------------------------------------|------------------------------------|----------------------------|
| <b>Festlegung des Kontrollfeldes</b><br><b>Ermittlung von Sollgrößen</b><br><b>Ermittlung von Istgrößen</b><br><b>Soll/Ist-Vergleich</b> | <b>Traditioneller Kontrollbegriff</b> | <b>Erweiterter Kontrollbegriff</b> | <b>Controlling-begriff</b> |
| <b>Analyse der Abweichungsursachen</b>                                                                                                   |                                       |                                    |                            |
| <b>Vorschläge für Korrekturmaßnahmen</b>                                                                                                 |                                       |                                    |                            |
| <b>Korrekturentscheidung</b>                                                                                                             |                                       |                                    |                            |

Seite 1177, Abb. 78: Zusammenhang zwischen Kontrolle und Controlling

# KAPITEL I: RECHNUNGSWESEN UND CONTROLLING

## 4. DAS CONTROLLING

| FINANCIAL MANAGEMENT                                                                                                                                                                                                                                                                                                                                                                                                                                                                                                                                                                                                                                                                                                                                                                                                                                                                                                                                                                                                                                                                                                                                                                                                                                                                                                                                                                                                                                                                                                                                                                                                   |                                                                                                                                                                                                                                                                                                                                                                                                                                                                                                                                                                                                                                                                                                                                                                                                                                                                                                                                                                                                                                                                                                                                                                                                                                                                                                                                                                                                                          |
|------------------------------------------------------------------------------------------------------------------------------------------------------------------------------------------------------------------------------------------------------------------------------------------------------------------------------------------------------------------------------------------------------------------------------------------------------------------------------------------------------------------------------------------------------------------------------------------------------------------------------------------------------------------------------------------------------------------------------------------------------------------------------------------------------------------------------------------------------------------------------------------------------------------------------------------------------------------------------------------------------------------------------------------------------------------------------------------------------------------------------------------------------------------------------------------------------------------------------------------------------------------------------------------------------------------------------------------------------------------------------------------------------------------------------------------------------------------------------------------------------------------------------------------------------------------------------------------------------------------------|--------------------------------------------------------------------------------------------------------------------------------------------------------------------------------------------------------------------------------------------------------------------------------------------------------------------------------------------------------------------------------------------------------------------------------------------------------------------------------------------------------------------------------------------------------------------------------------------------------------------------------------------------------------------------------------------------------------------------------------------------------------------------------------------------------------------------------------------------------------------------------------------------------------------------------------------------------------------------------------------------------------------------------------------------------------------------------------------------------------------------------------------------------------------------------------------------------------------------------------------------------------------------------------------------------------------------------------------------------------------------------------------------------------------------|
| CONTROLLERSHIP                                                                                                                                                                                                                                                                                                                                                                                                                                                                                                                                                                                                                                                                                                                                                                                                                                                                                                                                                                                                                                                                                                                                                                                                                                                                                                                                                                                                                                                                                                                                                                                                         | TREASURERSHIP                                                                                                                                                                                                                                                                                                                                                                                                                                                                                                                                                                                                                                                                                                                                                                                                                                                                                                                                                                                                                                                                                                                                                                                                                                                                                                                                                                                                            |
| <p><b>Planung</b><br/>Aufstellung, Koordinierung und Durchführung von Unternehmensplänen als integrierter Teil des Managements zur Kontrolle des Geschäftsablaufes. Die Planung umfasst Gesamtpläne, Programme für die Kapitalinvestitionen und Finanzierungen, Abrechnungspläne, Gemeinwesenbudgets und Kostenstandards.</p> <p><b>Berichterstattung und Interpretation</b><br/>Vorgabe der Aufstellung mit den Plänen und Standards und Berichterstattung sowie Interpretation der Resultate des Geschäftsablaufes an alle Bereiche des Managements und die Kapitalgeber. Diese Funktionen schließt die Formulierung von Durchführungs- und Bilanzrichtlinien ein, die Koordinierung der Systeme und Vorgänge sowie die Vorbereitung von zu bearbeitenden Daten und Sonderberichten.</p> <p><b>Bewertung und Beratung</b><br/>Beratung mit allen Teilen des Managements, die für die Richtlinien und Ausrichtungen in den verschiedenen Unternehmensbereichen verantwortlich sind, wenn es sich um die Erreichung der gesetzten Ziele und der Wahrung der Richtlinien sowie der Organisationsstruktur und -abläufe handelt.</p> <p><b>Steuerangelegenheiten</b><br/>Aufstellung und Anwendung von Richtlinien und Verfahren für die Beauftragung von Steuerangelegenheiten.</p> <p><b>Berichterstattung an staatliche Stellen</b><br/>Kontrolle und Koordinierung der Abfassung von Berichten an staatliche Stellen.</p> <p><b>Sicherung des Vermögens</b><br/>Durch betriebliche Kontrollen und Revisionen sowie durch Überwachung des Versicherungsschutzes ist die Sicherheit des Vermögens zu gewährleisten.</p> | <p><b>Kapitalbeschaffung</b><br/>Aufstellung und Ausführung von Programmen für die Kapitalbeschaffung einschließlich der Verhandlungen zur Kapitalbeschaffung und der Erzielung der notwendigen finanziellen Verbindungen.</p> <p><b>Verbindung zu Investoren</b><br/>Schaffung und Pflege eines Marktes für die Wertpapiere des Unternehmens und in Verbindung damit Unterhaltung von entsprechenden Kontakten zu Investitionsbanken, Finanzexperten und Aktionären.</p> <p><b>Kurzfristige Finanzierung</b><br/>Beschaffung und Erhaltung von Quellen für den laufenden kurzfristigen Kreditbedarf des Unternehmens, wie Wirtschaftsbanken und andere Kreditinstitute.</p> <p><b>Bankverbindungen und Aufsicht</b><br/>Die Bankverbindungen wahrnehmen, die Aufsicht über die Finanzgüter und Wertpapiere ausüben und diese auch günstig anlegen sowie die Verantwortung für die finanziellen Risiken im Innenbankgeschäft übernehmen.</p> <p><b>Kredite und Forderungseinzug</b><br/>Überwachung der Gewährung von Kreditkreditlinien und des Einzugs der fälligen Forderungen einschließlich der Kontrolle von Sondervereinbarungen für Kreditkreditlinien sowie Rückzahlung und Mängel.</p> <p><b>Kapitalanlage</b><br/>Zweckmäßige Anlage von Kapitalfonds des Unternehmens sowie Anschaffung und Koordination von Richtlinien für die Anlage von Kapital in Finanzinvestitionen oder ähnliche Veranlassungen.</p> |

Seite 1179, Abb. 79: Aufgaben der finanziellen Unternehmensführung

# KAPITEL I: RECHNUNGSWESEN UND CONTROLLING

## 4. DAS CONTROLLING

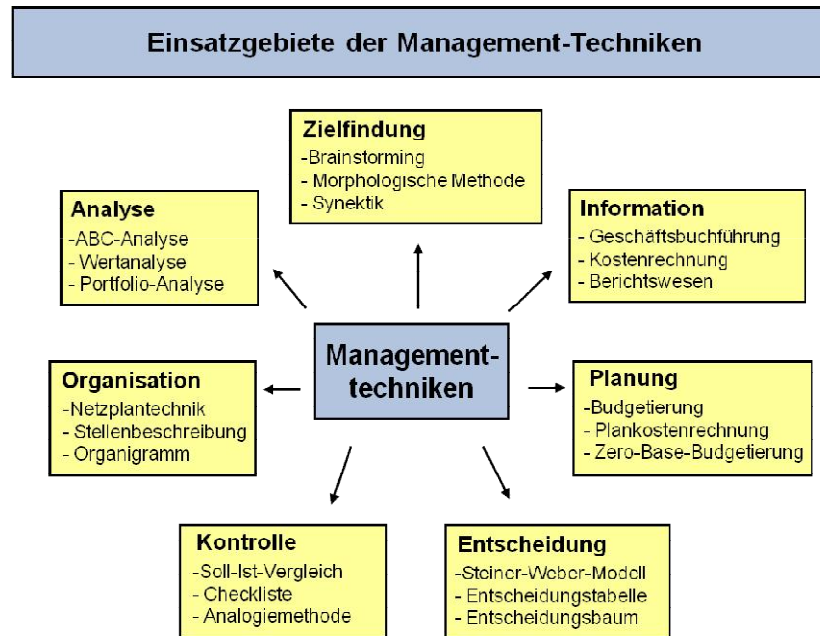

Seite 1184, Abb. 80: Einsatzgebiete der Management-Techniken

# KAPITEL I: RECHNUNGSWESEN UND CONTROLLING

## 4. DAS CONTROLLING

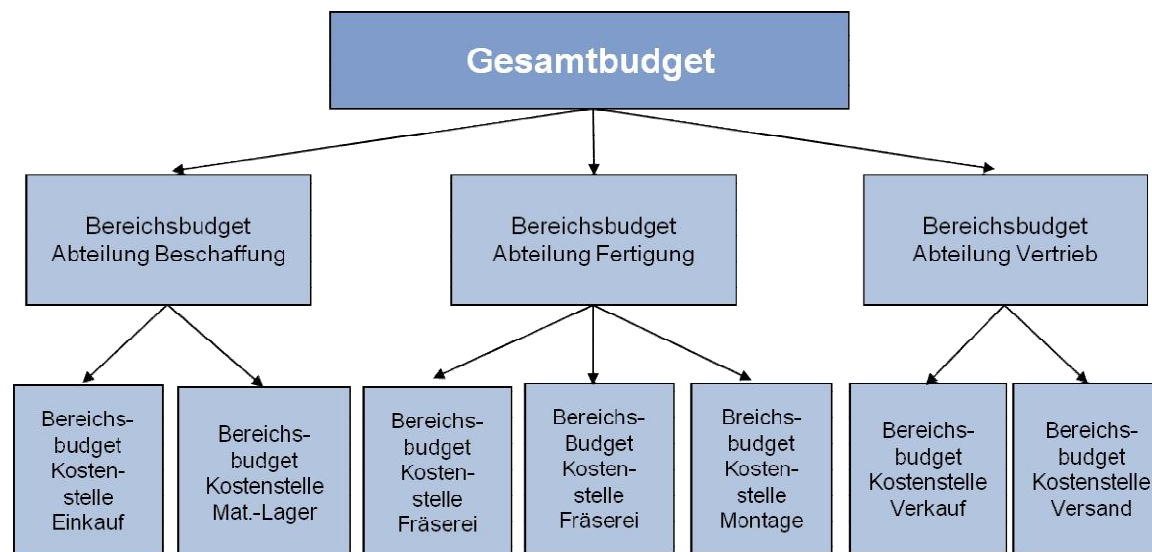

Seite 1185, Abb. 81: Gesamtbudget und Bereichsbudgets

## KAPITEL I: RECHNUNGSWESEN UND CONTROLLING

### 4. DAS CONTROLLING

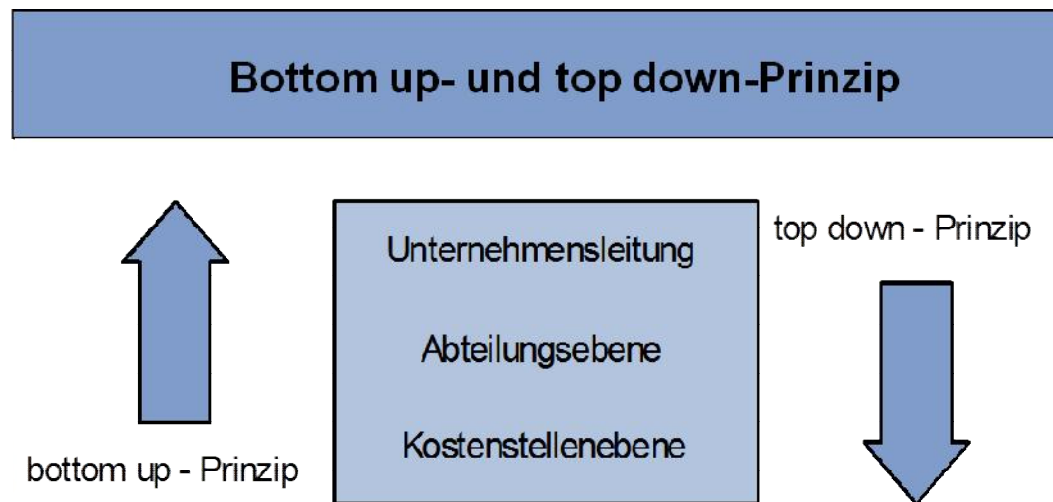

Seite 1186, Abb. 82: Bottom up- und top down-Prinzip

## KAPITEL I: RECHNUNGSWESEN UND CONTROLLING

### 4. DAS CONTROLLING

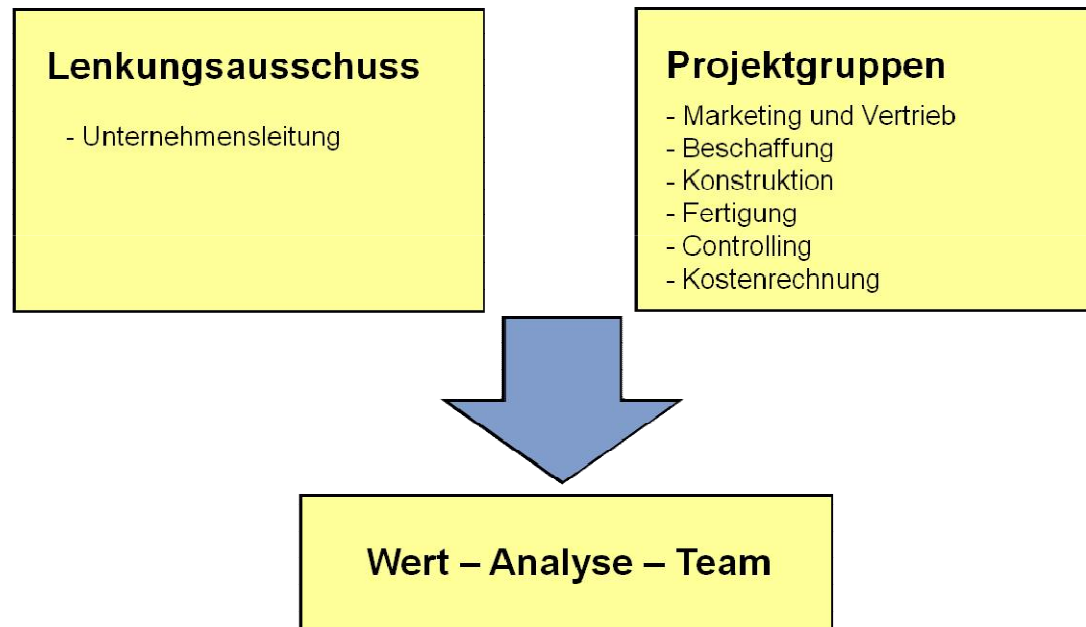

Seite 1189, Abb. 83: Typische Zusammensetzung eines Wert-Analyse-Teams

# KAPITEL I: RECHNUNGSWESEN UND CONTROLLING

## 4. DAS CONTROLLING

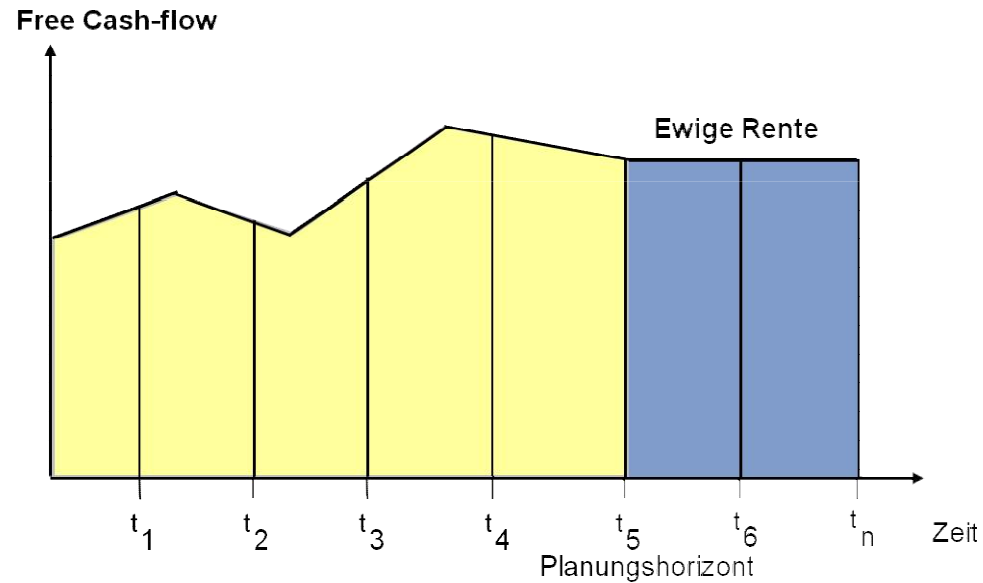

Seite 1191, Abb. 84: Die Discounted-Cash-Flow-Methode

## KAPITEL I: RECHNUNGSWESEN UND CONTROLLING

### 4. DAS CONTROLLING

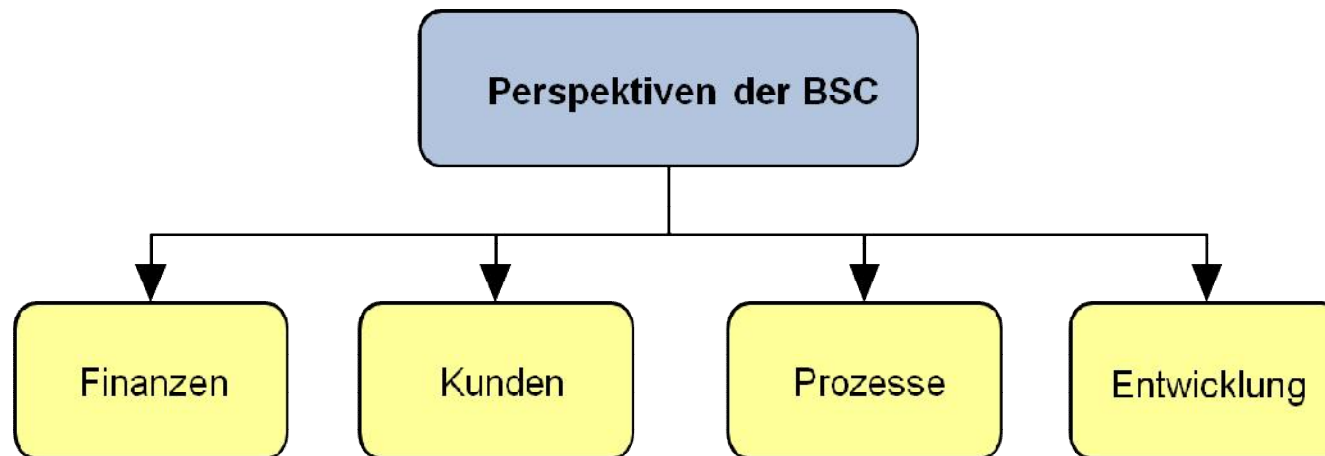

Seite 1191, Abb. 85: Die unterschiedlichen Perspektiven der Balanced Scorecard



# KAPITEL I: RECHNUNGSWESEN UND CONTROLLING

## 4. DAS CONTROLLING

| Perspektive                                | Zweck                                                                                                    | Typische Kennzahlen                                                                          |
|--------------------------------------------|----------------------------------------------------------------------------------------------------------|----------------------------------------------------------------------------------------------|
| <b>Finanzwirtschaftliche Perspektive</b>   | Hinweis darauf, ob die Strategie eines Unternehmens zur Verbesserung des Ergebnisses führt               | Rentabilität, Wachstum, Unternehmenswert                                                     |
| <b>Kundenperspektive</b>                   | Darstellung, wie das Unternehmen aus Sicht der Kunden eingeschätzt wird                                  | Zeit, Qualität, Produktleistung, Service, Preis                                              |
| <b>Betriebsablaufinterne Perspektive</b>   | Informationen über betriebsinterne Prozesse, die wesentlichen Einfluss auf die Kundenzufriedenheit haben | Zykluszeiten, Qualität, Fertigungszeit des Personals, Produktivität                          |
| <b>Innovations- und Wissensperspektive</b> | Informationen über die Fähigkeit des Unternehmens, sich zu verbessern und Innovationen einzuführen       | Durchschnittsalter der Produkte, Umsatzanteil der Neuprodukte, Verringerung der Lieferzeiten |

Seite 1193, Abb. 86: Die Balanced Scorecard und ihre Dimensionen

# KAPITEL I: RECHNUNGSWESEN UND CONTROLLING

## 5. TRENDS UND ENTWICKLUNGEN

| Grundlagen              | HGB                                                        | IFRS/US-GAAP                                                          |
|-------------------------|------------------------------------------------------------|-----------------------------------------------------------------------|
| Hauptadressaten         | Fremdkapitalgeber<br>(kreditororientierte Rechnungslegung) | Eigenkapitalgeber (kapitalmarkt-orientierte Rechnungslegung)          |
| Rechnungslegungszweck   | Gläubigerschutz und Kapitalerhaltung                       | Anlegerschutz, investorenorientierte Rechnungslegung                  |
| Vorherrschendes Prinzip | Vorsichtsprinzip                                           | Periodengerechte Erfolgsermittlung                                    |
| Zielsetzung             | Zahlungsbemessungsfunktion                                 | Informationsfunktion                                                  |
| Wirtschaftliche Lage    | Abbildung der Verhältnisse im Rahmen der GoB               | Fair Presentation – True and fair view                                |
| Normensetzende Instanz  | Gesetzgeber, oberste Gericht                               | IASB (IFRS) FASB (US-GAAP)                                            |
| Rechtssystem            | Code Law bzw. principle based                              | Case Law bzw. rule based                                              |
| Steuerliche Einflüsse   | Maßgeblichkeit und umgekehrte Maßgeblichkeit               | Kein Einfluss, Trennung von Handels- und Steuerbilanz                 |
| Erfolgsrechnung         | Gewinn- und Verlustrechnung                                | Incomestatement (ähnlich der GuV)<br>Other comprehensive income (OCI) |

Seite 1196, Abb. 87: Wesentliche Unterschiede zwischen HGB und IFRS/US-GAAP  
(Vgl. Keitz, I.: Praxis der IASB-Rechnungslegung, 2. Aufl., Stuttgart 2005, S. 4 ff)

# KAPITEL I: RECHNUNGSWESEN UND CONTROLLING

## 5. TRENDS UND ENTWICKLUNGEN

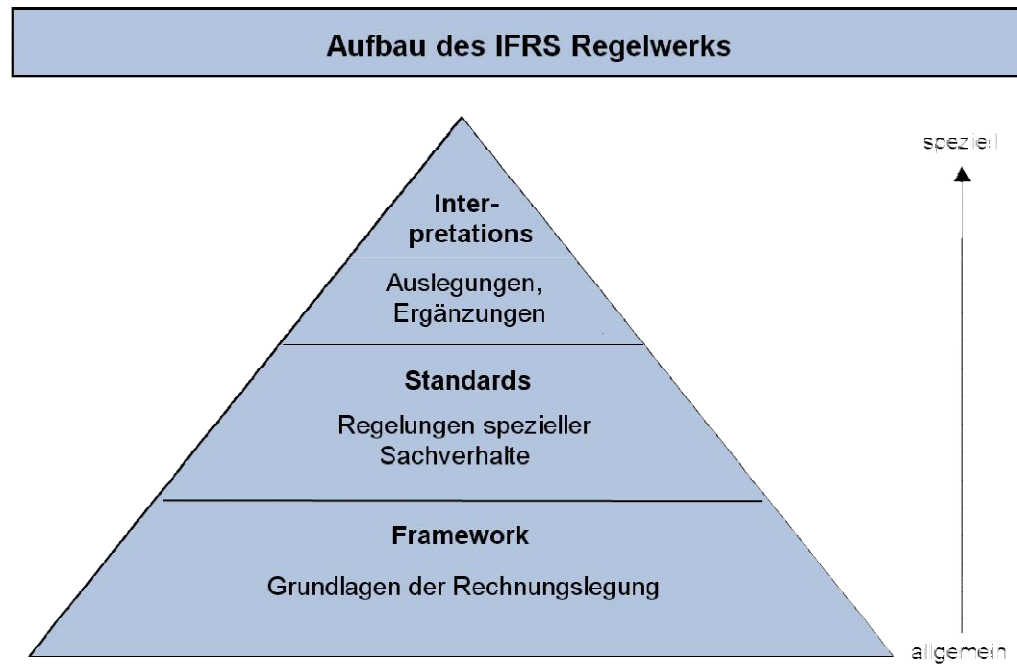

Seite 1197, Abb. 88: Aufbau des IFRS-Regelwerks

# KAPITEL I: RECHNUNGSWESEN UND CONTROLLING

## 5. TRENDS UND ENTWICKLUNGEN

| Aktiva                                                                                                                                 | HGB                                                                                                                                                           | IAS/IFRS                                                                                                                                                                                                                                                   |
|----------------------------------------------------------------------------------------------------------------------------------------|---------------------------------------------------------------------------------------------------------------------------------------------------------------|------------------------------------------------------------------------------------------------------------------------------------------------------------------------------------------------------------------------------------------------------------|
| <b>Immaterielle Vermögensgegenstände</b><br>:<br>- erworben<br>- selbst geschaffen<br>- Entwicklungskosten<br>- Derivativer Firmenwert | <b>AHK</b><br>Aktivierungsgebot<br>Aktivierungsverbot<br>Aktivierungsverbot<br>Aktivierungswahlrecht                                                          | <b>AHK (Neubewertung mögl.)</b><br>Aktivierungsgebot<br>Aktivierungsgebot unter Voraussetzungen<br>Gebot, wenn 5 Kriterien erfüllt<br>Aktivierungspflicht                                                                                                  |
| <b>Sachanlagen</b>                                                                                                                     | AHK (= Obergrenze),<br>meist steuerrechtliche<br>Abschreibungsstabellen,<br>außerplanmäßige<br>Abschreibung auf<br>beizulegenden Wert,<br>Wertaufholungsgebot | AHK (Neubewertung möglich),<br>Abschreibung nach<br>wirtschaftlicher Nutzung,<br>außerplanmäßige<br>Abschreibung auf<br>Verkaufswert,<br>Wertaufholungsgebot                                                                                               |
| <b>Finanzanlagen</b>                                                                                                                   | Unterscheidung zwischen<br>Anlage- und Umlaufvermögen<br><br>Max. AK, gemildertes/strenges<br>Niederwertprinzip<br>Wertaufholungsgebot                        | Wertpapierkategorien:<br>- trading securities<br>- held-to-maturity securities<br>available-for-sale securities<br>self-originated loans and<br>receivables<br>Beizulegender Wert bzw.<br>fortgeführte AK<br>(Neubewertung möglich)<br>Wertaufholungsgebot |
| <b>Vorräte</b>                                                                                                                         | Max. AHK,<br>Voll- und Teilkostenbewertung<br>möglich<br>„completed-contract“ Methode                                                                         | Max. AHK,<br>Vollkostenbewertung<br>„percentage-of-completion“<br>Methode                                                                                                                                                                                  |
| <b>Sonderfall: Langfristige Auftragsfertigung</b>                                                                                      |                                                                                                                                                               |                                                                                                                                                                                                                                                            |
| <b>Forderungen</b>                                                                                                                     | Pauschalwertberichtigungen<br>(mit stillen Reserven)<br>Fremdwährungsforderungen:<br>max. AK oder niedrigerer<br>Stichtagkurs                                 | Angemessene<br>Wertberichtigungen<br>Fremdwährungsforderungen<br>werden zum fair value<br>(Stichtagkurs) bewertet                                                                                                                                          |
| <b>Leasing</b>                                                                                                                         | Keine spezifische Regelung:<br>Grundmiete > 40 % oder<br>< 90 % der<br>betriebsgewöhnlichen<br>Nutzungsdauer -> Ansatz<br>durch Leasinggeber                  | - finance lease: Ansatz durch<br>Leasingnehmer<br>- operating lease: Ansatz<br>durch Leasinggeber                                                                                                                                                          |

Seite 1198/1199, Abb. 89 (Teil 1): Vergleich ausgewählter Bilanzposten von HGB und IAS/IFRS

# KAPITEL I: RECHNUNGSWESEN UND CONTROLLING

## 5. TRENDS UND ENTWICKLUNGEN

|                                           | HGB                                                                                                                                                                      | IAS/IFRS                                                                                                                                                         |
|-------------------------------------------|--------------------------------------------------------------------------------------------------------------------------------------------------------------------------|------------------------------------------------------------------------------------------------------------------------------------------------------------------|
| <b>Eigenkapital</b>                       | Gliederung:<br>- gez. Kapital<br>- Kapitalrücklagen<br>- Gewinnrücklagen<br>- Rücklagen für eigene Anteile<br>- Gewinn-/Verlustvortrag<br>- Jahresüberschuss/-fehlbetrag | Gliederung:<br>- gez. Kapital<br>- Kapitalrücklagen<br>- Neubewertungsrücklage<br>- ausschüttungsgesperrte Rücklage<br>- Gewinnrücklage<br>- Minderheitenanteile |
| <b>Rückstellungen</b>                     | Großer Ermessensspielraum, es dürfen auch Aufwandsrückstellungen gebildet werden                                                                                         | Enge Vorgaben, es existieren nur Pflichtrückstellungen, die eine Außenverpflichtung voraussetzen                                                                 |
| <b>Mindesteintrittswahrscheinlichkeit</b> | Aufgrund des Vorsichtsprinzips niedrigere Wahrscheinlichkeit als 50 %                                                                                                    | Mindestens > 50 %                                                                                                                                                |
| <b>Pensionsrückstellungen</b>             | Passivierungspflicht für Neuzusagen ab 1.1.1987; Anwartschaftsdeckungsverfahren, Teilwertverfahren, meist zu niedrig bewertet (keine Dynamisierung)                      | Passivierungspflicht; Anwartschaftsbarwertverfahren, korrekter bewertet (Dynamisierung, d.h. Lohn-, Gehalts- und Rentenentwicklung werden berücksichtigt)        |

Seite 1198/1199, Abb. 89 (Teil 2): Vergleich ausgewählter Bilanzposten von HGB und IAS/IFRS

# KAPITEL I: RECHNUNGSWESEN UND CONTROLLING

## 5. TRENDS UND ENTWICKLUNGEN

| Bewertung                                | HGB                                                                         | IAS/IFRS                                                                 |
|------------------------------------------|-----------------------------------------------------------------------------|--------------------------------------------------------------------------|
| Einzelbewertung                          | Ja                                                                          | Ja                                                                       |
| Bewertungsgrundsatz                      | Obergrenze: AHK                                                             | Neubewertung möglich                                                     |
| Festwert                                 | zulässig                                                                    | Eventuell zulässig                                                       |
| Nutzungsdauer                            | Steuerlich beeinflusst                                                      | Geschätzte tatsächliche Nutzungsdauer                                    |
| Bewertungsmaßstäbe                       |                                                                             |                                                                          |
| AHK                                      | Ja                                                                          | Ja                                                                       |
| Wiederbeschaffungskosten                 | Ja                                                                          | Nein                                                                     |
| Verkaufswert                             | Ja                                                                          | Ja                                                                       |
| Gegenwartswert                           | Ja                                                                          | Ja                                                                       |
| Wertaufholung                            | Pflicht (Kapitalgesellschaften)                                             | Pflicht                                                                  |
| Neubewertung                             | Verbot                                                                      | Wahlrecht                                                                |
| Außerplanmäßige Abschreibungen           | Wertminderung:<br>Dauemd = Pflicht,<br>vorübergehend = Wahlrecht<br>beim AV | Pflicht                                                                  |
| Steuerliche Abschreibung                 | Wahlrecht                                                                   | Verbot                                                                   |
| Möglichkeit zur Bildung stiller Reserven | In großem Umfang durch Wahlrecht und Ermessensspielraum                     | Stark eingeschränkt durch „true and fair view“ sowie „fair presentation“ |

Seite 1199, Abb. 90: Bewertung nach HGB und IAS/IFRS

# KAPITEL I: RECHNUNGSWESEN UND CONTROLLING

## 5. TRENDS UND ENTWICKLUNGEN

| Bilanzposition/Kennzahl   | Veränderung<br>(Mittelwert) |
|---------------------------|-----------------------------|
| Immaterielles Vermögen    | +104 %                      |
| Eigenkapital              | +20 %                       |
| Fremdkapital              | +10 %                       |
| Pensionsrückstellungen    | +21 %                       |
| Sonstige Rückstellungen   | -25 %                       |
| Verbindlichkeiten         | +20 %                       |
| Anlagevermögen            | +17 %                       |
| Anlagenintensität         | +12 %                       |
| Eigenkapitalquote         | +8 %                        |
| Gesamtkapitalrentabilität | +13 %                       |

Seite 1200, Abb. 91: Auswirkungen der Umstellung von HGB auf IFRS  
 (Vgl. Burger, A./ Fröhlich, J./ Ulbrich, P.: Die Auswirkungen der Umstellung von HGB auf IFRS auf  
 wesentliche Kennzahlen der externen Unternehmensrechnung. In: Kapitalmarktorientierte Rechnungslegung,  
 Heft 9/2004, S. 353 ff.)

*Jung: Allgemeine Betriebswirtschaftslehre. De Gruyter Oldenbourg 2016. ISBN 978-3-486-76376-8*
