# Supplementary material
Source: publisher site journal article supplement (https://www.degruyterbrill.com/publication/isbn/9783486989434/downloadAsset/9783486989434_Folien--de.zip)
Supplement: Supplementary file 10 [file Uebersicht_Allg._BWL.pdf › Uebersicht_Allg._BWL.pdf]

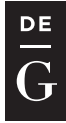

DE GRUYTER  
OLDENBOURG

# ZUSATZMATERIALIEN

## ALLGEMEINE BETRIEBSWIRTSCHAFTSLEHRE

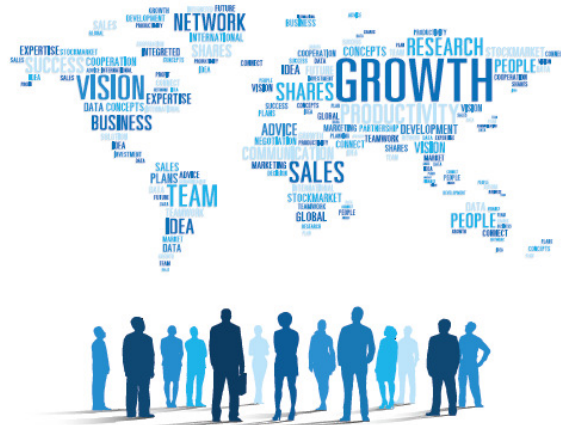

---

Jung: Allgemeine Betriebswirtschaftslehre. De Gruyter Oldenbourg 2016. ISBN 978-3-486-76376-8

## **ALLGEMEINE BETRIEBSWIRTSCHAFTSLEHRE**

KAPITEL A GRUNDLAGEN DER BETRIEBSWIRTSCHAFTSLEHRE

KAPITEL B KONSTITUTIVE ENTSCHEIDUNGEN DES BETRIEBES

KAPITEL C UNTERNEHMENSFÜHRUNG UND ORGANISATION

KAPITEL D MATERIALWIRTSCHAFT

KAPITEL E PRODUKTIONSWIRTSCHAFT

KAPITEL F ABSATZ UND MARKETING

KAPITEL G KAPITALWIRTSCHAFT

KAPITEL H PERSONALWIRTSCHAFT

KAPITEL I RECHNUNGSWESEN UND CONTROLLING
